# Supplementary material for: Kinetic resolution of sulfur-stereogenic sulfoximines by Pd(ii)–MPAA catalyzed C–H arylation and olefination
Source: PubMed Central journal article supplement — Chem Sci. 2021 Oct 20;12(44):14863–70. doi: 10.1039/d1sc04299h (PMC8597855; doi:10.1039/d1sc04299h), 2021-10-20
Supplement: SC-012-D1SC04299H-s001.pdf [file SC-012-D1SC04299H-s001.pdf]

# Kinetic Resolution of Sulfur-Stereogenic Sulfoximines by Pd(II)-MPAA Catalyzed C–H Arylation and Olefination

Kallol Mukherjee, Nicolas Grimblat, Somratan Sau, Koushik Ghosh, Majji Shankar, Vincent Gandon,\* and  
Akhila K. Sahoo\*

School of Chemistry, University of Hyderabad, Hyderabad 500046, India

[vincent.gandon@universite-paris-saclay.fr](mailto:vincent.gandon@universite-paris-saclay.fr)

and

[akhilchemistry12@gmail.com](mailto:akhilchemistry12@gmail.com); [akssc@uohyd.ac.in](mailto:akssc@uohyd.ac.in)

## SUPPORTING INFORMATION

| <b>Table of Contents</b>                              | <b>Page</b> |
|-------------------------------------------------------|-------------|
| General Experimental Information                      | S2          |
| Materials                                             | S2          |
| Experimental Procedures, Spectral and Analytical data | S3–S32      |
| X-ray crystal structure and data                      | S32–S34     |
| DFT Studies                                           | S34–S79     |
| References                                            | S80– S81    |
| NMR data                                              | S82–S211    |
| HPLC data                                             | S212–S280   |

## 1. General Experimental Information:

All the reactions were performed in oven-dried screw capped tubes. Commercial grade solvents were distilled prior to use. Column chromatography was performed using either 100–200 Mesh or 230–400 Mesh silica gel. Thin layer chromatography (TLC) was performed on silica gel GF254 plates. Visualization of spots on TLC plates was accomplished with UV light (254 nm) and staining over I<sub>2</sub> chamber.

Proton, carbon, and fluorine nuclear magnetic resonance spectra (<sup>1</sup>H NMR, <sup>13</sup>C NMR, and <sup>19</sup>F NMR) were recorded based on the resonating frequencies as follows: (<sup>1</sup>H NMR, 400 MHz; <sup>13</sup>C NMR, 101 MHz; <sup>19</sup>F NMR, 376 MHz) and (<sup>1</sup>H NMR, 500 MHz; <sup>13</sup>C NMR, 126 MHz; <sup>19</sup>F NMR, 470 MHz) having the solvent resonance as internal standard (<sup>1</sup>H NMR, CDCl<sub>3</sub> at 7.26 ppm; <sup>13</sup>C NMR, CDCl<sub>3</sub> at 77.0 ppm). In few cases, tetramethylsilane (TMS) was used as reference standard at 0.00 ppm. Data for <sup>1</sup>H NMR are reported as follows: chemical shift (ppm), multiplicity (s = singlet; bs = broad singlet; d = doublet; bd = broad doublet, t = triplet; bt = broad triplet; q = quartet; m = multiplet), coupling constants, *J*, in (Hz), and integration. Data for <sup>13</sup>C NMR, <sup>19</sup>F NMR were reported in terms of chemical shift (ppm). IR spectra were reported in cm<sup>-1</sup>. LC–MS spectra were obtained with ionization voltage of 70 eV; data was reported in the form of *m/z* (intensity relative to base peak = 100). Melting points were determined by electro–thermal heating and are uncorrected. High resolution mass spectra were obtained in ESI mode. X-ray data was collected at 298K using graphite monochromated Mo–K $\alpha$  radiation (0.71073 Å).

Enantiomeric ratios (er) were determined on a Shimadzu LC-20AD HPLC system using commercially available chiral columns. All racemic products were prepared under the same procedure than the chiral products although with the employment of a racemic monoprotected amino acid ligand.

**Materials:** Unless otherwise noted, all the reagents and intermediates were obtained commercially and used without purification. Dichloromethane (DCM), 1,2-dichloroethane (DCE), and 1,4-dioxane were distilled over CaH<sub>2</sub>. Pd(OAc)<sub>2</sub>, trifluoro toluene (TFT), quinones, acrylates, boronic acids and amino acid ligands were purchased from Sigma Aldrich Ltd, and used as received. Analytical and spectral data of all the known compounds are exactly matching with reported values.



## 2. Experimental Procedures:

### 2.1 Preparation of substrates

#### General procedure for the synthesis of racemic (rac) **1a–1l** (GP-1):<sup>1</sup>

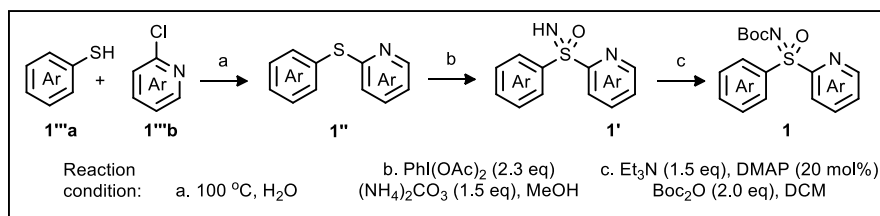

A suspension mixture of thiol **1'''a** (5.5 mmol) and substituted-2-chloro pyridine **1'''b** (5.0 mmol) in H<sub>2</sub>O (5.0 mL) was taken in a 50 mL screw capped tube and stirred at 100 °C for 6 h. After reaction completion, the product was extracted with EtOAc (2 × 100 mL). Then the combined organic extracts were washed with NaHCO<sub>3</sub> solution (2 × 100 mL). Finally the organic layer was dried over Na<sub>2</sub>SO<sub>4</sub>. The solvent was removed under reduced pressure to give the crude sulfide product **1''**, which was used for the next step without further purification.

To a stirred solution of sulfide **1''** in MeOH (10 mL) was added  $(\text{NH}_4)_2\text{CO}_3$  (0.72 g, 7.5 mmol). Subsequently,  $\text{PhI}(\text{OAc})_2$  (3.7 g, 11.5 mmol) was added and the resulting mixture was stirred at rt. Upon disappearance of sulfide (checked by TLC), the solvent was removed under reduced pressure. The phenyl iodide and other non polar impurities were eliminated though a short column filtration eluting with hexane: ethyl acetate 90:10 mixture at first and then with 100% ethyl acetate. The crude sulfoximine product **1'** was collected; which was used for the next step without further purification.

To a stirred solution of crude sulfoximine **1'** in dry CH<sub>2</sub>Cl<sub>2</sub> (100 mL) was added triethylamine (10 mmol) and 4-N,N-dimethylamino pyridine (DMAP; 1.0 mol %). The reaction mixture was stirred for 30 min at 0°C. Next, a solution of  $\text{Boc}_2\text{O}$  (10 mmol) in dry CH<sub>2</sub>Cl<sub>2</sub> (50 mL) was added. The solution was warmed to rt and stirred for 5 h. Evaporation of organic solvent and purification by column chromatography eluting with hexane: ethyl acetate 3:2 mixture gave the corresponding N-Boc protected aryl-2-pyridyl sulfoximine products **1a**, **1a-1**, **1a-2**, **1a-3**, and **1b-1l**.

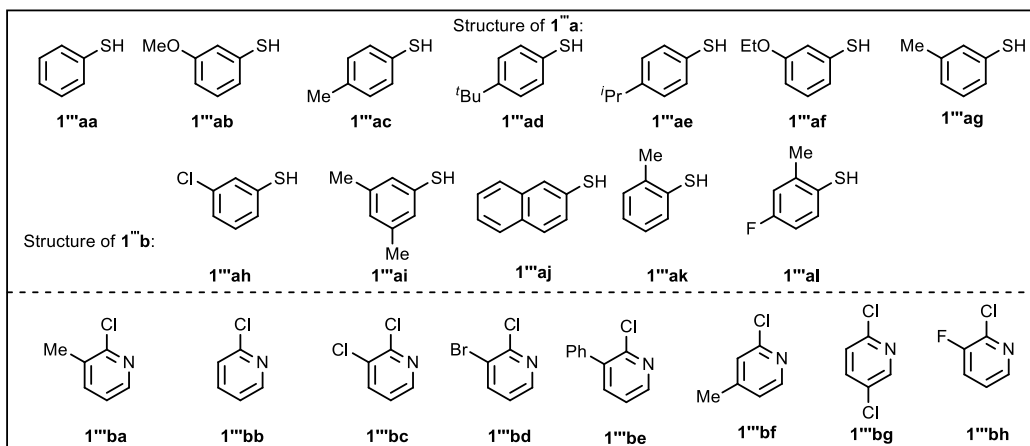

### ***N*-Boc-protected 3-methyl-2-(phenylsulfonimidoyl)pyridine (1a):**

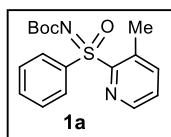

**1a** (864 mg, 52%) as colorless solid;  $^1\text{H NMR}$  (400 MHz,  $\text{CDCl}_3$ )  $\delta$  8.34 (d,  $J = 4.8$  Hz, 1H), 8.10–8.04 (m, 2H), 7.63–7.55 (m, 2H), 7.54–7.46 (m, 2H), 7.32–7.24 (m, 1H), 2.74 (s, 3H), 1.31 (s, 9H);  $^{13}\text{C NMR}$  (101 MHz,  $\text{CDCl}_3$ )  $\delta$  157.4, 155.1, 146.4, 141.7, 136.9, 135.0, 133.5, 129.2, 128.8, 126.5, 80.3, 27.8, 19.1; IR (KBr)  $\nu_{\text{max}}$  2918, 2850, 1734, 1464, 1261, 1150, 804  $\text{cm}^{-1}$ ; **HRMS (ESI)** for  $\text{C}_{17}\text{H}_{20}\text{N}_2\text{NaO}_3\text{S}$  ( $\text{M}+\text{Na}$ ) $^+$ : calcd. 355.1087, found 355.1096.

### ***N*-Boc-protected 2-(phenylsulfonimidoyl)pyridine (1a-1):**

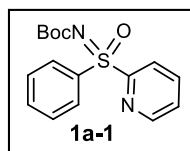

**1a-1** (860 mg, 54%) as colorless solid;  $^1\text{H NMR}$  (500 MHz,  $\text{CDCl}_3$ )  $\delta$  8.64–8.59 (m, 1H), 8.35–8.29 (m, 1H), 8.15–8.08 (m, 2H), 7.91 (t,  $J = 7.75$  Hz, 1H), 7.61–7.54 (m, 1H), 7.50 (t,  $J = 7.5$  Hz, 2H), 7.45–7.39 (m, 1H), 1.31 (s, 9H);  $^{13}\text{C NMR}$  (126 MHz,  $\text{CDCl}_3$ )  $\delta$  157.9, 157.3, 150.2, 138.1, 136.7, 133.6, 129.04, 129.00, 126.6, 123.4, 80.6, 27.8; IR (KBr)  $\nu_{\text{max}}$  2976, 1677, 1451, 1238, 911  $\text{cm}^{-1}$ ; **HRMS (ESI)** for  $\text{C}_{16}\text{H}_{18}\text{N}_2\text{NaO}_3\text{S}^+(\text{M}+\text{H})^+$ : calcd. 341.0930, found 341.0944.

### ***N*-Boc-protected 3-chloro-2-(phenylsulfonimidoyl)pyridine (1a-2):**

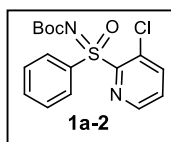

**1a-2** (864 mg, 49%) as pale-yellow solid;  $^1\text{H NMR}$  (500 MHz,  $\text{CDCl}_3$ )  $\delta$  8.61–8.55 (m, 1H), 8.17–8.11 (m, 2H), 7.78 (dt,  $J = 8.0, 1.2$  Hz, 1H), 7.64–7.57 (m, 1H), 7.54–7.47 (m, 2H), 7.42 (dd,  $J = 8.0, 4.5$  Hz, 1H), 1.34 (s, 9H);  $^{13}\text{C NMR}$  (126 MHz,  $\text{CDCl}_3$ )  $\delta$  156.9, 153.3, 147.2, 140.7, 135.8, 134.0, 130.8, 129.4, 129.0, 127.7, 80.7, 27.8; IR (KBr)  $\nu_{\text{max}}$  2977, 2923, 1738, 1700, 1246, 1151, 1084  $\text{cm}^{-1}$ ; **HRMS (ESI)** for  $\text{C}_{16}\text{H}_{17}\text{ClN}_2\text{NaO}_3\text{S}^+(\text{M}+\text{Na})^+$ : calcd. 375.0541, found 375.0551.

### ***N*-Boc-protected 3-bromo-2-(phenylsulfonimidoyl)pyridine (1a-3):**

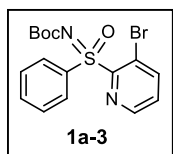

**1a-3** (1.05 g, 53%) as yellow solid;  $^1\text{H NMR}$  (500 MHz,  $\text{CDCl}_3$ )  $\delta$  8.63 (dd,  $J = 4.5, 1.0$  Hz, 1H), 8.21–8.15 (m, 2H), 8.02 (dd,  $J = 8.0, 1.5$  Hz, 1H), 7.63 (t,  $J = 7.25$  Hz, 1H), 7.53 (t,  $J = 8.0$  Hz, 2H), 7.32 (dd,  $J = 8.0, 4.5$  Hz, 1H), 1.37 (s, 9H);  $^{13}\text{C NMR}$  (101 MHz,  $\text{CDCl}_3$ )  $\delta$  157.0, 154.7, 147.7, 144.3, 135.8, 134.0, 129.6, 129.0, 127.5, 118.6, 80.8, 27.9; IR (KBr)  $\nu_{\text{max}}$  2980, 2926, 1665, 1273, 1247, 1153  $\text{cm}^{-1}$ ; **HRMS (ESI)** for  $\text{C}_{16}\text{H}_{17}\text{BrN}_2\text{NaO}_3\text{S}^+$  ( $\text{M}+\text{Na}$ ) $^+$ : calcd. 419.0035, found 419.0043.

### ***N*-Boc-protected 3-phenyl-2-(phenylsulfonimidoyl)pyridine (1a-4):**

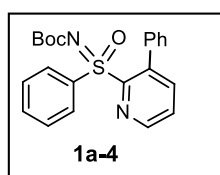

**1a-4** (828 mg, 42%) as colorless solid;  $^1\text{H NMR}$  (500 MHz,  $\text{CDCl}_3$ )  $\delta$  8.67 (bd,  $J = 4.5$  Hz, 1H), 7.84 (d,  $J = 8.0$  Hz, 2H), 7.67 (d,  $J = 6.5$  Hz, 1H), 7.55 (d,  $J = 7.25$  Hz, 1H), 7.52–7.46 (m, 1H), 7.45–7.35 (m, 5H), 7.30–7.27 (m, 2H), 1.40 (s, 9H);  $^{13}\text{C NMR}$  (126 MHz,  $\text{CDCl}_3$ )  $\delta$  157.4, 154.8, 148.0, 141.7, 138.9, 137.6, 136.2, 133.3, 129.3, 129.2, 128.7, 128.3, 127.7, 126.1, 80.4, 28.0; **HRMS (ESI)** for  $\text{C}_{22}\text{H}_{23}\text{N}_2\text{O}_3\text{S}^+$  ( $\text{M}+\text{H}$ ) $^+$ : calcd. 395.1424, found 395.1424.

### ***N*-Boc-protected 4-methyl-2-(phenylsulfonimidoyl)pyridine (1a-5):**

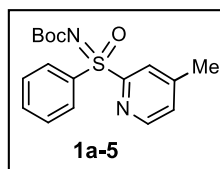

**1a-5** (914 mg, 55%) as colorless solid;  $^1\text{H NMR}$  (500 MHz,  $\text{CDCl}_3$ )  $\delta$  8.46 (d,  $J = 5.0$  Hz, 1H), 8.18–8.08 (m, 3H), 7.61–7.54 (m, 1H), 7.54–7.48 (m, 2H), 7.22 (bd,  $J = 4.5$  Hz, 1H), 2.45 (s, 3H), 1.33 (s, 9H);  $^{13}\text{C NMR}$  (126 MHz,  $\text{CDCl}_3$ )  $\delta$  157.7, 157.4, 150.1, 150.0, 137.0, 133.5, 129.03, 128.96, 127.4, 124.1, 80.6, 27.9, 21.2; **HRMS (ESI)** for  $\text{C}_{17}\text{H}_{21}\text{N}_2\text{O}_3\text{S}^+$  ( $\text{M}+\text{H}$ ) $^+$ : calcd. 333.1267, found 333.1269.

### ***N*-Boc-protected 5-chloro-2-(phenylsulfonimidoyl)pyridine (1a-6):**

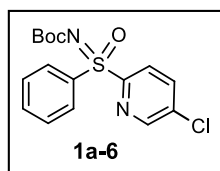

**1a-6** (864 mg, 49%) as colorless solid;  $^1\text{H NMR}$  (500 MHz,  $\text{CDCl}_3$ )  $\delta$  8.56 (dd,  $J = 2.5, 0.5$  Hz, 1H), 8.29 (dd,  $J = 8.25, 1.25$  Hz, 1H), 8.15–8.09 (m, 2H), 7.89 (dd,  $J = 8.5, 2.5$  Hz, 1H), 7.65–7.58 (m, 1H), 7.57–7.50 (m, 2H), 1.36 (s, 9H);  $^{13}\text{C NMR}$  (126 MHz,  $\text{CDCl}_3$ )  $\delta$  157.4, 156.0, 149.2, 137.7, 136.3, 135.6, 133.9, 129.2, 129.1, 124.5, 80.9, 27.9; **HRMS (ESI)** for  $\text{C}_{16}\text{H}_{18}\text{ClN}_2\text{O}_3\text{S}^+$  ( $\text{M}+\text{H}$ ) $^+$ : calcd. 353.0721, found 353.0720.

### ***N*-Boc-protected 2-(3-methoxyphenylsulfonimidoyl)-3-methylpyridine (1b):**

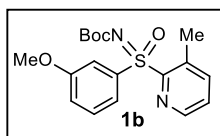

**1b** (761 mg, 42%) as colorless solid.  $^1\text{H NMR}$  (500 MHz,  $\text{CDCl}_3$ )  $\delta$  8.38 (d,  $J = 4.5$  Hz, 1H), 7.69–7.57 (m, 3H), 7.42 (t,  $J = 8.25$  Hz, 1H), 7.31 (dd,  $J = 7.5, 4.5$  Hz, 1H), 7.16–7.10 (m, 1H), 3.84 (s, 3H), 2.77 (s, 3H), 1.34 (s, 9H);  $^{13}\text{C NMR}$  (126 MHz,

CDCl<sub>3</sub>)  $\delta$  159.8, 157.5, 155.3, 146.4, 141.7, 138.3, 135.0, 129.8, 126.5, 121.5, 120.2, 113.7, 80.4, 55.7, 27.9, 19.2; IR (KBr)  $\nu_{\max}$  2970, 2926, 1739, 1649, 1367, 1241, 1038 cm<sup>-1</sup>; **HRMS (ESI)** for C<sub>18</sub>H<sub>22</sub>N<sub>2</sub>NaO<sub>4</sub>S<sup>+</sup> (M+Na)<sup>+</sup>: calcd. 385.1192, found 385.1202.

***N*-Boc-protected 3-fluoro-2-(3-methoxyphenylsulfonimidoyl)pyridine (1b-1):**

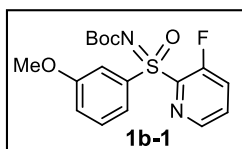

**1b-1** (769 mg, 42%) as colorless solid. <sup>1</sup>H NMR (500 MHz, CDCl<sub>3</sub>)  $\delta$  8.52–8.47 (m, 1H), 7.79–7.74 (m, 1H), 7.68–7.64 (m, 1H), 7.57–7.50 (m, 2H), 7.46–7.38 (m, 1H), 7.17–7.11 (m, 1H), 3.84 (s, 3H), 1.37 (s, 9H); <sup>13</sup>C NMR (126

MHz, CDCl<sub>3</sub>)  $\delta$  160.0, 157.9, 156.5 (d, *J* = 193 Hz), 145.3, 145.26, 137.6, 130.2, 129.3, 126.4 (d, *J* = 20 Hz), 121.1 (d, *J* = 36 Hz), 113.1, 80.9, 55.8, 27.9; <sup>19</sup>F NMR (376 MHz, CDCl<sub>3</sub>)  $\delta$ , ppm: -114 (s); **HRMS (ESI)** for C<sub>17</sub>H<sub>20</sub>FN<sub>2</sub>O<sub>4</sub>S<sup>+</sup> (M+H)<sup>+</sup>: calcd. 367.1122, found 367.1122.

***N*-Boc-protected 3-methyl-2-(4-methylphenylsulfonimidoyl)pyridine (1c):**

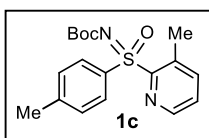

**1c** (831 mg, 48%) as colorless solid. <sup>1</sup>H NMR (400 MHz, CDCl<sub>3</sub>)  $\delta$  8.34 (d, *J* = 4.0 Hz, 1H), 7.97–7.91 (m, 2H), 7.59 (d, *J* = 7.2 Hz, 1H), 7.32–7.24 (m, 3H), 2.72 (s, 3H), 2.38 (s, 3H), 1.31 (s, 9H); <sup>13</sup>C NMR (101 MHz, CDCl<sub>3</sub>)  $\delta$  157.5, 155.3, 146.3, 144.5,

141.6, 134.7, 133.7, 129.4, 129.1, 126.4, 80.2, 27.8, 21.5, 19.1; IR (KBr)  $\nu_{\max}$  2980, 2923, 2847, 1664, 1272, 1152, 1090 cm<sup>-1</sup>; **HRMS (ESI)** for C<sub>18</sub>H<sub>22</sub>N<sub>2</sub>NaO<sub>3</sub>S<sup>+</sup> (M+Na)<sup>+</sup>: calcd. 369.1243, found 369.1258.

***N*-Boc-protected 2-(4-(*tert*-butyl)phenylsulfonimidoyl)-3-methylpyridine (1d):**

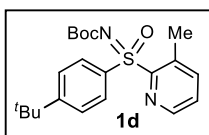

**1d** (1.01 g, 52%) as colorless solid; <sup>1</sup>H NMR (400 MHz, CDCl<sub>3</sub>)  $\delta$  8.40 (d, *J* = 4.4 Hz, 1H), 8.04–7.97 (m, 2H), 7.62 (d, *J* = 7.6 Hz, 1H), 7.56–7.50 (m, 2H), 7.31 (dd, *J* = 7.8, 4.6 Hz, 1H), 2.76 (s, 3H), 1.34 (s, 9H), 1.32 (s, 9H); <sup>13</sup>C NMR (101 MHz,

CDCl<sub>3</sub>)  $\delta$  157.6, 157.4, 155.5, 146.5, 141.6, 134.9, 133.9, 129.1, 126.4, 125.9, 80.3, 35.2, 31.0, 27.9, 19.3; IR (KBr)  $\nu_{\max}$  2968, 1699, 1239, 1223, 1148, 1069, 909 cm<sup>-1</sup>; **HRMS (ESI)** for C<sub>21</sub>H<sub>28</sub>N<sub>2</sub>NaO<sub>3</sub>S<sup>+</sup> (M+Na)<sup>+</sup>: calcd. 411.1713, found 411.1724.

***N*-Boc-protected 2-(4-isopropylphenylsulfonimidoyl)-3-methylpyridine (1e):**

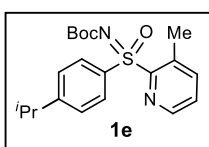

**1e** (1.05 g, 56%) as light red solid; <sup>1</sup>H NMR (400 MHz, CDCl<sub>3</sub>)  $\delta$  8.39 (d, *J* = 4.4 Hz, 1H), 8.03–7.96 (m, 2H), 7.61 (d, *J* = 7.6 Hz, 1H), 7.37 (d, *J* = 8.8 Hz, 2H), 7.30 (dd, *J* = 7.8, 4.6 Hz, 1H), 3.03–2.89 (m, 1H), 2.75 (s, 3H), 1.34 (s, 9H), 1.24 (d, *J* =

7.2 Hz, 6H); <sup>13</sup>C NMR (101 MHz, CDCl<sub>3</sub>)  $\delta$  157.6, 155.5, 155.1, 146.5, 141.6, 134.9, 134.2, 129.4, 127.0, 126.4, 80.3, 34.2, 27.9, 23.5, 19.3; IR (KBr)  $\nu_{\max}$  2970, 1663, 1269, 1245, 1151, 1093, 896 cm<sup>-1</sup>; **HRMS (ESI)** for C<sub>20</sub>H<sub>27</sub>N<sub>2</sub>O<sub>3</sub>S<sup>+</sup> (M+H)<sup>+</sup>: calcd. 375.1737, found 375.1747.

***N*-Boc-protected 2-(3-ethoxyphenylsulfonimidoyl)-3-methylpyridine (1f):**

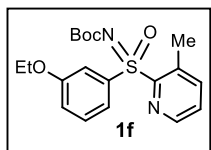

**1f** (866 mg, 46%) as yellow solid;  $^1\text{H}$  NMR (400 MHz,  $\text{CDCl}_3$ )  $\delta$  8.40–8.35 (m, 1H), 7.67–7.55 (m, 3H), 7.44–7.36 (m, 1H), 7.34–7.27 (m, 1H), 7.14–7.07 (m, 1H), 4.05 (q,  $J = 7.07$  Hz, 2H), 2.75 (s, 3H), 1.38 (t,  $J = 7.0$  Hz, 3H), 1.33 (s, 9H);  $^{13}\text{C}$  NMR (101 MHz,  $\text{CDCl}_3$ )  $\delta$  159.1, 157.4, 155.2, 146.4, 141.7, 138.1, 134.9, 129.7, 126.5, 121.3, 120.6, 114.3, 80.3, 64.0, 27.9, 19.2, 14.5; IR (KBr)  $\nu_{\text{max}}$  2980, 2929, 1671, 1598, 1471, 1245, 1154  $\text{cm}^{-1}$ ; **HRMS (ESI)** for  $\text{C}_{19}\text{H}_{24}\text{N}_2\text{NaO}_4\text{S}^+$  ( $\text{M}+\text{Na}$ ) $^+$ : calcd. 399.1349, found 399.1358.

***N*-Boc-protected 3-methyl-2-(3-methylphenylsulfonimidoyl)pyridine (1g):**

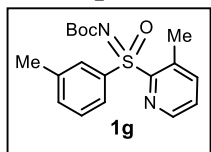

**1g** (883 mg, 51%) as colorless solid;  $^1\text{H}$  NMR (500 MHz,  $\text{CDCl}_3$ )  $\delta$  8.38 (d,  $J = 4.0$  Hz, 1H), 7.93–7.84 (m, 2H), 7.61 (d,  $J = 7.5$  Hz, 1H), 7.42–7.37 (m, 2H), 7.33–7.27 (m, 1H), 2.75 (s, 3H), 2.39 (s, 3H), 1.33 (s, 9H);  $^{13}\text{C}$  NMR (126 MHz,  $\text{CDCl}_3$ )  $\delta$  157.6, 155.2, 146.5, 141.7, 139.1, 136.8, 135.0, 134.4, 129.4, 128.6, 126.5, 126.3, 80.3, 27.9, 21.3, 19.2; IR (KBr)  $\nu_{\text{max}}$  2974, 1671, 1264, 1244, 1145, 1095, 894  $\text{cm}^{-1}$ ; **HRMS (ESI)** for  $\text{C}_{18}\text{H}_{22}\text{N}_2\text{NaO}_3\text{S}^+$  ( $\text{M}+\text{Na}$ ) $^+$ : calcd. 369.1243, found 369.1259.

***N*-Boc-protected 2-(3-chlorophenylsulfonimidoyl)-3-methylpyridine (1h):**

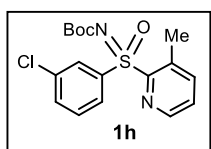

**1h** (899 mg, 49%) as yellow solid;  $^1\text{H}$  NMR (500 MHz,  $\text{CDCl}_3$ )  $\delta$  8.35 (d,  $J = 5.0$  Hz, 1H), 8.12–8.07 (m, 1H), 8.00–7.94 (m, 1H), 7.64 (d,  $J = 8.0$  Hz, 1H), 7.60–7.54 (m, 1H), 7.47 (t,  $J = 8.0$  Hz, 1H), 7.32 (dd,  $J = 7.5$  Hz, 1H), 2.79 (s, 3H), 1.34 (s, 9H);  $^{13}\text{C}$  NMR (126 MHz,  $\text{CDCl}_3$ )  $\delta$  157.2, 154.9, 146.4, 141.8, 139.0, 135.3, 135.1, 133.6, 129.9, 129.4, 127.6, 126.7, 80.7, 27.9, 19.1; IR (KBr)  $\nu_{\text{max}}$  2977, 2926, 1699, 1666, 1271, 1235, 1147  $\text{cm}^{-1}$ ; **HRMS (ESI)** for  $\text{C}_{17}\text{H}_{19}\text{ClN}_2\text{NaO}_3\text{S}^+$  ( $\text{M}+\text{Na}$ ) $^+$ : calcd. 389.0697, found 389.0709.

***N*-Boc-protected 2-(3,5-dimethylphenylsulfonimidoyl)-3-methylpyridine (1i):**

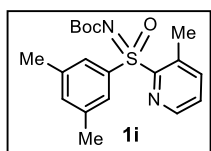

**1i** (1.03 g, 57%) as colorless solid;  $^1\text{H}$  NMR (500 MHz,  $\text{CDCl}_3$ )  $\delta$  8.40 (d,  $J = 4.5$  Hz, 1H), 7.69 (bs, 2H), 7.61 (d,  $J = 7.0$  Hz, 1H), 7.30 (dd,  $J = 7.5, 4.5$  Hz, 1H), 7.20 (bs, 1H), 2.75 (s, 3H), 2.35 (s, 6H), 1.34 (s, 9H);  $^{13}\text{C}$  NMR (126 MHz,  $\text{CDCl}_3$ )  $\delta$  157.7, 155.3, 146.6, 141.7, 138.9, 136.6, 135.4, 135.0, 126.5, 126.4, 80.3, 27.9, 21.2, 19.3; IR (KBr)  $\nu_{\text{max}}$  2977, 2929, 2850, 1741, 1700, 1666, 1273, 1157  $\text{cm}^{-1}$ ; **HRMS (ESI)** for  $\text{C}_{19}\text{H}_{24}\text{N}_2\text{NaO}_3\text{S}^+$  ( $\text{M}+\text{Na}$ ) $^+$ : calcd. 383.1400, found 383.1409.

### ***N*-Boc-protected 3-methyl-2-(naphthalene-2-sulfonimidoyl)pyridine (1j):**

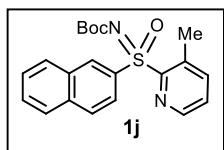

**1j** (1.16 g, 61%) as colorless solid;  $^1\text{H}$  NMR (500 MHz,  $\text{CDCl}_3$ )  $\delta$  8.72 (s, 1H), 8.37–8.32 (m, 1H), 8.06–8.01 (m, 1H), 8.00–7.91 (m, 2H), 7.90–7.86 (m, 1H), 7.67–7.55 (m, 3H), 7.32–7.26 (m, 1H), 2.82 (s, 3H), 1.35 (s, 9H);  $^{13}\text{C}$  NMR (126 MHz,  $\text{CDCl}_3$ )  $\delta$  157.6, 155.5, 146.4, 141.7, 135.2, 135.1, 134.1, 132.1, 131.0, 129.5, 129.2, 128.9, 127.8, 127.4, 126.4, 124.1, 80.4, 27.9, 19.2; IR (KBr)  $\nu_{\text{max}}$  3012, 2970, 2929, 1744, 1662, 1062, 857  $\text{cm}^{-1}$ ; **HRMS (ESI)** for  $\text{C}_{21}\text{H}_{22}\text{N}_2\text{NaO}_3\text{S}^+$  ( $\text{M}+\text{Na}$ ) $^+$ : calcd. 405.1243, found 405.1251.

### ***N*-Boc-protected 2-(2-methylphenylsulfonimidoyl)pyridine (1k):**

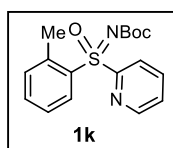

**1k** (864 mg, 52%) as colorless solid.;  $^1\text{H}$  NMR (400 MHz,  $\text{CDCl}_3$ )  $\delta$  8.59 (d,  $J = 4.8$  Hz, 1H), 8.44 (d,  $J = 8.0$  Hz, 1H), 8.37 (d,  $J = 8.0$  Hz, 1H), 7.94 (td,  $J = 7.8, 1.9$  Hz, 1H), 7.52–7.37 (m, 3H), 7.22 (d,  $J = 7.6$  Hz, 1H), 2.42 (s, 3H), 1.30 (s, 9H);  $^{13}\text{C}$  NMR (101 MHz,  $\text{CDCl}_3$ )  $\delta$  157.4, 156.8, 150.1, 138.4, 137.8, 135.0, 133.7, 132.7, 131.4, 126.8, 126.5, 123.8, 80.5, 27.8, 20.5; IR (KBr)  $\nu_{\text{max}}$  2973, 2929, 1666, 1450, 1232, 1142, 752  $\text{cm}^{-1}$ ; **HRMS (ESI)** for  $\text{C}_{17}\text{H}_{20}\text{N}_2\text{NaO}_3\text{S}^+$  ( $\text{M}+\text{Na}$ ) $^+$ : calcd. 355.87, found 355.1087.

### ***N*-Boc-protected 2-(4-fluoro-2-methylphenylsulfonimidoyl)pyridine (1l):**

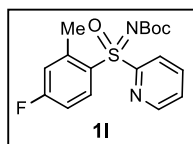

**1l** (823 mg, 47%) as colorless solid.;  $^1\text{H}$  NMR (400 MHz,  $\text{CDCl}_3$ )  $\delta$  8.56 (bd,  $J = 4.8$  Hz, 1H), 8.42–8.32 (m, 2H), 7.94 (td,  $J = 7.8, 1.7$  Hz, 1H), 7.49–7.42 (m, 1H), 7.10–7.01 (m, 1H), 6.91 (dd,  $J = 9.2, 2.4$  Hz, 1H), 2.39 (s, 3H), 1.29 (s, 9H);  $^{13}\text{C}$  NMR (101 MHz,  $\text{CDCl}_3$ )  $\delta$  165.4 (d,  $J = 258$  Hz), 157.2, 156.6, 150.1, 141.8 (d,  $J = 9.1$  Hz), 137.9, 134.3 (d,  $J = 10$  Hz), 130.6, 126.9, 123.6, 119.5 (d,  $J = 22$  Hz), 113.6 (d,  $J = 22$  Hz), 80.5, 27.7, 20.5;  $^{19}\text{F}$  NMR (376 MHz,  $\text{CDCl}_3$ )  $\delta$ , ppm: -104.9 (s). IR (KBr)  $\nu_{\text{max}}$  2981, 1660, 1576, 1276, 1144, 1118, 856  $\text{cm}^{-1}$ ; **HRMS (ESI)** for  $\text{C}_{17}\text{H}_{19}\text{FN}_2\text{NaO}_3\text{S}^+$  ( $\text{M}+\text{Na}$ ) $^+$ : calcd. 373.0993, found 373.1001.

### ***N*-Boc-protected 3-methyl-2-(thiophene-2-sulfonimidoyl)pyridine (1m):**

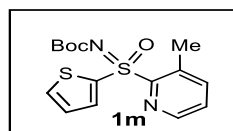

**1m** (880 mg, 52%) as colorless solid.;  $^1\text{H}$  NMR (500 MHz,  $\text{CDCl}_3$ )  $\delta$  8.39 (bd,  $J = 4.5$  Hz, 1H), 7.81–7.73 (m, 2H), 7.63 (d,  $J = 8.0$  Hz, 1H), 7.32 (dd,  $J = 7.5, 4.5$  Hz, 1H), 7.11 (bt,  $J = 4.25$  Hz, 1H), 2.77 (s, 3H), 1.33 (s, 9H);  $^{13}\text{C}$  NMR (101 MHz,  $\text{CDCl}_3$ )  $\delta$  157.1, 155.4, 146.5, 141.8, 137.3, 135.7, 135.4, 134.7, 127.6, 126.7, 80.6, 27.8, 19.2; **HRMS (ESI)** for  $\text{C}_{15}\text{H}_{19}\text{N}_2\text{O}_3\text{S}_2^+$  ( $\text{M}+\text{H}$ ) $^+$ : calcd. 339.0832, found 339.0833.

## **2.2 Synthesis of chiral ligands (GP-2):<sup>2</sup>**

All mono protected amino acids ligands **L1–L8** and **L11** were purchased from commercial sources or synthesized following the known procedures.<sup>2</sup>

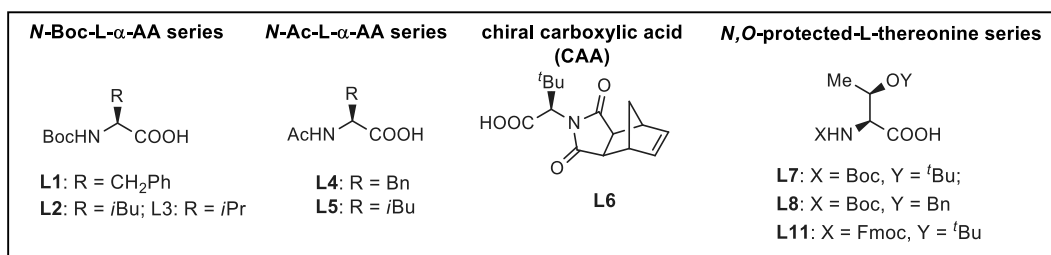

### Synthesis of L9 and L10 ligands:

To a solution of L-Boc-Thr-OH (5.0 g, 22 mmol) in DMF (80 mL) was added sodium hydride (55% dispersion in mineral oil, 2.1 g, 48 mmol) at  $-20\text{ }^{\circ}\text{C}$ . After being stirred for 2 h, benzyl bromide derivatives (24 mmol) was added to the reaction. The resulting mixture was stirred at room temperature for 5 h and then quenched with saturated NH<sub>4</sub>Cl solution. The reaction mixture was poured into water (100 mL) and washed with diethyl ether ( $2 \times 25\text{ mL}$ ). The aqueous solution was acidified with citric acid and extracted with EtOAc ( $3 \times 50\text{ mL}$ ). The combined extracts were washed with brine ( $3 \times 30\text{ mL}$ ), and then dried over anhydrous Na<sub>2</sub>SO<sub>4</sub>. The solution was concentrated in reduced pressure and was purified by flash chromatography using a mixture of hexane and EtOAc (2 : 1 v/v) to give a thick colorless syrupy liquid.

#### 2-((*tert*-Butoxycarbonyl)amino)-3-((3,5-difluorobenzyl)oxy)butanoic acid (L9):

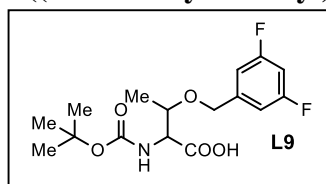

**L9:** 5.2 g, 68% yield, colorless viscous liquid, <sup>1</sup>H NMR (500 MHz, CDCl<sub>3</sub>)  $\delta$  9.64 (s, 1H), 6.82–6.72 (m, 2H), 6.64 (t,  $J = 9.0\text{ Hz}$ , 1H), 5.33 (d,  $J = 9.5\text{ Hz}$ , 1H), 4.51 (d,  $J = 12.5\text{ Hz}$ , 1H), 4.41–4.33 (m, 1H), 4.19–4.13 (m, 1H), 1.43 (s, 9H), 1.25 (d,  $J = 6.5\text{ Hz}$ , 3H); <sup>13</sup>C NMR (101 MHz, CDCl<sub>3</sub>)  $\delta$  175.6, 162.9 (dd,  $J = 249, 13\text{ Hz}$ ), 156.3, 142.0 (t,  $J = 8.6\text{ Hz}$ ), 109.8 (dd,  $J = 19, 6.5\text{ Hz}$ ), 102.8 (t,  $J = 25\text{ Hz}$ ), 80.3, 75.2, 69.7, 57.9, 28.2, 16.1; <sup>19</sup>F NMR (471 MHz, CDCl<sub>3</sub>)  $\delta$   $-109.8$  (s). IR (KBr)  $\nu_{\text{max}}$  2979, 1712, 1627, 1597, 1160, 1115, 847 cm<sup>-1</sup>; HRMS (ESI) for C<sub>16</sub>H<sub>21</sub>F<sub>2</sub>NNaO<sub>5</sub><sup>+</sup> (M+Na)<sup>+</sup>: calcd. 368.1280, 368.1288.

#### 2-((*tert*-Butoxycarbonyl)amino)-3-((3,5-dimethoxybenzyl)oxy)butanoic acid (L10):

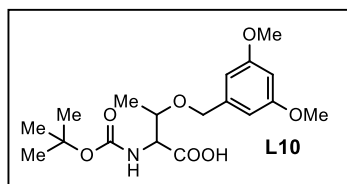

**L10:** 5.5 g, 68% yield, brown solid, <sup>1</sup>H NMR (500 MHz, CDCl<sub>3</sub>)  $\delta$  6.42 (bd,  $J = 2.0\text{ Hz}$ , 2H), 6.35 (s, 1H), 5.36 (d,  $J = 9.0\text{ Hz}$ , 1H), 4.50 (d,  $J = 12.0\text{ Hz}$ , 1H), 4.38 (d,  $J = 12.0\text{ Hz}$ , 1H), 4.33 (d,  $J = 9.5\text{ Hz}$ , 1H), 4.20–4.15 (m, 1H), 3.74 (s, 6H), 1.44 (s, 9H), 1.24 (d,  $J = 5.2\text{ Hz}$ , 3H); <sup>13</sup>C NMR (101 MHz, CDCl<sub>3</sub>)  $\delta$  175.2, 160.7, 156.2, 140.1, 105.4, 99.7, 80.1, 74.5, 71.0, 58.0, 55.3, 28.3, 16.2; IR (KBr)  $\nu_{\text{max}}$  3433, 2936, 1680, 1597, 1519, 1152, 1053 cm<sup>-1</sup>; HRMS (ESI) for C<sub>18</sub>H<sub>27</sub>NNaO<sub>7</sub><sup>+</sup> (M+Na)<sup>+</sup>: calcd. 392.1680, found 392.1689.

## 2.3 Optimization of reaction conditions for C–H alkenylative kinetic resolution:

**Table S1. Ligands screening**<sup>a</sup>

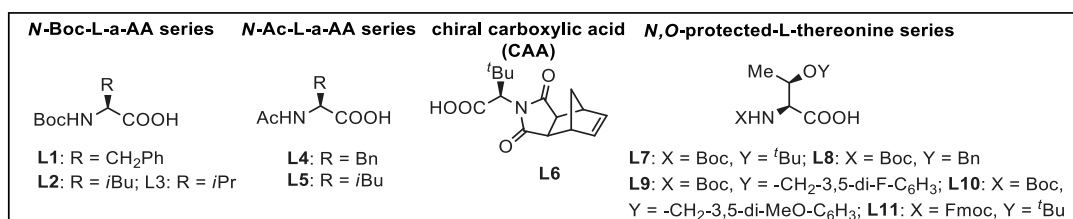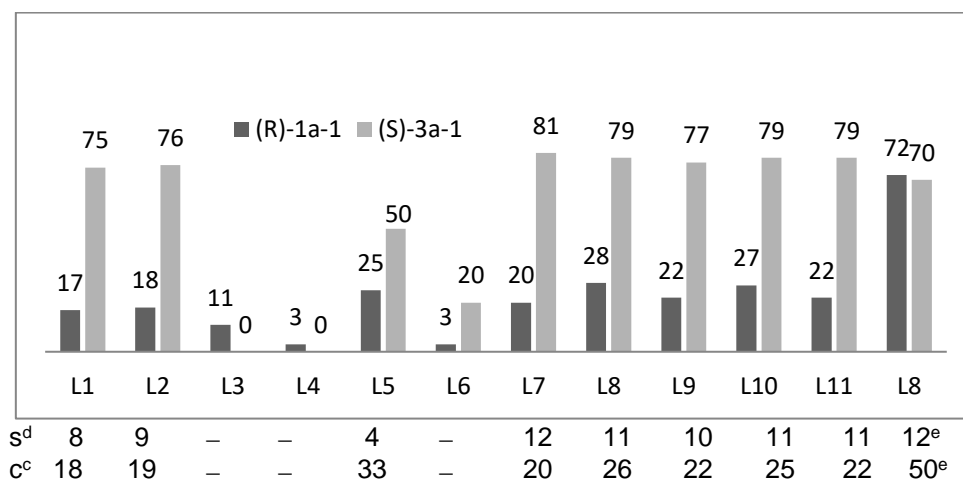

<sup>a</sup>Reaction conditions: *rac*-1a-1 (0.1 mmol), ethyl acrylate **2a** (0.6 equiv), Pd(OAc)<sub>2</sub> (10 mol%), ligand (30 mol%), Ag<sub>2</sub>CO<sub>3</sub> (2.0 equiv), 1,2-DCE (1.0 mL), N<sub>2</sub>, 75 °C, 3 days. <sup>b</sup>Calculated conversion, C = eeSM/(eeSM + eePR). <sup>c</sup>Determined by chiral HPLC analysis. <sup>d</sup>Selectivity factor (*s*) = ln[(1 - C)(1 - eeSM)]/ln[(1 - C)(1 + eeSM)]. <sup>e</sup>Ethyl acrylate (2.0 equiv) was used.

**Table S2. Solvent screening**<sup>a</sup>

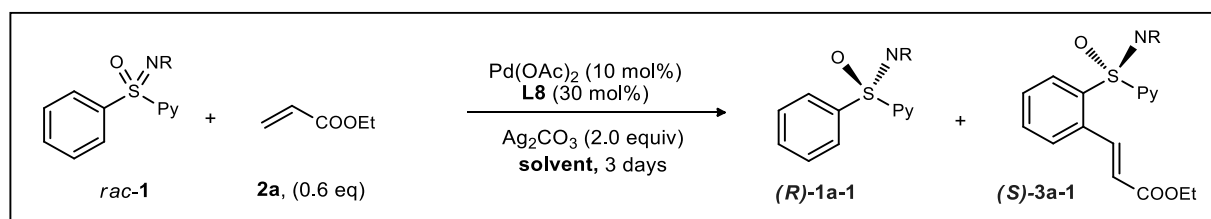

| Entry | solvent               | Conversion <sup>b</sup> | ee [%] <sup>c</sup> |                   | <i>s</i> <sup>d</sup> |
|-------|-----------------------|-------------------------|---------------------|-------------------|-----------------------|
|       |                       |                         | ( <i>R</i> )-1a-1   | ( <i>S</i> )-3a-1 |                       |
| 1     | THF                   | trace                   | –                   | –                 | –                     |
| 2     | CH <sub>3</sub> CN    | trace                   | –                   | –                 | –                     |
| 3     | DIOXANE               | trace                   | –                   | –                 | –                     |
| 4     | HFIP                  | trace                   | –                   | –                 | –                     |
| 5     | Tol                   | 12.76                   | 12                  | 82                | 11                    |
| 6     | TFT                   | 24.78                   | 28                  | 85                | 16                    |
| 7     | 2-chloro toluene      | 16.33                   | 16                  | 82                | 12                    |
| 8     | 3-methoxy anisole     | 27.27                   | 30                  | 80                | 12                    |
| 9     | 1,2-dimethoxy propane | 9.9                     | 09                  | 82                | 11                    |
| 10    | 4-Cl-TFT              | 17                      | 17                  | 83                | 13                    |
| 11    | TFE                   | trace                   | –                   | –                 | –                     |
| 12    | 2-methoxy propen      | trace                   | –                   | –                 | –                     |



|    |                  |       |    |    |    |
|----|------------------|-------|----|----|----|
| 13 | 2-methyl anisole | 20.75 | 22 | 84 | 14 |
|----|------------------|-------|----|----|----|

<sup>a</sup>Reaction conditions: **rac-1a-1** (0.1 mmol), ethyl acrylate **2a** (0.6 equiv), Pd(OAc)<sub>2</sub> (10 mol%), **L8** (30 mol%), Ag<sub>2</sub>CO<sub>3</sub> (2.0 equiv), solvent (1.0 mL), N<sub>2</sub>, 75 °C, 3 days. <sup>b</sup>Calculated conversion, C = eeSM/(eeSM + eePR). <sup>c</sup>Determined by chiral HPLC analysis. <sup>d</sup>Selectivity factor (*s*) = ln[(1 - C)(1 - eeSM)]/ln[(1 - C)(1 + eeSM)]. <sup>e</sup>Ethyl acrylate (2.0 equiv) was used.

**Table S3. Additive screening** <sup>a</sup>

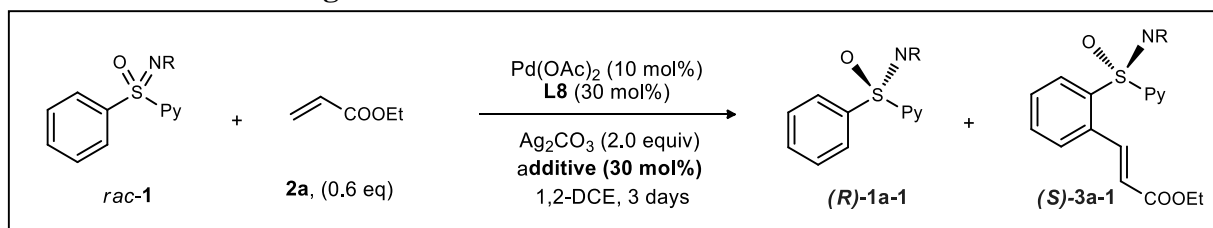

| Entry | Additive         | Conversion <sup>b</sup> | ee [%] <sup>c</sup> |                   | <i>s</i> <sup>d</sup> |
|-------|------------------|-------------------------|---------------------|-------------------|-----------------------|
|       |                  |                         | ( <i>R</i> )-1a-1   | ( <i>S</i> )-3a-1 |                       |
| 1     | BQ               | 18                      | 17                  | 78                | 10                    |
| 2     | 2-chloro BQ      | 39                      | 50                  | 77                | 13                    |
| 3     | 2, 5-dichloro BQ | 35                      | 40                  | 75                | 10                    |

<sup>a</sup>Reaction conditions: **rac-1a-1** (0.1 mmol), ethyl acrylate **2a** (0.6 equiv), Pd(OAc)<sub>2</sub> (10 mol%), **L8** (30 mol%), Ag<sub>2</sub>CO<sub>3</sub> (2.0 equiv), additives (0.3 equiv), 1,2-DCE (1.0 mL), N<sub>2</sub>, 75 °C, 3 days. <sup>b</sup>Calculated conversion, C = eeSM/(eeSM + eePR). <sup>c</sup>Determined by chiral HPLC analysis. <sup>d</sup>Selectivity factor (*s*) = ln[(1 - C)(1 - eeSM)]/ln[(1 - C)(1 + eeSM)].

**Table S4. Directing group screening** <sup>a</sup>

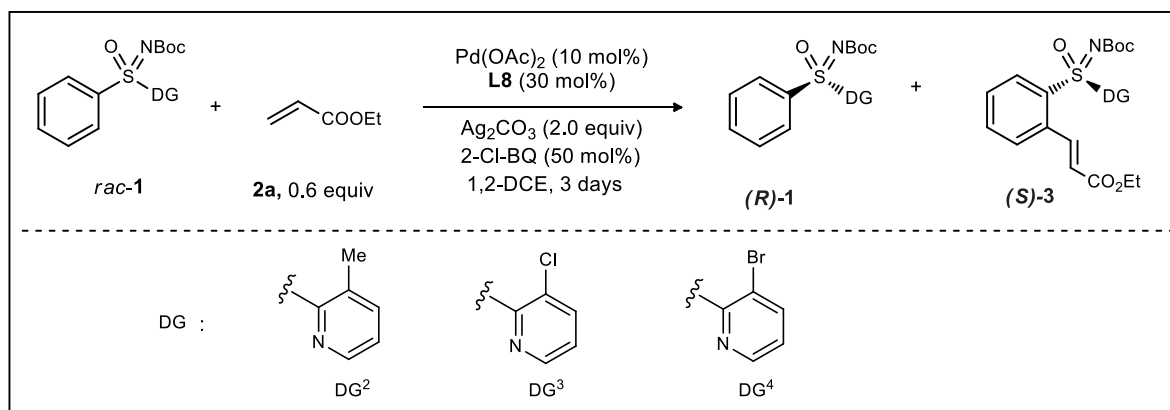

| Entry            | DG              | Conversion <sup>b</sup> | ee [%] <sup>c</sup> |                 | <i>s</i> <sup>d</sup> |
|------------------|-----------------|-------------------------|---------------------|-----------------|-----------------------|
|                  |                 |                         | ( <i>R</i> )-1a     | ( <i>S</i> )-3a |                       |
| 1                | DG <sup>2</sup> | 17                      | 20                  | 96              | 58                    |
| 2                | DG <sup>3</sup> | nr                      | —                   | —               | —                     |
| 3                | DG <sup>4</sup> | nr                      | —                   | —               | —                     |
| 4 <sup>e</sup>   | DG <sup>2</sup> | 22                      | 27                  | 95              | 48                    |
| 5 <sup>f</sup>   | DG <sup>2</sup> | 27                      | 35                  | 94              | 44                    |
| 6 <sup>f,g</sup> | DG <sup>2</sup> | 34                      | 50                  | 96              | 85                    |

<sup>[a]</sup>Reaction conditions: **rac-1** (0.1 mmol), ethyl acrylate **2a** (0.6 equiv), Pd(OAc)<sub>2</sub> (10 mol%), **L8** (30 mol%), Ag<sub>2</sub>CO<sub>3</sub> (2.0 equiv), additives (0.3 equiv), 1,2-DCE (1.0 mL), N<sub>2</sub>, 75 °C, 3 days. <sup>[b]</sup>Calculated conversion, C = eeSM/(eeSM + eePR).

<sup>c</sup>Determined by chiral HPLC analysis. <sup>d</sup>Selectivity factor ( $s$ ) =  $\ln[(1 - C)(1 - eeSM)]/\ln[(1 - C)(1 + eeSM)]$ . <sup>e</sup>Ethyl acrylate (2.0 equiv) was used. <sup>f</sup>Methyl acrylate instead ethyl acrylate. <sup>g</sup>2-Cl-BQ (50 mol%) was used.

### *N*-Boc-protected (S,E)-methyl 3-(2-(4-methylpyridine-2-sulfonimidoyl)phenyl)acrylate (**3s**):

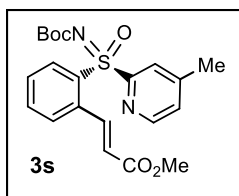

**3s**: <sup>1</sup>H NMR (500 MHz, CDCl<sub>3</sub>)  $\delta$  8.45–8.37 (m, 3H), 8.33 (bs, 1H), 7.64–7.55 (m, 2H), 7.51 (d,  $J$  = 7.0 Hz, 1H), 7.23 (bd,  $J$  = 4.5 Hz, 1H), 6.03 (d,  $J$  = 15.5 Hz, 1H), 3.77 (s, 3H), 2.45 (s, 3H), 1.31 (s, 9H); <sup>13</sup>C NMR (126 MHz, CDCl<sub>3</sub>)  $\delta$  166.1, 157.1, 156.7, 150.0, 149.9, 141.4, 135.9, 135.2, 133.8, 131.3, 129.8, 128.9, 127.7, 124.9, 122.2, 80.6, 51.8, 27.9, 21.2; **HRMS (ESI)** for C<sub>21</sub>H<sub>25</sub>N<sub>2</sub>O<sub>5</sub>S<sup>+</sup> (M+H)<sup>+</sup>: calcd. 417.1479, found 417.1478.

### *N*-Boc-protected (S,E)-methyl 3-(2-(5-chloropyridine-2-sulfonimidoyl)phenyl)acrylate (**3t**):

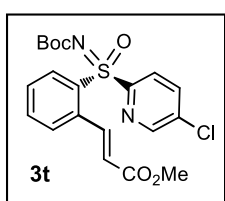

**3t**: <sup>1</sup>H NMR (500 MHz, CDCl<sub>3</sub>)  $\delta$  8.51 (bd,  $J$  = 2.0 Hz, 1H), 8.48–8.37 (m, 3H), 7.91 (dd,  $J$  = 8.5, 2.0 Hz, 1H), 7.66–7.57 (m, 2H), 7.57–7.53 (m, 1H), 6.11 (d,  $J$  = 16 Hz, 1H), 3.79 (s, 3H), 1.33 (s, 9H); <sup>13</sup>C NMR (126 MHz, CDCl<sub>3</sub>)  $\delta$  166.1, 156.6, 155.3, 149.2, 141.1, 137.5, 136.0, 135.4, 135.3, 134.2, 131.5, 130.0, 129.1, 125.1, 122.5, 81.0, 51.9, 27.9; **HRMS (ESI)** for C<sub>20</sub>H<sub>22</sub>ClN<sub>2</sub>O<sub>5</sub>S<sup>+</sup> (M+H)<sup>+</sup>: calcd. 437.0932, found 437.0933.

## 2.4 Optimization of reaction conditions (arylation):

**Table S5. Oxidant screening<sup>a</sup>**

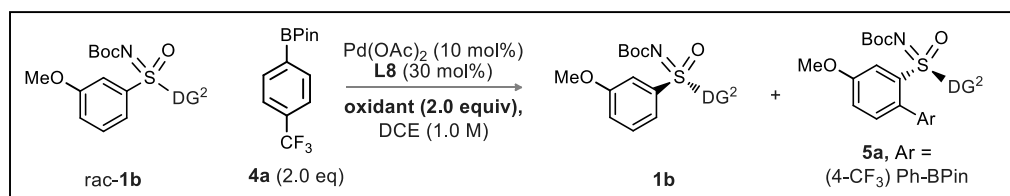

| Entry          | Oxidant                         | Conversion (c) <sup>b</sup> | <i>ee</i> [%] <sup>c</sup> |                         | <i>s</i> <sup>d</sup> |
|----------------|---------------------------------|-----------------------------|----------------------------|-------------------------|-----------------------|
|                |                                 |                             | ( <i>R</i> )- <b>1b</b>    | ( <i>S</i> )- <b>5a</b> |                       |
| 1              | Ag <sub>2</sub> CO <sub>3</sub> | 17.54                       | 20                         | 94                      | 39                    |
| 2              | Ag <sub>2</sub> O               | 47.56                       | 78                         | 86                      | 31                    |
| 3              | AgOAc                           | 11.76                       | 12                         | 90                      | 21                    |
| 4 <sup>e</sup> | Ag <sub>2</sub> O               | 43.21                       | 70                         | 92                      | 50                    |

<sup>a</sup>Reaction conditions: *rac*-**1b** (0.1 mmol), **4a** (2.0 equiv), Pd(OAc)<sub>2</sub> (10 mol%), **L8** (30 mol%), oxidant (2.0 equiv), 2-Cl-BQ (0.5 equiv), 1,2-DCE (1.0 mL), N<sub>2</sub>, 75 °C, 3 days. <sup>b</sup>Calculated conversion, C = eeSM/(eeSM + eePR). <sup>c</sup>Determined by chiral HPLC analysis. <sup>d</sup>Selectivity factor ( $s$ ) =  $\ln[(1 - C)(1 - eeSM)]/\ln[(1 - C)(1 + eeSM)]$ . <sup>e</sup>Reaction is performed in 60 °C.

**Table S6. Solvent screening:**

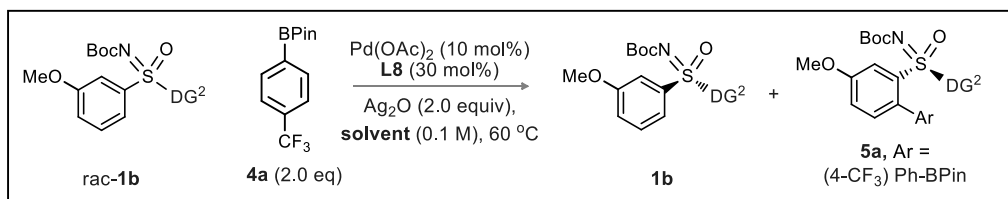

| Entry | Solvent           | Conversion (c) <sup>b</sup> | <i>ee</i> [%] <sup>c</sup> |                         | <i>s</i> <sup>d</sup> |
|-------|-------------------|-----------------------------|----------------------------|-------------------------|-----------------------|
|       |                   |                             | ( <i>R</i> )- <b>1b</b>    | ( <i>S</i> )- <b>5a</b> |                       |
| 1     | TFT               | 41.25                       | 66                         | 94                      | 64                    |
| 2     | THF               | 31.43                       | 44                         | 96                      | 75                    |
| 3     | <i>t</i> -Amyl-OH | 36.0                        | 54                         | 96                      | 84                    |

<sup>a</sup>Reaction conditions: *rac-1b* (0.1 mmol), **4a** (2.0 equiv), Pd(OAc)<sub>2</sub> (10 mol%), **L8** (30 mol%), Ag<sub>2</sub>O (2.0 equiv), 2-Cl-BQ (0.5 equiv), solvent (1.0 mL), N<sub>2</sub>, 60 °C, 3 days. <sup>b</sup>Calculated conversion, C = eeSM/(eeSM + eePR). <sup>c</sup>Determined by chiral HPLC analysis. <sup>d</sup>Selectivity factor (*s*) = ln[(1 - C)(1 - eeSM)]/ln[(1 - C)(1 + eeSM)].

**Table S7. Screening of ligand loading<sup>a</sup>**

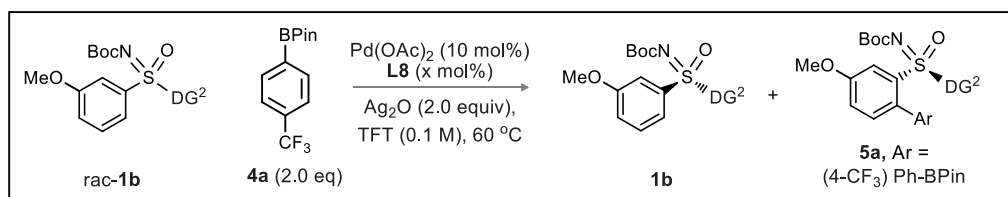

| Entry | Ligand loading (x mol%) | Conversion (c) <sup>b</sup> | <i>ee</i> [%] <sup>c</sup> |                         | <i>s</i> <sup>d</sup> |
|-------|-------------------------|-----------------------------|----------------------------|-------------------------|-----------------------|
|       |                         |                             | ( <i>R</i> )- <b>1b</b>    | ( <i>S</i> )- <b>5a</b> |                       |
| 1     | 10 mol%                 | 40.51                       | 64                         | 94                      | 62                    |
| 2     | 15 mol%                 | 41.97                       | 68                         | 94                      | 66                    |
| 3     | 20 mol%                 | 45.98                       | 80                         | 94                      | 79                    |
| 4     | 40 mol%                 | 39.74                       | 62                         | 94                      | 61                    |

<sup>a</sup>Reaction conditions: *rac-1b* (0.1 mmol), **4a** (2.0 equiv), Pd(OAc)<sub>2</sub> (10 mol%), **L8** (x mol%), Ag<sub>2</sub>O (2.0 equiv), 2-Cl-BQ (0.5 equiv), TFT (1.0 mL), N<sub>2</sub>, 60 °C, 3 days. <sup>b</sup>Calculated conversion, C = eeSM/(eeSM + eePR). <sup>c</sup>Determined by chiral HPLC analysis. <sup>d</sup>Selectivity factor (*s*) = ln[(1 - C)(1 - eeSM)]/ln[(1 - C)(1 + eeSM)].

**Table S8. Screening of solvent loading<sup>a</sup>**

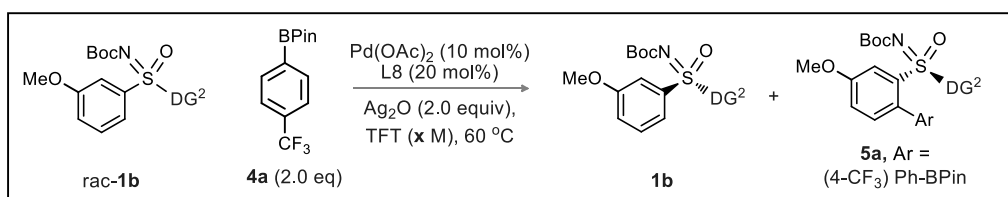

| Entry | Molarity | Conversion | <i>ee</i> [%] <sup>c</sup> |
|-------|----------|------------|----------------------------|
|-------|----------|------------|----------------------------|

|   |         | (c) <sup>b</sup> | (R)-1b | (S)-5a | s <sup>d</sup> |
|---|---------|------------------|--------|--------|----------------|
| 1 | 0.2 M   | 40.51            | 64     | 94     | 62             |
| 2 | 0.13 M  | 41.25            | 66     | 94     | 64             |
| 3 | 0.067 M | 48.35            | 88     | 94     | 95             |
| 4 | 0.05 M  | 47.19            | 84     | 94     | 86             |

<sup>a</sup>Reaction conditions: *rac*-1b (0.1 mmol), 4a (2.0 equiv), Pd(OAc)<sub>2</sub> (10 mol%), L8 (20 mol%), Ag<sub>2</sub>O (2.0 equiv), 2-Cl-BQ (0.5 equiv), TFT (x M), N<sub>2</sub>, 60 °C, 3 days. <sup>b</sup>Calculated conversion, C = eeSM/(eeSM + eePR). <sup>c</sup>Determined by chiral HPLC analysis. <sup>d</sup>Selectivity factor (s) = ln[(1 - C)(1 - eeSM)]/ln[(1 - C)(1 + eeSM)].

## 2.5 General procedures for kinetic resolution via Pd-catalyzed C(sp<sup>2</sup>)-H olefination (GP-3):

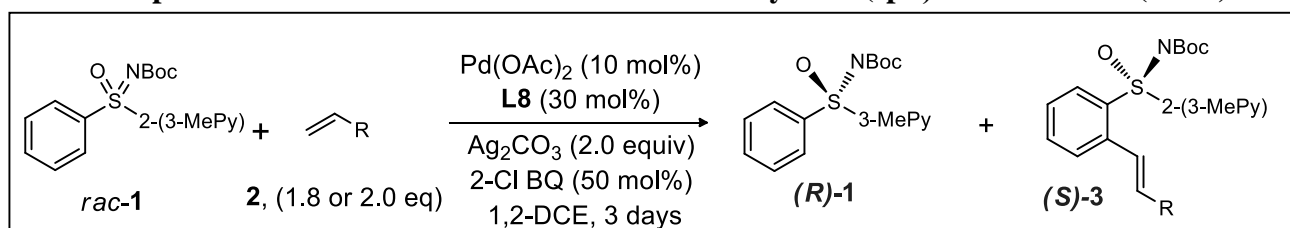

To an oven-dried 10 mL screw-capped vial was added Pd(OAc)<sub>2</sub> (0.025 mmol) L8 (0.075 mmol) and 1,2-DCE (2.5 mL). The mixture was stirred for 2 h at 50 °C. The reaction mixture was cooled to rt. The substrate (0.25 mmol), olefin (0.45–0.5 mmol), 2-chlorobenzoquinone (0.075–0.125 mmol), Ag<sub>2</sub>CO<sub>3</sub> (0.5 mmol) was then added. The mixture was stirred for 48–72 h at 70 °C. The resulting mixture was then cooled to rt and filtered through a small pad of Celite and concentrated in vacuo. The residue was purified by preparative TLC using hexane/EtOAc as the eluent to afford the chiral product.

### N-Boc-protected (*S,E*)-methyl 3-(2-(3-methylpyridine-2-sulfonimidoyl)phenyl)acrylate (3b):

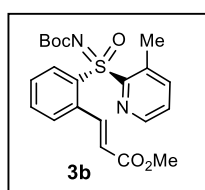

**3b**: 27 mg, 26% yield, 96% ee, colorless solid, [ $\alpha$ ]<sub>D</sub><sup>25</sup> = +37.5 (c = 0.01, CHCl<sub>3</sub>); <sup>1</sup>H NMR (500 MHz, CDCl<sub>3</sub>)  $\delta$  8.40 (d, *J* = 8.0 Hz, 1H), 8.31–8.23 (m, 2H), 7.65 (t, *J* = 7.5 Hz, 2H), 7.60 (t, *J* = 8.0 Hz, 2H), 7.31 (dd, *J* = 7.5, 5.0 Hz, 1H), 6.11 (d, *J* = 15.5 Hz, 1H), 3.74 (s, 3H), 2.86 (s, 3H), 1.33 (s, 9H); <sup>13</sup>C NMR (126 MHz, CDCl<sub>3</sub>)  $\delta$  166.2,

157.0, 155.0, 146.0, 141.8, 141.7, 136.3, 136.2, 135.8, 133.7, 131.0, 129.6, 128.8, 126.6, 122.0, 80.5, 51.8, 27.9, 19.0; IR (KBr)  $\nu_{\text{max}}$  3021, 2926, 2853, 1738, 1367, 1216 cm<sup>-1</sup>; HRMS (ESI) for C<sub>21</sub>H<sub>25</sub>N<sub>2</sub>O<sub>5</sub>S<sup>+</sup> (M+H)<sup>+</sup>: calcd. 417.1479, found 417.1487; HPLC condition: Daicel IG-3, *i*-PrOH, Flow rate = 0.3 mL/min, UV = 254 nm, t<sub>R</sub> = 18.6 min (major) and t<sub>R</sub> = 22.8 min (minor).

***N*-Boc-protected (*R*)-3-methyl-2-(phenylsulfonimidoyl)pyridine (**1a**):**

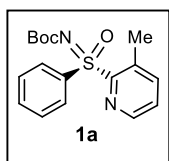

**1a:** 42 mg, 51% yield, 52% ee;  $[\alpha]_{\text{D}}^{25} = -17.5$  ( $c = 0.016$ ,  $\text{CHCl}_3$ ); **HPLC condition:** Daicel IG-3, *i*-PrOH, Flow rate = 0.3 mL/min, UV = 254 nm,  $t_{\text{R}} = 22.0$  min (major) and  $t_{\text{R}} = 20.3$  min (minor).

***N*-Boc-protected (*S,E*)-methyl 3-(4-methoxy-2-(3-methylpyridine-2-sulfonimidoyl)phenyl) acrylate (**3c**):**

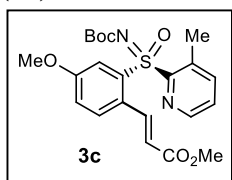

**3c:** 39 mg, 35% yield, 97% ee, colorless solid,  $[\alpha]_{\text{D}}^{25} = +55.3$  ( $c = 0.13$ ,  $\text{CHCl}_3$ ); **<sup>1</sup>H NMR (500 MHz, CDCl<sub>3</sub>)**  $\delta$  8.25 (dd,  $J = 4.75, 1.25$  Hz, 1H), 8.19 (d,  $J = 16.0$ , 1H), 7.90 (d,  $J = 3.0$  Hz, 1H), 7.66 (dd,  $J = 7.75, 0.75$  Hz, 1H), 7.55 (d,  $J = 8.5$  Hz, 1H), 7.31 (dd,  $J = 7.75, 4.75$  Hz, 1H), 7.13 (dd,  $J = 8.5, 2.5$  Hz, 1H), 6.05 (d,  $J = 16.0$  Hz, 1H), 3.90 (s, 3H), 3.71 (s, 3H), 2.85 (s, 3H), 1.33 (s, 9H); **<sup>13</sup>C NMR (126 MHz, CDCl<sub>3</sub>)**  $\delta$  166.4, 160.5, 157.0, 154.9, 146.0, 141.7, 141.2, 137.5, 135.6, 130.0, 128.1, 126.6, 120.0, 119.9, 115.6, 80.5, 55.8, 51.6, 27.9, 18.9; IR (KBr)  $\nu_{\text{max}}$  2970, 2923, 1720, 1272, 1232, 1155, 1035  $\text{cm}^{-1}$ ; **HRMS (ESI)** for  $\text{C}_{22}\text{H}_{26}\text{N}_2\text{NaO}_6\text{S}^+$  ( $\text{M}+\text{Na}$ )<sup>+</sup>: calcd. 469.1404, found 469.1413; **HPLC condition:** Phenomenex Chiralpak cellulose-2, *n*-hexane/*i*-PrOH = 60/40, Flow rate = 0.4 mL/min, UV = 254 nm,  $t_{\text{R}} = 57.7$  min (major) and  $t_{\text{R}} = 50.9$  min (minor).

***N*-Boc-protected (*R*)-2-(3-methoxyphenylsulfonimidoyl)-3-methylpyridine (**1b**):**

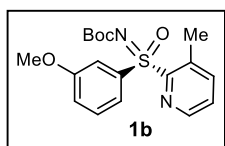

**1b:** 42 mg, 46% yield, 71% ee  $[\alpha]_{\text{D}}^{25} = -41.5$  ( $c = 0.378$ ,  $\text{CHCl}_3$ ); **HPLC condition:** Daicel IG-3, MeOH, Flow rate = 0.5 mL/min, UV = 254 nm,  $t_{\text{R}} = 14.5$  min (major) and  $t_{\text{R}} = 10.2$  min (minor).

***N*-Boc-protected (*S,E*)-ethyl 3-(4-methoxy-2-(3-methylpyridine-2-sulfonimidoyl)phenyl) acrylate (**3d**):**

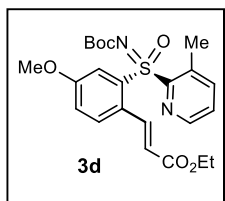

**3d:** 38 mg, 33% yield, 90% ee, colorless viscous liquid,  $[\alpha]_{\text{D}}^{25} = +25.2$  ( $c = 0.138$ ,  $\text{CHCl}_3$ ); **<sup>1</sup>H NMR (400 MHz, CDCl<sub>3</sub>)**  $\delta$  8.27 (d,  $J = 4.8$  Hz, 1H), 8.17 (d,  $J = 15.6$  Hz, 1H), 7.94 (d,  $J = 2.8$  Hz, 1H), 7.66 (d,  $J = 8.0$  Hz, 1H), 7.54 (d,  $J = 8.4$  Hz, 1H), 7.34–7.28 (m, 1H), 7.17–7.10 (m, 1H), 6.04 (d,  $J = 15.6$  Hz, 1H), 4.19 (q,  $J = 7.2$  Hz, 2H), 3.92 (s, 3H), 2.87 (s, 3H), 1.35 (s, 9H), 1.28 (t,  $J = 7.0$  Hz, 3H); **<sup>13</sup>C NMR (101 MHz, CDCl<sub>3</sub>)**  $\delta$  166.0, 160.4, 157.0, 155.0, 146.1, 141.6, 140.8, 137.6, 135.8, 130.0, 128.1, 126.6, 120.5, 119.9, 115.5, 80.5, 60.4, 55.9, 27.9, 19.1, 14.3; IR (KBr)  $\nu_{\text{max}}$  2969, 1738, 1366, 1229, 1216, 1156  $\text{cm}^{-1}$ ; **HRMS (ESI)** for  $\text{C}_{23}\text{H}_{28}\text{N}_2\text{NaO}_6\text{S}^+$  ( $\text{M}+\text{Na}$ )<sup>+</sup>: calcd. 483.1560, found 483.1571; **HPLC condition:** Amylose-C Neo, *n*-hexane/*i*-PrOH (0.1% DEA) = 65/35, Flow rate = 0.5 mL/min, UV = 254 nm,  $t_{\text{R}} = 13.2$  min (major) and  $t_{\text{R}} = 18.2$  min (minor).

***N*-Boc-protected (*R*)-2-(3-methoxyphenylsulfonimidoyl)-3-methylpyridine (**1b**):**

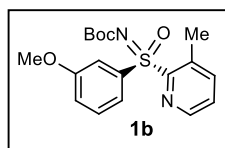

**1b**: 40 mg, 45% yield, 74% ee;  $[\alpha]_D^{25} = -29.8$  ( $c = 0.12$ ,  $\text{CHCl}_3$ ); **HPLC condition**: Daicel IG-3, MeOH, Flow rate = 0.5 mL/min, UV = 254 nm,  $t_R = 14.4$  min (major) and  $t_R = 10.0$  min (minor).

***N*-Boc-protected (*S,E*)-4-(4-methoxy-2-(3-methylpyridine-2-sulfonimidoyl)phenyl)but-3-en-2-one (**3e**):**

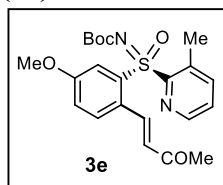

**3e**: 37 mg, 35% yield, 91% ee, colorless solid,  $[\alpha]_D^{25} = +97$  ( $c = 0.06$ ,  $\text{CHCl}_3$ );  **$^1\text{H}$  NMR (500 MHz,  $\text{CDCl}_3$ )**  $\delta$  8.46 (d,  $J = 16.5$ , 1H), 8.33 (dd,  $J = 4.5$ , 1.0 Hz, 1H), 7.87 (d,  $J = 3.0$  Hz, 1H), 7.67 (d,  $J = 7.0$  Hz, 1H), 7.63 (d,  $J = 8.5$  Hz, 1H), 7.36 (dd,  $J = 8.0$ , 4.5 Hz, 1H), 7.15 (dd,  $J = 8.75$ , 2.75 Hz, 1H), 6.30 (d,  $J = 16.5$  Hz, 1H), 3.91 (s, 3H), 2.75 (s, 3H), 2.35 (s, 3H), 1.34 (s, 9H);  **$^{13}\text{C}$  NMR (126 MHz,  $\text{CDCl}_3$ )**  $\delta$  199.1, 160.8, 157.0, 154.8, 145.9, 142.0, 141.3, 137.5, 135.3, 129.9, 129.4, 128.1, 127.0, 119.8, 115.9, 80.6, 55.9, 27.9, 26.1, 19.0; IR (KBr)  $\nu_{\text{max}}$  2974, 2923, 2363, 1738, 1668, 1366, 1232, 1152  $\text{cm}^{-1}$ ; **HRMS (ESI)** for  $\text{C}_{22}\text{H}_{27}\text{N}_2\text{O}_5\text{S}^+$  ( $\text{M}+\text{H}$ ) $^+$ : calcd. 431.1635, found 431.1641; **HPLC condition**: Daicel OT (+), n-hexane/i-PrOH = 70/30, Flow rate = 0.2 mL/min, UV = 254 nm,  $t_R = 45.1$  min (major) and  $t_R = 39.9$  min (minor).

***N*-Boc-protected (*R*)-2-(3-methoxyphenylsulfonimidoyl)-3-methylpyridine(**1b**):**

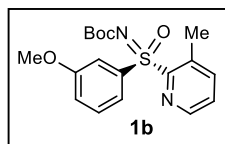

**1b**: 39 mg, 43% yield, 67 % ee;  $[\alpha]_D^{25} = -28.0$  ( $c = 0.114$ ,  $\text{CHCl}_3$ ); **HPLC condition**: Daicel IG-3, MeOH, Flow rate = 0.5 mL/min, UV = 254 nm,  $t_R = 14.6$  min (major) and  $t_R = 10.1$  min (minor).

***N*-Boc-protected (*S,E*)-2-(5-methoxy-2-(2-(phenylsulfonyl)vinyl)phenylsulfonimidoyl)-3-methylpyridine (**3f**):**

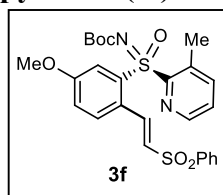

**3f**: 35.7 mg, 27% yield, 89% ee, colorless viscous liquid,  $[\alpha]_D^{25} = +12.42$  ( $c = 1.0$ ,  $\text{CHCl}_3$ );  **$^1\text{H}$  NMR (500 MHz,  $\text{CDCl}_3$ )**  $\delta$  8.31–8.22 (m, 2H), 7.91–7.85 (m, 3H), 7.70 (d,  $J = 7.5$  Hz, 1H), 7.60–7.53 (m, 1H), 7.52–7.46 (m, 3H), 7.33 (dd,  $J = 7.5$ , 4.5 Hz, 1H), 7.10 (dd,  $J = 8.5$ , 2.5 Hz, 1H), 6.57 (d,  $J = 15.5$  Hz, 1H), 3.90 (s, 3H), 2.87 (s, 3H), 1.33 (s, 9H);  **$^{13}\text{C}$  NMR (126 MHz,  $\text{CDCl}_3$ )**  $\delta$  161.1, 156.7, 154.6, 146.1, 142.0, 140.2, 139.3, 138.4, 135.7, 133.2, 130.3, 129.2, 128.6, 127.9, 126.8, 125.6, 119.6, 116.1, 80.7, 55.9, 27.9, 19.1; IR (KBr)  $\nu_{\text{max}}$  2969, 2927, 1738, 1246, 1145, 1083, 733  $\text{cm}^{-1}$ ; **HRMS (ESI)** for  $\text{C}_{26}\text{H}_{28}\text{N}_2\text{NaO}_6\text{S}_2^+$  ( $\text{M}+\text{H}$ ) $^+$ : calcd. 551.1281, found 551.1292; **HPLC condition**: Daicel ODH, n-hexane/i-PrOH = 50/50, Flow rate = 0.5 mL/min, UV = 254 nm,  $t_R = 20.7$  min (major) and  $t_R = 18.9$  min (minor).

***N*-Boc-protected (*R*)-2-(3-methoxyphenylsulfonimidoyl)-3-methylpyridine (**1b**):**

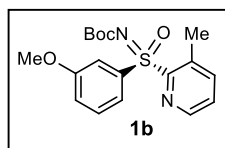

**1b**: 41 mg, 45% yield, 48% ee;  $[\alpha]_{\text{D}}^{25} = -18.8$  ( $c = 0.258$ ,  $\text{CHCl}_3$ ); HPLC condition: Daicel ODH, *n*-hexane/*i*-PrOH = 50/50, Flow rate = 0.5 mL/min, UV = 254 nm,  $t_{\text{R}} = 10.1$  min (major) and  $t_{\text{R}} = 8.6$  min (minor).

***N*-Boc-protected (*S,E*)-diethyl 4-methoxy-2-(3-methylpyridine-2-sulfonimidoyl)styrylphosphonate (**3g**):**

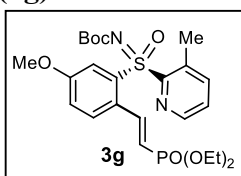

**3g**: 43 mg, 33% yield, 95% ee, colorless viscous liquid,  $[\alpha]_{\text{D}}^{25} = +14.1$  ( $c = 0.058$ ,  $\text{CHCl}_3$ );  **$^1\text{H}$  NMR (500 MHz,  $\text{CDCl}_3$ )**  $\delta$  8.29 (dd,  $J = 4.75, 1.25$  Hz, 1H), 7.96–7.84 (m, 2H), 7.67 (d,  $J = 7.5$  Hz, 1H), 7.57 (d,  $J = 8.5$  Hz, 1H), 7.32 (dd,  $J = 7.75, 4.75$  Hz, 1H), 7.14 (dd,  $J = 8.5, 2.5$  Hz, 1H), 6.01–5.90 (m, 1H), 4.10–3.98 (m, 4H), 3.91 (s, 3H), 2.83 (s, 3H), 1.33 (s, 9H), 1.31–1.22 (m, 6H);  **$^{13}\text{C}$  NMR (126 MHz,  $\text{CDCl}_3$ )**  $\delta$  160.4, 156.8, 154.8, 146.0, 143.7 ( $J = 8.8$  Hz), 141.8, 137.2, 135.5, 129.9, 128.5 ( $d, J = 25.2$  Hz), 126.7, 119.8, 116.6 ( $d, J = 191.5$  Hz), 115.5, 80.5, 62.03 ( $d, J = 6.3$  Hz), 62.01 ( $d, J = 5.0$  Hz), 55.9, 27.9, 19.0, 16.34, 16.3; IR (KBr)  $\nu_{\text{max}}$  2969, 2920, 2850, 1738, 1366, 1228, 1216  $\text{cm}^{-1}$ ; **HRMS (ESI)** for  $\text{C}_{24}\text{H}_{33}\text{N}_2\text{NaO}_7\text{PS}^+$  ( $\text{M}+\text{Na}$ ) $^+$ : calcd. 547.1638, found 546.2053; **HPLC condition**: Daicel IC-3, MeOH, Flow rate = 0.3 mL/min, UV = 254 nm,  $t_{\text{R}} = 16.7$  min (major) and  $t_{\text{R}} = 15.8$  min (minor).

***N*-Boc-protected (*R*)-2-(3-methoxyphenylsulfonimidoyl)-3-methylpyridine (**1b**):**

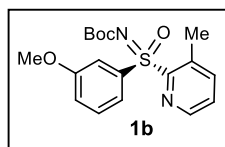

**1b**: 37 mg, 41% yield, 62% ee;  $[\alpha]_{\text{D}}^{25} = -21.0$  ( $c = 0.348$ ,  $\text{CHCl}_3$ ); **HPLC condition**: Daicel IG-3, MeOH, Flow rate = 0.5 mL/min, UV = 254 nm,  $t_{\text{R}} = 14.8$  min (major) and  $t_{\text{R}} = 10.2$  min (minor).

***N*-Boc-protected (*S,E*)-2-(5-methoxy-2-(2-(methylsulfonyl)vinyl)phenylsulfonimidoyl)-3-methylpyridine (**3h**):**

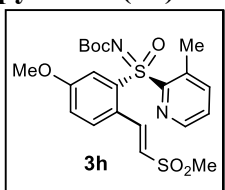

**3h**: 38 mg, 33%, 99% ee, colorless viscous liquid,  $[\alpha]_{\text{D}}^{25} = +16.9$  ( $c = 0.16$ ,  $\text{CHCl}_3$ );  **$^1\text{H}$  NMR (400 MHz,  $\text{CDCl}_3$ )**  $\delta$  8.35–8.26 (m, 2H), 7.84 (d,  $J = 2.4$  Hz, 1H), 7.70 (dd,  $J = 7.6, 0.8$  Hz, 1H), 7.53 (d,  $J = 8.8$  Hz, 1H), 7.36 (dd,  $J = 7.6, 4.4$  Hz, 1H), 7.16 (dd,  $J = 8.6, 2.6$  Hz, 1H), 6.60 (d,  $J = 15.2$  Hz, 1H), 3.91 (s, 3H), 3.03 (s, 3H), 2.83 (s, 3H), 1.31 (s, 9H);  **$^{13}\text{C}$  NMR (101 MHz,  $\text{CDCl}_3$ )**  $\delta$  161.2, 156.5, 154.6, 146.2, 142.15, 142.09, 138.3, 135.5, 130.5, 128.3, 127.0, 126.0, 119.6, 116.2, 80.8, 56.0, 43.0, 27.9, 19.0; IR (KBr)  $\nu_{\text{max}}$  2977, 2932, 2367, 1738, 1242, 1153, 1127  $\text{cm}^{-1}$ ; **HRMS (ESI)** for  $\text{C}_{21}\text{H}_{26}\text{N}_2\text{NaO}_6\text{S}_2^+$  ( $\text{M}+\text{H}$ ) $^+$ : calcd. 489.1124, found 489.1134; **HPLC condition**: Daicel IC-3, *i*-PrOH, Flow rate = 0.5 mL/min, UV = 254 nm,  $t_{\text{R}} = 52.9$  min (major) and  $t_{\text{R}} = 36.8$  min (minor).

***N*-Boc-protected (*R*)-2-(3-methoxyphenylsulfonimidoyl)-3-methylpyridine (**1b**):**

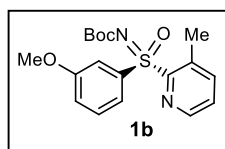

**1b**: 38 mg, 42% yield, 70% ee;  $[\alpha]_{\text{D}}^{25} = -44.56$  ( $c = 0.364$ ,  $\text{CHCl}_3$ ); **HPLC condition**: Daicel IG-3, MeOH, Flow rate = 0.5 mL/min, UV = 254 nm,  $t_{\text{R}} = 13.9$  min (major) and  $t_{\text{R}} = 10.2$  min (minor).

***N*-Boc-protected (*S,E*)-methyl 3-(5-methyl-2-(3-methylpyridine-2-sulfonimidoyl)phenyl) acrylate (**3i**):**

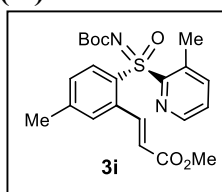

**3i**: 33 mg, 31% yield, 96% ee, colorless viscous liquid,  $[\alpha]_{\text{D}}^{25} = +29.4$  ( $c = 0.108$ ,  $\text{CHCl}_3$ );  **$^1\text{H NMR}$  (500 MHz,  $\text{CDCl}_3$ )**  $\delta$  8.29–8.20 (m, 3H), 7.64 (dd,  $J = 7.75$ , 0.75 Hz, 1H), 7.41–7.36 (m, 2H), 7.29 (dd,  $J = 7.75$ , 4.75 Hz, 1H), 6.09 (d,  $J = 15.5$  Hz, 1H), 3.73 (s, 3H), 2.83 (s, 3H), 2.44 (s, 3H), 1.33 (s, 9H);  **$^{13}\text{C NMR}$  (126 MHz,  $\text{CDCl}_3$ )**  $\delta$  166.2, 157.1, 155.1, 145.9, 144.7, 141.9, 141.6, 136.1, 135.6, 133.1, 131.1, 130.3, 129.5, 126.5,

121.7, 80.3, 51.7, 27.9, 21.5, 19.0; IR (KBr)  $\nu_{\text{max}}$  2969, 2923, 1722, 1366, 1273, 1226, 1154  $\text{cm}^{-1}$ ; **HRMS (ESI)** for  $\text{C}_{22}\text{H}_{27}\text{N}_2\text{O}_5\text{S}^+$  ( $\text{M}+\text{H}^+$ ): calcd. 431.1635, found 431.1646; **HPLC condition**: Daicel ODH, n-hexane/*i*-PrOH = 70/30, Flow rate = 0.3 mL/min, UV = 254 nm,  $t_{\text{R}} = 22.8$  min (major) and  $t_{\text{R}} = 25.5$  min (minor).

***N*-Boc-protected (*R*)-3-methyl-2-(4-methylphenylsulfonimidoyl)pyridine (**1c**):**

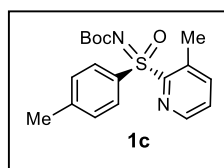

**1c**: 40 mg, 46% yield, 52% ee;  $[\alpha]_{\text{D}}^{25} = -22.3$  ( $c = 0.182$ ,  $\text{CHCl}_3$ ); **HPLC condition**: Daicel IG-3, MeOH, Flow rate = 0.5 mL/min, UV = 254 nm,  $t_{\text{R}} = 19.2$  min (major) and  $t_{\text{R}} = 10.6$  min (minor).

***N*-Boc-protected (*S,E*)-4-(5-methyl-2-(3-methylpyridine-2-sulfonimidoyl)phenyl)but-3-en-2-one (**3j**):**

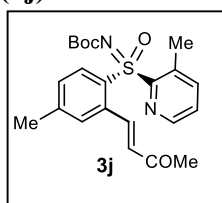

**3j**: 31 mg, 30% yield, 96% ee, colorless viscous liquid,  $[\alpha]_{\text{D}}^{25} = +96.2$  ( $c = 0.08$ ,  $\text{CHCl}_3$ );  **$^1\text{H NMR}$  (500 MHz,  $\text{CDCl}_3$ )**  $\delta$  8.49 (d,  $J = 16.5$  Hz, 1H), 8.32 (d,  $J = 4.5$  Hz, 1H), 8.22 (d,  $J = 8.0$  Hz, 1H), 7.65 (d,  $J = 7.5$  Hz, 1H), 7.45 (bs, 1H), 7.39 (d,  $J = 8.0$  Hz, 1H), 7.34 (dd,  $J = 8.0$ , 4.5 Hz, 1H), 6.32 (d,  $J = 16.5$  Hz, 1H), 2.72 (s, 3H),

2.44 (s, 3H), 2.37 (s, 3H), 1.34 (s, 9H);  **$^{13}\text{C NMR}$  (126 MHz,  $\text{CDCl}_3$ )**  $\delta$  199.1, 157.2, 154.9, 145.8, 145.0, 141.9, 141.8, 136.0, 135.2, 132.9, 131.00, 130.97, 130.5, 129.3, 126.9, 80.5, 27.9, 26.2, 21.5, 19.0; IR (KBr)  $\nu_{\text{max}}$  2969, 2922, 1738, 1671, 1228, 1154  $\text{cm}^{-1}$ ; **HRMS (ESI)** for  $\text{C}_{22}\text{H}_{27}\text{N}_2\text{O}_4\text{S}^+$  ( $\text{M}+\text{H}^+$ ): calcd. 415.1686, found 415.1694; **HPLC condition**: Daicel IG-3, MeOH, Flow rate = 0.5 mL/min, UV = 254 nm,  $t_{\text{R}} = 26.0$  min (major) and  $t_{\text{R}} = 29.9$  min (minor).



***N*-Boc-protected (*R*)-3-methyl-2-(4-methylphenylsulfonimidoyl)pyridine (**1c**):**

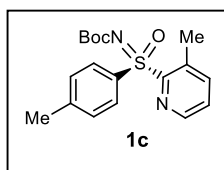

**1c**: 39 mg, 45% yield, 59% ee;  $[\alpha]_D^{25} = -35.6$  ( $c = 0.114$ ,  $\text{CHCl}_3$ ); **HPLC condition**: Daicel IG-3, MeOH, Flow rate = 0.5 mL/min, UV = 254 nm,  $t_R = 19.5$  min (major) and  $t_R = 10.9$  min (minor).

***N*-Boc-protected (*S,E*)-3-methyl-2-(4-methyl-2-(2-(methylsulfonyl)vinyl)phenyl sulfonimidoyl)pyridine (**3k**):**

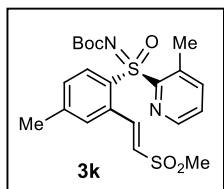

**3k**: 35 mg, 31% yield, 94% ee, colorless solid,  $[\alpha]_D^{25} = +67.2$  ( $c = 0.136$ ,  $\text{CHCl}_3$ );  **$^1\text{H}$  NMR (500 MHz,  $\text{CDCl}_3$ )**  $\delta$  8.37 (d,  $J = 15.5$  Hz, 1H), 8.31 (d,  $J = 3.5$  Hz, 1H), 8.16 (d,  $J = 8.0$  Hz, 1H), 7.67 (d,  $J = 7.0$  Hz, 1H), 7.42 (d,  $J = 8.0$  Hz, 1H), 7.39–7.30 (m, 2H), 6.65 (d,  $J = 15.0$  Hz, 1H), 3.04 (s, 3H), 2.79 (s, 3H), 2.45 (s, 3H), 1.29 (s, 9H);

**$^{13}\text{C}$  NMR (101 MHz,  $\text{CDCl}_3$ )**  $\delta$  156.6, 154.8, 146.2, 145.1, 142.9, 142.0, 135.4, 134.2, 133.6, 131.0, 130.9, 130.0, 126.9, 80.6, 42.9, 27.8, 21.4, 19.0 (1 carbon overlap); IR (KBr)  $\nu_{\text{max}}$  2969, 2932, 1739, 1228  $\text{cm}^{-1}$ ; **HRMS (ESI)** for  $\text{C}_{21}\text{H}_{26}\text{N}_2\text{NaO}_5\text{S}_2^+$  ( $\text{M}+\text{H}$ ) $^+$ : calcd. 473.1175, found 473.1181; **HPLC condition**: Daicel IG-3, MeOH, Flow rate = 0.5 mL/min, UV = 254 nm,  $t_R = 12.6$  min (major) and  $t_R = 18.0$  min (minor).

***N*-Boc-protected (*R*)-3-methyl-2-(4-methylphenylsulfonimidoyl)pyridine (**1c**):**

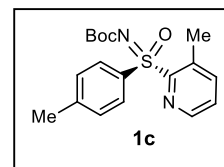

**1c**: 37 mg, 43% yield, 50% ee;  $[\alpha]_D^{25} = -17.3$  ( $c = 0.252$ ,  $\text{CHCl}_3$ ); **HPLC condition**: Daicel IG-3, MeOH, Flow rate = 0.5 mL/min, UV = 254 nm,  $t_R = 18.3$  min (major) and  $t_R = 10.5$  min (minor).

***N*-Boc-protected (*S,E*)-methyl 3-(5-(tert-butyl)-2-(3-methylpyridine-2-sulfonimidoyl) phenyl)acrylate (**3l**):**

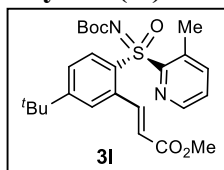

**3l**: 38 mg, 32% yield, 98% ee, colorless viscous liquid,  $[\alpha]_D^{25} = +41.9$  ( $c = 0.16$ ,  $\text{CHCl}_3$ );  **$^1\text{H}$  NMR (400 MHz,  $\text{CDCl}_3$ )**  $\delta$  8.32–8.29 (d,  $J = 2.0$  Hz, 1H), 8.28–8.24 (m, 2H), 7.64 (d,  $J = 7.6$  Hz, 1H), 7.61–7.53 (m, 2H), 7.29 (dd,  $J = 7.6, 4.4$  Hz, 1H),

6.10 (d,  $J = 15.6$  Hz, 1H), 3.74 (s, 3H), 2.83 (s, 3H), 1.35 (s, 9H), 1.32 (s, 9H);  **$^{13}\text{C}$  NMR (101 MHz,  $\text{CDCl}_3$ )**  $\delta$  166.2, 157.5, 157.0, 155.2, 146.0, 142.4, 141.6, 135.8, 135.6, 133.2, 130.9, 126.8, 126.5, 126.0, 121.6, 80.3, 51.7, 35.2, 30.9, 27.9, 19.0; IR (KBr)  $\nu_{\text{max}}$  2968, 2360, 1721, 1366, 1271, 1249, 1154  $\text{cm}^{-1}$ ; **HRMS (ESI)** for  $\text{C}_{25}\text{H}_{32}\text{N}_2\text{NaO}_5\text{S}^+$  ( $\text{M}+\text{Na}$ ) $^+$ : calcd. 495.1924, found 495.1937; **HPLC condition**: cellulose-2, n-hexane/*i*-PrOH = 50/50, Flow rate = 0.5 mL/min, UV = 254 nm,  $t_R = 20.1$  min (major) and  $t_R = 32.2$  min (minor).

***N*-Boc-protected (*R*)-2-(4-(*tert*-butyl)phenylsulfonimidoyl)-3-methylpyridine (**1d**):**

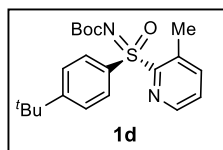

**1d**: 42 mg, 43% yield, 59% ee;  $[\alpha]_{\text{D}}^{25} = +33.3$  ( $c = 0.1$ ,  $\text{CHCl}_3$ ); **HPLC condition**: Daicel IG-3, MeOH, Flow rate = 0.5 mL/min, UV = 254 nm,  $t_{\text{R}} = 31.5$  min (major) and  $t_{\text{R}} = 12.2$  min (minor).

***N*-Boc-protected (*S,E*)-methyl 3-(5-isopropyl-2-(3-methylpyridine-2-sulfonimidoyl)phenyl) acrylate (**3m**):**

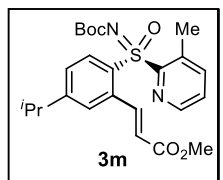

**3m**: 34 mg, 30% yield, 94% ee, colorless viscous liquid,  $[\alpha]_{\text{D}}^{25} = +27.6$  ( $c = 0.55$ ,  $\text{CHCl}_3$ );  **$^1\text{H NMR}$  (400 MHz,  $\text{CDCl}_3$ )**  $\delta$  8.32–8.23 (m, 3H), 7.65 (d,  $J = 7.6$  Hz, 1H), 7.46–7.39 (m, 2H), 7.30 (dd,  $J = 7.6, 4.4$  Hz, 1H), 6.11 (d,  $J = 15.6$  Hz, 1H), 3.75 (s, 3H), 3.07–2.94 (m, 1H), 2.84 (s, 3H), 1.33 (s, 9H), 1.29 (d,  $J = 6.8$  Hz, 6H);  **$^{13}\text{C NMR}$**

(101 MHz,  $\text{CDCl}_3$ )  $\delta$  166.2, 157.1, 155.2, 146.0, 142.2, 141.6, 136.2, 135.6, 133.5, 131.2, 127.8, 127.1, 126.5, 121.7, 80.3, 51.7, 34.1, 27.9, 23.53, 23.46, 19.0 (1 carbon is overlapped); IR (KBr)  $\nu_{\text{max}}$  2986, 1720, 1666, 1267, 1247, 1151, 1041  $\text{cm}^{-1}$ ; **HRMS (ESI)** for  $\text{C}_{24}\text{H}_{31}\text{N}_2\text{O}_5\text{S}^+$  ( $\text{M}+\text{H}$ ) $^+$ : calcd. 459.1948, found 459.1959; **HPLC condition**: Daicel IG-3, *i*-PrOH, Flow rate = 0.5 mL/min, UV = 254 nm,  $t_{\text{R}} = 30.1$  min (major) and  $t_{\text{R}} = 57.6$  min (minor).

***N*-Boc-protected (*R*)-2-(4-isopropylphenylsulfonimidoyl)-3-methylpyridine (**1e**):**

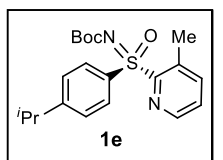

**1e**: 42 mg, 45% yield, 57% ee;  $[\alpha]_{\text{D}}^{25} = -28.9$  ( $c = 0.588$ ,  $\text{CHCl}_3$ ); **HPLC condition**: Daicel IG-3, MeOH, Flow rate = 0.5 mL/min, UV = 254 nm,  $t_{\text{R}} = 23.4$  min (major) and  $t_{\text{R}} = 12.0$  min (minor).

***N*-Boc-protected (*S,E*)-methyl 3-(4-ethoxy-2-(3-methylpyridine-2-sulfonimidoyl)phenyl) acrylate (**3n**):**

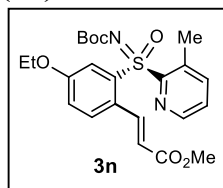

**3n**: 48 mg, 42% yield, 85% ee, colorless viscous liquid,  $[\alpha]_{\text{D}}^{25} = +50.1$  ( $c = 0.11$ ,  $\text{CHCl}_3$ );  **$^1\text{H NMR}$  (500 MHz,  $\text{CDCl}_3$ )**  $\delta$  8.26 (dd,  $J = 4.5, 0.75$  Hz, 1H), 8.19 (d,  $J = 16.0$  Hz, 1H), 7.89 (d,  $J = 3.0$  Hz, 1H), 7.68–7.62 (m, 1H), 7.53 (d,  $J = 8.5$  Hz, 1H), 7.30 (dd,  $J = 8.0, 4.5$  Hz, 1H), 7.11 (dd,  $J = 8.5, 2.5$  Hz, 1H), 6.04 (d,  $J = 15.5$  Hz,

1H), 4.13 (q,  $J = 6.83$  Hz, 2H), 3.71 (s, 3H), 2.84 (s, 3H), 1.42 (t,  $J = 7.0$  Hz, 3H), 1.33 (s, 9H);  **$^{13}\text{C NMR}$  (126 MHz,  $\text{CDCl}_3$ )**  $\delta$  166.5, 159.9, 156.9, 155.0, 146.0, 141.6, 141.2, 137.5, 135.6, 129.9, 127.8, 126.6, 120.1, 119.8, 116.3, 80.4, 64.3, 51.6, 27.9, 18.9, 14.5; IR (KBr)  $\nu_{\text{max}}$  2921, 2850, 1737, 1366, 1230, 1156  $\text{cm}^{-1}$ ; **HRMS (ESI)** for  $\text{C}_{23}\text{H}_{29}\text{N}_2\text{O}_6\text{S}^+$  ( $\text{M}+\text{H}$ ) $^+$ : calcd. 461.1741, found 489.1749; **HPLC condition**: Daicel IC-3, *i*-PrOH, Flow rate = 0.5 mL/min, UV = 254 nm,  $t_{\text{R}} = 37.7$  min (major) and  $t_{\text{R}} = 28.6$  min (minor).

***N*-Boc-protected (*R*)-2-(3-ethoxyphenylsulfonimidoyl)-3-methylpyridine (**1f**):**

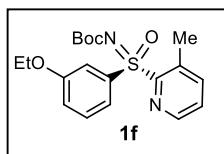

**1f**: 32 mg, 34% yield, 88% ee;  $[\alpha]_{\text{D}}^{25} = -18.8$  ( $c = 0.258$ ,  $\text{CHCl}_3$ ); **HPLC condition**: Daicel IG-3, MeOH, Flow rate = 0.5 mL/min, UV = 254 nm,  $t_{\text{R}} = 34.1$  min (major) and  $t_{\text{R}} = 16.8$  min (minor).

***N*-Boc-protected (*S,E*)-methyl 3-(4-methyl-2-(3-methylpyridine-2-sulfonimidoyl)phenyl) acrylate (**3o**):**

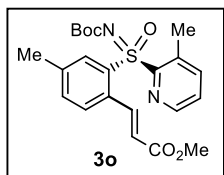

**3o**: 38 mg, 35% yield, 96% ee, colorless viscous liquid,  $[\alpha]_{\text{D}}^{25} = +29.7$  ( $c = 0.03$ ,  $\text{CHCl}_3$ ); **<sup>1</sup>H NMR (500 MHz, CDCl<sub>3</sub>)**  $\delta$  8.26 (d,  $J = 3.5$  Hz, 1H), 8.25–8.18 (m, 2H), 7.66 (d,  $J = 8.0$  Hz, 1H), 7.49 (d,  $J = 7.5$  Hz, 1H), 7.43 (d,  $J = 8.5$  Hz, 1H), 7.30 (dd,  $J = 8.0, 4.5$  Hz, 1H), 6.08 (d,  $J = 16.0$  Hz, 1H), 3.73 (s, 3H), 2.87 (s, 3H), 2.47 (s, 3H),

1.34 (s, 9H); **<sup>13</sup>C NMR (126 MHz, CDCl<sub>3</sub>)**  $\delta$  166.3, 157.1, 155.2, 146.0, 141.62, 141.60, 140.4, 136.1, 135.9, 134.5, 133.3, 131.3, 128.7, 126.5, 121.2, 80.4, 51.7, 27.9, 21.3, 19.0; IR (KBr)  $\nu_{\text{max}}$  2969, 2853, 1738, 1366, 1228, 1216, 1156  $\text{cm}^{-1}$ ; **HRMS (ESI)** for  $\text{C}_{22}\text{H}_{26}\text{N}_2\text{NaO}_5\text{S}^+$  ( $\text{M}+\text{Na}$ )<sup>+</sup>: calcd. 453.1455, found 453.1469; **HPLC condition**: Cellulose-1, n-hexane/*i*-PrOH = 70/30, Flow rate = 0.3 mL/min, UV = 254 nm,  $t_{\text{R}} = 28.0$  min (major) and  $t_{\text{R}} = 24.1$  min (minor).

***N*-Boc-protected (*R*)-3-methyl-2-(3-methylphenylsulfonimidoyl)pyridine (**1g**):**

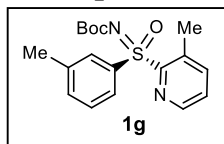

**1g**: 36 mg, 42% yield, 68% ee;  $[\alpha]_{\text{D}}^{25} = -66.7$  ( $c = 0.006$ ,  $\text{CHCl}_3$ ); **HPLC condition**: Daicel IG-3, MeOH, Flow rate = 0.3 mL/min, UV = 254 nm,  $t_{\text{R}} = 18.2$  min (major) and  $t_{\text{R}} = 16.4$  min (minor).

***N*-Boc-protected (*S,E*)-methyl 3-(4-chloro-2-(3-methylpyridine-2-sulfonimidoyl)phenyl) acrylate (**3p**):**

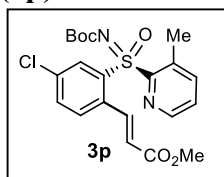

**3p**: 25 mg, 22% yield, 89% ee, colorless viscous liquid,  $[\alpha]_{\text{D}}^{25} = +32.1$  ( $c = 0.07$ ,  $\text{CHCl}_3$ ); **<sup>1</sup>H NMR (500 MHz, CDCl<sub>3</sub>)**  $\delta$  8.37 (d,  $J = 2.0$  Hz, 1H), 8.24 (dd,  $J = 4.5, 1.0$  Hz, 1H), 8.18 (d,  $J = 15.5$  Hz, 1H), 7.69 (dd,  $J = 7.75, 0.75$  Hz, 1H), 7.61 (dd,  $J = 8.25, 2.25$  Hz, 1H), 7.53 (d,  $J = 8.5$  Hz, 1H), 7.33 (dd,  $J = 7.75, 4.75$  Hz, 1H), 6.11

(d,  $J = 16$  Hz, 1H), 3.74 (s, 3H), 2.88 (s, 3H), 1.34 (s, 9H); **<sup>13</sup>C NMR (126 MHz, CDCl<sub>3</sub>)**  $\delta$  166.0, 156.8, 154.7, 146.0, 141.8, 140.7, 137.8, 136.1, 135.9, 134.7, 133.8, 131.0, 129.9, 126.8, 122.3, 80.8, 51.9, 27.9, 18.9; IR (KBr)  $\nu_{\text{max}}$  2969, 2851, 1727, 1221, 1208, 1100  $\text{cm}^{-1}$ ; **HRMS (ESI)** for  $\text{C}_{21}\text{H}_{23}\text{ClN}_2\text{NaO}_5\text{S}^+$  ( $\text{M}+\text{Na}$ )<sup>+</sup>: calcd. 473.0908, found 473.0919; **HPLC condition**: Daicel IG-3, MeOH, Flow rate = 0.2 mL/min, UV = 254 nm,  $t_{\text{R}} = 23.1$  min (major) and  $t_{\text{R}} = 22.0$  min (minor).

***N*-Boc-protected (*R*)-2-(3-chlorophenylsulfonimidoyl)-3-methylpyridine (**1h**):**

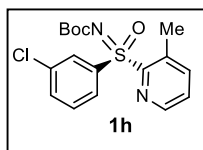

**1h**: 33 mg, 36% yield, 35% ee;  $[\alpha]_D^{25} = -46$  ( $c = 0.05$ ,  $\text{CHCl}_3$ ); **HPLC condition**: Daicel IG-3, MeOH, Flow rate = 0.2 mL/min, UV = 254 nm,  $t_R = 32.4$  min (major) and  $t_R = 24.3$  min (minor).

***N*-Boc-protected (*S,E*)-methyl 3-(2,4-dimethyl-6-(3-methylpyridine-2-sulfonimidoyl)phenyl)acrylate (**3q**):**

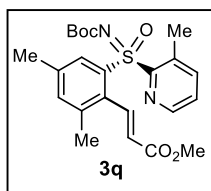

**3q**: 40 mg, 36% yield, 96% ee, colorless solid,  $[\alpha]_D^{25} = +8.3$  ( $c = 0.1$ ,  $\text{CHCl}_3$ );  **$^1\text{H}$  NMR (400 MHz,  $\text{CDCl}_3$ )**  $\delta$  8.25 (dd,  $J = 4.6, 1.0$  Hz, 1H), 8.18 (bs, 1H), 7.76 (d,  $J = 16.4$  Hz, 1H), 7.58 (dd,  $J = 7.6, 0.8$  Hz, 1H), 7.33–7.27 (m, 2H), 5.48 (d,  $J = 16.4$  Hz, 1H), 3.72 (s, 3H), 2.78 (s, 3H), 2.42 (s, 3H), 2.25 (s, 3H), 1.36 (s, 9H);  **$^{13}\text{C}$  NMR (101**

**MHz,  $\text{CDCl}_3$ )**  $\delta$  165.8, 157.3, 155.3, 146.0, 141.3, 141.2, 138.3, 137.4, 136.7, 136.5, 136.4, 132.5, 128.9, 126.4, 125.1, 80.3, 51.6, 28.0, 21.1, 20.8, 19.1; **IR (KBr)**  $\nu_{\text{max}}$  2966, 2920, 2851, 1725, 1258, 1154, 1014  $\text{cm}^{-1}$ ; **HRMS (ESI)** for  $\text{C}_{23}\text{H}_{29}\text{N}_2\text{O}_5\text{S}^+$  ( $\text{M}+\text{H}$ ) $^+$ : calcd. 445.1792, found 445.1799; **HPLC condition**: Daicel IC-3, *i*-PrOH, Flow rate = 0.5 mL/min, UV = 254 nm,  $t_R = 44.2$  min (major) and  $t_R = 57.5$  min (minor).

***N*-Boc-protected (*R*)-2-(3,5-dimethylphenylsulfonimidoyl)-3-methylpyridine (**1i**):**

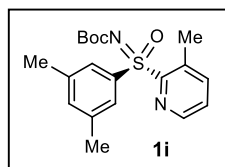

**1i**: 34 mg, 38% yield, 76% ee;  $[\alpha]_D^{25} = -29.3$  ( $c = 0.028$ ,  $\text{CHCl}_3$ ); **HPLC condition**: Daicel IG-3, MeOH, Flow rate = 0.5 mL/min, UV = 254 nm,  $t_R = 14.1$  min (major) and  $t_R = 10.1$  min (minor).

***N*-Boc-protected (*R,E*)-methyl 3-(2-(3-methylpyridine-2-sulfonimidoyl)thiophen-3-yl)acrylate (**3r**):**

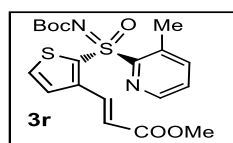

**3r**: 34 mg, 32% yield, 92% ee, colorless viscous liquid;  **$^1\text{H}$  NMR (500 MHz,  $\text{CDCl}_3$ )**  $\delta$  8.32 (d,  $J = 4.5$  Hz, 1H), 8.04 (d,  $J = 16$  Hz, 1H), 7.73–7.64 (m, 2H), 7.36 (d,  $J = 5.5$  Hz, 1H), 7.35–7.30 (m, 1H), 6.27 (d,  $J = 16$  Hz, 1H), 3.74 (s, 3H), 2.83

(s, 3H), 1.32 (s, 9H);  **$^{13}\text{C}$  NMR (126 MHz,  $\text{CDCl}_3$ )**  $\delta$  166.4, 156.6, 155.3, 146.4, 141.9, 136.3, 135.1, 134.6, 133.5, 127.3, 126.8, 122.5, 121.7, 80.8, 51.8, 27.9, 19.1; **HRMS (ESI)** for  $\text{C}_{19}\text{H}_{23}\text{N}_2\text{O}_5\text{S}_2^+$  ( $\text{M}+\text{H}$ ) $^+$ : calcd. 423.1043, found 423.1043. **HPLC condition**: Daicel IF-3, *n*-hexane/*i*-PrOH = 50/50, Flow rate = 0.6 mL/min, UV = 254 nm,  $t_R = 14.9$  min (major) and  $t_R = 20.0$  min (minor).

***N*-Boc-protected 3-methyl-2-(thiophene-2-sulfonimidoyl)pyridine (**1m**):**

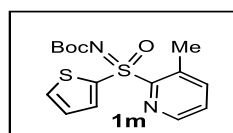

**1m**: 36 mg, 42% yield, 66% ee; **HPLC condition**: Daicel IF-3, *n*-hexane/*i*-PrOH = 85/15, Flow rate = 0.6 mL/min, UV = 254 nm,  $t_R = 13.8$  min (major) and  $t_R = 12.9$  min (minor).

## 2.6 General Procedures for kinetic resolution via Pd-Catalyzed C(sp<sup>2</sup>)-H Arylation (GP-4):

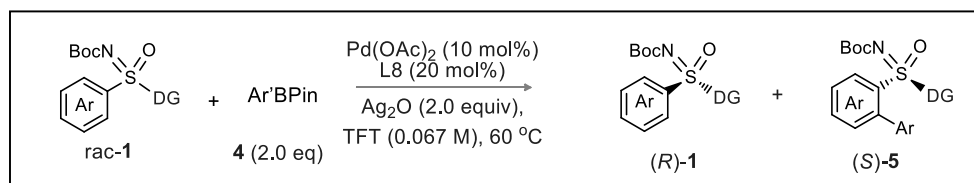

To an oven-dried 10 mL screw-capped vial was added substrate (0.2 mmol), ArBPIn (0.4 mmol), Pd(OAc)<sub>2</sub> (4.6 mg, 0.02 mmol), L8 (0.04 mmol), Ag<sub>2</sub>O (56 mg, 0.4 mmol), 2-chloro benzoquinone (0.1 mmol), TFT (3.0 mL). The mixture was stirred for 72 h at 60 °C. The resulting mixture was then cooled to rt and filtered through a small pad of Celite and concentrated in vacuo. The residue was purified by Silica gel column chromatography using hexane/EtOAc as eluent to afford the chiral product and chiral starting material.

### (S)-N-Boc-protected 2-(4-methoxy-4'-(trifluoromethyl)-[1,1'-biphenyl]-2-sulfonimidoyl)-3-methylpyridine (**5a**):

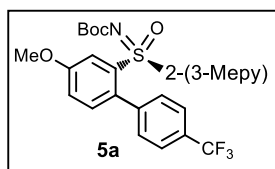

**5a**: 42 mg, 42% yield, 92% ee, colorless solid,  $[\alpha]_D^{25} = +39.7$  ( $c = 0.216$ , CHCl<sub>3</sub>);

<sup>1</sup>H NMR (500 MHz, CDCl<sub>3</sub>)  $\delta$  8.24–8.18 (m, 2H), 7.37–7.30 (m, 3H), 7.18 (dd,  $J = 7.5, 4.5$  Hz, 1H), 7.18–7.12 (m, 1H), 7.12–6.60 (m, 3H), 3.96 (s, 3H), 2.30

(s, 3H), 1.32 (s, 9H); <sup>13</sup>C NMR (126 MHz, CDCl<sub>3</sub>)  $\delta$  159.1, 157.0, 154.9, 146.0, 141.8, 140.9, 138.1, 136.6, 133.3, 132.9, 130.2, 129.4 (q,  $J = 33$  Hz), 126.3, 124.0 (q,  $J = 274$  Hz), 123.98 (q,  $J = 4.0$  Hz), 119.5, 114.7, 80.3, 55.9, 27.9, 18.8; <sup>19</sup>F NMR (471 MHz, CDCl<sub>3</sub>)  $\delta$  –62.76; IR (KBr)  $\nu_{\max}$  2969, 1663, 1600, 1322, 1106, 822, 800 cm<sup>-1</sup>; HRMS (ESI) for C<sub>25</sub>H<sub>26</sub>F<sub>3</sub>N<sub>2</sub>O<sub>4</sub>S<sup>+</sup> (M+H)<sup>+</sup>: calcd. 507.1560, found 507.1569; HPLC condition: Daicel Chiralpak IG-3, MeOH/*i*-PrOH = 95/5, Flow rate = 0.3 mL/min, UV = 254 nm, t<sub>R</sub> = 17.2 min (major) and t<sub>R</sub> = 14.5 min (minor).

### (R)-N-Boc-protected 2-(3-methoxyphenylsulfonimidoyl)-3-methylpyridine (**1b**):

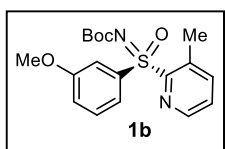

**1b**: 32 mg, 44% yield, 89% ee;  $[\alpha]_D^{25} = -35.7$  ( $c = 0.172$ , CHCl<sub>3</sub>); HPLC condition:

Daicel IG-3, MeOH, Flow rate = 0.7 mL/min, UV = 254 nm, t<sub>R</sub> = 7.3 min (minor) and t<sub>R</sub> = 10.3 min (major).

**(S)-N-Boc-protected 2-(4-methoxy-3'-(trifluoromethyl)-[1,1'-biphenyl]-2-sulfonimidoyl)-3-methylpyridine (5b):**

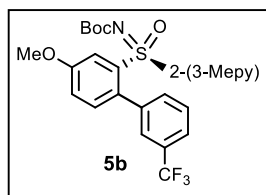

**5b:** 43 mg, 43% yield, 93% ee, colorless viscous liquid,  $[\alpha]_D^{25} = +46.7$  ( $c = 0.06$ ,  $\text{CHCl}_3$ );  **$^1\text{H NMR}$  (400 MHz,  $\text{CDCl}_3$ )**  $\delta$  8.26–8.19 (m, 2H), 7.45 (d,  $J = 7.2$  Hz, 1H), 7.37–7.29 (m, 3H), 7.20 (dd,  $J = 7.6, 4.4$  Hz, 1H), 7.19–7.12 (m, 1H), 7.11–7.06 (m, 1H), 6.93–6.82 (m, 1H), 3.98 (s, 3H), 2.28 (s, 3H), 1.34 (s, 9H);

**$^{13}\text{C NMR}$  (101 MHz,  $\text{CDCl}_3$ )**  $\delta$  159.0, 157.1, 154.7, 146.0, 141.0, 138.8, 138.0, 136.6, 133.9, 133.6, 132.7, 129.5 (q,  $J = 32$  Hz), 127.7, 126.5, 125.8, 124.2 (q,  $J = 4.0$  Hz), 123.7 (q,  $J = 274$  Hz), 119.5, 114.7, 80.3, 55.9, 27.9, 18.8;  **$^{19}\text{F NMR}$  (471 MHz,  $\text{CDCl}_3$ )**  $\delta$  -62.49; IR (KBr)  $\nu_{\text{max}}$  2985, 1645, 1276, 1246, 1158, 1119, 901  $\text{cm}^{-1}$ ; **HRMS (ESI)** for  $\text{C}_{25}\text{H}_{26}\text{F}_3\text{N}_2\text{O}_4\text{S}^+$  ( $\text{M}+\text{H}$ ) $^+$ : calcd. 507.1560, found 507.1566; **HPLC condition:** Daicel Chiralpak AS-H, n-hexane/*i*-PrOH = 90/10, Flow rate = 1.00 mL/min, UV = 254 nm, tR = 13.3 min (major) and tR = 15.5 min (minor).

**(R)-N-Boc-protected 2-(3-methoxyphenylsulfonimidoyl)-3-methylpyridine (1b):**

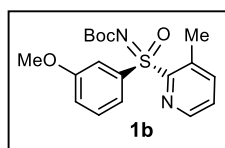

**1b:** 30 mg, 41% yield, 90% ee;  $[\alpha]_D^{25} = -34.9$  ( $c = 0.129$ ,  $\text{CHCl}_3$ ); **HPLC condition:** Daicel IG-3, MeOH, Flow rate = 0.5 mL/min, UV = 254 nm, tR = 15.4 min (major).and tR = 10.7 min (minor).

**(S)-N-Boc-protected 1-(4'-methoxy-2'-(3-methylpyridine-2-sulfonimidoyl)-[1,1'-biphenyl]-3-yl)-ethanone (5c):**

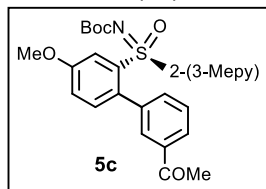

**5c:** 39 mg, 41% yield, 95% ee, colorless viscous liquid,  $[\alpha]_D^{25} = +70.0$  ( $c = 0.01$ ,  $\text{CHCl}_3$ );  **$^1\text{H NMR}$  (500 MHz,  $\text{CDCl}_3$ )**  $\delta$  8.24–8.16 (m, 2H), 7.78 (d,  $J = 7.5$  Hz, 1H), 7.45–7.37 (m, 1H), 7.31 (d,  $J = 7.5$  Hz, 1H), 7.25–7.07 (m, 5H), 3.95 (s, 3H), 2.46 (s, 3H), 2.25 (s, 3H), 1.32 (s, 9H);  **$^{13}\text{C NMR}$  (126 MHz,  $\text{CDCl}_3$ )**  $\delta$  197.5,

159.0, 157.0, 154.9, 146.0, 140.8, 138.5, 138.0, 136.4, 136.0, 134.5, 133.6, 133.3, 129.9, 127.6, 127.0, 126.2, 119.5, 114.8, 80.2, 55.9, 27.9, 26.5, 18.8; IR (KBr)  $\nu_{\text{max}}$  2969, 2926, 1738, 1365, 1275, 1229, 1156  $\text{cm}^{-1}$ ; **HRMS (ESI)** for  $\text{C}_{26}\text{H}_{28}\text{N}_2\text{NaO}_5\text{S}^+$  ( $\text{M}+\text{Na}$ ) $^+$ : calcd. 503.1611, found 503.1619; **HPLC condition:** Daicel IG-3, MeOH, Flow rate = 0.3 mL/min, UV = 254 nm, tR = 20.1 min (major) and tR = 25.4 min (minor).

**(R)-N-Boc-protected 2-(3-methoxyphenylsulfonimidoyl)-3-methylpyridine (1b):**

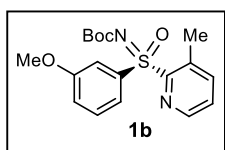

**1b:** 30 mg, 42% yield, 82% ee;  $[\alpha]_D^{25} = -62$  ( $c = 0.01$ ,  $\text{CHCl}_3$ ); **HPLC condition:** Daicel IG-3, MeOH, Flow rate = 0.3 mL/min, UV = 254 nm, tR = 24.7 min (major) and tR = 17.1 min (minor).

**(S)-N-Boc-protected 2-(4'-fluoro-4-methoxy-[1,1'-biphenyl]-2-sulfonimidoyl)-3-methylpyridine (5d):**

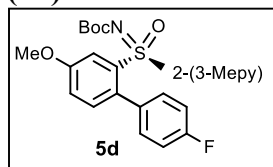

**5d:** 36 mg, 40% yield, 97% ee, light yellow solid,  $[\alpha]_D^{25} = +61$  ( $c = 0.22$ ,  $\text{CHCl}_3$ );

**$^1\text{H NMR}$  (500 MHz,  $\text{CDCl}_3$ )**  $\delta$  8.25–8.20 (m, 1H), 8.20 (d,  $J = 3.0$  Hz, 1H), 7.37 (d,  $J = 7.5$  Hz, 1H), 7.20 (dd,  $J = 7.5, 4.5$  Hz, 1H), 7.15–7.09 (m, 1H), 7.08–7.03

(m, 1H), 6.78–6.73 (m, 4H), 3.94 (s, 3H), 2.33 (s, 3H), 1.32 (s, 9H);  **$^{13}\text{C NMR}$  (126 MHz,  $\text{CDCl}_3$ )**  $\delta$  162.1 (d,  $J = 248$  Hz), 158.8, 157.0, 155.0, 145.9, 140.9, 138.1, 136.6, 134.0, 133.9, 133.5, 131.5, 126.2, 119.5, 114.6, 114.0 (d,  $J = 21$  Hz), 80.2, 55.8, 27.9, 18.9; IR (KBr)  $\nu_{\text{max}}$  2969, 1663, 1600, 1322, 1106, 822, 800  $\text{cm}^{-1}$ ;  **$^{19}\text{F NMR}$  (376 MHz,  $\text{CDCl}_3$ )**  $\delta$  –114.76; **HPLC condition:** Daicel Chiralpak IH-3, *i*-PrOH, Flow rate = 0.4 mL/min, UV = 254 nm,  $t_R = 13.5$  min (major) and  $t_R = 15.4$  min (minor).

**(R)-N-Boc-protected 2-(3-methoxyphenylsulfonimidoyl)-3-methylpyridine (1b):**

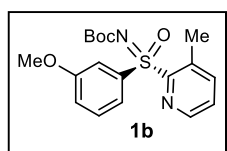

**1b:** 30 mg, 42% yield, 85% ee;  $[\alpha]_D^{25} = -56$  ( $c = 0.025$ ,  $\text{CHCl}_3$ ); **HPLC condition:**

Daicel IG-3, MeOH, Flow rate = 0.5 mL/min, UV = 254 nm,  $t_R = 15.7$  min (major) and  $t_R = 11.1$  min (minor).

**(S)-N-Boc-protected 2-(4-methoxy-4'-methyl-[1,1'-biphenyl]-2-sulfonimidoyl)-3-methylpyridine (5e):**

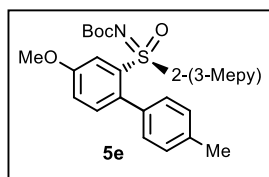

**5e:** 37 mg, 41% yield, 94% ee, colorless solid,  $[\alpha]_D^{25} = +84.3$  ( $c = 0.122$ ,  $\text{CHCl}_3$ );

**$^1\text{H NMR}$  (500 MHz,  $\text{CDCl}_3$ )**  $\delta$  8.20 (d,  $J = 2.5$  Hz, 2H), 7.31 (d,  $J = 7.5$  Hz, 1H), 7.20–7.14 (m, 1H), 7.13–7.09 (m, 1H), 7.08–7.04 (m, 1H), 6.95–6.70 (m, 4H),

3.95 (s, 3H), 2.28 (s, 6H), 1.32 (s, 9H);  **$^{13}\text{C NMR}$  (101 MHz,  $\text{CDCl}_3$ )**  $\delta$  158.5,

157.1 155.1, 145.9, 140.7, 138.0, 136.9, 136.8, 135.1, 134.7, 133.9, 129.6, 127.8, 126.0, 119.6, 114.2, 80.1, 55.9, 27.9, 21.1, 18.9; IR (KBr)  $\nu_{\text{max}}$  2974, 2924, 1658, 1268, 1245, 1155, 1032  $\text{cm}^{-1}$ ; **HRMS (ESI)** for  $\text{C}_{25}\text{H}_{29}\text{N}_2\text{O}_4\text{S}^+$  ( $\text{M}+\text{H}$ ) $^+$ : calcd. 453.1843, found 453.1844; **HPLC condition:** Daicel Chiralpak IG-3, MeOH / *i*-PrOH = 95/5, Flow rate = 0.3 mL/min, UV = 254 nm,  $t_R = 17.9$  min (minor) and  $t_R = 19.6$  min (major).

**(R)-N-Boc-protected 2-(3-methoxyphenylsulfonimidoyl)-3-methylpyridine (1b):**

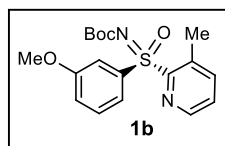

**1b:** 33 mg, 46% yield, 80% ee;  $[\alpha]_D^{25} = -34.75$  ( $c = 0.175$ ,  $\text{CHCl}_3$ ); **HPLC condition:**

Daicel IG-3, MeOH, Flow rate = 0.7 mL/min, UV = 254 nm,  $t_R = 7.3$  min (minor) and  $t_R = 10.3$  min (major).

**(S)-N-Boc-protected 2-(3'-ethoxy-4,4'-dimethoxy-[1,1'-biphenyl]-2-sulfonimidoyl)-3-methylpyridine (5f):**

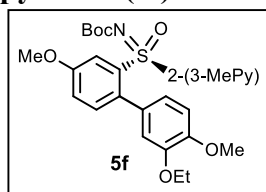

**5f:** 45 mg, 44% yield, 93% ee, colorless solid,  $[\alpha]_{\text{D}}^{25} = +51.4$  ( $c = 0.01$ ,  $\text{CHCl}_3$ );

**$^1\text{H NMR}$  (500 MHz,  $\text{CDCl}_3$ )**  $\delta$  8.21–8.17 (m, 2H), 7.30 (d,  $J = 7.5$  Hz, 1H), 7.13 (dd,  $J = 7.5, 4.5$  Hz, 1H), 7.10–7.04 (m, 2H), 6.85–6.10 (m, 3H), 3.92 (s, 3H), 3.90–3.80 (m, 2H), 3.79 (s, 3H), 2.30 (s, 3H), 1.36 (t,  $J = 7.0$  Hz, 3H), 1.30 (s,

9H);  **$^{13}\text{C NMR}$  (126 MHz,  $\text{CDCl}_3$ )**  $\delta$  158.4, 157.1, 154.9, 148.3, 146.7, 145.7, 140.5, 138.3, 136.7, 134.1, 133.9, 130.3, 125.8, 122.0, 119.4, 114.4, 114.0, 110.2, 79.9, 63.8, 55.9, 55.8, 27.8, 18.8, 14.6; **IR** (KBr)  $\nu_{\text{max}}$  3028, 2974, 2850, 1738, 1366, 1228, 1216  $\text{cm}^{-1}$ ; **HRMS (ESI)** for  $\text{C}_{27}\text{H}_{33}\text{N}_2\text{O}_6\text{S}^+$  ( $\text{M}+\text{H}$ ) $^+$ : calcd. 513.2054, found 513.2062; **HPLC condition:** Daicel IG-3, MeOH, Flow rate = 0.3 mL/min, UV = 254 nm,  $t_{\text{R}} = 20.4$  min (major) and  $t_{\text{R}} = 18.4$  min (minor).

**(R)-N-Boc-protected 2-(3-methoxyphenylsulfonimidoyl)-3-methylpyridine (1b):**

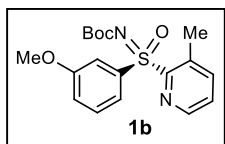

**1b:** 33 mg, 46% yield, 83% ee;  $[\alpha]_{\text{D}}^{25} = -68.0$  ( $c = 0.01$ ,  $\text{CHCl}_3$ ); **HPLC condition:**

Daicel IG-3, MeOH, Flow rate = 0.3 mL/min, UV = 254 nm,  $t_{\text{R}} = 24.6$  min (major) and  $t_{\text{R}} = 17.1$  min (minor).

**(S)-N-Boc-protected 2-(3'-chloro-4-methoxy-[1,1'-biphenyl]-2-sulfonimidoyl)-3-methylpyridine (5g):**

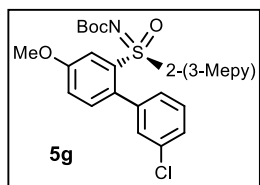

**5g:** 37 mg, 39% yield, 96% ee, colorless solid,  $[\alpha]_{\text{D}}^{25} = +40.0$  ( $c = 0.01$ ,  $\text{CHCl}_3$ );

**$^1\text{H NMR}$  (400 MHz,  $\text{CDCl}_3$ )**  $\delta$  8.25 (d,  $J = 4.8$  Hz, 1H), 8.22 (d,  $J = 2.8$  Hz, 1H), 7.38 (d,  $J = 7.6$  Hz, 1H), 7.26–7.20 (m, 2H), 7.19–7.09 (m, 3H), 7.09–7.03 (m, 2H), 3.96 (s, 3H), 2.33 (s, 3H), 1.34 (s, 9H);  **$^{13}\text{C NMR}$  (126 MHz,  $\text{CDCl}_3$ )**  $\delta$  158.9,

157.1, 154.9, 146.0, 140.9, 139.8, 138.2, 136.9, 133.5, 132.9, 132.8, 128.5, 127.5, 126.2, 119.5, 114.6, 80.2, 55.9, 28.0, 19.9 (2 carbons missing); **HRMS (ESI)** for  $\text{C}_{24}\text{H}_{26}\text{ClN}_2\text{O}_4\text{S}^+$  ( $\text{M}+\text{H}$ ) $^+$ : calcd. 473.1296, found 473.1305; **HPLC condition:** Daicel IG-3, MeOH, Flow rate = 0.3 mL/min, UV = 254 nm,  $t_{\text{R}} = 18.1$  min (major) and  $t_{\text{R}} = 20.0$  min (minor).

**(R)-N-Boc-protected 2-(3-methoxyphenylsulfonimidoyl)-3-methylpyridine (1b):**

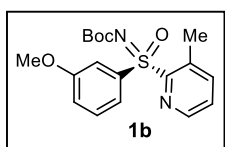

**1b:** 32 mg, 44% yield, 83% ee;  $[\alpha]_{\text{D}}^{25} = -70.0$  ( $c = 0.01$ ,  $\text{CHCl}_3$ ); **HPLC condition:**

Daicel IG-3, MeOH, Flow rate = 0.3 mL/min, UV = 254 nm,  $t_{\text{R}} = 24.2$  min (major) and  $t_{\text{R}} = 16.9$  min (minor).



**(S)-N-Boc-protected 2-(5-methoxy-2-(naphthalen-1-yl)phenylsulfonimidoyl)-3-methylpyridine (5h):**

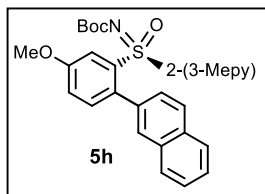

**5h:** 37 mg, 38% yield, 98% ee, colorless viscous liquid,  $[\alpha]_D^{25} = +44$  ( $c = 0.029$ ,  $\text{CHCl}_3$ );  $^1\text{H NMR}$  (500 MHz,  $\text{CDCl}_3$ )  $\delta$  8.30–8.26 (m, 1H), 8.22–8.17 (m, 1H), 7.76 (d,  $J = 8.0$  Hz, 1H), 7.65–7.38 (m, 5H), 7.20–7.14 (m, 3H), 7.12–7.06 (m, 1H), 7.06–7.02 (m, 1H), 3.99 (s, 3H), 1.96 (s, 3H), 1.31 (s, 9H);  $^{13}\text{C NMR}$  (126

**MHz,  $\text{CDCl}_3$ )  $\delta$  158.7, 157.1, 155.1, 145.9, 140.6, 138.3, 137.0, 135.5, 134.5, 133.8, 132.3, 132.2, 128.0, 127.4, 126.6, 126.1, 126.0, 125.9, 119.5, 114.4, 80.1, 55.9, 27.9, 18.5; IR (KBr)  $\nu_{\text{max}}$  2974, 2931, 1662, 1452, 1366, 1247, 1148  $\text{cm}^{-1}$ ; HRMS (ESI) for  $\text{C}_{28}\text{H}_{28}\text{N}_2\text{NaO}_4\text{S}^+$  ( $\text{M}+\text{Na}$ ) $^+$ : calcd. 511.1662, found 511.1672; HPLC condition: Phenomenex Chiralpak Amylose2, n-hexane/*i*-PrOH = 50/50, Flow rate = 0.7 mL/min, UV = 254 nm,  $t_R = 11.7$  min (major) and  $t_R = 16.7$  min (minor).**

**(R)-N-Boc-protected 2-(3-methoxyphenylsulfonimidoyl)-3-methylpyridine (1b):**

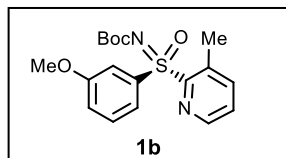

**1b:** 37 mg, 51% yield, 71% ee;  $[\alpha]_D^{25} = -31.28$  ( $c = 0.186$ ,  $\text{CHCl}_3$ ); HPLC condition: Daicel IG-3, MeOH, Flow rate = 0.5 mL/min, UV = 254 nm,  $t_R = 10.7$  min (major) and  $t_R = 15.4$  min (minor).

**(S)-N-Boc-protected methylpyridine (5i): 2-(4-ethoxy-4'-(trifluoromethyl)-[1,1'-biphenyl]-2-sulfonimidoyl)-3-**

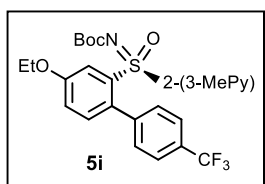

**5i:** 36 mg, 35% yield, 99% ee, colorless solid,  $[\alpha]_D^{25} = +46.23$  ( $c = 0.334$ ,  $\text{CHCl}_3$ );  $^1\text{H NMR}$  (500 MHz,  $\text{CDCl}_3$ )  $\delta$  8.23–8.18 (m, 2H), 7.39–7.30 (m, 3H), 7.20 (dd,  $J = 7.5, 4.5$  Hz, 1H), 7.14 (dd,  $J = 8.25, 2.75$  Hz, 1H), 7.10–6.70 (m, 3H), 4.20 (q,  $J = 7.0$  Hz, 2H), 2.29 (s, 3H), 1.47 (t,  $J = 7.0$  Hz, 3H), 1.32 (s, 9H);  $^{13}\text{C NMR}$  (126

**MHz,  $\text{CDCl}_3$ )  $\delta$  158.5, 157.0, 154.9, 146.0, 141.9, 140.9, 138.0, 136.5, 133.3, 132.7, 130.3, 129.4 (q,  $J = 32$  Hz), 126.3, 124.03 (q,  $J = 274$  Hz), 123.97 (q,  $J = 6.0$  Hz), 119.7, 115.5, 80.3, 64.3, 27.9, 18.8, 14.7;  $^{19}\text{F NMR}$  (471 MHz,  $\text{CDCl}_3$ )  $\delta$  -62.7; HRMS (ESI) for  $\text{C}_{26}\text{H}_{27}\text{F}_3\text{N}_2\text{NaO}_4\text{S}^+$  ( $\text{M}+\text{Na}$ ) $^+$ : calcd. 543.1536, found 543.1544; IR (KBr)  $\nu_{\text{max}}$  2974, 1662, 1325, 1270, 1246, 1072, 1042  $\text{cm}^{-1}$ ; HPLC condition: Phenomenex Chiralpak Amylose2, n-hexane/*i*-PrOH = 85/15, Flow rate = 0.4 mL/min, UV = 254 nm,  $t_R = 21.4$  min (major) and  $t_R = 35.0$  min (minor).**

**(R)-N-Boc-protected 2-(3-ethoxyphenylsulfonimidoyl)-3-methylpyridine (1f):**

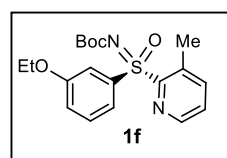

**1f:** 36 mg, 48% yield, 68% ee;  $[\alpha]_D^{25} = -20.8$  ( $c = 0.221$ ,  $\text{CHCl}_3$ ); HPLC condition: Daicel IG-3, MeOH, Flow rate = 0.5 mL/min, UV = 254 nm,  $t_R = 13.2$  min (minor) and  $t_R = 26.5$  min (major).

**(S)-N-Boc-protected 3-methyl-2-(3-(*p*-tolyl)naphthalene-2-sulfonimidoyl)pyridine (5j):**

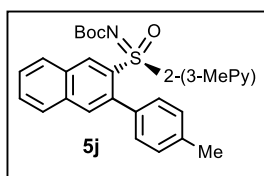

**5j:** 40 mg, 42% yield, 94% ee, colorless solid,  $[\alpha]_D^{25} = +220$  ( $c = 0.006$ ,  $\text{CHCl}_3$ );

**$^1\text{H}$  NMR (500 MHz,  $\text{CDCl}_3$ )**  $\delta$  9.33 (s, 1H), 8.18 (dd,  $J = 4.5, 1.0$  Hz, 1H), 8.12

(d,  $J = 8.0$  Hz, 1H), 7.80 (d,  $J = 7.5$  Hz, 1H), 7.68–7.58 (m, 3H), 7.35–7.30 (m,

1H), 7.17 (dd,  $J = 8.0, 4.5$  Hz, 1H), 7.10–6.52 (m, 4H), 2.32 (s, 3H), 2.29 (s, 3H), 1.35 (s, 9H);  **$^{13}\text{C}$  NMR**

**(101 MHz,  $\text{CDCl}_3$ )**  $\delta$  157.2, 155.0, 145.9, 140.7, 137.4, 137.3, 137.0, 135.3, 134.7, 134.6, 132.10, 132.07,

131.0, 129.7, 129.4, 127.7, 127.35, 127.28, 126.0, 80.1, 28.0, 21.1, 18.9 (1 carbon overlapped); **IR (KBr)**

$\nu_{\text{max}}$  2971, 1662, 1275, 1248, 1151, 1060, 890  $\text{cm}^{-1}$ ; **HRMS (ESI)** for  $\text{C}_{28}\text{H}_{29}\text{N}_2\text{O}_3\text{S}^+$  ( $\text{M}+\text{H}$ ) $^+$ : calcd.

473.1893, found 473.1896; **HPLC condition:** YMC Amylose C-neo, n-hexane/*i*-PrOH = 70/30, Flow

rate = 0.4 mL/min, UV = 254 nm,  $t_R = 21.8$  min (minor) and  $t_R = 24.3$  min (major).

**(R)-N-Boc-protected 3-methyl-2-(naphthalene-2-sulfonimidoyl)pyridine (1j):**

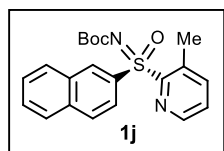

**1j:** 31 mg, 41% yield, 91% ee;  $[\alpha]_D^{25} = -35.90$  ( $c = 0.078$ ,  $\text{CHCl}_3$ ); **HPLC condition:**

Daicel IG-3, MeOH, Flow rate = 0.7 mL/min, UV = 254 nm,  $t_R = 9.6$  min (minor).

and  $t_R = 29.4$  min (major).

**(S)-N-Boc-protected 2-(3,4'-dimethyl-[1,1'-biphenyl]-2-sulfonimidoyl)pyridine (5k):**

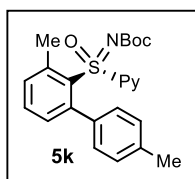

**5k:** 21 mg, 25% yield, 87% ee, colorless solid,  $[\alpha]_D^{25} = -17.31$  ( $c = 0.35$ ,  $\text{CHCl}_3$ );  **$^1\text{H}$**

**NMR (500 MHz,  $\text{CDCl}_3$ )**  $\delta$  8.55–8.49 (m, 1H), 7.65 (d,  $J = 8.0$  Hz, 1H), 7.53–7.46 (m,

1H), 7.41 (t,  $J = 7.5$  Hz, 1H), 7.37–7.28 (m, 2H), 7.15 (d,  $J = 7.0$  Hz, 1H), 7.07 (d,  $J =$

7.5 Hz, 1H), 6.99–6.94 (m, 1H), 6.64 (d,  $J = 8.0$  Hz, 1H), 6.27 (d,  $J = 8.0$  Hz, 1H), 2.93

(s, 3H), 2.29 (m, 3H), 1.41 (s, 9H);  **$^{13}\text{C}$  NMR (101 MHz,  $\text{CDCl}_3$ )**  $\delta$  158.3, 156.8, 149.6, 143.0, 142.7,

137.0, 136.9, 136.7, 134.9, 132.8, 131.7, 131.1, 130.0, 128.2, 127.8, 127.5, 126.3, 123.0, 80.2, 28.1, 23.4,

21.1; **HRMS (ESI)** for  $\text{C}_{24}\text{H}_{27}\text{N}_2\text{O}_3\text{S}^+$  ( $\text{M}+\text{H}$ ) $^+$ : calcd. 423.1737, found 423.1747; **HPLC condition:**

Phenomenex Chiralpak Amylose2, n-hexane/*i*-PrOH = 85/15, Flow rate = 0.7 mL/min, UV = 254 nm,  $t_R$

= 24.8 min (minor) and  $t_R = 29.2$  min (major)

**(R)-N-Boc-protected 2-(2-methylphenylsulfonimidoyl) pyridine (1k):**

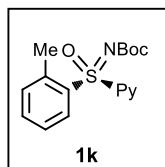

**1k:** 30 mg, 46% yield, 41% ee;  $[\alpha]_D^{25} = 8.0$  ( $c = 0.166$ ,  $\text{CHCl}_3$ ); **HPLC condition:** Daicel

IG-3, MeOH, Flow rate = 0.5 mL/min, UV = 254 nm,  $t_R = 10.5$  min (major) and  $t_R = 14.1$

min (minor).

**(S)-N-Boc-protected 2-(3-methyl-4'-(trifluoromethyl)-[1,1'-biphenyl]-2-sulfonimidoyl) pyridine (5l):**

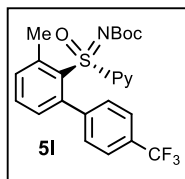

**5l:** 28 mg, 29% yield, 86% ee, colorless solid,  $[\alpha]_{\text{D}}^{25} = -81.68$  ( $c = 0.214$ ,  $\text{CHCl}_3$ ); **<sup>1</sup>H NMR (500 MHz, CDCl<sub>3</sub>)**  $\delta$  8.56 (d,  $J = 4.0$  Hz, 1H), 7.83 (d,  $J = 8.0$  Hz, 1H), 7.64–7.57 (m, 1H), 7.56–7.51 (m, 1H), 7.50–7.43 (m, 2H), 7.42–7.35 (m, 2H), 7.21 (d,  $J = 8.0$  Hz, 1H), 7.0 (d,  $J = 7.5$  Hz, 1H), 6.79 (d,  $J = 8.0$  Hz, 1H), 2.81 (s, 3H), 1.39 (s, 9H); **<sup>19</sup>F NMR (376 MHz, CDCl<sub>3</sub>)**  $\delta$  -62.49; **<sup>13</sup>C NMR (101 MHz, CDCl<sub>3</sub>)**  $\delta$  158.0, 156.7, 149.8, 144.0, 142.2, 142.1, 137.5, 134.4, 133.4, 132.0, 130.8, 130.0, 129.0 (q,  $J = 32$  Hz), 128.9, 126.8, 124.0 (q,  $J = 272$  Hz), 123.8 (q,  $J = 3.8$  Hz), 122.8, 80.5, 28.0, 23.1 (one peak missing); **IR (KBr)**  $\nu_{\text{max}}$  2979, 2938, 1660, 1279, 1243, 1156, 1120  $\text{cm}^{-1}$ ; **HRMS (ESI)** for  $\text{C}_{24}\text{H}_{23}\text{F}_3\text{N}_2\text{NaO}_3\text{S}^+$  ( $\text{M}+\text{Na}$ )<sup>+</sup>: calcd. 499.1274, found 499.1283; **HPLC condition:** Phenomenex Chiralpak Amylose2, n-hexane/*i*-PrOH =90/10, Flow rate = 0.6 mL/min, UV = 254 nm,  $t_{\text{R}} = 23.7$  min (minor) and  $t_{\text{R}} = 27.8$  min (major).

**(R)-N-Boc-protected 2-(2-methylphenylsulfonimidoyl) pyridine (1k):**

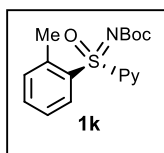

**1k:** 33mg, 49% yield, 50% ee;  $[\alpha]_{\text{D}}^{25} = +12.63$  ( $c = 0.41$ ,  $\text{CHCl}_3$ ); **HPLC condition:** Daicel IG-3, MeOH, Flow rate = 0.3 mL/min, UV = 254 nm,  $t_{\text{R}} = 10.4$  min (major) and  $t_{\text{R}} = 14.0$  min (minor).

**(S)-N-Boc-protected 1-(3'-methyl-2'-(pyridine-2-sulfonimidoyl)-[1,1'-biphenyl]-4-yl) ethanone (5m):**

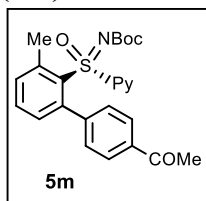

**5m:** 30 mg, 33% yield, 84% ee, colorless solid,  $[\alpha]_{\text{D}}^{25} = -22.91$  ( $c = 0.213$ ,  $\text{CHCl}_3$ ); **<sup>1</sup>H NMR (500 MHz, CDCl<sub>3</sub>)**  $\delta$  8.60–8.55 (m, 1H), 7.92–7.83 (m, 2H), 7.66–7.57 (m, 2H), 7.50–7.34 (m, 4H), 7.04–6.99 (m, 1H), 6.84–6.79 (m, 1H), 2.79 (s, 3H), 2.59 (s, 3H), 1.39 (s, 9H); **<sup>13</sup>C NMR (126 MHz, CDCl<sub>3</sub>)**  $\delta$  197.7, 158.2, 156.6, 149.8, 145.5,

142.9, 142.0, 137.5, 135.5, 134.4, 133.3, 132.0, 130.7, 129.8, 128.8, 127.05, 126.96, 126.8, 122.9, 80.5, 28.0, 26.6, 23.1; **IR (KBr)**  $\nu_{\text{max}}$  2974, 1673, 1646, 1280, 1237, 1111, 890  $\text{cm}^{-1}$ ; **HRMS (ESI)** for  $\text{C}_{25}\text{H}_{26}\text{N}_2\text{NaO}_4\text{S}^+$  ( $\text{M}+\text{Na}$ )<sup>+</sup>: calcd. 473.1505, found 473.1515; **HPLC condition:** YMC Amylose C-neo, n-hexane/*i*-PrOH = 50/50, Flow rate = 0.5 mL/min, UV = 254 nm,  $t_{\text{R}} = 9.7$  min (minor) and  $t_{\text{R}} = 11.8$  min (major).

**(R)-N-Boc-protected 2-(2-methylphenylsulfonimidoyl)pyridine(1k):**

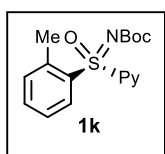

**1k:** 32 mg, 48% yield, 51% ee;  $[\alpha]_{\text{D}}^{25} = +14.63$  ( $c = 0.45$ ,  $\text{CHCl}_3$ ); **HPLC condition:** Daicel IG-3, MeOH, Flow rate = 0.5 mL/min, UV = 254 nm,  $t_{\text{R}} = 10.9$  min (major) and  $t_{\text{R}} = 14.5$  min (minor).

**(S)-N-Boc-protected 2-(5-fluoro-3-methyl-4'-(trifluoromethyl)-[1,1'-biphenyl]-2-sulfonimidoyl)pyridine (5n):**

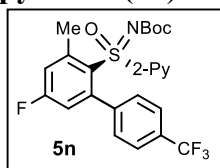

**5n:** 22 mg, 22% yield, 89% ee, colorless solid,  $[\alpha]_D^{25} = -79.78$  ( $c = 0.275$ ,  $\text{CHCl}_3$ );

**$^1\text{H}$  NMR (400 MHz,  $\text{CDCl}_3$ )**  $\delta$  8.56 (dd,  $J = 4.2, 0.6$  Hz, 1H), 7.83 (d,  $J = 8.0$  Hz,

1H), 7.63 (td,  $J = 7.8, 1.7$  Hz, 1H), 7.57–7.52 (m, 1H), 7.45–7.43 (m, 1H), 7.43–7.37

(m, 1H), 7.23 (d,  $J = 8.0$  Hz, 1H), 7.09 (dd,  $J = 8.8, 2.8$  Hz, 1H), 6.81 (d,  $J = 8.0$  Hz, 1H), 6.74 (dd,  $J =$

8.4, 2.8 Hz, 1H), 2.79 (s, 3H), 1.41 (s, 9H);  **$^{13}\text{C}$  NMR (101 MHz,  $\text{CDCl}_3$ )**  $\delta$  164.6, 162.1, 157.9, 156.7,

149.8, 145.9, 145.8, 145.3, 145.2, 143.0, 137.6, 134.9, 130.4, 130.37, 130.0, 129.7, 129.67, 129.3, 129.0,

128.7, 128.0, 126.9, 125.3, 124.2, 124.0, 123.97, 123.9, 122.8, 122.6, 120.0, 119.9, 119.8, 118.0, 117.7,

80.6, 28.0, 24.8, 23.4; IR (KBr)  $\nu_{\text{max}}$  3070, 2931, 1657, 1581, 1322, 1282, 1126  $\text{cm}^{-1}$ ;  **$^{19}\text{F}$  NMR (376**

**MHz,  $\text{CDCl}_3$ )**  $\delta$  -62.59, -106.89; **HRMS (ESI)** for  $\text{C}_{24}\text{H}_{22}\text{F}_4\text{N}_2\text{NaO}_3\text{S}^+$  ( $\text{M}+\text{Na}$ ) $^+$ : calcd. 517.1179,

found 517.1190; **HPLC condition:** Phenomenex Chiralpak Amylose2, n-hexane/*i*-PrOH = 90/10, Flow

rate = 0.7 mL/min, UV = 254 nm,  $t_R = 16.1$  min (minor) and  $t_R = 18.8$  min (major).

**(R)-N-Boc-protected 2-(4-fluoro-2-methylphenylsulfonimidoyl)pyridine(1l):**

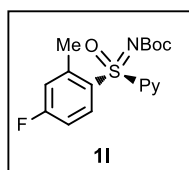

**1l:** 36 mg, 51% yield, 37% ee;  $[\alpha]_D^{25} = +10.23$  ( $c = 0.088$ ,  $\text{CHCl}_3$ ); **HPLC condition:**

Daicel IG-3, MeOH, Flow rate = 0.5 mL/min, UV = 254 nm,  $t_R = 10.2$  min (major) and

$t_R = 12.9$  min (minor).

**2.7 Synthesis of chiral sulfoximine 6 (GP-5):**

Chiral (*R*)-**1b** (0.2 mmol, 1.0 equiv) was dissolved in  $\text{CH}_2\text{Cl}_2$  (2.0 mL) and TFA (10.0 equiv) was added.

The mixture was stirred at 70 °C for 3 h. After concentration, the resulting residue was purified by flash

column using hexane/EtOAc as the eluent to afford the desired product **6**.

**(R)-2-(3-Methoxyphenylsulfonimidoyl)pyridine (6):**

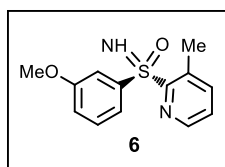

**6:** 46 mg, 88% yield, 95% ee, colorless viscous liquid,  $[\alpha]_D^{25} = -42.2$  ( $c = 0.14$ ,

$\text{CHCl}_3$ );  **$^1\text{H}$  NMR (500 MHz,  $\text{CDCl}_3$ )**  $\delta$  8.48 (d,  $J = 4.5$  Hz, 1H), 7.62–7.56 (m, 2H),

7.52 (t,  $J = 2.25$  Hz, 1H), 7.40 (d,  $J = 8.0$  Hz, 1H), 7.39–7.32 (m, 1H), 7.10 (dd,  $J =$

8.25, 2.25 Hz, 1H), 3.83 (s, 3H), 2.53 (s, 3H);  **$^{13}\text{C}$  NMR (126 MHz,  $\text{CDCl}_3$ )**  $\delta$  158.7, 156.0, 145.2, 140.9,

140.5, 132.2, 128.7, 125.8, 120.5, 118.6, 112.6, 54.7, 18.2; IR (KBr)  $\nu_{\text{max}}$  3028, 2969, 1738, 1366, 1229,

1216  $\text{cm}^{-1}$ ; **HRMS (ESI)** for  $\text{C}_{13}\text{H}_{15}\text{N}_2\text{O}_2\text{S}^+$  ( $\text{M}+\text{H}$ ) $^+$ : calcd. 263.0849, found 263.0858; **HPLC**

**condition:** IH-3, MeOH/DEA = 99.9/0.1, Flow rate = 0.5 mL/min, UV = 254 nm,  $t_R = 9.4$  min (major)

and  $t_R = 10.2$  min (minor).

## 2.8 Synthesis of chiral sulfoxide 7 (GP-6):

Chiral (*R*)-6 (0.2 mmol, 1.0 equiv) was dissolved in CHCl<sub>3</sub> (2.0 mL) under air and <sup>t</sup>BuONO (1.1 equiv) was added. The mixture was stirred at rt for 2 h. After concentration, the resulting residue was purified by preparative TLC using hexane/EtOAc as the eluent to afford the desired product 7.

### (*R*)- 2-((3-Methoxyphenyl)sulfinyl)pyridine (7):

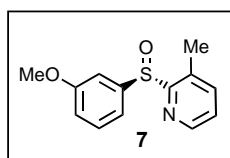

**7:** 39 mg, 78% yield, 90% ee, colorless viscous liquid,  $[\alpha]_D^{25} = -63$  ( $c = 0.13$ , CHCl<sub>3</sub>);

**<sup>1</sup>H NMR (500 MHz, CDCl<sub>3</sub>)**  $\delta$  8.47–8.40 (m, 1H), 7.25–7.18 (m, 2H), 7.18–7.08 (m, 2H), 6.88–7.80 (m, 1H), 3.68 (s, 3H), 2.37 (s, 3H); **<sup>13</sup>C NMR (126 MHz, CDCl<sub>3</sub>)**

$\delta$  160.5, 159.9, 147.5, 144.3, 139.8, 132.9, 129.7, 125.0, 117.04, 116.97, 109.4, 55.2, 16.5; IR (KBr)  $\nu_{\max}$  3456, 2925, 1592, 1479, 1283, 1245, 1038 cm<sup>-1</sup>; **HRMS (ESI)** for C<sub>13</sub>H<sub>13</sub>NNaO<sub>2</sub>S<sup>+</sup> (M+Na)<sup>+</sup>: calcd. 270.0559, found 270.0570; **HPLC condition:** IC-3, MeOH, Flow rate = 0.5 mL/min, UV = 254 nm, tR = 14.0 min (major) and tR = 14.8 min (minor).

## 2.9 Synthesis of Michael product 8 (GP-7):

Chiral (*R*)-3c (0.2 mmol, 1.0 equiv) was dissolved in CH<sub>2</sub>Cl<sub>2</sub> (2.0 mL) and TFA (10.0 equiv) was added. The mixture was stirred at 70 °C for 3 h. After concentration, the resulting residue was purified by flash column using hexane/EtOAc as the eluent to afford the desired product 8.

### Methyl 2-((1*S*)-6-methoxy-1-(3-methylpyridin-2-yl)-1-oxidobenzo[d]isothiazol-3-yl)acetate (8):

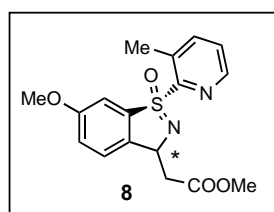

**8:** 46 mg, 66% yield, 95% ee, colorless viscous liquid.  $[\alpha]_D^{25} = +47.3$  ( $c = 0.114$ , CHCl<sub>3</sub>); **<sup>1</sup>H NMR (500 MHz, CDCl<sub>3</sub>)** 8.34–8.29 (m, 1H), 7.63 (dd,  $J = 7.75, 0.75$  Hz, 1H), 7.40 (d,  $J = 8.0$  Hz, 1H), 7.28 (dd,  $J = 7.5, 4.5$  Hz, 1H), 7.18–7.12 (m, 2H), 5.29 (t,  $J = 1.5$  Hz, 1H), 3.80 (s, 3H), 3.71 (s, 3H), 2.89 (dd,  $J = 6.75, 3.25$

Hz, 2H), 2.66 (s, 3H); **<sup>13</sup>C NMR (126 MHz, CDCl<sub>3</sub>)**  $\delta$  171.7, 160.2, 156.9, 146.2, 141.4, 141.1, 137.9, 133.1, 126.0, 124.1, 121.0, 106.5, 65.3, 55.8, 51.7, 43.1, 18.9; IR (KBr)  $\nu_{\max}$  2969, 2360, 2340, 1736, 1264, 1231, 1039 cm<sup>-1</sup>; **HRMS (ESI)** for C<sub>17</sub>H<sub>19</sub>N<sub>2</sub>O<sub>4</sub>S<sup>+</sup> (M+H)<sup>+</sup>: calcd. 347.1060, found 347.1070; **HPLC condition:** IG-3, MeOH, Flow rate = 0.3 mL/min, UV = 254 nm, tR = 22.8 min (major) and tR = 30.4 min (minor).

## 2.10 Synthesis of thiazine 9 (GP-8):

Chiral (*R*)-5d (0.2 mmol, 1.0 equiv) was dissolved in CH<sub>2</sub>Cl<sub>2</sub> (2.0 mL) and TFA (10.0 equiv) was added. The mixture was stirred at 70 °C for 1 h. After basic work-up followed by concentration, the crude was further subjected with Pd(OAc)<sub>2</sub> (10 mol%), PhI(OAc)<sub>2</sub> (2.0 equiv) in toluene at 75 °C for 12 h. Next the crude was purified by flash column using hexane/EtOAc as the eluent to afford the desired product 9.

**(S)-8-fluoro-3-methoxy-5-(3-methylpyridin-2-yl)dibenzo[*c,e*][1,2]thiazine 5-oxide (9):**

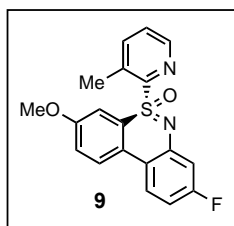

**9:** 44 mg, 62% yield, 93% ee, colorless viscous liquid.  $[\alpha]_D^{25} = +63.1$  ( $c = 0.014$ ,  $\text{CHCl}_3$ );  $^1\text{H NMR}$  (500 MHz,  $\text{CDCl}_3$ ) 8.50 (d,  $J = 4.5$  Hz, 1H), 8.08 (d,  $J = 9.0$  Hz, 1H), 7.93 (dd,  $J = 9.0, 6.0$  Hz, 1H), 7.66 (d,  $J = 7.5$  Hz, 1H), 7.39 (dd,  $J = 7.5, 4.5$  Hz, 1H), 7.30 (dd,  $J = 9.0, 2.5$  Hz, 1H), 6.99 (d,  $J = 2.5$  Hz, 1H), 6.92 (dd,  $J = 10.5, 2.5$  Hz, 1H), 6.83–6.75 (m, 1H), 3.76 (s, 3H), 2.38 (s, 3H);  $^{13}\text{C NMR}$  (101 MHz,  $\text{CDCl}_3$ )  $\delta$  163.5 (d,  $J = 247$  Hz), 158.7, 155.1, 146.5, 143.7 (d,  $J = 12$  Hz), 141.9, 134.3, 128.4, 127.0, 124.8, 124.4 (d,  $J = 10$  Hz), 123.2, 122.0, 113.5, 110.7 (d,  $J = 23$  Hz), 108.7 (d,  $J = 22$  Hz), 108.3, 55.7, 19.0; IR (KBr)  $\nu_{\text{max}}$  2940, 2350, 2230, 1213, 1201, 1019  $\text{cm}^{-1}$ ;  $^{19}\text{F NMR}$  (471 MHz,  $\text{CDCl}_3$ )  $\delta$  -111.99; **HPLC condition:** IH-3, MeOH, Flow rate = 0.4 mL/min, UV = 254 nm,  $t_R = 15.1$  min (major) and  $t_R = 15.8$  min (minor).

**X-ray crystallography:** Single crystal X-ray data for the compound **5h** was collected using the Bruker D8 Quest CMOS detector system [ $\lambda(\text{Mo-K}\alpha) = 0.71073$  Å] at 299K, graphite monochromator with a  $\omega$  scan width of 0.3 $^\circ$ , crystal-detector distance 60 mm, collimator 0.5 mm. The SMART software<sup>3</sup> was used for the intensity data acquisition and the SAINTPLUS Software was S23 used for the data extraction. In each case, absorption correction was performed with the help of SADABS program,<sup>3</sup> an empirical absorption correction using equivalent reflections was performed with the program. The structure was solved using SHELXS-97,<sup>4</sup> and full-matrix least-squares refinement against F<sup>2</sup> was carried out using SHELXL-97.<sup>4</sup> All non-hydrogen atoms were refined anisotropically. Aromatic and methyl hydrogens were introduced on calculated positions and included in the refinement riding on their respective parent atoms.

Absolute configuration of **5h** and **3l** have been determined from the diffraction measurement Flack 0.02(4) and 0.04(5) respectively.

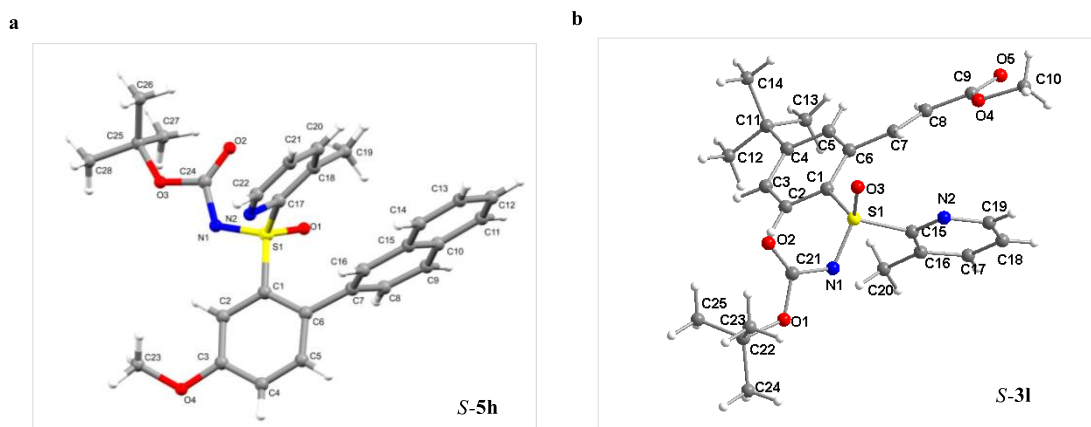

**Figure S1.** Thermal ellipsoidal plot of compound **5h** and **3l** with atom labeling scheme. Displacement ellipsoids are drawn at 50% probability level except for the H atoms, which are shown as circles of arbitrary radius.

**Table S10. Crystal data for 5h**

| Identification code                         | <b>5h</b>                                                       |
|---------------------------------------------|-----------------------------------------------------------------|
| Formula                                     | C <sub>28</sub> H <sub>28</sub> N <sub>2</sub> O <sub>4</sub> S |
| Fw                                          | 488.58                                                          |
| T (K)                                       | 292                                                             |
| $\lambda$ (Å)                               | 0.71073                                                         |
| Crystal system                              | Monoclinic                                                      |
| Space group                                 | P 6 <sub>1</sub>                                                |
| a(Å)                                        | 22.7073(5)                                                      |
| b (Å)                                       | 22.7073(5)                                                      |
| c (Å)                                       | 9.0908(2)                                                       |
| $\alpha$ (°)                                | 90                                                              |
| $\beta$ (°)                                 | 90                                                              |
| $\gamma$ (°)                                | 120                                                             |
| V (Å <sup>3</sup> )                         | 4059.4(2)                                                       |
| Z                                           | 6                                                               |
| $\rho_{\text{calcd}}$ (Mg m <sup>-3</sup> ) | 1.199                                                           |
| $\mu$ (mm <sup>-1</sup> )                   | 0.154                                                           |
| F(000)                                      | 1548                                                            |
| Reflections collected                       | 5690                                                            |
| Unique reflections                          | 3797                                                            |
| Completeness (%)                            | 99.93                                                           |
| T <sub>max</sub> , T <sub>min</sub>         | 1.000, 0.673                                                    |
| GOF (F <sup>2</sup> )                       | 1.015                                                           |
| R1[I>2 $\sigma$ (I)]                        | 0.0519                                                          |
| wR2 (all data)                              | 0.1450( 5690)                                                   |
| Flack                                       | 0.02(4)                                                         |
| CCDC Number                                 | 2088890                                                         |

**Table S11. Crystal data for 3l**

| Identification code | <b>3l</b>                                                       |
|---------------------|-----------------------------------------------------------------|
| Formula             | C <sub>25</sub> H <sub>32</sub> N <sub>2</sub> O <sub>5</sub> S |
| Fw                  | 472.58                                                          |
| T (K)               | 111K                                                            |
| $\lambda$ (Å)       | 0.71073                                                         |
| Crystal system      | Orthorhombic                                                    |
| Space group         | P 2 <sub>1</sub> 2 <sub>1</sub> 2 <sub>1</sub>                  |
| a(Å)                | 9.2225 (2)                                                      |
| b (Å)               | 15.1104 (3)                                                     |

|                                             |               |
|---------------------------------------------|---------------|
| $c$ (Å)                                     | 18.1484 (4)   |
| $\alpha$ (°)                                | 90            |
| $\beta$ (°)                                 | 90            |
| $\gamma$ (°)                                | 90            |
| $V$ (Å <sup>3</sup> )                       | 2529.08 (9)   |
| $Z$                                         | 4             |
| $\rho_{\text{calcd}}$ (Mg m <sup>-3</sup> ) | 1.241         |
| $\mu$ (mm <sup>-1</sup> )                   | 0.165         |
| $F(000)$                                    | 1009.0        |
| Reflections collected                       | 5105          |
| Unique reflections                          | 4889          |
| Completeness (%)                            | 99.43         |
| $T_{\text{max}}, T_{\text{min}}$            | 1.000, 0.651  |
| GOF (F <sup>2</sup> )                       | 1.035         |
| $R1[I > 2\sigma(I)]$                        | 0.0298        |
| wR2 (all data)                              | 0.0749( 5105) |
| Flack                                       | 0.04(5)       |
| CCDC Number                                 | 2109210       |

### Density Functional Theory (DFT) Calculations:

Density-functional theory (DFT) calculations were performed using the Gaussian16 software<sup>5</sup> to understand the origin of this chiral resolution (Figure S2a). To diminish computational costs, we selected the simplest experimentally tested system, **1a**. We carried out geometry optimizations with the recently developed MN15 functional<sup>6</sup> coupled with the def2-TZVPPD basis set for Pd and the def2-SVP basis set for the other atoms.<sup>7-9</sup> This functional has proved to provide much better energetic values for the reaction barriers in transition metal catalysis than other commonly employed ones.<sup>6</sup> Effects of DCE as solvent on the Gibbs energy profile were considered with single-point calculations using the same functional and the def2-QZVPP basis set. The Gibbs energy were evaluated at 343.15 K.

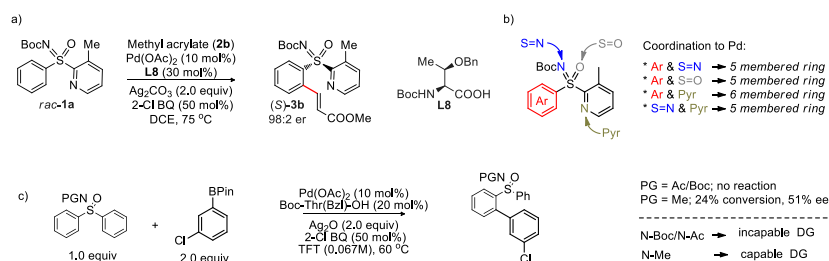

**Figure S2.** a) Selected model reaction for the computational mechanism elucidation. b) Coordination centres of the starting material **1a**. c) Comparison of directing capability of various N-protected sulfoximine imine

Since this is the study of a kinetic resolution, transition states are the most important species for the reaction path. From literature, mono-*N*-protected aminoacid (MPAA) C-H activations such as the one



presented here, follows three steps: concerted metalation-deprotonation (CMD), insertion and a  $\beta$ -hydride elimination (Fig S3). The last one has no effect on the chiral outcome of the reaction. The CMD is a key step, since once the C-Pd bond is formed, the absolute configuration of the sulfur atom of the sulfoximine group in the unreacted substrate and in the reaction product gets defined. This concept has been presented as the relay of chirality from MPAA by Zhang, Yu and Wu.<sup>10</sup> The challenge in this scenario lies in the different coordination centers the sulfoximine substrate **1a** offers to the metal center (Fig S2b). In addition to the aryl group where the C-H activation takes place, there are three other possible coordination sites: S=N (**int-1<sub>S=N</sub>**) or S=O (**int-1<sub>S=O</sub>**) groups from the sulfoximine functionality, which form a five-membered palladacycle, and the pyridyl group (**int-1<sub>PyR</sub>**), which gives rise to a 6-membered ring. It should be underlined that at ground state, every directing groups can be interconverted by rotation of a dihedral angle.

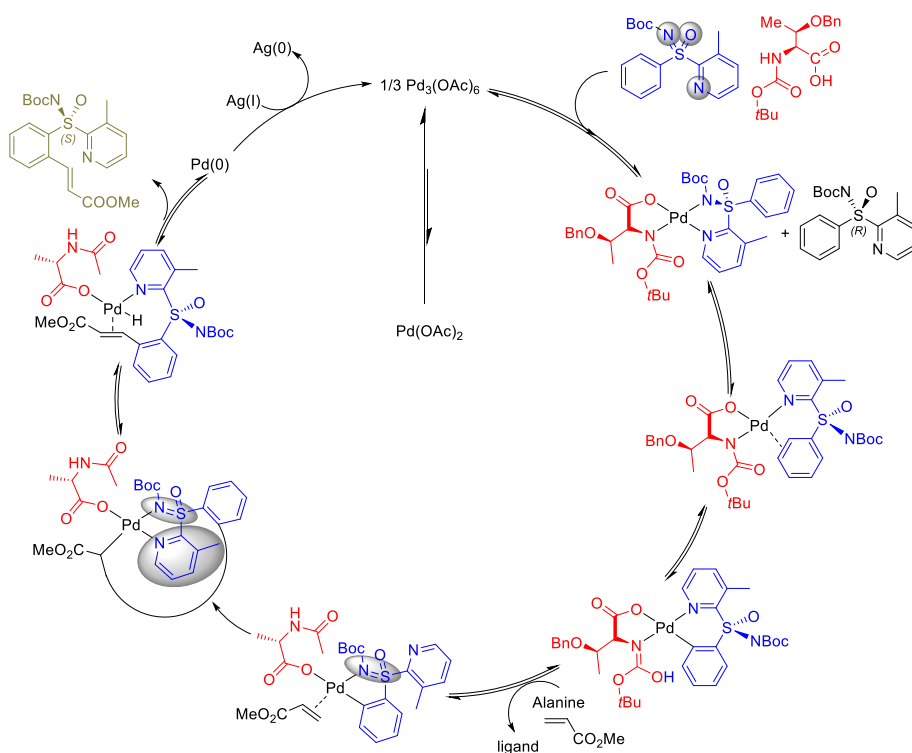

**Figure S3.** Mechanistic proposal for the kinetic resolution of sulfoximine.

The MPAA is known to lower the energy barrier of the CMD step by coordination to the metal center, forming a semi planar five membered ring (*vide infra*).<sup>11</sup> With the additional coordination of both nitrogen atoms available in the sulfoximine substrate **1a**, **int-0** is formed after displacement of 2 molecules of acetic acid. This intermediate is energetically favored, with the *S* configuration being 1.0 kcal/mol more stable than the *R* isomer. Consecutively, the aryl group should coordinate to Pd prior to the deprotonation, in a *cis* relationship with the MPAA amino group since it serves as a base in this process through its carbamate carbonyl.<sup>11</sup> This coordination gives rise to intermediates **int-1<sub>S=N</sub>**, **int-1<sub>S=O</sub>** and **int-1<sub>PyR</sub>**

depending on the group of the sulfoximine substrate coordinated to the metal. These intermediates undergo the CMD, defining the absolute configuration of the sulfur atom. As shown in Fig S4, it was found that pyridyl is the directing group which gives the lowest energy barriers,  $\Delta\Delta G^\ddagger$  22.91 kcal/mol for the *S* isomer and  $\Delta G^\ddagger$  25.35 kcal/mol for the *R* isomer. The calculated selectivity of this directing group is in excellent agreement with experimental observations (calc. 98:2, exp. 98:2). Additionally, the thermodynamics of this step (**int-2<sub>Pyr</sub>**) highly favors the experimentally observed isomer by over 6 kcal/mol. From **int-1<sub>S=N</sub>** and **int-1<sub>S=O</sub>**, the CMD transition states lie much higher and the respective  $\Delta\Delta G^\ddagger$  do not coincide with the experimental findings.

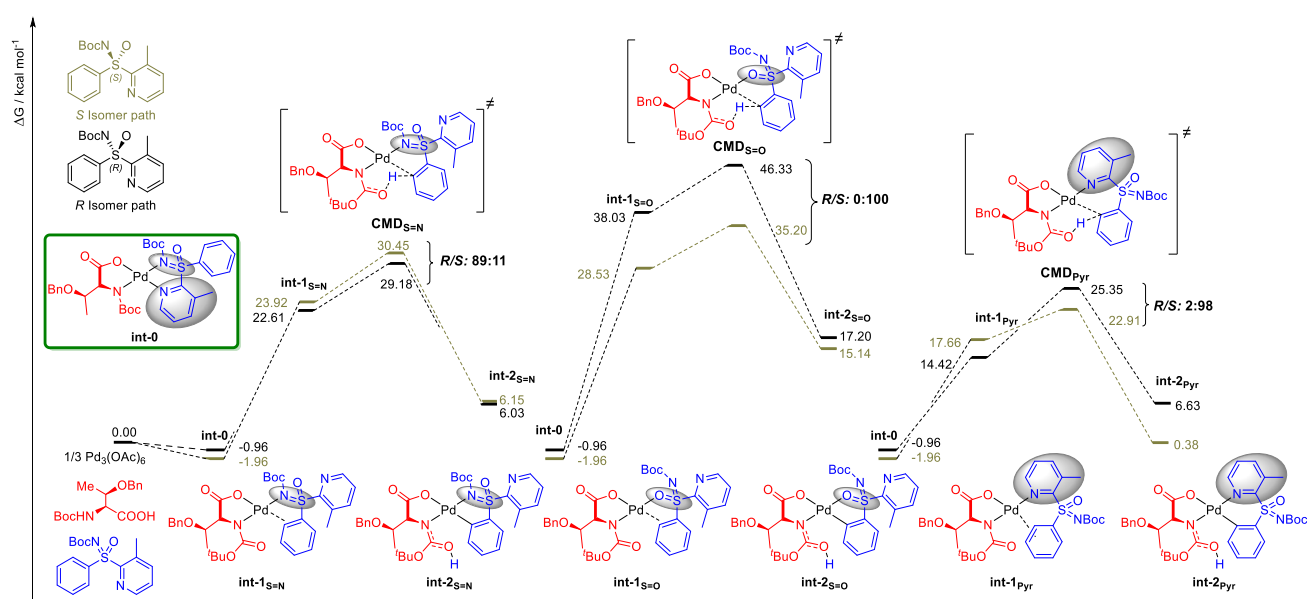

**Figure S4.** Comparison of the different energy profiles for the CMD of each possible coordination of the sulfoximine to the metal centre. Free energies at 343.15 K in DCE in kcal/mol. *R/S* selectivity highlighted at the transition state of each diagram.

The rationalization of the selectivity of the reaction can be done considering the findings of Cheng *et al*, who also focused on the CMD as determining step.<sup>10</sup> Considering the plane defined by the coordination of the MPAA to the Pd, the orientation of the bulky side chain pushes the carbamate to the other side to avoid steric interactions (for simplicity, the side chain will be defined above the plane, Fig S5). To this Pd-MPAA complex, the coordination of the phenyl group of the sulfoximine substrate can point upwards (U) or downwards (D) that plane, with any of both configurations (*R* or *S*). This translates into a total of 4 possible CMD approaches: **CMD<sub>Pyr-UR</sub>**, **CMD<sub>Pyr-US</sub>**, **CMD<sub>Pyr-DR</sub>** and **CMD<sub>Pyr-DS</sub>**. In all of them, the 6-membered cycle of the sulfoximine substrate with the Pd adopts a twisted boat conformation. In both scenarios where the phenyl group points upwards (**CMD<sub>Pyr-UR</sub>** and **CMD<sub>Pyr-US</sub>**), the sulfur atom and its substituents get located above the Pd plane. In agreement with Cheng observations, the C1-N2-Pd-O3 dihedral angle for these approaches are *ca.* -170°, which generates a higher steric interaction when

compared with the ca.  $140^\circ$  of  $\text{CMD}_{\text{Pyr-DR}}$  and  $\text{CMD}_{\text{Pyr-DS}}$ . These last transition structures also present the possibility of hydrogen bonds, making the combination of steric and electronic effects account for a difference of nearly 10 kcal/mol for each enantiomer. As can be seen in Figure S5, the geometry of the most stable transition structure for each enantiomer is very similar. The almost 2.5 kcal/mol difference between them lies in the fact that in the *R* configuration, given the size of the NBoc group, there is a steric clash with the methyl group from the pyridine moiety and in consequence with the phenyl group, causing an energetically demanding arrangement. Meanwhile, for the *S* configuration, the oxygen atom does not present such interactions. Additionally, the smaller distance of  $\text{N}\cdots\text{H}$  in comparison with  $\text{O}\cdots\text{H}$  could account with stabilizing electronic effects assisting the deprotonation. Of note, the CMD process through  $\text{int-1}_{\text{pyr}}$  is endergonic, so the calculated *R/S* ratio is only relevant if the next steps display lower free energies of activation than the  $\text{CMD}_{\text{pyr}}$  transition states.

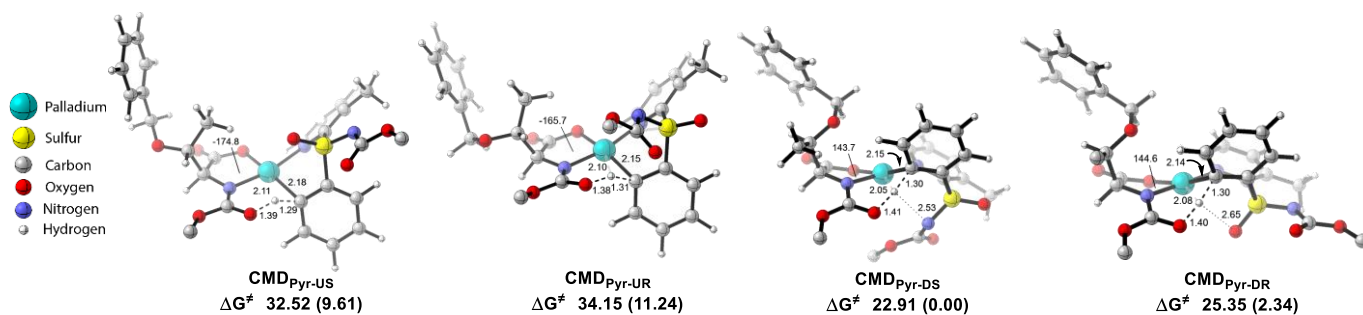

**Figure S5.** Transition structures for each  $\text{CMD}_{\text{Pyr}}$  approach. *tert*-Butyl group from NBoc removed from all models to simplify visualization. Free energies in kcal/mol, distances in Å. Free energies at 343.15 K in DCE in kcal/mol. Relative free energies in parentheses.

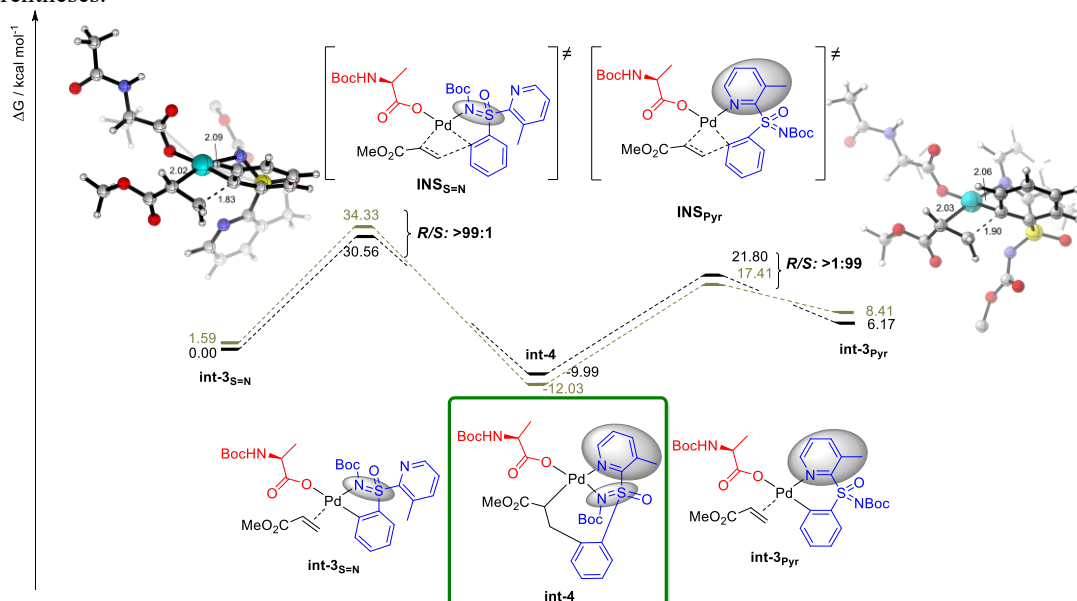

**Figure S6.** Comparison of the different energy profiles for the insertion step (INS) of the possible nitrogenated coordinations of the sulfoximine to the metal centre. Free energies at 343.15 K in DCE in kcal/mol. *R/S* selectivity highlighted at the transition state of each diagram.

To corroborate the outcome of this analysis, we studied the mechanism for the insertions step. At this stage, the MPAA is known to act as a monodentate ligand, so it has been replaced as an acetate group for modelling purposes.<sup>9,11</sup> However, since we aim to distinguish the chiral center at the sulfur atom, we employed Acetyl-*L*-Alanine as a chiral MPAA. To further simplify the model, we only considered the prochiral center of methyl acrylate as *R*. Towards the product of the insertion, we considered the coordination of pyr and N=S in the metalated sulfoximine (Figure S6).

We found that the most stable of these **int-3** systems, is the one corresponding to N=S with *S* configuration, which is higher in energy than any int-2. However, the analysis of the transition states (**INS**) revealed that, as occurred in the CMD, when pyridine acts as a directing group (**INS<sub>Pyr</sub>**), it provides the lowest energy barriers (36.08 kcal/mol for the *S* isomer and 40.47 for the *R* isomer). This gives a final selectivity >99:1, which is in perfect agreement with experimental observations (98:2). The study of this step confirms the selectivity observed at the CMD and shows the irreversibility of the reaction. Interestingly, **int-4<sub>Pyr</sub>** and **int-4<sub>N=S</sub>** present the same coordination pattern (**int-4**), since in both the two Nitrogenated groups (N=S and Pyr) are coordinated to the metal center.

Based on experimental observations and the computational results, we depicted the mechanism in Figure S7.

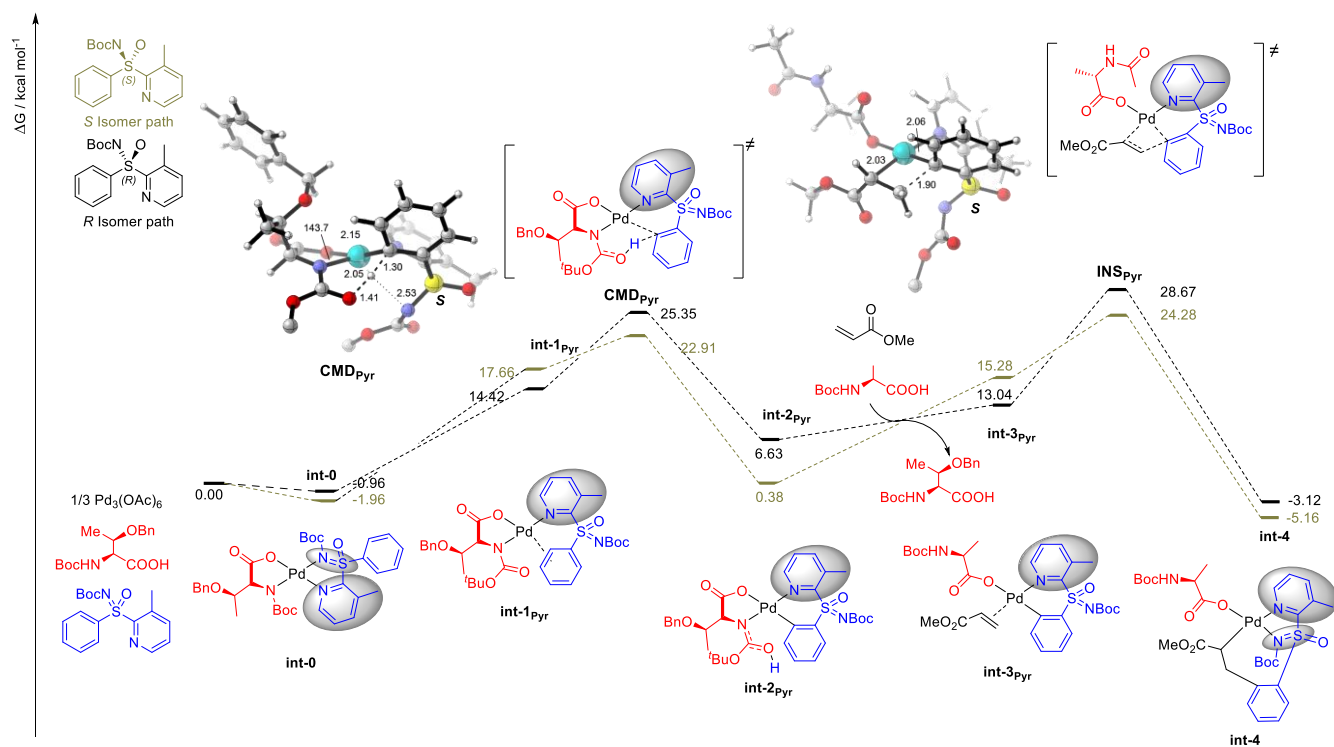

**Figure S7.** Complete free energy profile of the studied mechanism. Free energies at 343.15 K in DCE in kcal/mol

## Catalytic effect of the mono *N*-Protected aminoacid

We studied the effect of the mono *N*-protected aminoacid (MPAA) as ligand for the concerted metalation deprotonation (CMD) of the sulfoximine. To this end, we modelled the uncatalyzed reaction via the new intermediates that contain two acetate groups instead of the bidentate aminoacid (**int-1<sub>AcO</sub>**; **CMD<sub>AcO</sub>** and **int-2<sub>AcO</sub>**) as shown on Figure S8. The comparison on the effect of the MPAA is made with the coordination of the pyridyl from the sulfoximine since it is the most stable among all studied ones. Additionally, it should be mentioned that without a chirality transfer from an auxiliary ligand (MPAA for this reaction), the acetate groups are not able to provide the resolution observed in this work. As described above, the presence of a MPAA gives rise to an intermediate more stable than the starting materials. Furthermore, the intermediate where the phenyl and pyridyl group are coordinated to the metal centre is almost 15 kcal/mol more stable for the catalysed reaction. This energetic difference can also be observed at the transition state, where the difference is almost 10 kcal/mol.

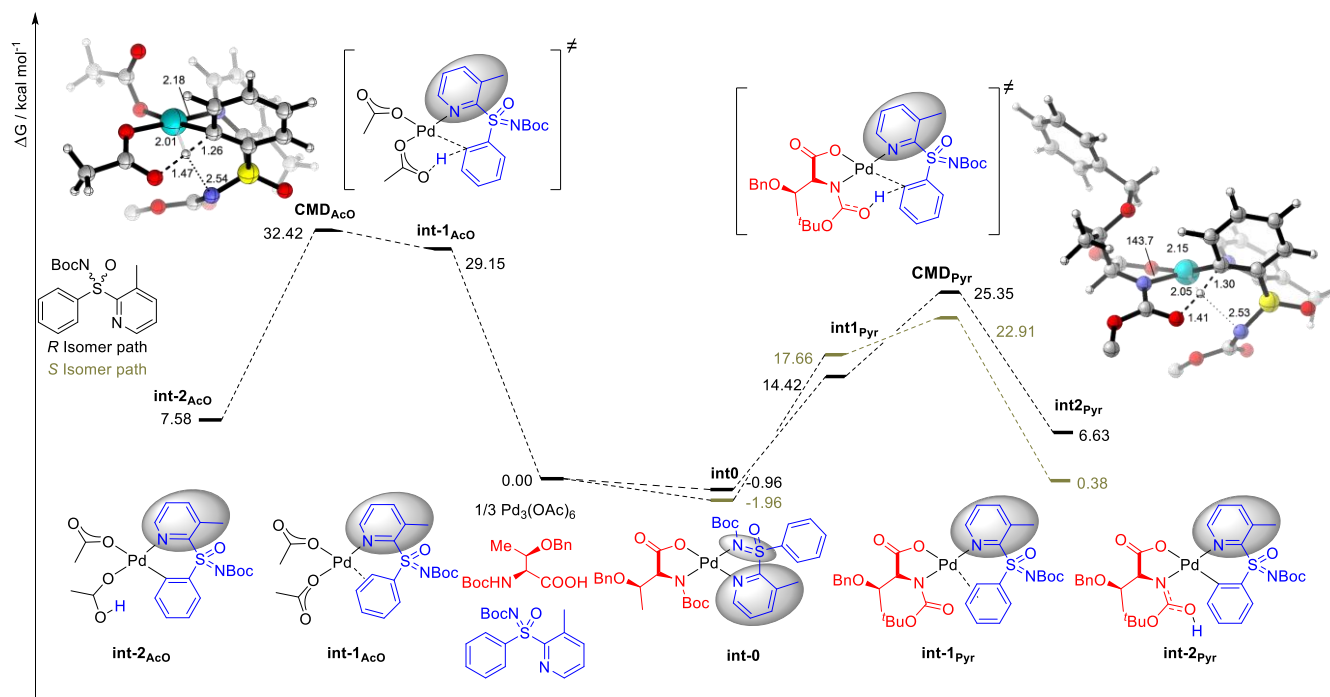

**Figure S8.** Comparison of the uncatalysed (left) versus MPAA catalysed (right) CMD step. Free energies at 343.15 K in DCE in kcal/mol

## Rationalization of the inverse selectivity of NBoc systems

The selectivity outcome of the system in which the NBoc is coordinated to the metal centre for the CMD reaction is inverse to the one observed experimentally. These results can be explained considering, once again, the Relay of chirality previously presented based on the work of Cheng *et al.*<sup>10</sup> Considering the plane defined by the coordination of the MPAA to the Pd, the orientation of the bulky side chain pushes the carbamate to the other side to avoid steric interactions. To this Pd-MPAA complex, the coordination of the phenyl group of the sulfoximine substrate should be able to point upwards (U) or downwards (D)

that plane, with any of both configurations (*R* or *S*) generating a total of 4 approaches. However, given the nature of the sulfoximine and the rigidity of the 5-membered palladacycle formed with NBoc compared to the 6-membered one formed with the pyridyl group, the system is not able to adapt the Upwards conformations. Regardless, based on our findings, those conformations are expected to be the higher in energy for each configuration. Hence, for this scenario there is only one approach for the *R* configuration and one for the *S* configuration ( $\text{CMD}_{\text{S=N-DR}}$  and  $\text{CMD}_{\text{S=N-DS}}$ ). As similarly observed for  $\text{CMD}_{\text{Pyr-DR}}$  and  $\text{CMD}_{\text{Pyr-DS}}$ , the C1-N2-Pd-O3 angle values for the S=N analogues are 138.45 and 139.22, respectively (Figure S9). The key difference between both approaches seems to rise from an electronic stabilization via a N $\cdots$ H hydrogen bond in a similar fashion as in the pyridine group CMD ( $\text{CMD}_{\text{Pyr-DS}}$ ). It is worth recall that the difference in selectivity is lower than that for the  $\text{CMD}_{\text{Pyr}}$  system (*R/S*: 2:98 vs 89:11)

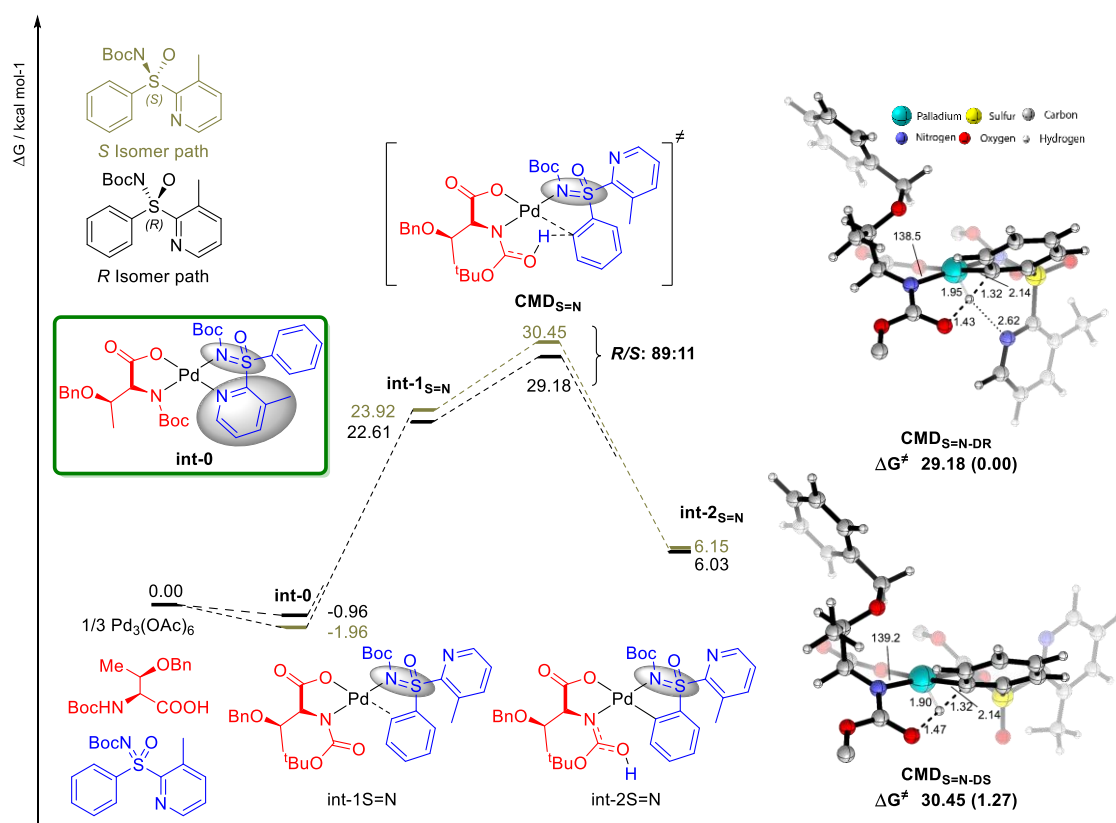

**Figure S9.** Energy profile for the CMD reaction step with NBoc group coordinated to Pd. Free energies at 343.15 K in DCE in kcal/mol, distances in Å. Relative energies between parentheses.

## Cartesian Coordinates

### Alanine

Imaginary frequencies = 0

E(MN15,DCE) = -476.2579078

E<sub>Thermal correction</sub> = 0.102573

|   |           |           |           |
|---|-----------|-----------|-----------|
| N | 0.619667  | 0.398987  | 0.169432  |
| H | 0.424600  | 1.335604  | 0.516050  |
| C | -0.518879 | -0.429272 | -0.142598 |
| H | -0.406020 | -0.824800 | -1.167938 |
| C | -0.670996 | -1.622188 | 0.804655  |
| C | -1.748799 | 0.449888  | -0.118568 |
| H | -0.804532 | -1.276500 | 1.840309  |
| H | -1.533268 | -2.237973 | 0.516422  |
| H | 0.242308  | -2.227641 | 0.740579  |
| O | -1.752394 | 1.616790  | 0.194737  |
| C | 1.879771  | -0.011381 | -0.150720 |
| O | 2.089922  | -1.098309 | -0.664721 |
| C | 2.991682  | 0.956777  | 0.185443  |
| H | 3.609185  | 1.103809  | -0.710409 |
| H | 2.629995  | 1.927479  | 0.549188  |
| H | 3.633997  | 0.499882  | 0.951223  |
| O | -2.853768 | -0.213922 | -0.465226 |
| H | -3.600674 | 0.407809  | -0.409043 |

### CH<sub>3</sub>COOH

Imaginary frequencies = 0

E(MN15,DCE) = -229.0394117

E<sub>Thermal correction</sub> = 0.030141

|   |           |           |           |
|---|-----------|-----------|-----------|
| C | -0.091087 | 0.121523  | 0.000011  |
| O | -0.637655 | 1.195512  | -0.000002 |
| O | -0.779719 | -1.033438 | 0.000002  |
| H | -1.724070 | -0.798117 | -0.000029 |
| C | 1.391686  | -0.112337 | 0.000004  |
| H | 1.672077  | -0.701520 | 0.884210  |
| H | 1.672145  | -0.700822 | -0.884649 |
| H | 1.915249  | 0.848752  | 0.000375  |

### Methyl-Acrylate

Imaginary frequencies = 0

E(MN15,DCE) = 306.36218632

E<sub>Thermal correction</sub> = 0.059947

|   |           |           |           |
|---|-----------|-----------|-----------|
| C | 0.039704  | 0.103470  | 0.000004  |
| C | 1.318082  | -0.654420 | -0.000018 |
| O | -0.061421 | 1.308138  | 0.000046  |
| O | -1.018880 | -0.718082 | -0.000029 |
| C | -2.284832 | -0.082743 | -0.000011 |
| C | 2.480276  | 0.002894  | 0.000009  |
| H | 1.247360  | -1.744364 | -0.000057 |
| H | -3.039388 | -0.876886 | -0.000031 |
| H | -2.400918 | 0.553763  | 0.889227  |
| H | -2.400920 | 0.553809  | -0.889217 |
| H | 3.439466  | -0.518765 | -0.000006 |
| H | 2.477428  | 1.096789  | 0.000048  |

### MPAA

Imaginary frequencies = 0

E(MN15,DCE) = -1053.984061

E<sub>Thermal correction</sub> = 0.31034

|   |           |           |           |
|---|-----------|-----------|-----------|
| C | -1.698106 | 2.685154  | -0.111160 |
| O | -2.099343 | 3.655969  | 0.478672  |
| C | 0.727354  | 2.168072  | -0.034938 |
| C | -0.662085 | 1.720713  | 0.447880  |
| N | -0.891738 | 0.370686  | 0.016378  |
| O | -2.030489 | 2.402631  | -1.375632 |
| C | 1.155106  | 3.477747  | 0.605920  |
| O | 1.608057  | 1.109905  | 0.267088  |
| C | 2.869827  | 1.181437  | -0.338185 |
| O | -2.111446 | -1.481721 | -0.160131 |
| C | -3.315871 | -2.285600 | -0.107046 |
| C | -2.842104 | -3.656208 | -0.570922 |
| C | -3.838204 | -2.356365 | 1.324104  |
| C | -4.360492 | -1.727306 | -1.067782 |
| C | -2.123841 | -0.186426 | 0.174903  |
| O | -3.089385 | 0.444029  | 0.565370  |
| C | 3.615681  | -0.115777 | -0.156643 |
| C | 3.250713  | -1.023450 | 0.842313  |

|   |           |           |           |
|---|-----------|-----------|-----------|
| C | 3.973652  | -2.206137 | 1.016084  |
| C | 5.067497  | -2.490375 | 0.197651  |
| C | 5.434949  | -1.586487 | -0.802459 |
| C | 4.710459  | -0.408332 | -0.979252 |
| H | 0.670911  | 2.277384  | -1.138620 |
| H | -0.717869 | 1.829500  | 1.545659  |
| H | 2.079766  | 3.863142  | 0.153988  |
| H | 0.372704  | 4.240526  | 0.493880  |
| H | 1.328117  | 3.316599  | 1.680497  |
| H | 2.764008  | 1.404943  | -1.419285 |
| H | 3.465247  | 2.008055  | 0.097046  |
| H | -3.682074 | -4.365696 | -0.573885 |
| H | -2.428201 | -3.592560 | -1.587621 |
| H | -2.059501 | -4.036790 | 0.101265  |
| H | -4.679307 | -3.063923 | 1.372456  |
| H | -4.179273 | -1.371126 | 1.664821  |
| H | -3.045662 | -2.716750 | 1.997294  |
| H | -4.701844 | -0.737777 | -0.739999 |
| H | -3.935804 | -1.645496 | -2.079688 |
| H | -5.222802 | -2.409308 | -1.108616 |
| H | 2.393660  | -0.794221 | 1.477896  |
| H | 3.678867  | -2.909803 | 1.798005  |
| H | 5.631172  | -3.415706 | 0.334971  |
| H | 6.285829  | -1.803893 | -1.452007 |
| H | 4.995132  | 0.293119  | -1.769426 |
| H | -0.079138 | -0.212993 | -0.164660 |
| H | -2.698136 | 3.057512  | -1.644345 |

### PdOAc<sub>2</sub>\_trimer

Imaginary frequencies = 0  
 E(MN15,DCE) = -1753.814649  
 E<sub>Thermal correction</sub> = 0.22939

|    |           |           |           |
|----|-----------|-----------|-----------|
| Pd | 1.573522  | 0.907091  | 0.000426  |
| O  | 2.245203  | 0.027904  | -1.651095 |
| O  | 2.595465  | -0.362384 | 1.153915  |
| C  | 2.187389  | -1.350109 | 1.822095  |
| O  | 1.092580  | -1.955737 | 1.652438  |
| Pd | -0.000951 | -1.814734 | -0.001731 |
| C  | 2.268254  | -1.223590 | -1.817393 |
| O  | 1.610659  | -2.068364 | -1.152505 |
| O  | 1.146620  | 1.927098  | 1.652860  |
| O  | 0.986842  | 2.427699  | -1.153074 |

|    |           |           |           |
|----|-----------|-----------|-----------|
| C  | -0.072139 | 2.570135  | -1.821360 |
| O  | -1.144448 | 1.924622  | -1.654011 |
| Pd | -1.573002 | 0.908284  | -0.000253 |
| C  | 0.074206  | 2.571992  | 1.820043  |
| O  | -0.984364 | 2.429399  | 1.150963  |
| O  | -2.239955 | 0.029097  | 1.653753  |
| O  | -2.598480 | -0.359792 | -1.152080 |
| C  | -2.264499 | -1.222458 | 1.819226  |
| C  | -2.192054 | -1.347310 | -1.821368 |
| O  | -1.612643 | -2.068001 | 1.149459  |
| O  | -1.095484 | -1.951178 | -1.656136 |
| C  | 3.195218  | -1.753706 | -2.877075 |
| C  | -0.073931 | 3.631858  | -2.887205 |
| C  | 0.071697  | 3.633608  | 2.886006  |
| C  | -3.185034 | -1.753375 | 2.884068  |
| C  | -3.111780 | -1.882006 | -2.885000 |
| C  | 3.104054  | -1.879776 | 2.890965  |
| H  | 0.276350  | 4.600488  | 2.402617  |
| H  | 0.859793  | 3.437463  | 3.621144  |
| H  | -0.914515 | 3.690633  | 3.360779  |
| H  | 0.927881  | 3.741055  | -3.317421 |
| H  | -0.356540 | 4.585262  | -2.416499 |
| H  | -0.816836 | 3.394341  | -3.656835 |
| H  | -3.716668 | -1.072384 | -3.308301 |
| H  | -2.534166 | -2.398309 | -3.659913 |
| H  | -3.786836 | -2.612106 | -2.414114 |
| H  | 3.347494  | -0.999579 | -3.657428 |
| H  | 2.803515  | -2.688159 | -3.293972 |
| H  | 4.167011  | -1.961625 | -2.405031 |
| H  | 3.821656  | -2.564325 | 2.414747  |
| H  | 3.665342  | -1.058079 | 3.350150  |
| H  | 2.532273  | -2.440989 | 3.638209  |
| H  | -3.369485 | -0.985467 | 3.643498  |
| H  | -2.767133 | -2.663915 | 3.328082  |
| H  | -4.143585 | -2.008281 | 2.408054  |

### Sulfoximine

Imaginary frequencies = 0  
 E(MN15,DCE) = -1392.68078  
 E<sub>Thermal correction</sub> = 0.28523

|   |           |           |          |
|---|-----------|-----------|----------|
| C | -2.483961 | -0.503637 | 0.229950 |
| S | -0.775257 | -0.492155 | 0.690386 |



C -0.149922 1.030096 -0.088748  
 O -0.689085 -0.355609 2.146073  
 C -3.394436 -0.025599 1.171276  
 C -4.748980 -0.006729 0.835926  
 C -5.162044 -0.460051 -0.419026  
 C -4.230783 -0.940346 -1.345543  
 C -2.874144 -0.968619 -1.026124  
 N -0.376672 1.030780 -1.391052  
 C 0.066093 2.050040 -2.122533  
 C 0.767865 3.110597 -1.546371  
 C 0.996179 3.086686 -0.172690  
 C 0.535489 2.026423 0.624070  
 N -0.200199 -1.708844 -0.078491  
 O 1.895742 -0.911741 0.353124  
 C 3.299258 -0.725741 0.039340  
 C 3.753745 0.380665 0.982452  
 C 4.092486 -1.998259 0.321953  
 C 3.428638 -0.263966 -1.408732  
 C 1.148701 -1.821411 -0.333384  
 O 1.618639 -2.634774 -1.091870  
 C 0.817618 2.001464 2.098579  
 H -3.034872 0.302960 2.148249  
 H -5.483190 0.355057 1.558407  
 H -6.223376 -0.445963 -0.676820  
 H -4.565300 -1.301579 -2.320008  
 H -2.115826 -1.348742 -1.711743  
 H -0.138983 2.019738 -3.196616  
 H 1.130266 3.935609 -2.161841  
 H 1.550457 3.898782 0.306340  
 H 4.830338 0.561355 0.849864  
 H 3.216913 1.317208 0.771173  
 H 3.572380 0.092732 2.028551  
 H 5.166679 -1.788157 0.207212  
 H 3.805375 -2.804057 -0.362266  
 H 3.914201 -2.326388 1.357092  
 H 2.796632 0.626213 -1.568038  
 H 4.472816 0.008318 -1.623437  
 H 3.116118 -1.055444 -2.101381  
 H 1.474399 2.841178 2.365718  
 H -0.108521 2.065553 2.685763  
 H 1.292516 1.053870 2.383407

**Int-0-R**

Imaginary frequencies = 0  
 E(MN15,DCE) = -2573.192436  
 E<sub>Thermal correction</sub> = 0.6076

Pd -0.360041 0.145477 -0.495033  
 O 0.080973 -1.684315 -0.997762  
 C 1.256877 -2.124836 -0.598281  
 N 1.606993 0.266736 -0.313743  
 N -0.886088 1.941569 0.354229  
 C 2.330469 1.052556 -1.156003  
 O 1.584498 -3.290386 -0.689017  
 C 0.021999 2.839994 0.753697  
 C -0.366061 4.006942 1.409722  
 C -1.713649 4.224513 1.668943  
 C -2.681515 3.277892 1.294636  
 C -2.180113 2.151156 0.632696  
 C -3.617150 -0.020658 1.686255  
 O 1.568088 2.072384 -1.638631  
 O 3.510071 0.913956 -1.438559  
 C -4.938887 -0.195898 2.090168  
 C -5.173871 -0.902054 3.269985  
 C -4.102425 -1.417733 4.004997  
 C -2.530448 -0.535169 2.394377  
 C -2.785444 -1.238517 3.570461  
 H -2.038154 5.130760 2.186122  
 H 0.392422 4.727074 1.719215  
 H 1.060760 2.589655 0.539836  
 H -6.198654 -1.060950 3.610616  
 H -4.296334 -1.974367 4.924151  
 H -1.509120 -0.405363 2.024560  
 H -1.951507 -1.654818 4.139032  
 H -5.748762 0.200501 1.474506  
 C -3.046345 -1.198297 -1.261995  
 C 2.133348 3.130100 -2.438933  
 C 3.198295 3.877456 -1.641034  
 C 2.684863 2.578922 -3.749997  
 C 0.939412 4.038231 -2.710159  
 H 2.771267 4.241513 -0.691471  
 H 4.049272 3.220573 -1.422508  
 H 3.551020 4.749531 -2.211761  
 H 1.905444 2.000604 -4.268350  
 H 2.990949 3.411625 -4.401323  
 H 3.546819 1.927814 -3.563465  
 H 1.242195 4.895108 -3.329420  
 H 0.150458 3.480292 -3.235259

|   |           |           |           |
|---|-----------|-----------|-----------|
| H | 0.525142  | 4.419686  | -1.763185 |
| C | -4.133391 | 3.500208  | 1.612413  |
| H | -4.717505 | 3.660675  | 0.696457  |
| H | -4.577166 | 2.631273  | 2.120413  |
| H | -4.238777 | 4.375516  | 2.265981  |
| N | -2.408712 | -0.014794 | -0.816351 |
| O | -4.571238 | 1.392686  | -0.334063 |
| O | -4.077489 | -1.600375 | -0.758206 |
| S | -3.320457 | 0.839515  | 0.163001  |
| C | -2.505757 | -3.126967 | -2.635681 |
| C | -2.298292 | -4.010649 | -1.412018 |
| C | -3.865406 | -3.336727 | -3.289036 |
| C | -1.365641 | -3.323766 | -3.621817 |
| H | -1.312422 | -3.799076 | -0.971633 |
| H | -3.089661 | -3.854455 | -0.666231 |
| H | -2.323433 | -5.063878 | -1.728263 |
| H | -3.990453 | -2.648834 | -4.138709 |
| H | -3.931932 | -4.367722 | -3.666796 |
| H | -4.675794 | -3.168411 | -2.567749 |
| H | -1.378381 | -4.355864 | -4.001174 |
| H | -1.468273 | -2.631975 | -4.470635 |
| H | -0.409839 | -3.135803 | -3.112440 |
| O | -2.373619 | -1.721743 | -2.250897 |
| C | 2.173176  | -1.042679 | -0.027024 |
| C | 2.432208  | -1.214000 | 1.484662  |
| H | 3.140823  | -1.125666 | -0.544245 |
| C | 1.171121  | -1.076708 | 2.317818  |
| O | 2.988825  | -2.459379 | 1.814104  |
| H | 3.134616  | -0.396517 | 1.750673  |
| H | 0.756198  | -0.061496 | 2.223489  |
| H | 1.410379  | -1.272891 | 3.372740  |
| H | 0.418615  | -1.813032 | 1.987993  |
| C | 4.161995  | -2.829531 | 1.125650  |
| C | 5.273429  | -1.817740 | 1.295001  |
| H | 4.462844  | -3.793000 | 1.564361  |
| H | 3.949367  | -3.012584 | 0.058295  |
| C | 5.811681  | -1.127140 | 0.205418  |
| C | 5.740092  | -1.520335 | 2.584137  |
| C | 6.812215  | -0.169321 | 0.394353  |
| H | 5.435035  | -1.326458 | -0.801713 |
| C | 6.736651  | -0.565711 | 2.776922  |
| H | 5.304233  | -2.047392 | 3.437999  |
| C | 7.277841  | 0.111147  | 1.678486  |
| H | 7.218014  | 0.365462  | -0.467122 |
| H | 7.096582  | -0.346938 | 3.785313  |

|   |          |          |          |
|---|----------|----------|----------|
| H | 8.059063 | 0.860377 | 1.827586 |
|---|----------|----------|----------|

### Int-0-S

Imaginary frequencies = 0

E(MN15,DCE) = -2573.194026

E<sub>Thermal correction</sub> = 0.60408

|    |           |           |           |
|----|-----------|-----------|-----------|
| Pd | 0.028645  | 0.238672  | 0.109849  |
| O  | -1.248960 | -0.768053 | 1.180059  |
| C  | -2.397594 | -0.181350 | 1.446881  |
| N  | -1.131944 | 1.735185  | 0.660838  |
| N  | 1.213642  | 1.257386  | -1.219433 |
| C  | -0.613155 | 2.750385  | 1.400258  |
| O  | -3.319038 | -0.771246 | 1.972654  |
| C  | 0.914360  | 2.515804  | -1.566188 |
| C  | 1.715885  | 3.222608  | -2.459339 |
| C  | 2.837359  | 2.603804  | -3.000926 |
| C  | 3.144471  | 1.270625  | -2.687576 |
| C  | 2.271279  | 0.658682  | -1.778794 |
| C  | 4.040862  | -1.303646 | -0.758887 |
| O  | 0.747481  | 2.784560  | 1.276209  |
| O  | -1.236377 | 3.558118  | 2.067249  |
| C  | 4.870418  | -2.282697 | -1.296863 |
| C  | 6.143772  | -2.432932 | -0.747707 |
| C  | 6.551434  | -1.613828 | 0.309143  |
| C  | 4.412129  | -0.485903 | 0.309592  |
| C  | 5.692288  | -0.644780 | 0.838720  |
| H  | 3.480788  | 3.141192  | -3.701830 |
| H  | 1.453014  | 4.247556  | -2.724478 |
| H  | 0.011143  | 2.926579  | -1.110958 |
| H  | 6.817966  | -3.195562 | -1.141536 |
| H  | 7.550726  | -1.735902 | 0.732068  |
| H  | 3.713509  | 0.254182  | 0.713679  |
| H  | 6.017120  | -0.017592 | 1.670749  |
| H  | 4.506563  | -2.905411 | -2.116803 |
| C  | 1.476746  | -2.544904 | 0.355072  |
| C  | 1.538201  | 3.855025  | 1.819062  |
| C  | 1.149187  | 5.176717  | 1.162543  |
| C  | 1.408058  | 3.917665  | 3.337997  |
| C  | 2.960426  | 3.460250  | 1.430722  |
| H  | 1.255520  | 5.100692  | 0.067589  |
| H  | 0.109500  | 5.429418  | 1.406982  |
| H  | 1.808280  | 5.983986  | 1.515394  |

|   |           |           |           |
|---|-----------|-----------|-----------|
| H | 1.629992  | 2.931145  | 3.772191  |
| H | 2.127456  | 4.646365  | 3.741917  |
| H | 0.391469  | 4.209454  | 3.625964  |
| H | 3.680004  | 4.222567  | 1.763456  |
| H | 3.220871  | 2.499950  | 1.902525  |
| H | 3.044343  | 3.349393  | 0.336599  |
| C | 4.336091  | 0.590100  | -3.300850 |
| H | 5.155905  | 0.501958  | -2.570108 |
| H | 4.086768  | -0.421856 | -3.646614 |
| H | 4.702826  | 1.174956  | -4.154111 |
| N | 1.371593  | -1.293845 | -0.288614 |
| O | 2.334496  | -1.825843 | -2.718565 |
| O | 2.096511  | -3.467938 | -0.137974 |
| S | 2.427566  | -1.104334 | -1.456753 |
| C | 0.288035  | -3.699010 | 2.134143  |
| C | -0.659487 | -4.332325 | 1.124444  |
| C | 1.397328  | -4.642760 | 2.580044  |
| C | -0.487082 | -3.147517 | 3.320391  |
| H | -1.388551 | -3.574389 | 0.799924  |
| H | -0.112273 | -4.722879 | 0.254233  |
| H | -1.200276 | -5.164594 | 1.597506  |
| H | 2.086370  | -4.122308 | 3.262314  |
| H | 0.952890  | -5.490205 | 3.122723  |
| H | 1.963044  | -5.023510 | 1.720358  |
| H | -0.936851 | -3.980657 | 3.880376  |
| H | 0.187680  | -2.596715 | 3.992093  |
| H | -1.279919 | -2.470099 | 2.972607  |
| O | 0.868295  | -2.508984 | 1.512913  |
| C | -2.471546 | 1.287964  | 1.008349  |
| C | -3.454037 | 1.463664  | -0.159501 |
| H | -2.871332 | 1.888303  | 1.839516  |
| C | -3.181082 | 0.493021  | -1.301299 |
| O | -4.738492 | 1.350450  | 0.402593  |
| H | -3.308021 | 2.500983  | -0.530580 |
| H | -2.154325 | 0.647297  | -1.671051 |
| H | -3.873026 | 0.644794  | -2.143016 |
| H | -3.279815 | -0.549883 | -0.962168 |
| C | -5.829764 | 1.425727  | -0.464376 |
| C | -6.320627 | 0.070687  | -0.931278 |
| H | -6.643437 | 1.924858  | 0.089892  |
| H | -5.608048 | 2.071250  | -1.338847 |
| C | -7.138755 | -0.038731 | -2.061524 |
| C | -5.989169 | -1.080718 | -0.207024 |
| C | -7.628709 | -1.281860 | -2.464882 |
| H | -7.392558 | 0.859527  | -2.633958 |

|   |           |           |           |
|---|-----------|-----------|-----------|
| C | -6.476824 | -2.324196 | -0.615925 |
| H | -5.331170 | -0.989180 | 0.662479  |
| C | -7.298104 | -2.429767 | -1.740738 |
| H | -8.265086 | -1.355872 | -3.350186 |
| H | -6.209796 | -3.218903 | -0.048372 |
| H | -7.676718 | -3.404901 | -2.056265 |

### CMD\_NBoc\_R

Imaginary frequencies = 1 (-1190.6103)

E(MN15,DCE) = -2573.144397

E<sub>Thermal correction</sub> = 0.59945

|    |           |           |           |
|----|-----------|-----------|-----------|
| Pd | -0.263986 | 0.081872  | 0.077839  |
| C  | 1.859826  | -0.345225 | -1.692661 |
| O  | 2.731880  | -0.914813 | -2.322153 |
| C  | 3.194808  | 1.072331  | -0.112700 |
| C  | 2.076105  | 1.085463  | -1.171629 |
| N  | 0.827407  | 1.538094  | -0.607800 |
| N  | -3.298703 | 0.778941  | -0.585542 |
| C  | -3.853517 | -0.321615 | -0.110560 |
| C  | -5.017991 | -0.937426 | -0.589826 |
| C  | -5.591483 | -0.266937 | -1.684303 |
| C  | -3.858721 | 1.394938  | -1.619880 |
| C  | -5.024010 | 0.892266  | -2.206218 |
| S  | -2.871259 | -0.991460 | 1.248160  |
| O  | -3.670112 | -1.889430 | 2.072323  |
| O  | 0.724297  | -0.895784 | -1.349127 |
| C  | 3.544514  | 2.472065  | 0.354053  |
| O  | 2.792095  | 0.348524  | 1.031924  |
| C  | 3.032550  | -1.047251 | 1.058085  |
| O  | 0.955483  | 3.646191  | -1.387878 |
| C  | 0.623410  | 5.056914  | -1.334727 |
| C  | 1.791518  | 5.710880  | -2.059602 |
| C  | -0.685156 | 5.322365  | -2.069709 |
| C  | 0.573042  | 5.515886  | 0.119060  |
| C  | 0.251484  | 2.715696  | -0.746298 |
| O  | -0.905188 | 2.933709  | -0.282886 |
| N  | -1.463386 | -1.515243 | 0.682023  |
| O  | -0.339417 | -3.202749 | -0.221993 |
| C  | -0.017775 | -4.201649 | -1.234197 |
| C  | -0.542955 | -3.760705 | -2.595297 |
| C  | 1.504383  | -4.210504 | -1.241485 |
| C  | -0.595802 | -5.540011 | -0.793812 |

|   |           |           |           |
|---|-----------|-----------|-----------|
| C | -1.538623 | -2.691009 | -0.082661 |
| O | -2.587386 | -3.137003 | -0.513130 |
| C | 4.492807  | -1.390615 | 0.884813  |
| C | 4.917973  | -2.221975 | -0.155948 |
| C | 6.274065  | -2.526435 | -0.306100 |
| C | 7.214186  | -1.989904 | 0.573925  |
| C | 6.797338  | -1.142406 | 1.605868  |
| C | 5.444212  | -0.844895 | 1.758597  |
| C | -5.626027 | -2.192392 | -0.039758 |
| C | -2.740597 | 0.469845  | 3.494762  |
| C | -2.124858 | 1.387015  | 4.352503  |
| C | -1.045387 | 2.147892  | 3.900152  |
| C | -0.590719 | 2.024811  | 2.583477  |
| C | -1.201382 | 1.141032  | 1.682241  |
| C | -2.269859 | 0.382665  | 2.190605  |
| H | 4.071143  | 0.591129  | -0.586052 |
| H | 2.396969  | 1.718979  | -2.013735 |
| H | -6.500656 | -0.680490 | -2.128671 |
| H | -3.362475 | 2.300828  | -1.979682 |
| H | -5.477244 | 1.400530  | -3.058813 |
| H | 3.824031  | 3.117580  | -0.491526 |
| H | 4.375203  | 2.430300  | 1.072501  |
| H | 2.670464  | 2.914534  | 0.859789  |
| H | 2.683048  | -1.373706 | 2.049667  |
| H | 2.423609  | -1.590208 | 0.313936  |
| H | 1.659284  | 6.801934  | -2.087098 |
| H | 2.734677  | 5.479896  | -1.542543 |
| H | 1.858028  | 5.335326  | -3.090742 |
| H | -0.855917 | 6.407395  | -2.134177 |
| H | -1.528350 | 4.857403  | -1.544137 |
| H | -0.629713 | 4.919988  | -3.092206 |
| H | 1.510185  | 5.242378  | 0.629363  |
| H | 0.466199  | 6.609887  | 0.158617  |
| H | -0.274106 | 5.058549  | 0.646793  |
| H | -0.130397 | -4.427574 | -3.366713 |
| H | -1.638692 | -3.803216 | -2.640239 |
| H | -0.199765 | -2.734986 | -2.794213 |
| H | 1.869024  | -4.999760 | -1.915431 |
| H | 1.890020  | -4.404753 | -0.229029 |
| H | 1.877752  | -3.235972 | -1.593363 |
| H | -0.199467 | -5.822473 | 0.192860  |
| H | -1.691690 | -5.485437 | -0.740163 |
| H | -0.314216 | -6.319325 | -1.517369 |
| H | 4.178779  | -2.607427 | -0.862929 |
| H | 6.596663  | -3.176100 | -1.122873 |

|   |           |           |           |
|---|-----------|-----------|-----------|
| H | 8.274356  | -2.225198 | 0.454089  |
| H | 7.531958  | -0.716643 | 2.293675  |
| H | 5.108569  | -0.179732 | 2.559876  |
| H | -6.484621 | -2.491758 | -0.655282 |
| H | -4.879179 | -2.997563 | -0.030398 |
| H | -5.957353 | -2.051276 | 0.998008  |
| H | -3.543377 | -0.189772 | 3.831378  |
| H | -2.475887 | 1.486473  | 5.381396  |
| H | -0.550756 | 2.844373  | 4.580448  |
| H | 0.242414  | 2.637533  | 2.225151  |
| H | -1.139598 | 1.767214  | 0.516638  |

### CMD\_NBoc\_S

Imaginary frequencies = 1 (-1116.6246)

E(MN15,DCE) = -2573.142368

E<sub>Thermal correction</sub> = 0.59905

|    |           |           |           |
|----|-----------|-----------|-----------|
| Pd | -0.069168 | -0.532055 | -0.444771 |
| C  | -2.049515 | 1.050396  | -1.624985 |
| O  | -2.626137 | 2.034372  | -2.050125 |
| C  | -3.430553 | 0.486554  | 0.388905  |
| C  | -2.829242 | -0.069652 | -0.915829 |
| N  | -1.904394 | -1.142353 | -0.647026 |
| N  | 4.099345  | 0.208712  | 1.774598  |
| C  | 4.374545  | -0.403621 | 0.636573  |
| C  | 5.626439  | -0.468149 | 0.006382  |
| C  | 6.649833  | 0.170446  | 0.726963  |
| C  | 5.086023  | 0.812442  | 2.429085  |
| C  | 6.393732  | 0.808723  | 1.936200  |
| S  | 2.896241  | -1.116634 | -0.119548 |
| O  | 3.232331  | -2.015332 | -1.215061 |
| O  | -0.751651 | 0.888844  | -1.660620 |
| C  | -4.322767 | -0.527291 | 1.078127  |
| O  | -2.406961 | 0.819434  | 1.305669  |
| C  | -1.856789 | 2.122763  | 1.245935  |
| O  | -3.333207 | -2.822444 | -1.094315 |
| C  | -3.778077 | -4.199682 | -0.993882 |
| C  | -5.267236 | -4.100370 | -1.293882 |
| C  | -3.071756 | -5.061132 | -2.033388 |
| C  | -3.553155 | -4.706203 | 0.427519  |
| C  | -2.096459 | -2.442177 | -0.781952 |
| O  | -1.150982 | -3.258692 | -0.607226 |
| N  | 1.891139  | 0.104838  | -0.370030 |

|   |           |           |           |
|---|-----------|-----------|-----------|
| O | 1.590046  | 2.229850  | -0.930042 |
| C | 1.627143  | 3.365186  | -1.843581 |
| C | 1.621250  | 2.851156  | -3.277718 |
| C | 0.330624  | 4.102635  | -1.542162 |
| C | 2.847837  | 4.221268  | -1.531591 |
| C | 2.423597  | 1.218710  | -1.023673 |
| O | 3.523869  | 1.217784  | -1.549614 |
| C | -2.893908 | 3.204711  | 1.432903  |
| C | -3.099082 | 4.181255  | 0.453256  |
| C | -4.065888 | 5.173889  | 0.638457  |
| C | -4.843572 | 5.187143  | 1.796525  |
| C | -4.657211 | 4.201217  | 2.771219  |
| C | -3.688161 | 3.215974  | 2.588592  |
| C | 5.899644  | -1.074974 | -1.336686 |
| C | 2.624304  | -2.397999 | 2.318268  |
| C | 1.838058  | -2.911777 | 3.351994  |
| C | 0.446930  | -2.915871 | 3.236593  |
| C | -0.163135 | -2.458859 | 2.067351  |
| C | 0.592812  | -1.966827 | 0.991628  |
| C | 1.988291  | -1.918679 | 1.177736  |
| H | -4.009196 | 1.387390  | 0.111316  |
| H | -3.651242 | -0.393826 | -1.573758 |
| H | 7.658684  | 0.173068  | 0.306361  |
| H | 4.829453  | 1.313796  | 3.366434  |
| H | 7.192929  | 1.308688  | 2.485812  |
| H | -5.122421 | -0.876938 | 0.408924  |
| H | -4.767801 | -0.082197 | 1.979192  |
| H | -3.716803 | -1.396301 | 1.383120  |
| H | -1.124695 | 2.156476  | 2.067666  |
| H | -1.292329 | 2.295015  | 0.312810  |
| H | -5.730520 | -5.096460 | -1.250776 |
| H | -5.759694 | -3.446927 | -0.558326 |
| H | -5.425664 | -3.678801 | -2.296800 |
| H | -3.500576 | -6.074388 | -2.021913 |
| H | -1.996933 | -5.122997 | -1.824051 |
| H | -3.217844 | -4.635113 | -3.037036 |
| H | -4.010000 | -4.009328 | 1.148464  |
| H | -4.030452 | -5.689634 | 0.549810  |
| H | -2.481613 | -4.802784 | 0.645221  |
| H | 1.482367  | 3.697535  | -3.966087 |
| H | 2.563693  | 2.345517  | -3.527387 |
| H | 0.780422  | 2.152266  | -3.399182 |
| H | 0.278960  | 5.023136  | -2.142316 |
| H | 0.285673  | 4.375678  | -0.476442 |
| H | -0.530397 | 3.462045  | -1.788851 |

|   |           |           |           |
|---|-----------|-----------|-----------|
| H | 2.825628  | 4.547215  | -0.480764 |
| H | 3.772665  | 3.659179  | -1.715884 |
| H | 2.839755  | 5.116501  | -2.170922 |
| H | -2.513729 | 4.138954  | -0.468738 |
| H | -4.219636 | 5.931551  | -0.133284 |
| H | -5.601751 | 5.960781  | 1.939216  |
| H | -5.269186 | 4.205239  | 3.676493  |
| H | -3.538114 | 2.437778  | 3.342957  |
| H | 6.951744  | -0.916603 | -1.607683 |
| H | 5.674901  | -2.149032 | -1.355974 |
| H | 5.251394  | -0.600535 | -2.087190 |
| H | 3.709375  | -2.348234 | 2.420694  |
| H | 2.317315  | -3.291498 | 4.256277  |
| H | -0.166699 | -3.291485 | 4.057817  |
| H | -1.250227 | -2.505234 | 1.954650  |
| H | -0.094013 | -2.394978 | -0.055020 |

### CMD\_Pyr\_R\_cis

Imaginary frequencies = 1 (-1167.3321)

E(MN15,DCE) = -2573.136478

E<sub>Thermal correction</sub> = 0.60122

|    |           |           |           |
|----|-----------|-----------|-----------|
| Pd | -0.491360 | -1.081434 | -0.923593 |
| C  | 2.237993  | -1.664920 | -1.263980 |
| O  | 3.225141  | -2.312458 | -1.549462 |
| C  | 2.921126  | 0.452078  | -0.039900 |
| C  | 2.217321  | -0.135528 | -1.313696 |
| N  | 0.823623  | 0.285014  | -1.389944 |
| N  | -1.596462 | -2.665424 | -0.137577 |
| C  | -2.581748 | -2.483497 | 0.753218  |
| C  | -3.041758 | -3.476379 | 1.627086  |
| C  | -2.455193 | -4.741393 | 1.454499  |
| C  | -1.056351 | -3.883028 | -0.288332 |
| C  | -1.487290 | -4.958709 | 0.483483  |
| S  | -3.368749 | -0.861688 | 0.745432  |
| O  | -4.738113 | -1.027776 | 1.228752  |
| O  | 1.131106  | -2.203382 | -0.800939 |
| C  | 2.937356  | -0.505301 | 1.144809  |
| O  | 4.172622  | 1.018963  | -0.353228 |
| C  | 5.178381  | 0.148611  | -0.827116 |
| O  | 1.462593  | 2.406833  | -1.686856 |
| C  | 1.490696  | 3.799437  | -1.269947 |
| C  | 2.869480  | 4.256743  | -1.723390 |











|   |           |           |           |   |           |           |           |
|---|-----------|-----------|-----------|---|-----------|-----------|-----------|
| C | 2.158640  | -0.092140 | -1.899685 | H | 4.407854  | -0.528610 | -0.584977 |
| O | 2.952092  | -0.431060 | -2.753989 | H | 3.178428  | 1.574784  | -0.998380 |
| C | 3.633990  | -0.204509 | 0.135642  | H | -7.252901 | -2.997874 | -0.283311 |
| C | 2.647103  | 0.672278  | -0.654552 | H | -3.662409 | -5.163376 | 0.756907  |
| N | 1.495822  | 1.018655  | 0.145646  | H | -6.127799 | -5.172439 | 0.211320  |
| N | -3.496125 | -3.112539 | 0.533602  | H | 4.772194  | 1.461703  | 0.942511  |
| C | -4.107983 | -1.970348 | 0.255274  | H | 4.997332  | -0.100323 | 1.797617  |
| C | -5.470837 | -1.812657 | -0.047413 | H | 3.490553  | 0.830251  | 2.017096  |
| C | -6.184943 | -3.026707 | -0.052291 | H | 2.375901  | -3.230504 | 0.519518  |
| C | -4.196940 | -4.238320 | 0.523315  | H | 2.294323  | -2.343872 | -1.012393 |
| C | -5.563667 | -4.238387 | 0.223506  | H | 3.766333  | 5.792930  | 1.796166  |
| S | -2.916595 | -0.619127 | 0.233778  | H | 4.416089  | 4.144878  | 1.548051  |
| O | -1.838567 | -1.092741 | -0.706240 | H | 3.754320  | 5.060446  | 0.165284  |
| O | 0.877349  | -0.373130 | -1.920763 | H | 1.249495  | 6.176006  | 1.581079  |
| C | 4.269136  | 0.547319  | 1.289391  | H | 0.167052  | 4.796355  | 1.225228  |
| O | 2.972008  | -1.323507 | 0.687396  | H | 1.276282  | 5.420944  | -0.034424 |
| C | 2.904075  | -2.494096 | -0.105322 | H | 2.875503  | 3.155563  | 3.258827  |
| O | 2.249378  | 3.061418  | 0.707983  | H | 2.276051  | 4.799138  | 3.605607  |
| C | 2.255887  | 4.270537  | 1.512879  | H | 1.116844  | 3.500972  | 3.199353  |
| C | 3.634598  | 4.854688  | 1.238599  | H | -2.079501 | 4.436968  | -3.593814 |
| C | 1.162044  | 5.221027  | 1.041756  | H | -3.563696 | 3.591198  | -3.066114 |
| C | 2.114854  | 3.904457  | 2.986486  | H | -2.585078 | 4.516556  | -1.886872 |
| C | 1.259172  | 2.177093  | 0.740145  | H | 0.165218  | 3.637350  | -2.941085 |
| O | 0.152019  | 2.412037  | 1.299872  | H | 0.350068  | 2.168520  | -1.943133 |
| N | -3.578191 | 0.721066  | -0.027912 | H | -0.281743 | 3.674705  | -1.205461 |
| O | -2.171119 | 1.955494  | -1.286936 | H | -1.073582 | 0.759085  | -3.348824 |
| C | -1.690342 | 2.637947  | -2.485181 | H | -2.689787 | 1.327926  | -3.902389 |
| C | -2.543916 | 3.867704  | -2.775016 | H | -1.203942 | 2.102952  | -4.516388 |
| C | -0.273642 | 3.057086  | -2.116570 | H | 3.950455  | -2.808915 | -2.603839 |
| C | -1.671135 | 1.639332  | -3.635037 | H | 6.211457  | -3.684642 | -3.209886 |
| C | -3.399945 | 1.451760  | -1.211684 | H | 7.818549  | -4.324154 | -1.417396 |
| O | -4.282733 | 1.620225  | -2.020759 | H | 7.161983  | -4.099948 | 0.976055  |
| C | 4.268607  | -3.018811 | -0.484968 | H | 4.888661  | -3.254618 | 1.567403  |
| C | 4.649433  | -3.128601 | -1.826236 | H | -7.255922 | -0.740951 | -0.511764 |
| C | 5.921517  | -3.602957 | -2.159832 | H | -6.099076 | 0.181933  | 0.493610  |
| C | 6.823620  | -3.956164 | -1.155759 | H | -5.783032 | -0.004449 | -1.216523 |
| C | 6.455225  | -3.829593 | 0.187729  | H | -3.623573 | -1.748329 | 2.916047  |
| C | 5.184681  | -3.361921 | 0.519531  | H | -2.236466 | -1.806976 | 4.991669  |
| C | -6.192299 | -0.527106 | -0.340218 | H | 0.043652  | -0.810360 | 4.989574  |
| C | -2.642444 | -1.270770 | 2.941786  | H | 0.906356  | 0.346187  | 2.955261  |
| C | -1.855098 | -1.313725 | 4.095515  | H | -0.510522 | 1.159600  | 1.253583  |
| C | -0.577241 | -0.750075 | 4.093453  |   |           |           |           |
| C | -0.089078 | -0.107960 | 2.953455  |   |           |           |           |
| C | -0.863159 | -0.010703 | 1.786566  |   |           |           |           |
| C | -2.128123 | -0.627002 | 1.823074  |   |           |           |           |

**CMD\_SO-S**

Imaginary frequencies = 1 (-1165.5633)

E(MN15,DCE) = -2573.134812

E<sub>Thermal correction</sub> = 0.59443

|    |           |           |           |
|----|-----------|-----------|-----------|
| Pd | 0.327921  | -0.267917 | -0.122055 |
| C  | 2.401667  | -0.753665 | -1.930718 |
| O  | 3.140009  | -1.312994 | -2.714474 |
| C  | 4.002635  | -0.206357 | -0.078276 |
| C  | 2.941334  | 0.371276  | -1.029468 |
| N  | 1.832130  | 0.932212  | -0.293331 |
| N  | -2.824905 | 2.052500  | 0.379442  |
| C  | -2.540948 | 1.042201  | -0.421908 |
| C  | -2.250482 | 1.112518  | -1.794142 |
| C  | -2.226552 | 2.428871  | -2.285326 |
| C  | -2.805278 | 3.284602  | -0.119640 |
| C  | -2.491081 | 3.518090  | -1.460173 |
| S  | -2.483915 | -0.506799 | 0.524135  |
| O  | -1.482155 | -1.401489 | -0.170119 |
| O  | 1.144306  | -1.076851 | -1.734029 |
| C  | 4.659166  | 0.870316  | 0.764082  |
| O  | 3.412978  | -1.131880 | 0.811417  |
| C  | 3.394088  | -2.493495 | 0.418712  |
| O  | 2.518093  | 3.065513  | -0.479005 |
| C  | 2.484210  | 4.483687  | -0.165221 |
| C  | 3.790837  | 4.993575  | -0.756770 |
| C  | 1.290208  | 5.145075  | -0.844358 |
| C  | 2.472480  | 4.671410  | 1.347587  |
| C  | 1.579352  | 2.213747  | -0.086033 |
| O  | 0.503593  | 2.591126  | 0.462853  |
| N  | -3.844828 | -1.092101 | 0.952326  |
| O  | -5.914797 | -1.744627 | 0.487585  |
| C  | -7.089478 | -2.012137 | -0.322598 |
| C  | -6.763444 | -3.046383 | -1.394400 |
| C  | -8.079574 | -2.580456 | 0.684704  |
| C  | -7.620624 | -0.714057 | -0.920990 |
| C  | -4.806242 | -1.240763 | -0.034870 |
| O  | -4.655523 | -0.936812 | -1.207267 |
| C  | 4.774051  | -3.037590 | 0.136686  |
| C  | 5.110487  | -3.512939 | -1.135043 |
| C  | 6.397015  | -3.998187 | -1.387295 |
| C  | 7.357020  | -3.997871 | -0.374753 |
| C  | 7.031899  | -3.505837 | 0.893648  |
| C  | 5.747158  | -3.027326 | 1.146031  |
| C  | -1.989394 | -0.051536 | -2.702409 |
| C  | -2.178158 | -0.337814 | 3.260248  |

|   |           |           |           |
|---|-----------|-----------|-----------|
| C | -1.341814 | -0.135473 | 4.363955  |
| C | -0.033130 | 0.322317  | 4.186887  |
| C | 0.455736  | 0.605780  | 2.907823  |
| C | -0.359656 | 0.436579  | 1.780272  |
| C | -1.660233 | -0.040051 | 2.009806  |
| H | 4.754129  | -0.707323 | -0.716017 |
| H | 3.417647  | 1.128853  | -1.671880 |
| H | -2.000005 | 2.582608  | -3.343684 |
| H | -3.037779 | 4.104958  | 0.564955  |
| H | -2.462013 | 4.536462  | -1.851594 |
| H | 5.103511  | 1.655120  | 0.134489  |
| H | 5.439829  | 0.423331  | 1.395564  |
| H | 3.905289  | 1.334026  | 1.421615  |
| H | 2.942023  | -3.027280 | 1.268362  |
| H | 2.740788  | -2.661015 | -0.454279 |
| H | 3.891013  | 6.073778  | -0.579141 |
| H | 4.643930  | 4.477057  | -0.292593 |
| H | 3.817726  | 4.808239  | -1.840101 |
| H | 1.350806  | 6.234926  | -0.706767 |
| H | 0.345047  | 4.781426  | -0.421618 |
| H | 1.307087  | 4.932131  | -1.923907 |
| H | 3.310288  | 4.116483  | 1.798133  |
| H | 2.596606  | 5.737523  | 1.587916  |
| H | 1.529349  | 4.316830  | 1.781974  |
| H | -7.689522 | -3.337681 | -1.911761 |
| H | -6.057083 | -2.644075 | -2.130774 |
| H | -6.329446 | -3.945399 | -0.931902 |
| H | -9.027484 | -2.826617 | 0.185040  |
| H | -8.276880 | -1.847281 | 1.479866  |
| H | -7.673009 | -3.492435 | 1.144644  |
| H | -7.795266 | 0.025035  | -0.124644 |
| H | -6.914505 | -0.298786 | -1.650381 |
| H | -8.578787 | -0.911043 | -1.424261 |
| H | 4.362567  | -3.470625 | -1.931630 |
| H | 6.651768  | -4.367523 | -2.383274 |
| H | 8.362935  | -4.375331 | -0.573118 |
| H | 7.783461  | -3.500226 | 1.686795  |
| H | 5.484398  | -2.637334 | 2.133985  |
| H | -2.099274 | 0.270740  | -3.746835 |
| H | -0.969273 | -0.447168 | -2.570089 |
| H | -2.695787 | -0.865036 | -2.499528 |
| H | -3.192880 | -0.729926 | 3.348651  |
| H | -1.712960 | -0.351342 | 5.367837  |
| H | 0.613366  | 0.458883  | 5.056290  |
| H | 1.476454  | 0.974695  | 2.767723  |

H -0.048118 1.390491 0.923290

### INS\_R-NBoc

Imaginary frequencies = 1 (-284.5669)

E(MN15,DCE) = -2301.76728

E<sub>Thermal correction</sub> = 0.479434

Pd -0.152818 -0.984550 -0.411201  
C 2.460993 -0.181812 -0.245223  
O 2.393025 -0.493916 -1.435389  
N -2.483478 -0.498189 1.718775  
C -1.748634 -2.029846 -1.275418  
C -1.596324 -2.911864 -2.361964  
C -2.534741 -3.001985 -3.388061  
C -3.679763 -2.203659 -3.364972  
C -3.811537 -1.234096 -2.370613  
C -2.852420 -1.145817 -1.361940  
C -3.120932 0.489512 1.117838  
C -3.894557 1.478602 1.745070  
C -3.956939 1.333224 3.141848  
C -2.543528 -0.604850 3.043427  
C -3.288130 0.305001 3.798167  
S -2.796091 0.499329 -0.655061  
O -3.787307 1.340963 -1.317180  
O 1.445044 -0.077200 0.538830  
N -1.245993 0.792744 -0.933551  
O 0.348192 2.330517 -1.100082  
C 1.098014 3.526331 -0.752743  
C 2.433260 3.307556 -1.450965  
C 1.260518 3.594808 0.762089  
C 0.397507 4.757972 -1.314519  
C -0.843381 2.087696 -0.596285  
O -1.528244 2.856934 0.056373  
C -4.585831 2.623829 1.067186  
C -1.122508 -2.916075 0.201479  
C 0.321430 -2.785425 0.367359  
H -0.735603 -3.588186 -2.358328  
H -2.376780 -3.712600 -4.201867  
H -4.435300 -2.289171 -4.147692  
H -4.609086 -0.489184 -2.410258  
H -4.535919 2.063634 3.713164  
H -1.963863 -1.414358 3.493038  
H -3.332178 0.213076 4.884517

H 3.112345 4.145877 -1.237598  
H 2.282236 3.238864 -2.537926  
H 2.903544 2.371903 -1.117441  
H 2.050518 4.316447 1.018591  
H 0.324909 3.900659 1.247016  
H 1.548042 2.602651 1.138664  
H 0.259918 4.656025 -2.401304  
H 1.020536 5.645223 -1.127029  
H -0.580078 4.903725 -0.838028  
H -5.358098 2.272495 0.370380  
H -3.861075 3.200235 0.476737  
H -5.048035 3.273960 1.821925  
H 0.995320 -3.386647 -0.252661  
H -1.478879 -3.873333 -0.183502  
C 0.827964 -2.482948 1.730675  
O 0.141357 -2.145020 2.672699  
O 2.151341 -2.632275 1.808545  
C 2.742165 -2.208743 3.027035  
H 3.819022 -2.391771 2.938817  
H 2.324363 -2.766103 3.877410  
H 2.550405 -1.136372 3.180527  
H -1.695704 -2.569625 1.065463  
C 3.831777 0.014158 0.408855  
H 4.022244 -0.942658 0.932421  
C 3.906753 1.128172 1.445163  
N 4.810232 0.159195 -0.647468  
H 3.094645 1.020492 2.178068  
H 4.877423 1.072330 1.955325  
H 3.819918 2.115041 0.968263  
H 4.421324 0.092963 -1.588617  
C 6.128179 -0.088565 -0.415876  
O 6.566286 -0.317502 0.702132  
C 7.025099 -0.049412 -1.635473  
H 6.484054 0.164680 -2.566450  
H 7.795450 0.717862 -1.477707  
H 7.541993 -1.014950 -1.722211

### INS\_R-Pyr

Imaginary frequencies = 1 (-312.4032)

E(MN15,DCE) = -2301.78124

E<sub>Thermal correction</sub> = 0.475181

Pd -0.913681 -0.517698 0.380593



|   |           |           |           |
|---|-----------|-----------|-----------|
| C | -4.907539 | 1.034565  | 1.139650  |
| C | -6.075648 | 1.630826  | 0.635471  |
| C | -5.497354 | 0.948428  | -1.589533 |
| C | -6.381933 | 1.592614  | -0.721027 |
| S | -2.542607 | -0.360695 | 0.547155  |
| O | -2.354316 | -0.483532 | 1.989697  |
| O | 1.830925  | 0.333818  | -0.342904 |
| N | -1.424178 | 0.382766  | -0.334554 |
| O | -0.403870 | 2.305133  | -0.801289 |
| C | 0.237664  | 3.550135  | -0.407987 |
| C | 1.366277  | 3.682501  | -1.418885 |
| C | 0.800167  | 3.382835  | 0.999217  |
| C | -0.741042 | 4.712432  | -0.518820 |
| C | -1.341403 | 1.747298  | -0.062946 |
| O | -2.063721 | 2.316076  | 0.741897  |
| C | -4.553580 | 1.160408  | 2.590695  |
| C | -0.058438 | -2.672432 | 1.237824  |
| C | 1.324158  | -2.378164 | 0.883387  |
| H | 0.081720  | -3.990255 | -1.176501 |
| H | -1.761233 | -4.981578 | -2.513120 |
| H | -4.088970 | -4.111486 | -2.277954 |
| H | -4.512603 | -2.083824 | -0.902203 |
| H | -6.738255 | 2.148052  | 1.334139  |
| H | -5.684370 | 0.902795  | -2.666052 |
| H | -7.287264 | 2.065923  | -1.104539 |
| H | 1.968960  | 4.576173  | -1.201729 |
| H | 0.962441  | 3.763604  | -2.438728 |
| H | 1.998030  | 2.785690  | -1.360046 |
| H | 1.416451  | 4.256883  | 1.256643  |
| H | -0.005496 | 3.294025  | 1.740511  |
| H | 1.423431  | 2.475372  | 1.031137  |
| H | -1.168697 | 4.752289  | -1.531984 |
| H | -0.205779 | 5.655805  | -0.333544 |
| H | -1.554181 | 4.611297  | 0.210314  |
| H | -3.579603 | 1.661506  | 2.684108  |
| H | -4.450829 | 0.181169  | 3.075287  |
| H | -5.323227 | 1.746578  | 3.109863  |
| H | 1.915468  | -3.083716 | 0.292800  |
| H | -0.346228 | -3.724078 | 1.305060  |
| C | 2.095743  | -1.519684 | 1.825283  |
| O | 1.602581  | -0.858214 | 2.712955  |
| O | 3.403959  | -1.554285 | 1.566477  |
| C | 4.209460  | -0.678693 | 2.342153  |
| H | 5.253486  | -0.906132 | 2.099987  |
| H | 4.010826  | -0.820189 | 3.413558  |

|   |           |           |           |
|---|-----------|-----------|-----------|
| H | 3.976044  | 0.366981  | 2.082049  |
| H | -0.441490 | -2.081625 | 2.078890  |
| C | 4.041528  | 0.717604  | -1.173315 |
| H | 3.904107  | 1.601651  | -0.532455 |
| C | 4.223712  | 1.123352  | -2.634285 |
| N | 5.156134  | -0.071295 | -0.681372 |
| H | 3.368966  | 1.715164  | -2.994941 |
| H | 5.143308  | 1.713492  | -2.764498 |
| H | 4.297116  | 0.211147  | -3.243587 |
| H | 5.072109  | -1.080562 | -0.810644 |
| C | 6.259462  | 0.365931  | -0.012867 |
| O | 7.099876  | -0.406800 | 0.422383  |
| C | 6.367090  | 1.861959  | 0.203871  |
| H | 7.368612  | 2.073725  | 0.593689  |
| H | 6.192285  | 2.432288  | -0.719796 |
| H | 5.619418  | 2.189344  | 0.944276  |

### INS\_S-Pyr

Imaginary frequencies = 1 (-302.9509)

E(MN15,DCE) = -2301.788241

E<sub>Thermal correction</sub> = 0.475399

|    |           |           |           |
|----|-----------|-----------|-----------|
| Pd | 0.345787  | -0.377223 | 0.715493  |
| C  | 3.036618  | -0.115610 | 0.032828  |
| O  | 3.169212  | -0.909676 | 0.970723  |
| C  | -1.189168 | -1.013067 | 1.940801  |
| C  | -0.840591 | -1.614751 | 3.165647  |
| C  | -1.545812 | -2.705203 | 3.667417  |
| C  | -2.641781 | -3.216143 | 2.964821  |
| C  | -2.979732 | -2.676147 | 1.725052  |
| C  | -2.245799 | -1.598443 | 1.223731  |
| S  | -2.504405 | -1.283122 | -0.526710 |
| O  | -3.735890 | -1.980632 | -0.895724 |
| O  | 1.907924  | 0.244802  | -0.463597 |
| C  | -0.952190 | 0.860845  | 2.116963  |
| C  | 0.400208  | 1.296847  | 1.863944  |
| H  | -0.014958 | -1.185244 | 3.741592  |
| H  | -1.250194 | -3.148105 | 4.620752  |
| H  | -3.219620 | -4.048312 | 3.371183  |
| H  | -3.793552 | -3.084487 | 1.123846  |
| H  | 1.154766  | 1.232747  | 2.654470  |
| H  | -1.263735 | 0.792700  | 3.159807  |
| C  | 0.624980  | 2.355132  | 0.842313  |

|   |           |           |           |
|---|-----------|-----------|-----------|
| O | -0.214260 | 2.751005  | 0.062130  |
| O | 1.879265  | 2.808201  | 0.873573  |
| C | 2.248818  | 3.649086  | -0.208612 |
| H | 3.288898  | 3.948110  | -0.036922 |
| H | 1.597857  | 4.533220  | -0.258065 |
| H | 2.161856  | 3.092262  | -1.153848 |
| H | -1.723479 | 1.304877  | 1.482279  |
| C | -1.098310 | -2.164394 | -1.249720 |
| C | -1.262938 | -2.931378 | -2.411030 |
| N | 0.064704  | -2.008567 | -0.618004 |
| C | -0.104350 | -3.597545 | -2.843657 |
| C | 1.157710  | -2.653767 | -1.040690 |
| C | 1.100041  | -3.483246 | -2.157394 |
| H | -0.163869 | -4.209736 | -3.747342 |
| H | 2.071106  | -2.477844 | -0.464845 |
| H | 1.994042  | -4.009732 | -2.493166 |
| N | -2.240921 | 0.158228  | -1.041708 |
| C | -3.091447 | 1.120395  | -0.512287 |
| O | -3.813322 | 0.934753  | 0.459359  |
| O | -3.000697 | 2.245300  | -1.194045 |
| C | -3.677365 | 3.457542  | -0.773651 |
| C | -3.078309 | 4.508173  | -1.697920 |
| C | -3.357572 | 3.800497  | 0.679416  |
| C | -5.174963 | 3.293200  | -1.001204 |
| H | -3.260874 | 4.239599  | -2.748340 |
| H | -1.992212 | 4.556665  | -1.532485 |
| H | -3.524079 | 5.493271  | -1.497503 |
| H | -3.855360 | 3.112989  | 1.374100  |
| H | -3.702076 | 4.825294  | 0.884809  |
| H | -2.269713 | 3.758262  | 0.833402  |
| H | -5.692664 | 4.233548  | -0.759713 |
| H | -5.573022 | 2.495150  | -0.360007 |
| H | -5.376026 | 3.045590  | -2.054152 |
| C | -2.535853 | -3.031381 | -3.203761 |
| H | -2.987045 | -2.041836 | -3.353844 |
| H | -3.287923 | -3.636856 | -2.680608 |
| H | -2.323359 | -3.483854 | -4.181473 |
| C | 4.254089  | 0.483413  | -0.661968 |
| H | 4.209720  | 1.577702  | -0.517033 |
| C | 4.219306  | 0.205040  | -2.163406 |
| N | 5.443882  | -0.024172 | -0.020125 |
| H | 3.315073  | 0.643470  | -2.606886 |
| H | 5.109759  | 0.647406  | -2.629588 |
| H | 4.215293  | -0.880375 | -2.352213 |
| H | 5.282161  | -0.741823 | 0.684965  |

|   |          |           |           |
|---|----------|-----------|-----------|
| C | 6.636883 | 0.613126  | -0.151545 |
| O | 6.780375 | 1.586299  | -0.877330 |
| C | 7.783294 | 0.033276  | 0.650134  |
| H | 7.487974 | -0.813944 | 1.283088  |
| H | 8.569813 | -0.289256 | -0.046084 |
| H | 8.210610 | 0.828934  | 1.275281  |

### Int-1\_NBoc\_R

Imaginary frequencies = 0

E(MN15,DCE) = -2573.154866

E<sub>Thermal correction</sub> = 0.602481

|    |           |           |           |
|----|-----------|-----------|-----------|
| Pd | -0.248231 | 0.320511  | -0.161893 |
| C  | 1.802778  | -0.536541 | -1.811637 |
| O  | 2.535624  | -1.290179 | -2.423666 |
| C  | 3.179187  | 0.325390  | 0.072487  |
| C  | 2.319155  | 0.735787  | -1.140627 |
| N  | 1.172086  | 1.514886  | -0.735357 |
| N  | -3.439552 | 1.370056  | -0.403594 |
| C  | -4.027299 | 0.316020  | 0.134712  |
| C  | -5.318554 | -0.151141 | -0.146256 |
| C  | -5.999750 | 0.632472  | -1.093605 |
| C  | -4.104054 | 2.092885  | -1.299131 |
| C  | -5.406526 | 1.750240  | -1.673154 |
| S  | -2.899763 | -0.532693 | 1.257292  |
| O  | -3.626890 | -1.430698 | 2.145157  |
| O  | 0.530034  | -0.782417 | -1.598223 |
| C  | 3.779849  | 1.527130  | 0.773762  |
| O  | 2.389175  | -0.356403 | 1.031264  |
| C  | 2.300291  | -1.769594 | 0.946038  |
| O  | 2.156616  | 3.438513  | -1.314337 |
| C  | 2.338666  | 4.868434  | -1.264172 |
| C  | 3.765172  | 5.056573  | -1.764736 |
| C  | 1.349451  | 5.565473  | -2.192229 |
| C  | 2.216319  | 5.362432  | 0.175590  |
| C  | 1.043273  | 2.845197  | -0.829707 |
| O  | 0.033824  | 3.470299  | -0.496432 |
| N  | -1.660976 | -1.121800 | 0.437071  |
| O  | -0.910603 | -2.937087 | -0.608192 |
| C  | -0.842952 | -3.924559 | -1.681007 |
| C  | -1.327920 | -3.294919 | -2.980846 |
| C  | 0.642655  | -4.240840 | -1.768684 |
| C  | -1.659081 | -5.146800 | -1.281855 |

|   |           |           |           |
|---|-----------|-----------|-----------|
| C | -1.989286 | -2.240575 | -0.351520 |
| O | -3.131960 | -2.491923 | -0.691417 |
| C | 3.649869  | -2.442920 | 1.005865  |
| C | 4.114214  | -3.214189 | -0.064821 |
| C | 5.372489  | -3.820564 | -0.004038 |
| C | 6.179101  | -3.647978 | 1.121085  |
| C | 5.728492  | -2.862322 | 2.187175  |
| C | 4.471432  | -2.262961 | 2.127713  |
| C | -5.949706 | -1.373670 | 0.448868  |
| C | -2.203761 | 0.630177  | 3.574325  |
| C | -1.395416 | 1.444663  | 4.375740  |
| C | -0.440687 | 2.282375  | 3.797511  |
| C | -0.293337 | 2.338683  | 2.407525  |
| C | -1.100907 | 1.545918  | 1.592073  |
| C | -2.043965 | 0.703283  | 2.196423  |
| H | 3.975525  | -0.340984 | -0.308062 |
| H | 2.954247  | 1.281482  | -1.854257 |
| H | -7.013701 | 0.339530  | -1.378302 |
| H | -3.584075 | 2.954905  | -1.725112 |
| H | -5.943102 | 2.347847  | -2.411686 |
| H | 4.367923  | 2.143209  | 0.078196  |
| H | 4.419489  | 1.194578  | 1.603645  |
| H | 2.965414  | 2.145484  | 1.185393  |
| H | 1.688406  | -2.064616 | 1.812645  |
| H | 1.751385  | -2.097992 | 0.047090  |
| H | 4.024311  | 6.125043  | -1.789049 |
| H | 4.472687  | 4.535371  | -1.102274 |
| H | 3.868715  | 4.643197  | -2.778357 |
| H | 1.568642  | 6.643555  | -2.225746 |
| H | 0.322112  | 5.414250  | -1.839499 |
| H | 1.443043  | 5.160960  | -3.211226 |
| H | 2.871065  | 4.763456  | 0.829248  |
| H | 2.536263  | 6.413392  | 0.237455  |
| H | 1.180001  | 5.282584  | 0.528072  |
| H | -1.113226 | -3.980316 | -3.813749 |
| H | -2.408196 | -3.099954 | -2.954763 |
| H | -0.783335 | -2.353627 | -3.145211 |
| H | 0.811005  | -5.028771 | -2.517569 |
| H | 1.015058  | -4.596114 | -0.795321 |
| H | 1.201870  | -3.338772 | -2.063304 |
| H | -1.294070 | -5.554706 | -0.327465 |
| H | -2.721622 | -4.889010 | -1.181253 |
| H | -1.552739 | -5.923981 | -2.053076 |
| H | 3.489993  | -3.311537 | -0.957315 |
| H | 5.726956  | -4.420280 | -0.845449 |

|   |           |           |           |
|---|-----------|-----------|-----------|
| H | 7.163488  | -4.119667 | 1.167438  |
| H | 6.360747  | -2.721242 | 3.067126  |
| H | 4.112499  | -1.643343 | 2.954932  |
| H | -6.935512 | -1.541762 | -0.004324 |
| H | -5.308464 | -2.247785 | 0.270409  |
| H | -6.063807 | -1.276752 | 1.536804  |
| H | -2.924640 | -0.069936 | 4.001237  |
| H | -1.505106 | 1.407377  | 5.461282  |
| H | 0.193796  | 2.901571  | 4.434503  |
| H | 0.424250  | 3.007637  | 1.927683  |
| H | -1.145057 | 1.831136  | 0.496362  |

### Int-1\_NBoc\_S

Imaginary frequencies = 0

E(MN15,DCE) = -2573.152779

E<sub>Thermal correction</sub> = 0.601732

|    |           |           |           |
|----|-----------|-----------|-----------|
| Pd | -0.278994 | -0.705414 | -0.604806 |
| C  | -1.826366 | 1.320177  | -1.684205 |
| O  | -2.129000 | 2.418223  | -2.112387 |
| C  | -2.912849 | 1.181481  | 0.551532  |
| C  | -2.779014 | 0.492721  | -0.822100 |
| N  | -2.216033 | -0.830012 | -0.690139 |
| N  | 3.889286  | -0.225695 | 1.681863  |
| C  | 4.122591  | -1.093800 | 0.712922  |
| C  | 5.377817  | -1.468044 | 0.211001  |
| C  | 6.451681  | -0.851007 | 0.874881  |
| C  | 4.925423  | 0.349077  | 2.284898  |
| C  | 6.239028  | 0.052812  | 1.910801  |
| S  | 2.592170  | -1.710823 | -0.018420 |
| O  | 2.824294  | -2.831118 | -0.918091 |
| O  | -0.638304 | 0.784356  | -1.846328 |
| C  | -3.891499 | 0.457521  | 1.454262  |
| O  | -1.664038 | 1.188825  | 1.222577  |
| C  | -0.810495 | 2.305432  | 1.034001  |
| O  | -4.220096 | -1.804601 | -0.888893 |
| C  | -5.157337 | -2.891251 | -0.741044 |
| C  | -6.510911 | -2.199612 | -0.843663 |
| C  | -4.984410 | -3.901961 | -1.869626 |
| C  | -4.999340 | -3.536895 | 0.633727  |
| C  | -2.889317 | -1.987805 | -0.744779 |
| O  | -2.363128 | -3.098025 | -0.650285 |
| N  | 1.790558  | -0.427535 | -0.528305 |



|   |           |           |           |
|---|-----------|-----------|-----------|
| O | 1.949051  | 1.651866  | -1.303514 |
| C | 2.235993  | 2.657784  | -2.320963 |
| C | 2.064291  | 2.020886  | -3.693711 |
| C | 1.167830  | 3.714315  | -2.082977 |
| C | 3.634537  | 3.221702  | -2.103596 |
| C | 2.547209  | 0.484971  | -1.274684 |
| O | 3.628537  | 0.198908  | -1.760755 |
| C | -1.457010 | 3.608635  | 1.436797  |
| C | -1.697926 | 4.610117  | 0.489836  |
| C | -2.314232 | 5.806243  | 0.869353  |
| C | -2.705230 | 6.002612  | 2.194180  |
| C | -2.484974 | 4.997445  | 3.141758  |
| C | -1.865797 | 3.807281  | 2.763117  |
| C | 5.616795  | -2.366473 | -0.964623 |
| C | 1.943923  | -2.368193 | 2.623258  |
| C | 0.989786  | -2.685365 | 3.595914  |
| C | -0.359398 | -2.803762 | 3.261167  |
| C | -0.771843 | -2.642566 | 1.936558  |
| C | 0.168260  | -2.338536 | 0.949937  |
| C | 1.515956  | -2.181663 | 1.314342  |
| H | -3.249912 | 2.217714  | 0.363046  |
| H | -3.767450 | 0.472432  | -1.304817 |
| H | 7.468161  | -1.080625 | 0.545297  |
| H | 4.704785  | 1.065465  | 3.080955  |
| H | 7.078562  | 0.534376  | 2.414712  |
| H | -4.877748 | 0.360413  | 0.977775  |
| H | -3.992925 | 0.997817  | 2.406225  |
| H | -3.504306 | -0.552854 | 1.664544  |
| H | 0.065097  | 2.100086  | 1.669532  |
| H | -0.438808 | 2.372579  | -0.002089 |
| H | -7.323868 | -2.935620 | -0.761386 |
| H | -6.621318 | -1.457939 | -0.038048 |
| H | -6.598784 | -1.680485 | -1.808957 |
| H | -5.770507 | -4.669497 | -1.803466 |
| H | -4.000838 | -4.383031 | -1.806478 |
| H | -5.074703 | -3.396276 | -2.842639 |
| H | -5.015907 | -2.757274 | 1.412752  |
| H | -5.835945 | -4.227122 | 0.819292  |
| H | -4.055958 | -4.093837 | 0.696780  |
| H | 2.131630  | 2.797877  | -4.468952 |
| H | 2.841566  | 1.267903  | -3.883914 |
| H | 1.071472  | 1.549906  | -3.744607 |
| H | 1.306026  | 4.545825  | -2.789752 |
| H | 1.245034  | 4.110399  | -1.058277 |
| H | 0.165744  | 3.281053  | -2.227497 |

|   |           |           |           |
|---|-----------|-----------|-----------|
| H | 3.727072  | 3.623351  | -1.083144 |
| H | 4.398364  | 2.449121  | -2.258085 |
| H | 3.807363  | 4.044231  | -2.813375 |
| H | -1.423683 | 4.428924  | -0.553292 |
| H | -2.499602 | 6.581846  | 0.122790  |
| H | -3.189108 | 6.936366  | 2.490232  |
| H | -2.796362 | 5.146560  | 4.178494  |
| H | -1.694167 | 3.013568  | 3.496321  |
| H | 6.693290  | -2.429537 | -1.170314 |
| H | 5.216377  | -3.375028 | -0.800428 |
| H | 5.097913  | -1.958058 | -1.843745 |
| H | 2.991587  | -2.249071 | 2.897180  |
| H | 1.311419  | -2.830867 | 4.629012  |
| H | -1.093527 | -3.038370 | 4.033972  |
| H | -1.810713 | -2.778191 | 1.630388  |
| H | -0.170585 | -2.512391 | -0.122408 |

### Int-1\_Pyr\_R\_cis

Imaginary frequencies = 0

E(MN15,DCE) = -2573.148946

E<sub>Thermal correction</sub> = 0.604898

|    |           |           |           |
|----|-----------|-----------|-----------|
| Pd | -0.850818 | -0.339006 | -1.046024 |
| C  | 1.668673  | -1.379033 | -1.744543 |
| O  | 2.487827  | -2.186107 | -2.129778 |
| C  | 2.838958  | 0.174940  | -0.059785 |
| C  | 1.998145  | 0.058809  | -1.371303 |
| N  | 0.745796  | 0.792312  | -1.216216 |
| N  | -2.257107 | -1.927755 | -0.987976 |
| C  | -3.124197 | -2.164845 | 0.006892  |
| C  | -3.807106 | -3.372322 | 0.191843  |
| C  | -3.569835 | -4.343806 | -0.797095 |
| C  | -2.059299 | -2.866247 | -1.921932 |
| C  | -2.721002 | -4.091121 | -1.864177 |
| S  | -3.409261 | -0.753863 | 1.083758  |
| O  | -4.639666 | -0.973744 | 1.835416  |
| O  | 0.398835  | -1.709845 | -1.595428 |
| C  | 2.456091  | -0.883535 | 0.965318  |
| O  | 4.218956  | 0.332289  | -0.289822 |
| C  | 4.939109  | -0.708792 | -0.910773 |
| O  | 1.975746  | 2.618614  | -1.535163 |
| C  | 2.404357  | 3.978363  | -1.308326 |
| C  | 3.853166  | 3.952638  | -1.779228 |







|   |           |           |           |                                            |           |           |           |
|---|-----------|-----------|-----------|--------------------------------------------|-----------|-----------|-----------|
| N | -1.540438 | -1.861458 | -0.471056 | H                                          | 4.149170  | 2.443199  | 0.548008  |
| C | -2.779169 | -2.058893 | 0.007233  | H                                          | 4.700270  | 1.059118  | 1.550063  |
| C | -3.686110 | -2.995388 | -0.502228 | H                                          | 3.061607  | 1.739586  | 1.772422  |
| C | -3.181543 | -3.817186 | -1.522354 | H                                          | 2.597547  | -2.611649 | 0.794815  |
| C | -1.086327 | -2.658645 | -1.450977 | H                                          | 2.293837  | -1.913170 | -0.808037 |
| C | -1.880159 | -3.669516 | -1.984442 | H                                          | 2.523681  | 6.567159  | 0.683791  |
| S | -3.215995 | -0.955202 | 1.384662  | H                                          | 3.430939  | 5.027319  | 0.629262  |
| O | -4.373409 | -1.500035 | 2.085545  | H                                          | 2.472572  | 5.548365  | -0.784785 |
| O | 0.512539  | -0.348224 | -1.832941 | H                                          | -0.033754 | 6.500324  | 0.787161  |
| C | 3.840789  | 1.504102  | 1.029133  | H                                          | -0.873643 | 4.917394  | 0.769674  |
| O | 2.896969  | -0.631946 | 0.732657  | H                                          | -0.026307 | 5.507329  | -0.694682 |
| C | 2.969463  | -1.873129 | 0.065704  | H                                          | 2.284891  | 4.148358  | 2.674383  |
| O | 1.405608  | 3.480754  | 0.278328  | H                                          | 1.439518  | 5.712512  | 2.816561  |
| C | 1.290453  | 4.796349  | 0.866385  | H                                          | 0.497691  | 4.190472  | 2.797528  |
| C | 2.504861  | 5.531623  | 0.314301  | H                                          | -3.983463 | 3.059398  | -3.771556 |
| C | 0.002095  | 5.468898  | 0.405100  | H                                          | -4.865251 | 2.063701  | -2.578028 |
| C | 1.376699  | 4.701684  | 2.386707  | H                                          | -4.148647 | 3.631415  | -2.087612 |
| C | 0.554793  | 2.482864  | 0.592468  | H                                          | -1.387865 | 3.338887  | -3.473469 |
| O | -0.450269 | 2.634971  | 1.280454  | H                                          | -0.599991 | 2.401228  | -2.163114 |
| N | -3.105384 | 0.492647  | 0.869939  | H                                          | -1.627959 | 3.804220  | -1.756336 |
| O | -2.736191 | 1.698635  | -0.946765 | H                                          | -1.599988 | 0.238515  | -2.845191 |
| C | -2.713309 | 2.032154  | -2.358949 | H                                          | -3.357674 | 0.130016  | -3.217220 |
| C | -4.011583 | 2.741170  | -2.718914 | H                                          | -2.269130 | 1.106020  | -4.245327 |
| C | -1.507256 | 2.958286  | -2.448867 | H                                          | 3.910934  | -2.256940 | -2.468786 |
| C | -2.480834 | 0.788746  | -3.213241 | H                                          | 6.239856  | -2.842697 | -3.154553 |
| C | -3.478189 | 0.722427  | -0.448204 | H                                          | 8.021566  | -3.079416 | -1.430211 |
| O | -4.318813 | 0.082253  | -1.058918 | H                                          | 7.472907  | -2.739548 | 0.976498  |
| C | 4.373328  | -2.226968 | -0.365242 | H                                          | 5.136280  | -2.183461 | 1.652252  |
| C | 4.691113  | -2.399819 | -1.716065 | H                                          | -5.648525 | -3.793952 | -0.760207 |
| C | 5.999555  | -2.711474 | -2.097114 | H                                          | -5.239077 | -3.433820 | 0.946710  |
| C | 6.998641  | -2.838599 | -1.131700 | H                                          | -5.596164 | -2.105870 | -0.160760 |
| C | 6.690694  | -2.647296 | 0.219286  | H                                          | -2.618277 | -2.857560 | 3.429158  |
| C | 5.384931  | -2.341261 | 0.598610  | H                                          | -0.489401 | -3.263117 | 4.709484  |
| C | -5.126423 | -3.096982 | -0.091461 | H                                          | 1.474771  | -1.784992 | 4.359825  |
| C | -1.745447 | -2.213471 | 3.304480  | H                                          | 1.329362  | 0.148845  | 2.764665  |
| C | -0.556485 | -2.427995 | 4.009077  | H                                          | -0.878706 | 0.713398  | 1.713039  |
| C | 0.548342  | -1.591529 | 3.815628  |                                            |           |           |           |
| C | 0.474435  | -0.508098 | 2.936108  |                                            |           |           |           |
| C | -0.714496 | -0.269481 | 2.236372  |                                            |           |           |           |
| C | -1.790874 | -1.139894 | 2.422022  |                                            |           |           |           |
| H | 4.067902  | 0.262625  | -0.730934 |                                            |           |           |           |
| H | 2.424294  | 2.058620  | -1.219774 |                                            |           |           |           |
| H | -3.841158 | -4.569729 | -1.961892 |                                            |           |           |           |
| H | -0.086421 | -2.435457 | -1.827262 |                                            |           |           |           |
| H | -1.483098 | -4.304773 | -2.776663 |                                            |           |           |           |
|   |           |           |           | <b>int-1_SO-R</b>                          |           |           |           |
|   |           |           |           | Imaginary frequencies = 0                  |           |           |           |
|   |           |           |           | E(MN15,DCE) = -2573.130298                 |           |           |           |
|   |           |           |           | E <sub>Thermal</sub> correction = 0.598023 |           |           |           |
|   |           |           |           | Pd                                         | -0.143251 | 0.566133  | -0.865557 |

|   |           |           |           |   |           |           |           |
|---|-----------|-----------|-----------|---|-----------|-----------|-----------|
| C | 2.326996  | 0.488974  | -2.130523 | H | 4.138286  | 0.279856  | -0.237794 |
| O | 3.318828  | -0.031578 | -2.612630 | H | 3.146791  | 2.302428  | -1.336967 |
| C | 3.297285  | 0.833833  | 0.221751  | H | 1.613216  | -4.782945 | -1.244838 |
| C | 2.529371  | 1.475805  | -0.950938 | H | 0.003717  | -4.491035 | 2.753010  |
| N | 1.222855  | 1.962599  | -0.528337 | H | 1.684407  | -5.481056 | 1.152584  |
| N | -0.861221 | -3.289771 | 1.303763  | H | 4.458358  | 2.610978  | 0.688334  |
| C | -0.859224 | -2.916399 | 0.036433  | H | 4.376994  | 1.391241  | 2.000459  |
| C | -0.024249 | -3.409034 | -0.978808 | H | 2.958216  | 2.407275  | 1.647153  |
| C | 0.904567  | -4.362484 | -0.526520 | H | 1.430726  | -1.734765 | 1.064408  |
| C | 0.023105  | -4.201183 | 1.698714  | H | 1.871156  | -1.272243 | -0.592737 |
| C | 0.944110  | -4.757752 | 0.806761  | H | 3.347330  | 6.932521  | 0.630108  |
| S | -2.070379 | -1.628848 | -0.282582 | H | 3.913695  | 5.243056  | 0.789937  |
| O | -1.553801 | -0.800121 | -1.439946 | H | 3.630714  | 5.940978  | -0.829811 |
| O | 1.097000  | 0.284410  | -2.482014 | H | 0.977518  | 7.366367  | -0.195057 |
| C | 3.812875  | 1.878191  | 1.193865  | H | -0.116236 | 6.003555  | -0.553013 |
| O | 2.477130  | -0.030966 | 0.973048  | H | 1.272303  | 6.347649  | -1.627578 |
| C | 2.243611  | -1.318250 | 0.447045  | H | 1.968242  | 4.583305  | 2.240270  |
| O | 1.912157  | 4.113167  | -0.348002 | H | 1.467058  | 6.291984  | 2.202402  |
| C | 1.827329  | 5.443514  | 0.257503  | H | 0.297290  | 5.024611  | 1.760196  |
| C | 3.271194  | 5.920434  | 0.208604  | H | -6.862240 | 1.164684  | 1.262507  |
| C | 0.927864  | 6.338576  | -0.583402 | H | -6.755134 | -0.584326 | 0.904221  |
| C | 1.352894  | 5.320239  | 1.700907  | H | -5.494179 | 0.212758  | 1.898546  |
| C | 0.963747  | 3.208533  | -0.326813 | H | -5.235173 | 2.803156  | 0.139243  |
| O | -0.274435 | 3.629040  | -0.122563 | H | -3.919509 | 2.131840  | -0.875135 |
| N | -3.403220 | -2.387625 | -0.452157 | H | -3.922429 | 1.840627  | 0.890147  |
| O | -4.341858 | -0.327240 | -0.424046 | H | -5.637177 | 0.979182  | -2.337108 |
| C | -5.369487 | 0.668585  | -0.212120 | H | -6.783817 | -0.186843 | -1.609017 |
| C | -6.173666 | 0.336017  | 1.040268  | H | -6.986514 | 1.568422  | -1.326244 |
| C | -4.562701 | 1.944415  | -0.001369 | H | 3.763982  | -2.205807 | -1.634008 |
| C | -6.250868 | 0.759852  | -1.450961 | H | 5.709706  | -3.772763 | -1.537412 |
| C | -4.588874 | -1.651430 | -0.491530 | H | 6.501667  | -4.640624 | 0.659266  |
| O | -5.683163 | -2.146988 | -0.568715 | H | 5.353130  | -3.943227 | 2.757558  |
| C | 3.447369  | -2.228410 | 0.498864  | H | 3.394560  | -2.399588 | 2.648754  |
| C | 4.105067  | -2.611505 | -0.676028 | H | 0.504580  | -3.726965 | -3.021995 |
| C | 5.200026  | -3.479540 | -0.616769 | H | -1.073670 | -2.913447 | -2.803432 |
| C | 5.646551  | -3.962091 | 0.614239  | H | 0.420882  | -2.002239 | -2.560128 |
| C | 5.001738  | -3.570267 | 1.792471  | H | -3.290797 | -1.682286 | 2.327425  |
| C | 3.908543  | -2.706834 | 1.733016  | H | -3.042336 | -0.073803 | 4.262081  |
| C | -0.047798 | -2.992627 | -2.420696 | H | -1.479224 | 1.851295  | 4.041038  |
| C | -2.649314 | -0.799149 | 2.266224  | H | -0.212635 | 2.234330  | 1.975350  |
| C | -2.500418 | 0.088150  | 3.328464  | H | -0.869574 | 2.845661  | -0.167289 |
| C | -1.623034 | 1.172467  | 3.196783  |   |           |           |           |
| C | -0.915047 | 1.397154  | 2.012929  |   |           |           |           |
| C | -1.082487 | 0.560735  | 0.893124  |   |           |           |           |
| C | -1.942412 | -0.528282 | 1.096436  |   |           |           |           |

int-1\_SO-S

Imaginary frequencies = 0  
E(MN15,DCE) = -2573.145439  
E<sub>Thermal correction</sub> = 0.598038

|    |           |           |           |
|----|-----------|-----------|-----------|
| Pd | 0.371397  | 0.018444  | -0.205769 |
| C  | 2.349366  | -0.839458 | -2.011726 |
| O  | 3.035469  | -1.540223 | -2.734884 |
| C  | 3.797935  | -0.733519 | 0.031344  |
| C  | 3.070679  | 0.108967  | -1.027880 |
| N  | 2.087410  | 0.993457  | -0.413352 |
| N  | -3.226860 | 2.307529  | -0.054395 |
| C  | -2.785110 | 1.236511  | -0.690394 |
| C  | -2.603962 | 1.099489  | -2.077016 |
| C  | -2.916398 | 2.267008  | -2.793745 |
| C  | -3.521407 | 3.393572  | -0.764005 |
| C  | -3.370312 | 3.416014  | -2.151889 |
| S  | -2.458778 | -0.092976 | 0.498070  |
| O  | -1.436874 | -1.011315 | -0.136778 |
| O  | 1.057915  | -0.850362 | -1.921939 |
| C  | 4.605057  | 0.113140  | 0.996880  |
| O  | 2.875017  | -1.475185 | 0.798685  |
| C  | 2.565800  | -2.791308 | 0.361760  |
| O  | 3.435760  | 2.803158  | -0.603790 |
| C  | 3.941005  | 4.079942  | -0.098593 |
| C  | 5.382403  | 4.083353  | -0.586117 |
| C  | 3.162305  | 5.235135  | -0.713819 |
| C  | 3.888980  | 4.076568  | 1.424311  |
| C  | 2.288641  | 2.258869  | -0.269260 |
| O  | 1.346980  | 3.068011  | 0.181784  |
| N  | -3.746160 | -0.694853 | 1.103793  |
| O  | -5.793842 | -1.522745 | 0.876164  |
| C  | -6.975538 | -2.010625 | 0.191244  |
| C  | -6.625835 | -3.224013 | -0.663449 |
| C  | -7.895352 | -2.412542 | 1.336277  |
| C  | -7.605452 | -0.892298 | -0.632385 |
| C  | -4.733461 | -1.080855 | 0.212545  |
| O  | -4.646472 | -1.013710 | -1.003604 |
| C  | 3.790187  | -3.667480 | 0.257307  |
| C  | 4.216265  | -4.153184 | -0.983903 |
| C  | 5.365384  | -4.944362 | -1.072452 |
| C  | 6.100576  | -5.243382 | 0.075297  |
| C  | 5.689464  | -4.745578 | 1.316130  |
| C  | 4.540731  | -3.960542 | 1.404692  |
| C  | -2.152465 | -0.138575 | -2.789993 |
| C  | -2.209150 | 1.026899  | 3.010510  |

|   |           |           |           |
|---|-----------|-----------|-----------|
| C | -1.392871 | 1.541203  | 4.016484  |
| C | -0.013781 | 1.657639  | 3.800411  |
| C | 0.568021  | 1.280015  | 2.585970  |
| C | -0.220923 | 0.772910  | 1.539317  |
| C | -1.590934 | 0.663253  | 1.818329  |
| H | 4.464183  | -1.409674 | -0.534730 |
| H | 3.819604  | 0.684183  | -1.592031 |
| H | -2.805841 | 2.252223  | -3.881191 |
| H | -3.885734 | 4.266245  | -0.214449 |
| H | -3.612039 | 4.315973  | -2.719922 |
| H | 5.306597  | 0.772285  | 0.463590  |
| H | 5.165930  | -0.537767 | 1.681997  |
| H | 3.921395  | 0.732857  | 1.600754  |
| H | 1.875943  | -3.184628 | 1.123071  |
| H | 2.024718  | -2.783513 | -0.598823 |
| H | 5.883791  | 5.008429  | -0.268754 |
| H | 5.927841  | 3.223766  | -0.170160 |
| H | 5.414159  | 4.021313  | -1.683013 |
| H | 3.655529  | 6.181724  | -0.448447 |
| H | 2.127680  | 5.265764  | -0.351982 |
| H | 3.157718  | 5.145472  | -1.809852 |
| H | 4.417164  | 3.194118  | 1.816748  |
| H | 4.391558  | 4.976445  | 1.807152  |
| H | 2.855217  | 4.075175  | 1.795203  |
| H | -7.550235 | -3.662774 | -1.067493 |
| H | -5.970997 | -2.944789 | -1.497704 |
| H | -6.122273 | -3.985318 | -0.049184 |
| H | -8.843435 | -2.804145 | 0.940384  |
| H | -8.108628 | -1.543980 | 1.975768  |
| H | -7.418960 | -3.189012 | 1.951631  |
| H | -7.797698 | -0.016544 | 0.005692  |
| H | -6.950296 | -0.598033 | -1.461327 |
| H | -8.566294 | -1.238187 | -1.041599 |
| H | 3.653513  | -3.878252 | -1.880624 |
| H | 5.691452  | -5.320164 | -2.044963 |
| H | 6.998860  | -5.861389 | 0.005102  |
| H | 6.265454  | -4.976085 | 2.215617  |
| H | 4.211942  | -3.566306 | 2.370934  |
| H | -2.310788 | -0.015011 | -3.869883 |
| H | -1.084556 | -0.348795 | -2.617586 |
| H | -2.722218 | -1.007489 | -2.437617 |
| H | -3.284991 | 0.886144  | 3.130267  |
| H | -1.825596 | 1.839065  | 4.973298  |
| H | 0.622480  | 2.041860  | 4.601597  |
| H | 1.651773  | 1.364928  | 2.453818  |

H 0.560812 2.522514 0.414460

### Int-2\_NBoc\_R

Imaginary frequencies = 0

E(MN15,DCE) = -2573.181292

E<sub>Thermal correction</sub> = 0.60518

Pd -0.229916 -0.013062 0.138375  
C 1.801907 -0.203500 -1.790517  
O 2.748015 -0.667904 -2.408841  
C 3.060964 1.203202 -0.099535  
C 1.959460 1.209717 -1.172201  
N 0.676145 1.597910 -0.607596  
N -3.254676 0.654887 -0.540124  
C -3.720507 -0.490283 -0.055762  
C -4.838655 -1.185598 -0.544537  
C -5.448386 -0.577620 -1.656505  
C -3.852855 1.205616 -1.592354  
C -4.964398 0.610214 -2.191536  
S -2.735671 -1.126800 1.334636  
O -3.552205 -2.024932 2.140038  
O 0.680793 -0.796384 -1.546974  
C 3.381139 2.603304 0.388467  
O 2.669892 0.453555 1.029139  
C 2.923013 -0.942786 1.007149  
O 0.714476 3.694328 -1.470649  
C 0.397585 5.110704 -1.310742  
C 1.592933 5.796730 -1.955674  
C -0.886137 5.453858 -2.056039  
C 0.321241 5.446442 0.174146  
C 0.089129 2.717229 -0.846174  
O -1.175817 2.926745 -0.519378  
N -1.317581 -1.642129 0.767950  
O -0.118573 -3.208858 -0.235402  
C 0.222307 -4.179418 -1.268222  
C -0.422118 -3.791677 -2.593955  
C 1.736126 -4.057244 -1.371424  
C -0.209642 -5.560330 -0.793057  
C -1.348576 -2.802504 -0.016741  
O -2.377339 -3.324421 -0.407026  
C 4.395948 -1.257831 0.902103  
C 4.907352 -1.947785 -0.202197  
C 6.276085 -2.218518 -0.291338

C 7.142300 -1.790332 0.714920  
C 6.639544 -1.083854 1.812658  
C 5.274064 -0.818920 1.903407  
C -5.391168 -2.463779 0.013944  
C -2.886628 0.695552 3.350775  
C -2.360307 1.774903 4.056640  
C -1.167956 2.373234 3.622379  
C -0.488652 1.916590 2.489103  
C -0.991171 0.834702 1.748123  
C -2.181813 0.277074 2.222735  
H 3.948186 0.750028 -0.579748  
H 2.267281 1.895961 -1.976275  
H -6.319880 -1.065293 -2.100902  
H -3.432127 2.144569 -1.964664  
H -5.439771 1.072459 -3.057916  
H 3.672590 3.259115 -0.445396  
H 4.196710 2.566233 1.123744  
H 2.493050 3.032054 0.881906  
H 2.516461 -1.317413 1.958701  
H 2.366095 -1.452287 0.200855  
H 1.478867 6.888319 -1.896527  
H 2.519556 5.506907 -1.439262  
H 1.675017 5.505339 -3.012383  
H -1.015795 6.546092 -2.067655  
H -1.763582 5.001983 -1.577866  
H -0.821684 5.103922 -3.096685  
H 1.253797 5.146644 0.676634  
H 0.198003 6.532065 0.297587  
H -0.526826 4.944546 0.660020  
H 0.008987 -4.414837 -3.391502  
H -1.509076 -3.941212 -2.575839  
H -0.190893 -2.737127 -2.803375  
H 2.124765 -4.816355 -2.066346  
H 2.200533 -4.211335 -0.385239  
H 2.002253 -3.056398 -1.747061  
H 0.273047 -5.804694 0.164939  
H -1.300461 -5.598464 -0.667656  
H 0.088346 -6.315833 -1.535104  
H 4.226454 -2.243464 -1.004703  
H 6.666556 -2.756993 -1.157863  
H 8.212083 -2.000781 0.643728  
H 7.316377 -0.743668 2.600185  
H 4.872082 -0.265116 2.756978  
H -6.212365 -2.818990 -0.622759  
H -4.604809 -3.227842 0.065062



|   |           |           |           |
|---|-----------|-----------|-----------|
| H | -5.763520 | -2.318789 | 1.036988  |
| H | -3.795978 | 0.177050  | 3.664325  |
| H | -2.865027 | 2.142936  | 4.951754  |
| H | -0.755587 | 3.209956  | 4.192127  |
| H | 0.448692  | 2.388995  | 2.178246  |
| H | -1.575444 | 2.087097  | -0.177594 |

### Int-2\_NBoc\_S

Imaginary frequencies = 0

E(MN15,DCE) = -2573.181108

E<sub>Thermal correction</sub> = 0.604568

|    |           |           |           |
|----|-----------|-----------|-----------|
| Pd | -0.184117 | -0.589017 | -0.535453 |
| C  | -1.921432 | 1.272723  | -1.714959 |
| O  | -2.362184 | 2.351736  | -2.086890 |
| C  | -3.062073 | 1.092452  | 0.541607  |
| C  | -2.819704 | 0.397397  | -0.810442 |
| N  | -2.168200 | -0.890960 | -0.621865 |
| N  | 3.841503  | -0.467508 | 1.830146  |
| C  | 4.158865  | -1.018088 | 0.671895  |
| C  | 5.451450  | -1.159712 | 0.143667  |
| C  | 6.459949  | -0.665871 | 0.987909  |
| C  | 4.816359  | -0.002803 | 2.604612  |
| C  | 6.156128  | -0.089562 | 2.217360  |
| S  | 2.691234  | -1.574504 | -0.222533 |
| O  | 3.056018  | -2.490990 | -1.296595 |
| O  | -0.745838 | 0.800601  | -1.955490 |
| C  | -4.091683 | 0.358870  | 1.380552  |
| O  | -1.879383 | 1.146810  | 1.306537  |
| C  | -1.011188 | 2.250423  | 1.093429  |
| O  | -4.086880 | -2.057066 | -0.944890 |
| C  | -4.941371 | -3.208729 | -0.664122 |
| C  | -6.340349 | -2.629611 | -0.816510 |
| C  | -4.699083 | -4.308024 | -1.690129 |
| C  | -4.708359 | -3.676569 | 0.767684  |
| C  | -2.789041 | -2.011129 | -0.740330 |
| O  | -2.146104 | -3.166945 | -0.695224 |
| N  | 1.821083  | -0.261354 | -0.550387 |
| O  | 1.782589  | 1.875809  | -1.160114 |
| C  | 2.002351  | 2.966872  | -2.102535 |
| C  | 1.948397  | 2.402847  | -3.516526 |
| C  | 0.822492  | 3.894337  | -1.854968 |
| C  | 3.323904  | 3.658862  | -1.791846 |

|   |           |           |           |
|---|-----------|-----------|-----------|
| C | 2.505313  | 0.776197  | -1.178276 |
| O | 3.633538  | 0.648989  | -1.624856 |
| C | -1.639362 | 3.561397  | 1.500573  |
| C | -2.065489 | 4.481732  | 0.534621  |
| C | -2.678068 | 5.677221  | 0.922074  |
| C | -2.875780 | 5.957175  | 2.274718  |
| C | -2.465269 | 5.036219  | 3.243966  |
| C | -1.852732 | 3.845161  | 2.856767  |
| C | 5.787410  | -1.724104 | -1.203860 |
| C | 2.121802  | -3.210802 | 1.907993  |
| C | 1.232311  | -3.729990 | 2.844691  |
| C | -0.105587 | -3.314864 | 2.828259  |
| C | -0.571296 | -2.411310 | 1.870300  |
| C | 0.288561  | -1.880896 | 0.890843  |
| C | 1.627367  | -2.290387 | 0.983046  |
| H | -3.419011 | 2.110585  | 0.298092  |
| H | -3.790683 | 0.284580  | -1.316302 |
| H | 7.498194  | -0.730637 | 0.652142  |
| H | 4.524437  | 0.450742  | 3.555917  |
| H | 6.944895  | 0.295786  | 2.865609  |
| H | -5.038894 | 0.233777  | 0.835138  |
| H | -4.276792 | 0.911019  | 2.311946  |
| H | -3.701096 | -0.637201 | 1.647953  |
| H | -0.125564 | 2.036703  | 1.710634  |
| H | -0.664822 | 2.301993  | 0.047809  |
| H | -7.092589 | -3.408476 | -0.628123 |
| H | -6.491715 | -1.808451 | -0.100765 |
| H | -6.481847 | -2.238555 | -1.833921 |
| H | -5.455849 | -5.095415 | -1.559021 |
| H | -3.704351 | -4.755587 | -1.578048 |
| H | -4.797239 | -3.902255 | -2.707463 |
| H | -4.842008 | -2.835335 | 1.465157  |
| H | -5.444769 | -4.452840 | 1.020989  |
| H | -3.702962 | -4.098832 | 0.897834  |
| H | 1.962727  | 3.229427  | -4.241871 |
| H | 2.806322  | 1.746030  | -3.716327 |
| H | 1.011413  | 1.838072  | -3.633421 |
| H | 0.906707  | 4.779871  | -2.502309 |
| H | 0.813083  | 4.229756  | -0.806027 |
| H | -0.123122 | 3.375738  | -2.078122 |
| H | 3.334311  | 4.004035  | -0.746884 |
| H | 4.171011  | 2.981140  | -1.955637 |
| H | 3.434385  | 4.537414  | -2.444883 |
| H | -1.934850 | 4.236210  | -0.523708 |
| H | -3.007796 | 6.388580  | 0.161394  |

|   |           |           |           |
|---|-----------|-----------|-----------|
| H | -3.353471 | 6.892247  | 2.576909  |
| H | -2.621307 | 5.252036  | 4.303739  |
| H | -1.530173 | 3.119598  | 3.609270  |
| H | 6.865118  | -1.624033 | -1.389410 |
| H | 5.500156  | -2.780670 | -1.284073 |
| H | 5.226607  | -1.182544 | -1.977968 |
| H | 3.177426  | -3.495375 | 1.909270  |
| H | 1.579827  | -4.443778 | 3.593717  |
| H | -0.796529 | -3.703200 | 3.580614  |
| H | -1.620119 | -2.097364 | 1.884446  |
| H | -1.192963 | -2.975335 | -0.550378 |

### Int-2\_Pyr\_R\_cis

Imaginary frequencies = 0

E(MN15,DCE) = -2573.173279

E<sub>Thermal correction</sub> = 0.607921

|    |           |           |           |
|----|-----------|-----------|-----------|
| Pd | -1.017651 | -0.546091 | -0.874483 |
| C  | 1.556632  | -1.538322 | -1.376797 |
| O  | 2.403850  | -2.245814 | -1.900857 |
| C  | 2.890609  | 0.227242  | -0.099484 |
| C  | 1.826551  | -0.028553 | -1.219829 |
| N  | 0.576949  | 0.681816  | -0.890863 |
| N  | -2.454774 | -2.009299 | -0.827809 |
| C  | -3.585705 | -1.929651 | -0.114197 |
| C  | -4.528579 | -2.960874 | -0.027138 |
| C  | -4.215860 | -4.114767 | -0.766936 |
| C  | -2.167680 | -3.124119 | -1.512426 |
| C  | -3.044374 | -4.205738 | -1.506662 |
| S  | -3.755710 | -0.382070 | 0.806625  |
| O  | -5.097106 | -0.289781 | 1.377677  |
| O  | 0.442465  | -1.962072 | -0.872330 |
| C  | 2.875643  | -0.856421 | 0.971221  |
| O  | 4.161224  | 0.552146  | -0.610189 |
| C  | 4.860633  | -0.423637 | -1.357061 |
| O  | 1.667413  | 2.589256  | -1.337561 |
| C  | 2.135932  | 3.943136  | -1.055505 |
| C  | 3.525528  | 3.933065  | -1.677050 |
| C  | 2.226245  | 4.178651  | 0.446581  |
| C  | 1.216241  | 4.943603  | -1.740949 |
| C  | 0.625818  | 1.981713  | -0.816615 |
| O  | -0.296007 | 2.731393  | -0.277695 |
| N  | -2.571697 | -0.516856 | 1.810030  |

|   |           |           |           |
|---|-----------|-----------|-----------|
| O | -0.878686 | 0.122952  | 3.067305  |
| C | -0.016800 | 1.052454  | 3.771644  |
| C | 0.850616  | 1.867295  | 2.816539  |
| C | 0.856513  | 0.133611  | 4.614994  |
| C | -0.884628 | 1.950609  | 4.644435  |
| C | -1.736135 | 0.508508  | 2.132319  |
| O | -1.738243 | 1.643782  | 1.644833  |
| C | 5.589669  | -1.433336 | -0.499531 |
| C | 5.480770  | -2.802823 | -0.763109 |
| C | 6.169570  | -3.728547 | 0.025318  |
| C | 6.961303  | -3.292892 | 1.089189  |
| C | 7.061156  | -1.925794 | 1.365801  |
| C | 6.378513  | -1.002288 | 0.574751  |
| C | -5.790202 | -2.921742 | 0.790767  |
| C | -4.673069 | 1.691275  | -0.681677 |
| C | -4.572881 | 2.602762  | -1.728764 |
| C | -3.420840 | 2.614011  | -2.525768 |
| C | -2.362681 | 1.735954  | -2.280851 |
| C | -2.421285 | 0.808023  | -1.226691 |
| C | -3.594301 | 0.828047  | -0.472210 |
| H | 2.578009  | 1.164317  | 0.384615  |
| H | 2.250496  | 0.356431  | -2.160914 |
| H | -4.913607 | -4.955589 | -0.738086 |
| H | -1.205079 | -3.135517 | -2.027117 |
| H | -2.796263 | -5.106881 | -2.068047 |
| H | 3.548822  | -0.587725 | 1.798767  |
| H | 1.845719  | -0.963232 | 1.352236  |
| H | 3.183131  | -1.832541 | 0.572124  |
| H | 5.594788  | 0.140605  | -1.954843 |
| H | 4.185562  | -0.953021 | -2.048389 |
| H | 4.028574  | 4.894380  | -1.500236 |
| H | 3.454243  | 3.763844  | -2.761156 |
| H | 4.115100  | 3.114575  | -1.237941 |
| H | 2.753258  | 5.127197  | 0.624816  |
| H | 1.234389  | 4.242175  | 0.910514  |
| H | 2.804311  | 3.374092  | 0.927708  |
| H | 1.144523  | 4.717662  | -2.814951 |
| H | 1.630132  | 5.956523  | -1.628411 |
| H | 0.210558  | 4.922144  | -1.301064 |
| H | 1.722957  | 2.258928  | 3.362034  |
| H | 0.297043  | 2.706233  | 2.380706  |
| H | 1.214927  | 1.220387  | 2.004490  |
| H | 1.510018  | 0.728425  | 5.269211  |
| H | 0.229284  | -0.522479 | 5.234489  |
| H | 1.483022  | -0.494074 | 3.963767  |

|   |           |           |           |
|---|-----------|-----------|-----------|
| H | -1.478443 | 1.346524  | 5.345935  |
| H | -1.561264 | 2.550065  | 4.019112  |
| H | -0.247210 | 2.634814  | 5.223739  |
| H | 4.819462  | -3.134789 | -1.567966 |
| H | 6.075764  | -4.796661 | -0.184670 |
| H | 7.495612  | -4.017378 | 1.708359  |
| H | 7.674995  | -1.581202 | 2.201744  |
| H | 6.439472  | 0.068292  | 0.789551  |
| H | -6.301212 | -3.890801 | 0.717665  |
| H | -6.466915 | -2.128665 | 0.447332  |
| H | -5.578586 | -2.703611 | 1.845222  |
| H | -5.550159 | 1.635779  | -0.034238 |
| H | -5.388930 | 3.299831  | -1.928413 |
| H | -3.348063 | 3.323895  | -3.353599 |
| H | -1.472753 | 1.775373  | -2.916447 |
| H | -0.922549 | 2.227746  | 0.327733  |

### Int-2\_Pyr\_R\_trans

Imaginary frequencies = 0

E(MN15,DCE) = -2573.180328

E<sub>Thermal correction</sub> = 0.601486

|    |           |           |           |
|----|-----------|-----------|-----------|
| Pd | 0.608865  | -0.484375 | -0.489126 |
| C  | 3.025035  | -0.088202 | -1.862190 |
| O  | 4.121572  | -0.312653 | -2.348754 |
| C  | 3.818913  | 0.940539  | 0.305310  |
| C  | 2.898870  | 1.130837  | -0.910198 |
| N  | 1.508878  | 1.282391  | -0.509430 |
| N  | -0.400805 | -2.237031 | -0.818314 |
| C  | -1.741446 | -2.333171 | -0.790202 |
| C  | -2.435134 | -3.493431 | -1.176077 |
| C  | -1.613953 | -4.566977 | -1.570368 |
| C  | 0.355552  | -3.264786 | -1.220133 |
| C  | -0.230161 | -4.468177 | -1.598231 |
| S  | -2.506390 | -0.766818 | -0.281329 |
| O  | -2.079135 | 0.274128  | -1.236966 |
| O  | 1.956480  | -0.804559 | -2.016001 |
| C  | 3.860430  | 2.169538  | 1.192301  |
| O  | 3.374649  | -0.133610 | 1.111978  |
| C  | 3.857250  | -1.427431 | 0.804429  |
| O  | 1.538756  | 3.532042  | -0.675356 |
| C  | 0.960940  | 4.849613  | -0.931030 |
| C  | 2.197970  | 5.721937  | -1.093065 |

|   |           |           |           |
|---|-----------|-----------|-----------|
| C | 0.147411  | 4.825555  | -2.218651 |
| C | 0.142427  | 5.300114  | 0.272326  |
| C | 0.870314  | 2.406053  | -0.548602 |
| O | -0.436279 | 2.492767  | -0.456116 |
| N | -4.010750 | -1.122448 | -0.146866 |
| O | -6.118284 | -0.505371 | 0.177330  |
| C | -7.212176 | 0.366763  | 0.552071  |
| C | -7.310600 | 1.540832  | -0.416495 |
| C | -8.433387 | -0.533897 | 0.422348  |
| C | -7.044350 | 0.830108  | 1.996060  |
| C | -4.854522 | -0.076280 | 0.186662  |
| O | -4.505772 | 1.057161  | 0.463596  |
| C | 5.358754  | -1.533752 | 0.926115  |
| C | 6.155130  | -1.771170 | -0.199516 |
| C | 7.545310  | -1.847334 | -0.072608 |
| C | 8.146168  | -1.674540 | 1.174804  |
| C | 7.355835  | -1.417891 | 2.299964  |
| C | 5.969429  | -1.346239 | 2.173979  |
| C | -3.924946 | -3.695934 | -1.222366 |
| C | -2.494315 | -0.408039 | 2.457793  |
| C | -1.823349 | -0.072519 | 3.628883  |
| C | -0.448970 | 0.207494  | 3.591256  |
| C | 0.273548  | 0.147332  | 2.398061  |
| C | -0.376519 | -0.190851 | 1.198181  |
| C | -1.746886 | -0.437790 | 1.275666  |
| H | 4.821955  | 0.722522  | -0.104457 |
| H | 3.249635  | 2.018641  | -1.460147 |
| H | -2.099042 | -5.497520 | -1.875279 |
| H | 1.431373  | -3.079962 | -1.262778 |
| H | 0.393341  | -5.302533 | -1.920342 |
| H | 4.166209  | 3.059915  | 0.624271  |
| H | 4.563386  | 2.006123  | 2.021143  |
| H | 2.859723  | 2.353617  | 1.615675  |
| H | 3.368067  | -2.092214 | 1.533848  |
| H | 3.541642  | -1.751872 | -0.202698 |
| H | 1.901723  | 6.763881  | -1.279077 |
| H | 2.810340  | 5.684841  | -0.180396 |
| H | 2.806466  | 5.370003  | -1.938351 |
| H | -0.150309 | 5.853143  | -2.473483 |
| H | -0.759535 | 4.217291  | -2.114818 |
| H | 0.755868  | 4.429989  | -3.045474 |
| H | 0.749195  | 5.233077  | 1.187514  |
| H | -0.154047 | 6.350023  | 0.132378  |
| H | -0.762679 | 4.693505  | 0.396083  |
| H | -8.217952 | 2.122358  | -0.194831 |

|   |           |           |           |
|---|-----------|-----------|-----------|
| H | -6.435112 | 2.195525  | -0.329118 |
| H | -7.382036 | 1.170663  | -1.450278 |
| H | -9.345017 | 0.022980  | 0.682770  |
| H | -8.341673 | -1.399319 | 1.094489  |
| H | -8.525467 | -0.902541 | -0.609409 |
| H | -6.918024 | -0.041040 | 2.657521  |
| H | -6.174981 | 1.491157  | 2.098434  |
| H | -7.946201 | 1.374134  | 2.313923  |
| H | 5.675364  | -1.861459 | -1.178231 |
| H | 8.160868  | -2.031690 | -0.956022 |
| H | 9.232805  | -1.733084 | 1.272413  |
| H | 7.824583  | -1.277062 | 3.276848  |
| H | 5.343788  | -1.142807 | 3.048145  |
| H | -4.135719 | -4.701376 | -1.611011 |
| H | -4.379341 | -3.580249 | -0.230943 |
| H | -4.415973 | -2.948725 | -1.856866 |
| H | -3.563046 | -0.629410 | 2.454051  |
| H | -2.368052 | -0.025132 | 4.573743  |
| H | 0.067591  | 0.468050  | 4.518684  |
| H | 1.351573  | 0.333481  | 2.381640  |
| H | -0.895471 | 1.623971  | -0.602812 |

### Int-2\_Pyr\_S\_cis

Imaginary frequencies = 0

E(MN15,DCE) = -2573.163713

E<sub>Thermal correction</sub> = 0.602274

|    |           |           |           |
|----|-----------|-----------|-----------|
| Pd | 0.176787  | -0.104581 | -1.566213 |
| C  | 2.914454  | -0.889279 | -1.482156 |
| O  | 3.968338  | -1.454175 | -1.726662 |
| C  | 3.144569  | 0.328715  | 0.754883  |
| C  | 2.919109  | 0.480082  | -0.789317 |
| N  | 1.642424  | 1.178903  | -1.022327 |
| N  | -1.073629 | -1.695783 | -1.932737 |
| C  | -2.181262 | -1.961586 | -1.218420 |
| C  | -2.925153 | -3.144124 | -1.364569 |
| C  | -2.441661 | -4.027864 | -2.347625 |
| C  | -0.622622 | -2.562964 | -2.846601 |
| C  | -1.302739 | -3.751728 | -3.089916 |
| S  | -2.493968 | -0.650672 | -0.007456 |
| O  | -1.325230 | -0.564543 | 0.865550  |
| O  | 1.736959  | -1.384261 | -1.695851 |
| C  | 2.658865  | -1.007478 | 1.299860  |

|   |           |           |           |
|---|-----------|-----------|-----------|
| O | 4.450276  | 0.693585  | 1.139306  |
| C | 5.528487  | -0.077143 | 0.646151  |
| O | 2.710943  | 3.049840  | -0.370622 |
| C | 2.853271  | 4.206016  | 0.516975  |
| C | 4.361119  | 4.281422  | 0.705228  |
| C | 2.164331  | 3.917397  | 1.843865  |
| C | 2.311399  | 5.453475  | -0.166596 |
| C | 1.598637  | 2.423594  | -0.665459 |
| O | 0.485529  | 3.122102  | -0.595889 |
| N | -3.888647 | -1.017362 | 0.574400  |
| O | -5.492842 | -0.660376 | 2.069604  |
| C | -6.243849 | 0.062331  | 3.074966  |
| C | -5.396677 | 0.263586  | 4.327178  |
| C | -7.413982 | -0.867333 | 3.368189  |
| C | -6.746516 | 1.386252  | 2.507002  |
| C | -4.377440 | -0.154517 | 1.539006  |
| O | -3.884627 | 0.916962  | 1.846494  |
| C | 5.769842  | -1.353867 | 1.419435  |
| C | 5.928120  | -2.571365 | 0.748996  |
| C | 6.166260  | -3.745436 | 1.468655  |
| C | 6.235197  | -3.712245 | 2.862349  |
| C | 6.062614  | -2.499821 | 3.537552  |
| C | 5.831681  | -1.327618 | 2.818524  |
| C | -4.144562 | -3.552662 | -0.584733 |
| C | -3.820531 | 1.396287  | -1.288787 |
| C | -3.866481 | 2.459461  | -2.188008 |
| C | -2.706644 | 2.839221  | -2.871201 |
| C | -1.497904 | 2.169446  | -2.659285 |
| C | -1.406946 | 1.101718  | -1.744950 |
| C | -2.593095 | 0.762348  | -1.083885 |
| H | 2.516952  | 1.107307  | 1.215144  |
| H | 3.754820  | 1.077703  | -1.182041 |
| H | -2.984170 | -4.962647 | -2.509534 |
| H | 0.311060  | -2.297098 | -3.344284 |
| H | -0.929458 | -4.449508 | -3.839830 |
| H | 2.826318  | -1.048871 | 2.385421  |
| H | 1.579811  | -1.104826 | 1.098037  |
| H | 3.179364  | -1.857242 | 0.836106  |
| H | 6.414257  | 0.572767  | 0.734407  |
| H | 5.387833  | -0.320387 | -0.420062 |
| H | 4.612406  | 5.076105  | 1.422060  |
| H | 4.855924  | 4.498100  | -0.252546 |
| H | 4.724395  | 3.313362  | 1.080145  |
| H | 2.306413  | 4.776242  | 2.515650  |
| H | 1.084870  | 3.758389  | 1.716795  |

|   |           |           |           |
|---|-----------|-----------|-----------|
| H | 2.613712  | 3.033548  | 2.320893  |
| H | 2.762816  | 5.563813  | -1.163418 |
| H | 2.580446  | 6.336206  | 0.431954  |
| H | 1.219643  | 5.417947  | -0.268840 |
| H | -6.018953 | 0.699188  | 5.123186  |
| H | -4.551763 | 0.933111  | 4.125828  |
| H | -5.012063 | -0.704834 | 4.680702  |
| H | -8.068825 | -0.424050 | 4.132193  |
| H | -8.000942 | -1.040995 | 2.454654  |
| H | -7.046076 | -1.836290 | 3.735069  |
| H | -7.303529 | 1.207353  | 1.574201  |
| H | -5.912045 | 2.068986  | 2.305263  |
| H | -7.429023 | 1.859370  | 3.228615  |
| H | 5.824117  | -2.592517 | -0.339364 |
| H | 6.285091  | -4.692936 | 0.937693  |
| H | 6.416300  | -4.631163 | 3.424989  |
| H | 6.109000  | -2.471100 | 4.629002  |
| H | 5.682515  | -0.376339 | 3.337015  |
| H | -4.453252 | -4.556914 | -0.905135 |
| H | -4.971865 | -2.847511 | -0.730766 |
| H | -3.952133 | -3.555977 | 0.494620  |
| H | -4.714353 | 1.066709  | -0.757171 |
| H | -4.806183 | 2.987336  | -2.360617 |
| H | -2.746877 | 3.664008  | -3.586845 |
| H | -0.607883 | 2.482072  | -3.213934 |
| H | -0.282512 | 2.533724  | -0.774746 |

### Int-2\_Pyr\_S\_trans

Imaginary frequencies = 0

E(MN15,DCE) = -2573.154389

E<sub>Thermal correction</sub> = 0.599563

|    |           |           |           |
|----|-----------|-----------|-----------|
| Pd | -0.123873 | -0.540648 | 0.130092  |
| C  | 1.801042  | 0.186498  | -1.789190 |
| O  | 2.682307  | 0.099443  | -2.628611 |
| C  | 3.249174  | 0.684989  | 0.218559  |
| C  | 2.030687  | 1.148337  | -0.596104 |
| N  | 0.828509  | 1.196152  | 0.219226  |
| N  | -1.301145 | -2.172346 | -0.242644 |
| C  | -2.588837 | -2.212703 | 0.124344  |
| C  | -3.494356 | -3.185743 | -0.319776 |
| C  | -2.942492 | -4.172589 | -1.152279 |
| C  | -0.801312 | -3.108805 | -1.061620 |

|   |           |           |           |
|---|-----------|-----------|-----------|
| C | -1.602835 | -4.146355 | -1.524170 |
| S | -3.102862 | -0.840964 | 1.221992  |
| O | -4.420525 | -1.128014 | 1.777192  |
| O | 0.697075  | -0.495268 | -1.766186 |
| C | 3.619474  | 1.671571  | 1.308377  |
| O | 2.991938  | -0.552992 | 0.854000  |
| C | 3.290253  | -1.732655 | 0.132502  |
| O | 0.978429  | 3.419139  | 0.562773  |
| C | 0.415735  | 4.763457  | 0.632846  |
| C | 1.631017  | 5.643635  | 0.374929  |
| C | -0.618686 | 4.936300  | -0.471141 |
| C | -0.150655 | 5.038238  | 2.020902  |
| C | 0.281785  | 2.299577  | 0.621227  |
| O | -0.922062 | 2.371028  | 1.121558  |
| N | -2.829698 | 0.505653  | 0.443908  |
| O | -2.527443 | 1.434414  | -1.547597 |
| C | -2.509383 | 1.474683  | -3.004945 |
| C | -3.873126 | 1.925518  | -3.511165 |
| C | -1.434526 | 2.511788  | -3.295022 |
| C | -2.095850 | 0.121609  | -3.577467 |
| C | -3.196525 | 0.492344  | -0.891605 |
| O | -3.980880 | -0.299415 | -1.389093 |
| C | 4.750904  | -1.838494 | -0.236694 |
| C | 5.153404  | -1.825748 | -1.576406 |
| C | 6.510203  | -1.905957 | -1.903340 |
| C | 7.470680  | -1.986031 | -0.894426 |
| C | 7.074908  | -1.979685 | 0.447122  |
| C | 5.721507  | -1.904420 | 0.772743  |
| C | -4.967325 | -3.184465 | -0.033601 |
| C | -2.285686 | -0.986654 | 3.804949  |
| C | -1.296629 | -0.919849 | 4.782175  |
| C | 0.037441  | -0.704077 | 4.406361  |
| C | 0.406642  | -0.557363 | 3.066252  |
| C | -0.566985 | -0.619156 | 2.054923  |
| C | -1.880194 | -0.822466 | 2.477820  |
| H | 4.076767  | 0.577650  | -0.506117 |
| H | 2.265096  | 2.141268  | -1.012668 |
| H | -3.600505 | -4.958694 | -1.531121 |
| H | 0.241767  | -2.978817 | -1.358249 |
| H | -1.183014 | -4.904658 | -2.185588 |
| H | 3.805106  | 2.672339  | 0.892865  |
| H | 4.518261  | 1.322052  | 1.835578  |
| H | 2.794450  | 1.745472  | 2.035048  |
| H | 3.006908  | -2.556144 | 0.806888  |
| H | 2.670866  | -1.821933 | -0.777349 |

|   |           |           |           |   |           |           |           |
|---|-----------|-----------|-----------|---|-----------|-----------|-----------|
| H | 1.336945  | 6.702770  | 0.379192  | N | -3.337907 | -3.001901 | 0.374754  |
| H | 2.389216  | 5.483683  | 1.155318  | C | -4.016455 | -1.863165 | 0.354531  |
| H | 2.076223  | 5.403033  | -0.601130 | C | -5.410457 | -1.728530 | 0.236898  |
| H | -1.008706 | 5.964397  | -0.449769 | C | -6.079732 | -2.962280 | 0.120300  |
| H | -1.459604 | 4.239909  | -0.348194 | C | -3.999174 | -4.146985 | 0.266519  |
| H | -0.152586 | 4.763239  | -1.452655 | C | -5.391131 | -4.169006 | 0.127512  |
| H | 0.593240  | 4.777601  | 2.788227  | S | -2.887775 | -0.464169 | 0.387313  |
| H | -0.373338 | 6.111888  | 2.109415  | O | -1.904145 | -0.740953 | -0.713480 |
| H | -1.068919 | 4.469764  | 2.206401  | O | 0.721143  | -0.153764 | -2.022777 |
| H | -3.838507 | 2.044985  | -4.604229 | C | 4.115136  | -0.051599 | 1.223580  |
| H | -4.640895 | 1.181529  | -3.260988 | O | 2.447477  | -1.552214 | 0.504094  |
| H | -4.147498 | 2.892969  | -3.064412 | C | 2.165921  | -2.676172 | -0.309416 |
| H | -1.285111 | 2.613059  | -4.379244 | O | 2.938859  | 2.876157  | 0.468673  |
| H | -0.485777 | 2.192536  | -2.834090 | C | 3.307701  | 4.078928  | 1.176533  |
| H | -1.724666 | 3.489529  | -2.884133 | C | 4.763246  | 4.283842  | 0.776385  |
| H | -1.168984 | -0.224849 | -3.093145 | C | 2.453966  | 5.253835  | 0.709818  |
| H | -2.887270 | -0.627080 | -3.450155 | C | 3.199603  | 3.851724  | 2.681714  |
| H | -1.895644 | 0.242239  | -4.652682 | C | 1.720221  | 2.314936  | 0.600750  |
| H | 4.394663  | -1.718230 | -2.356603 | O | 0.795526  | 2.833712  | 1.229950  |
| H | 6.816948  | -1.894027 | -2.951694 | N | -3.618677 | 0.866486  | 0.387022  |
| H | 8.530999  | -2.046959 | -1.150767 | O | -2.346980 | 2.233368  | -0.881750 |
| H | 7.825688  | -2.036848 | 1.238902  | C | -1.981593 | 3.001191  | -2.075129 |
| H | 5.403085  | -1.895175 | 1.819393  | C | -2.830604 | 4.263848  | -2.169039 |
| H | -5.450805 | -3.992457 | -0.598273 | C | -0.521238 | 3.367004  | -1.849038 |
| H | -5.178111 | -3.309665 | 1.035852  | C | -2.125445 | 2.089754  | -3.286838 |
| H | -5.396991 | -2.218604 | -0.332668 | C | -3.570497 | 1.735690  | -0.716664 |
| H | -3.340081 | -1.144035 | 4.041993  | O | -4.541972 | 2.000153  | -1.384216 |
| H | -1.560516 | -1.030972 | 5.835605  | C | 3.397796  | -3.488677 | -0.630242 |
| H | 0.807038  | -0.654125 | 5.181047  | C | 3.826323  | -3.647772 | -1.952233 |
| H | 1.453311  | -0.409063 | 2.783940  | C | 4.978158  | -4.387961 | -2.234587 |
| H | -1.526209 | 1.590779  | 0.895931  | C | 5.714664  | -4.961033 | -1.197246 |
|   |           |           |           | C | 5.301949  | -4.788709 | 0.128126  |
|   |           |           |           | C | 4.150407  | -4.054762 | 0.408348  |
|   |           |           |           | C | -6.203413 | -0.451654 | 0.231014  |
|   |           |           |           | C | -2.026567 | -1.584105 | 2.836359  |
|   |           |           |           | C | -1.074573 | -1.606830 | 3.862643  |
|   |           |           |           | C | -0.037126 | -0.673803 | 3.897858  |
|   |           |           |           | C | 0.052496  | 0.322303  | 2.921486  |
|   |           |           |           | C | -0.903425 | 0.379325  | 1.905569  |
|   |           |           |           | C | -1.920142 | -0.590416 | 1.873092  |
|   |           |           |           | H | 4.097544  | -1.100476 | -0.672069 |
|   |           |           |           | H | 3.430046  | 1.222505  | -1.120753 |
|   |           |           |           | H | -7.167858 | -2.952638 | 0.017903  |
|   |           |           |           | H | -3.411123 | -5.068723 | 0.286633  |
|   |           |           |           | H | -5.922340 | -5.117112 | 0.029238  |

### int-2\_SO-R

Imaginary frequencies = 0

E(MN15,DCE) = -2573.163493

E<sub>Thermal correction</sub> = 0.603373

|    |           |           |           |
|----|-----------|-----------|-----------|
| Pd | -0.066576 | 0.255464  | -0.275784 |
| C  | 2.039145  | -0.132637 | -2.033087 |
| O  | 2.711661  | -0.619783 | -2.917145 |
| C  | 3.385725  | -0.609711 | 0.017542  |
| C  | 2.675529  | 0.492532  | -0.789883 |
| N  | 1.634486  | 1.124864  | -0.013794 |

|   |           |           |           |   |           |           |           |
|---|-----------|-----------|-----------|---|-----------|-----------|-----------|
| H | 4.832726  | 0.728687  | 0.931492  | C | 2.305312  | -0.765542 | -2.090994 |
| H | 4.644033  | -0.861462 | 1.746009  | O | 2.890842  | -1.489654 | -2.866763 |
| H | 3.381498  | 0.391294  | 1.917118  | C | 3.730099  | -0.773135 | -0.065645 |
| H | 1.455631  | -3.279656 | 0.276911  | C | 3.050530  | 0.136357  | -1.106191 |
| H | 1.653089  | -2.392061 | -1.243755 | N | 2.090635  | 1.024953  | -0.491782 |
| H | 5.168726  | 5.185498  | 1.257799  | N | -3.186899 | 2.375579  | 0.525232  |
| H | 5.366852  | 3.416352  | 1.083138  | C | -2.805667 | 1.468543  | -0.357151 |
| H | 4.845269  | 4.396638  | -0.314324 | C | -2.658103 | 1.647369  | -1.741905 |
| H | 2.845000  | 6.189112  | 1.138269  | C | -2.936949 | 2.960651  | -2.159097 |
| H | 1.410081  | 5.122375  | 1.019779  | C | -3.447444 | 3.606409  | 0.096323  |
| H | 2.494750  | 5.331534  | -0.387483 | C | -3.324953 | 3.943627  | -1.254276 |
| H | 3.758942  | 2.944289  | 2.960821  | S | -2.481664 | -0.103988 | 0.472833  |
| H | 3.636995  | 4.705976  | 3.219842  | O | -1.499857 | -0.859799 | -0.381721 |
| H | 2.150698  | 3.739007  | 2.983707  | O | 0.992338  | -0.753987 | -1.956274 |
| H | -2.454643 | 4.882071  | -2.997517 | C | 4.513925  | 0.011557  | 0.966907  |
| H | -3.886019 | 4.029695  | -2.348745 | O | 2.752318  | -1.524561 | 0.632299  |
| H | -2.741723 | 4.846999  | -1.240039 | C | 2.465672  | -2.832074 | 0.163259  |
| H | -0.185605 | 4.031240  | -2.658940 | O | 3.540564  | 2.726617  | -0.475802 |
| H | 0.113254  | 2.467677  | -1.854165 | C | 4.049492  | 3.999151  | -0.019179 |
| H | -0.396189 | 3.879426  | -0.884118 | C | 5.512584  | 3.960899  | -0.441348 |
| H | -1.527348 | 1.176605  | -3.134385 | C | 3.321632  | 5.144781  | -0.714050 |
| H | -3.176460 | 1.820977  | -3.459284 | C | 3.940067  | 4.088576  | 1.500656  |
| H | -1.745213 | 2.605817  | -4.180567 | C | 2.286258  | 2.320372  | -0.196740 |
| H | 3.264474  | -3.159626 | -2.753468 | O | 1.424874  | 3.055931  | 0.289543  |
| H | 5.306682  | -4.506315 | -3.269669 | N | -3.732331 | -0.832576 | 1.003829  |
| H | 6.616296  | -5.537114 | -1.418391 | O | -5.760196 | -1.672461 | 0.660770  |
| H | 5.880820  | -5.231052 | 0.942551  | C | -6.960252 | -2.032528 | -0.075209 |
| H | 3.822793  | -3.909363 | 1.442152  | C | -6.613172 | -2.997322 | -1.203411 |
| H | -7.272813 | -0.691871 | 0.161127  | C | -7.813868 | -2.725448 | 0.977682  |
| H | -6.025778 | 0.134207  | 1.142826  | C | -7.656157 | -0.776399 | -0.587619 |
| H | -5.927238 | 0.210296  | -0.602396 | C | -4.747881 | -1.046589 | 0.082167  |
| H | -2.813105 | -2.336781 | 2.787723  | O | -4.708522 | -0.692991 | -1.085583 |
| H | -1.140775 | -2.376603 | 4.634106  | C | 3.693933  | -3.705487 | 0.079770  |
| H | 0.707063  | -0.720933 | 4.694842  | C | 4.138449  | -4.193721 | -1.153639 |
| H | 0.841195  | 1.076989  | 2.929167  | C | 5.289765  | -4.983292 | -1.225182 |
| H | -0.919671 | 1.287713  | 1.244258  | C | 6.009734  | -5.277687 | -0.066673 |

**int-2\_SO-S**

Imaginary frequencies = 0

E(MN15,DCE) = -2573.166767

E<sub>Thermal correction</sub> = 0.600628

Pd 0.358568 0.185830 -0.367552

|   |           |           |           |
|---|-----------|-----------|-----------|
| C | 2.305312  | -0.765542 | -2.090994 |
| O | 2.890842  | -1.489654 | -2.866763 |
| C | 3.730099  | -0.773135 | -0.065645 |
| C | 3.050530  | 0.136357  | -1.106191 |
| N | 2.090635  | 1.024953  | -0.491782 |
| N | -3.186899 | 2.375579  | 0.525232  |
| C | -2.805667 | 1.468543  | -0.357151 |
| C | -2.658103 | 1.647369  | -1.741905 |
| C | -2.936949 | 2.960651  | -2.159097 |
| C | -3.447444 | 3.606409  | 0.096323  |
| C | -3.324953 | 3.943627  | -1.254276 |
| S | -2.481664 | -0.103988 | 0.472833  |
| O | -1.499857 | -0.859799 | -0.381721 |
| O | 0.992338  | -0.753987 | -1.956274 |
| C | 4.513925  | 0.011557  | 0.966907  |
| O | 2.752318  | -1.524561 | 0.632299  |
| C | 2.465672  | -2.832074 | 0.163259  |
| O | 3.540564  | 2.726617  | -0.475802 |
| C | 4.049492  | 3.999151  | -0.019179 |
| C | 5.512584  | 3.960899  | -0.441348 |
| C | 3.321632  | 5.144781  | -0.714050 |
| C | 3.940067  | 4.088576  | 1.500656  |
| C | 2.286258  | 2.320372  | -0.196740 |
| O | 1.424874  | 3.055931  | 0.289543  |
| N | -3.732331 | -0.832576 | 1.003829  |
| O | -5.760196 | -1.672461 | 0.660770  |
| C | -6.960252 | -2.032528 | -0.075209 |
| C | -6.613172 | -2.997322 | -1.203411 |
| C | -7.813868 | -2.725448 | 0.977682  |
| C | -7.656157 | -0.776399 | -0.587619 |
| C | -4.747881 | -1.046589 | 0.082167  |
| O | -4.708522 | -0.692991 | -1.085583 |
| C | 3.693933  | -3.705487 | 0.079770  |
| C | 4.138449  | -4.193721 | -1.153639 |
| C | 5.289765  | -4.983292 | -1.225182 |
| C | 6.009734  | -5.277687 | -0.066673 |
| C | 5.580717  | -4.776879 | 1.166863  |
| C | 4.429523  | -3.993716 | 1.237789  |
| C | -2.273945 | 0.592540  | -2.736214 |
| C | -1.885047 | -0.153582 | 3.159640  |
| C | -0.975126 | 0.057935  | 4.202240  |
| C | 0.228140  | 0.730484  | 3.976244  |
| C | 0.538434  | 1.224243  | 2.705470  |
| C | -0.360557 | 1.029491  | 1.656465  |
| C | -1.556368 | 0.342298  | 1.906917  |

|   |           |           |           |
|---|-----------|-----------|-----------|
| H | 4.400905  | -1.449101 | -0.626680 |
| H | 3.825806  | 0.695895  | -1.650618 |
| H | -2.847305 | 3.196927  | -3.222429 |
| H | -3.756634 | 4.342077  | 0.843763  |
| H | -3.534556 | 4.960462  | -1.590005 |
| H | 5.260754  | 0.663940  | 0.491758  |
| H | 5.015776  | -0.682030 | 1.656679  |
| H | 3.818815  | 0.639916  | 1.547555  |
| H | 1.754572  | -3.245207 | 0.894712  |
| H | 1.954697  | -2.813820 | -0.813614 |
| H | 6.015951  | 4.896642  | -0.158148 |
| H | 6.028377  | 3.120125  | 0.046486  |
| H | 5.590107  | 3.832315  | -1.530588 |
| H | 3.793013  | 6.101143  | -0.441326 |
| H | 2.265210  | 5.164081  | -0.420431 |
| H | 3.389543  | 5.024552  | -1.805688 |
| H | 4.395749  | 3.195775  | 1.958463  |
| H | 4.482368  | 4.975409  | 1.861075  |
| H | 2.890266  | 4.161250  | 1.812268  |
| H | -7.541651 | -3.364748 | -1.664857 |
| H | -6.005614 | -2.505655 | -1.972856 |
| H | -6.060860 | -3.861486 | -0.805186 |
| H | -8.767295 | -3.049736 | 0.536675  |
| H | -8.022985 | -2.039096 | 1.810695  |
| H | -7.288513 | -3.605806 | 1.374498  |
| H | -7.843899 | -0.082010 | 0.245126  |
| H | -7.048477 | -0.271945 | -1.348768 |
| H | -8.624435 | -1.052658 | -1.030502 |
| H | 3.586744  | -3.923776 | -2.058783 |
| H | 5.630115  | -5.360609 | -2.192184 |
| H | 6.910524  | -5.893366 | -0.122950 |
| H | 6.145842  | -5.002433 | 2.074436  |
| H | 4.088377  | -3.594719 | 2.197807  |
| H | -2.447164 | 0.969711  | -3.752837 |
| H | -1.212690 | 0.309342  | -2.647677 |
| H | -2.870082 | -0.315281 | -2.578539 |
| H | -2.821234 | -0.697946 | 3.293574  |
| H | -1.208856 | -0.317971 | 5.200279  |
| H | 0.929302  | 0.877046  | 4.799928  |
| H | 1.457722  | 1.779046  | 2.506092  |
| H | -0.187172 | 1.659610  | 0.728963  |

**int-3-R-NBoc**

Imaginary frequencies = 0  
 E(MN15,DCE) = -2301.795904  
 E<sub>Thermal correction</sub> = 0.481799

|    |           |           |           |
|----|-----------|-----------|-----------|
| Pd | -0.686136 | 1.095086  | -0.359637 |
| C  | 2.135979  | 0.484218  | -1.016048 |
| O  | 1.952558  | 0.927055  | -2.155550 |
| N  | -1.082932 | -0.707207 | -1.648442 |
| C  | -2.611725 | 1.575076  | -0.488871 |
| C  | -3.247734 | 2.775374  | -0.829383 |
| C  | -4.644131 | 2.860343  | -0.867789 |
| C  | -5.452354 | 1.760809  | -0.563599 |
| C  | -4.854454 | 0.555211  | -0.203464 |
| C  | -3.461219 | 0.508773  | -0.175842 |
| C  | -1.922475 | -1.617806 | -1.166129 |
| C  | -2.129853 | -2.889532 | -1.704634 |
| C  | -1.402755 | -3.139472 | -2.879900 |
| C  | -0.385996 | -0.963897 | -2.759796 |
| C  | -0.542285 | -2.185466 | -3.415526 |
| S  | -2.710708 | -0.995163 | 0.338862  |
| O  | -3.699969 | -1.932808 | 0.852896  |
| O  | 1.250725  | 0.412385  | -0.086731 |
| N  | -1.516098 | -0.450171 | 1.231965  |
| O  | 0.187934  | -1.056533 | 2.549426  |
| C  | 1.162829  | -1.956709 | 3.147677  |
| C  | 1.973880  | -1.039149 | 4.050465  |
| C  | 2.049769  | -2.565547 | 2.068239  |
| C  | 0.439928  | -3.015742 | 3.972312  |
| C  | -0.676852 | -1.486992 | 1.654004  |
| O  | -0.772291 | -2.634085 | 1.241249  |
| C  | -2.979733 | -3.946487 | -1.065139 |
| C  | -0.070591 | 2.966686  | -1.128487 |
| C  | -0.225318 | 3.051424  | 0.261137  |
| H  | -2.668330 | 3.671959  | -1.063282 |
| H  | -5.110096 | 3.810955  | -1.138286 |
| H  | -6.539708 | 1.848720  | -0.592788 |
| H  | -5.433194 | -0.328440 | 0.074829  |
| H  | -1.508113 | -4.115162 | -3.361648 |
| H  | 0.318623  | -0.191368 | -3.078402 |
| H  | 0.026849  | -2.389428 | -4.323225 |
| H  | 2.719575  | -1.623254 | 4.608277  |
| H  | 1.313049  | -0.526900 | 4.765063  |
| H  | 2.497505  | -0.282761 | 3.449560  |
| H  | 2.937461  | -3.018556 | 2.533445  |
| H  | 1.514485  | -3.330609 | 1.493592  |



|   |           |           |           |   |           |           |           |
|---|-----------|-----------|-----------|---|-----------|-----------|-----------|
| H | 2.377755  | -1.771482 | 1.382554  | C | -3.741465 | -0.786117 | -0.980580 |
| H | -0.199796 | -2.538863 | 4.729993  | C | -4.888525 | -0.074677 | -1.348533 |
| H | 1.182624  | -3.640722 | 4.489832  | C | -4.940407 | 1.318808  | -1.253400 |
| H | -0.175751 | -3.658924 | 3.331007  | C | -3.836866 | 2.012327  | -0.764076 |
| H | -4.030821 | -3.638610 | -0.989204 | C | -2.706950 | 1.277049  | -0.398048 |
| H | -2.627342 | -4.121700 | -0.038547 | C | -1.278039 | 1.442919  | 1.973956  |
| H | -2.916016 | -4.878589 | -1.641716 | C | -1.267776 | 2.189858  | 3.157044  |
| H | -1.121704 | 3.459802  | 0.735819  | C | -1.098021 | 1.432005  | 4.328148  |
| H | -0.836437 | 3.321183  | -1.819342 | C | -0.958041 | -0.586748 | 3.046047  |
| C | 0.998683  | 3.016371  | 1.119772  | C | -0.943492 | 0.050631  | 4.283841  |
| O | 2.122943  | 3.200869  | 0.717112  | S | -1.366891 | 2.190191  | 0.334300  |
| O | 0.693695  | 2.781274  | 2.395678  | O | -1.767774 | 3.592410  | 0.427093  |
| C | 1.791329  | 2.714296  | 3.289513  | O | 0.919354  | -1.420338 | 0.993719  |
| H | 1.400174  | 2.351895  | 4.246325  | N | 0.066594  | 1.823313  | -0.136174 |
| H | 2.247997  | 3.707397  | 3.415343  | O | 1.696303  | 1.898960  | -1.622724 |
| H | 2.558742  | 2.029948  | 2.902916  | C | 2.364181  | 1.898372  | -2.910954 |
| H | 0.932749  | 2.824287  | -1.537031 | C | 3.834656  | 1.882167  | -2.518719 |
| C | 3.514019  | -0.058001 | -0.629185 | C | 2.006314  | 3.172103  | -3.667604 |
| H | 3.398983  | -1.144858 | -0.459281 | C | 2.015153  | 0.644417  | -3.705177 |
| C | 4.040148  | 0.565945  | 0.660195  | C | 0.377735  | 1.855085  | -1.492482 |
| N | 4.407443  | 0.131873  | -1.748576 | O | -0.427452 | 1.831922  | -2.405753 |
| H | 3.328249  | 0.377439  | 1.476408  | C | -1.393331 | 3.685647  | 3.228967  |
| H | 5.009322  | 0.110610  | 0.905119  | C | -0.696874 | -1.471064 | -2.032890 |
| H | 4.149445  | 1.653111  | 0.546410  | C | -0.504461 | -2.587233 | -1.253256 |
| H | 4.034821  | 0.698680  | -2.508355 | H | -3.728608 | -1.871362 | -1.095885 |
| C | 5.552002  | -0.588033 | -1.869495 | H | -5.755276 | -0.623876 | -1.724080 |
| O | 5.916398  | -1.389028 | -1.020478 | H | -5.837308 | 1.861837  | -1.557144 |
| C | 6.365431  | -0.318254 | -3.118792 | H | -3.827107 | 3.099135  | -0.664709 |
| H | 5.842864  | 0.312439  | -3.850362 | H | -1.075488 | 1.954434  | 5.287997  |
| H | 7.303540  | 0.174554  | -2.826389 | H | -0.805080 | -1.660752 | 2.930461  |
| H | 6.632105  | -1.279227 | -3.577981 | H | -0.801437 | -0.531390 | 5.194827  |

### Int-3-R-Pyr

Imaginary frequencies = 0

E(MN15,DCE) = -2301.806145

E<sub>Thermal correction</sub> = 0.477554

|    |           |           |           |
|----|-----------|-----------|-----------|
| Pd | -0.878932 | -0.897568 | 0.100660  |
| C  | 1.995722  | -1.140587 | 0.340999  |
| O  | 2.116311  | -1.125996 | -0.883198 |
| N  | -1.132881 | 0.118584  | 1.924738  |
| C  | -2.611654 | -0.115127 | -0.496784 |

|   |           |           |           |
|---|-----------|-----------|-----------|
| C | -3.741465 | -0.786117 | -0.980580 |
| C | -4.888525 | -0.074677 | -1.348533 |
| C | -4.940407 | 1.318808  | -1.253400 |
| C | -3.836866 | 2.012327  | -0.764076 |
| C | -2.706950 | 1.277049  | -0.398048 |
| C | -1.278039 | 1.442919  | 1.973956  |
| C | -1.267776 | 2.189858  | 3.157044  |
| C | -1.098021 | 1.432005  | 4.328148  |
| C | -0.958041 | -0.586748 | 3.046047  |
| C | -0.943492 | 0.050631  | 4.283841  |
| S | -1.366891 | 2.190191  | 0.334300  |
| O | -1.767774 | 3.592410  | 0.427093  |
| O | 0.919354  | -1.420338 | 0.993719  |
| N | 0.066594  | 1.823313  | -0.136174 |
| O | 1.696303  | 1.898960  | -1.622724 |
| C | 2.364181  | 1.898372  | -2.910954 |
| C | 3.834656  | 1.882167  | -2.518719 |
| C | 2.006314  | 3.172103  | -3.667604 |
| C | 2.015153  | 0.644417  | -3.705177 |
| C | 0.377735  | 1.855085  | -1.492482 |
| O | -0.427452 | 1.831922  | -2.405753 |
| C | -1.393331 | 3.685647  | 3.228967  |
| C | -0.696874 | -1.471064 | -2.032890 |
| C | -0.504461 | -2.587233 | -1.253256 |
| H | -3.728608 | -1.871362 | -1.095885 |
| H | -5.755276 | -0.623876 | -1.724080 |
| H | -5.837308 | 1.861837  | -1.557144 |
| H | -3.827107 | 3.099135  | -0.664709 |
| H | -1.075488 | 1.954434  | 5.287997  |
| H | -0.805080 | -1.660752 | 2.930461  |
| H | -0.801437 | -0.531390 | 5.194827  |
| H | 4.472667  | 1.837678  | -3.412783 |
| H | 4.033160  | 1.002722  | -1.889067 |
| H | 4.088120  | 2.784565  | -1.943492 |
| H | 2.599654  | 3.228120  | -4.592329 |
| H | 0.940011  | 3.182731  | -3.928609 |
| H | 2.237201  | 4.055976  | -3.054216 |
| H | 2.223244  | -0.244714 | -3.092895 |
| H | 2.641538  | 0.607331  | -4.608908 |
| H | 0.960491  | 0.652936  | -4.010333 |
| H | -2.357633 | 4.026036  | 2.829552  |
| H | -0.623141 | 4.179166  | 2.621986  |
| H | -1.296723 | 4.013520  | 4.272249  |
| H | 0.499410  | -2.852769 | -0.918038 |
| H | 0.166956  | -0.859714 | -2.303789 |

|   |           |           |           |
|---|-----------|-----------|-----------|
| C | -1.567373 | -3.616153 | -1.063088 |
| O | -2.620180 | -3.660116 | -1.658969 |
| O | -1.207703 | -4.520452 | -0.149762 |
| C | -2.142814 | -5.559901 | 0.089867  |
| H | -2.354610 | -6.109940 | -0.837970 |
| H | -3.089607 | -5.148718 | 0.468624  |
| H | -1.691723 | -6.224991 | 0.833577  |
| H | -1.646499 | -1.311332 | -2.548079 |
| C | 3.166449  | -0.720697 | 1.230268  |
| H | 3.175304  | -1.389385 | 2.105943  |
| C | 2.873430  | 0.717701  | 1.679109  |
| N | 4.390092  | -0.851173 | 0.476086  |
| H | 1.932472  | 0.754623  | 2.251336  |
| H | 3.689316  | 1.110017  | 2.304049  |
| H | 2.757062  | 1.360700  | 0.793484  |
| H | 4.270570  | -0.877068 | -0.537591 |
| C | 5.657804  | -1.037057 | 0.948781  |
| O | 6.615944  | -1.150215 | 0.204543  |
| C | 5.802791  | -1.129376 | 2.456108  |
| H | 5.322575  | -0.285756 | 2.972225  |
| H | 5.335150  | -2.055153 | 2.826222  |
| H | 6.872517  | -1.150123 | 2.690811  |

### Int-3-S-NBoc

Imaginary frequencies = 0

E(MN15,DCE) = -2301.813447

E<sub>Thermal correction</sub> = 0.479417

|    |           |           |           |
|----|-----------|-----------|-----------|
| Pd | -0.914943 | 0.893110  | -0.611984 |
| C  | 2.057478  | 0.927389  | -0.371362 |
| O  | 2.208479  | 0.980864  | -1.586894 |
| N  | -1.508901 | 0.155724  | 1.520736  |
| C  | -2.806359 | 0.716797  | -1.187959 |
| C  | -3.670663 | 1.608216  | -1.835839 |
| C  | -5.004833 | 1.262372  | -2.076272 |
| C  | -5.521211 | 0.022413  | -1.684995 |
| C  | -4.688000 | -0.893678 | -1.047390 |
| C  | -3.364819 | -0.513165 | -0.824419 |
| C  | -1.977988 | -1.081014 | 1.589061  |
| C  | -2.096850 | -1.838488 | 2.756729  |
| C  | -1.703069 | -1.153142 | 3.918451  |
| C  | -1.119456 | 0.787113  | 2.626181  |
| C  | -1.219288 | 0.152269  | 3.864980  |

|   |           |           |           |
|---|-----------|-----------|-----------|
| S | -2.291841 | -1.692723 | -0.085580 |
| O | -2.888563 | -3.020743 | -0.079816 |
| O | 0.935748  | 0.950559  | 0.269828  |
| N | -0.930120 | -1.361656 | -0.856132 |
| O | 1.204798  | -1.983332 | -1.134678 |
| C | 2.329373  | -2.914111 | -1.116529 |
| C | 3.265858  | -2.337976 | -2.167759 |
| C | 1.822653  | -4.292538 | -1.526257 |
| C | 3.012290  | -2.949146 | 0.244416  |
| C | 0.125612  | -2.170229 | -0.406090 |
| O | 0.008261  | -2.948802 | 0.527952  |
| C | -2.521294 | -3.275744 | 2.788326  |
| C | -0.520277 | 2.295976  | -2.141475 |
| C | -0.886361 | 2.959967  | -0.961384 |
| H | -3.317895 | 2.588335  | -2.168544 |
| H | -5.655608 | 1.977758  | -2.584948 |
| H | -6.562815 | -0.231240 | -1.889098 |
| H | -5.028536 | -1.887213 | -0.747025 |
| H | -1.759026 | -1.676148 | 4.876795  |
| H | -0.716059 | 1.794494  | 2.494343  |
| H | -0.901847 | 0.667952  | 4.772154  |
| H | 4.175185  | -2.954107 | -2.234016 |
| H | 3.536390  | -1.309401 | -1.891059 |
| H | 2.774828  | -2.313586 | -3.150890 |
| H | 2.677966  | -4.973018 | -1.648031 |
| H | 1.150242  | -4.708767 | -0.764313 |
| H | 1.289035  | -4.230641 | -2.486471 |
| H | 3.435806  | -1.969492 | 0.505877  |
| H | 3.849258  | -3.661960 | 0.198567  |
| H | 2.318259  | -3.271729 | 1.029685  |
| H | -1.838785 | -3.866520 | 2.160207  |
| H | -3.529035 | -3.413892 | 2.374770  |
| H | -2.496724 | -3.654499 | 3.818443  |
| H | -1.899736 | 3.331462  | -0.787687 |
| H | -1.240007 | 2.146709  | -2.948870 |
| C | 0.151502  | 3.608855  | -0.103803 |
| O | 1.276665  | 3.879325  | -0.442043 |
| O | -0.348140 | 3.916896  | 1.105602  |
| C | 0.530165  | 4.628620  | 1.963693  |
| H | -0.031620 | 4.852492  | 2.877519  |
| H | 0.864339  | 5.560740  | 1.485729  |
| H | 1.419209  | 4.026225  | 2.195437  |
| H | 0.543126  | 2.180252  | -2.374152 |
| C | 3.270628  | 0.827246  | 0.555008  |
| H | 3.142780  | -0.074648 | 1.175597  |

|   |          |           |           |
|---|----------|-----------|-----------|
| C | 3.365542 | 2.020836  | 1.502104  |
| N | 4.446895 | 0.656774  | -0.263925 |
| H | 2.478064 | 2.042748  | 2.151602  |
| H | 4.262259 | 1.909800  | 2.128086  |
| H | 3.416849 | 2.964280  | 0.939055  |
| H | 4.317103 | 0.894218  | -1.247719 |
| C | 5.518181 | -0.056224 | 0.174634  |
| O | 5.599613 | -0.471884 | 1.322028  |
| C | 6.575434 | -0.343247 | -0.869872 |
| H | 6.615975 | 0.427483  | -1.651638 |
| H | 7.549923 | -0.434280 | -0.375910 |
| H | 6.342426 | -1.308443 | -1.346604 |

### Int-3-S-Pyr

Imaginary frequencies = 0  
 E(MN15,DCE) = -2301.802581  
 E<sub>Thermal correction</sub> = 0.477689

|    |           |           |           |
|----|-----------|-----------|-----------|
| Pd | -1.347972 | 1.531763  | 0.149641  |
| C  | -2.852709 | -0.873168 | 0.576236  |
| O  | -1.999063 | -1.393047 | -0.128405 |
| N  | -0.163145 | 0.715000  | 1.688333  |
| C  | 0.127886  | 2.825716  | -0.272697 |
| C  | -0.041583 | 4.213193  | -0.402174 |
| C  | 1.045295  | 5.057605  | -0.651944 |
| C  | 2.339876  | 4.548493  | -0.785013 |
| C  | 2.552149  | 3.178573  | -0.651064 |
| C  | 1.445791  | 2.365245  | -0.396535 |
| C  | 1.136302  | 0.424803  | 1.533009  |
| C  | 1.960146  | 0.034860  | 2.598995  |
| C  | 1.309045  | -0.108783 | 3.837645  |
| C  | -0.768105 | 0.561504  | 2.870718  |
| C  | -0.050171 | 0.130349  | 3.982281  |
| S  | 1.637041  | 0.621874  | -0.221079 |
| O  | 0.619024  | -0.071816 | -1.002206 |
| O  | -2.905753 | 0.389112  | 0.868278  |
| N  | 3.148776  | 0.356950  | -0.452478 |
| O  | 4.794921  | -1.093048 | -0.811021 |
| C  | 5.458724  | -2.381351 | -0.837387 |
| C  | 6.852915  | -2.039974 | -1.346051 |
| C  | 4.747736  | -3.318611 | -1.807219 |
| C  | 5.536309  | -2.968022 | 0.569474  |
| C  | 3.534962  | -0.970407 | -0.399971 |

|   |           |           |           |
|---|-----------|-----------|-----------|
| O | 2.839216  | -1.887028 | 0.003408  |
| C | 3.438419  | -0.227355 | 2.537637  |
| C | -2.196883 | 1.944508  | -1.799980 |
| C | -2.923339 | 2.639802  | -0.856552 |
| H | -1.030235 | 4.665107  | -0.295182 |
| H | 0.875120  | 6.133128  | -0.743685 |
| H | 3.178788  | 5.215687  | -0.991077 |
| H | 3.538746  | 2.722326  | -0.747965 |
| H | 1.903936  | -0.417358 | 4.701227  |
| H | -1.837555 | 0.781686  | 2.896649  |
| H | -0.551023 | 0.006404  | 4.942901  |
| H | 7.461204  | -2.952287 | -1.426937 |
| H | 7.350050  | -1.341015 | -0.657814 |
| H | 6.789027  | -1.566479 | -2.336078 |
| H | 5.322118  | -4.252253 | -1.901003 |
| H | 3.736720  | -3.556145 | -1.453787 |
| H | 4.681676  | -2.852207 | -2.801452 |
| H | 5.955732  | -2.222719 | 1.263741  |
| H | 6.202297  | -3.843659 | 0.564251  |
| H | 4.545328  | -3.279942 | 0.922678  |
| H | 3.954708  | 0.458445  | 1.855777  |
| H | 3.627201  | -1.251307 | 2.183749  |
| H | 3.867533  | -0.127303 | 3.543397  |
| H | -3.827873 | 2.174306  | -0.455030 |
| H | -1.401036 | 2.407013  | -2.389365 |
| C | -2.677373 | 0.595804  | -2.259211 |
| O | -3.780878 | 0.164306  | -2.011000 |
| O | -1.754759 | -0.020133 | -2.974061 |
| C | -2.006443 | -1.381550 | -3.307529 |
| H | -1.189078 | -1.696841 | -3.963683 |
| H | -2.974480 | -1.477937 | -3.820569 |
| H | -2.011201 | -1.979465 | -2.385508 |
| H | -2.757022 | 3.701953  | -0.676238 |
| C | -3.987858 | -1.705011 | 1.197458  |
| H | -4.909053 | -1.371615 | 0.691814  |
| C | -4.120983 | -1.413088 | 2.688150  |
| N | -3.807354 | -3.118315 | 0.970850  |
| H | -4.311516 | -0.344397 | 2.849047  |
| H | -4.940949 | -2.000148 | 3.124519  |
| H | -3.189017 | -1.680633 | 3.215233  |
| H | -3.108348 | -3.578262 | 1.552809  |
| C | -3.947168 | -3.750134 | -0.246101 |
| O | -3.454519 | -4.844855 | -0.446062 |
| C | -4.788017 | -3.036124 | -1.278944 |
| H | -5.798825 | -2.838537 | -0.889464 |

H -4.344639 -2.068148 -1.556254  
H -4.857241 -3.683104 -2.160699

#### Int-4-R

Imaginary frequencies = 0  
E(MN15,DCE) = -2301.831898  
E<sub>Thermal correction</sub> = 0.480025

Pd 0.149722 0.254788 -0.378175  
C -2.469200 -0.041742 0.572401  
O -2.241662 -1.256630 0.506623  
N 0.937029 -0.806973 1.387001  
C 2.267407 -0.726673 1.446842  
C 3.062607 -1.295086 2.444100  
C 2.337465 -1.959622 3.449333  
C 0.266953 -1.461506 2.336966  
C 0.950661 -2.047208 3.404065  
S 2.947159 0.106855 -0.026855  
O 4.378910 -0.117510 -0.129888  
O -1.610486 0.888592 0.366064  
N 1.952520 -0.383373 -1.178536  
O 0.950485 -2.104604 -2.171838  
C 0.306075 -3.413932 -2.113936  
C -0.948504 -3.205568 -2.948375  
C -0.073091 -3.727122 -0.669945  
C 1.229288 -4.459744 -2.722189  
C 1.927028 -1.782460 -1.345581  
O 2.675970 -2.543145 -0.766314  
C 4.564337 -1.283724 2.463389  
C 1.333847 2.212572 -2.082426  
C -0.003620 1.467517 -1.986834  
H 2.890327 -2.427245 4.268235  
H -0.815851 -1.522876 2.202773  
H 0.396357 -2.578034 4.178937  
H -1.528619 -4.138248 -2.996690  
H -0.682886 -2.899001 -3.970332  
H -1.568729 -2.420547 -2.489443  
H -0.694553 -4.634673 -0.654609  
H 0.815793 -3.905890 -0.049233  
H -0.665690 -2.896134 -0.252275  
H 1.498903 -4.178760 -3.751010  
H 0.714268 -5.431370 -2.751895  
H 2.145288 -4.560102 -2.125282

H 4.981690 -0.273992 2.350162  
H 4.952704 -1.869445 1.618223  
H 4.927855 -1.717753 3.403870  
H -0.168082 0.794360 -2.840924  
H 2.055469 1.574546 -2.607442  
C -1.147997 2.403218 -1.820124  
O -1.050660 3.545111 -1.415992  
O -2.323289 1.872618 -2.184110  
C -3.449483 2.695115 -1.940691  
H -3.491482 2.981745 -0.878976  
H -4.337092 2.112972 -2.214188  
H -3.399856 3.616611 -2.539467  
H 1.196955 3.127051 -2.681861  
C 2.587905 1.833656 0.179723  
C 3.138942 2.325745 1.369696  
C 1.920624 2.655944 -0.753817  
C 2.997603 3.670449 1.692700  
C 1.802500 4.004913 -0.387622  
C 2.319465 4.507236 0.805375  
H 3.411216 4.056962 2.625415  
H 1.252525 4.659585 -1.065305  
H 2.187319 5.564450 1.043995  
H 3.669212 1.648866 2.045950  
C -3.862100 0.459241 0.946743  
H -4.276853 0.953215 0.049867  
C -3.809361 1.494591 2.066708  
N -4.688089 -0.683041 1.265588  
H -3.184595 2.344857 1.760824  
H -4.828972 1.841956 2.279778  
H -3.380909 1.053151 2.979761  
H -4.205951 -1.580379 1.245325  
C -6.044466 -0.595420 1.237915  
O -6.628424 0.460991 1.046707  
C -6.790355 -1.892352 1.474471  
H -6.128760 -2.760512 1.594354  
H -7.410225 -1.780517 2.374798  
H -7.472652 -2.062631 0.630662

#### Int-4-S

Imaginary frequencies = 0  
E(MN15,DCE) = -2301.835162  
E<sub>Thermal correction</sub> = 0.479081

|    |           |           |           |   |           |           |           |
|----|-----------|-----------|-----------|---|-----------|-----------|-----------|
| Pd | 0.144275  | -0.411404 | -0.214435 | H | -3.835637 | -0.260479 | -3.346862 |
| C  | -2.471755 | -0.566221 | 0.722943  | H | -2.511241 | 0.870317  | -3.798515 |
| O  | -2.403063 | 0.668670  | 0.784087  | H | 1.451962  | -2.778290 | -2.973488 |
| N  | 0.859808  | 0.557013  | 1.620625  | C | 2.835360  | -1.686399 | -0.006557 |
| C  | 2.192460  | 0.619623  | 1.638733  | C | 3.540633  | -2.248545 | 1.063808  |
| C  | 2.953022  | 1.135247  | 2.690897  | C | 2.273908  | -2.465694 | -1.044046 |
| C  | 2.192278  | 1.568860  | 3.792150  | C | 3.673158  | -3.629459 | 1.165589  |
| C  | 0.152015  | 0.992857  | 2.663137  | C | 2.446562  | -3.851159 | -0.907057 |
| C  | 0.803245  | 1.502925  | 3.787890  | C | 3.119888  | -4.431067 | 0.167958  |
| S  | 2.906865  | 0.090582  | 0.041599  | H | 4.207212  | -4.069082 | 2.009199  |
| O  | 4.285777  | 0.536896  | -0.061087 | H | 2.022601  | -4.491979 | -1.684144 |
| O  | -1.492785 | -1.354759 | 0.467349  | H | 3.212345  | -5.517588 | 0.223077  |
| N  | 1.795254  | 0.563587  | -0.999609 | H | 3.979957  | -1.597732 | 1.825194  |
| O  | 0.474166  | 2.216364  | -1.677956 | C | -3.804516 | -1.276253 | 0.940906  |
| C  | -0.320675 | 3.416540  | -1.447451 | H | -3.666416 | -2.034528 | 1.730368  |
| C  | -1.600620 | 3.104189  | -2.206680 | C | -4.240116 | -1.993228 | -0.337205 |
| C  | -0.617673 | 3.550268  | 0.042427  | N | -4.770836 | -0.300190 | 1.389136  |
| C  | 0.408172  | 4.624316  | -2.017635 | H | -3.469790 | -2.709613 | -0.652736 |
| C  | 1.559167  | 1.955182  | -0.980133 | H | -5.183945 | -2.521193 | -0.145143 |
| O  | 2.242603  | 2.744915  | -0.360560 | H | -4.386777 | -1.262765 | -1.146776 |
| C  | 4.446330  | 1.297559  | 2.684028  | H | -4.481869 | 0.671631  | 1.291710  |
| C  | 1.470524  | -1.966349 | -2.226874 | C | -5.929413 | -0.667373 | 1.994055  |
| C  | 0.044273  | -1.588825 | -1.837550 | O | -6.233574 | -1.837357 | 2.174356  |
| H  | 2.717984  | 1.980298  | 4.657779  | C | -6.832864 | 0.471029  | 2.422948  |
| H  | -0.935207 | 0.940037  | 2.558513  | H | -6.381141 | 1.462431  | 2.284594  |
| H  | 0.222359  | 1.855937  | 4.640777  | H | -7.765450 | 0.415134  | 1.844015  |
| H  | -2.306941 | 3.943063  | -2.126763 | H | -7.098184 | 0.328783  | 3.479022  |
| H  | -1.373267 | 2.921972  | -3.267468 |   |           |           |           |
| H  | -2.059897 | 2.200045  | -1.775655 |   |           |           |           |
| H  | -1.338347 | 4.368320  | 0.189536  |   |           |           |           |
| H  | 0.290636  | 3.780415  | 0.615999  |   |           |           |           |
| H  | -1.074689 | 2.616155  | 0.407986  |   |           |           |           |
| H  | 0.627477  | 4.468307  | -3.084094 |   |           |           |           |
| H  | -0.227473 | 5.516865  | -1.919960 |   |           |           |           |
| H  | 1.349136  | 4.796784  | -1.478537 |   |           |           |           |
| H  | 4.973501  | 0.375753  | 2.403835  |   |           |           |           |
| H  | 4.736306  | 2.050553  | 1.937674  |   |           |           |           |
| H  | 4.790433  | 1.618782  | 3.675733  |   |           |           |           |
| H  | -0.558899 | -2.440949 | -1.491995 |   |           |           |           |
| H  | 1.942927  | -1.101543 | -2.709510 |   |           |           |           |
| C  | -0.679285 | -0.833843 | -2.895038 |   |           |           |           |
| O  | -0.177161 | -0.308200 | -3.864818 |   |           |           |           |
| O  | -2.007896 | -0.800417 | -2.664725 |   |           |           |           |
| C  | -2.790030 | -0.184212 | -3.668576 |   |           |           |           |
| H  | -2.654543 | -0.692147 | -4.635187 |   |           |           |           |

## References

- (1) (a) Sreedhar, B.; Reddy, P. S.; Reddy, M. A. Catalyst-Free and Base-Free Water-Promoted S<sub>N</sub>Ar Reaction of Heteroaryl Halides with Thiols, *Synthesis* **2009**, 2009, 1732. (b) Xie, Y.; Zhou, B.; Zhou, S.; Zhou, S.; Wei, W.; Liu, J.; Zhan, Y.; Cheng, D.; Chen, M.; Li, Y.; et al. Sulfimine-Promoted Fast O Transfer: One-Step Synthesis of Sulfoximine from Sulfide. *ChemistrySelect* **2017**, 2, 1620–1624. (c) In, J.; Hwang, S.; Kim, C.; Seo, J. H.; Kim, S. *Eur. J. Org. Chem.* **2013**, 2013, 965–971.
- 2 Nakamura, Y.; Hirai, M.; Tamotsu, K.; Yonezawa, Y.; Shin, C. Dehydrooligopeptides. XVII. Practical Syntheses of All of the Diastereomers of N,N-Protected 2,3-Diaminobutanoic Acids from L- and D-Threonine Derivatives, *Bull. Chem. Soc. Jpn.* **1995**, 68, 1369–1377.
- 3 Bruker SMART V5.630 and SAINT-PLUS V6.45, Bruker-Nonius Analytical X-ray Systems Inc.: Madison, Wisconsin, USA 2003. SADABS, Empirical absorption correction program, Bruker AXS Inc., Madison, Wisconsin, USA 1997.
- 4 Sheldrick G M, *Acta Crystallogr*64A (2008) 112.
- 5 M. J. Frisch, et al. Gaussian16, Revision B.01., **2016**
- 6 Yu, H. S.; He, X.; Li, S. L.; Truhlar, D. G. A Kohn-Sham Global-Hybrid Exchange-Correlation Density Functional with Broad Accuracy for Multi-Reference and Single-Reference Systems and Noncovalent Interactions. *Chem. Sci.* **2016**, 7, 5032–5051.
- 7 Weigend, F.; Ahlrichs, R. Balanced basis sets of split valence, triple zeta valence and quadruple zeta valence quality for H to Rn: Design and assessment of accuracy. *Phys Chem Chem Phys.* **2005**, 7, 3297-3305.
- 8 Weigend, F. Accurate Coulomb-fitting basis sets for H to Rn, *Phys. Chem. Chem. Phys.* **2006**, 8, 1057–1065.
- 9 Achar, T. K.; Zhang, S.; Mondal, R.; M, S. S.; Maiti, S.; Maity, S.; Pal, N.; Paton, R. S.; Maiti, D. Palladium-Catalyzed Directed meta-Selective C-H Allylation of Arenes: Unactivated Internal Olefins as Allyl Surrogates. *Angew. Chem., Int. Ed.* **2019**, 58, 10353–10360.
- 10 Cheng, G. J.; Chen, P.; Sun, T. Y.; Zhang, X. H.; Yu, J. Q.; Wu, Y. D. A Combined IM-MS/DFT Study on [Pd(MPAA)]-Catalyzed Enantioselective C–H Activation: Relay of Chirality through a Rigid Framework. *Chem. - Eur. J.* **2015**, 21, 11180–11188.

11 Cheng, G.-J.; Yang, Y.-F.; Liu, P.; Chen, P.; Sun, T.-Y.; Li, G.; Zhang, X.; Houk, K. N.; Yu, J.- Q.; Wu, Y.-D. Role of N-Acyl Amino Acid Ligands in Pd(II)-Catalyzed Remote C–H Activation of Tethered Arenes. *J. Am. Chem. Soc.* **2014**, *136*, 894–897.

k-7-91

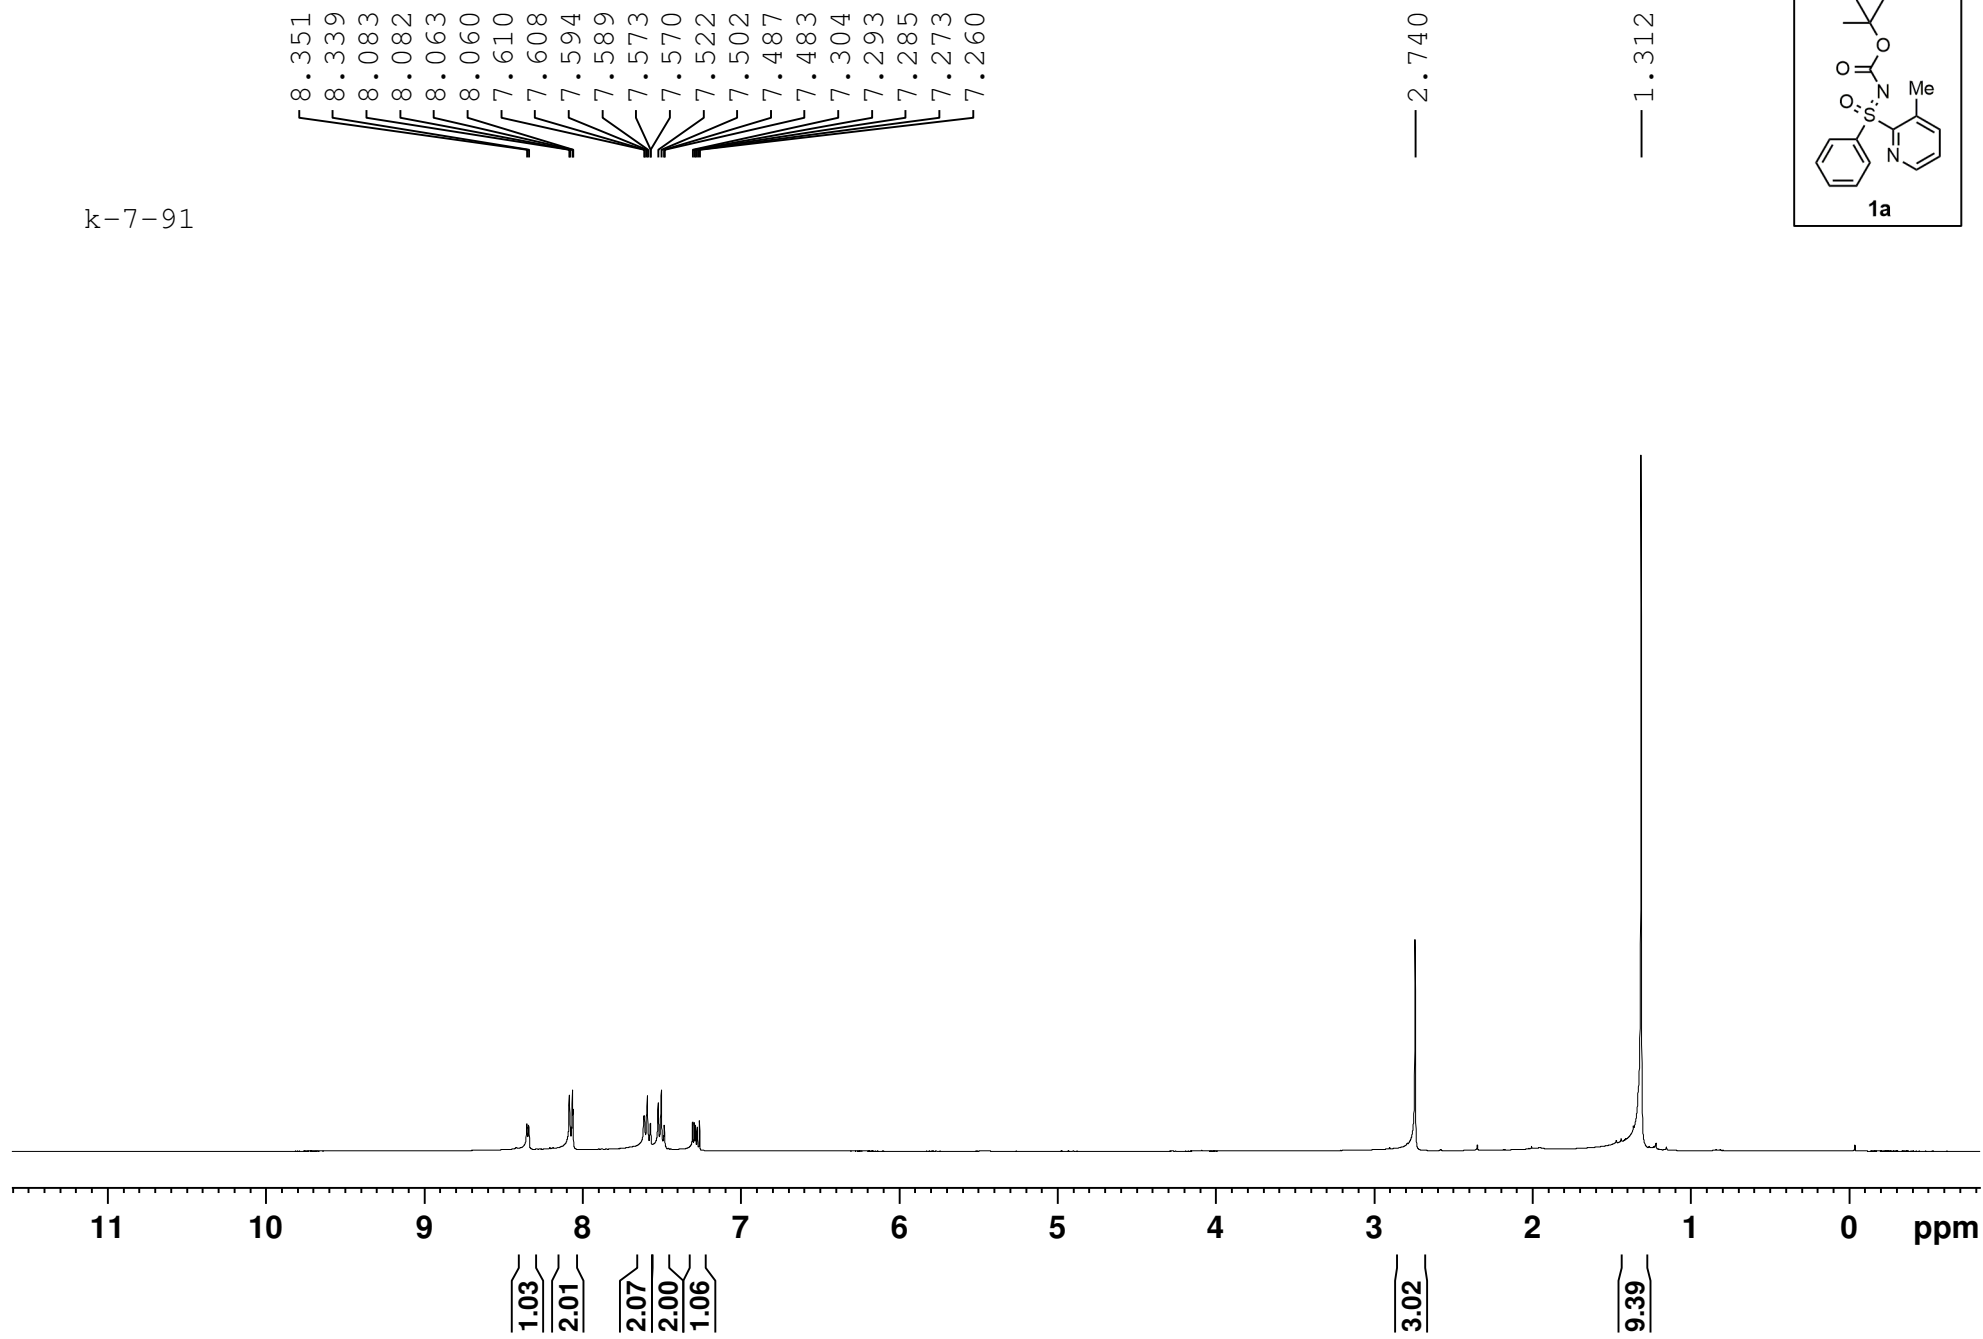



157.45  
155.08  
146.39  
141.67  
136.93  
134.97  
133.46  
129.18  
128.77  
126.50

80.34  
77.31  
77.00  
76.68

27.81  
19.12

K-7-91

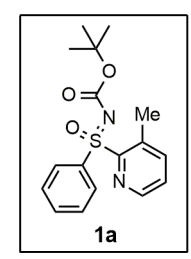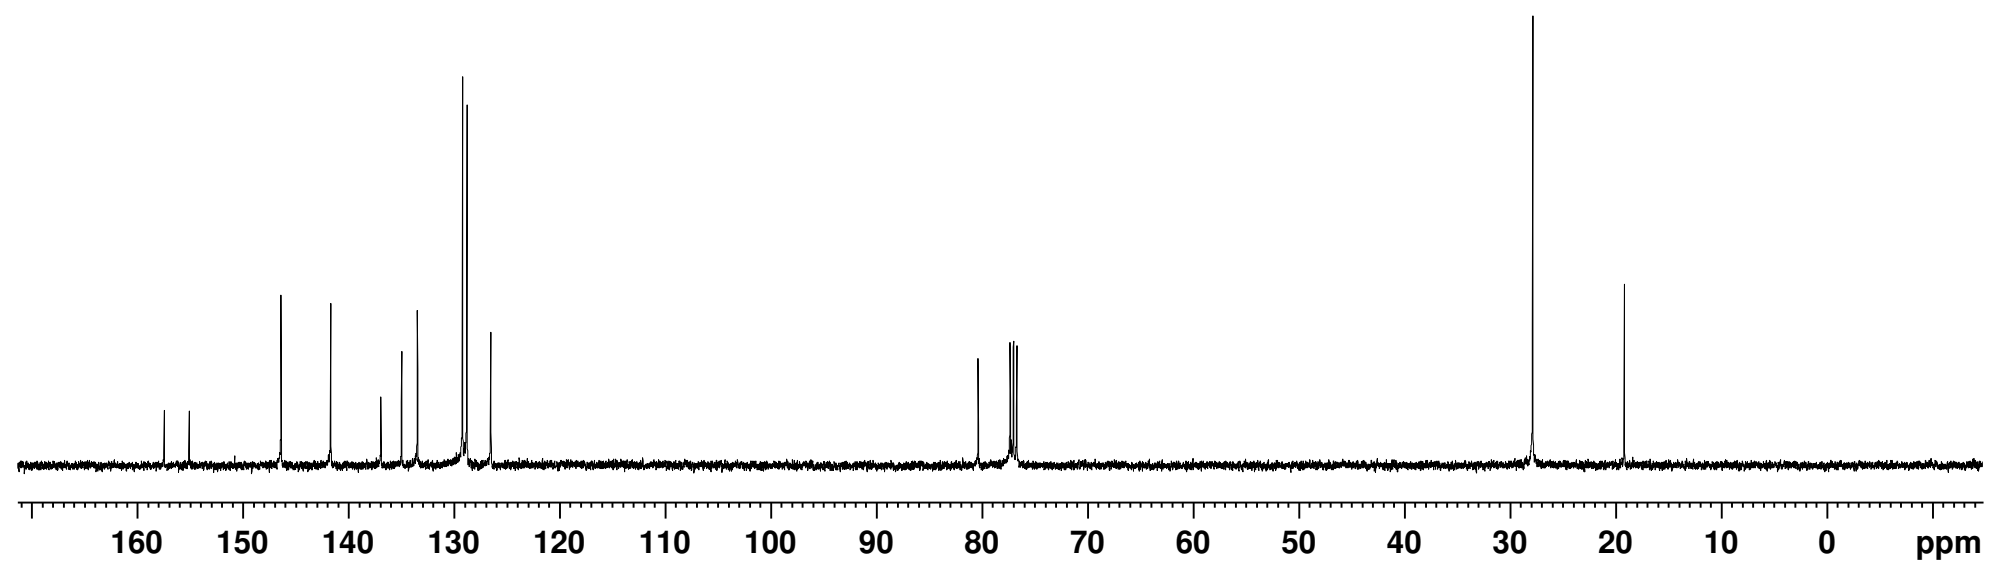

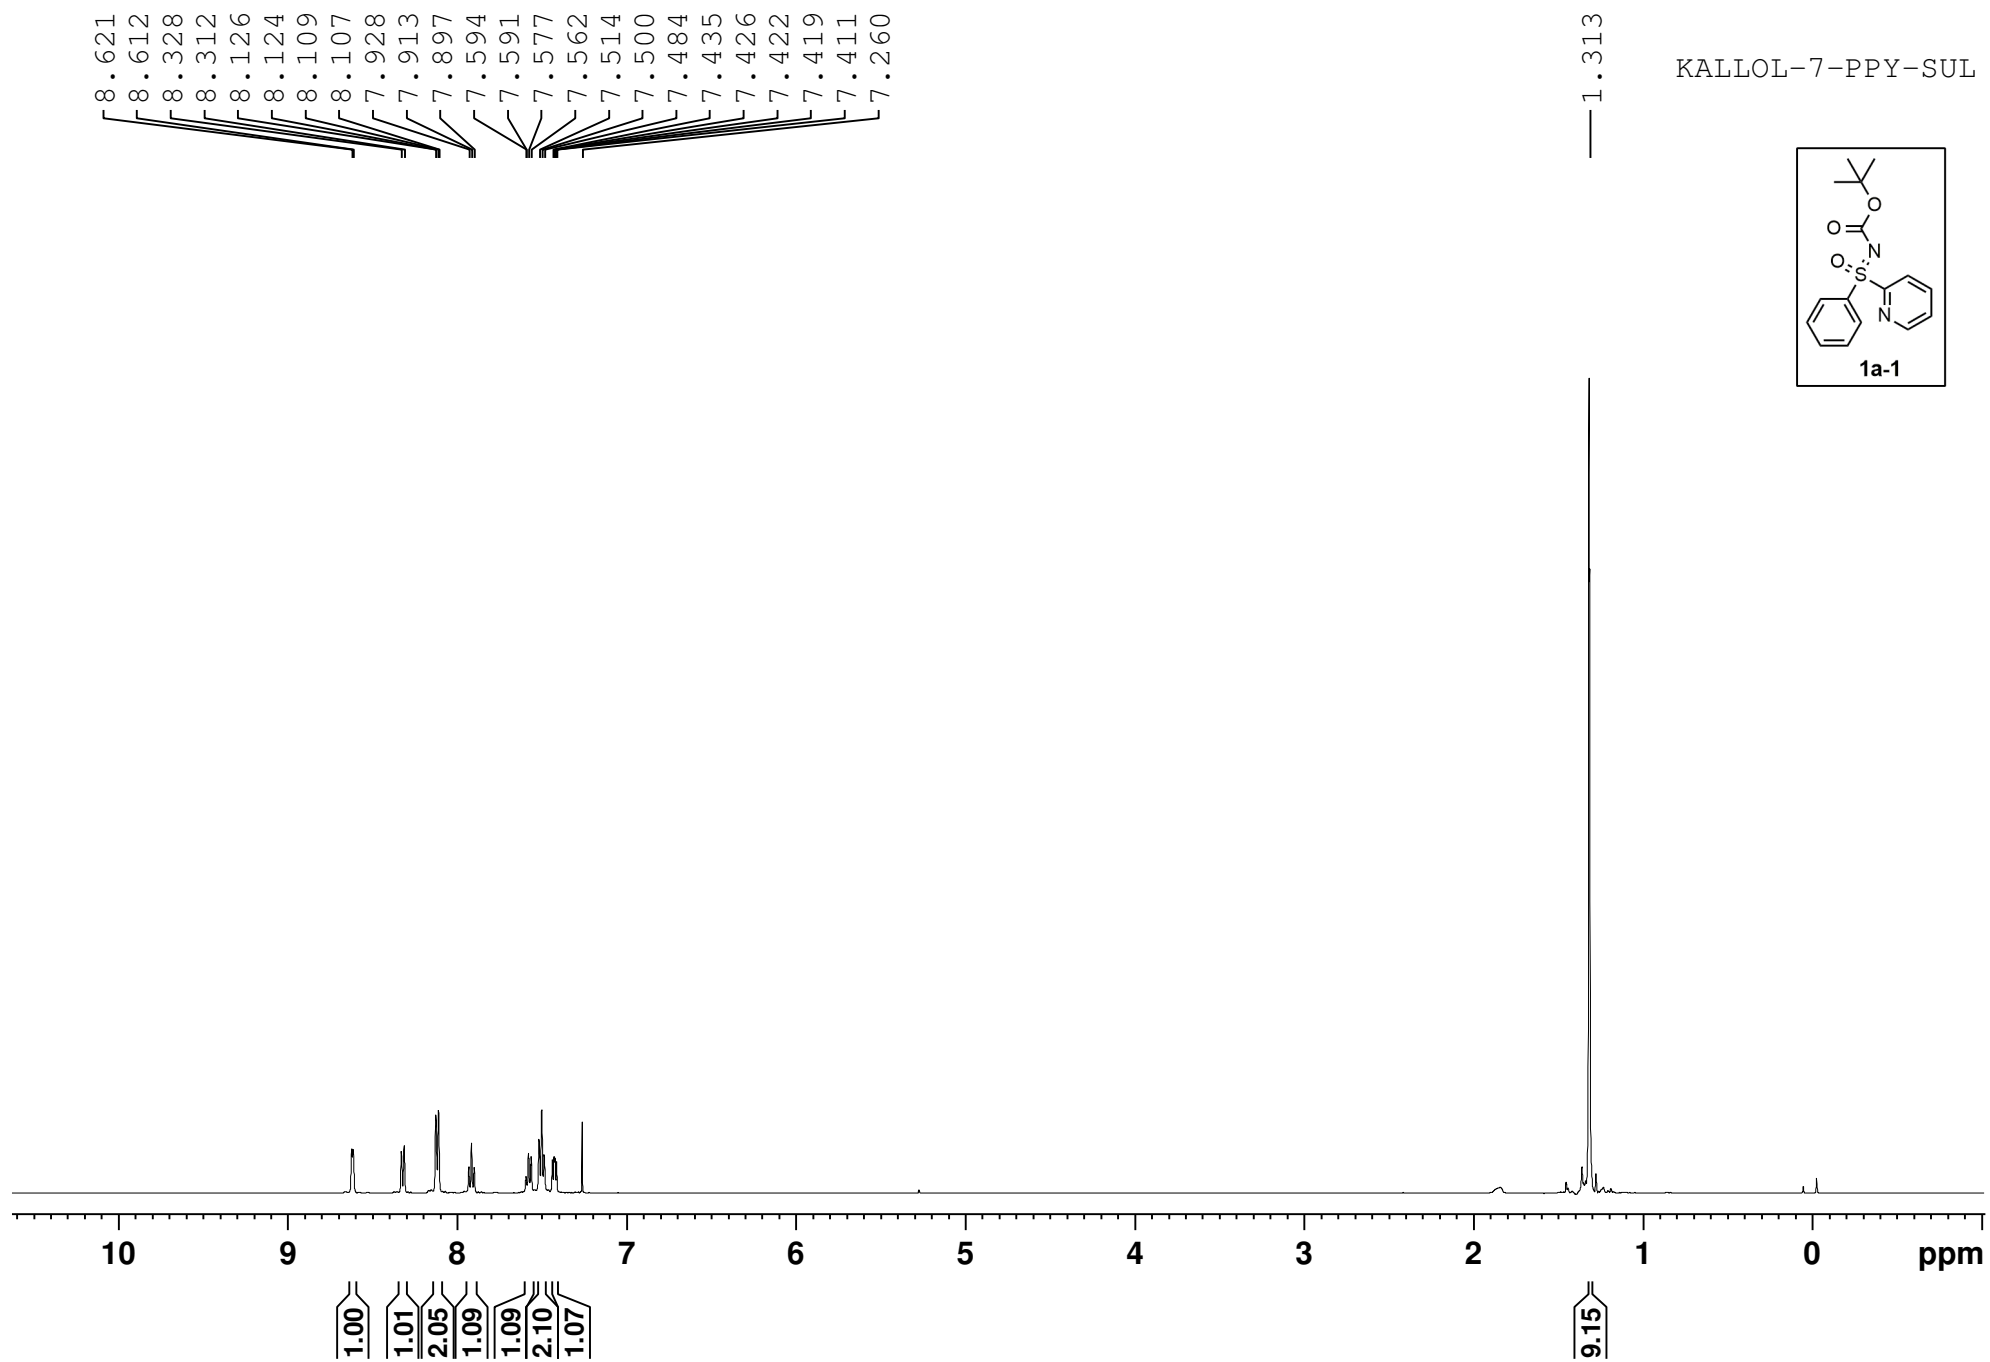

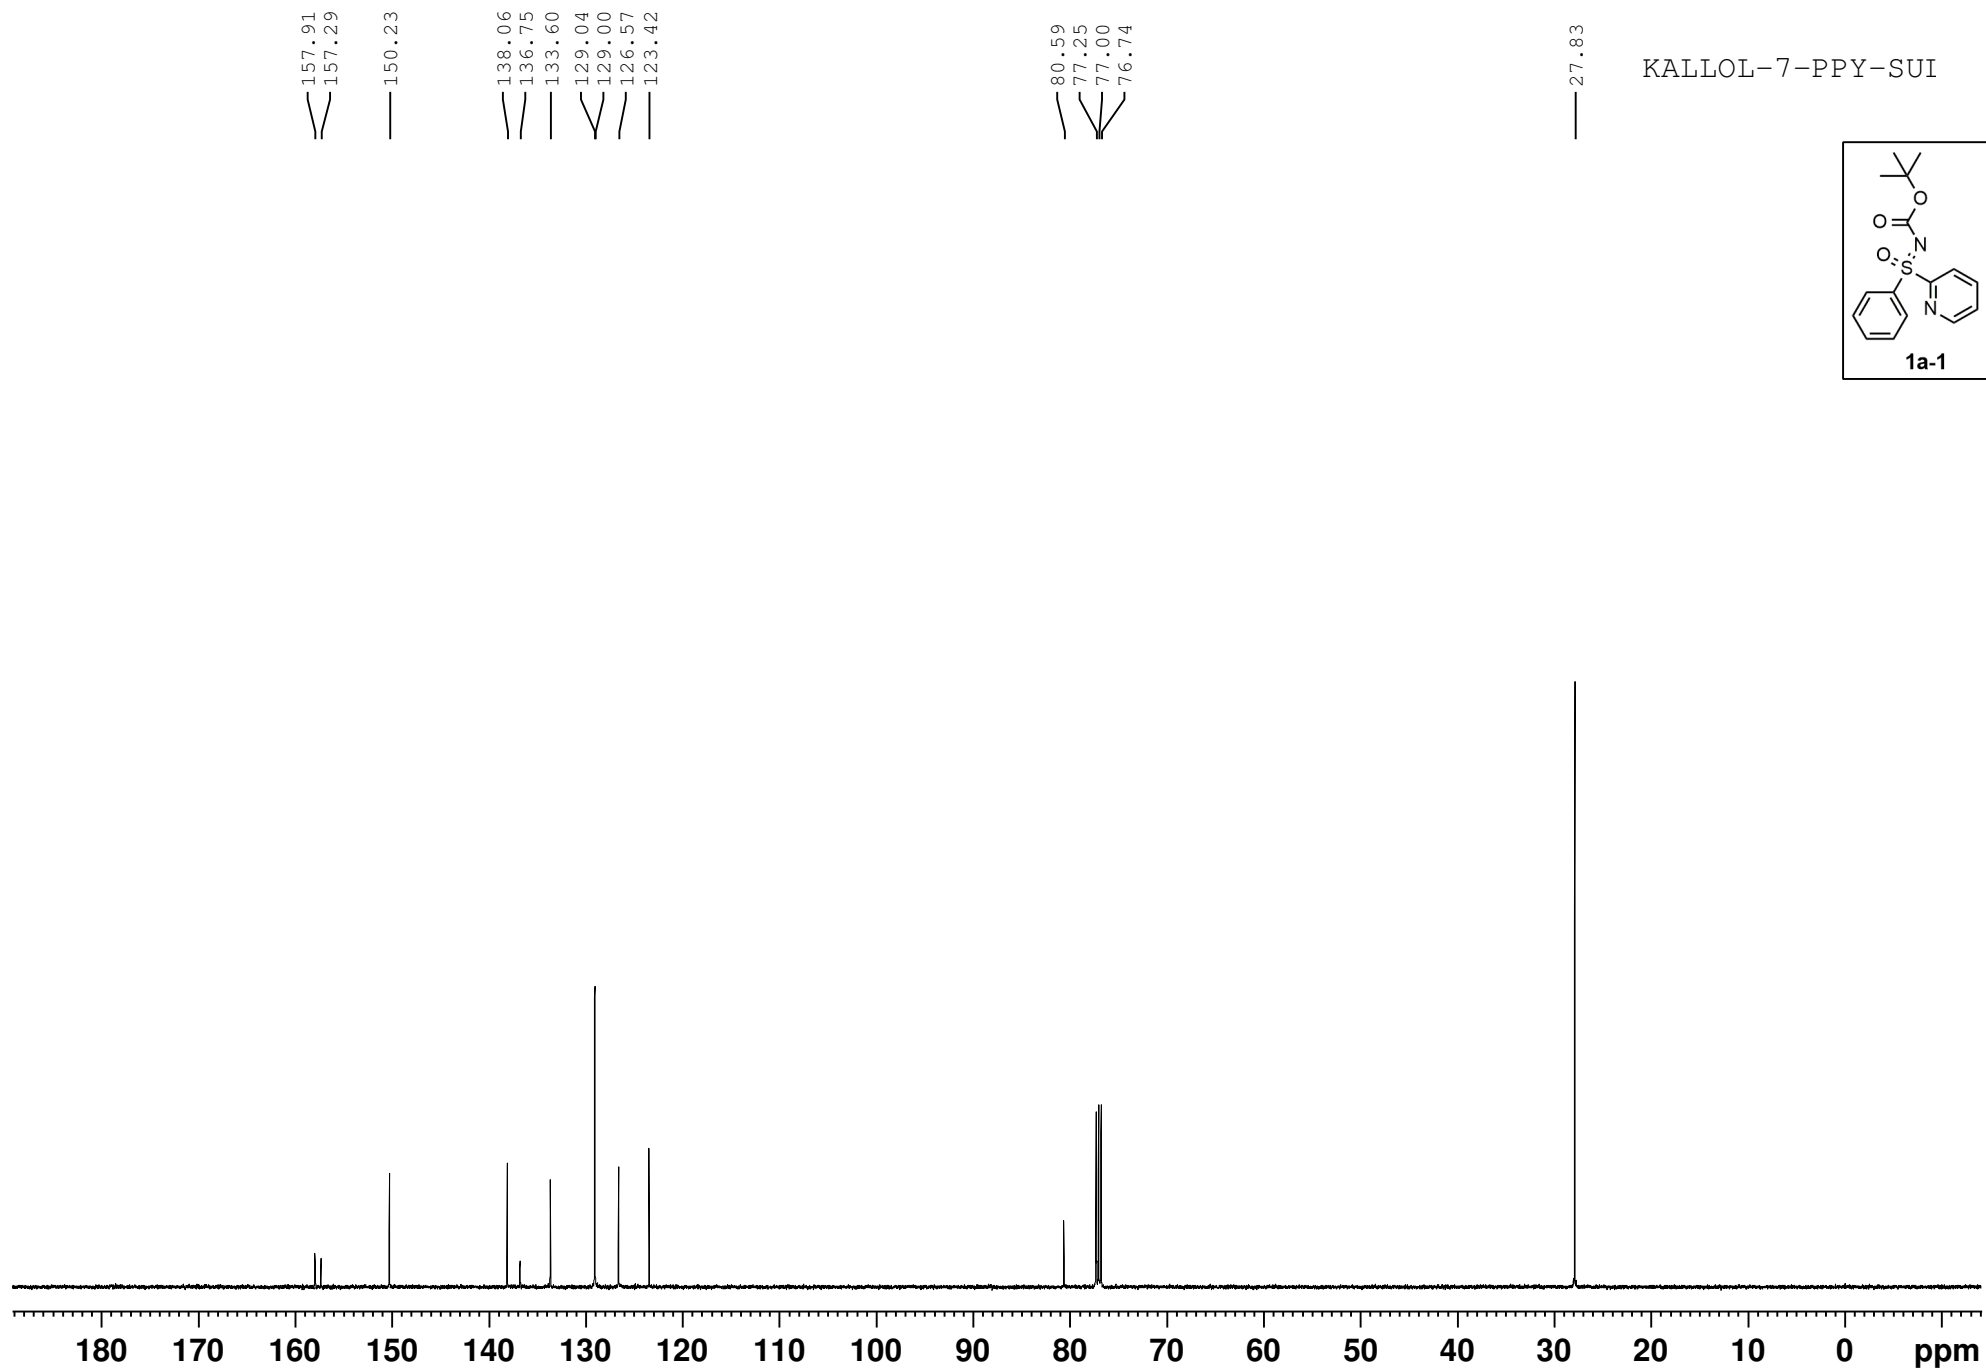

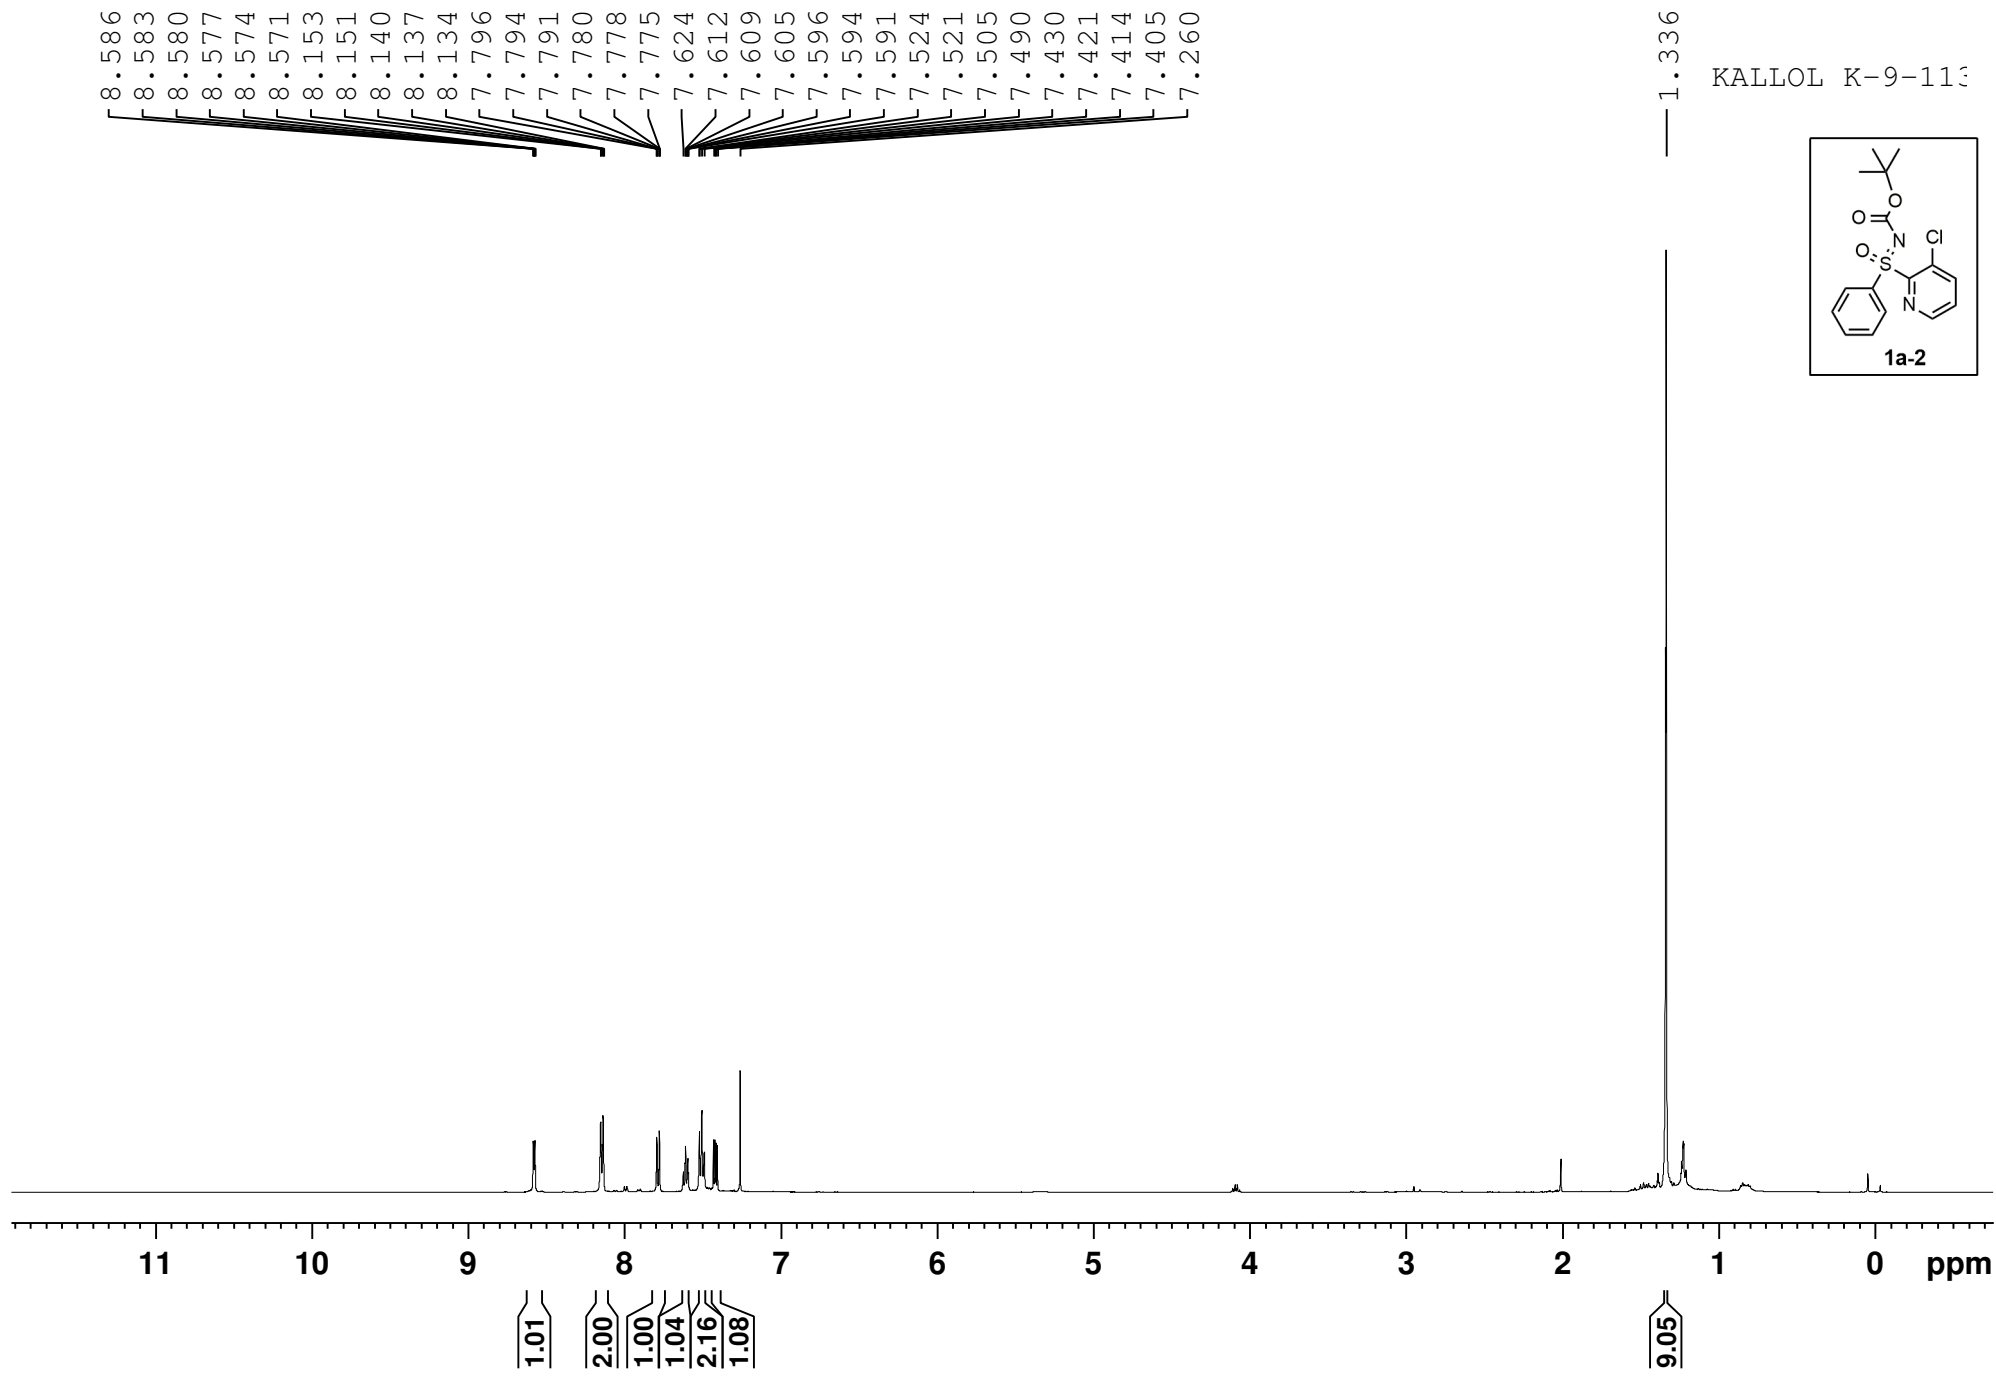

K 9-113

156.95  
153.30  
147.19  
140.73  
135.85  
134.00  
130.80  
129.39  
128.96  
127.75

80.72  
77.25  
77.00  
76.74

27.82

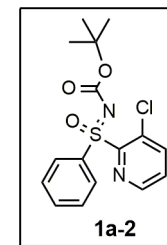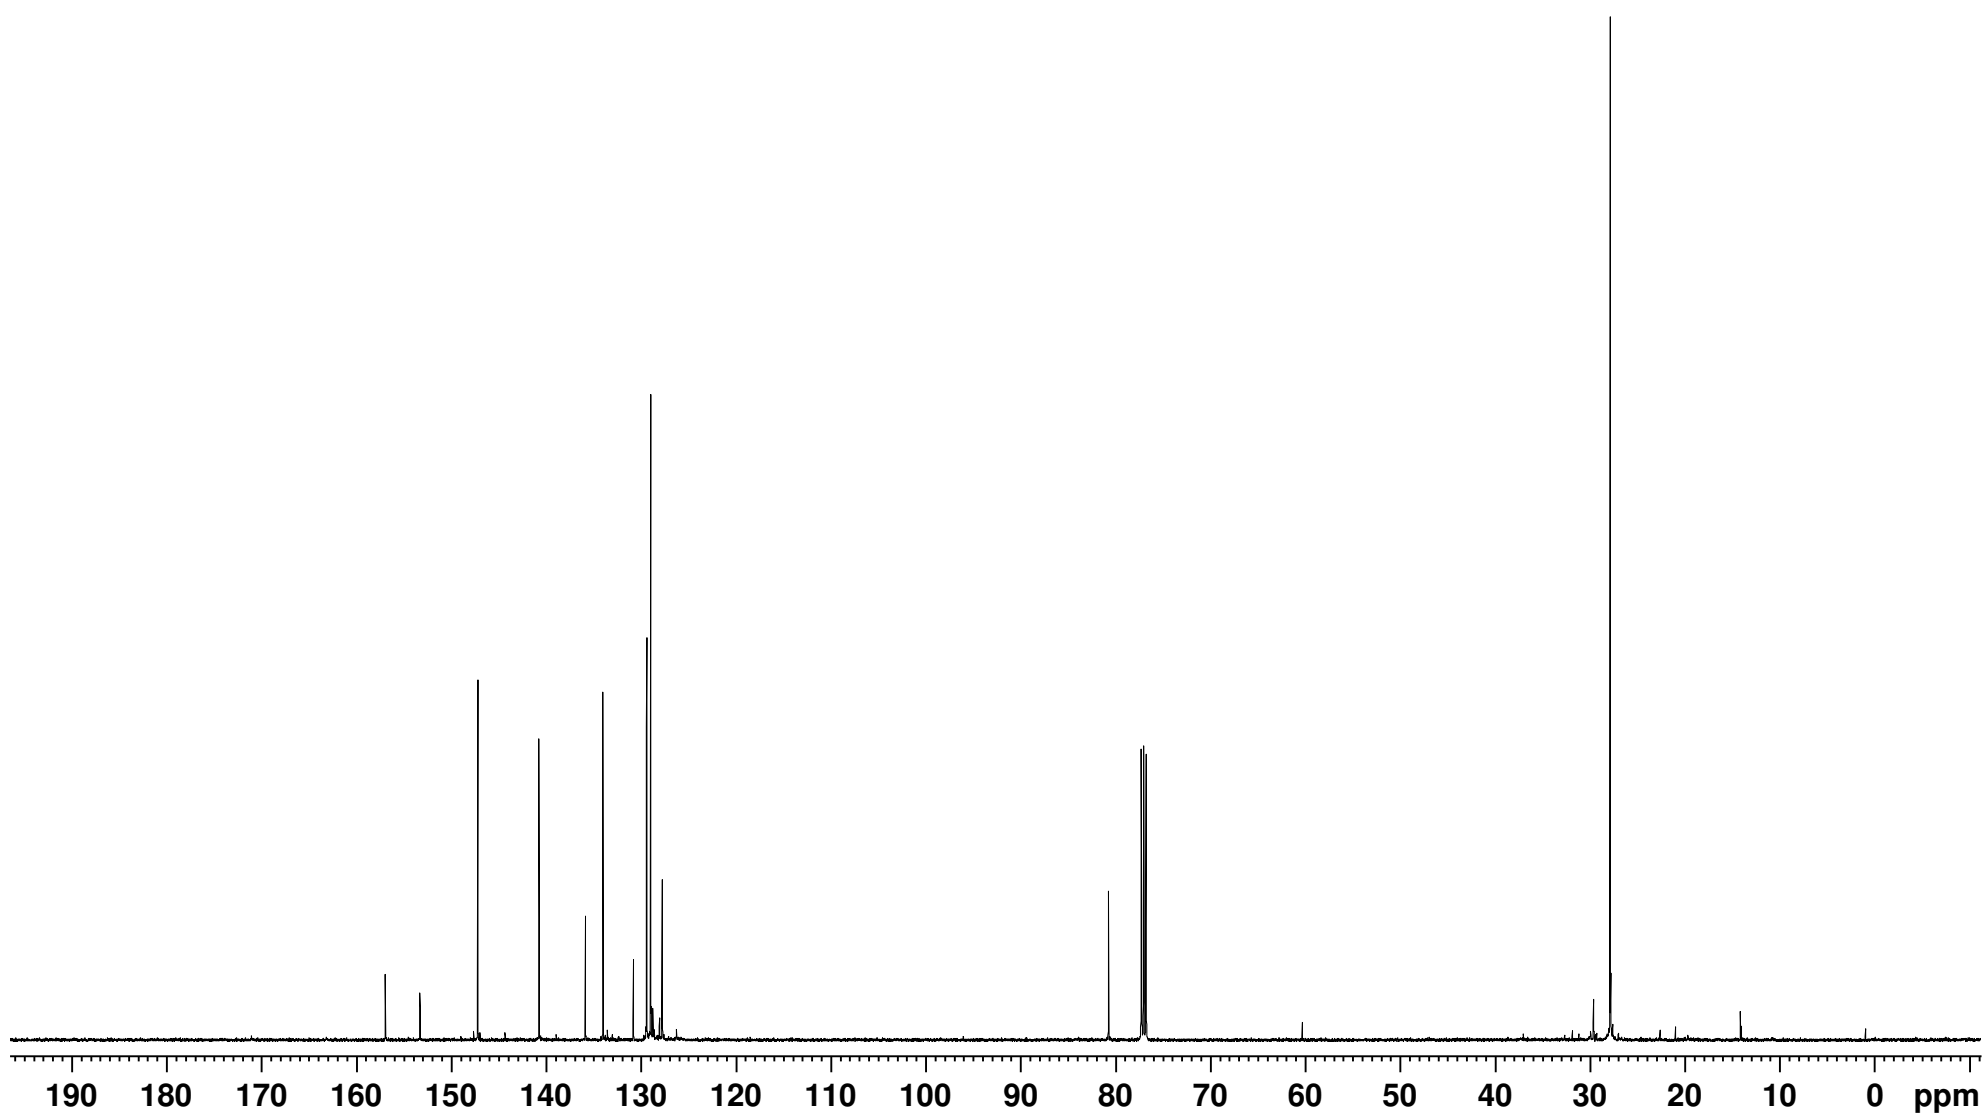

K-9-112

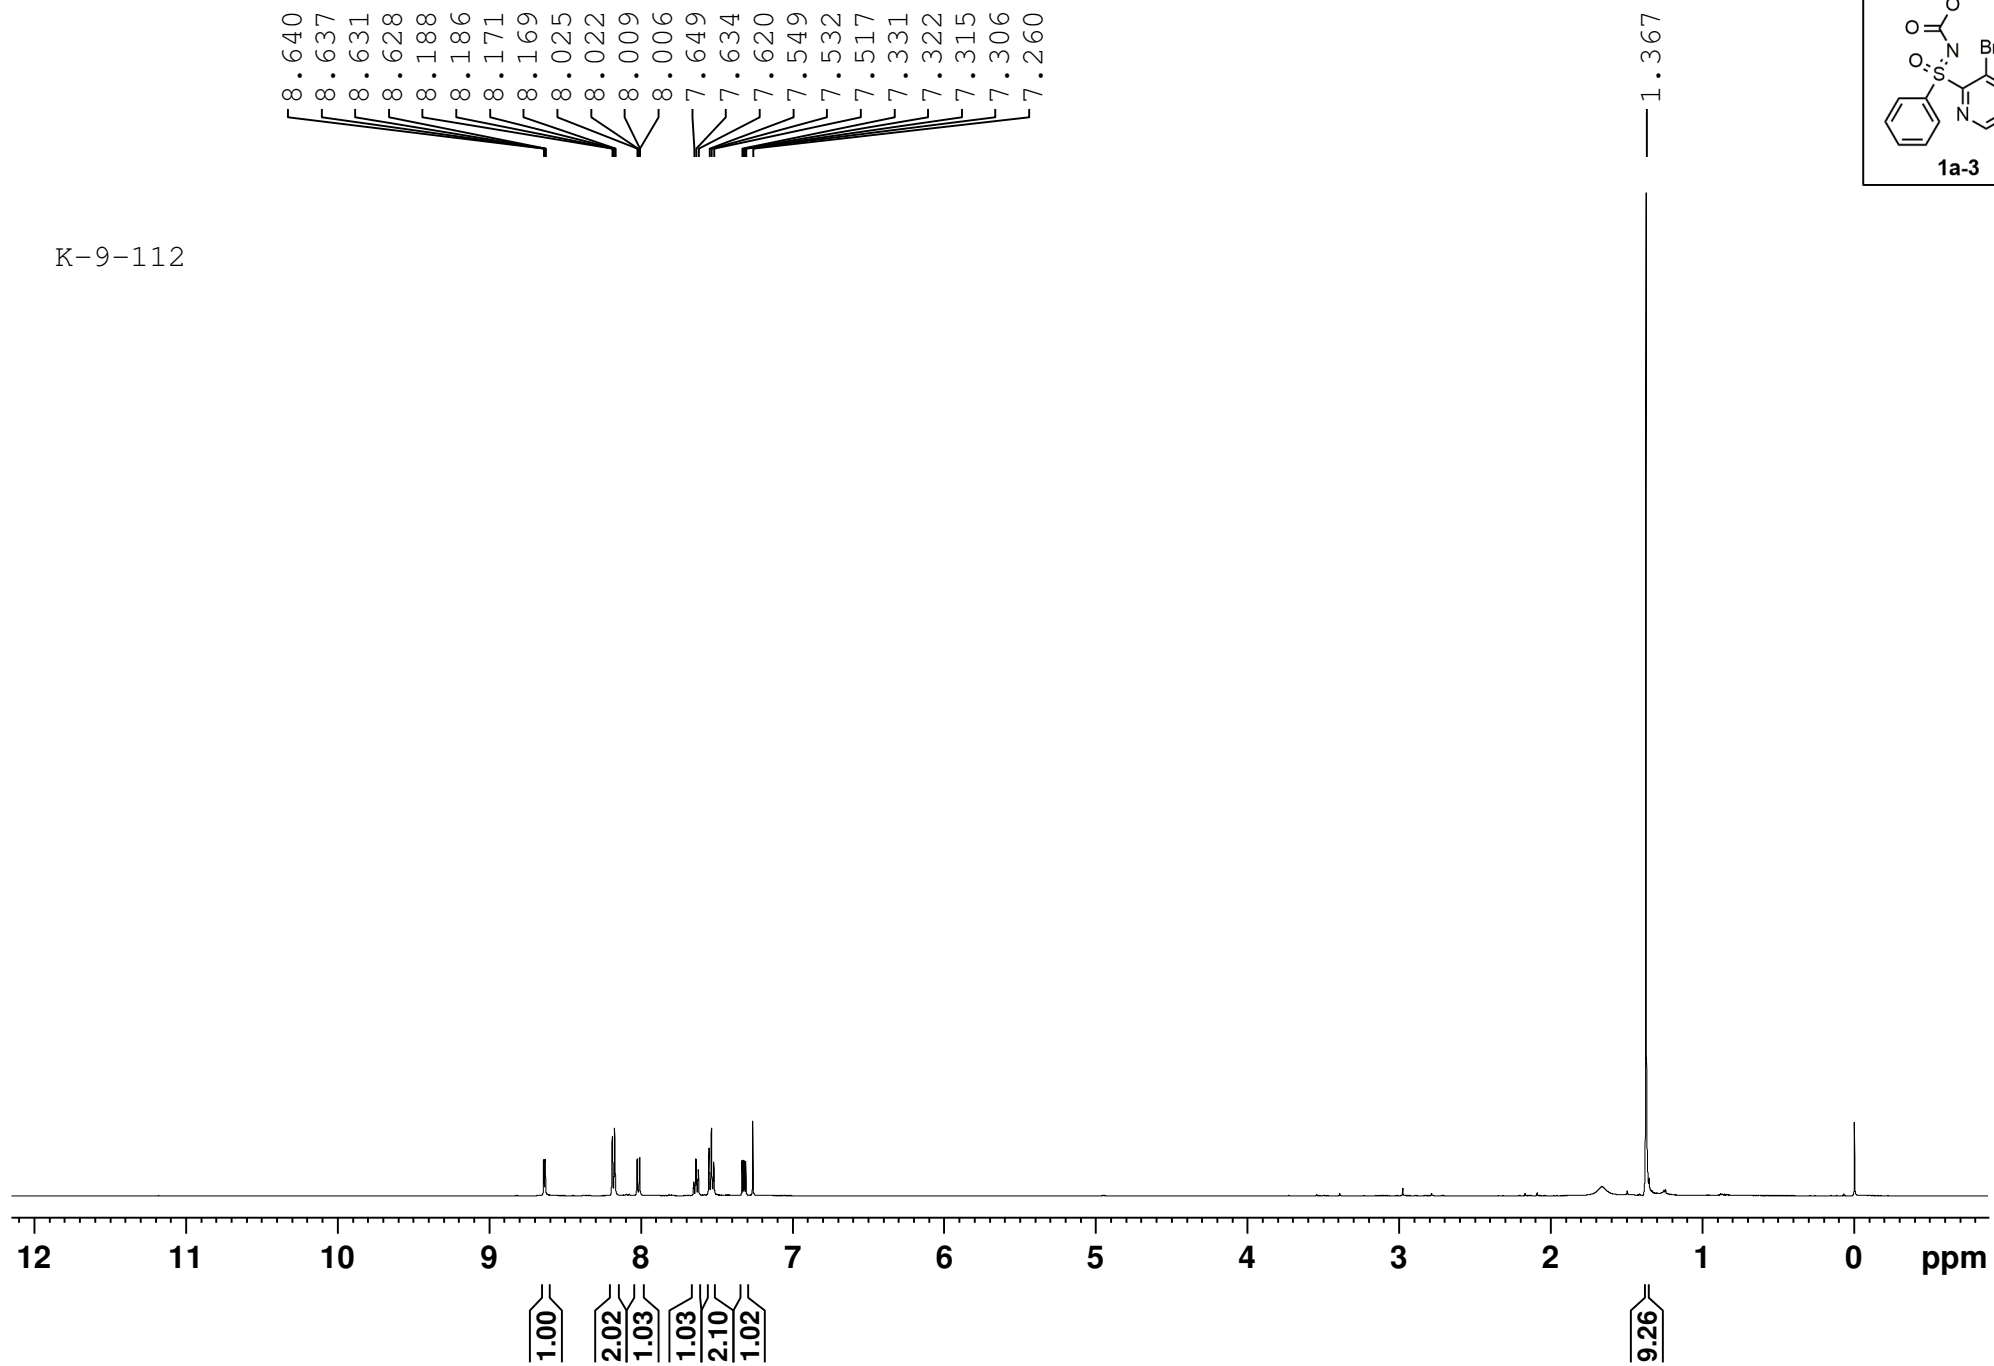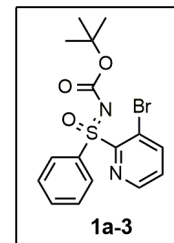

K-9-112

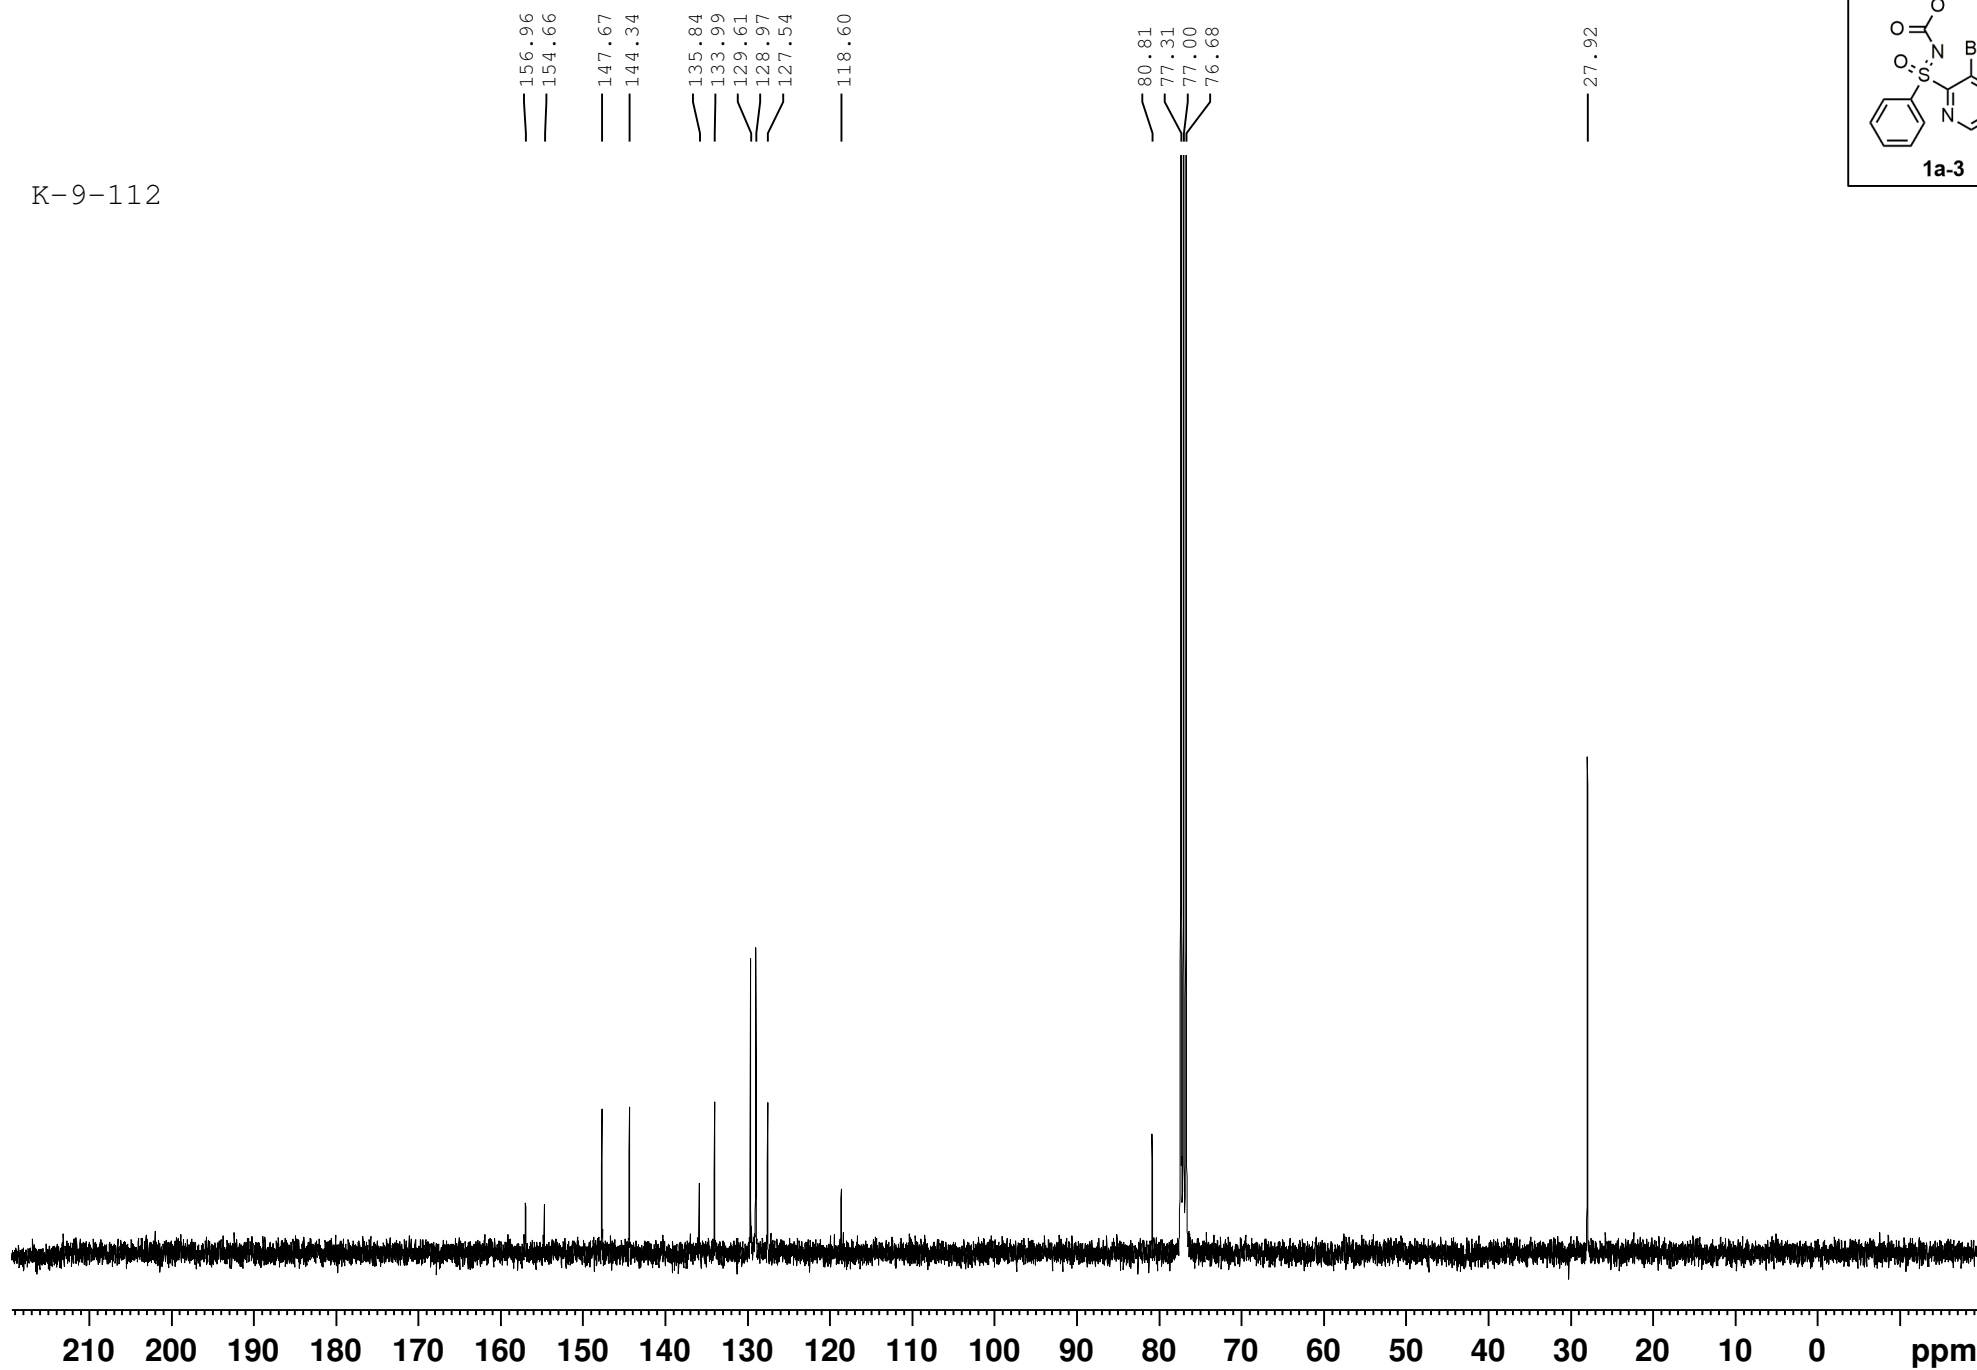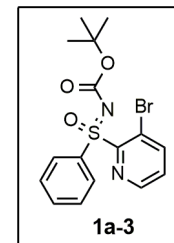

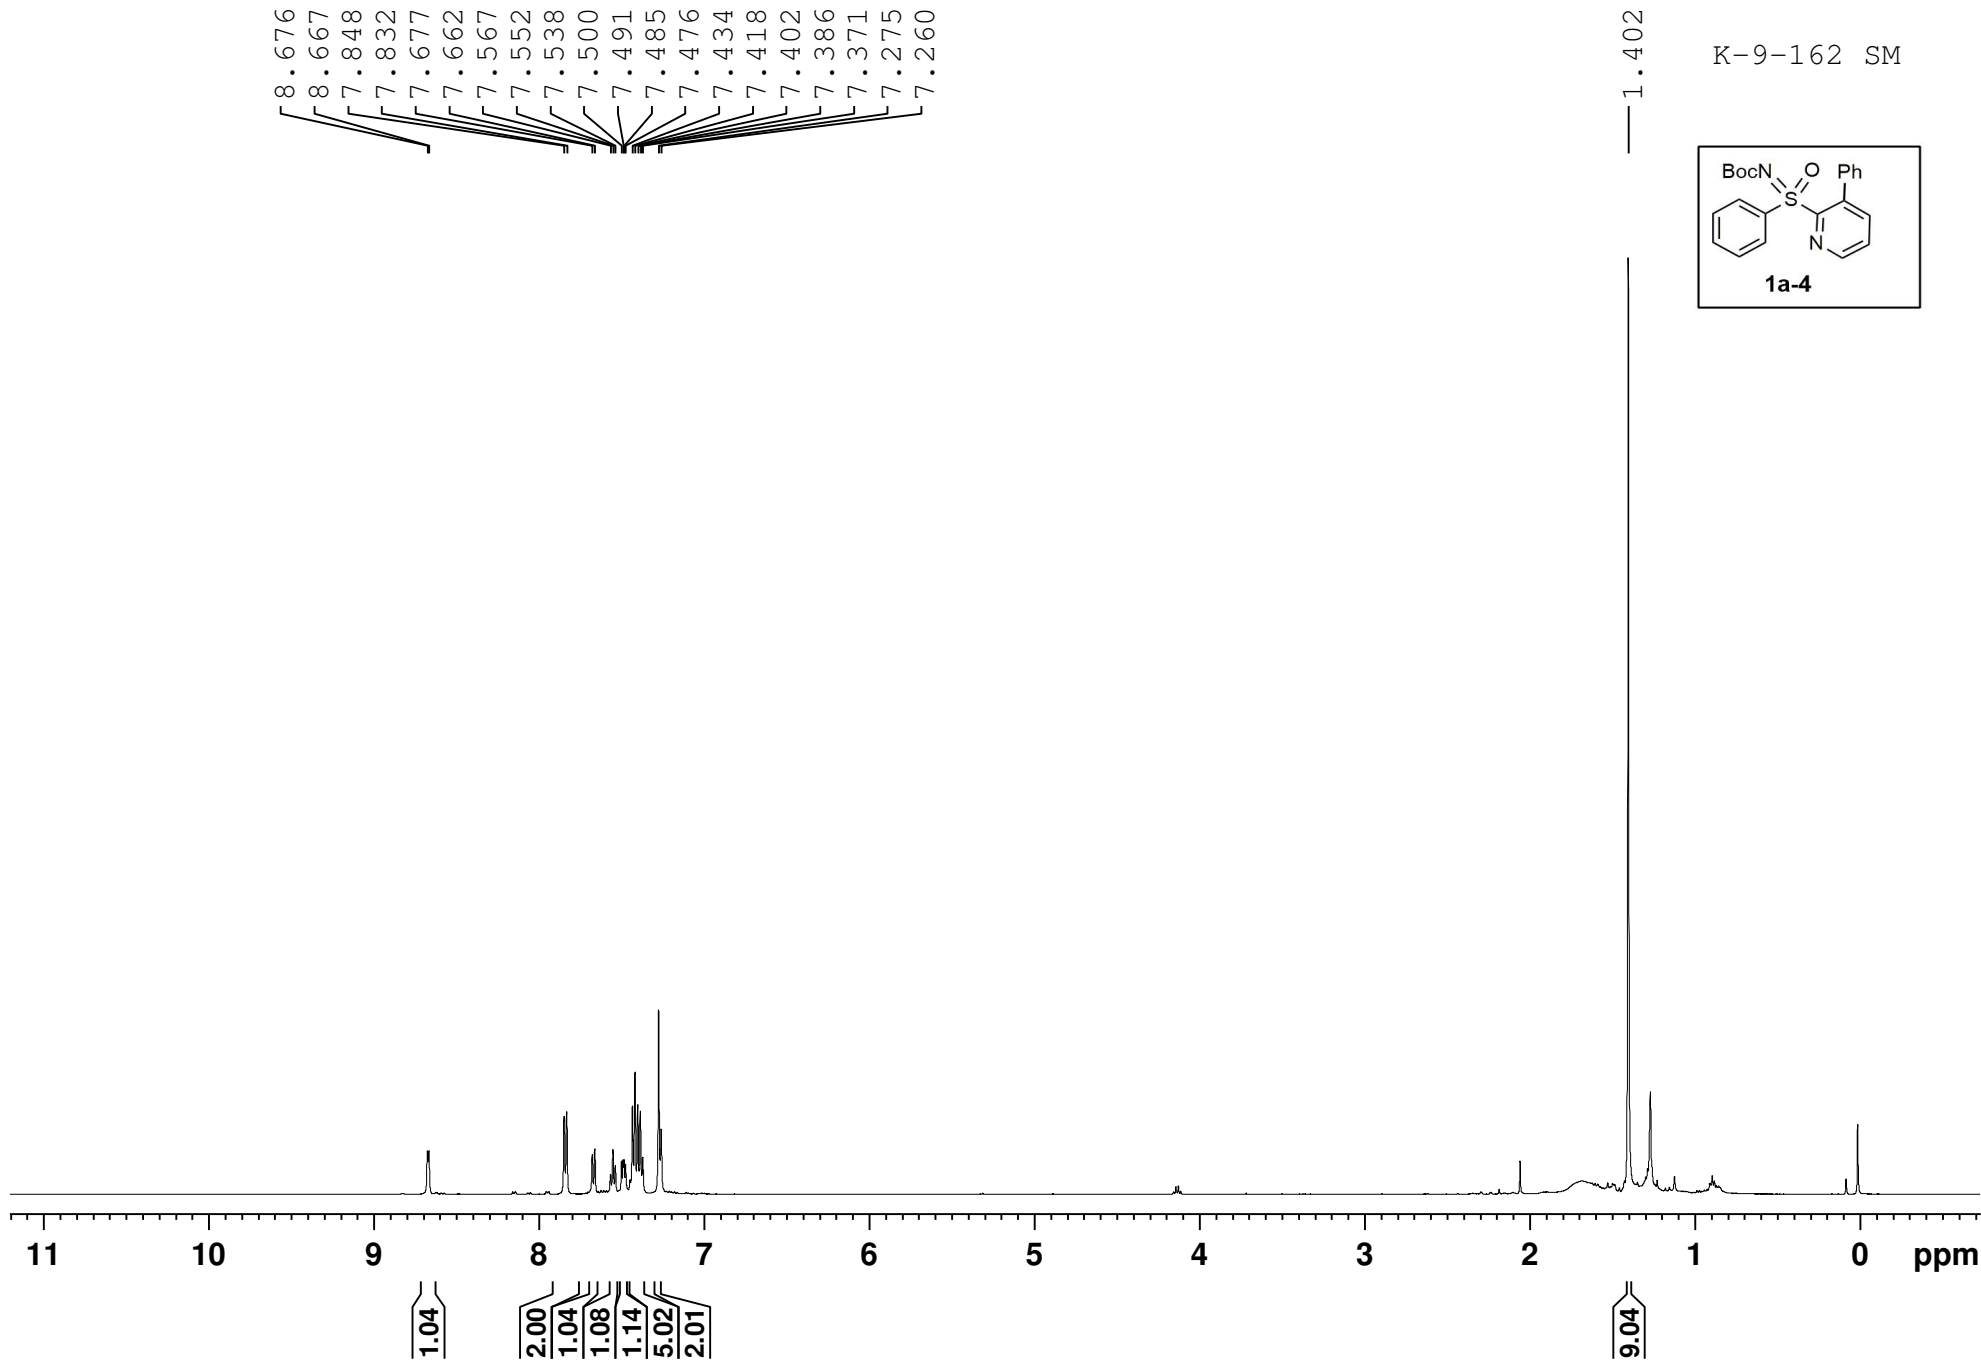



K-9-162 SM

157.37  
154.78  
148.00  
141.69  
138.88  
137.62  
136.23  
133.29  
129.34  
129.22  
128.65  
128.34  
127.70  
126.11

80.35  
77.25  
77.00  
76.74

28.03

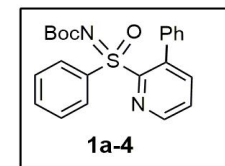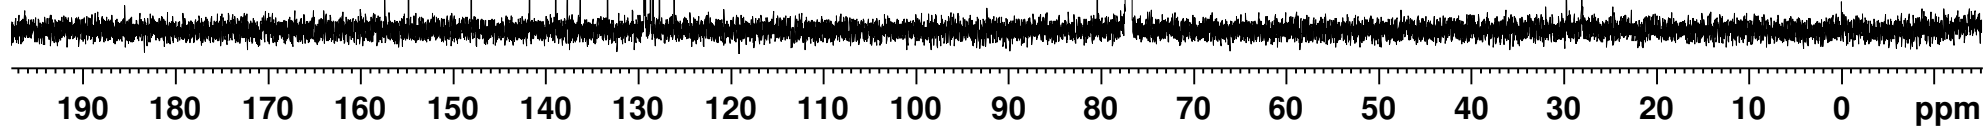

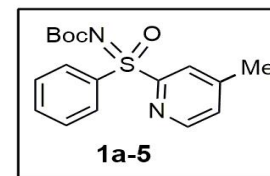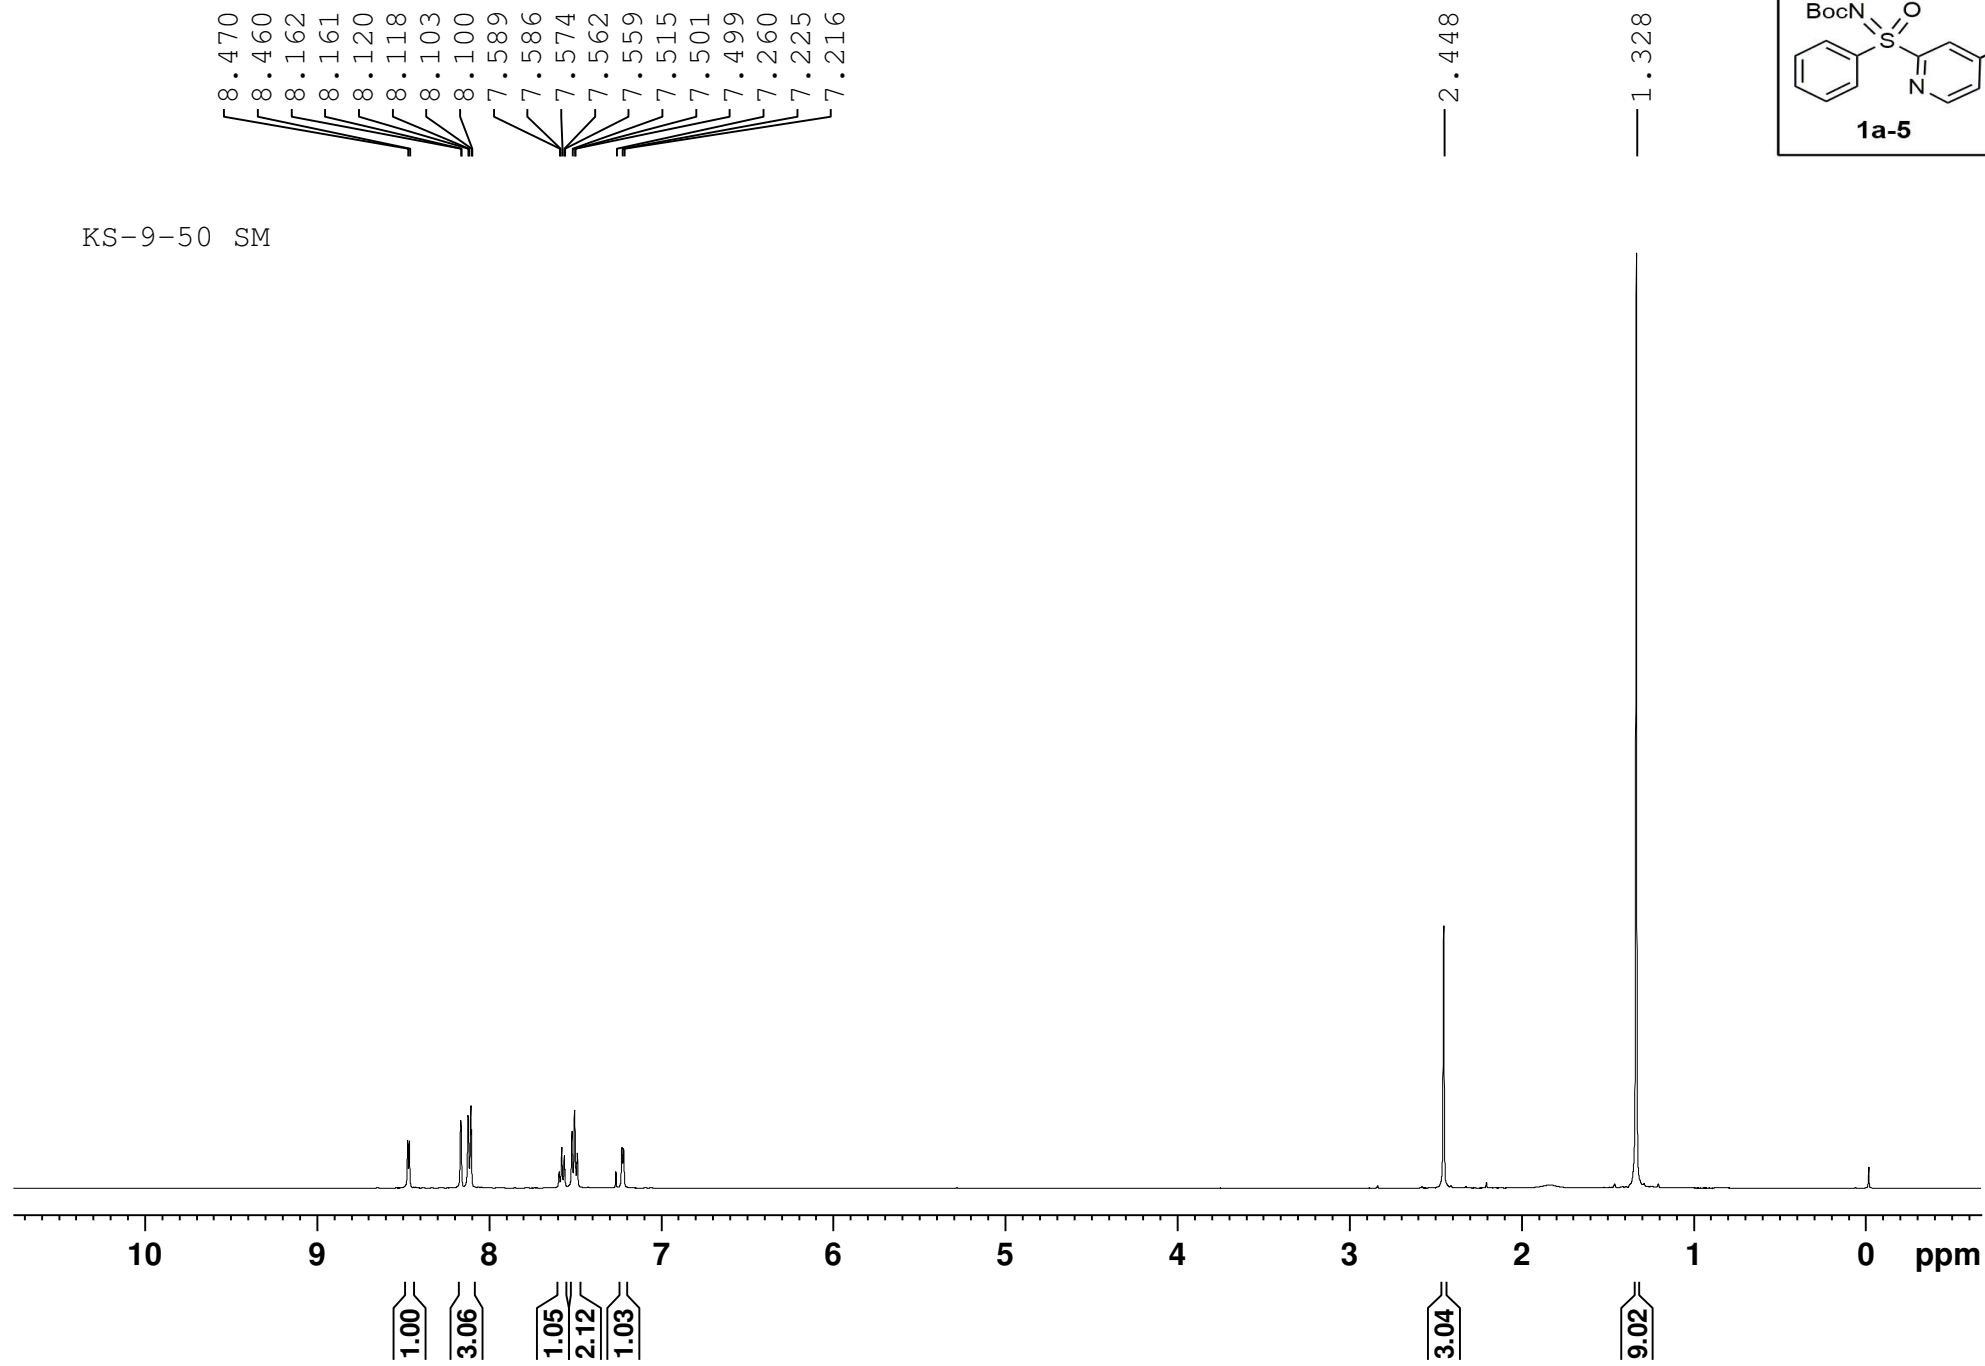

KS-9-50 SM

KS-9-50 SM

157.66  
157.44

150.07  
150.00

136.97  
133.52  
129.03  
128.96  
127.44  
124.10

80.56  
77.25  
77.00  
76.75

27.87

21.22

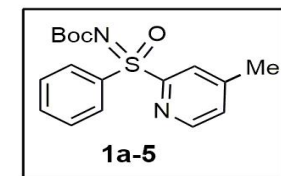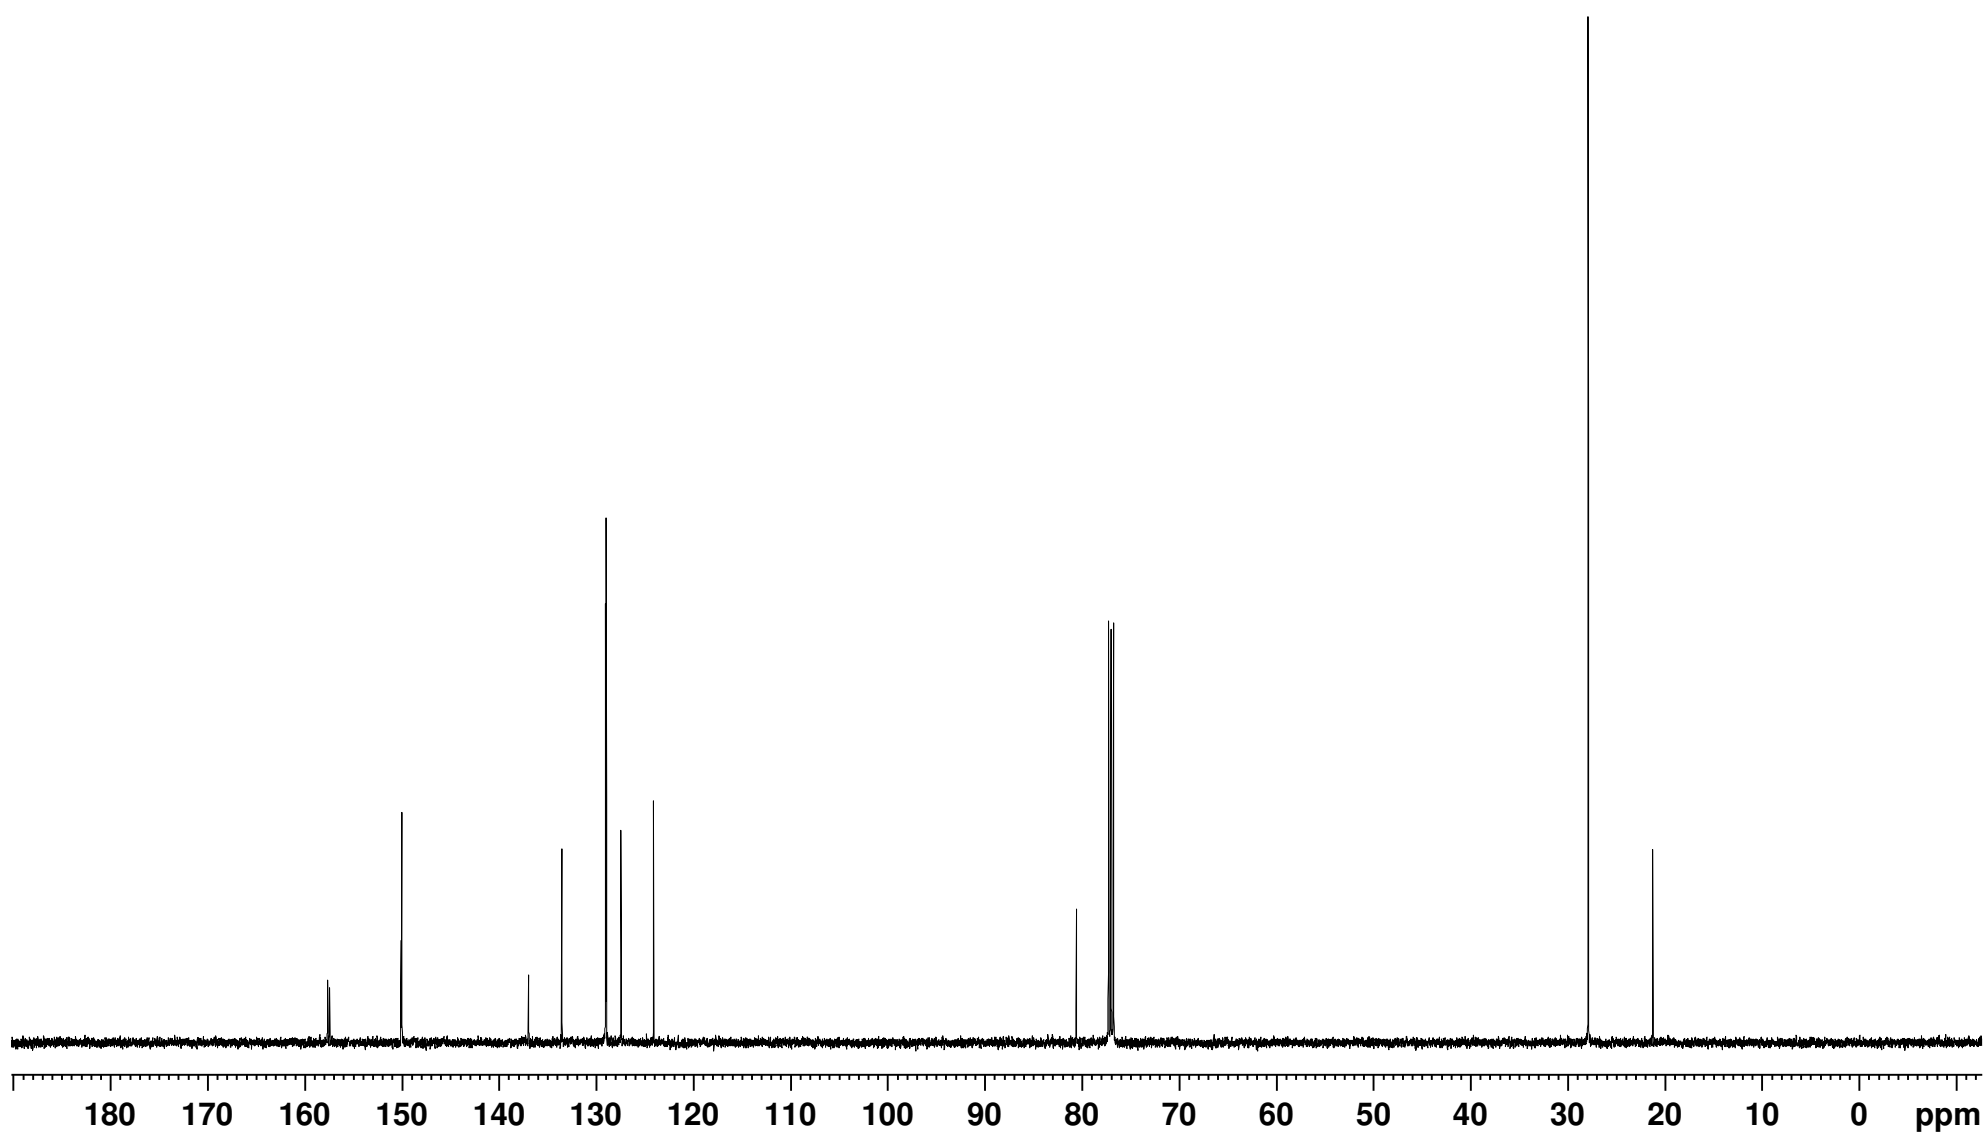

KS-9-49 SM

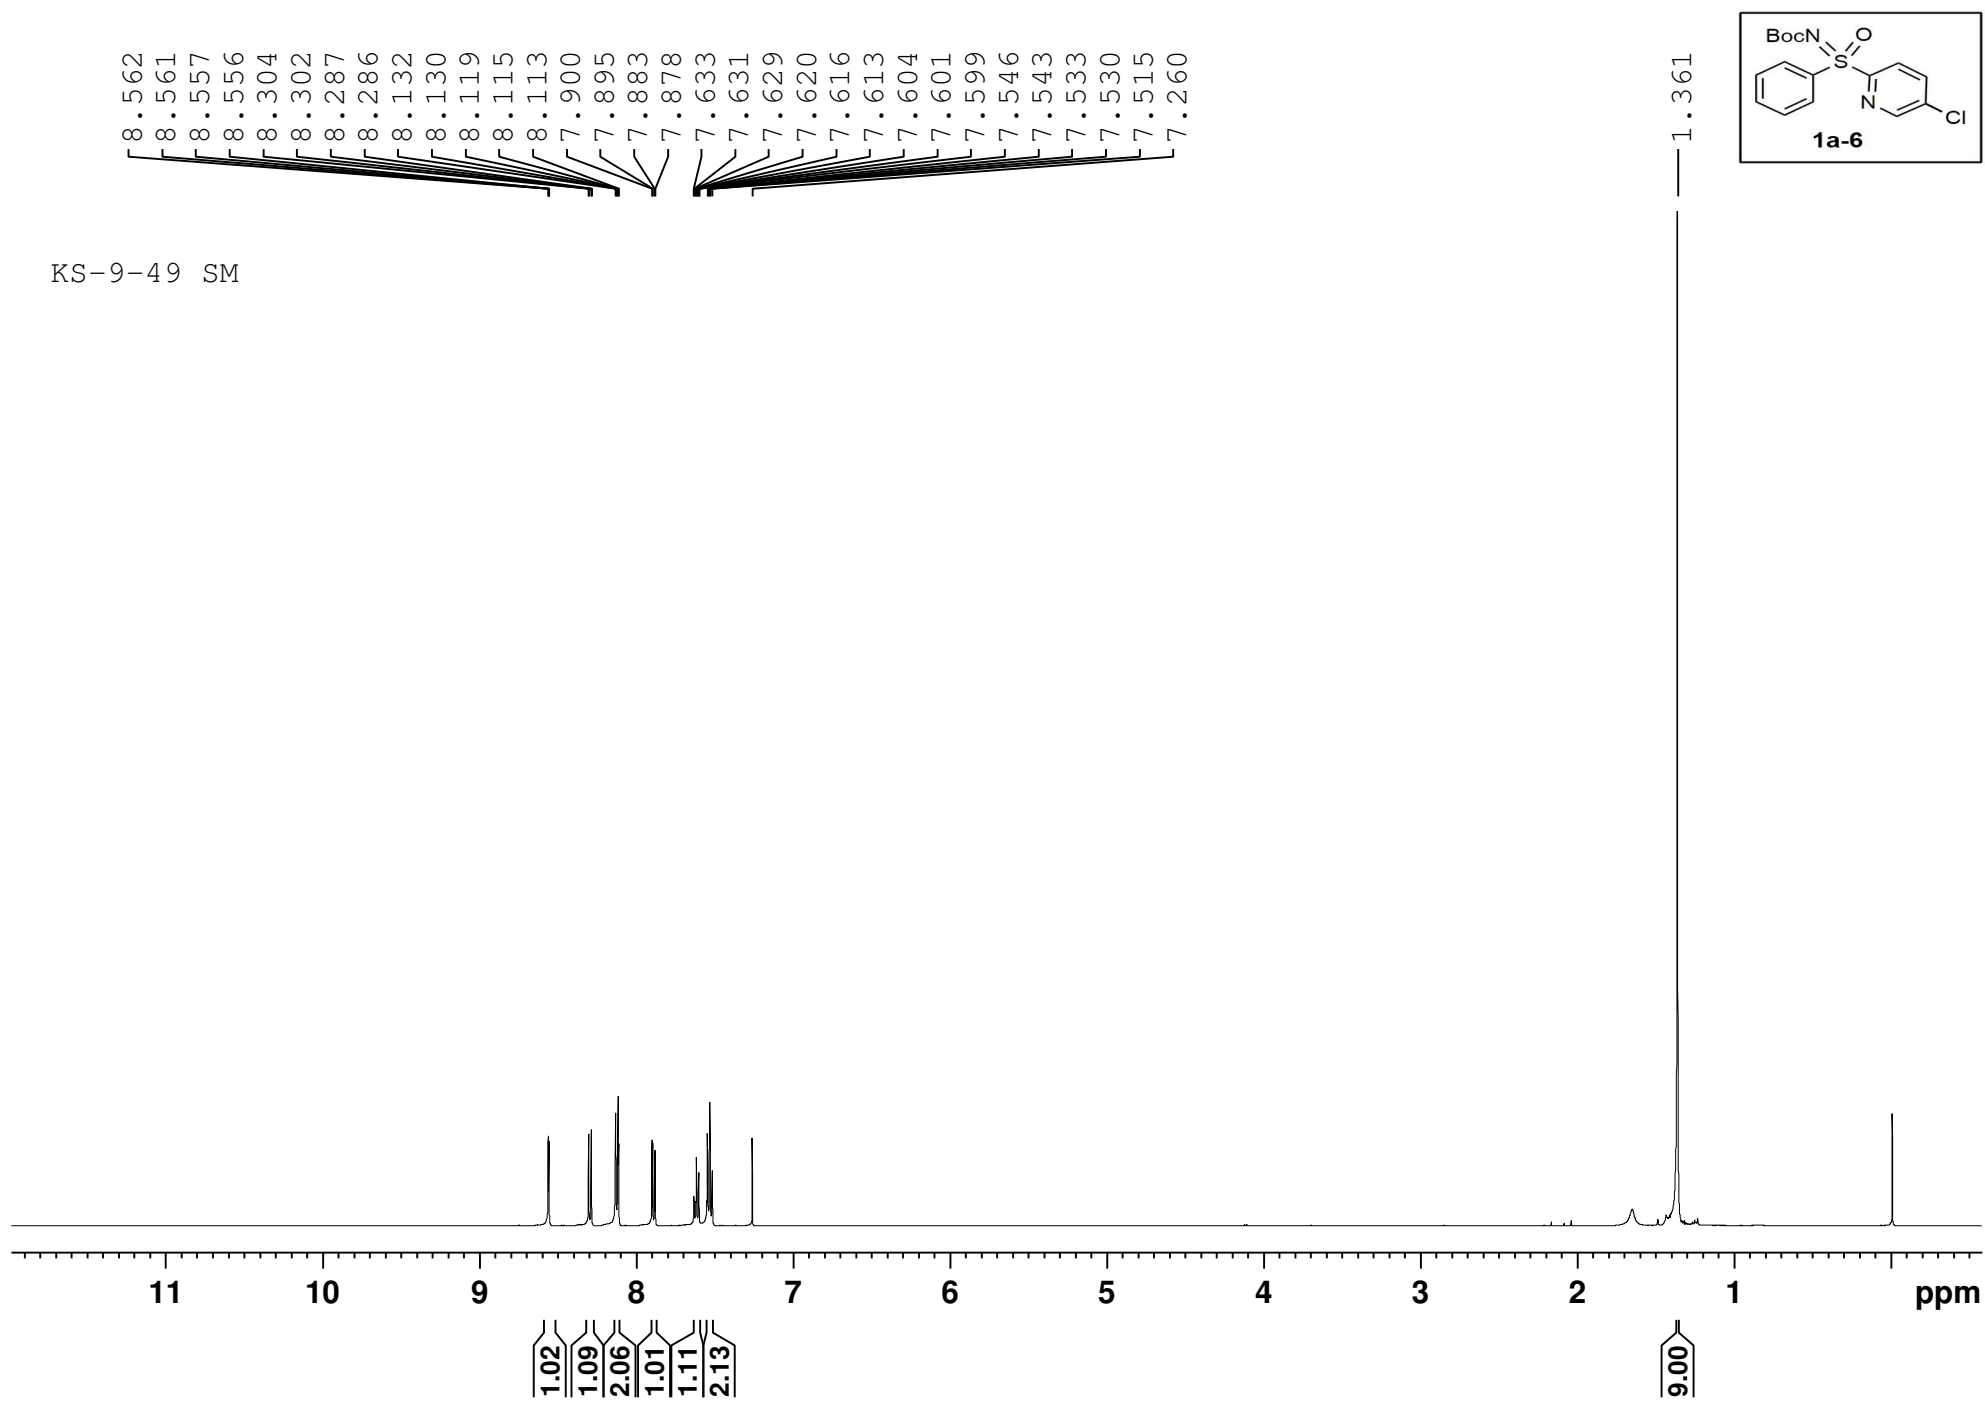

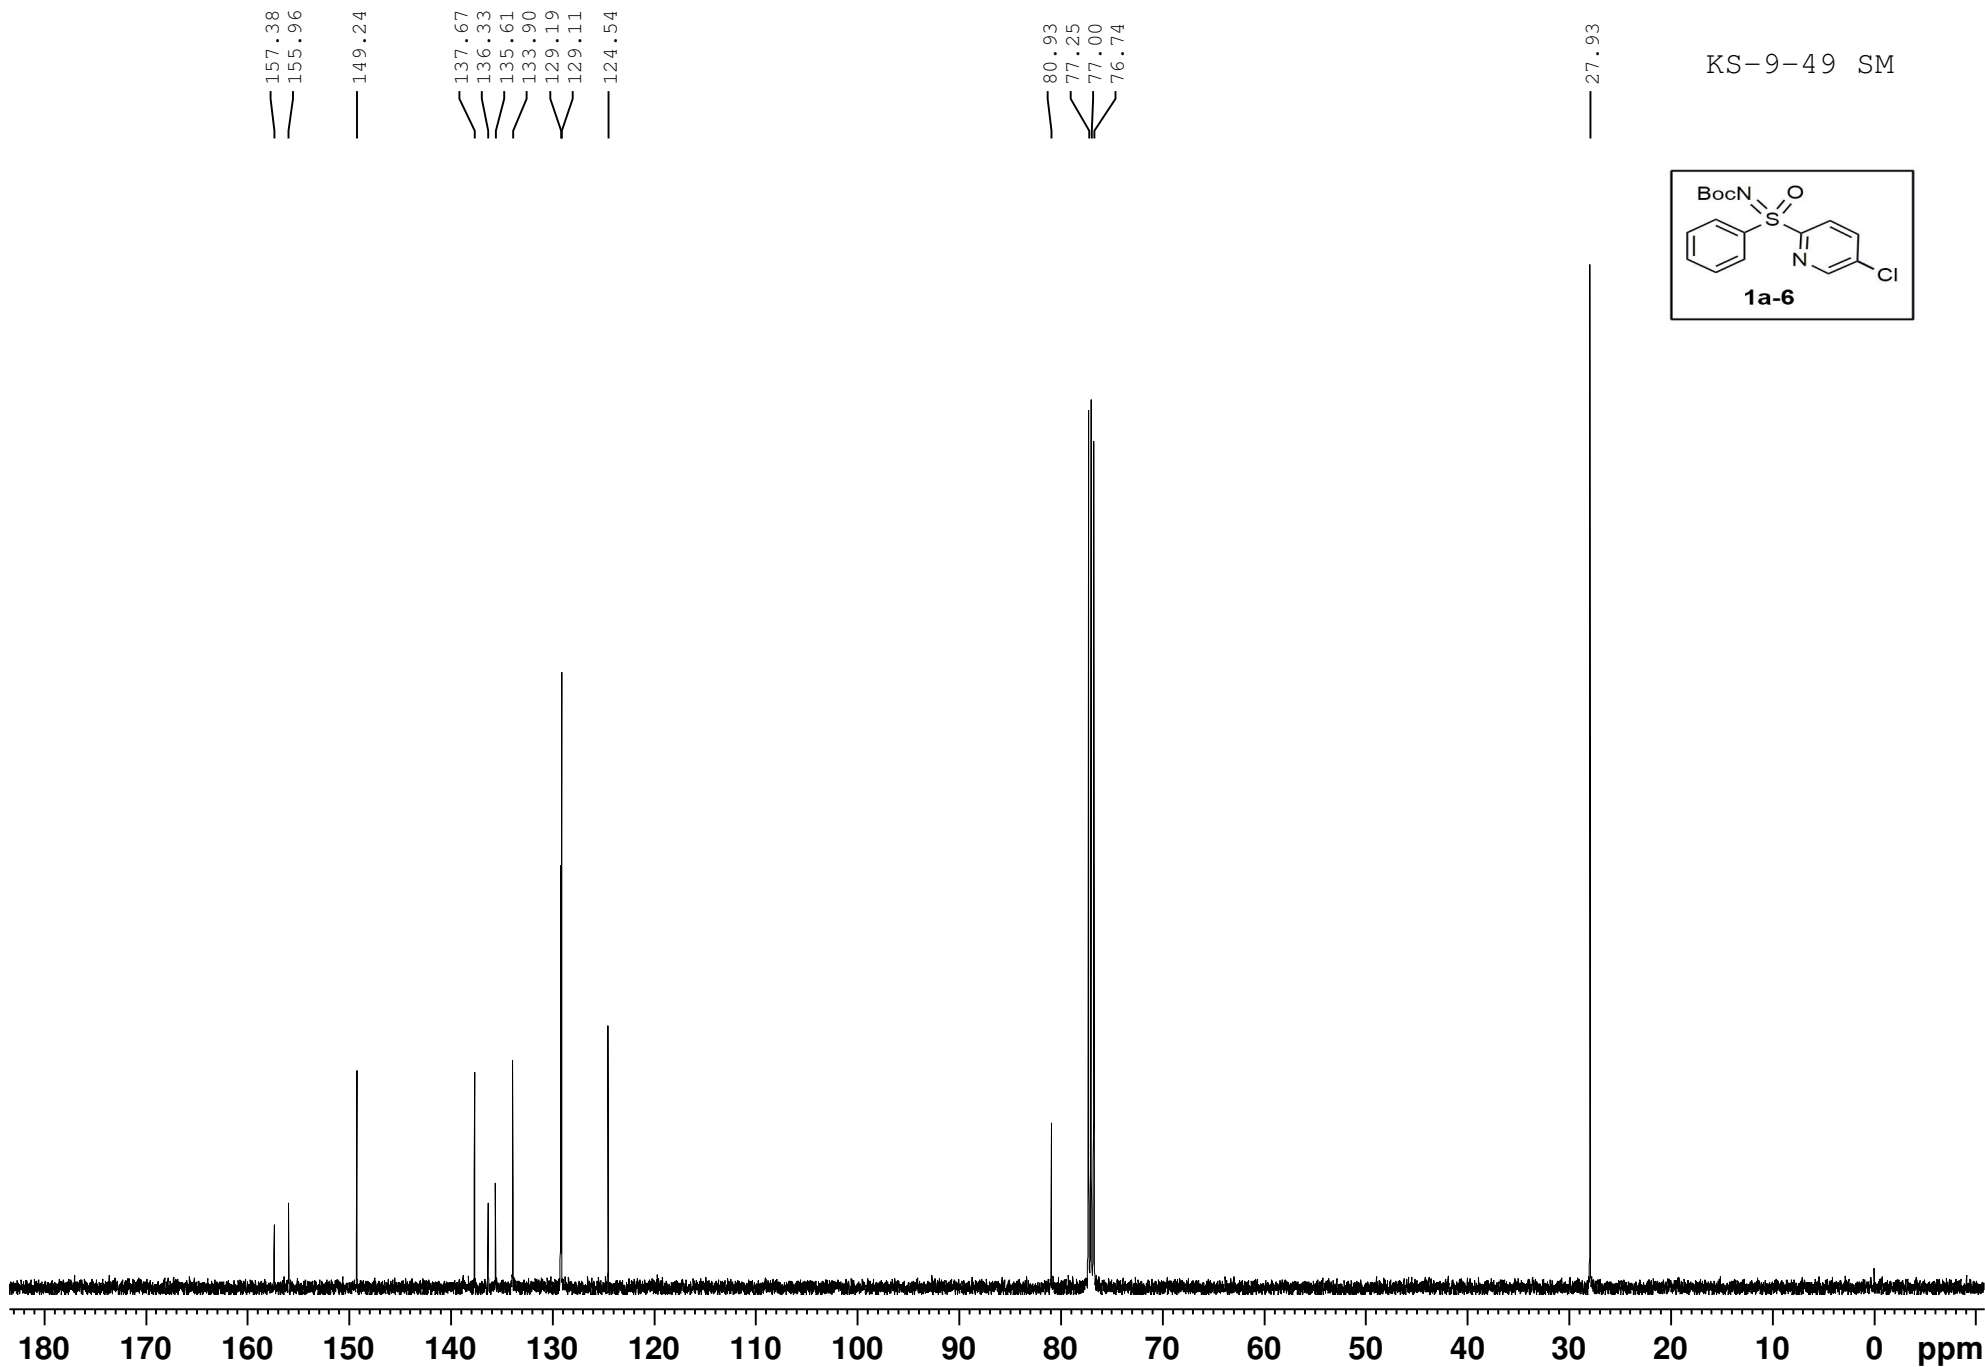

KS-9-49 SM

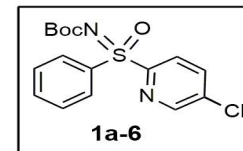

K-9-43 SM

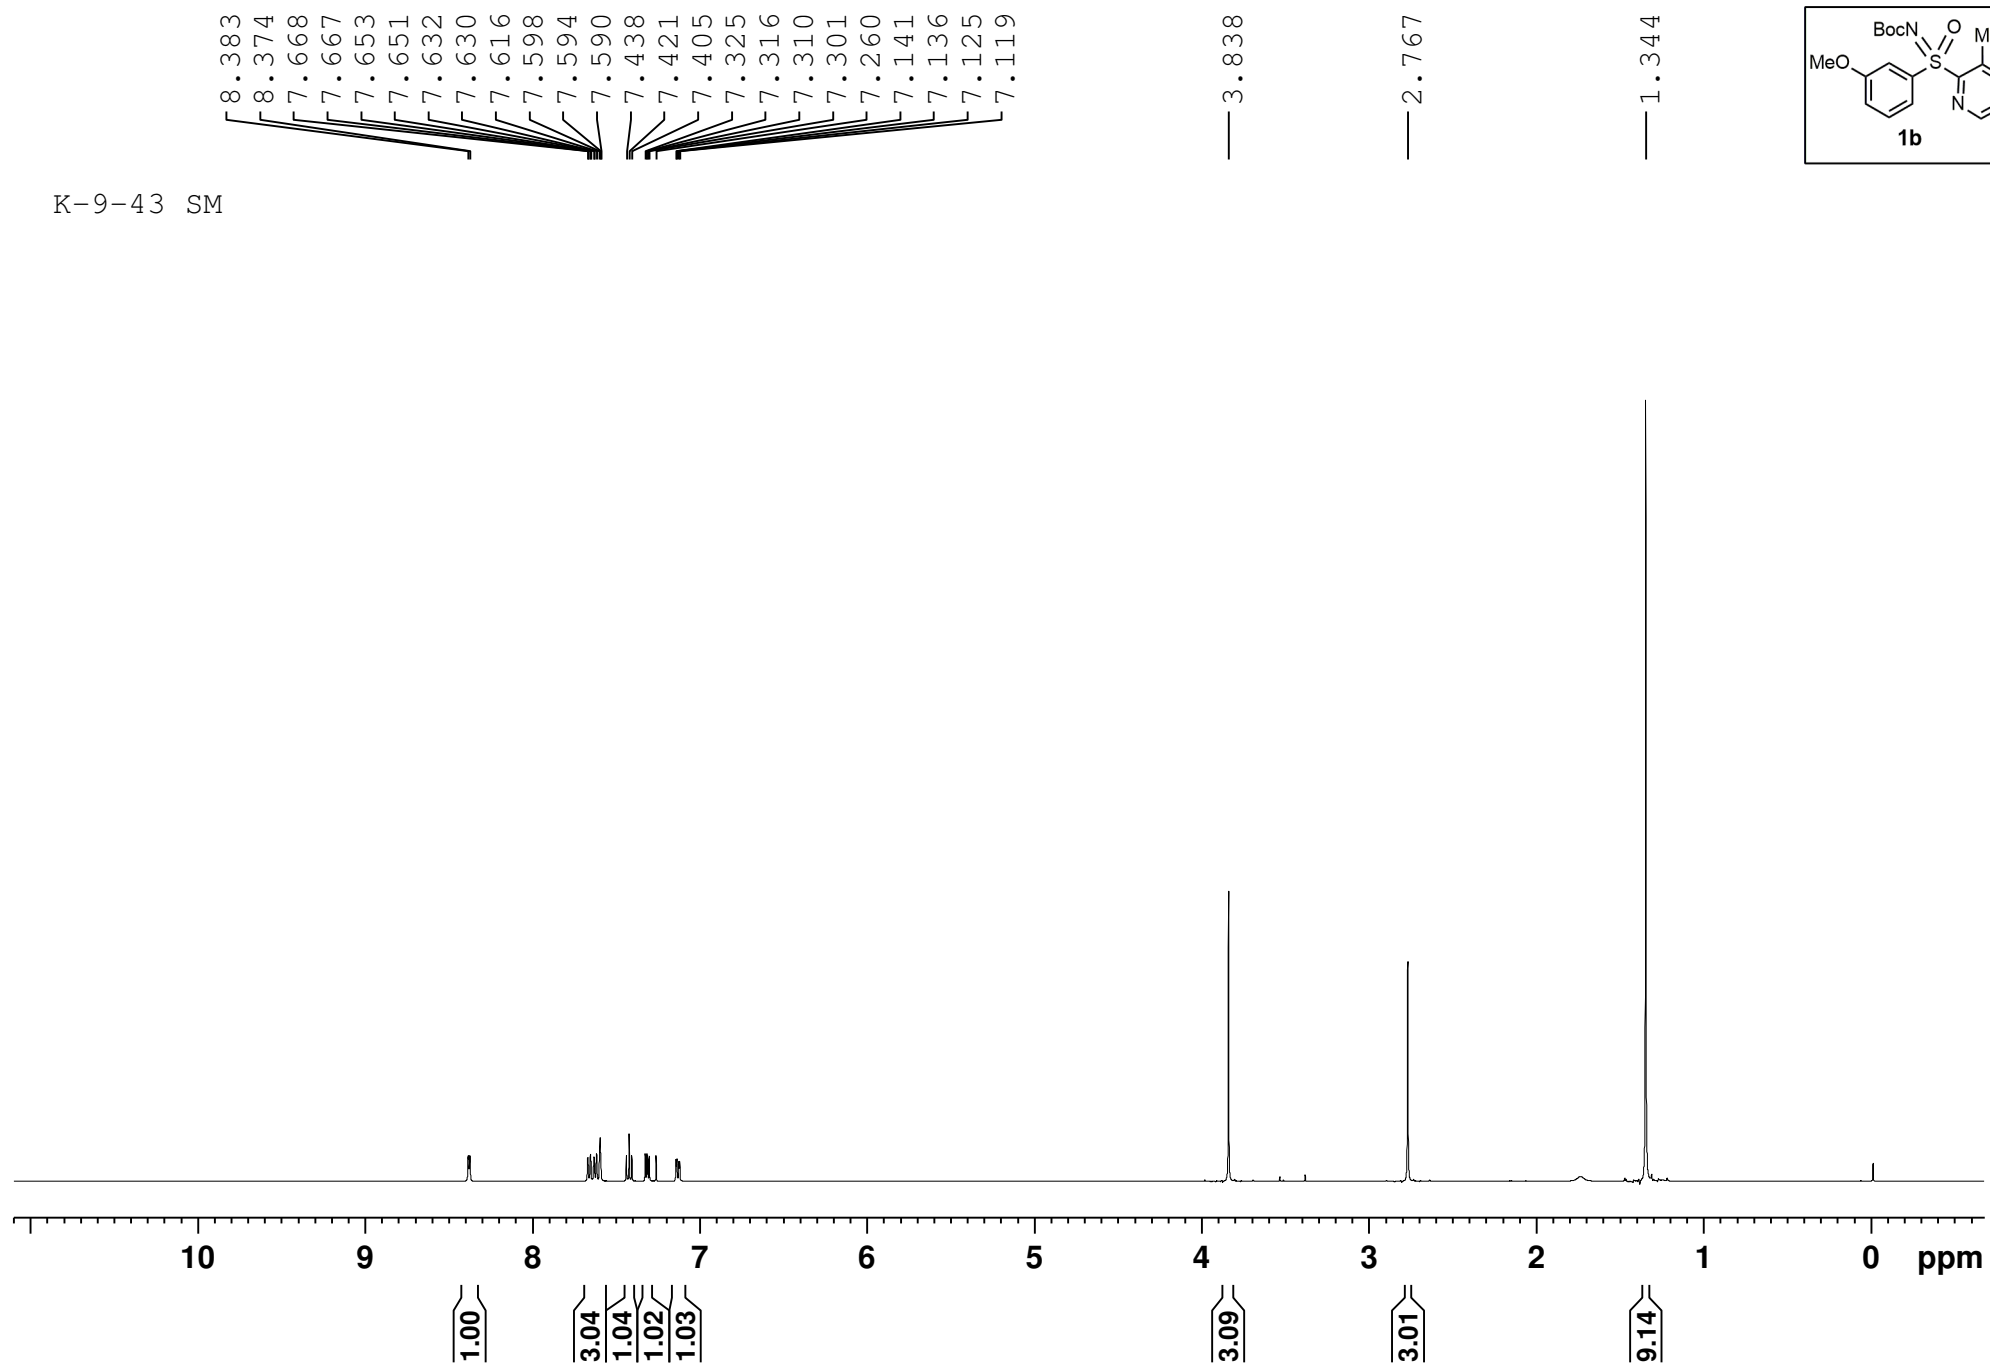

K-9-43 SM

159.78  
157.47  
155.28  
146.43  
141.69  
138.28  
134.99  
129.76  
126.53  
121.54  
120.23  
113.70

80.42  
77.25  
77.00  
76.74

55.72

27.91

19.20

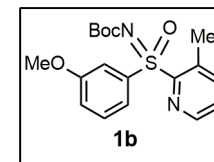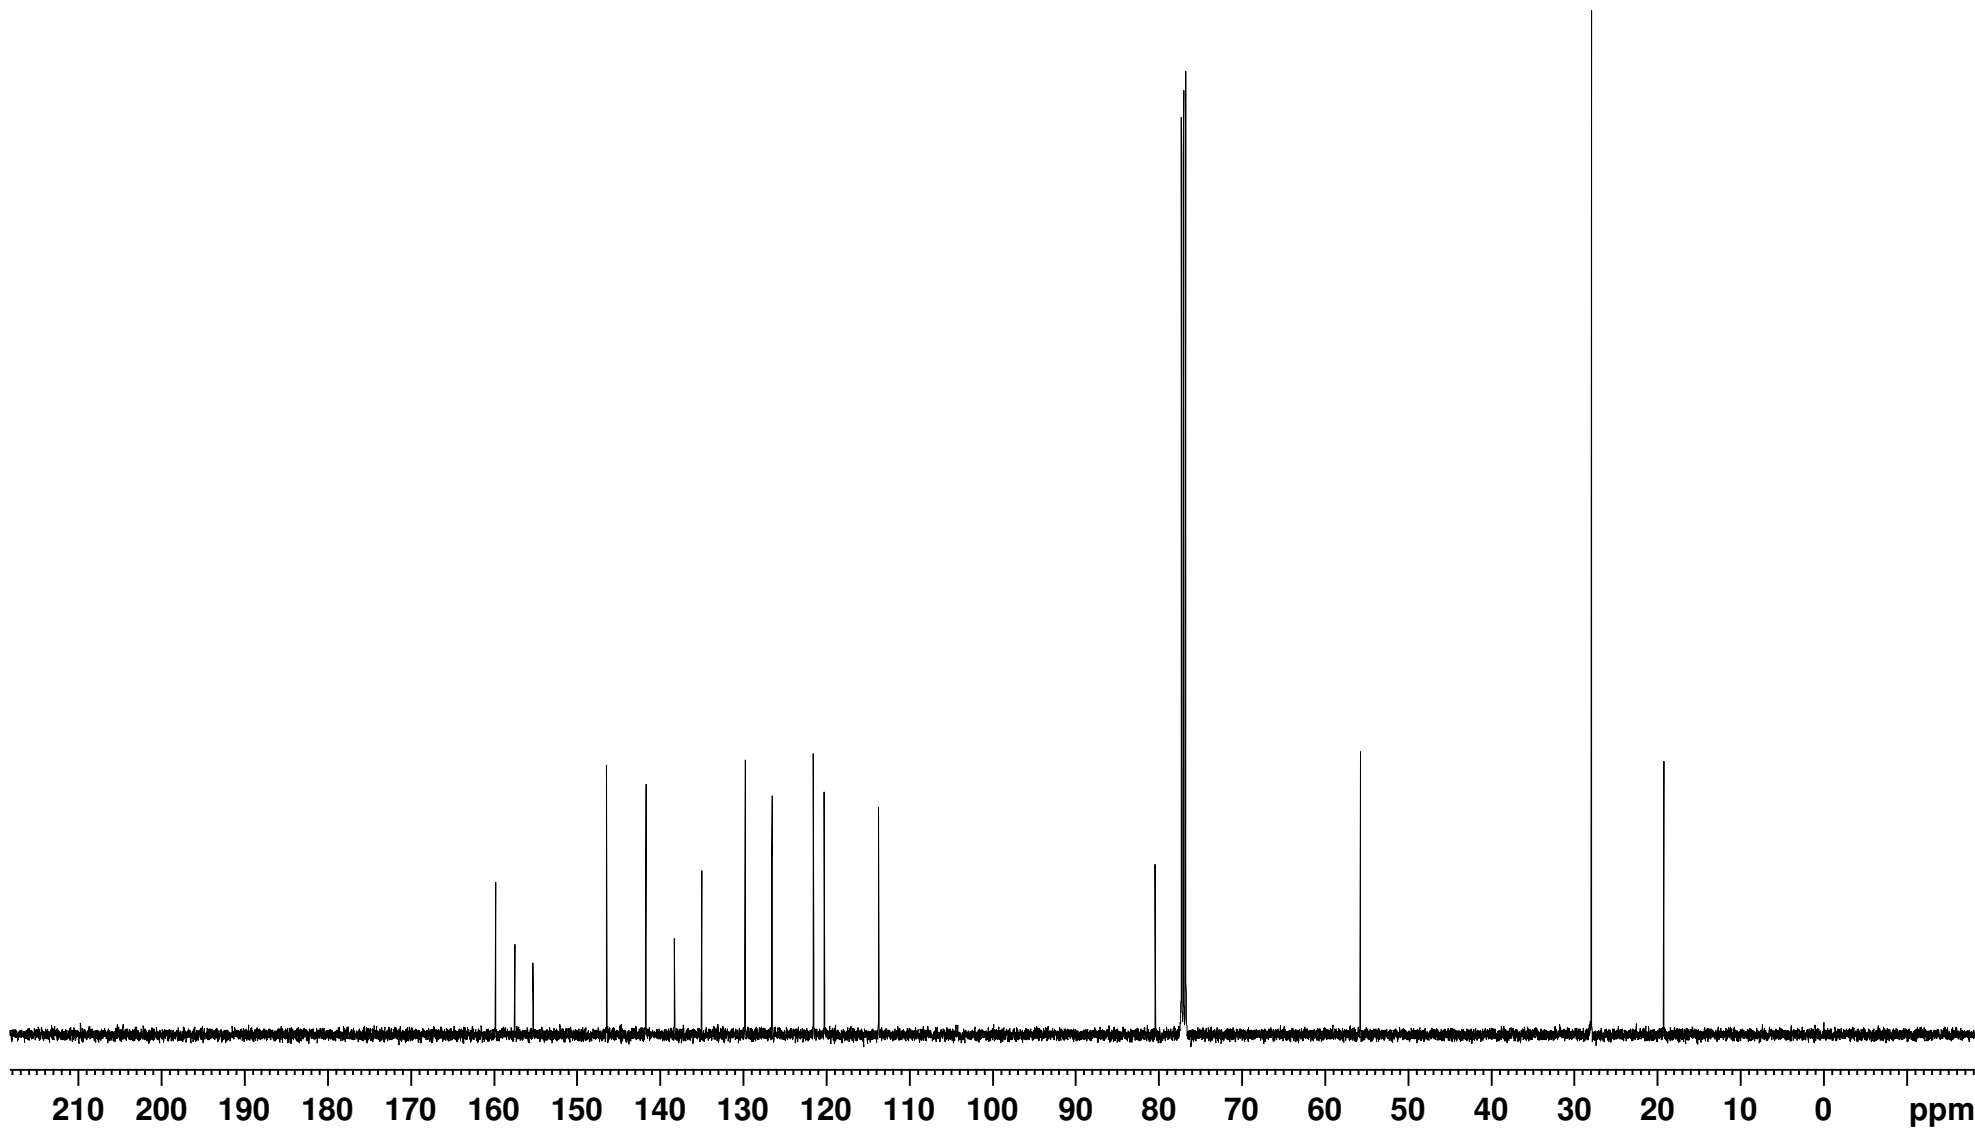

KS-9-O-F

8.499  
8.496  
7.761  
7.749  
7.747  
7.665  
7.662  
7.545  
7.538  
7.528  
7.524  
7.521  
7.443  
7.434  
7.432  
7.426  
7.418  
7.410  
7.402  
7.400  
7.260  
7.145  
7.129

3.836

1.368

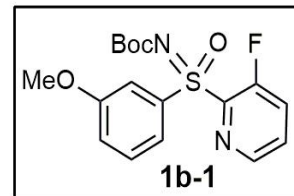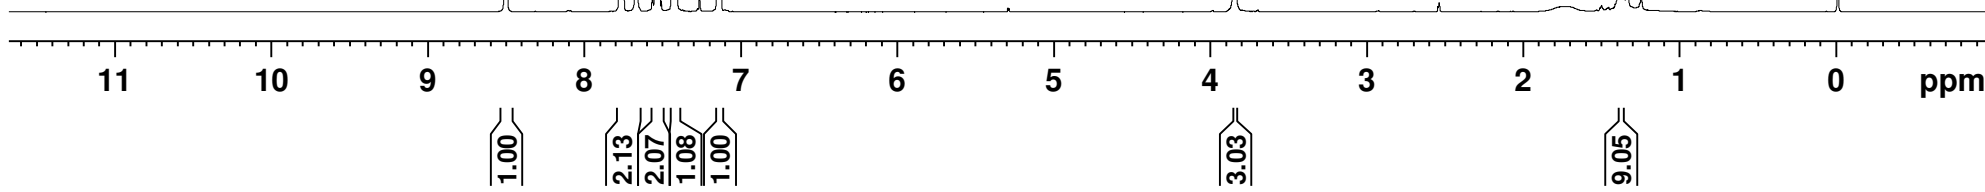



KS-9-0-F

160.03  
157.86  
157.24  
155.71  
145.30  
145.26  
137.57  
130.21  
129.32  
126.43  
126.27  
121.28  
120.99  
113.14

80.91  
77.25  
77.00  
76.74

55.78

27.89

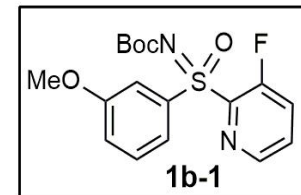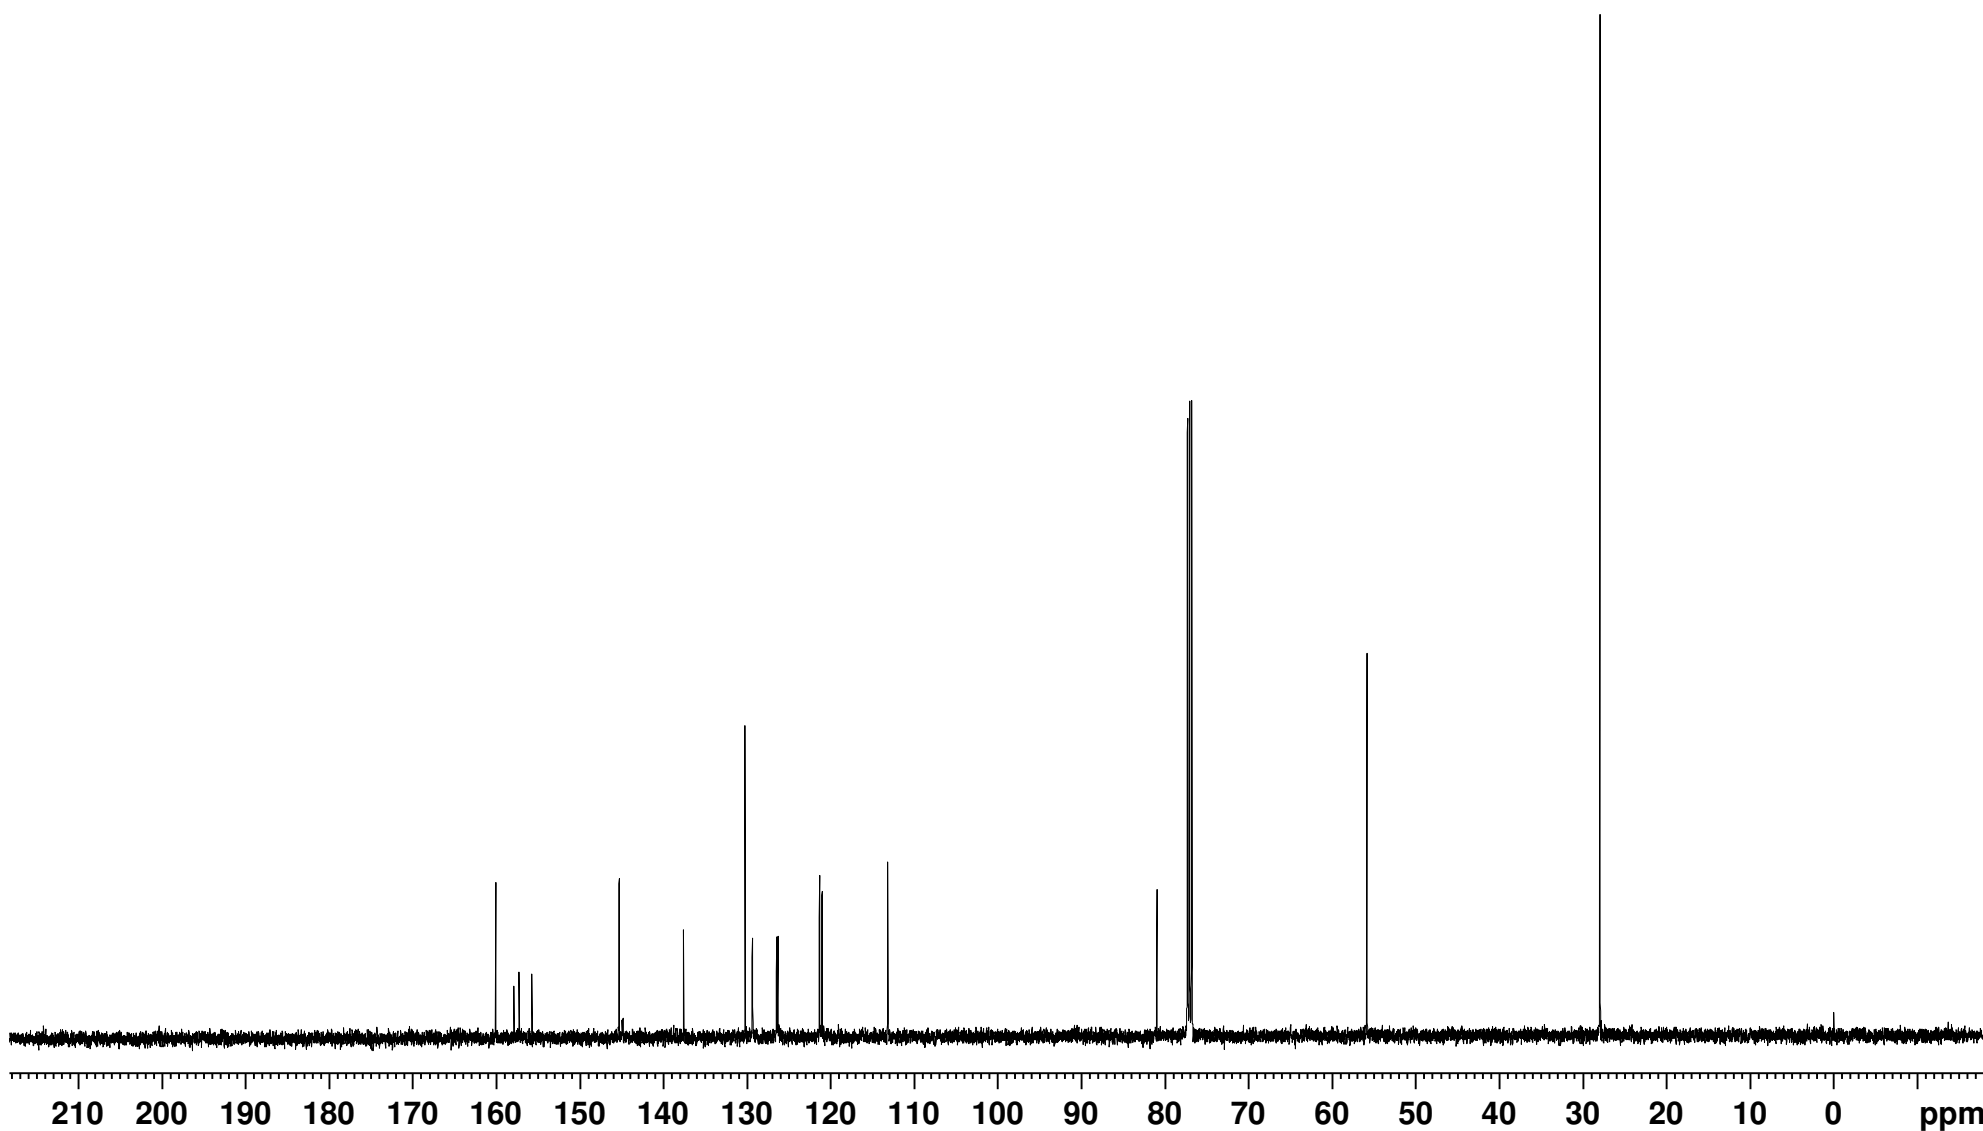

k-9-0-F

-114.02

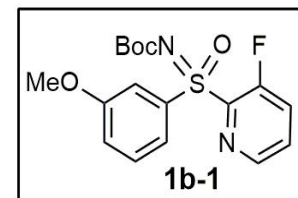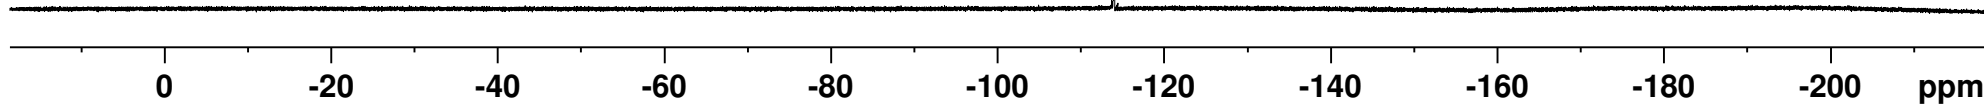

k-7-102

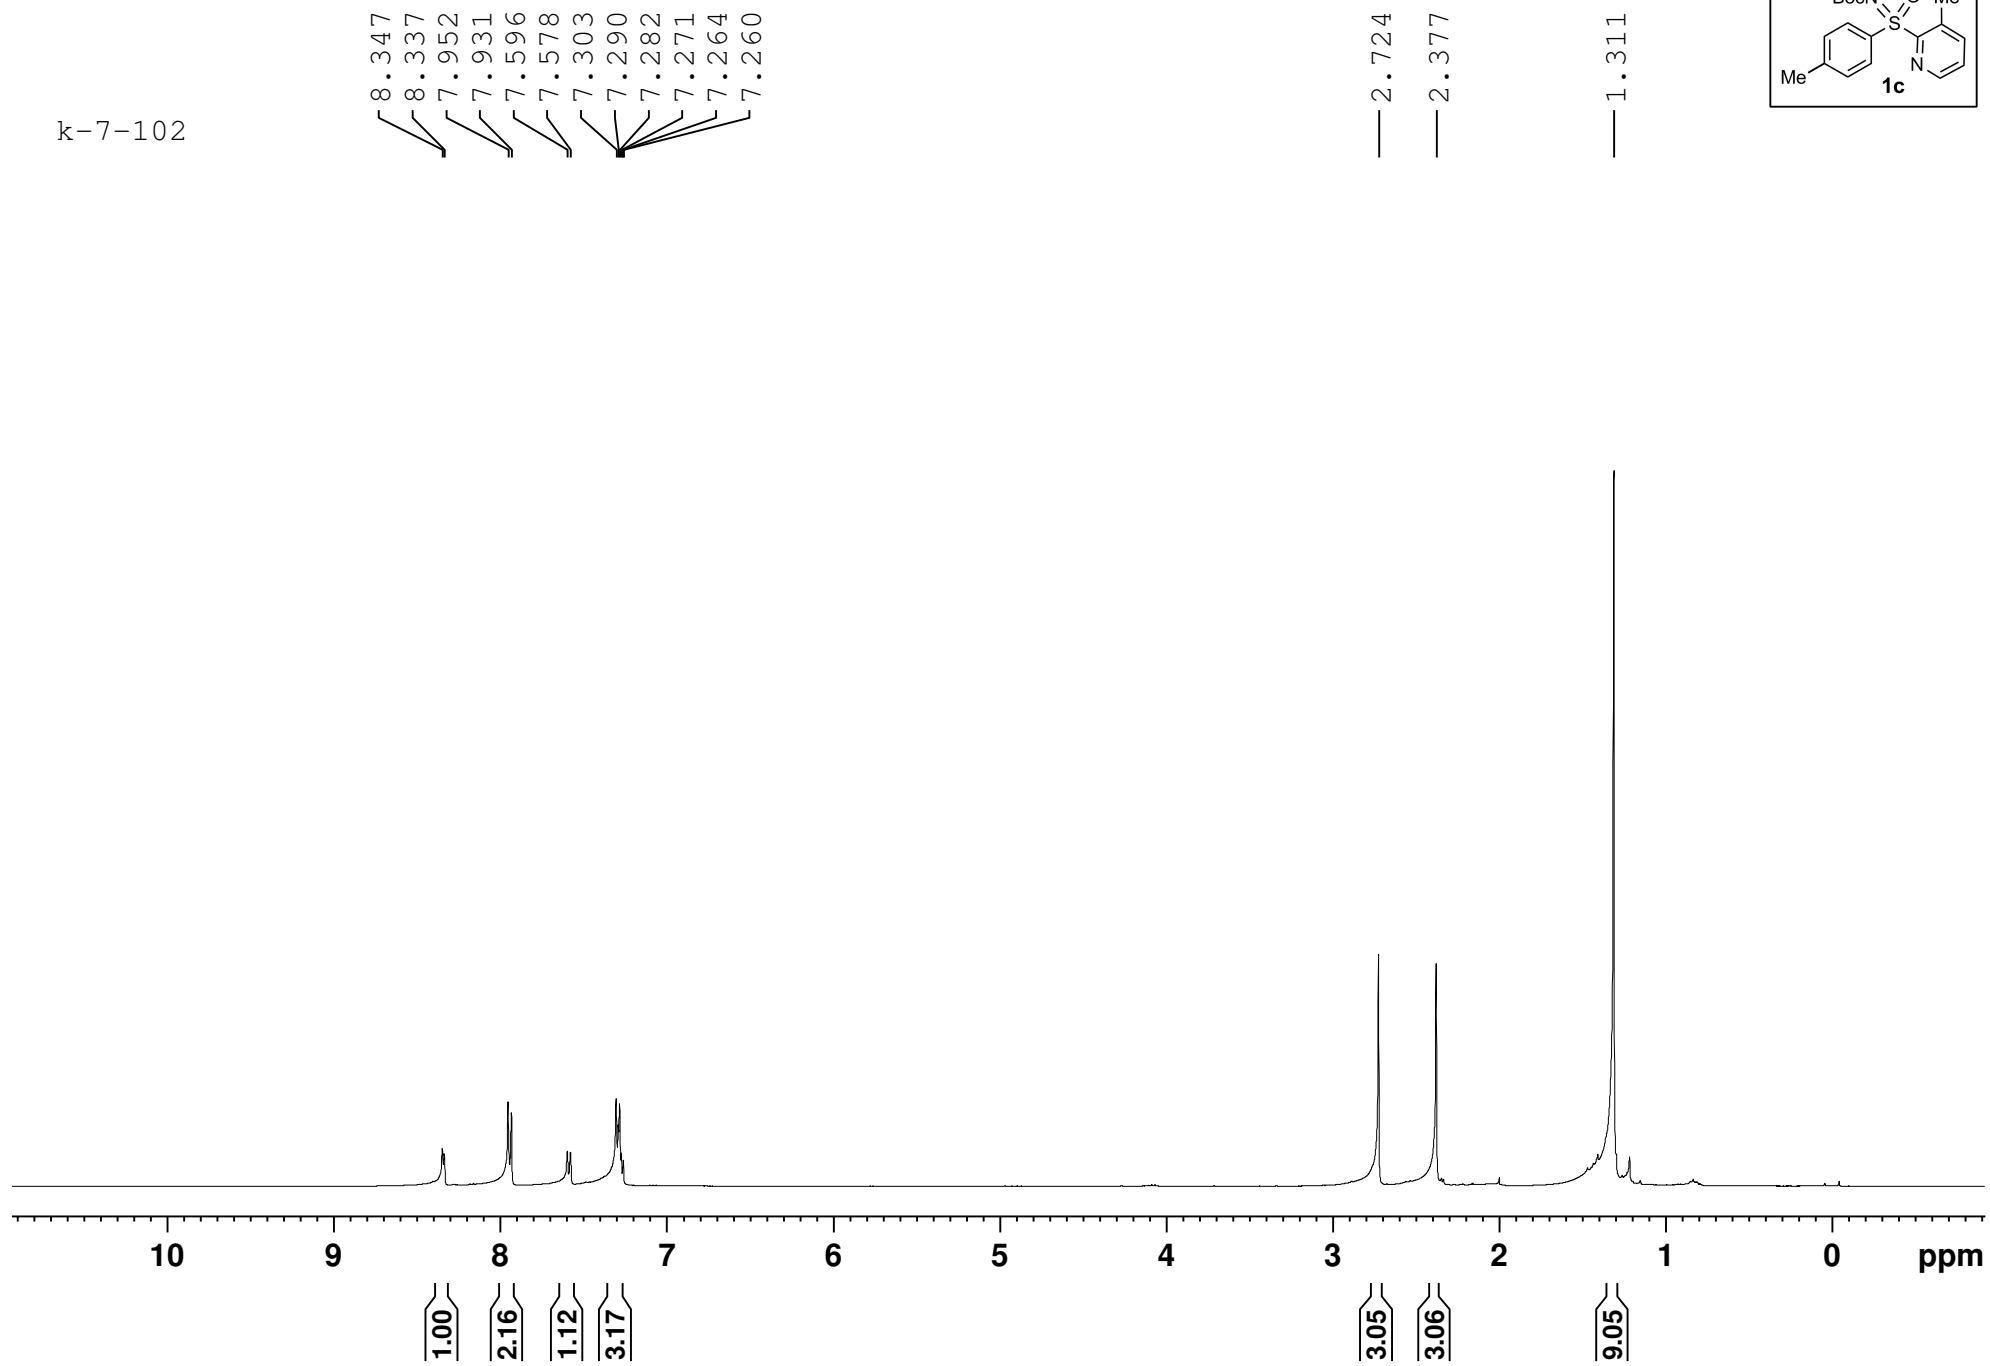

157.51  
155.29

146.32  
144.48  
141.58

134.75  
133.74  
129.45  
129.15  
126.37

80.16  
77.32  
77.00  
76.68

27.79

21.46  
19.10

K-7-102

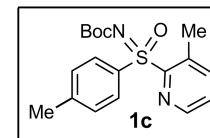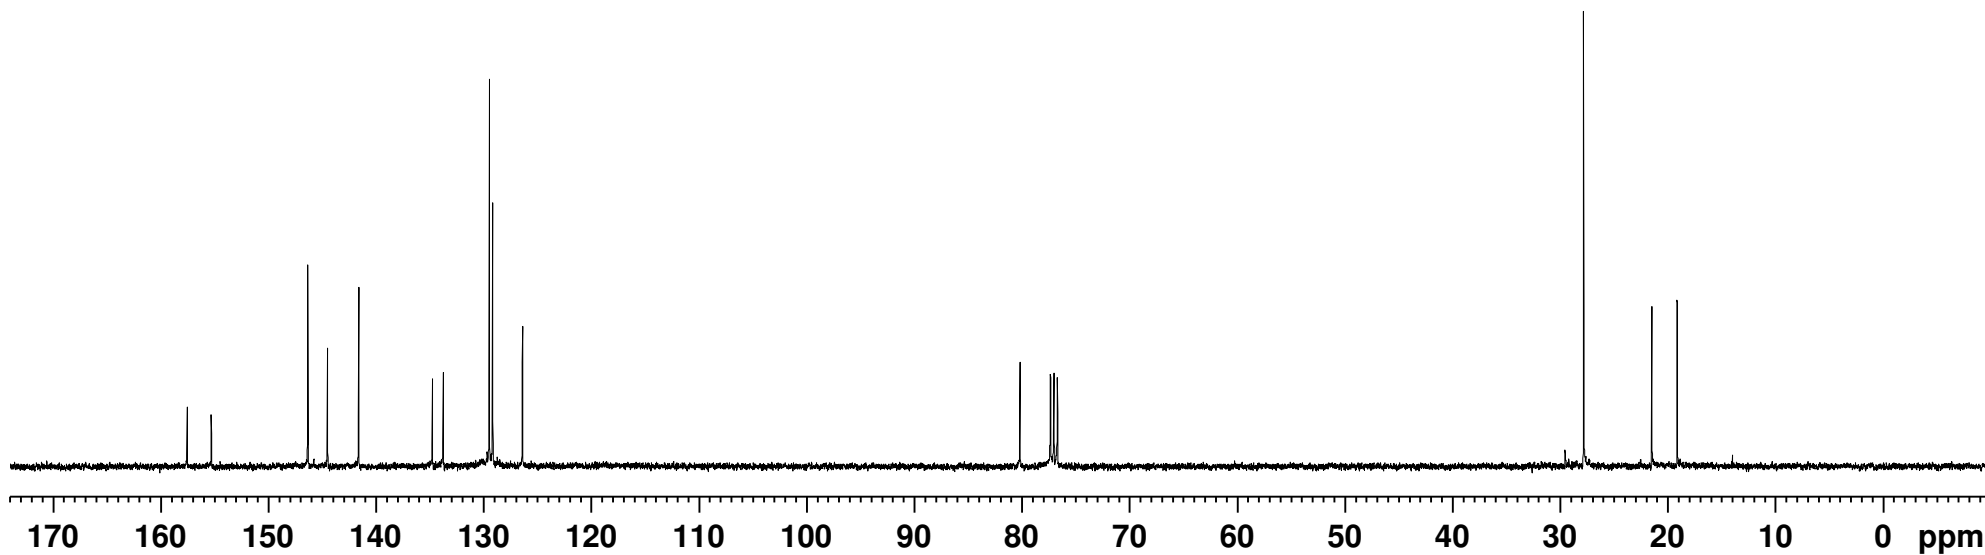

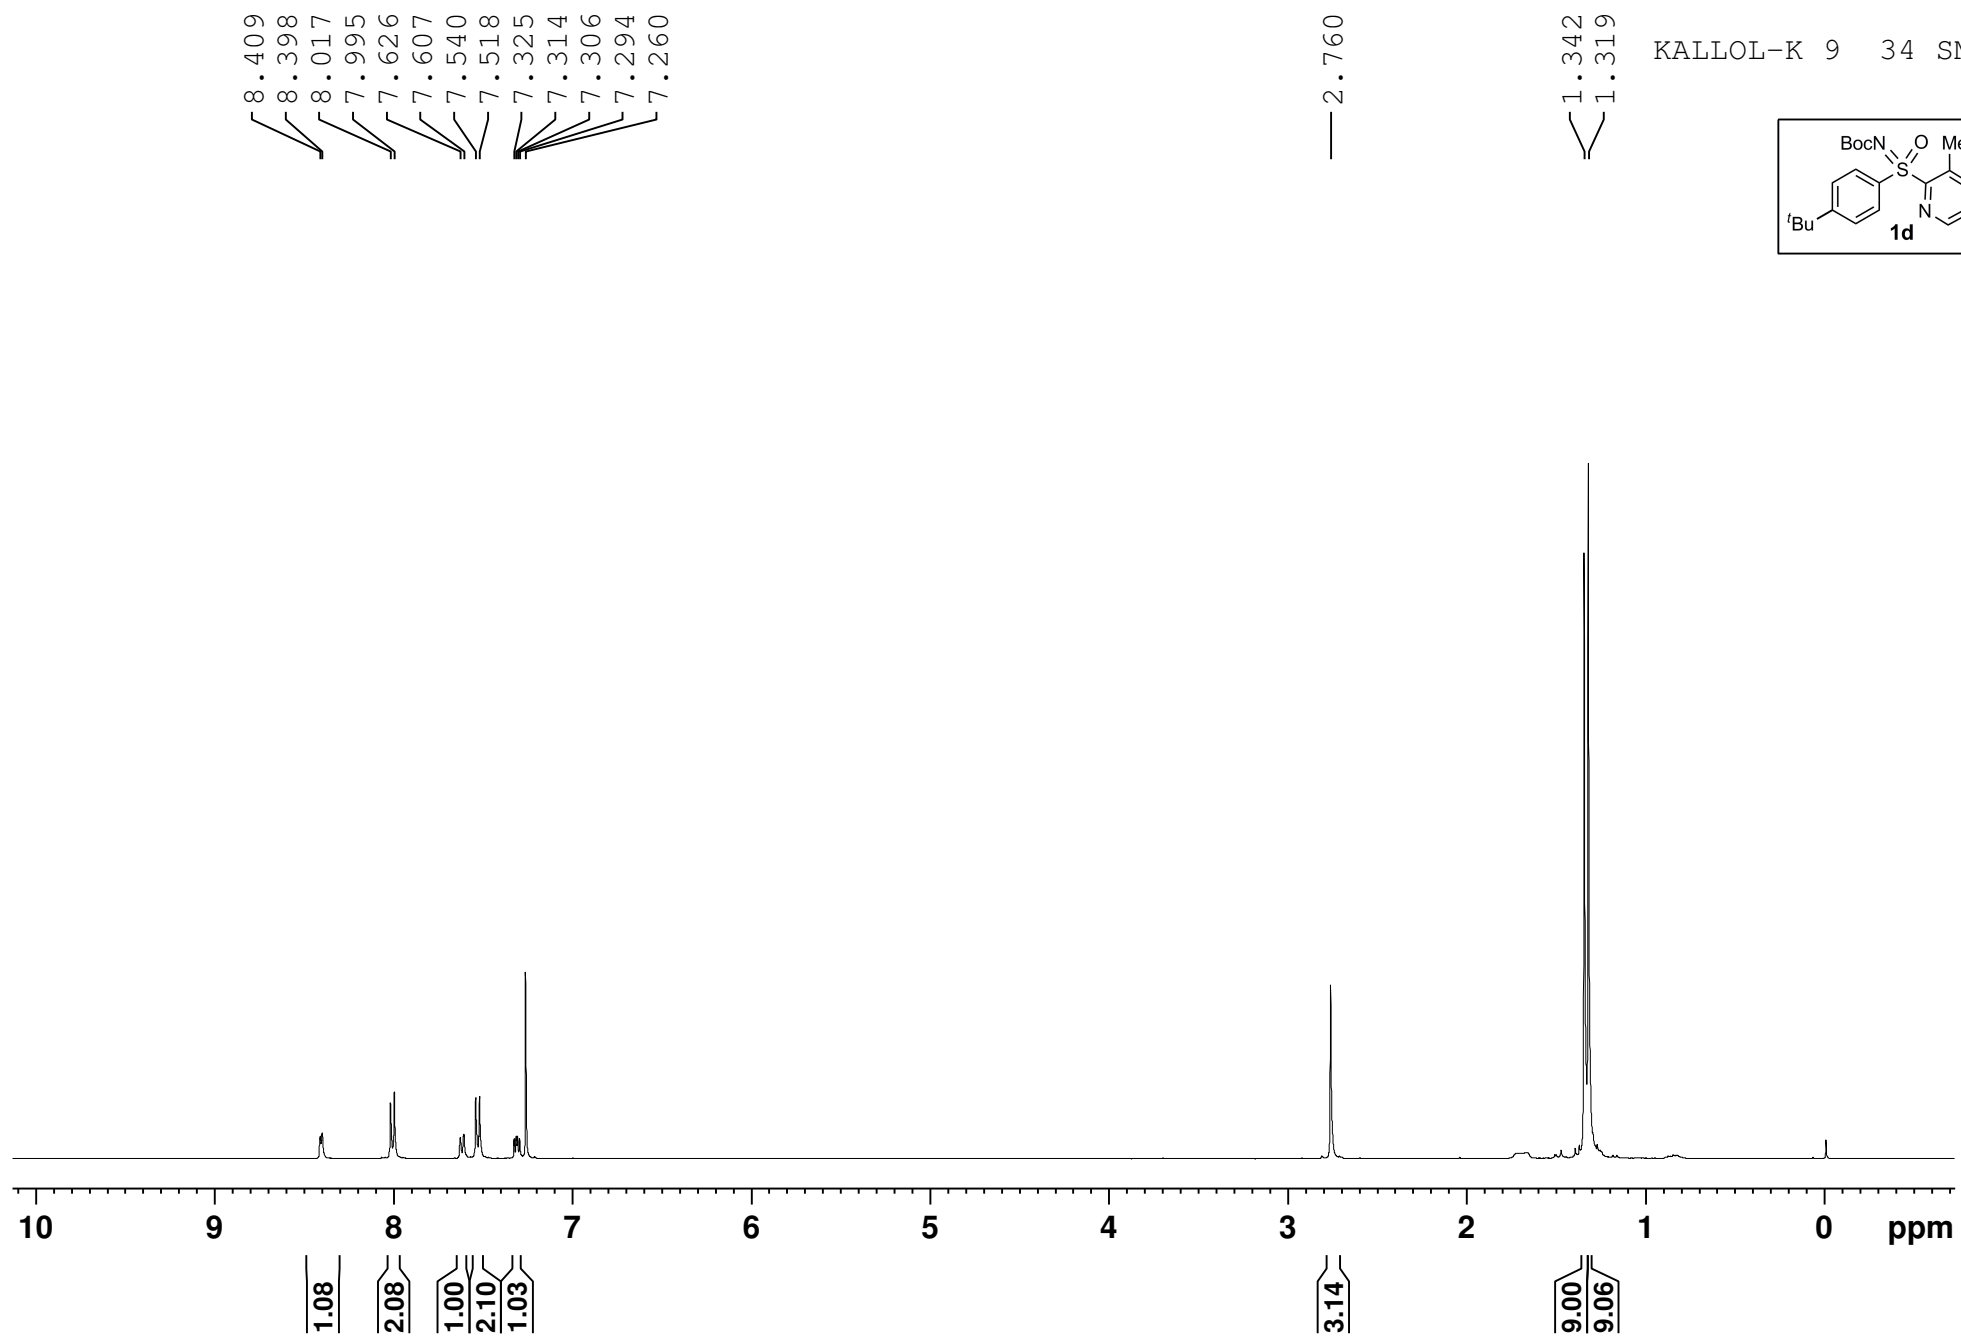

157.60  
157.44  
155.47  
146.48  
141.65  
134.95  
133.87  
129.09  
126.42  
125.95

80.29  
77.31  
77.00  
76.68

35.19  
31.01  
27.92

19.28

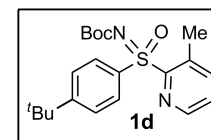

KALLOL-K 9 34 SM

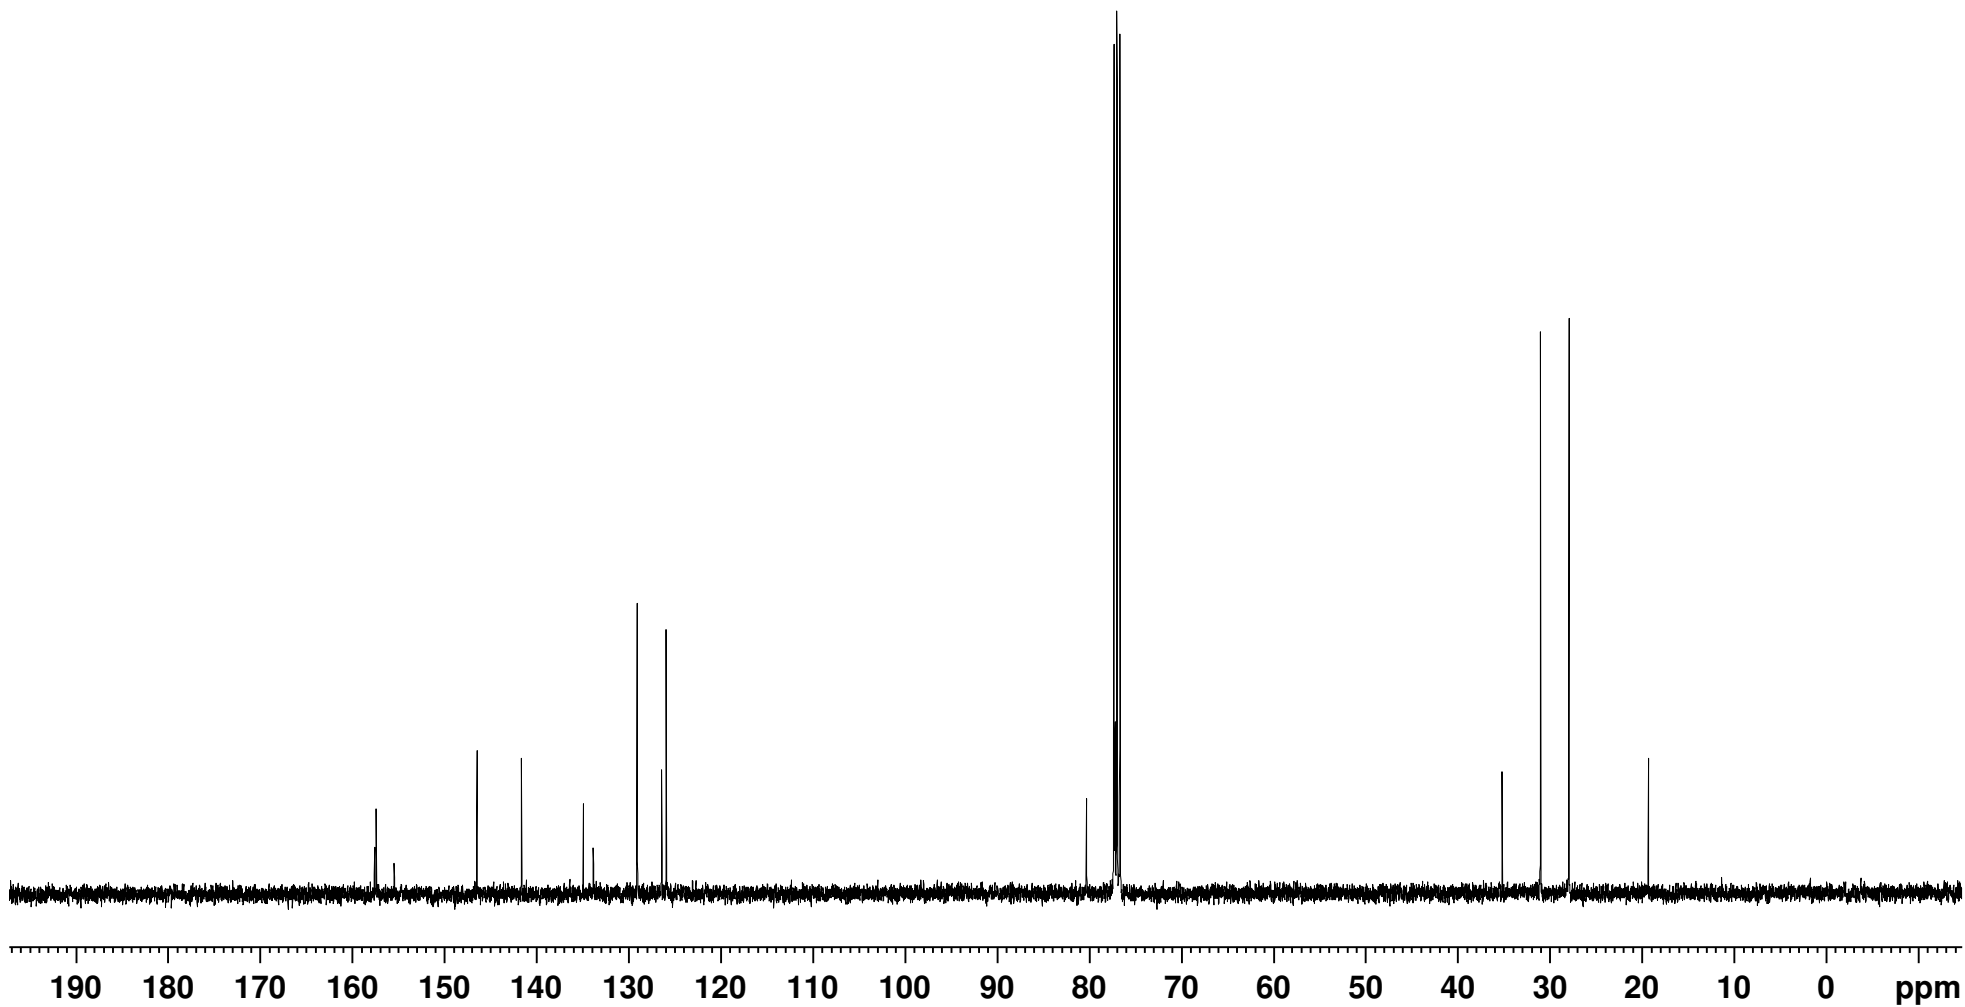

K-8-194

8.397  
8.386  
8.010  
7.989  
7.620  
7.601  
7.377  
7.355  
7.316  
7.305  
7.297  
7.285  
7.260

3.015  
2.998  
2.981  
2.963  
2.946  
2.929  
2.915  
2.756

1.337  
1.252  
1.234

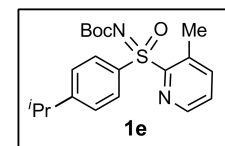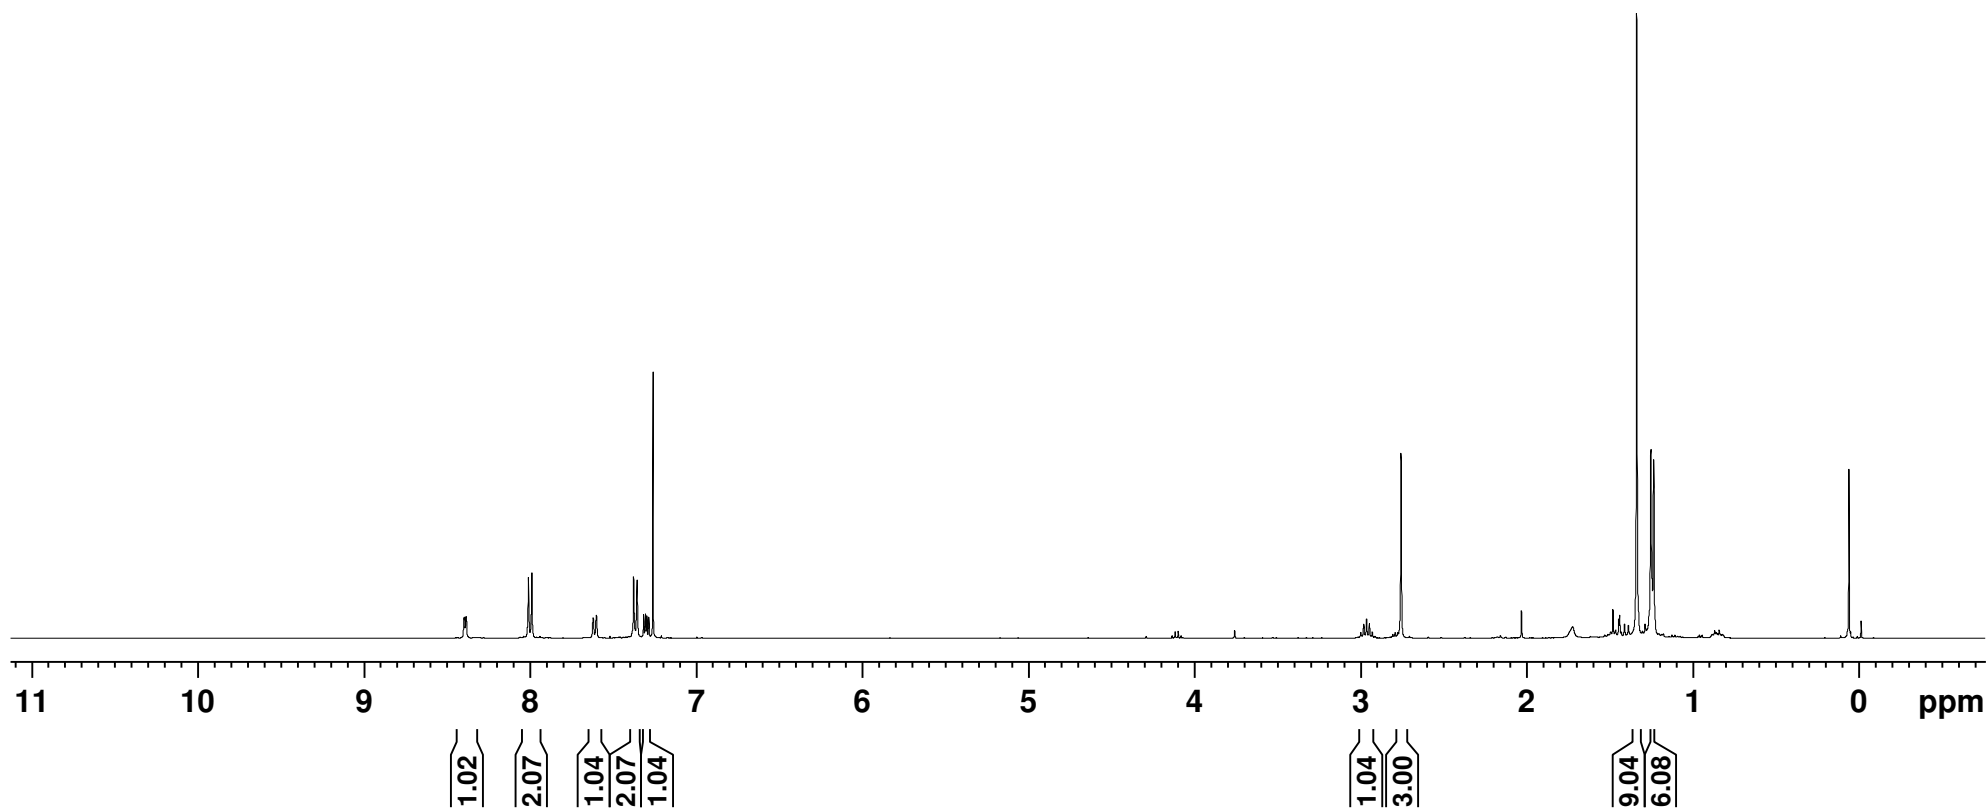

157.59  
155.49  
155.15

146.46

141.64

134.93  
134.19

129.39  
127.03  
126.41

80.27  
77.31  
77.00  
76.68

34.16

27.91

23.54

19.26

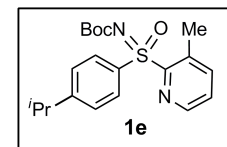

K-8-194

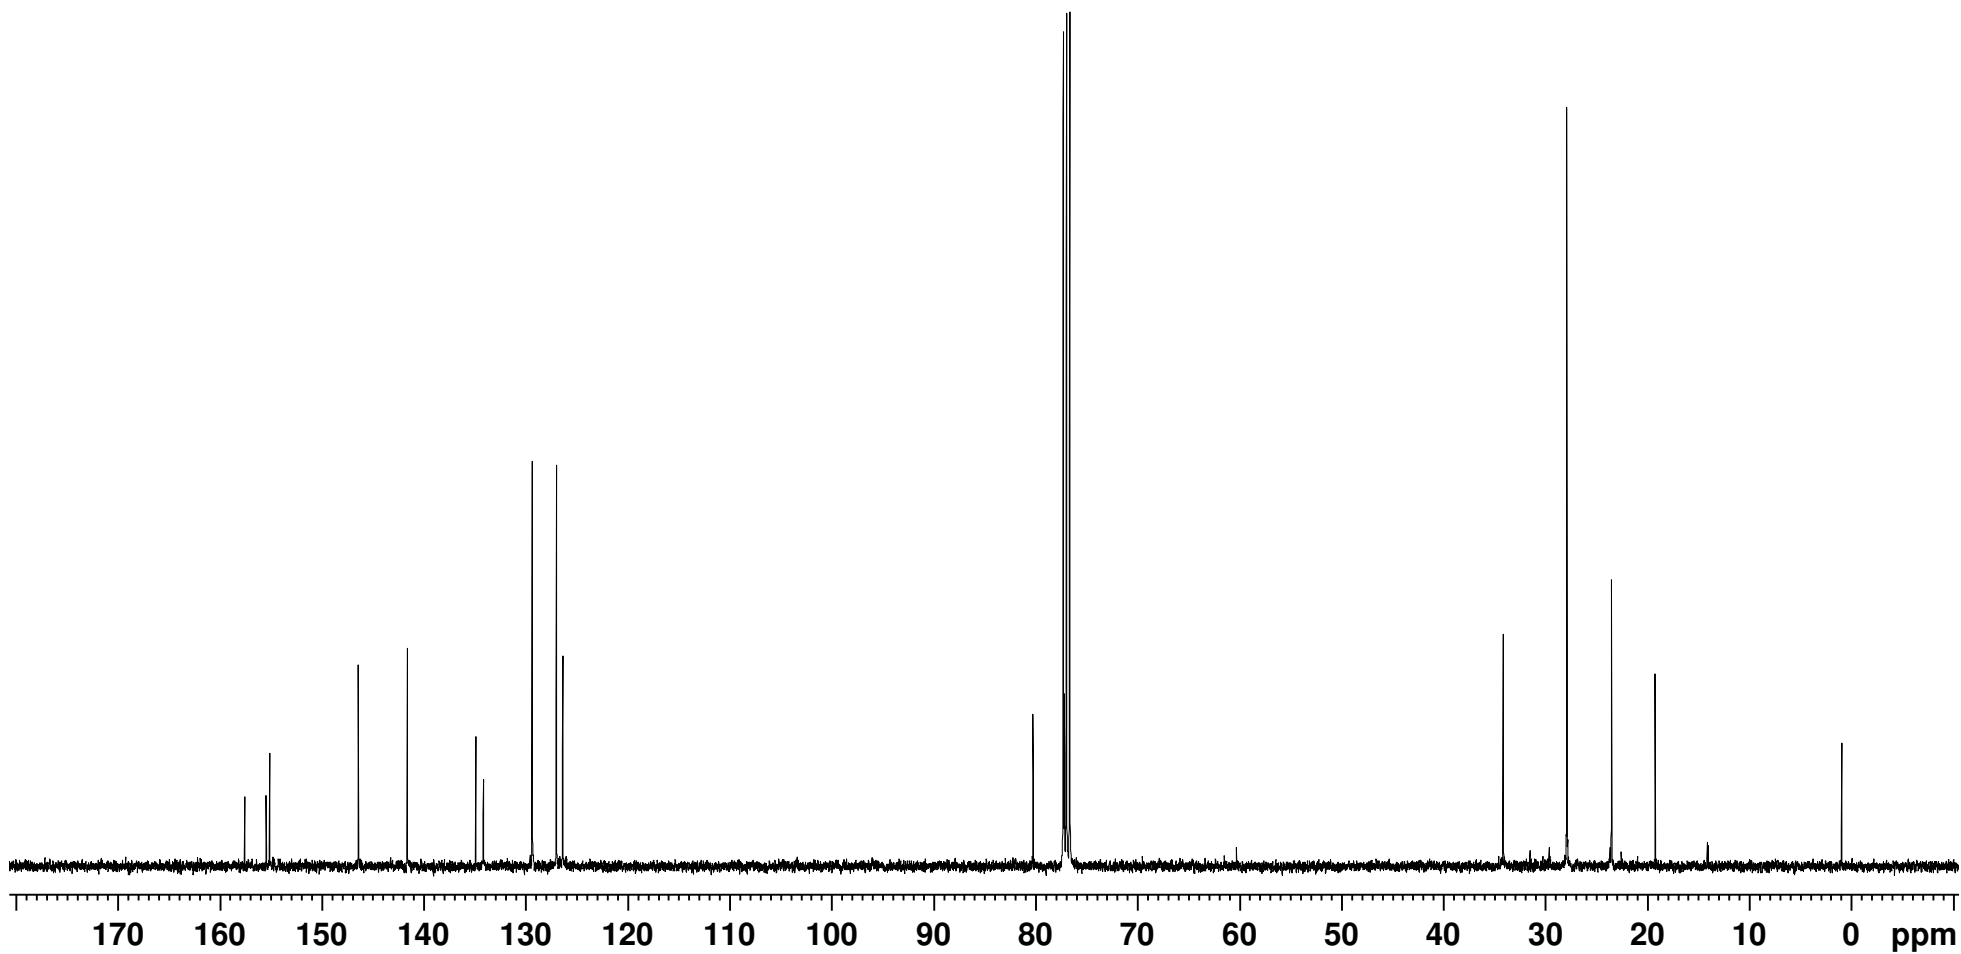



K-8-192

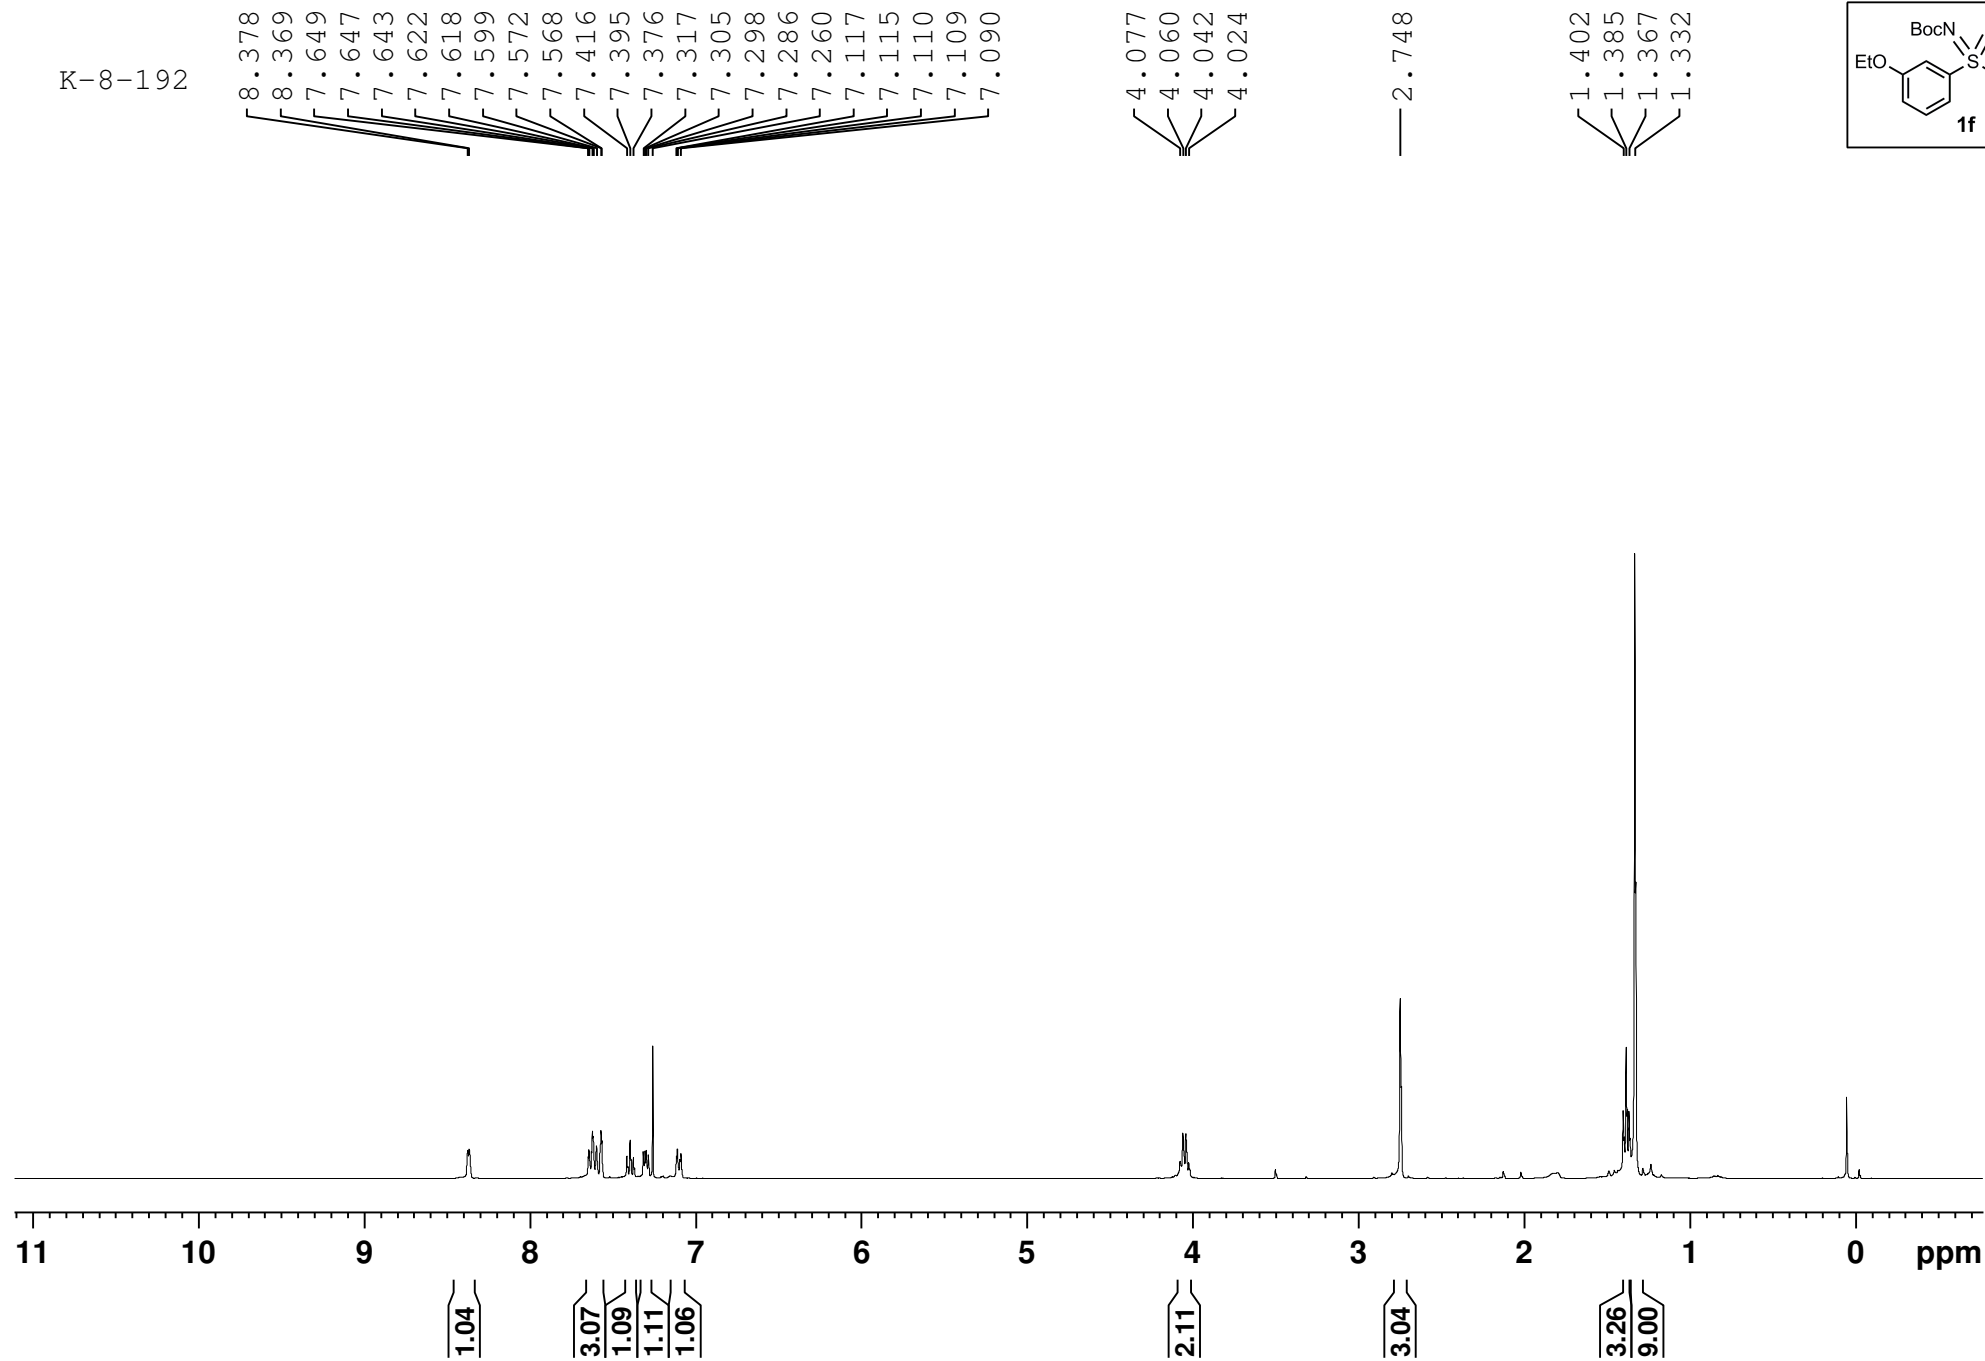

K-8-192

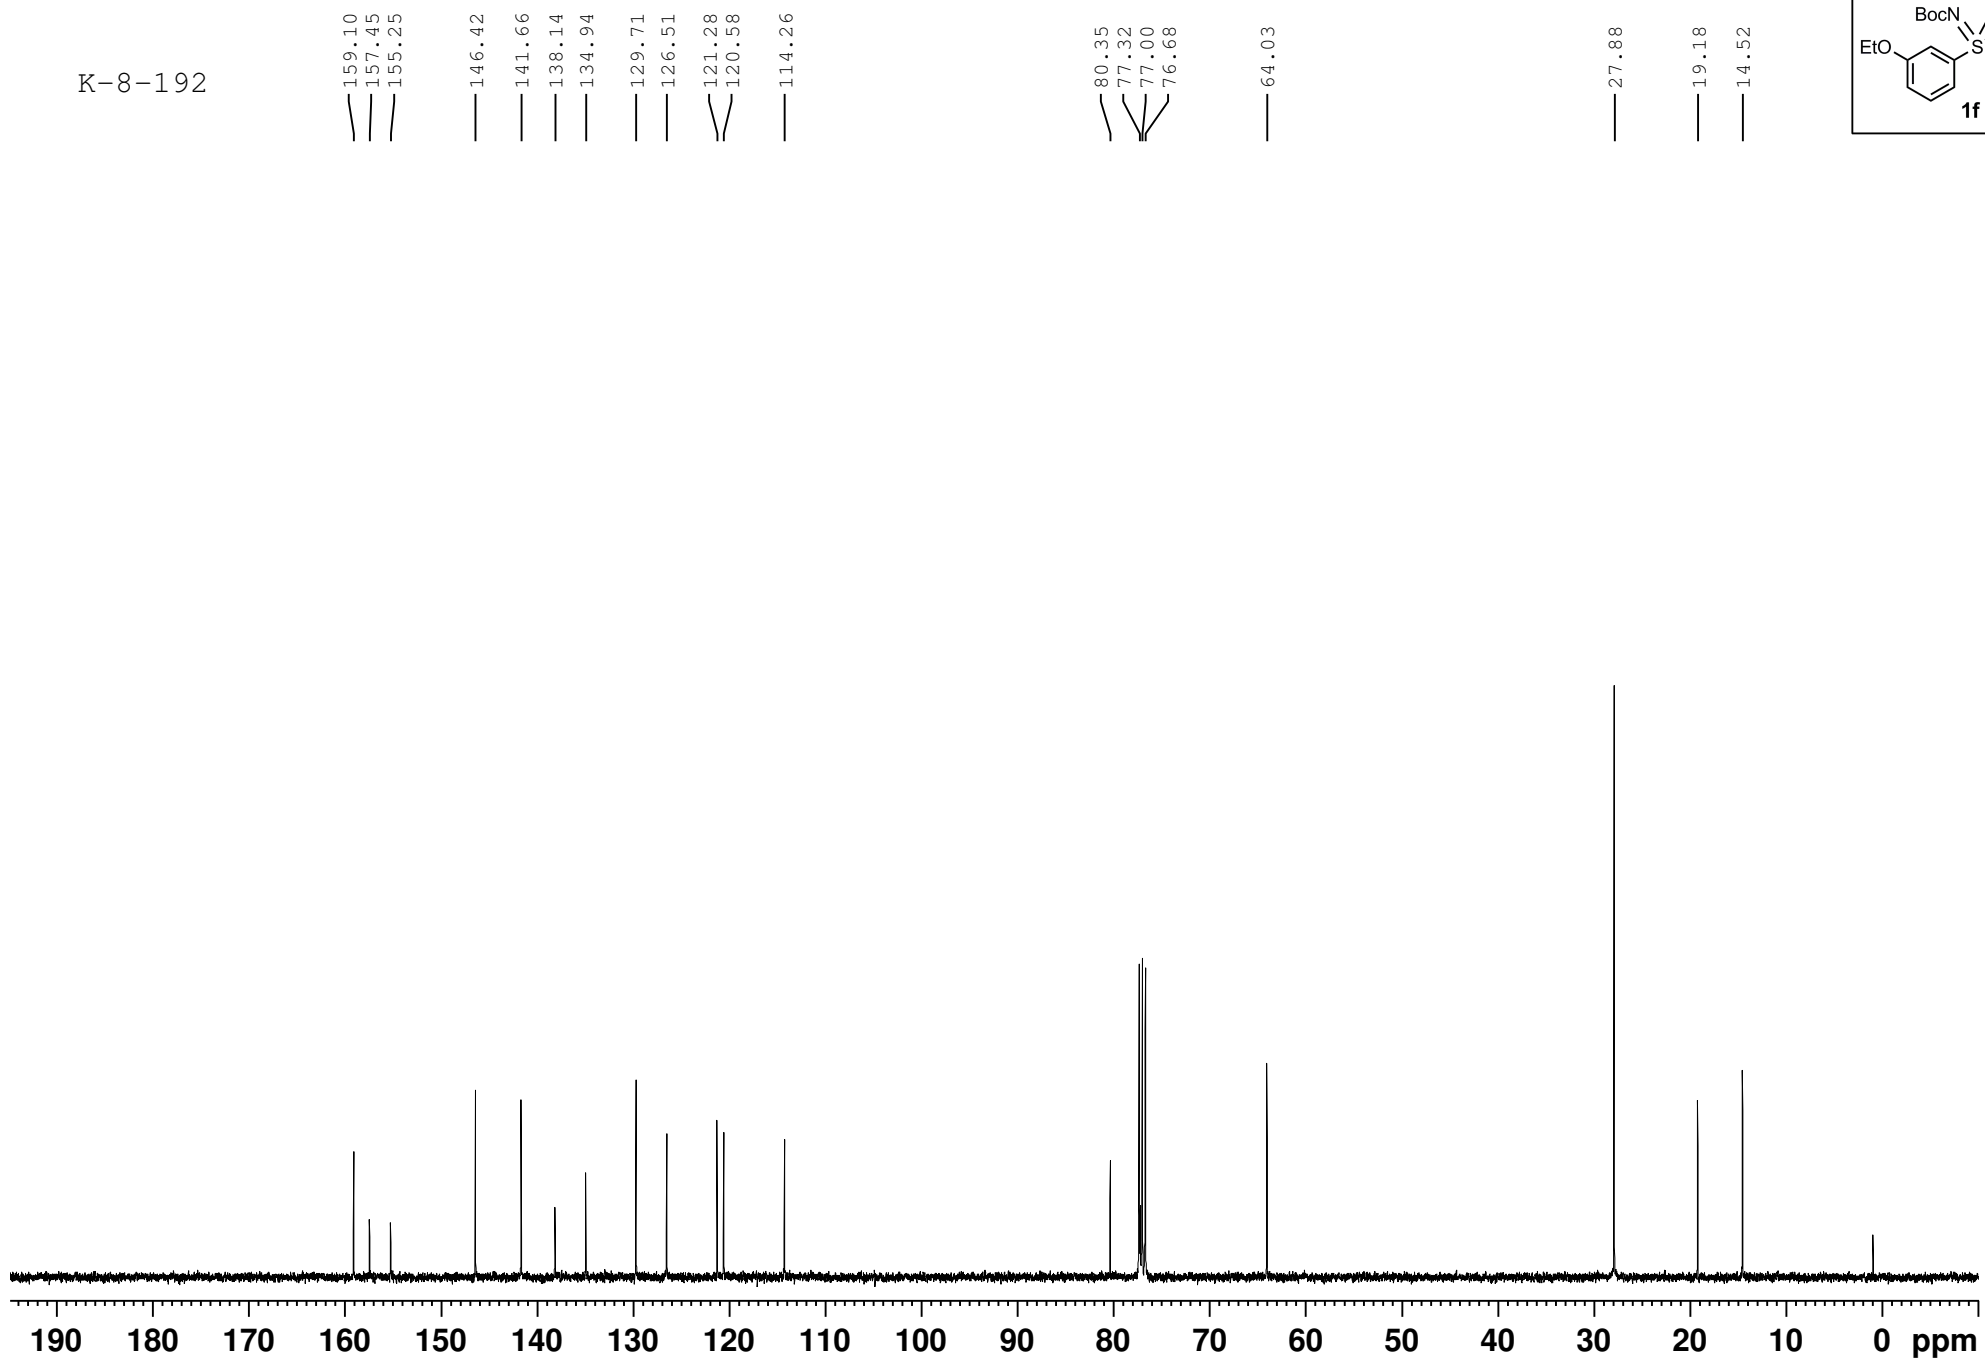

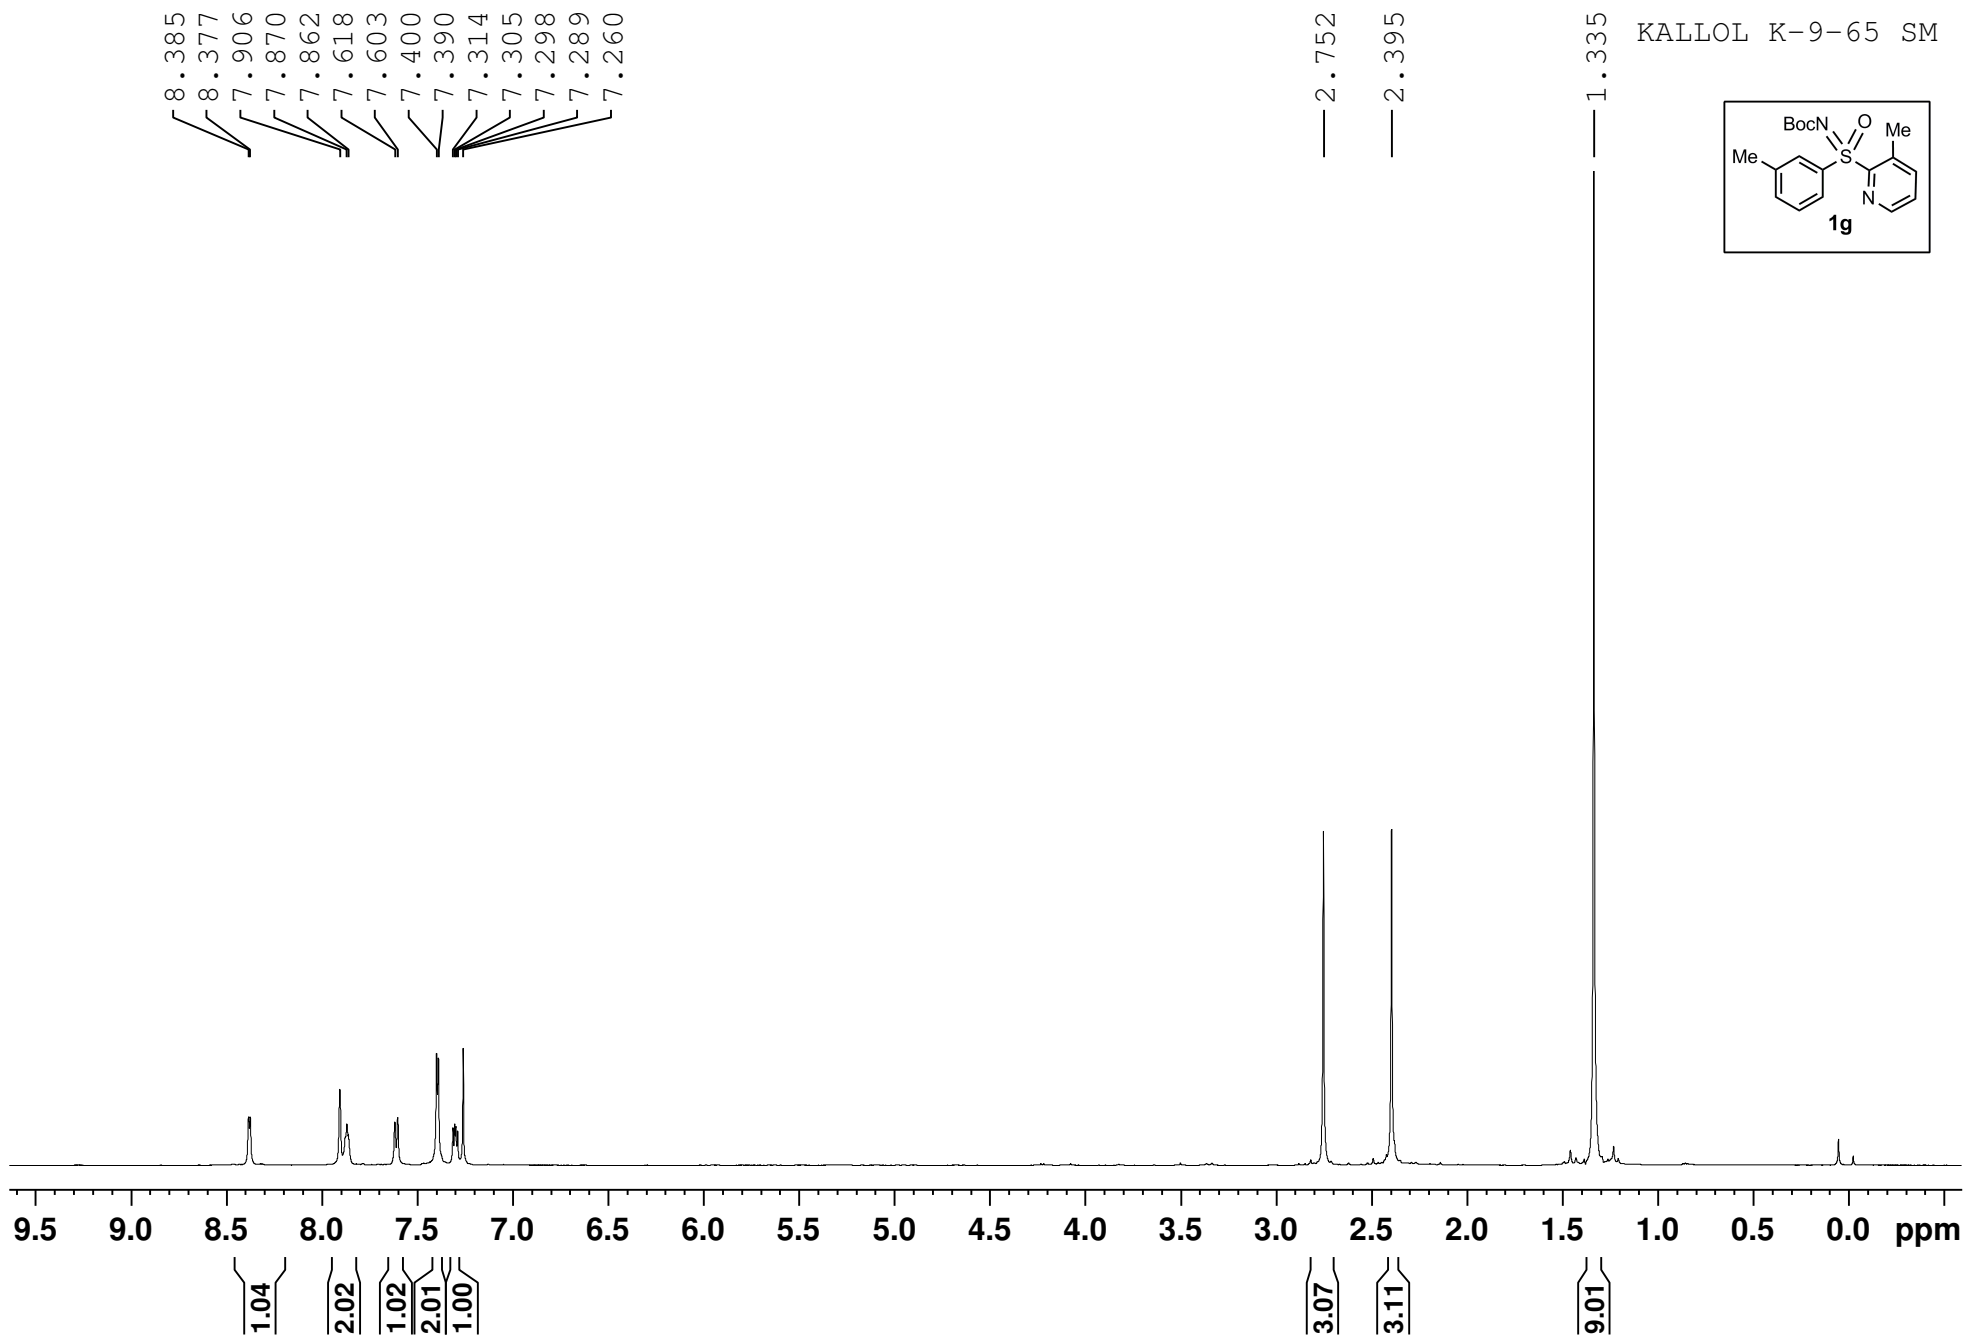

157.60  
155.24

146.49  
141.67  
139.13  
136.83  
135.01  
134.36  
129.43  
128.65  
126.47  
126.28

80.32  
77.25  
77.00  
76.75

27.87

21.26  
19.23

KALLOL K-9-65 SM

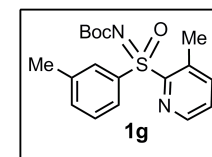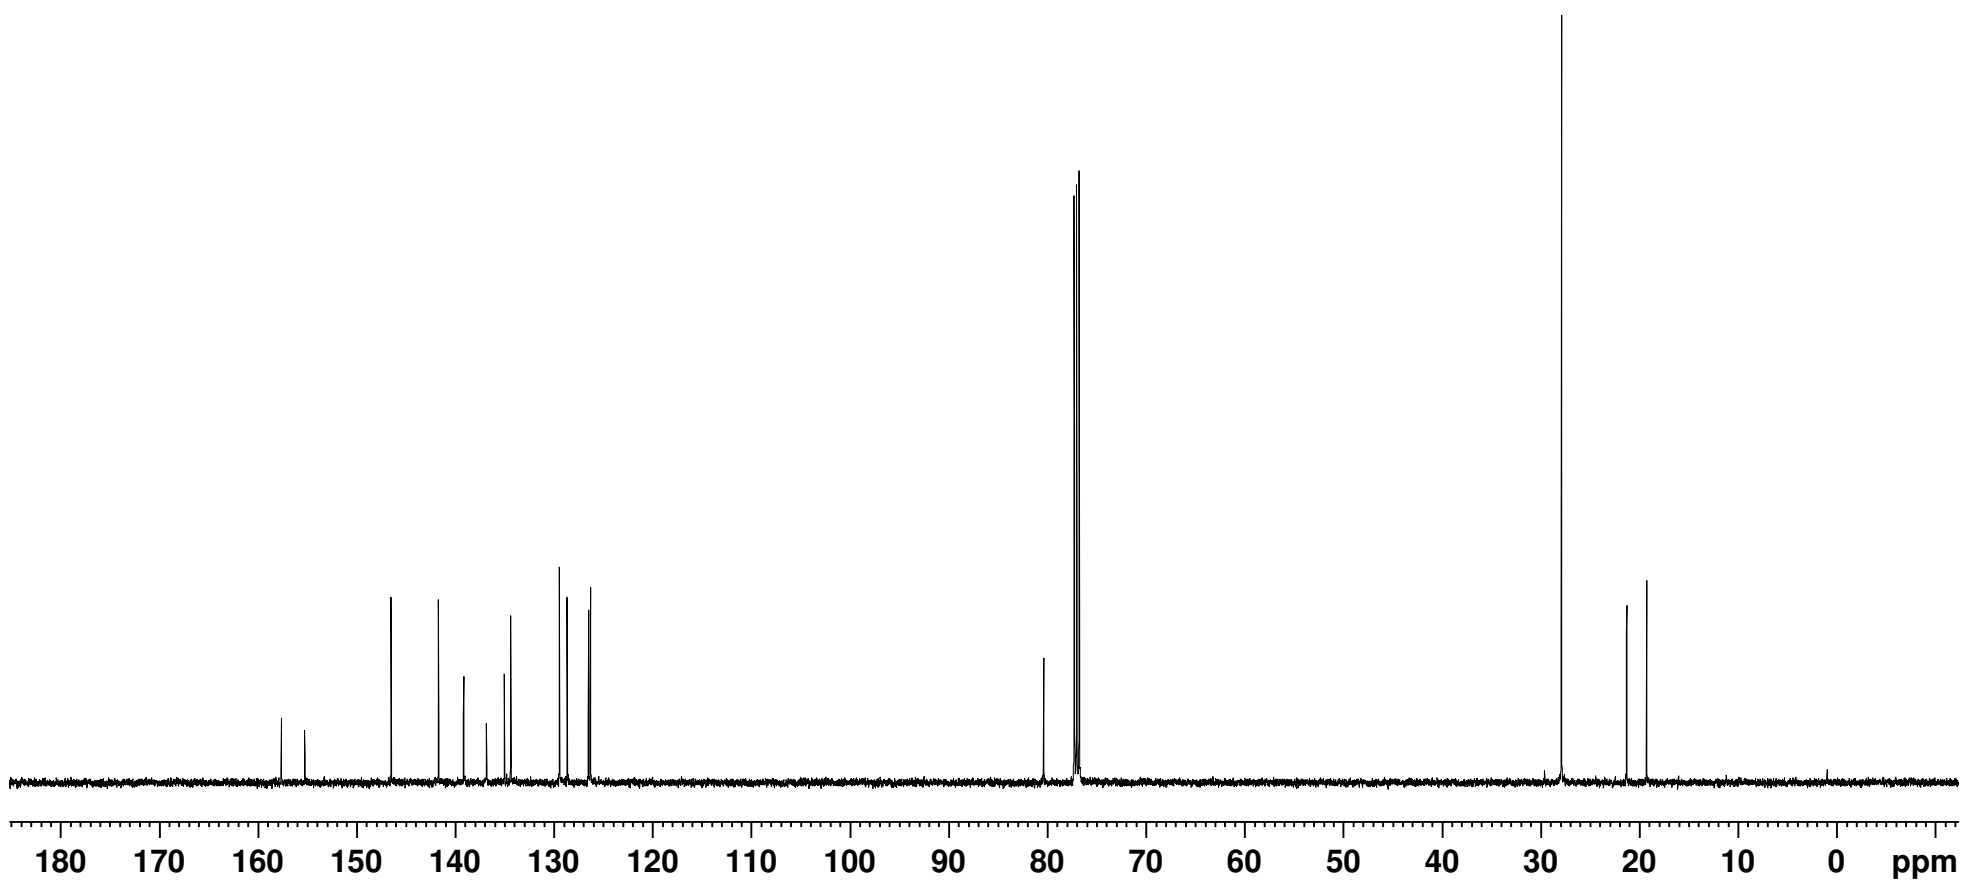

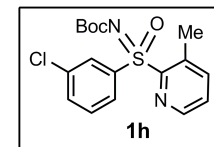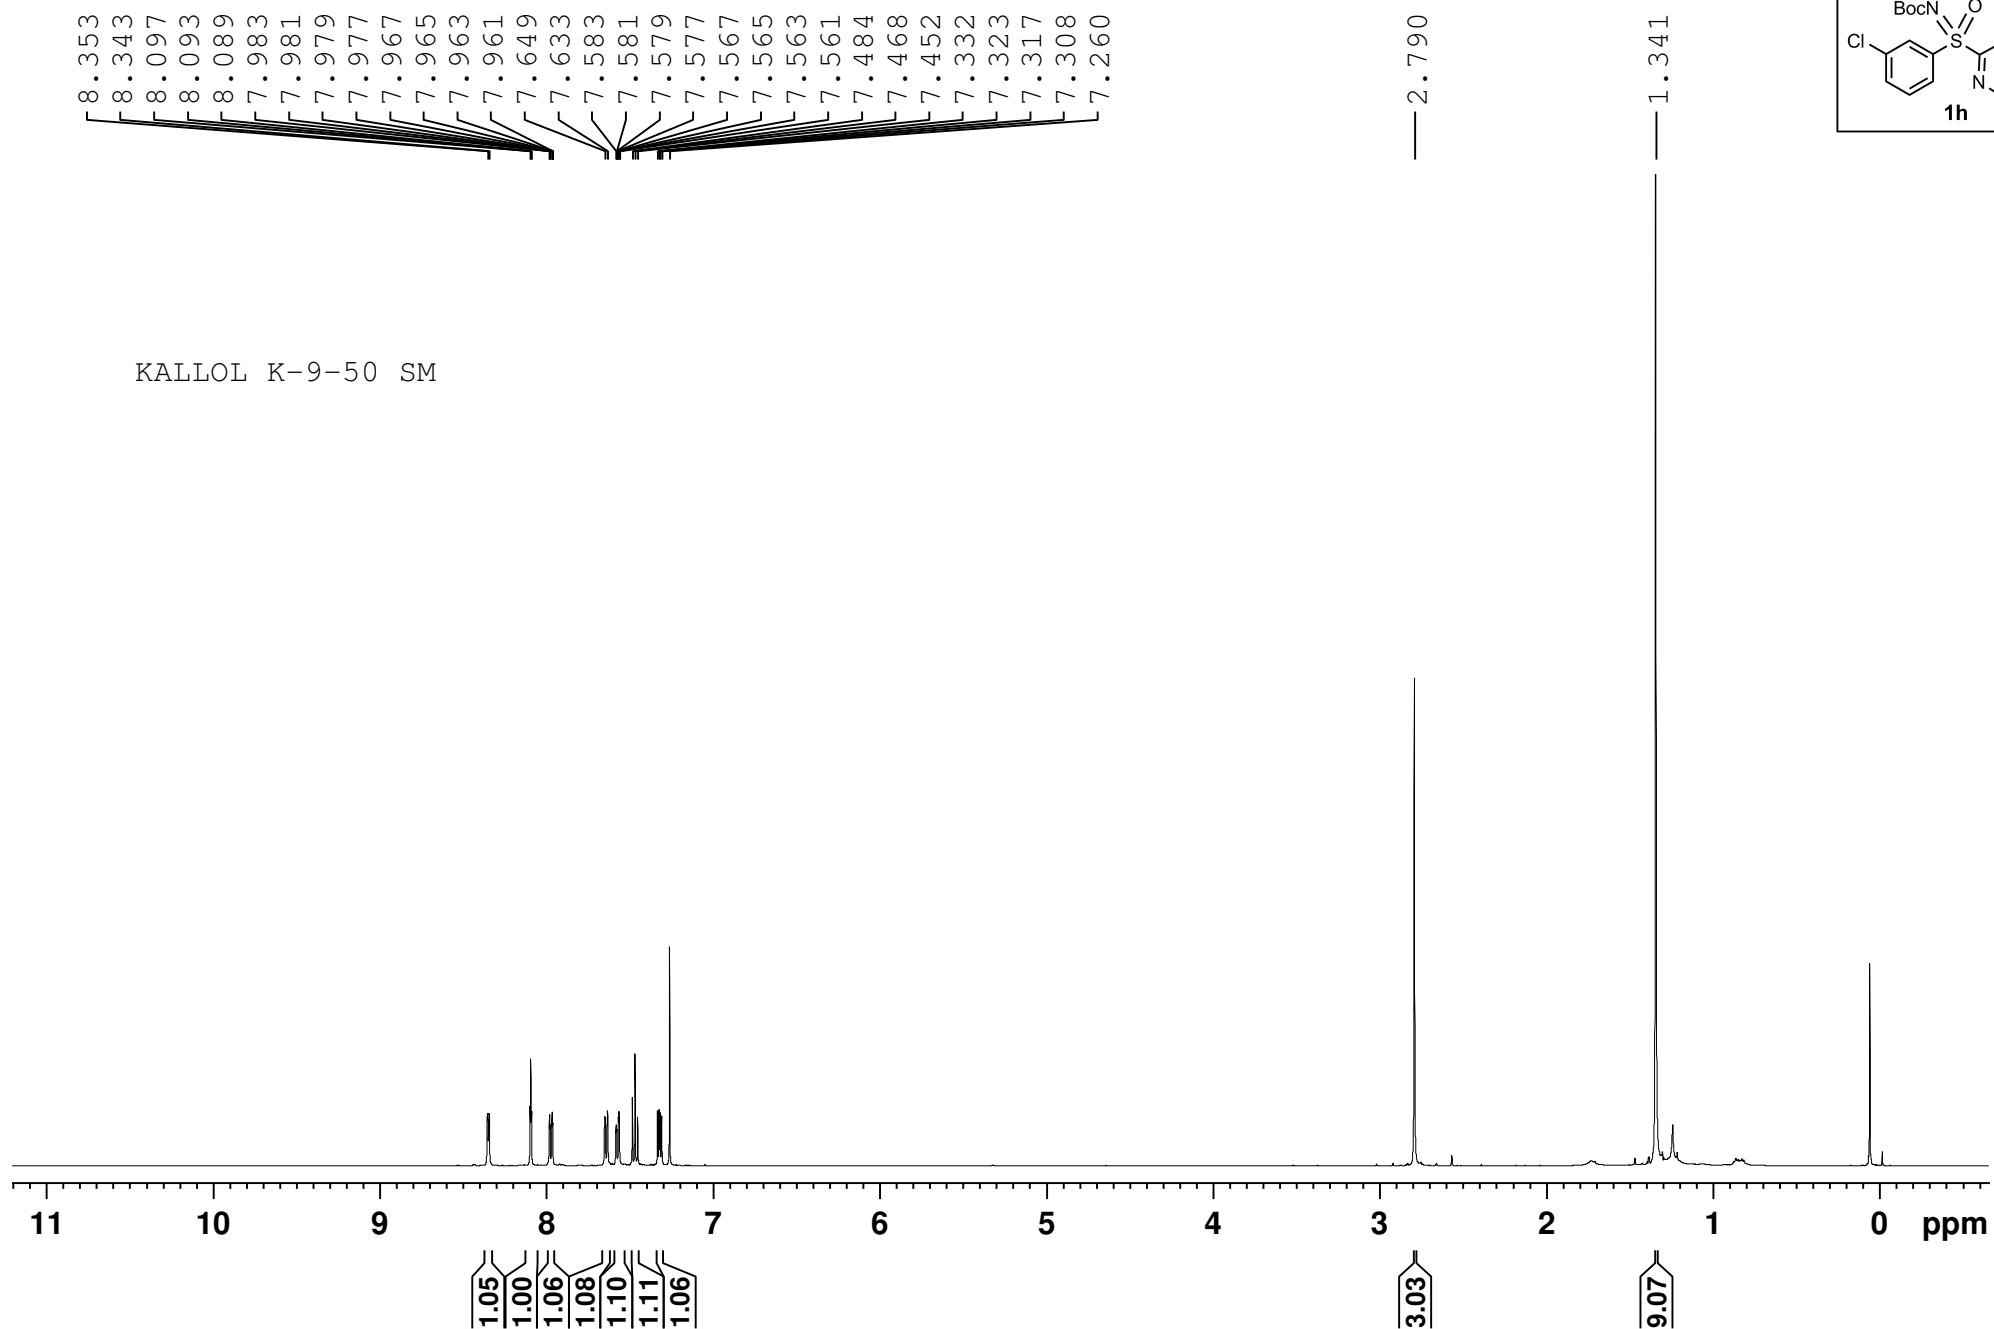

157.24  
154.86

146.44  
141.79  
138.99  
135.31  
135.05  
133.61  
129.92  
129.42  
127.56  
126.66

80.70  
77.25  
77.00  
76.74

27.87

19.11

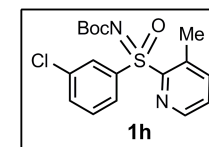

KALLOL K-9-50 SM

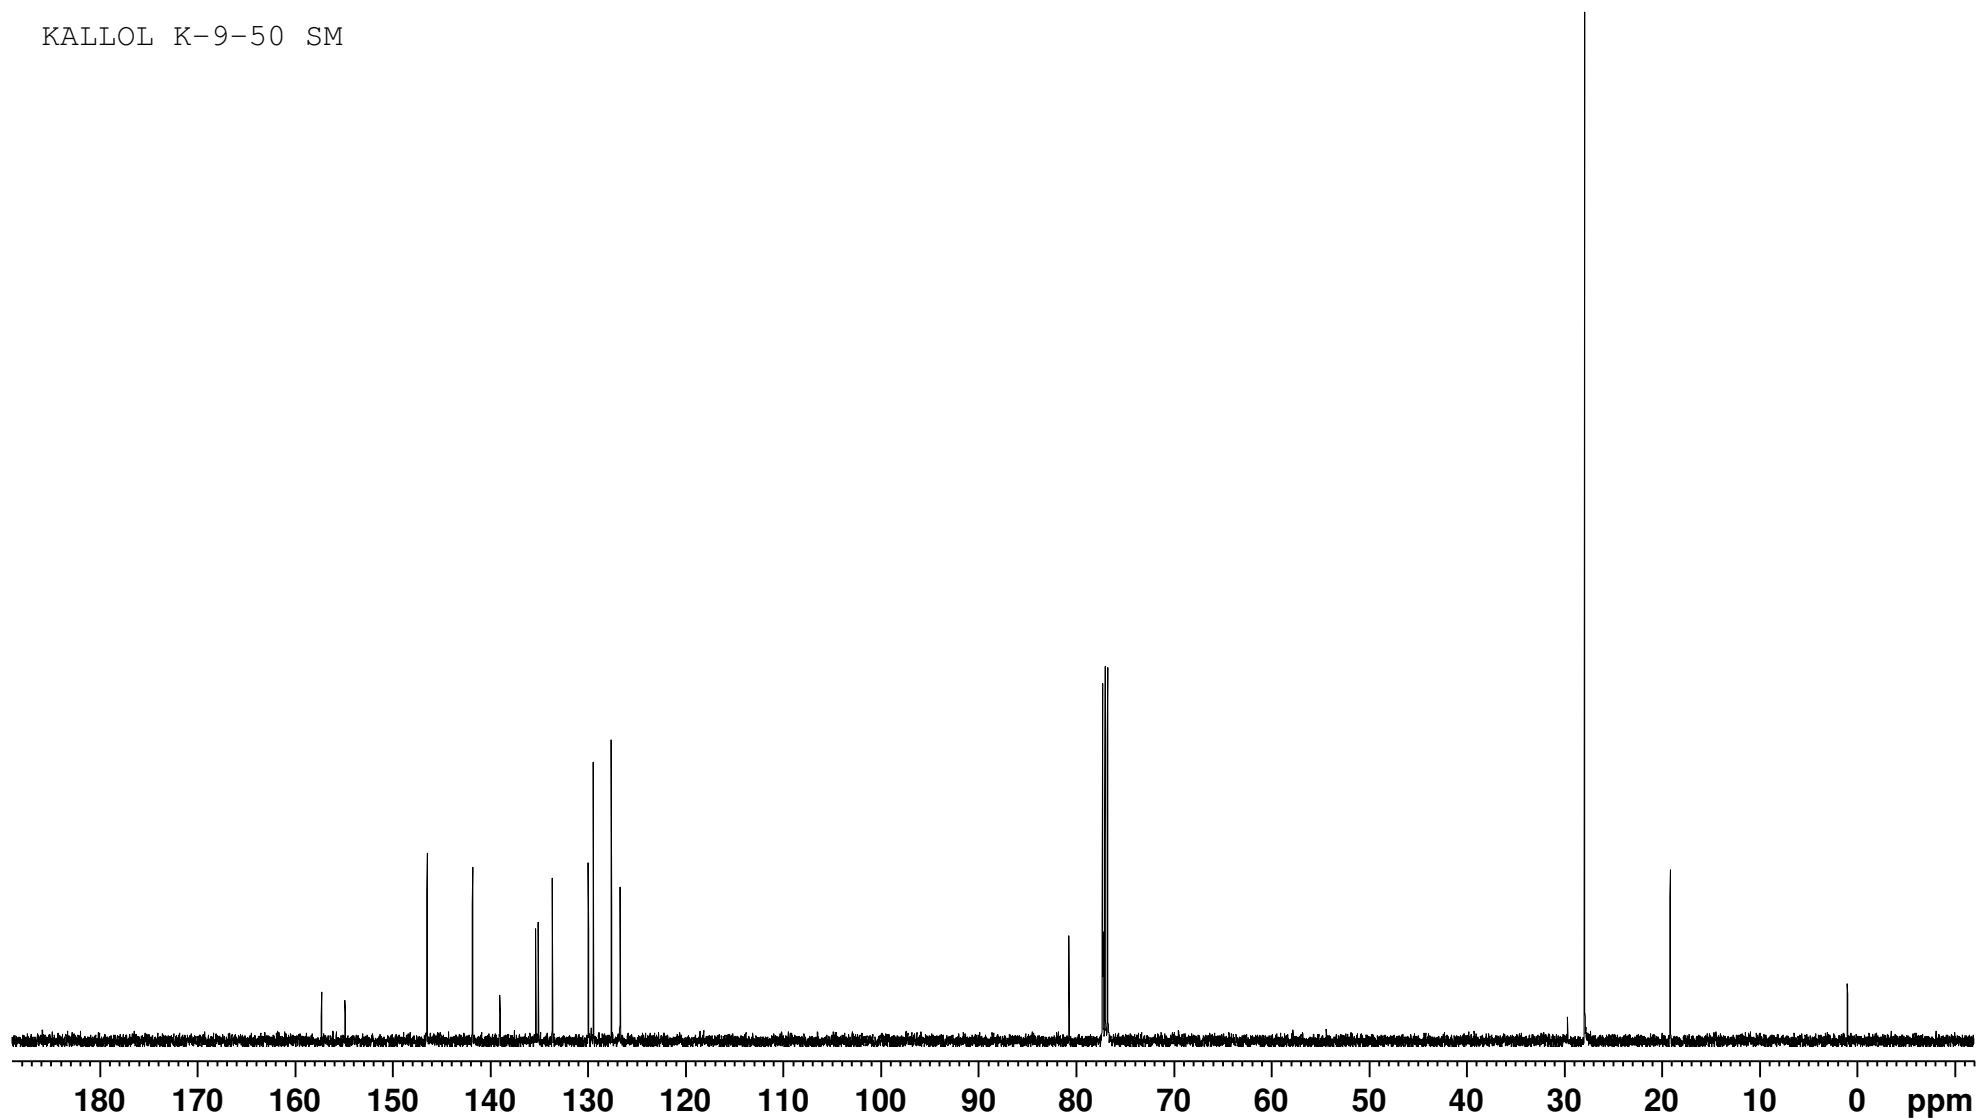

KALLOL-8-191

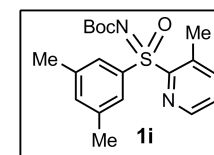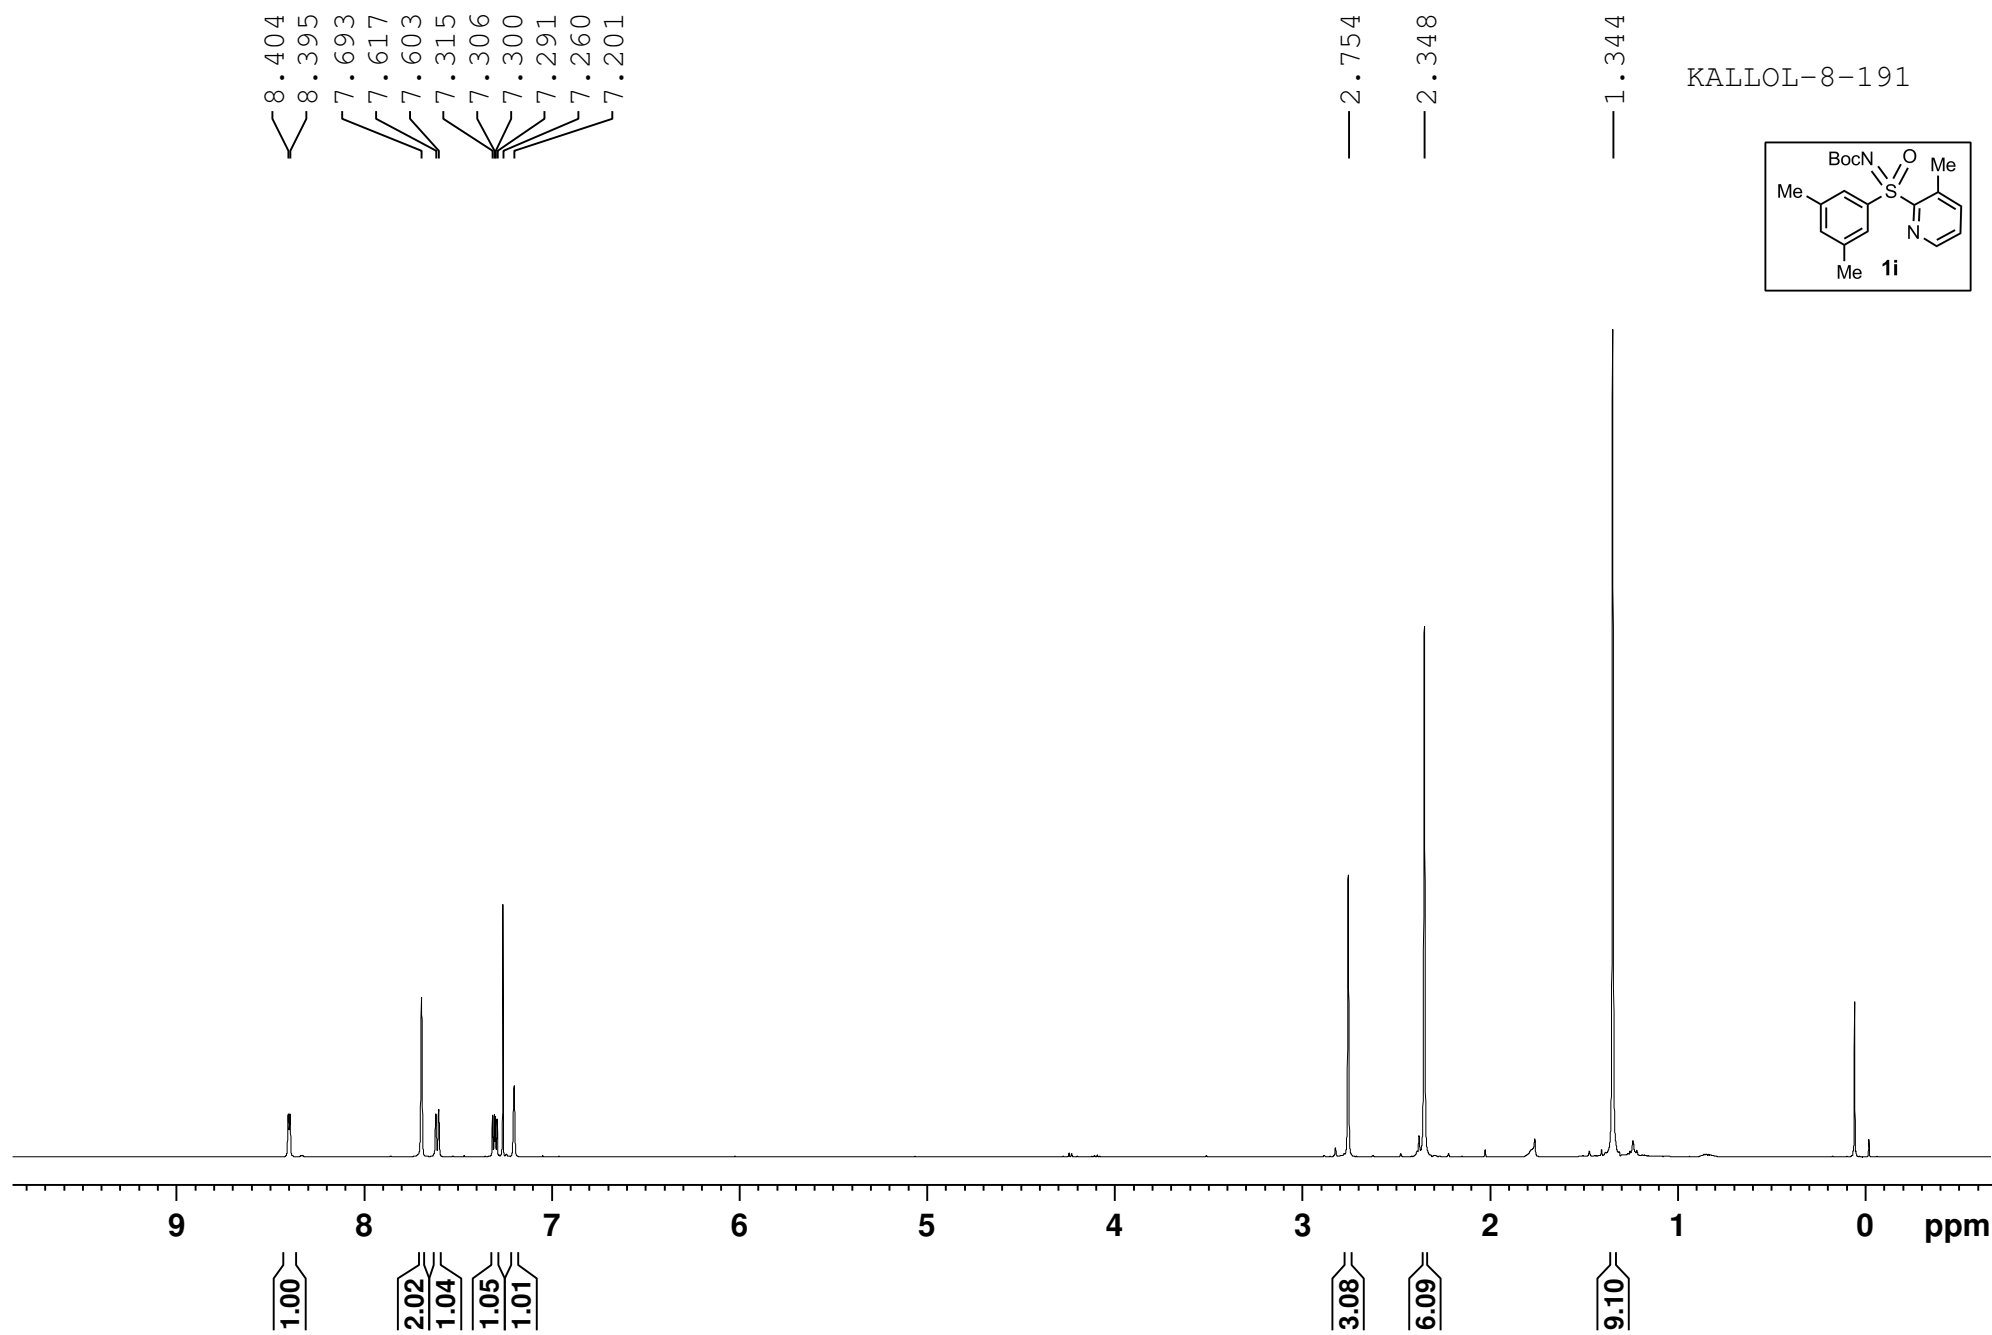

KALLOL-8-191

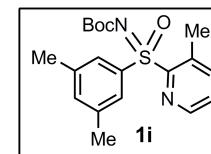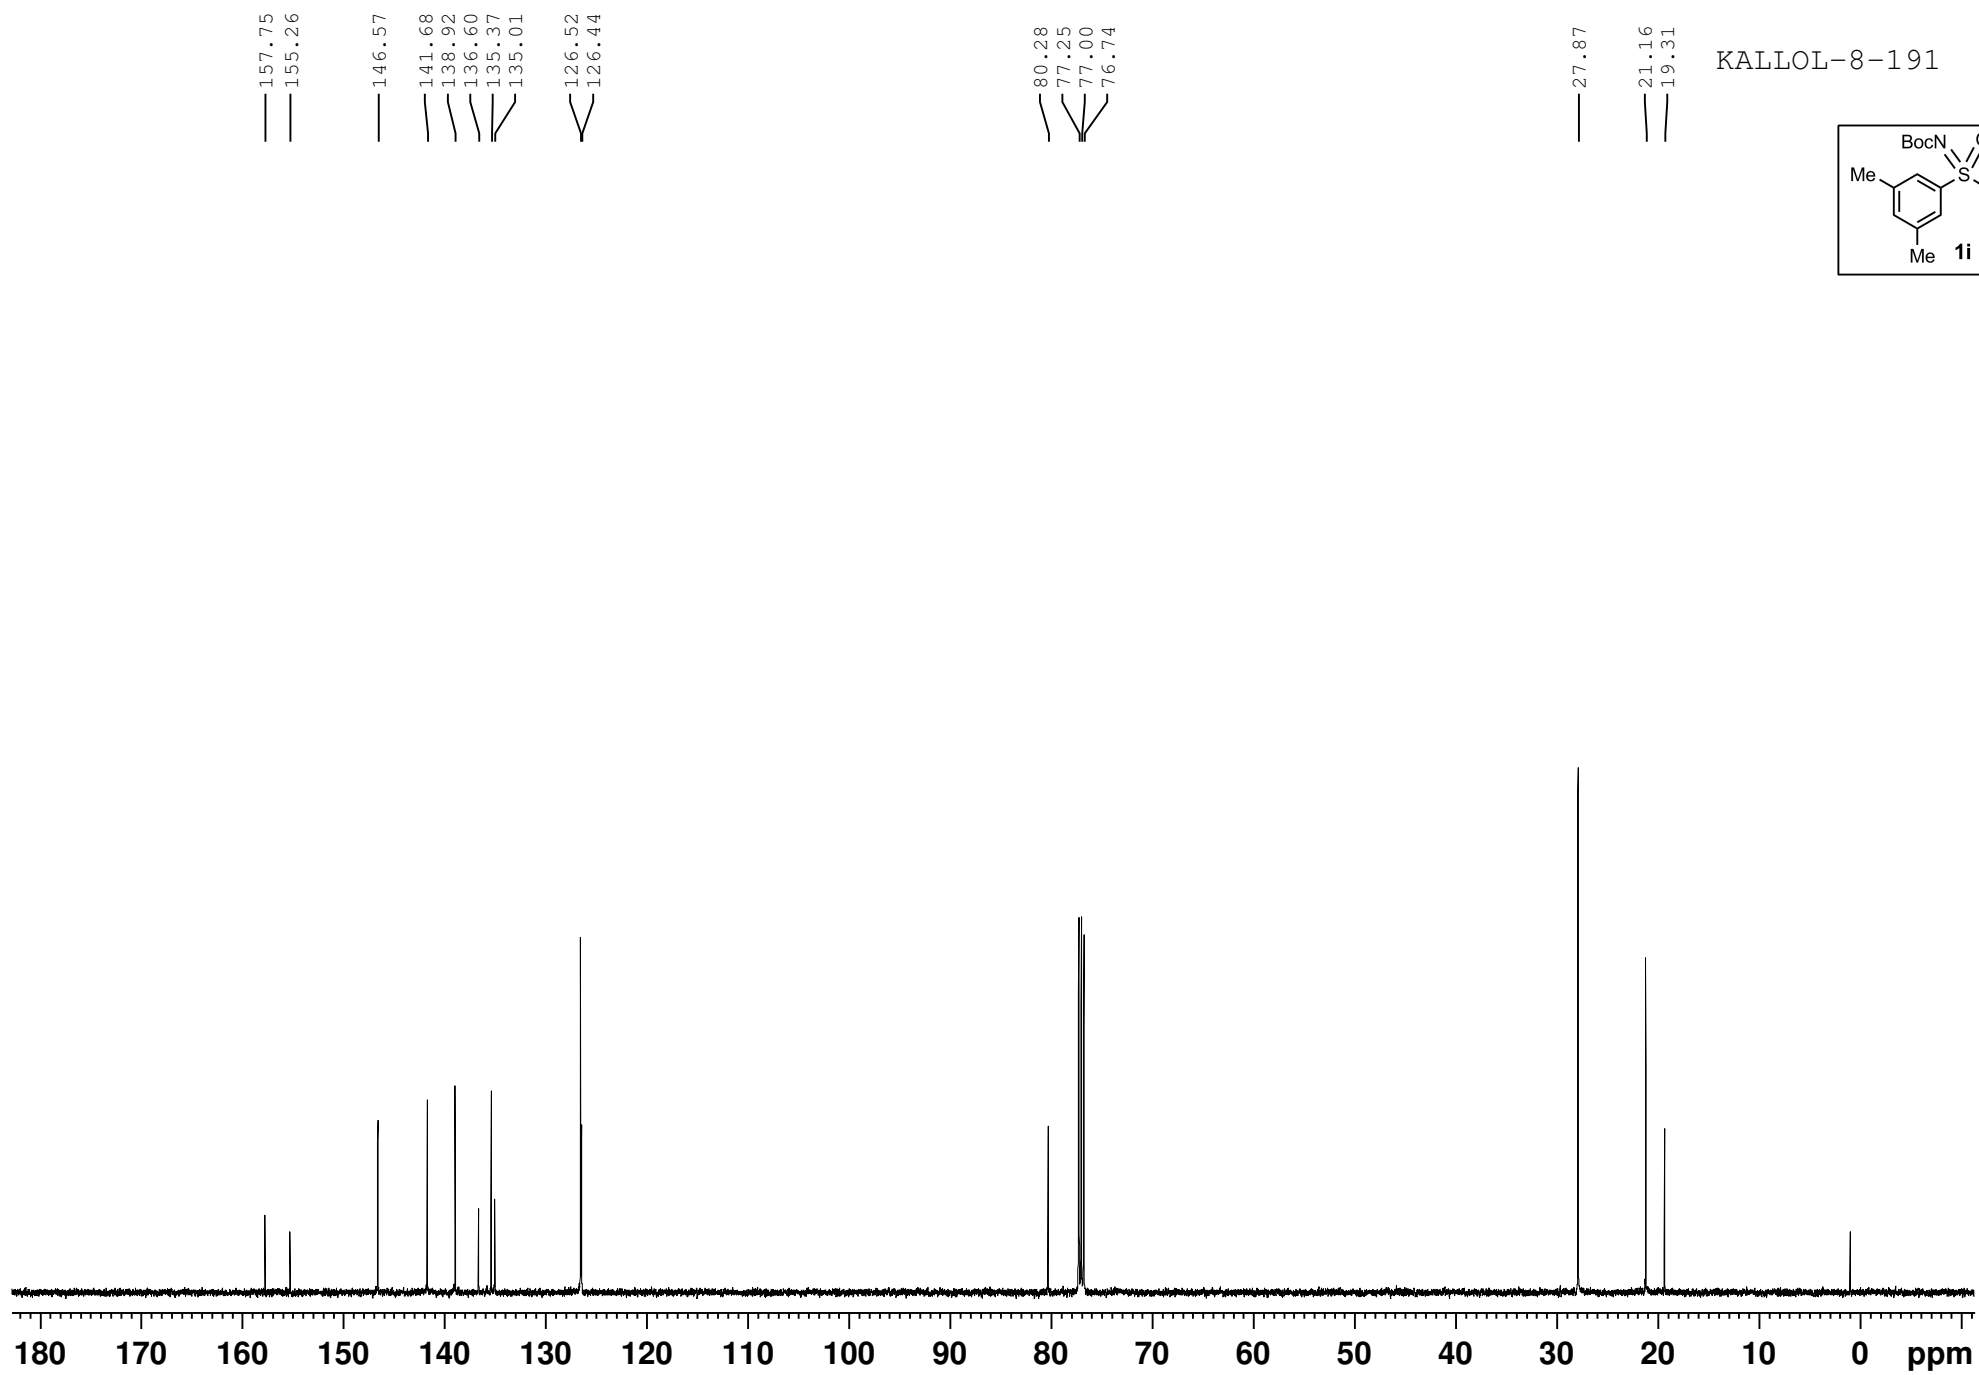



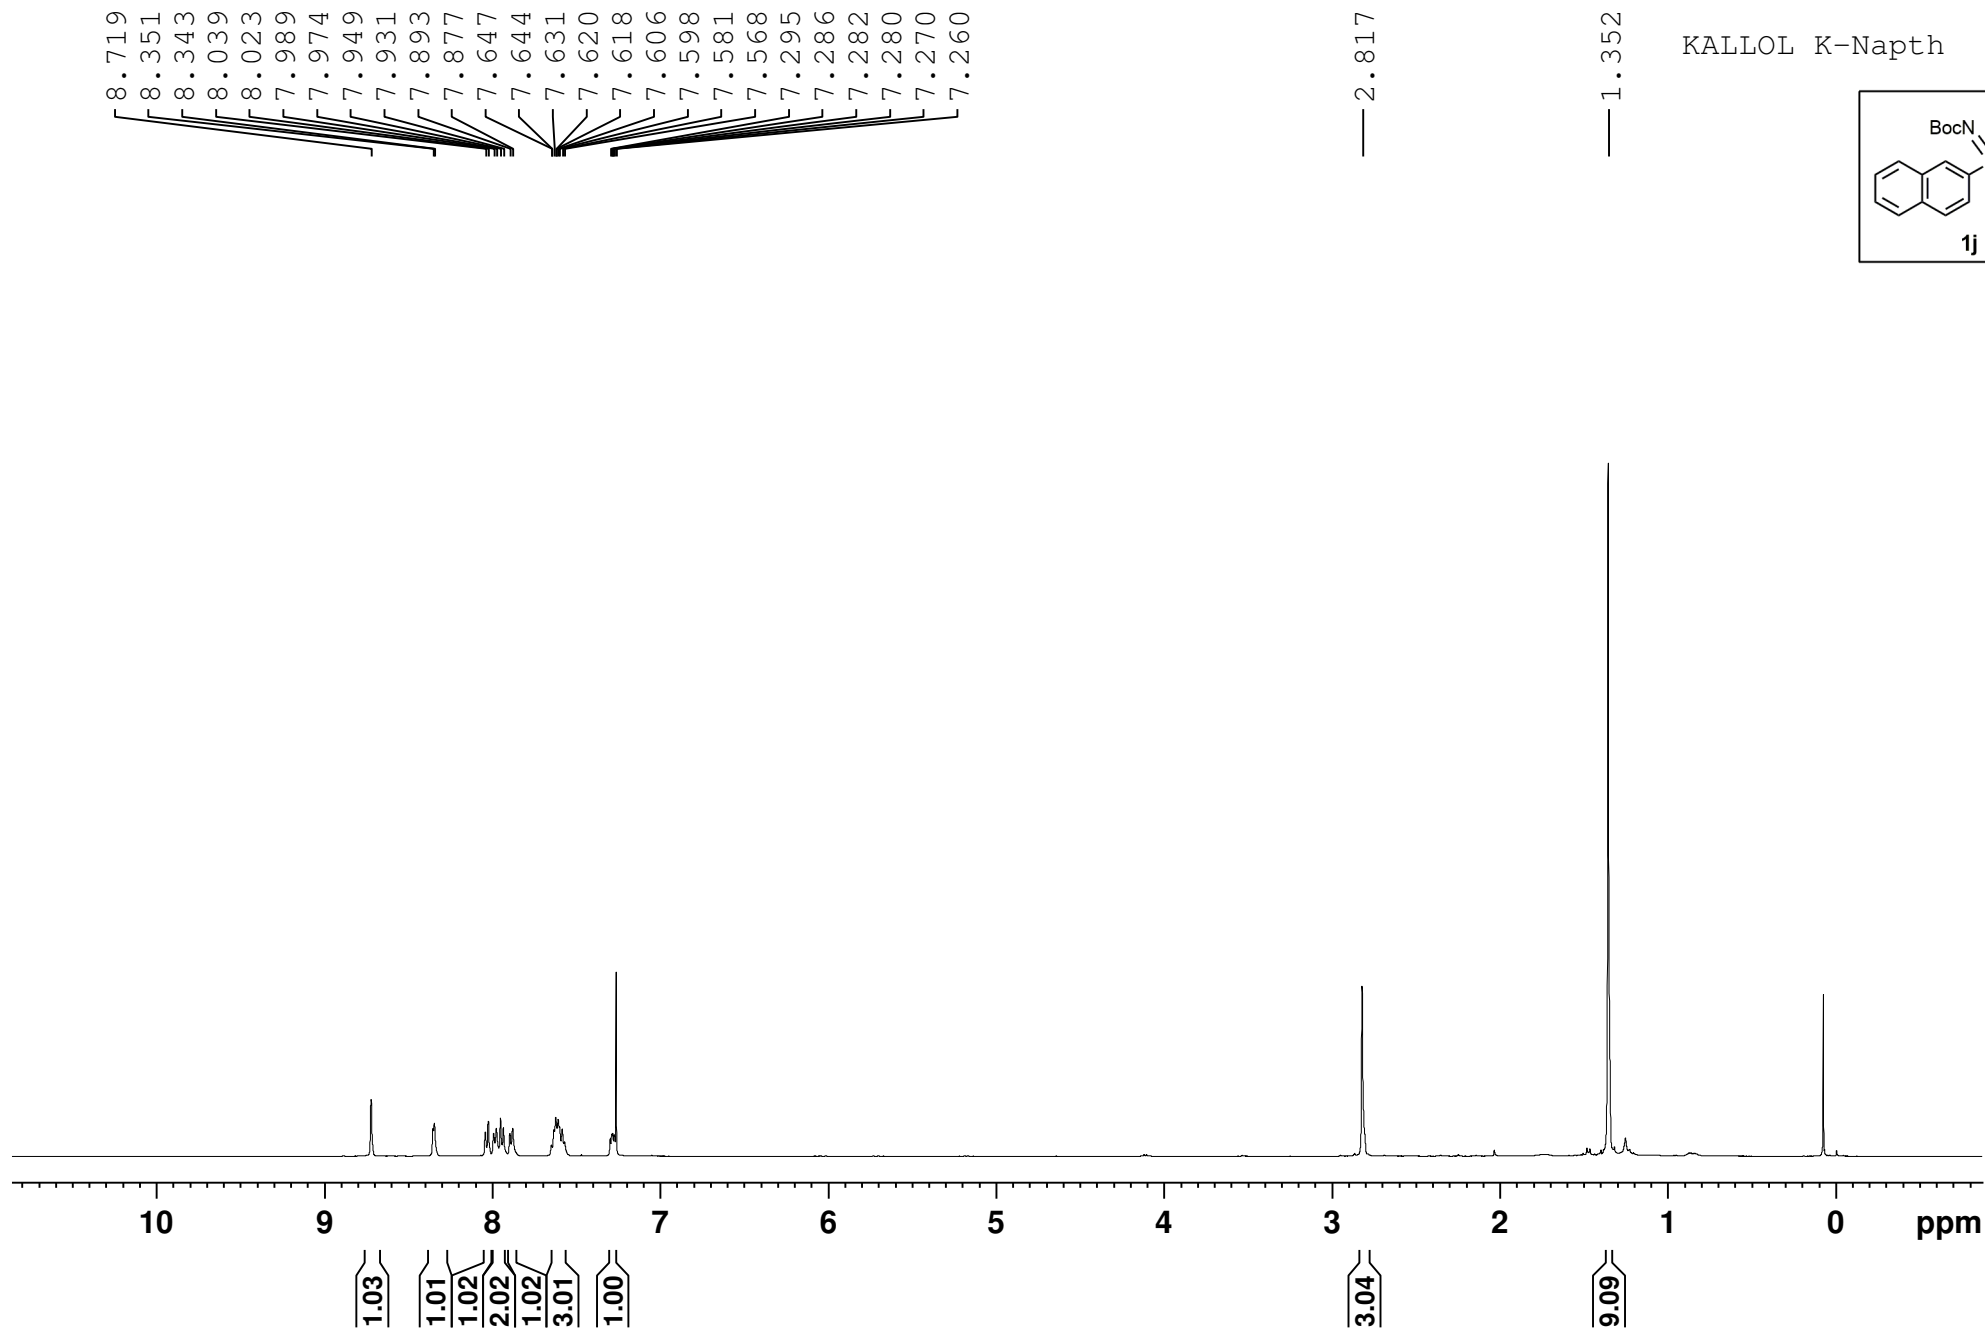

KALLOL K-Napth

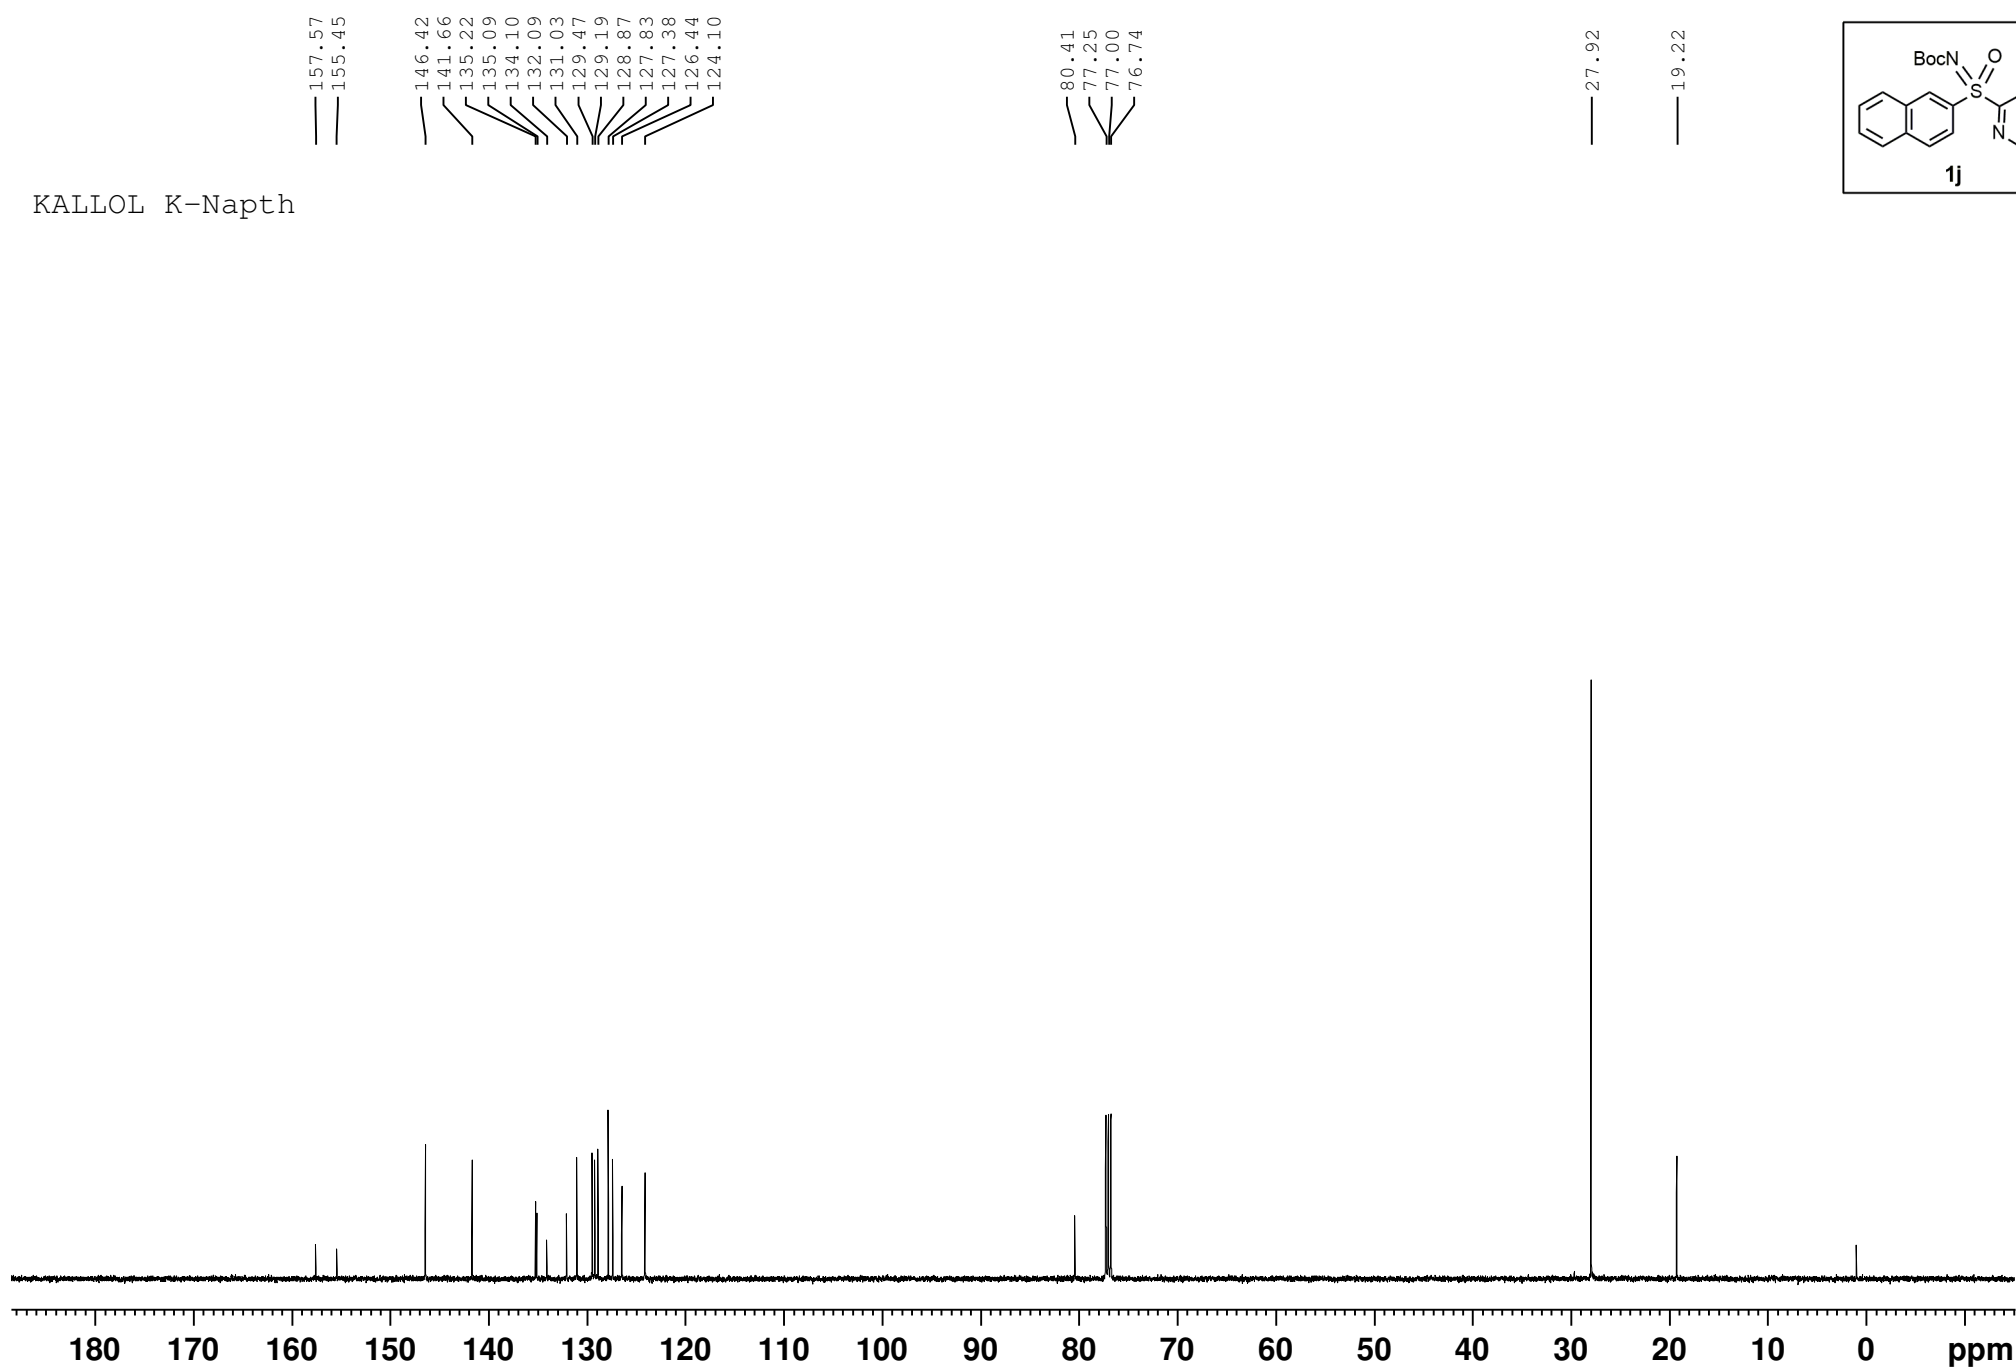

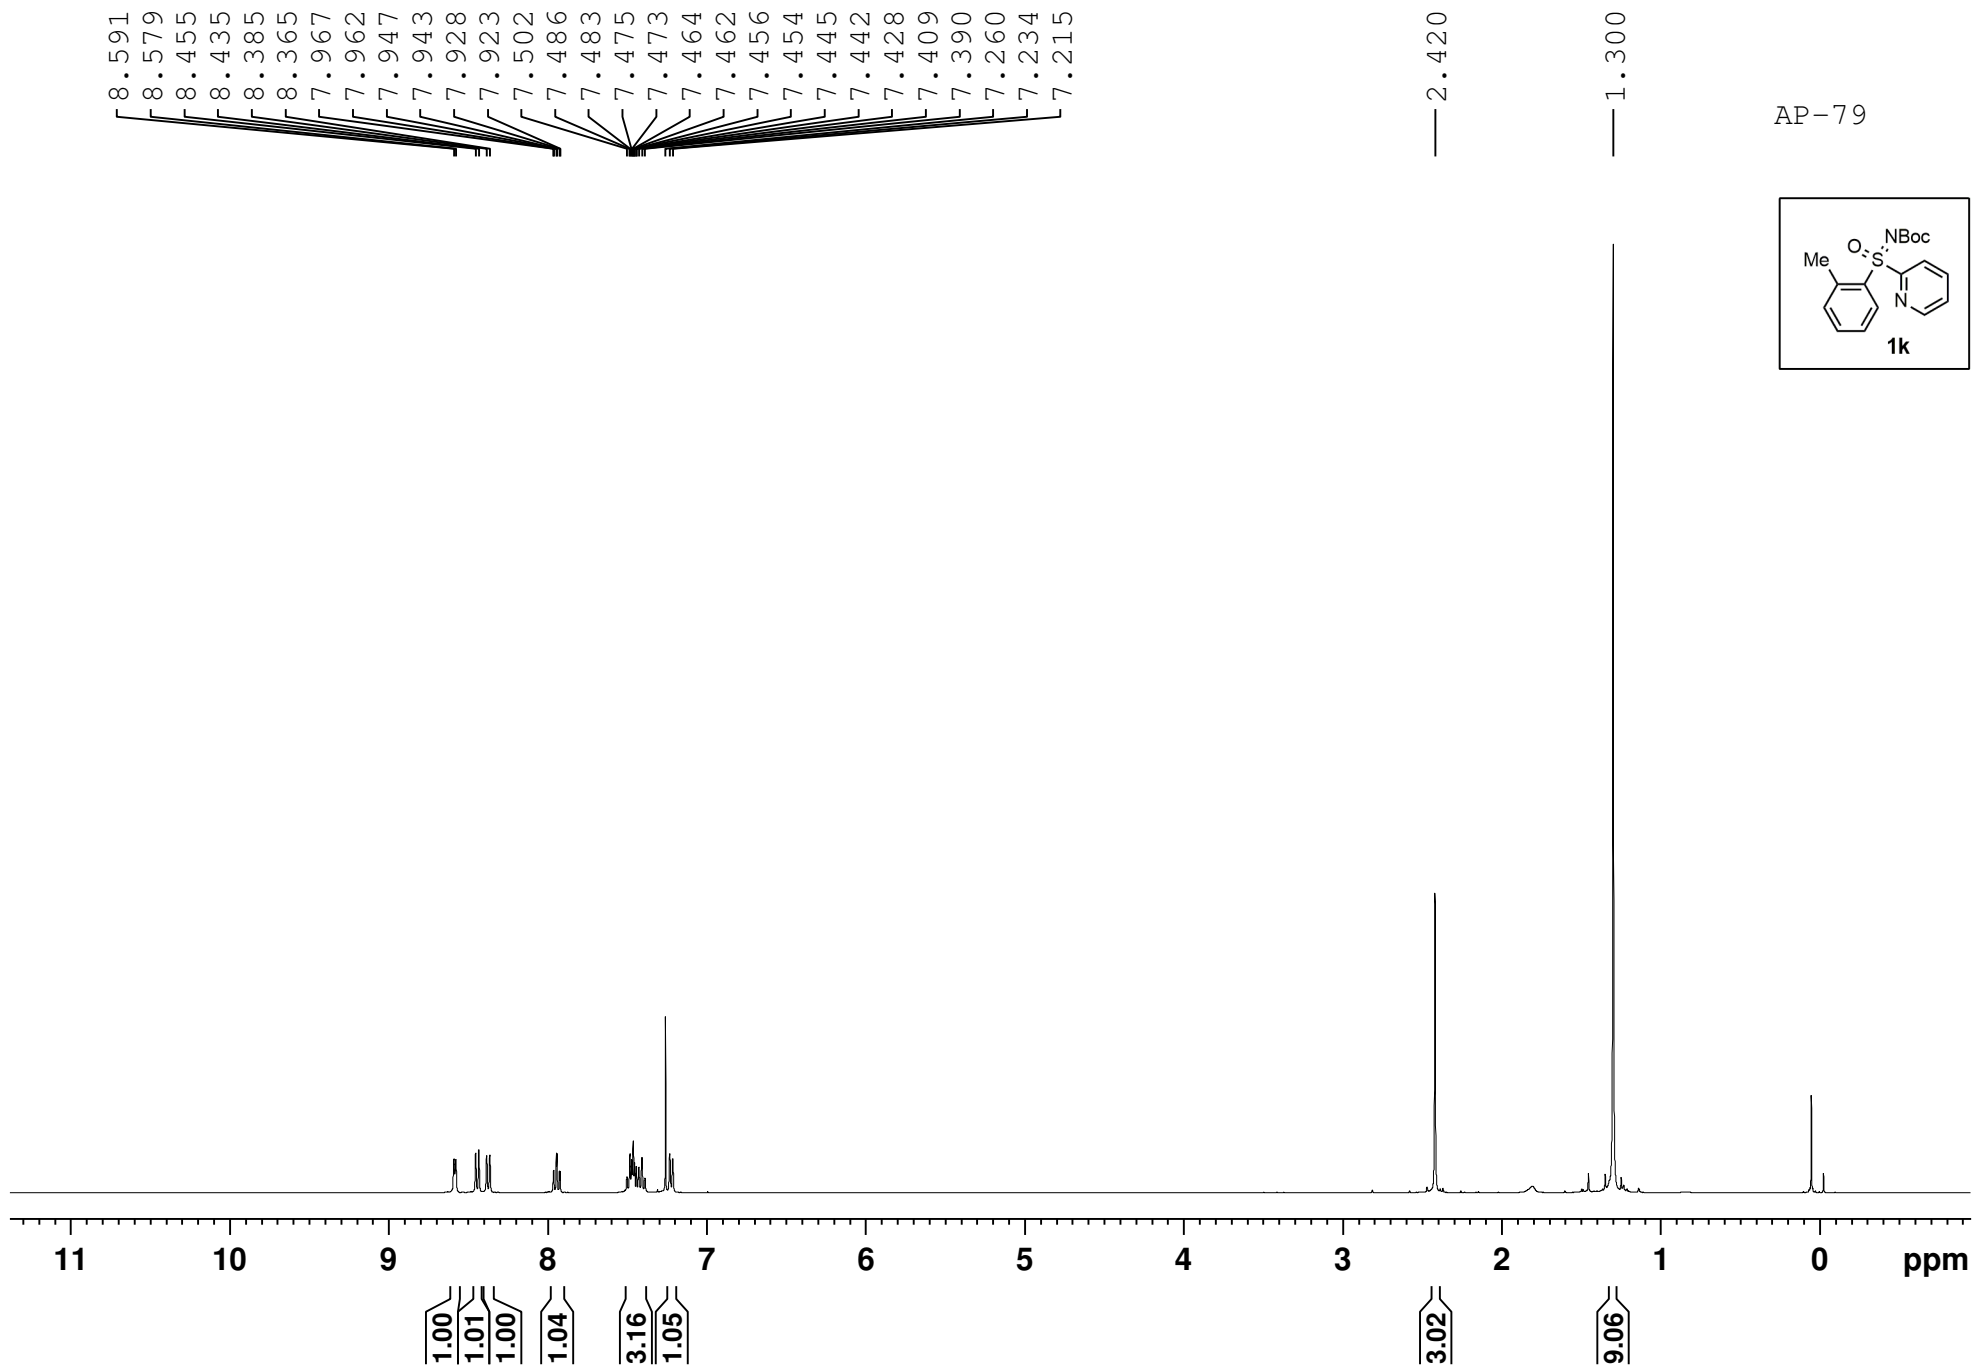

AP-79

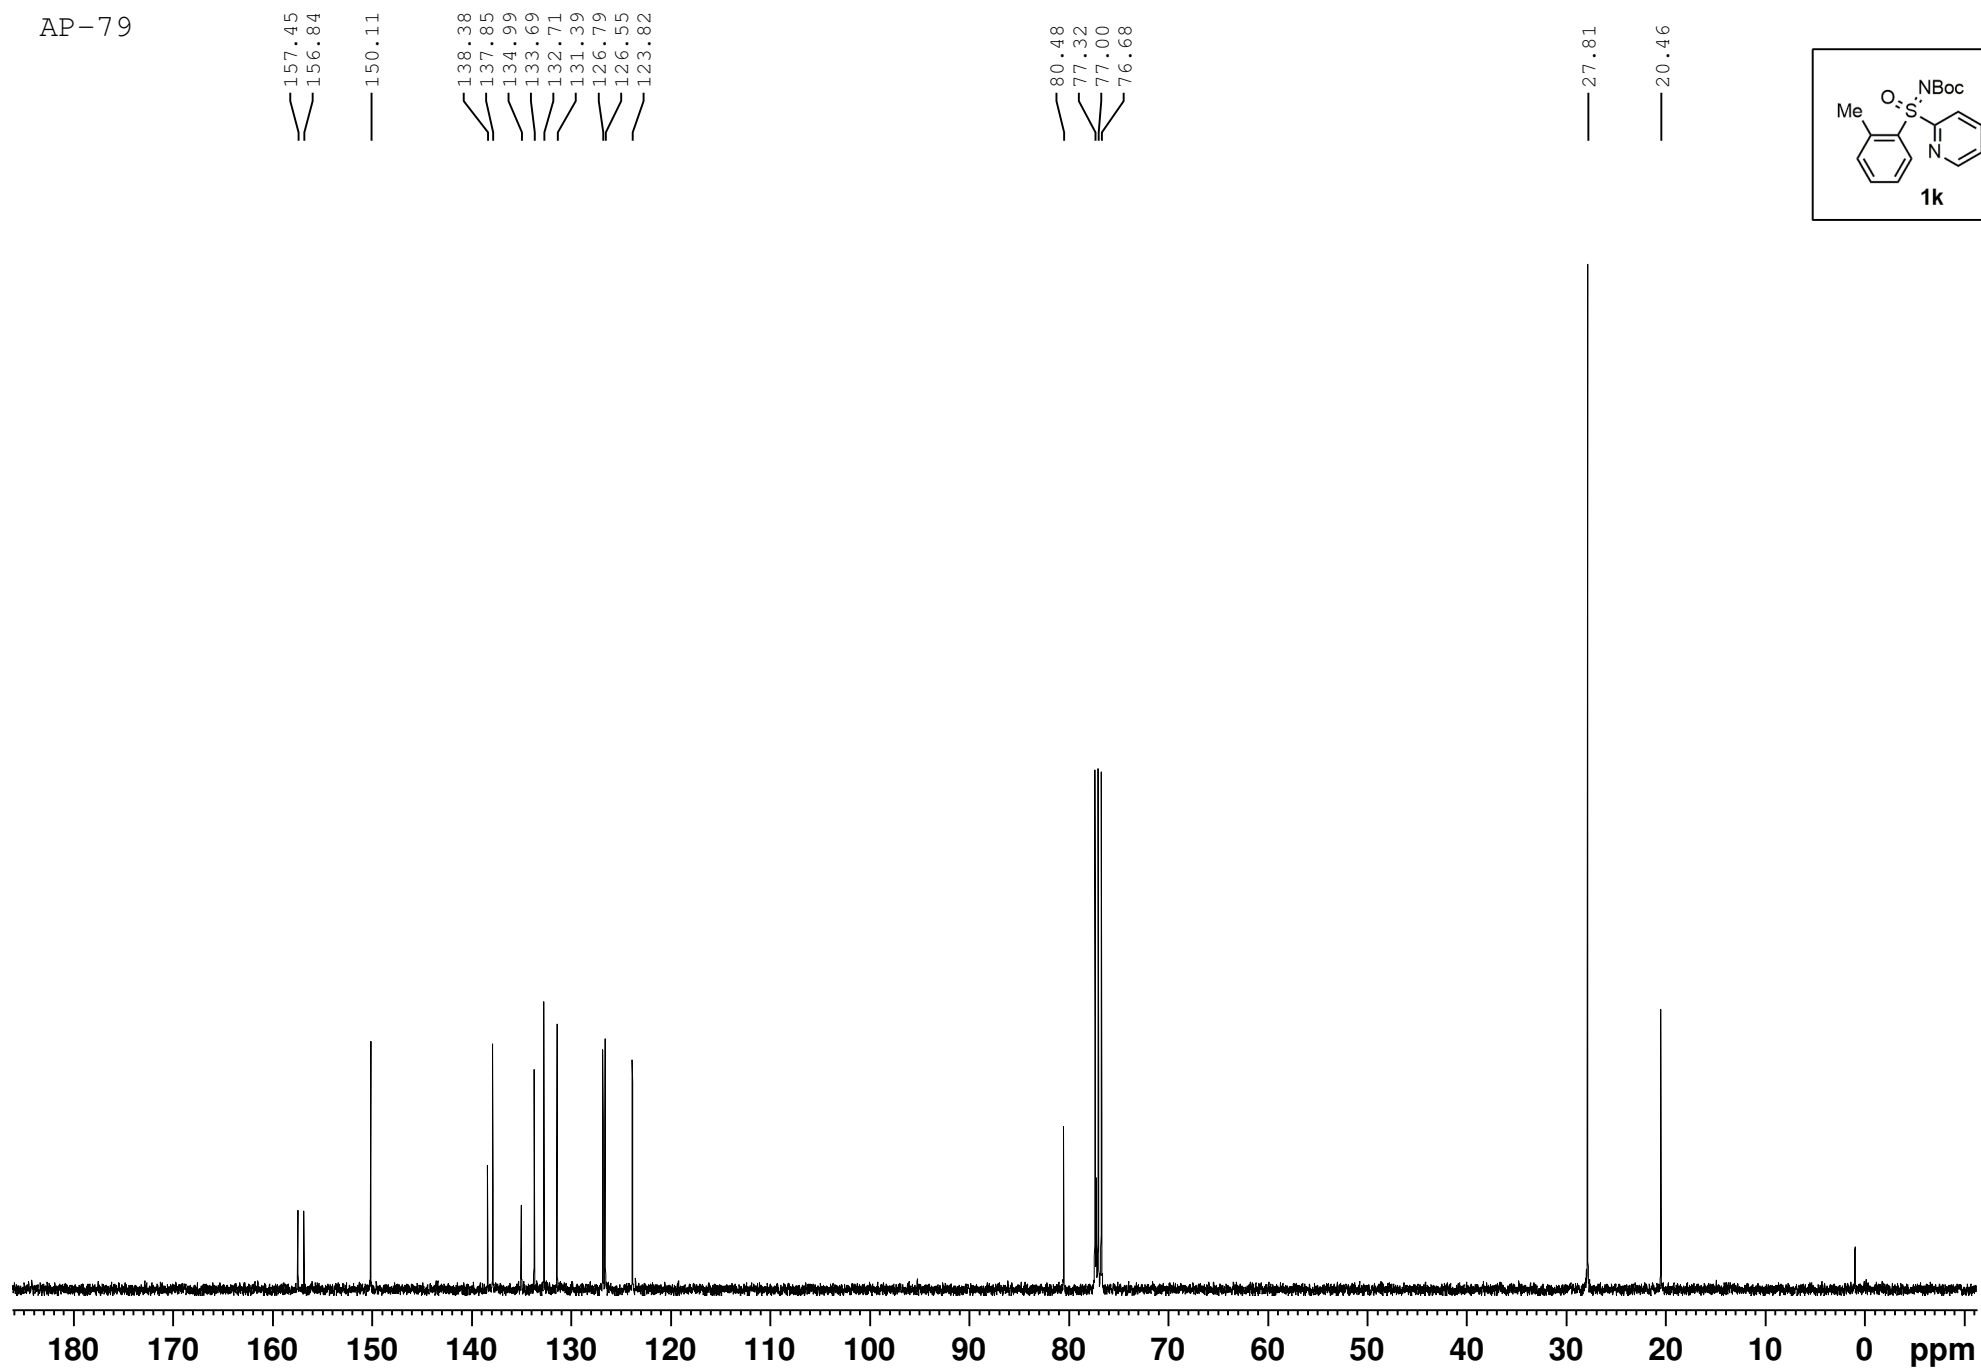

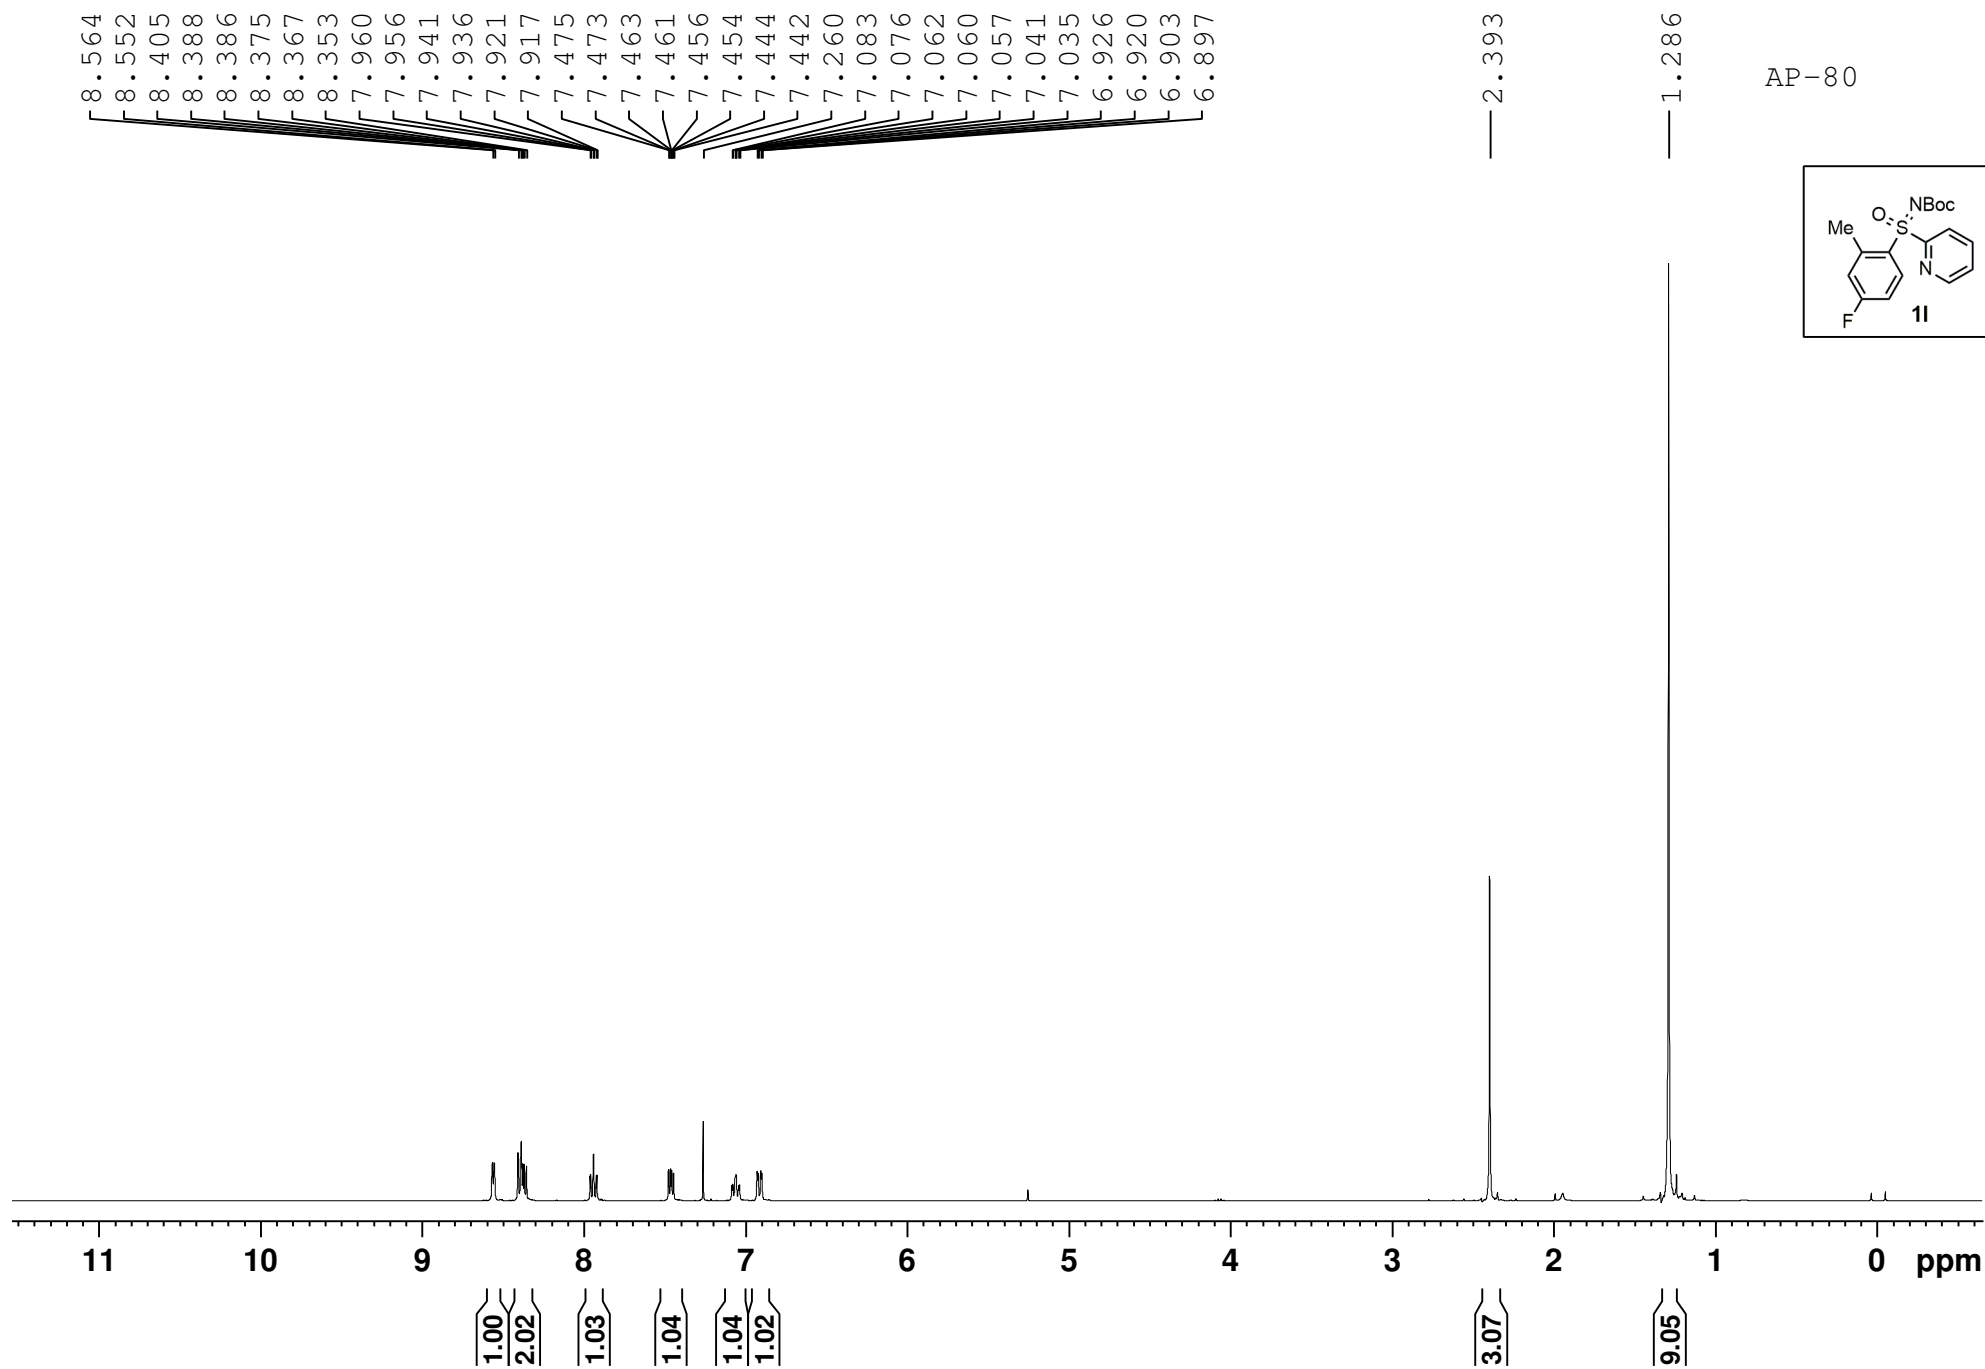

AP-80

AP-80

166.67  
164.12  
157.17  
156.65  
150.06  
141.88  
141.79  
137.92  
134.40  
134.30  
130.58  
126.89  
123.65  
119.62  
119.40  
113.71  
113.49

80.50  
77.31  
77.00  
76.68

27.73  
20.55

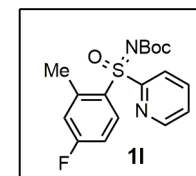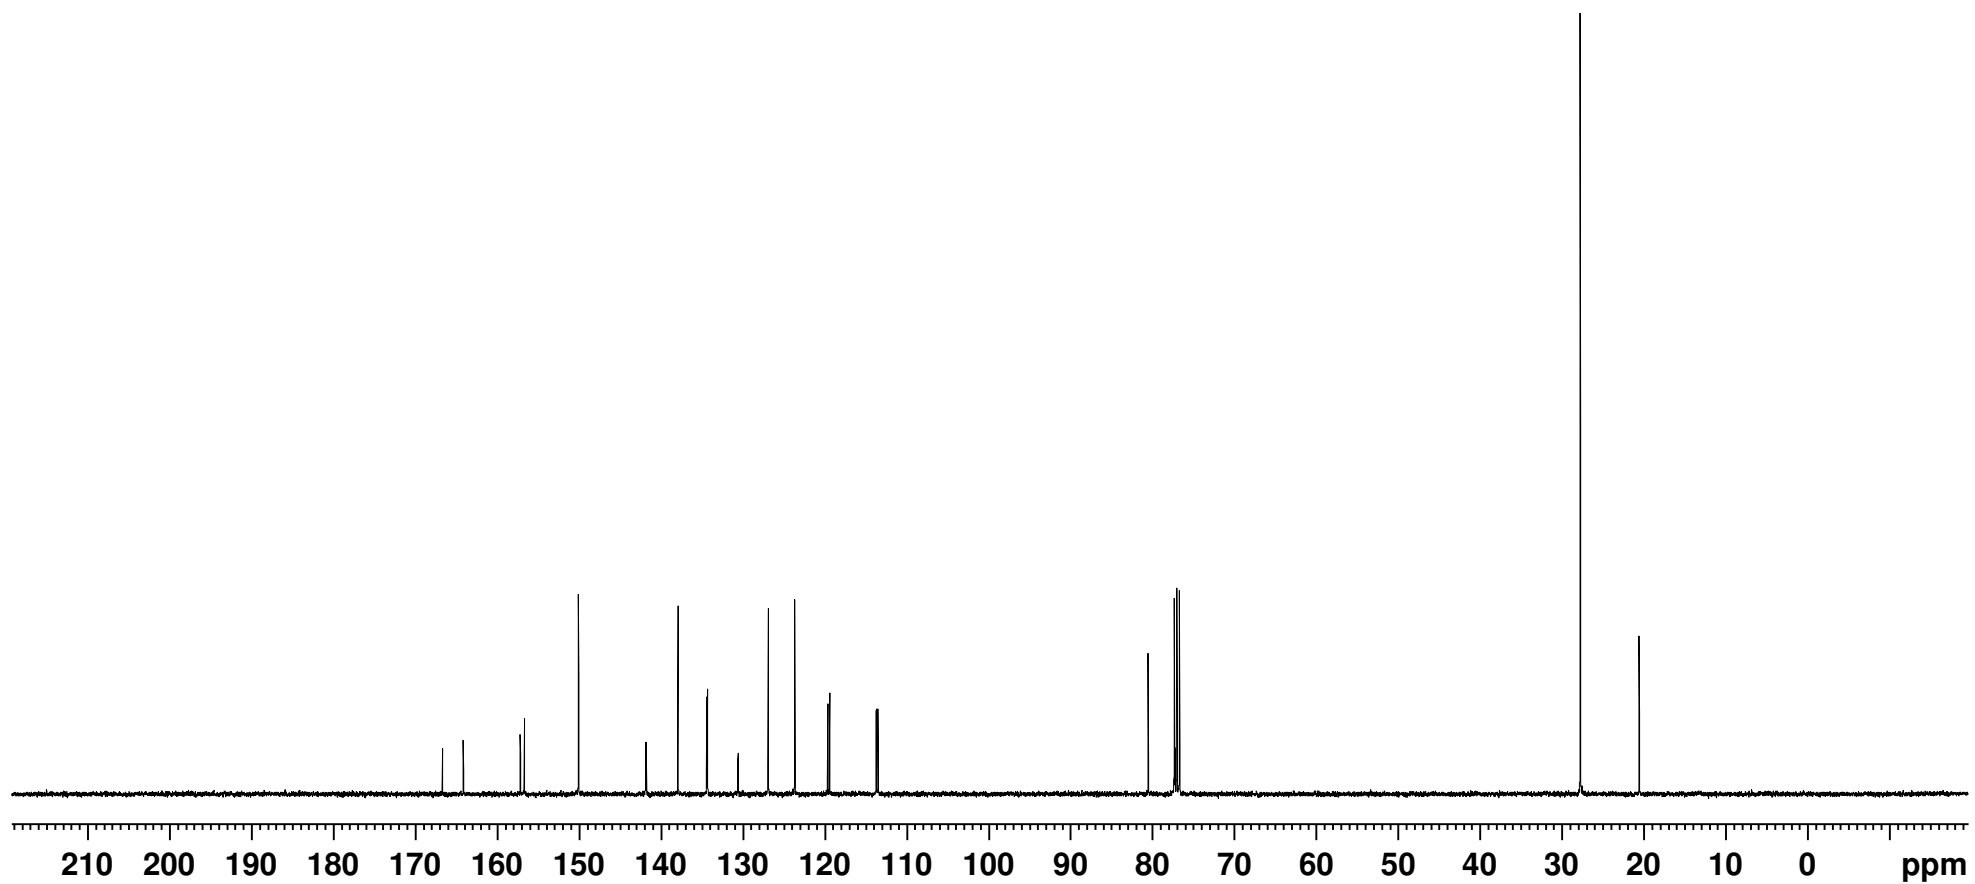

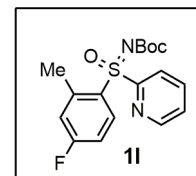

AP-80

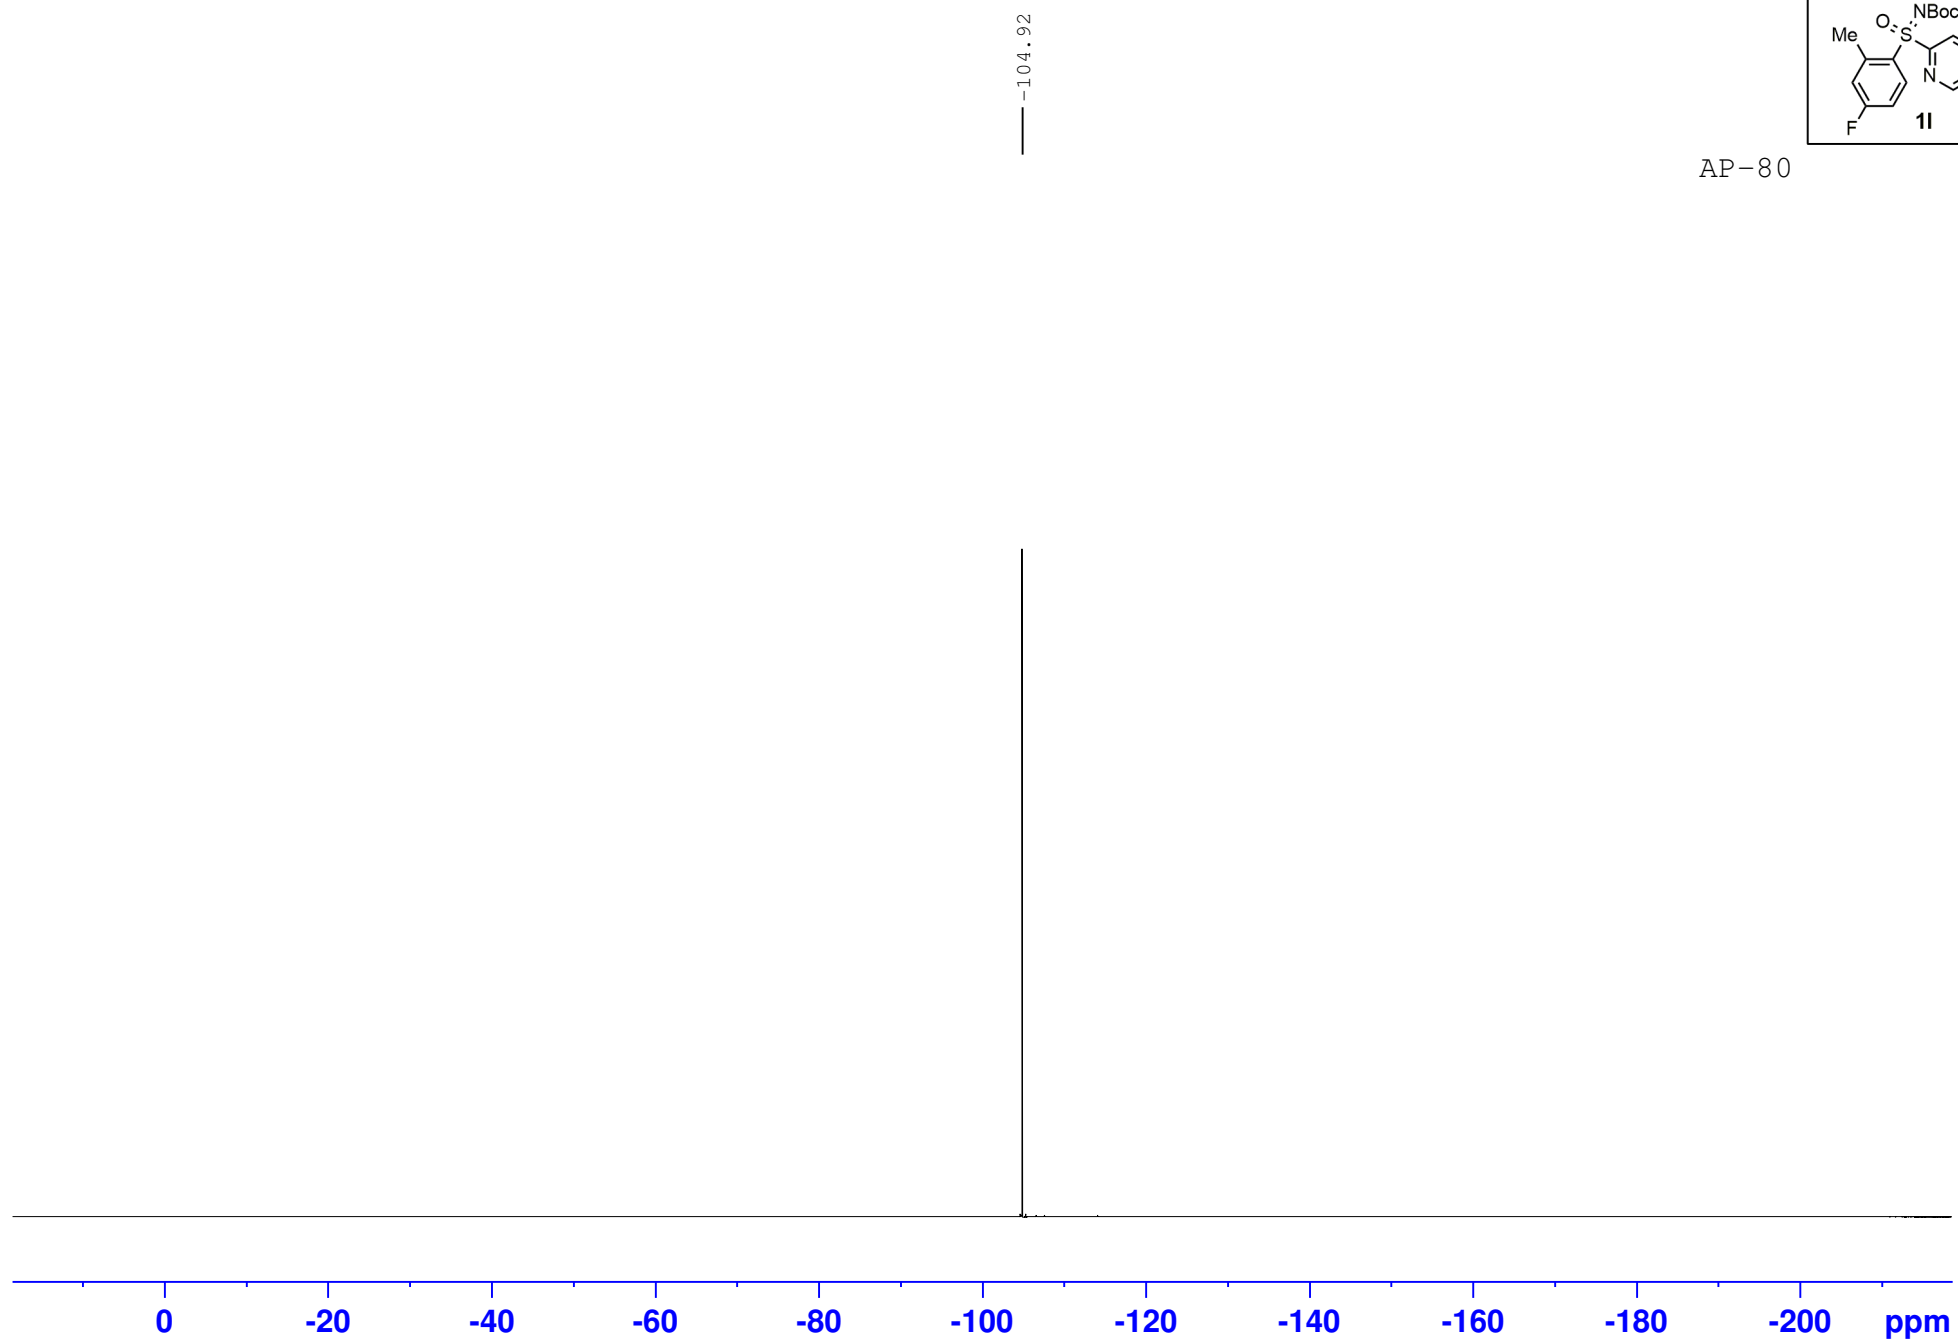

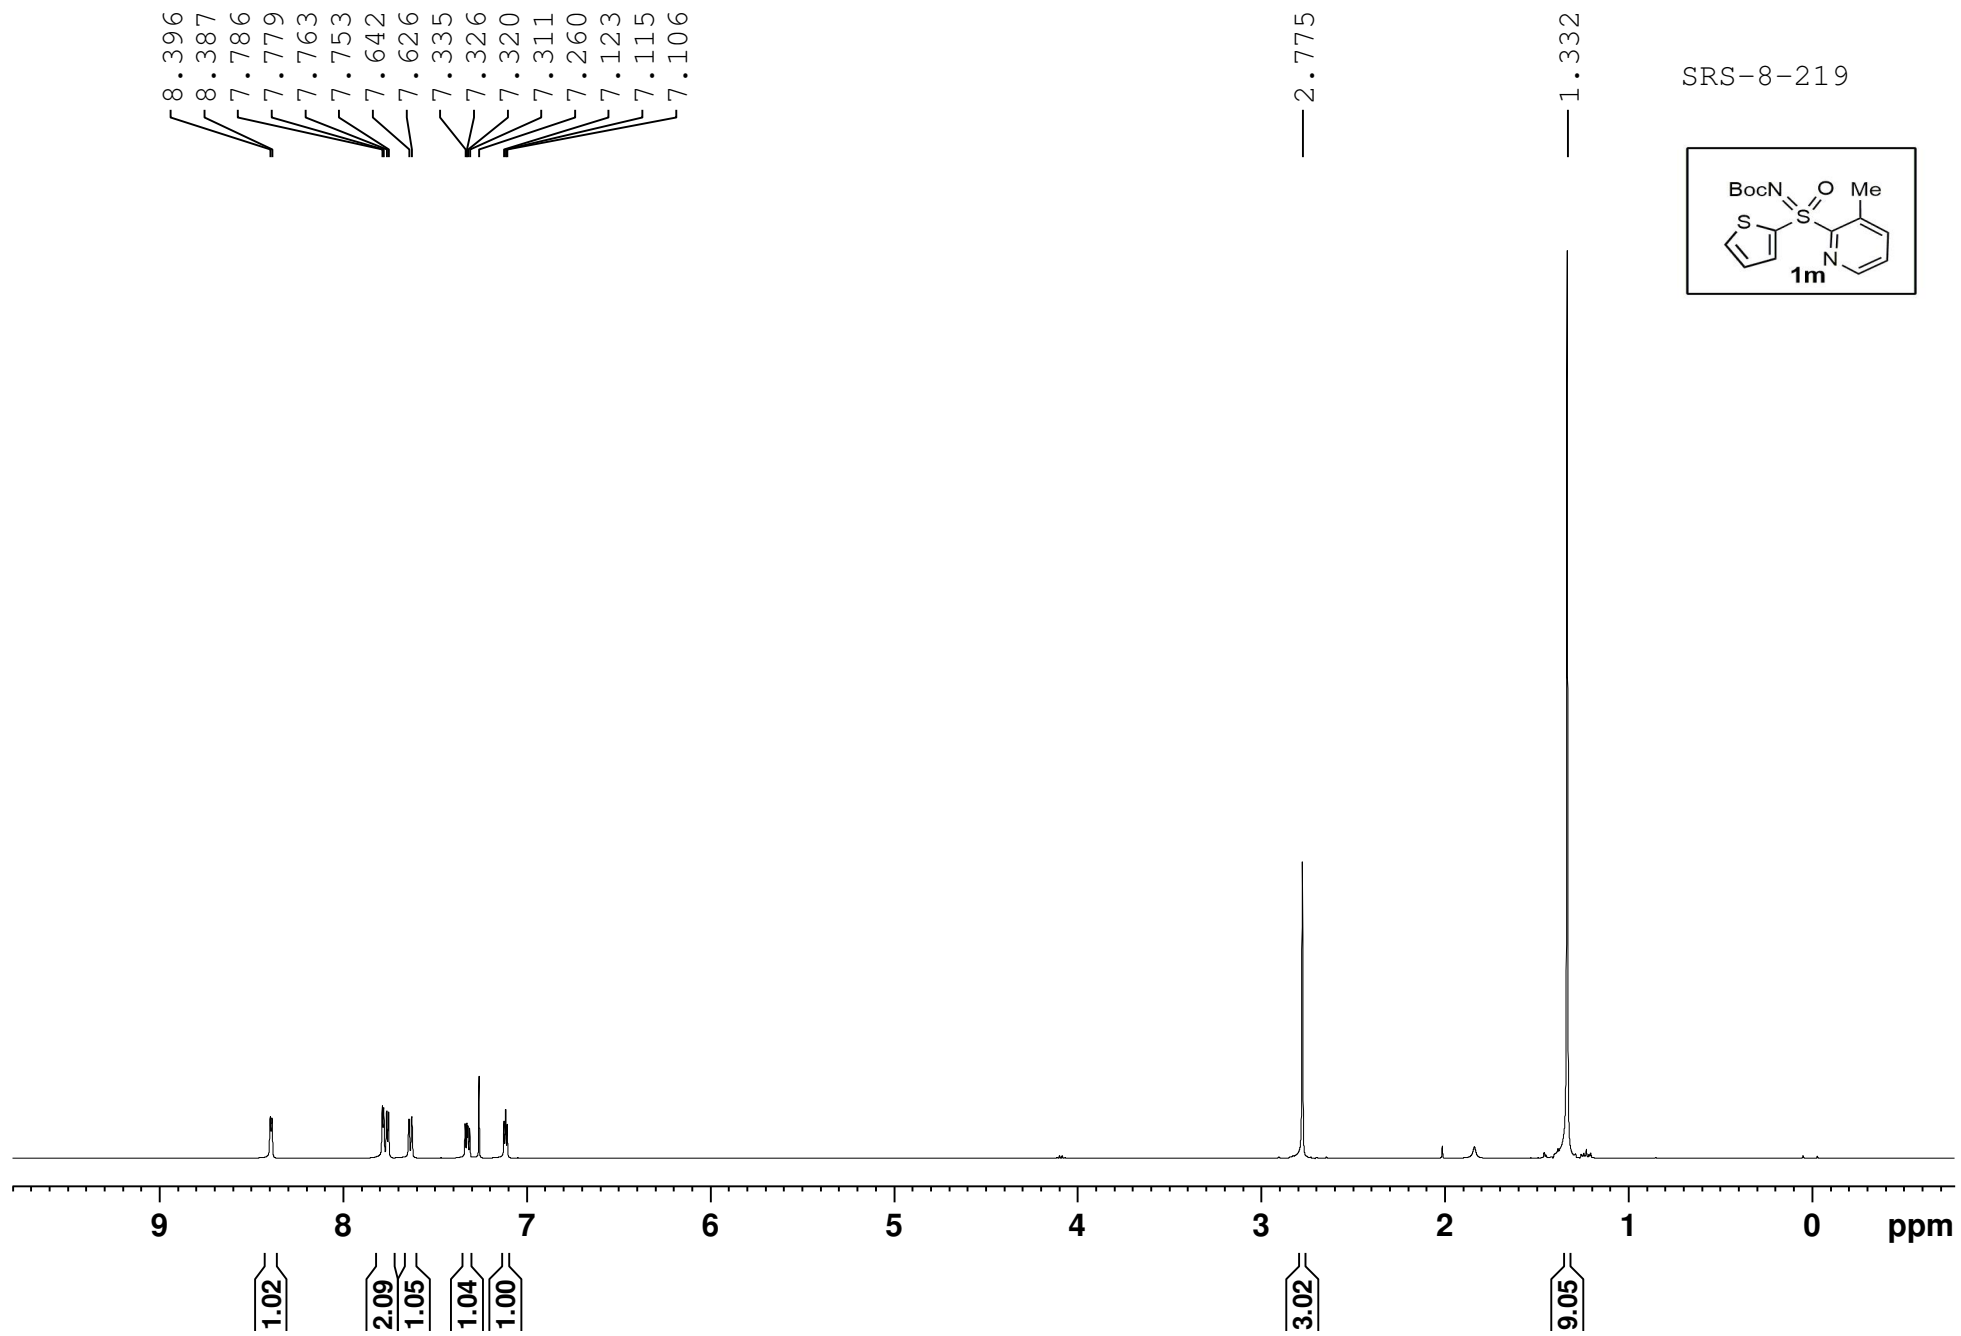



SRS-8-219

157.05  
155.36  
146.47  
141.76  
137.34  
135.74  
135.43  
134.68  
127.62  
126.65

80.57  
77.32  
77.00  
76.68

27.83

19.18

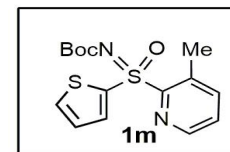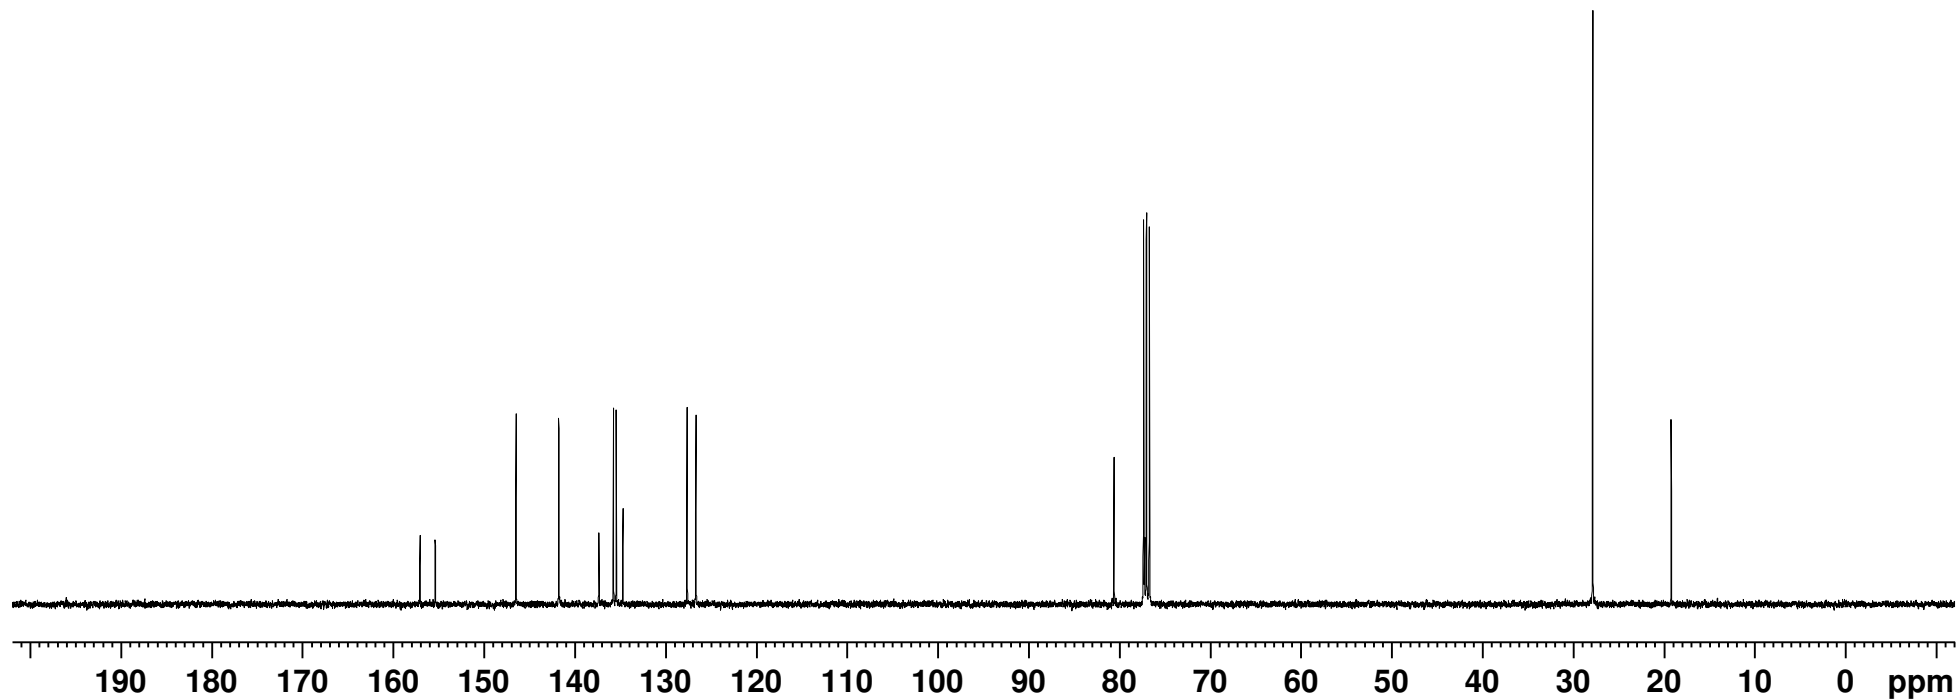

K-9-L9

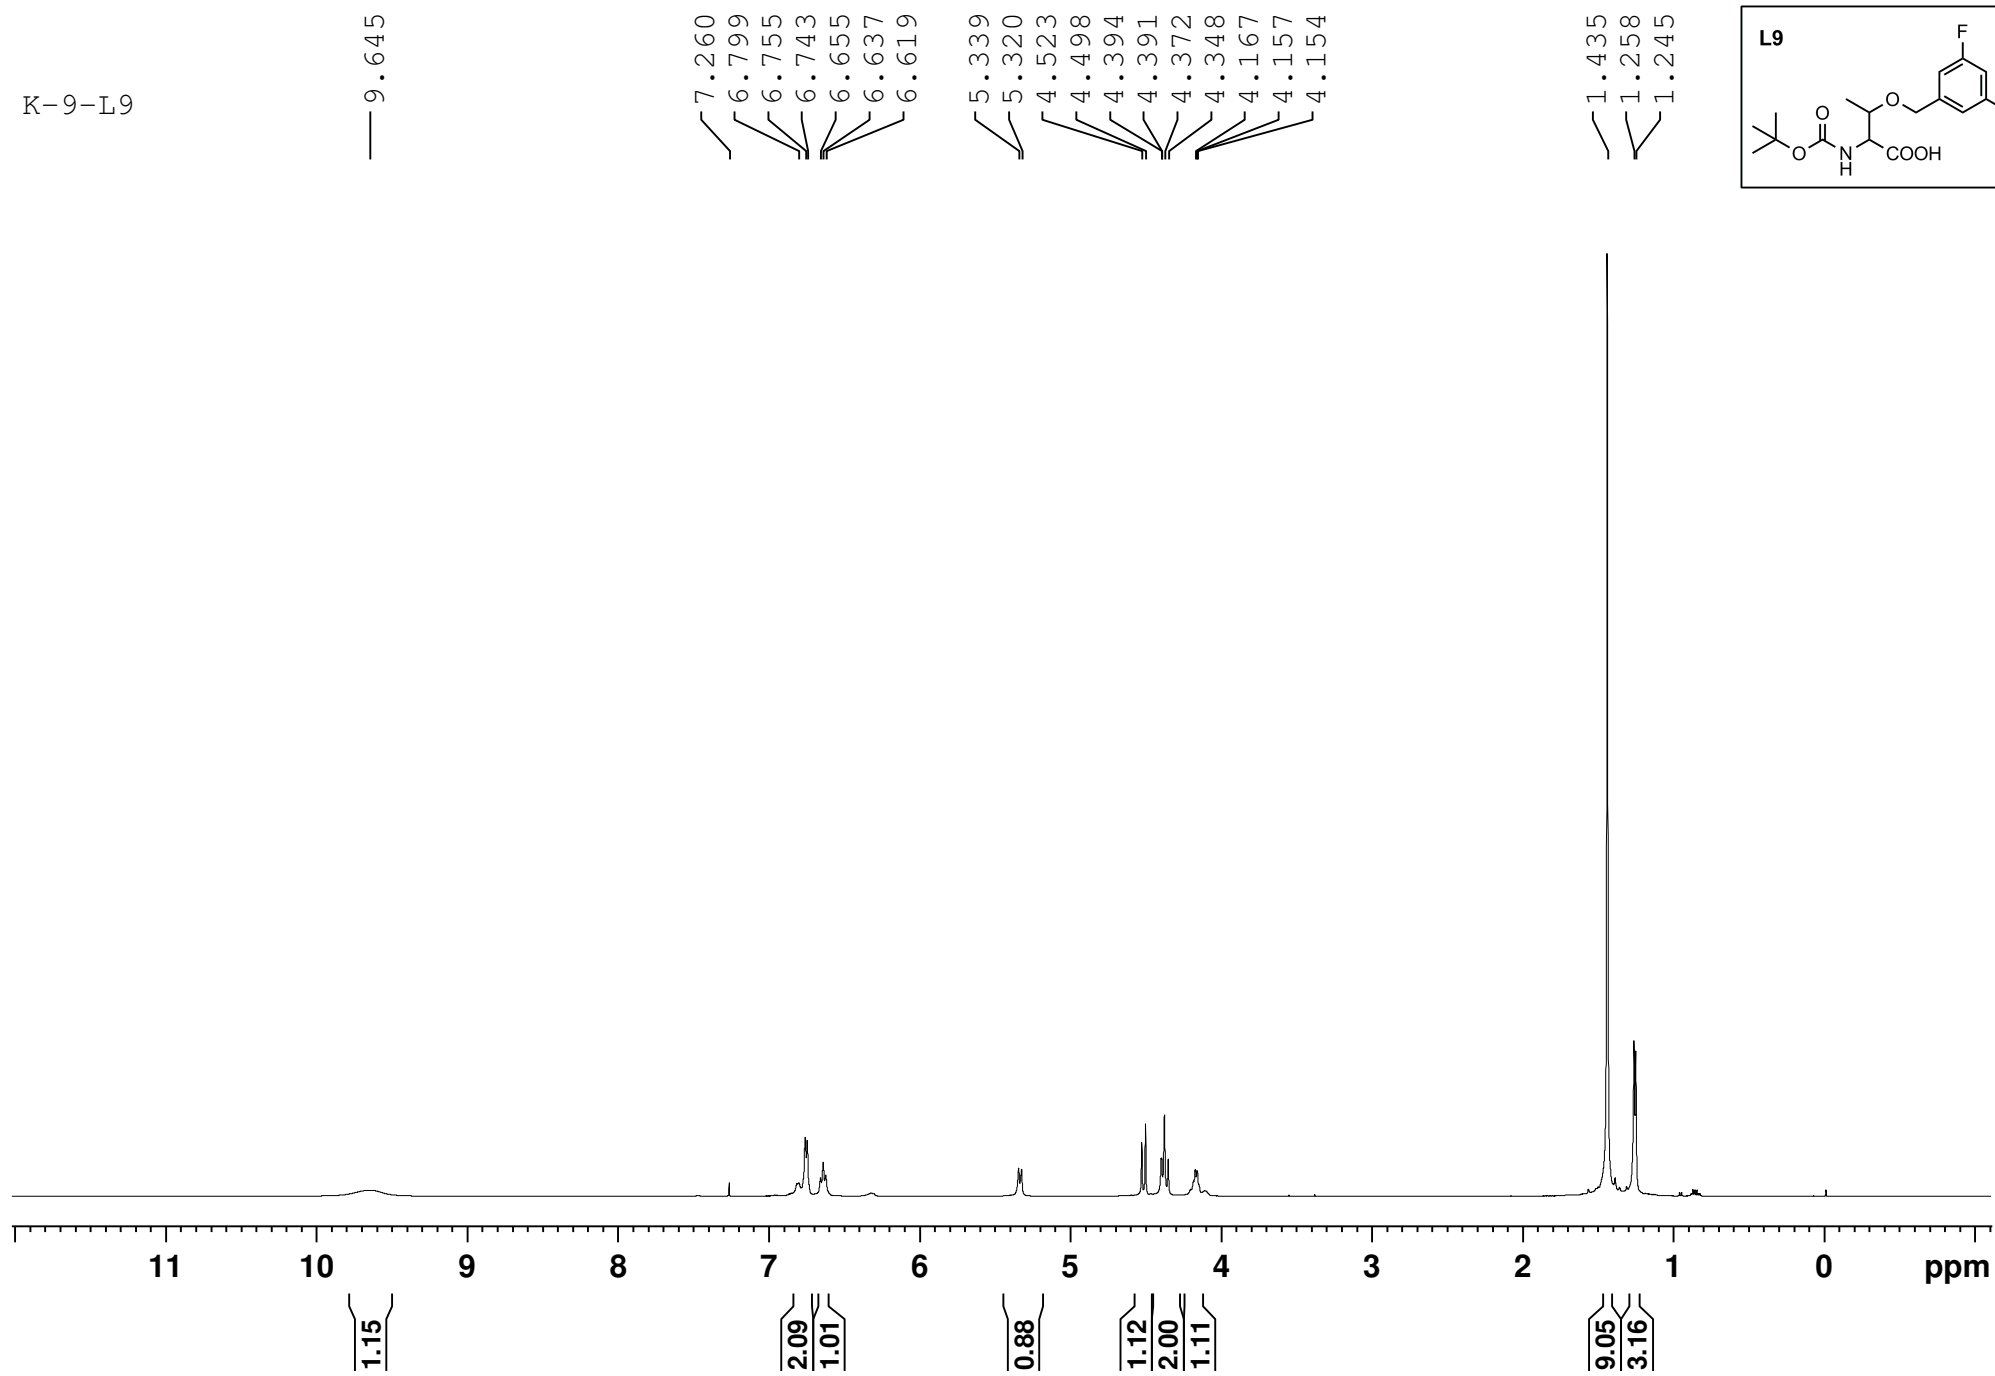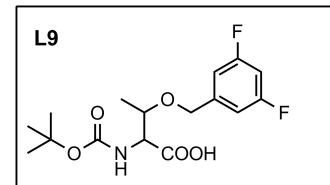

K-9-L9

175.63

164.17

164.04

161.70

161.57

156.26

142.05

141.97

141.88

109.91

109.85

109.73

109.66

103.03

102.78

102.53

80.33

77.31

77.00

76.68

75.24

69.72

57.94

28.19

16.07

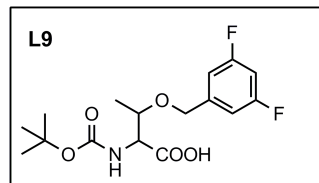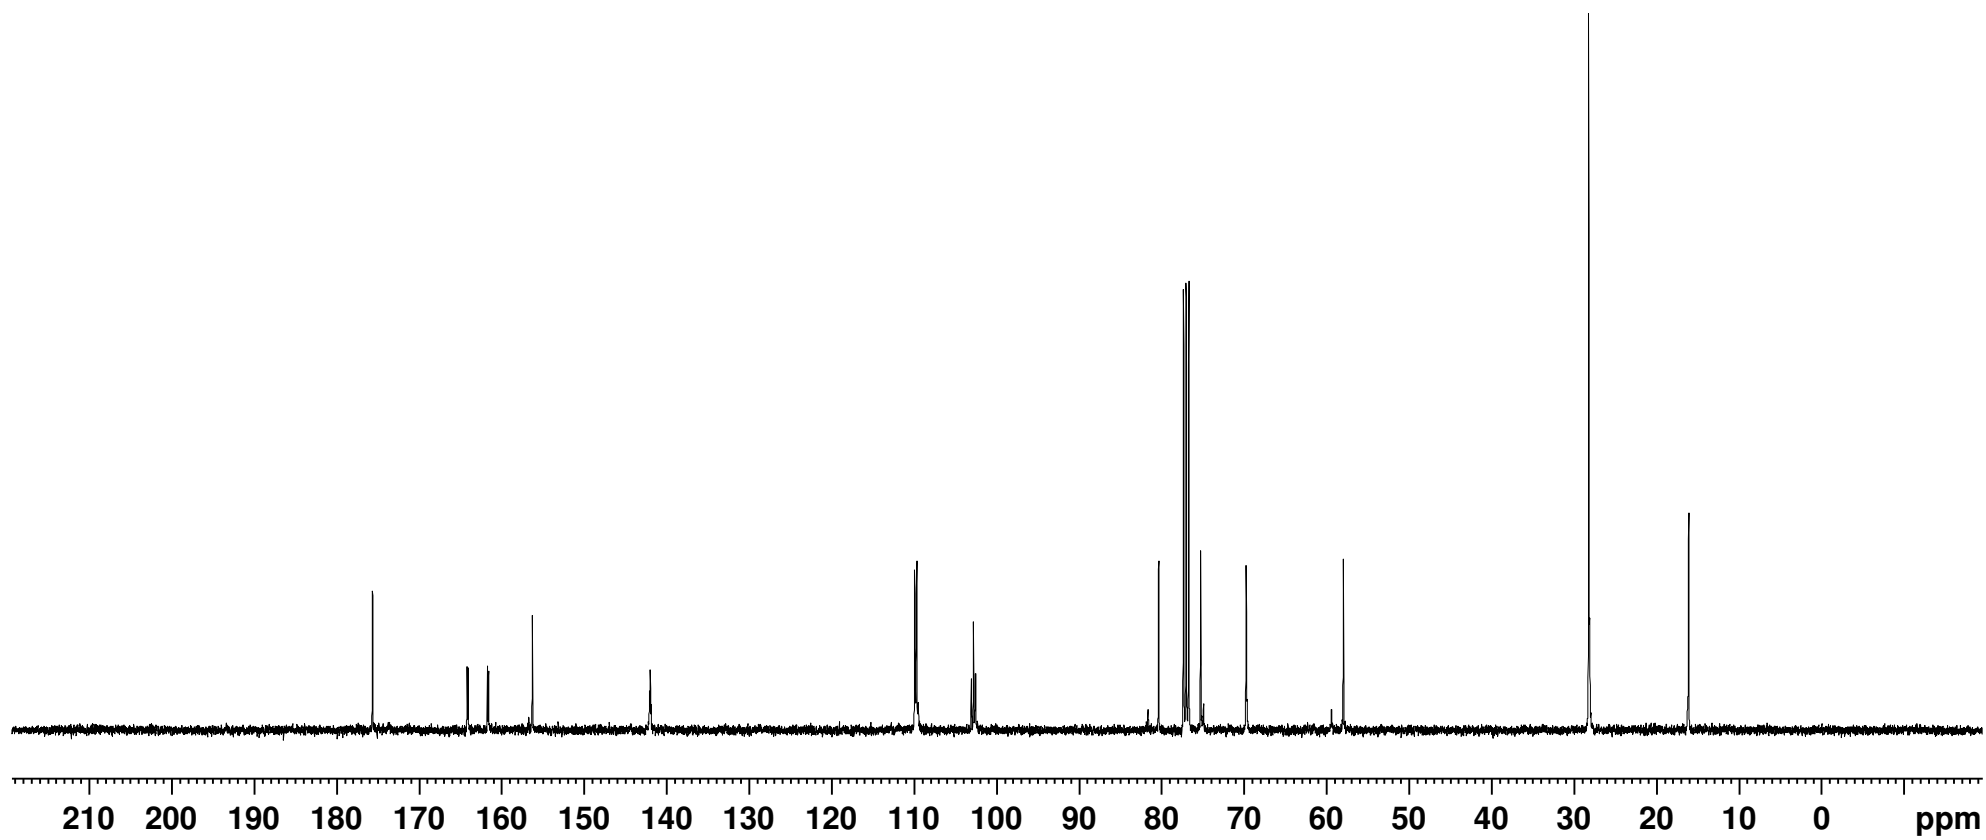

K-L9

-109.78

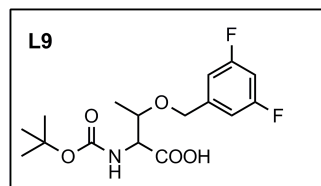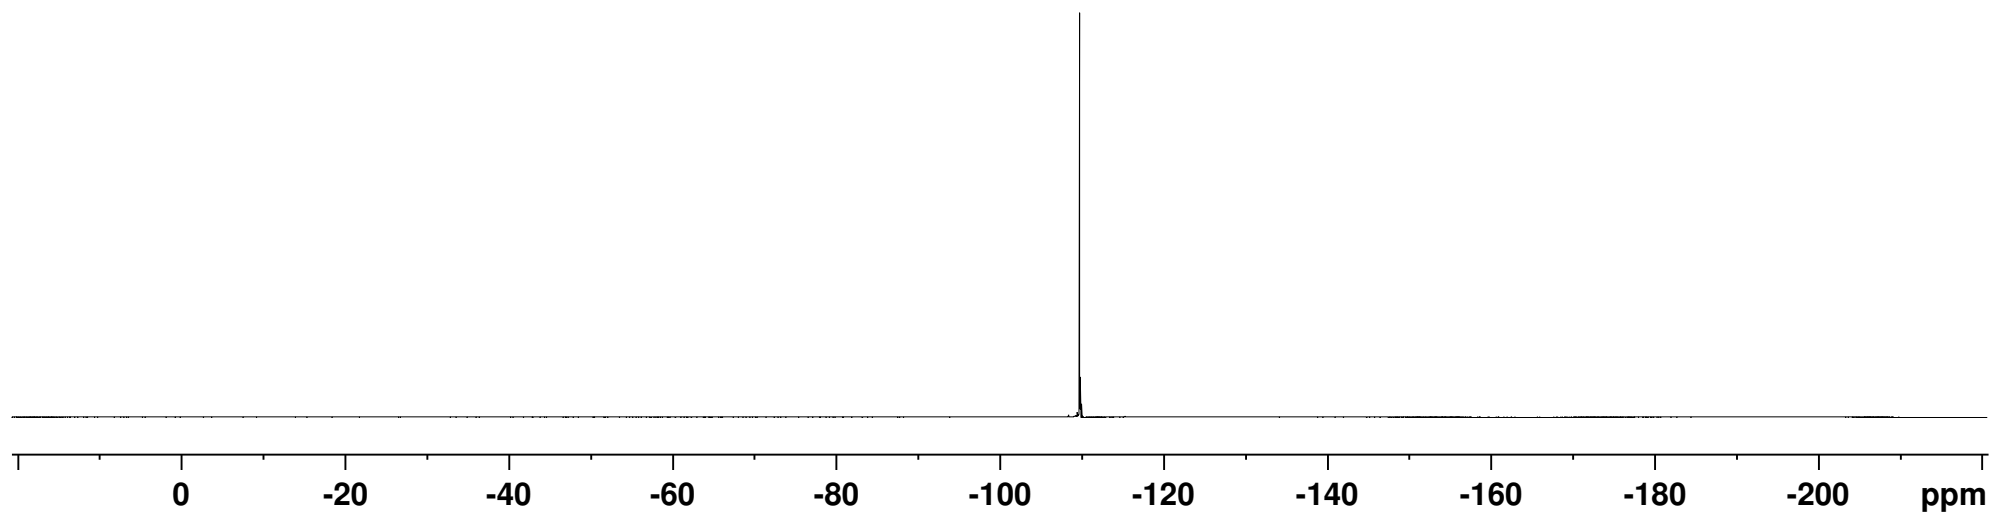

L10

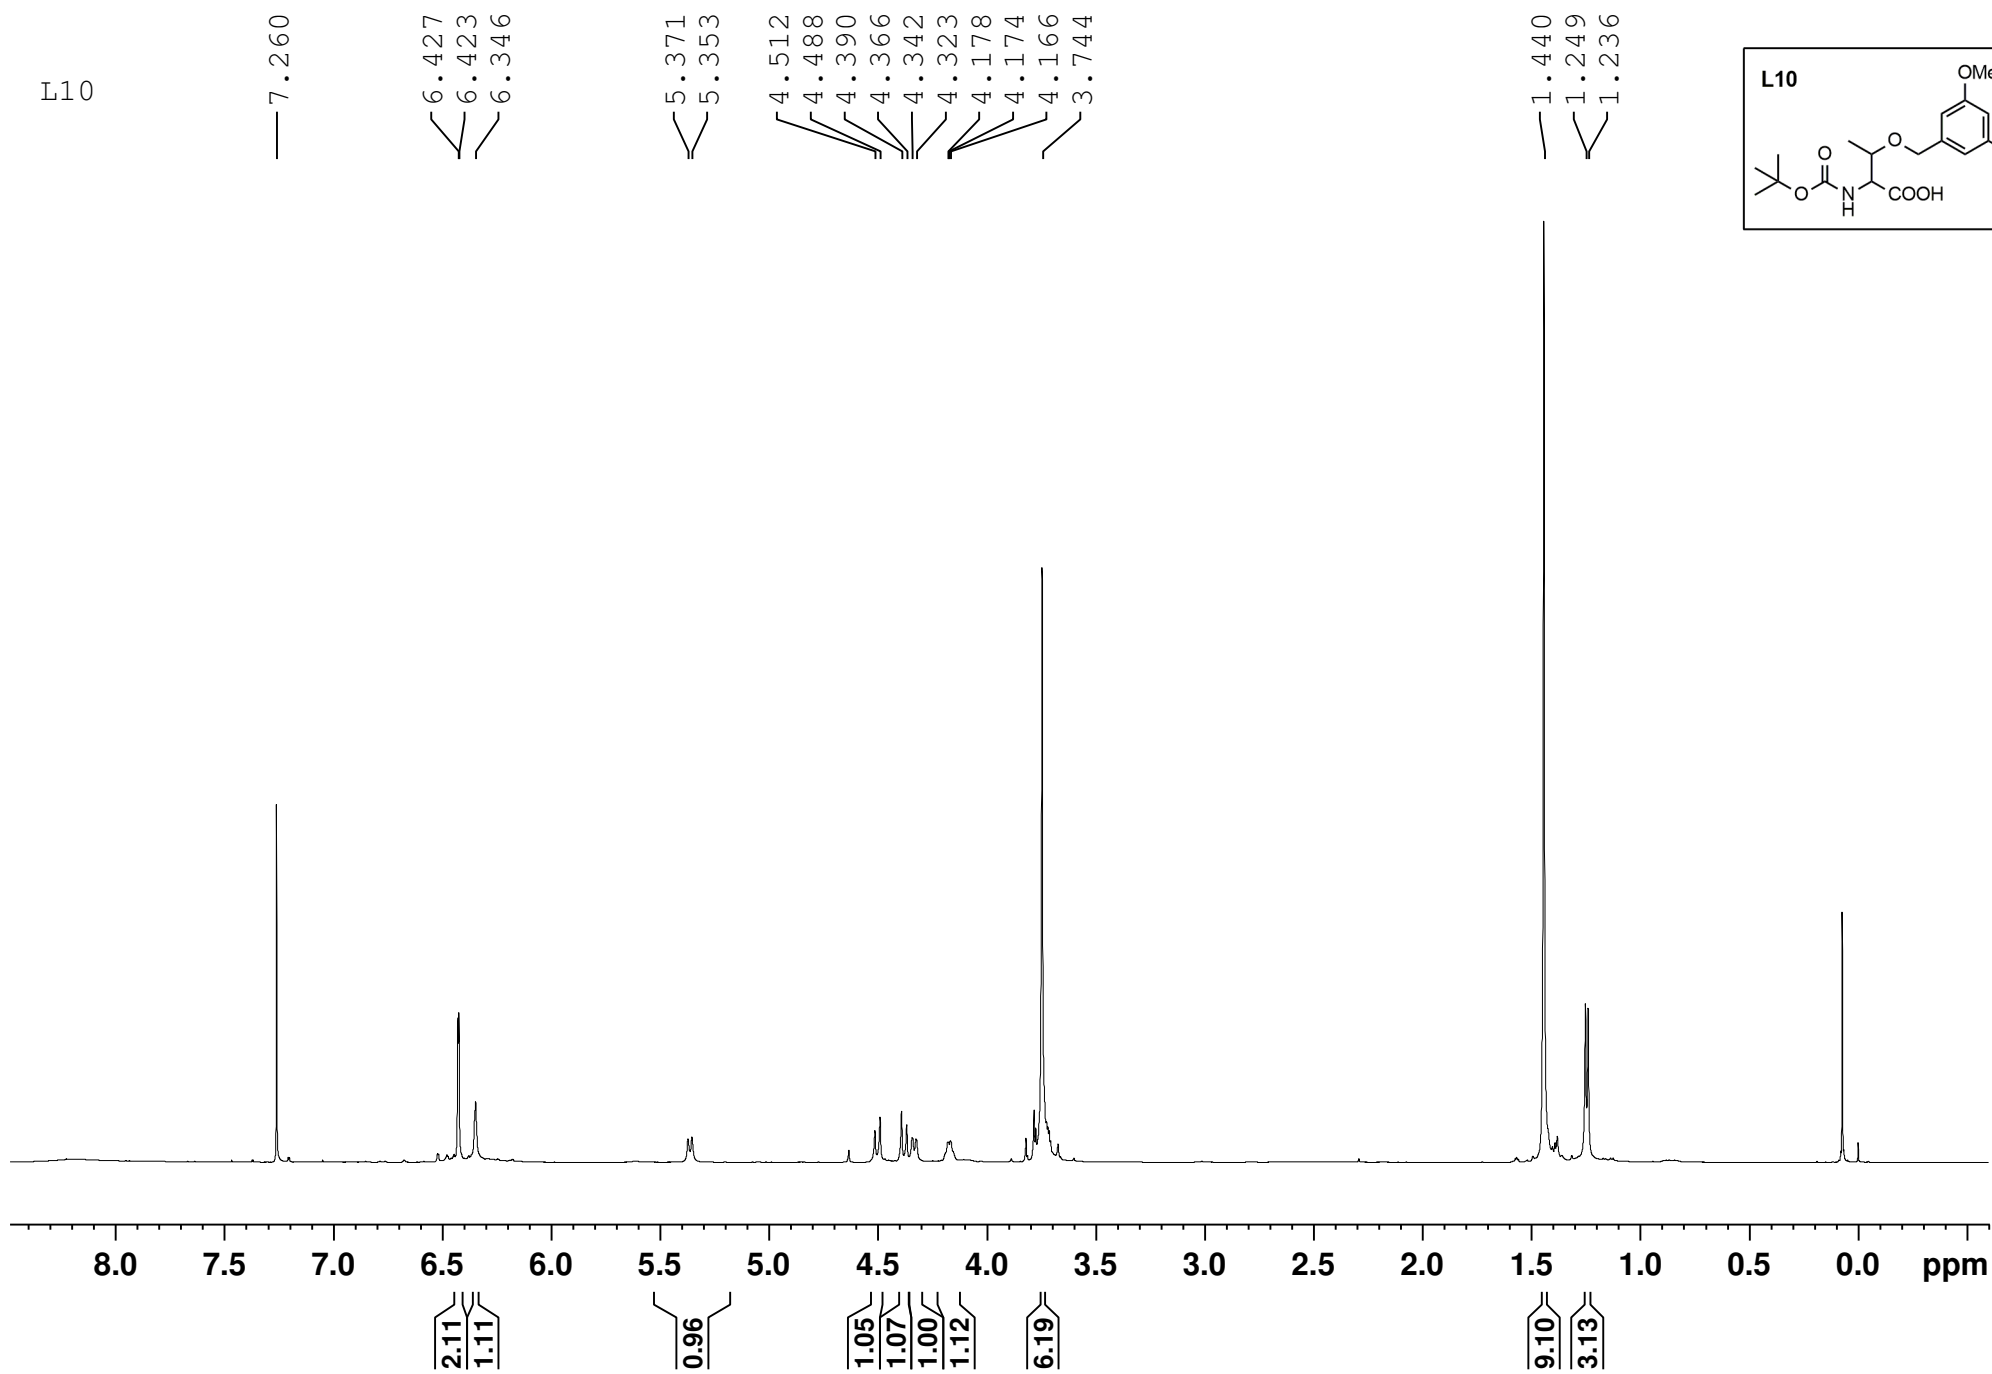

KALLOL-K -L1

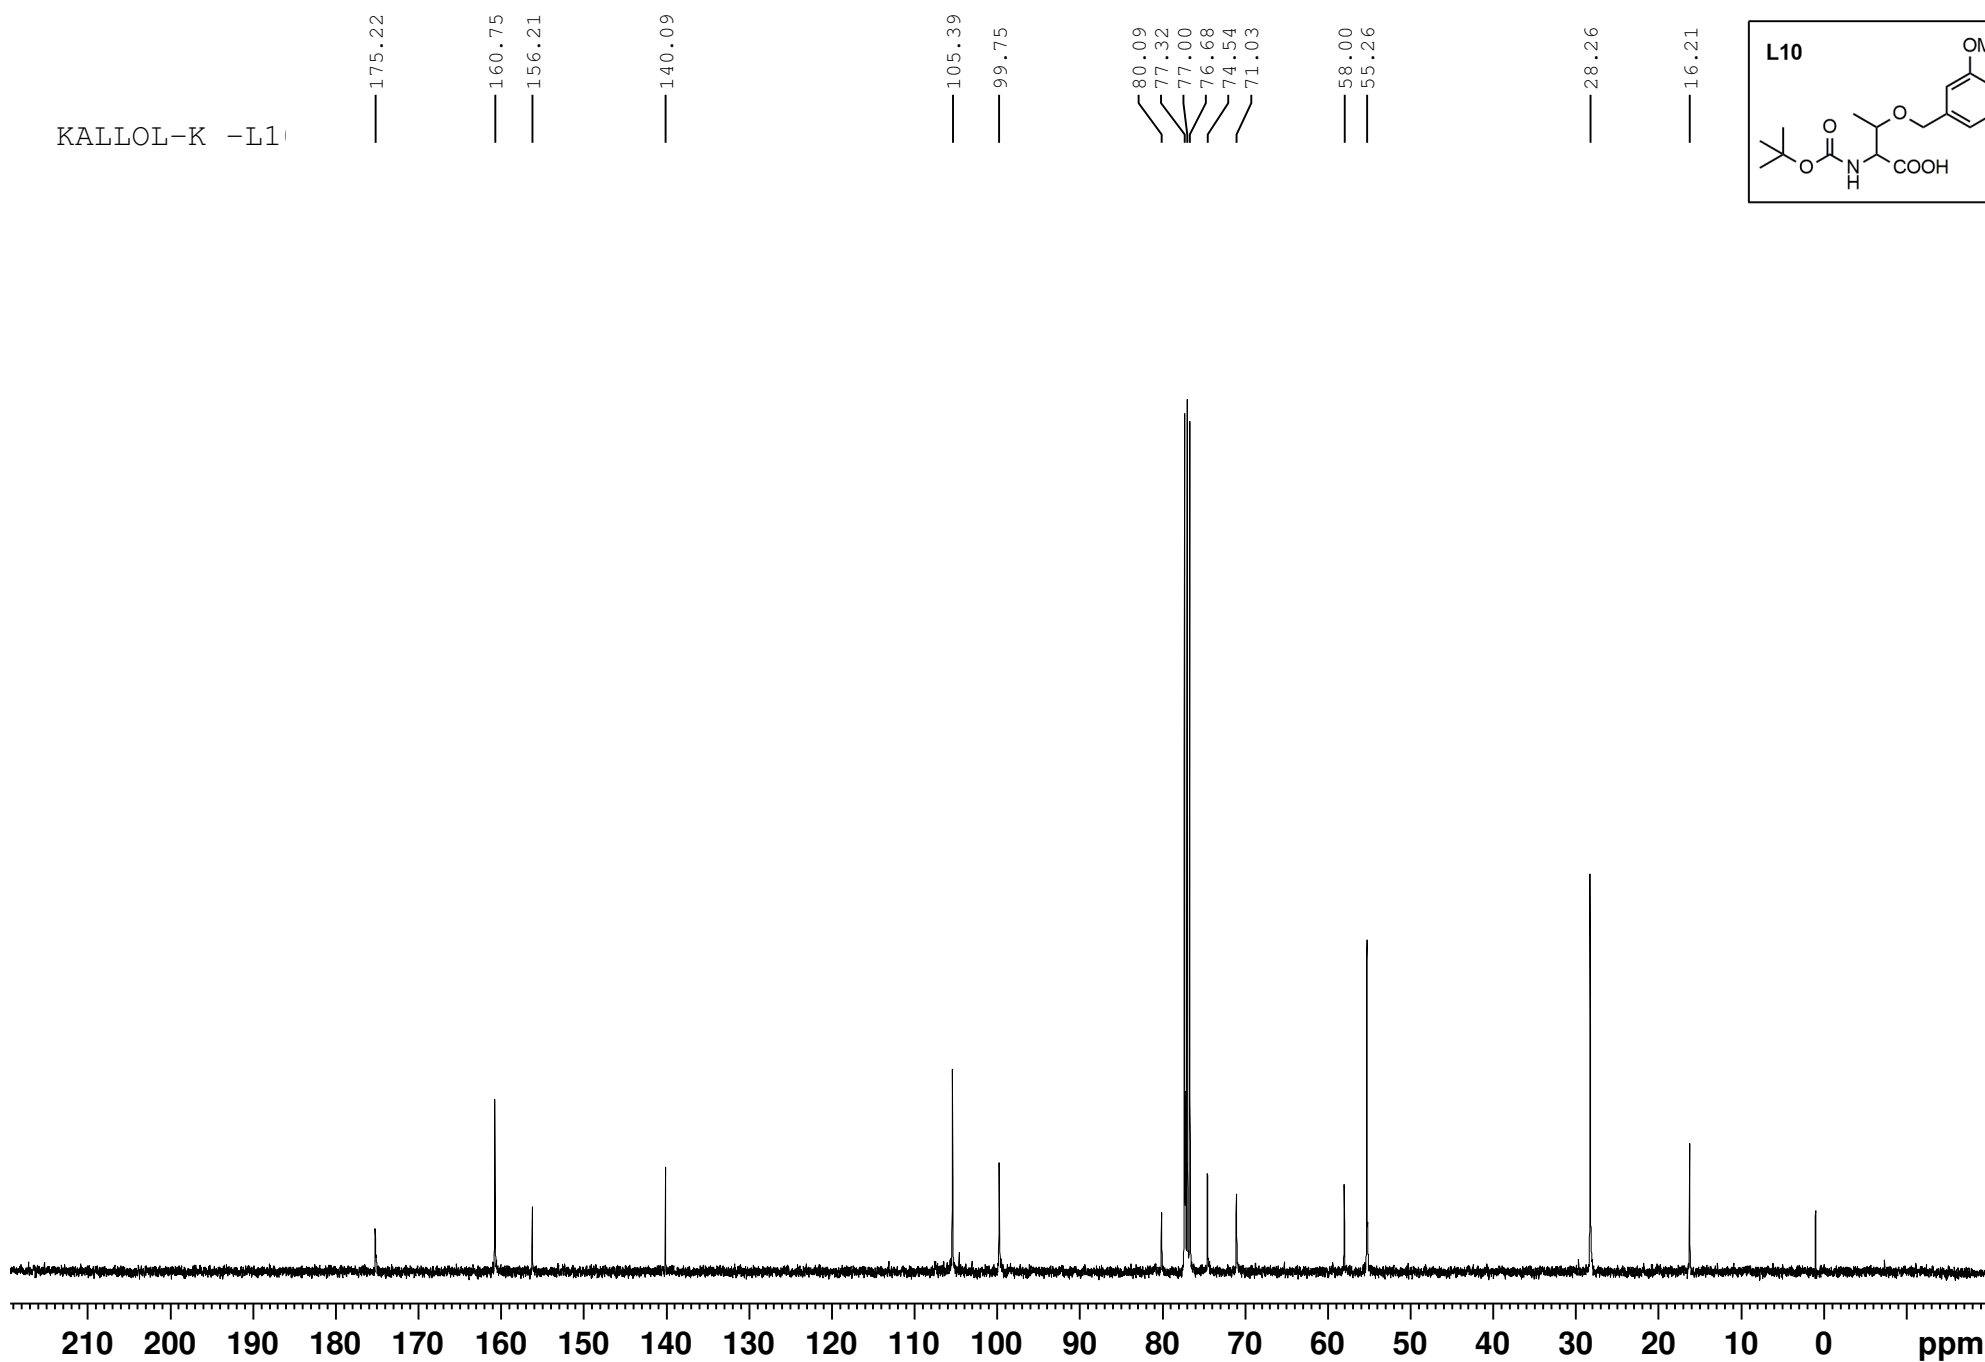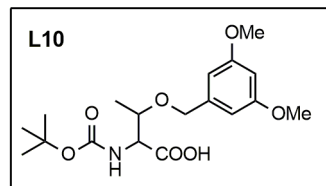

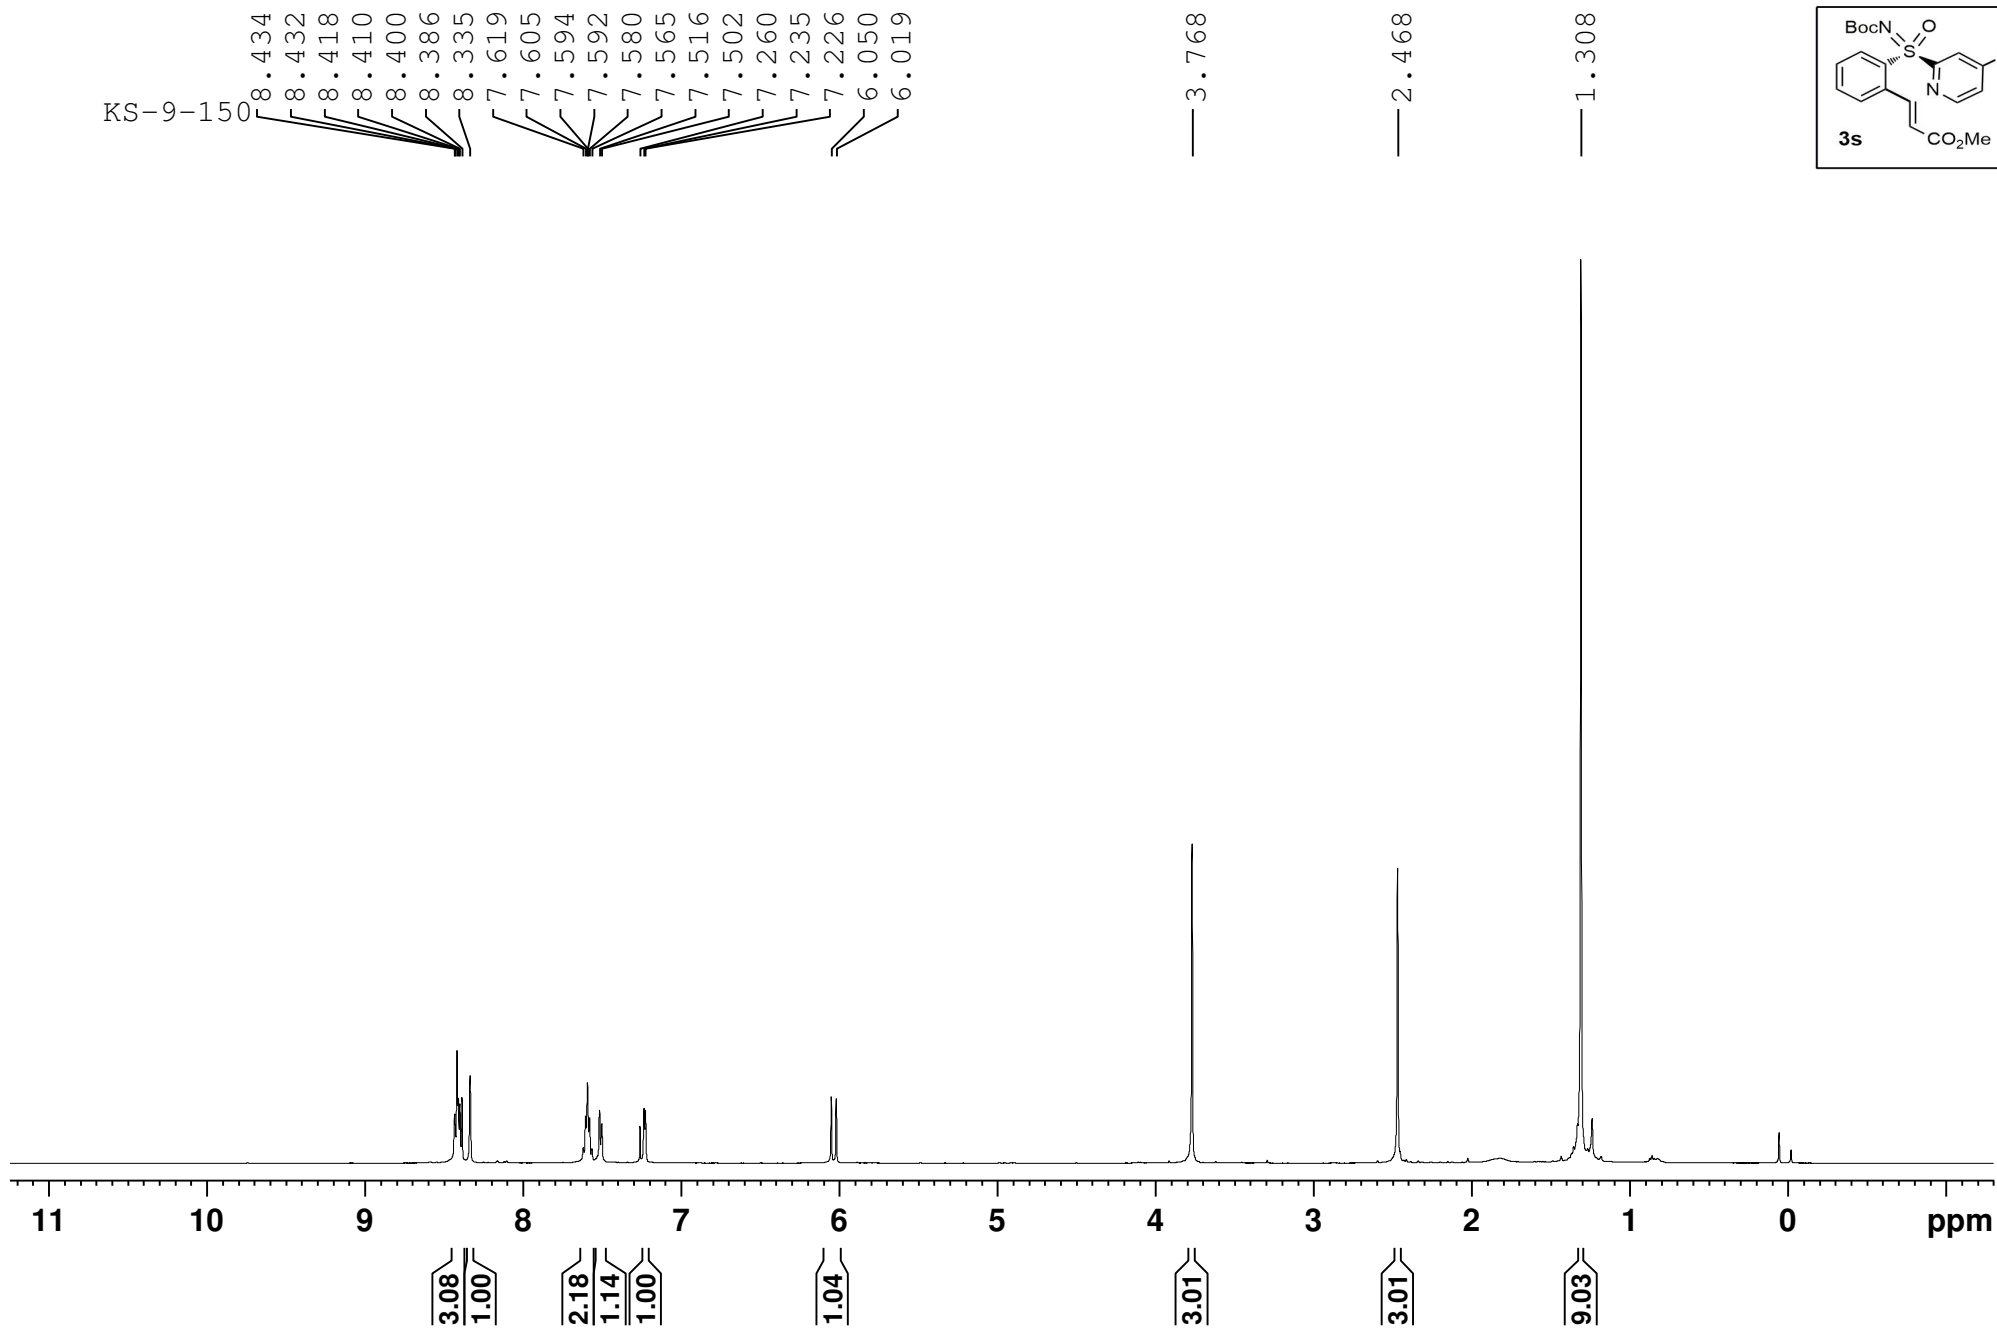

KS-9-150

166.06  
157.06  
156.67  
150.03  
149.91  
141.36  
135.92  
135.19  
133.82  
131.33  
129.81  
128.86  
127.73  
124.86  
122.18

80.63  
77.25  
77.00  
76.75

51.79

27.85

21.16

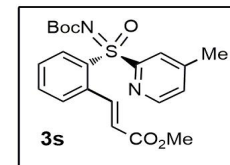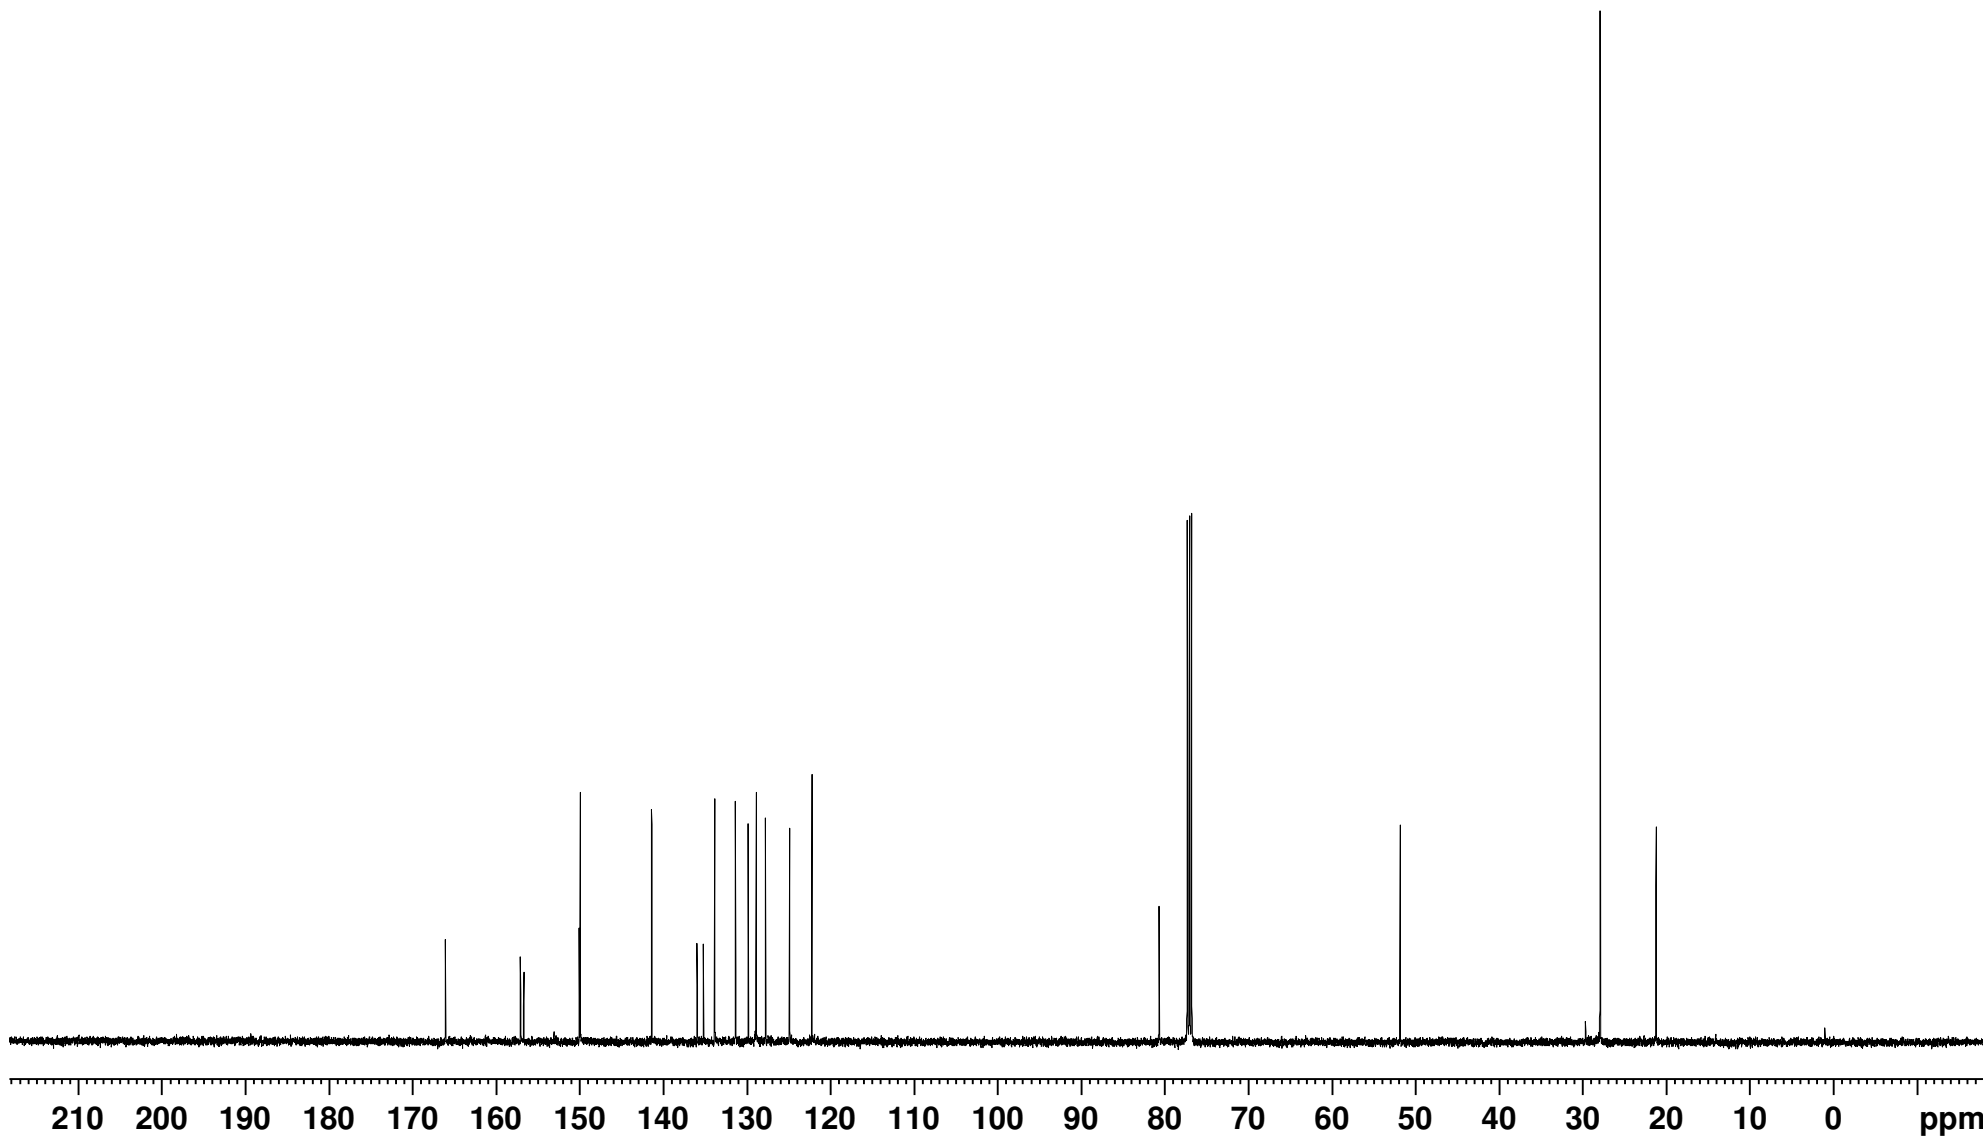



KS-9-149

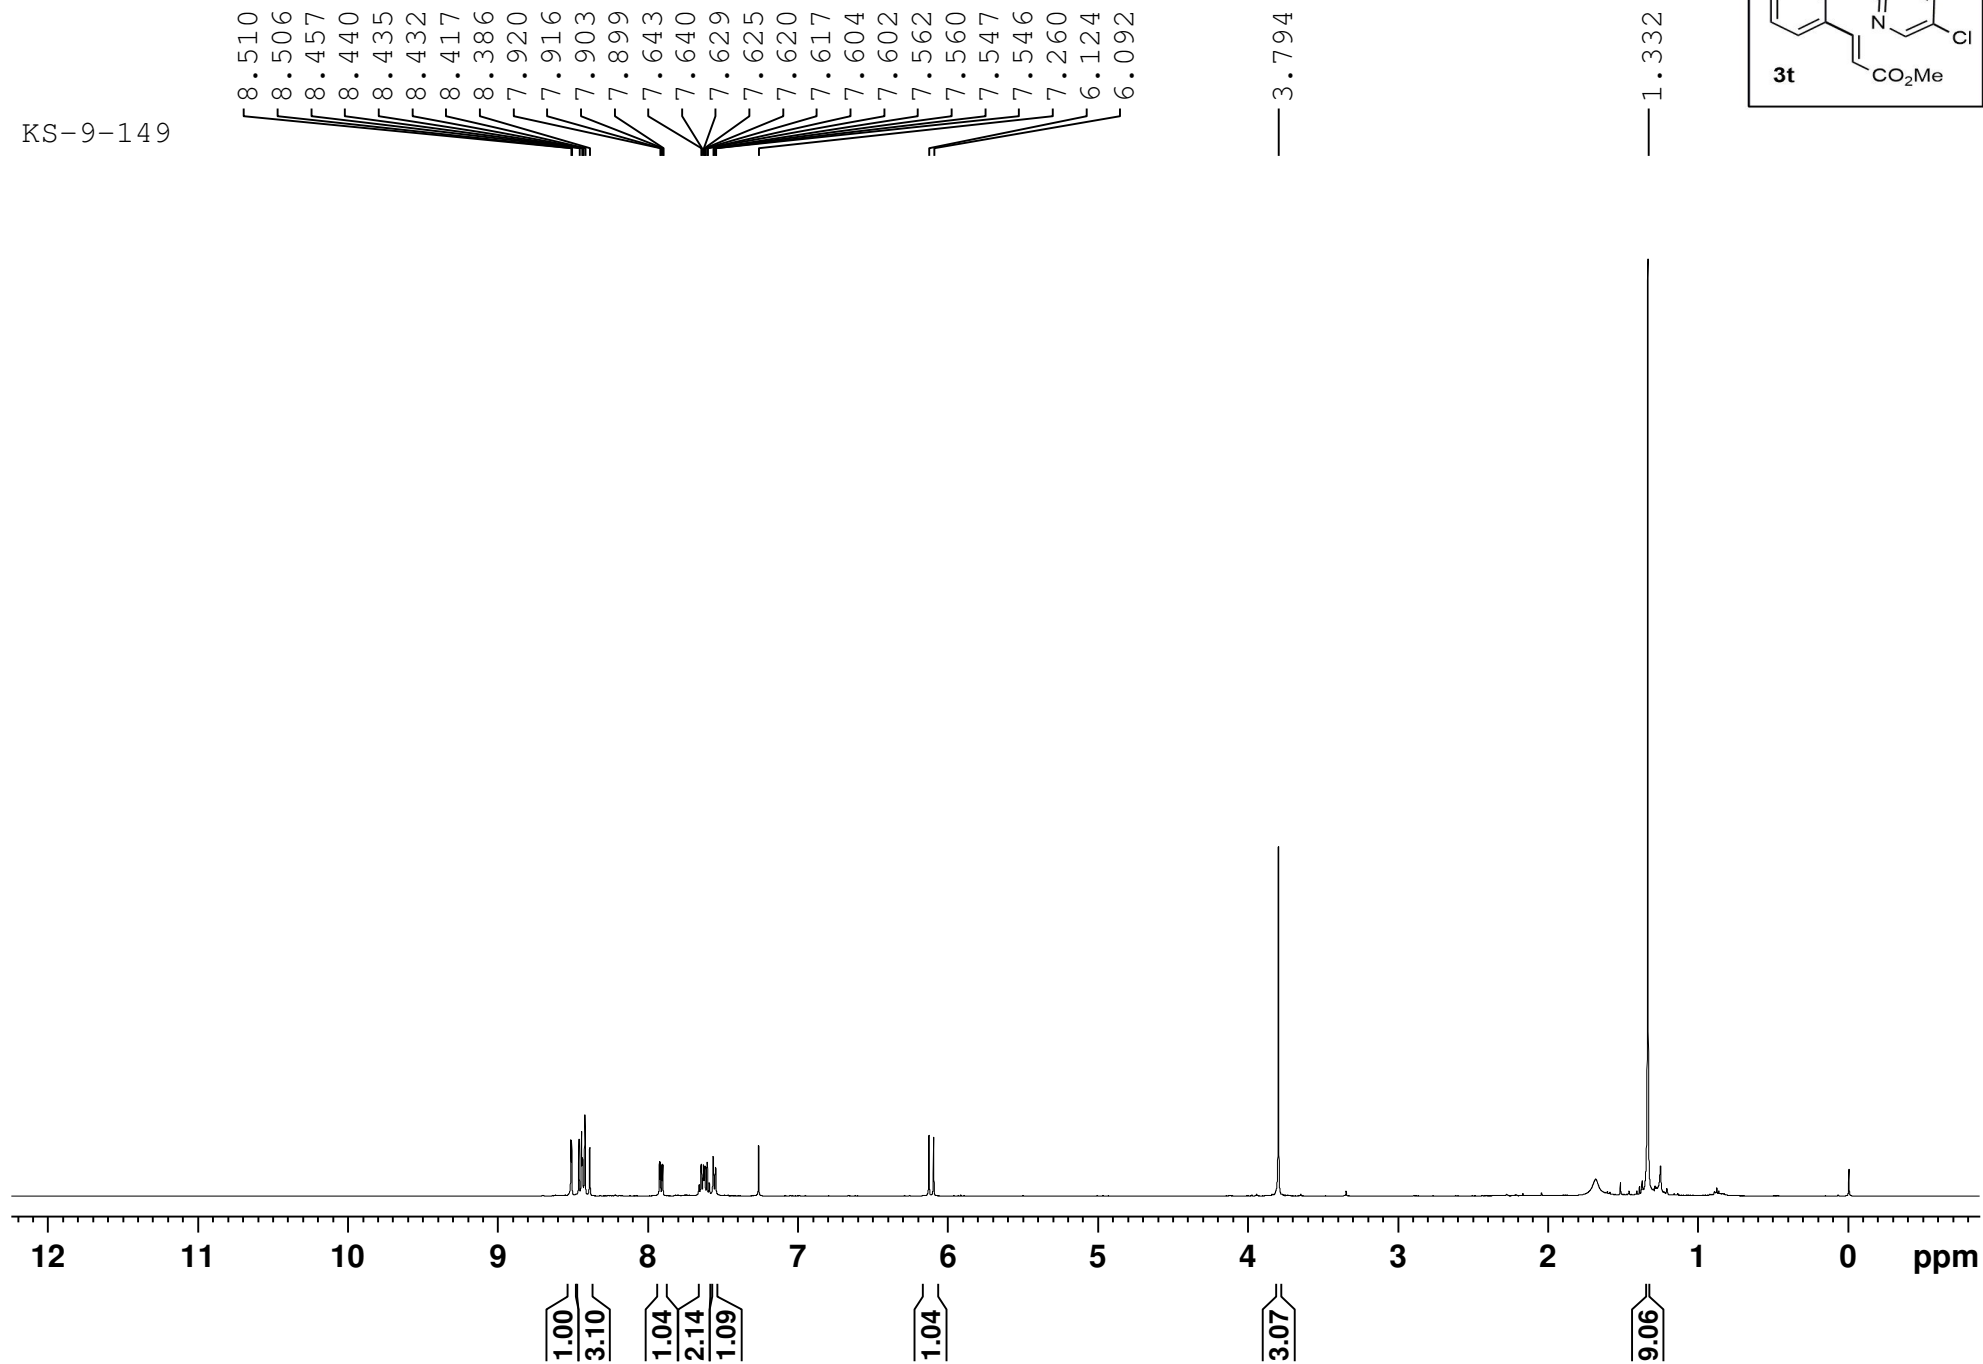

KS-9-149

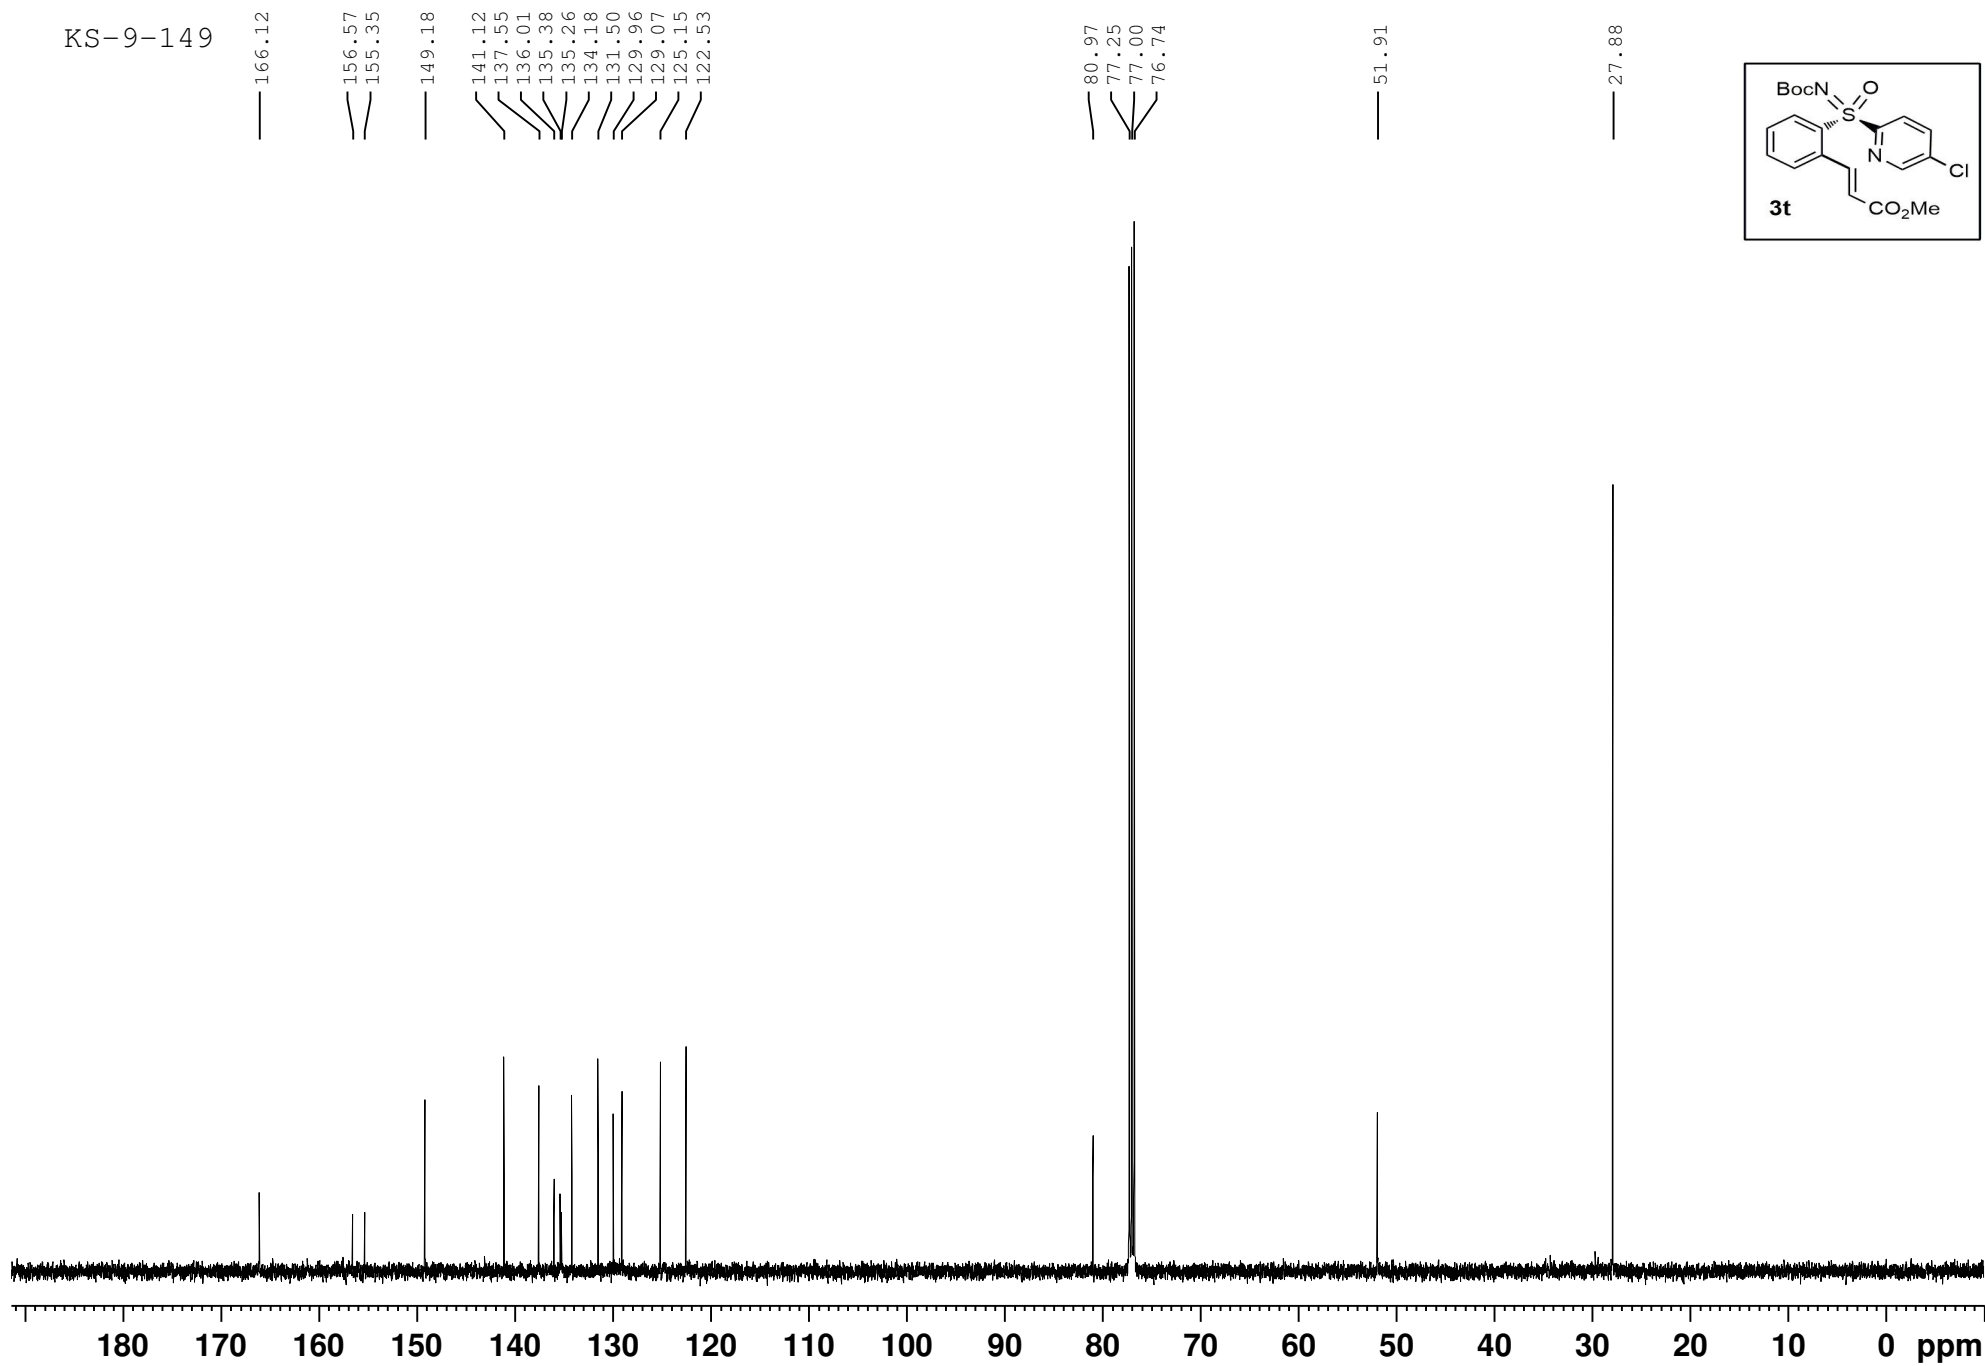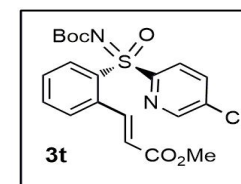

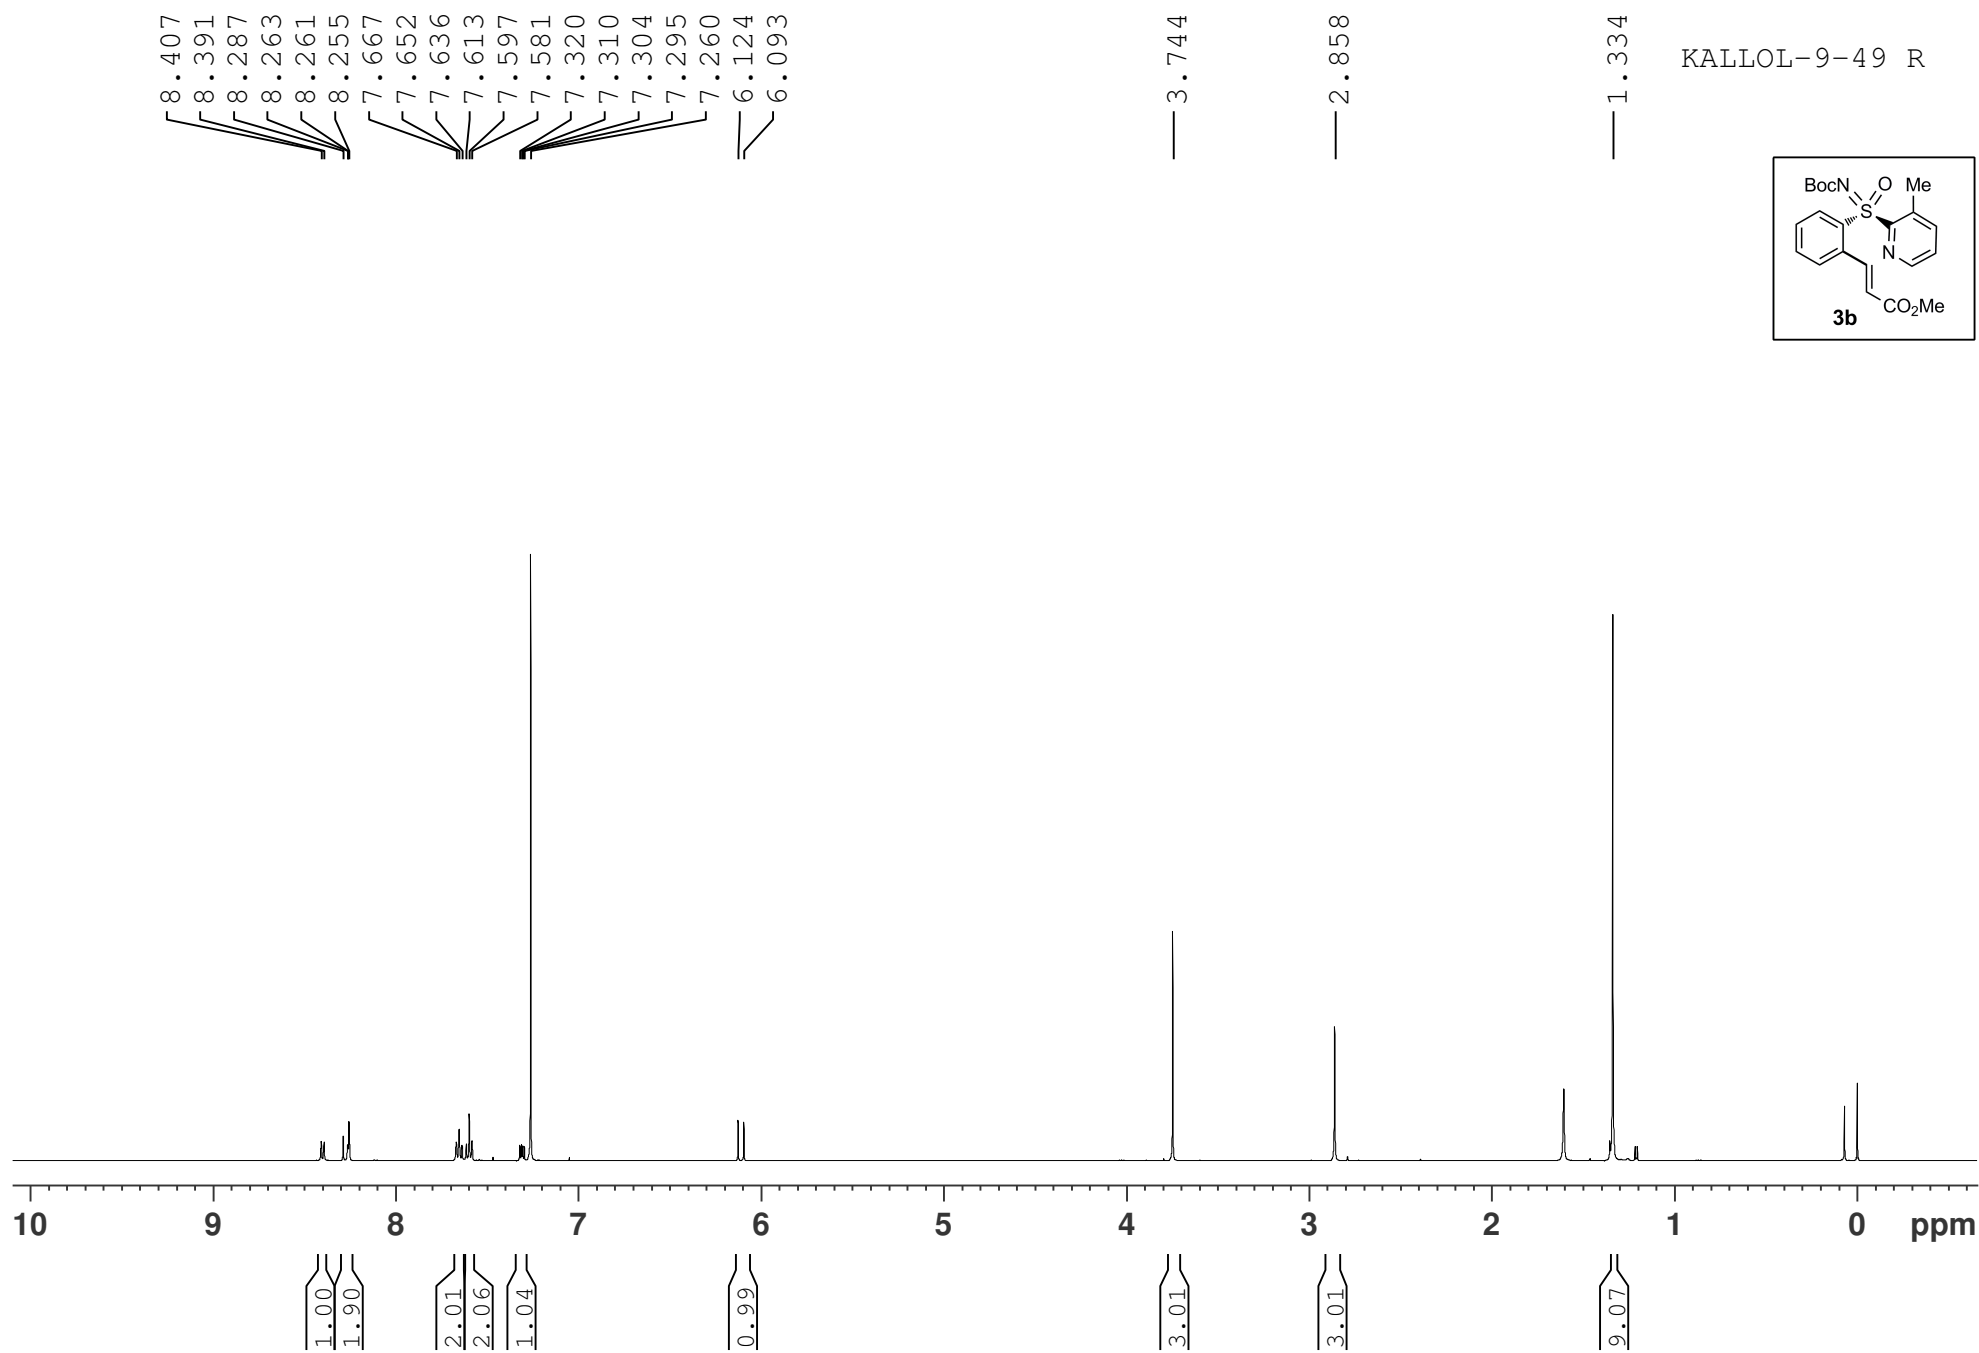

KALLOL-9-49 R

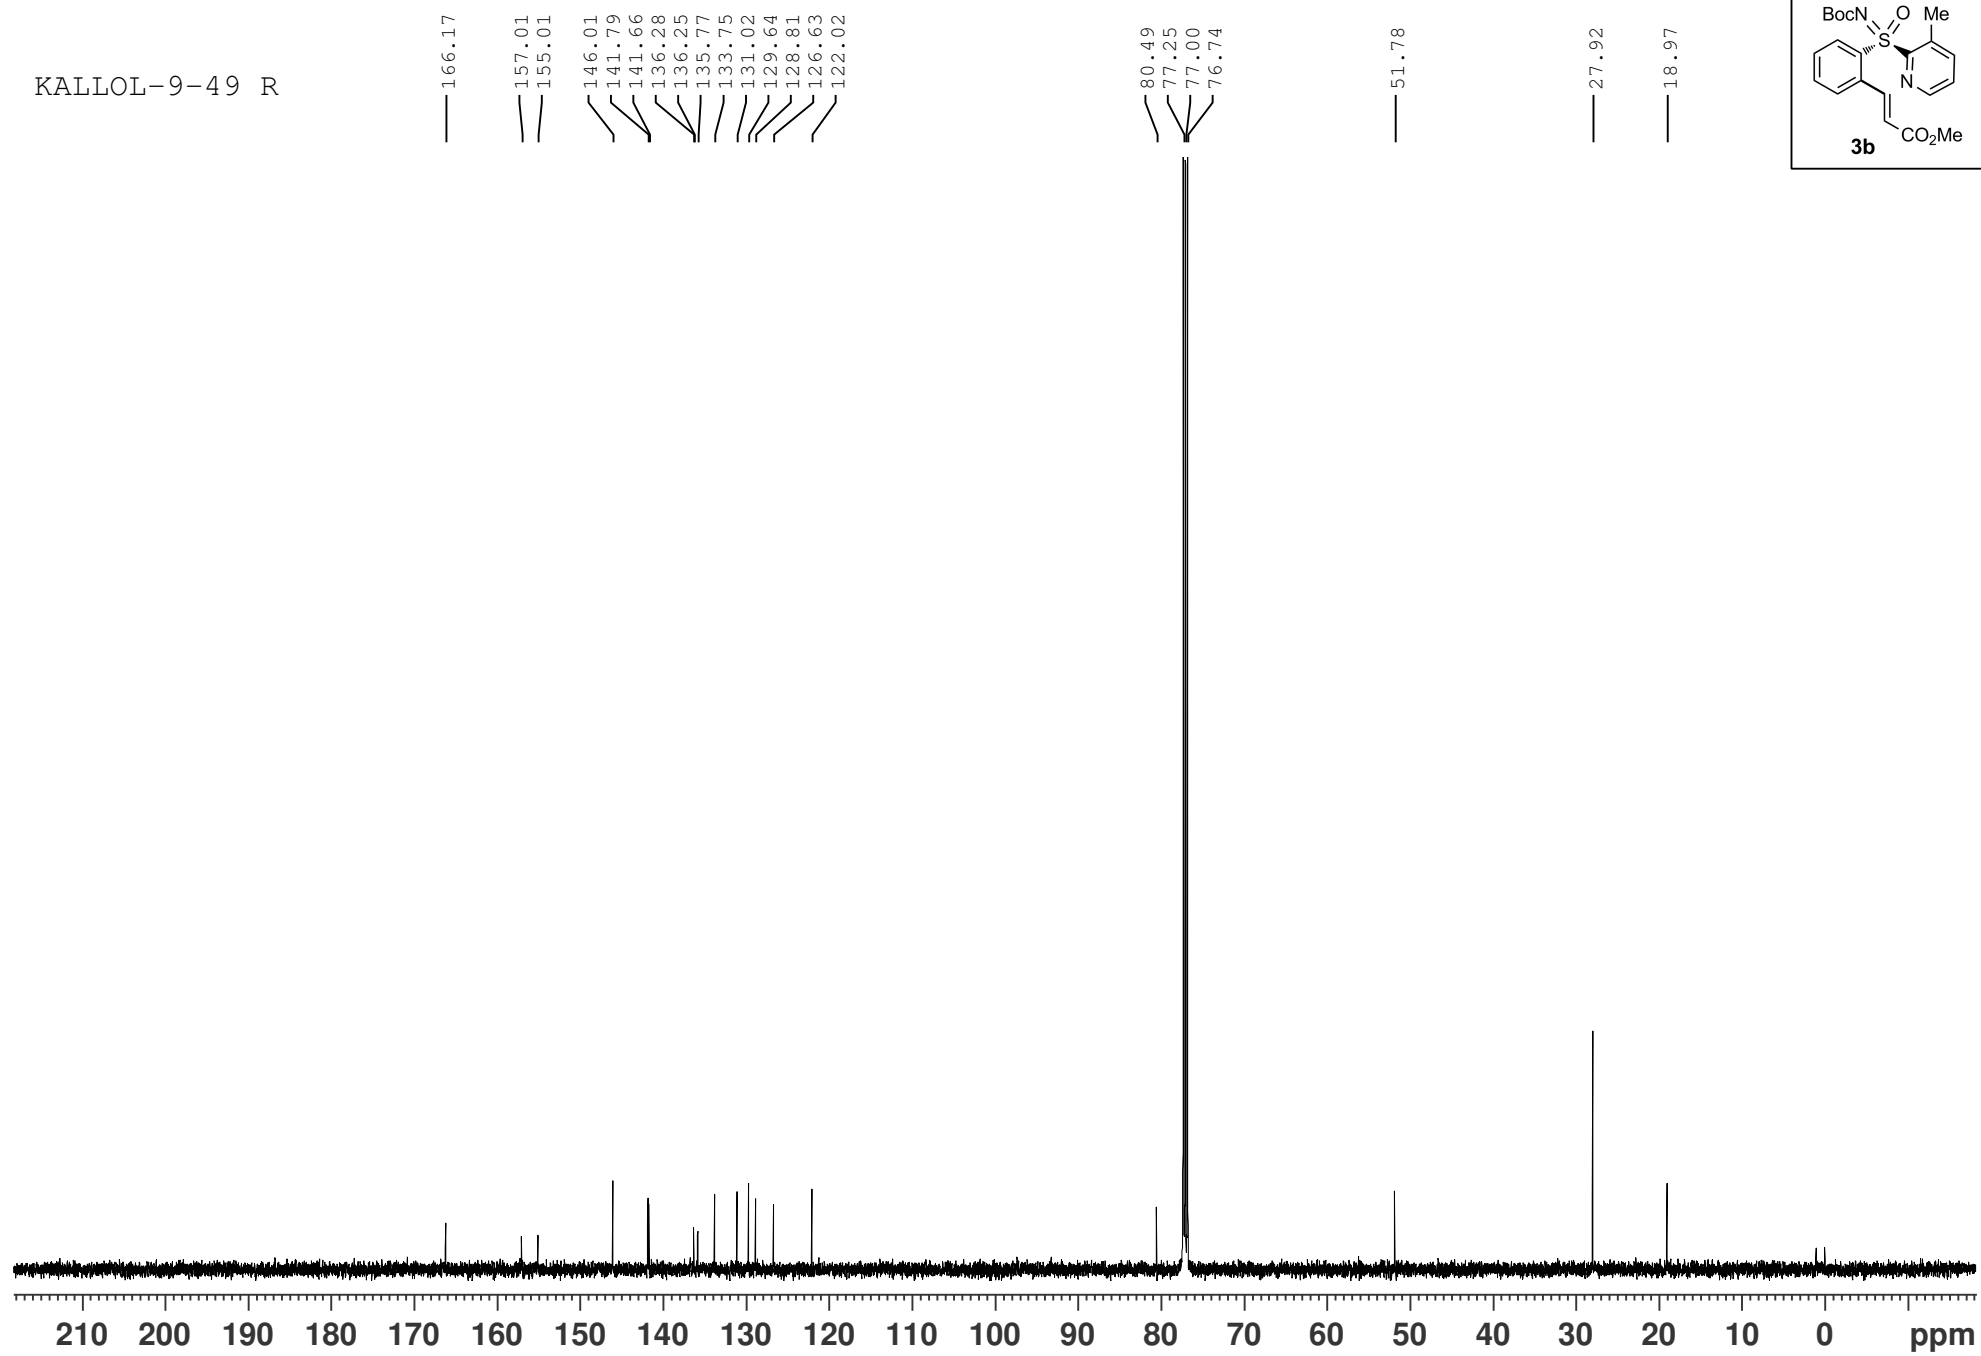

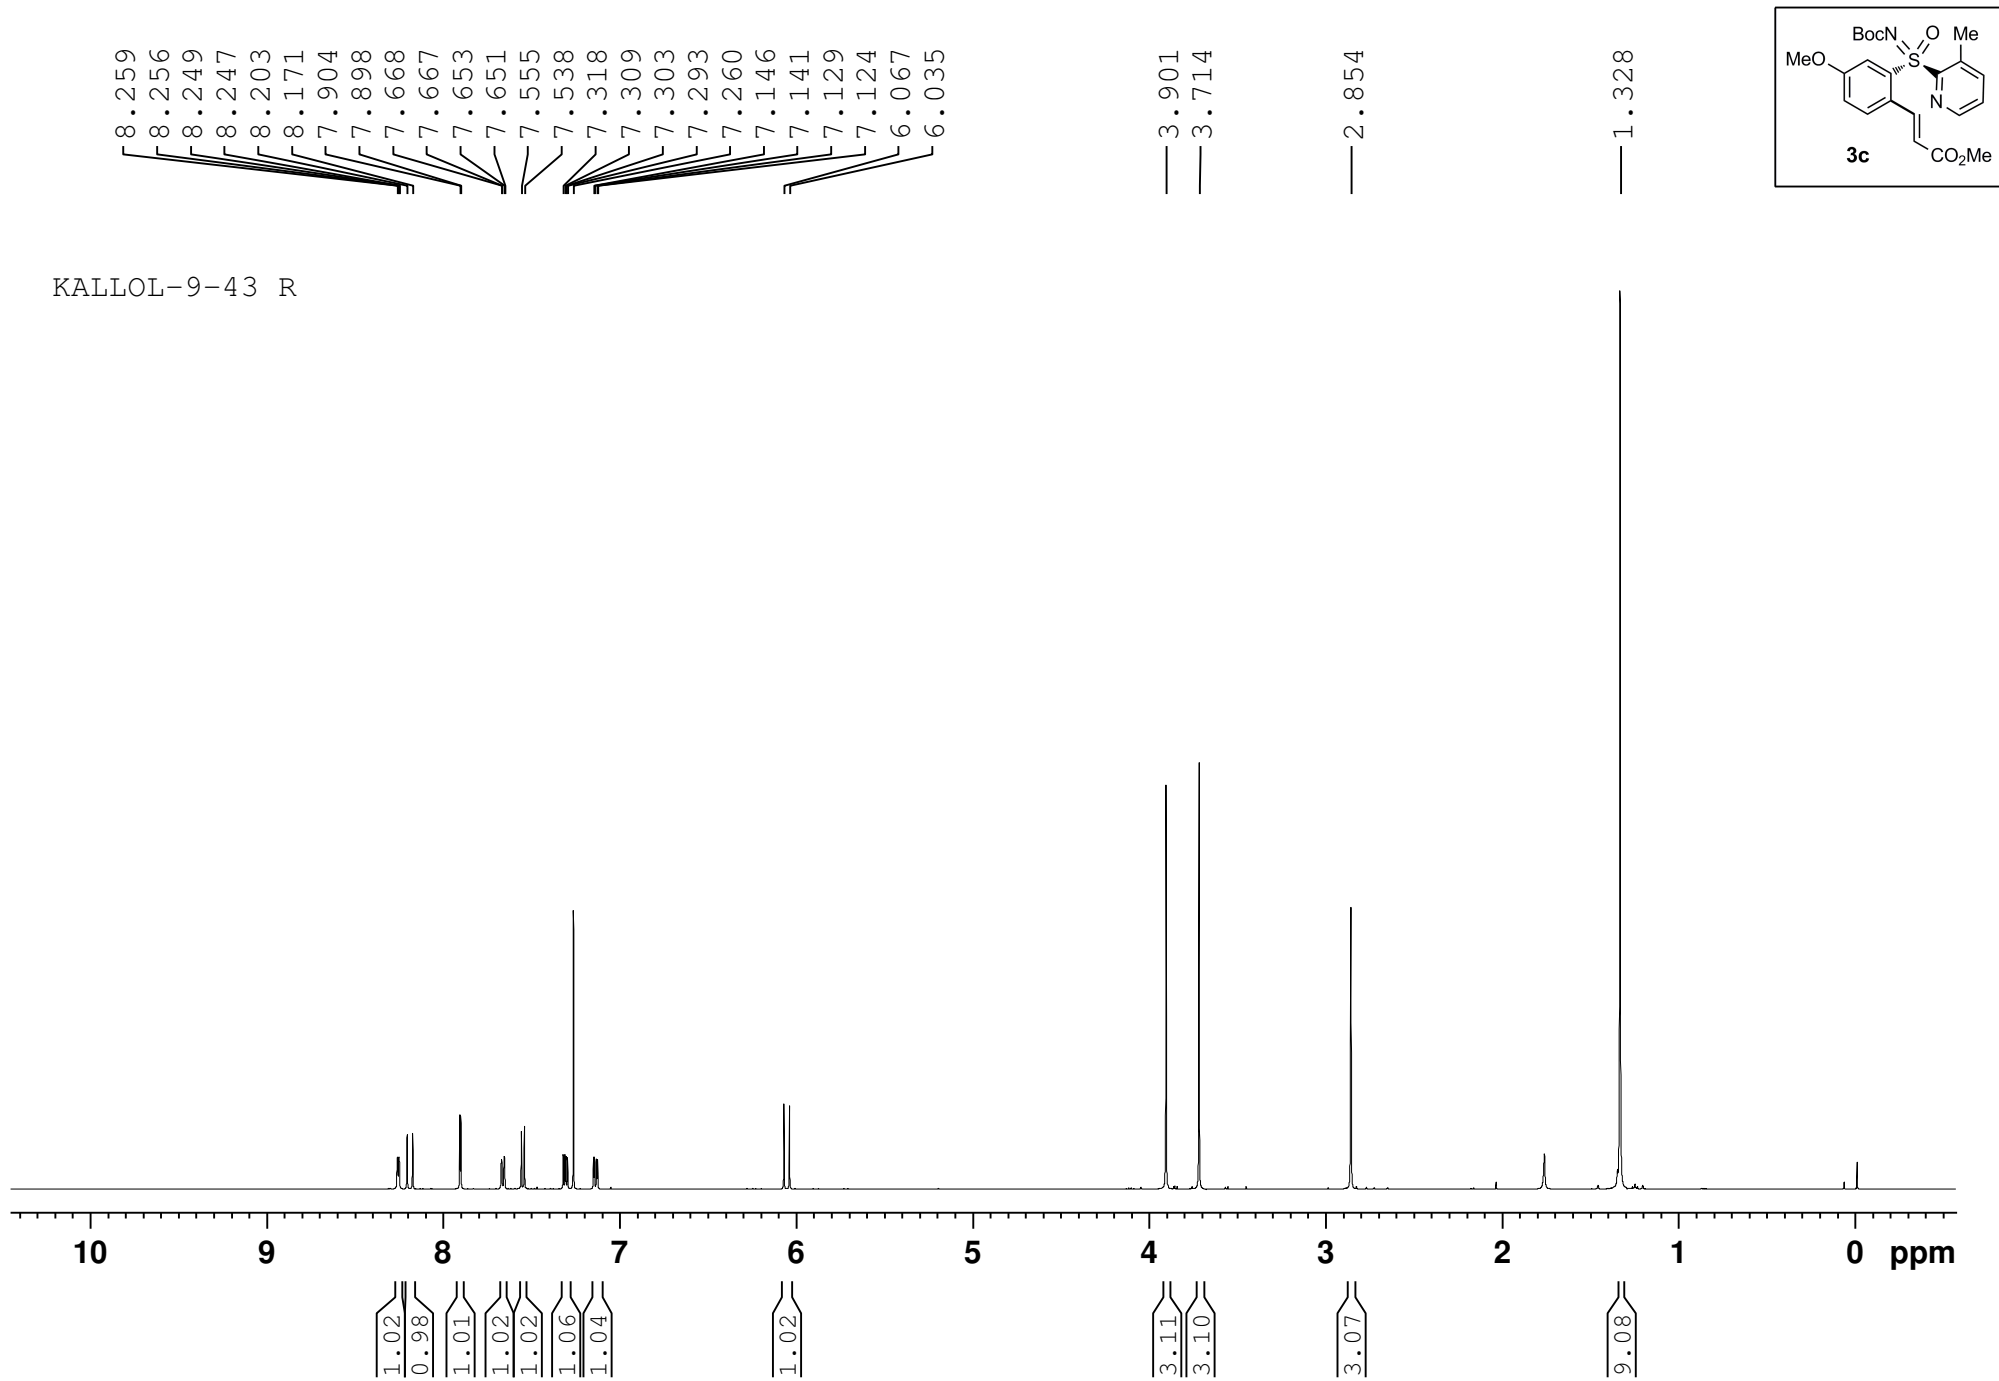

KALLOL-9-43 R

166.43  
160.50  
156.96  
154.91  
145.97  
141.67  
141.17  
137.50  
135.60  
130.00  
128.11  
126.65  
119.98  
119.88  
115.60

80.47  
77.25  
77.00  
76.74

55.84  
51.63

27.88

18.92

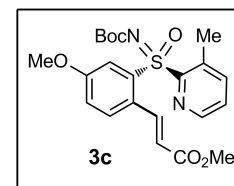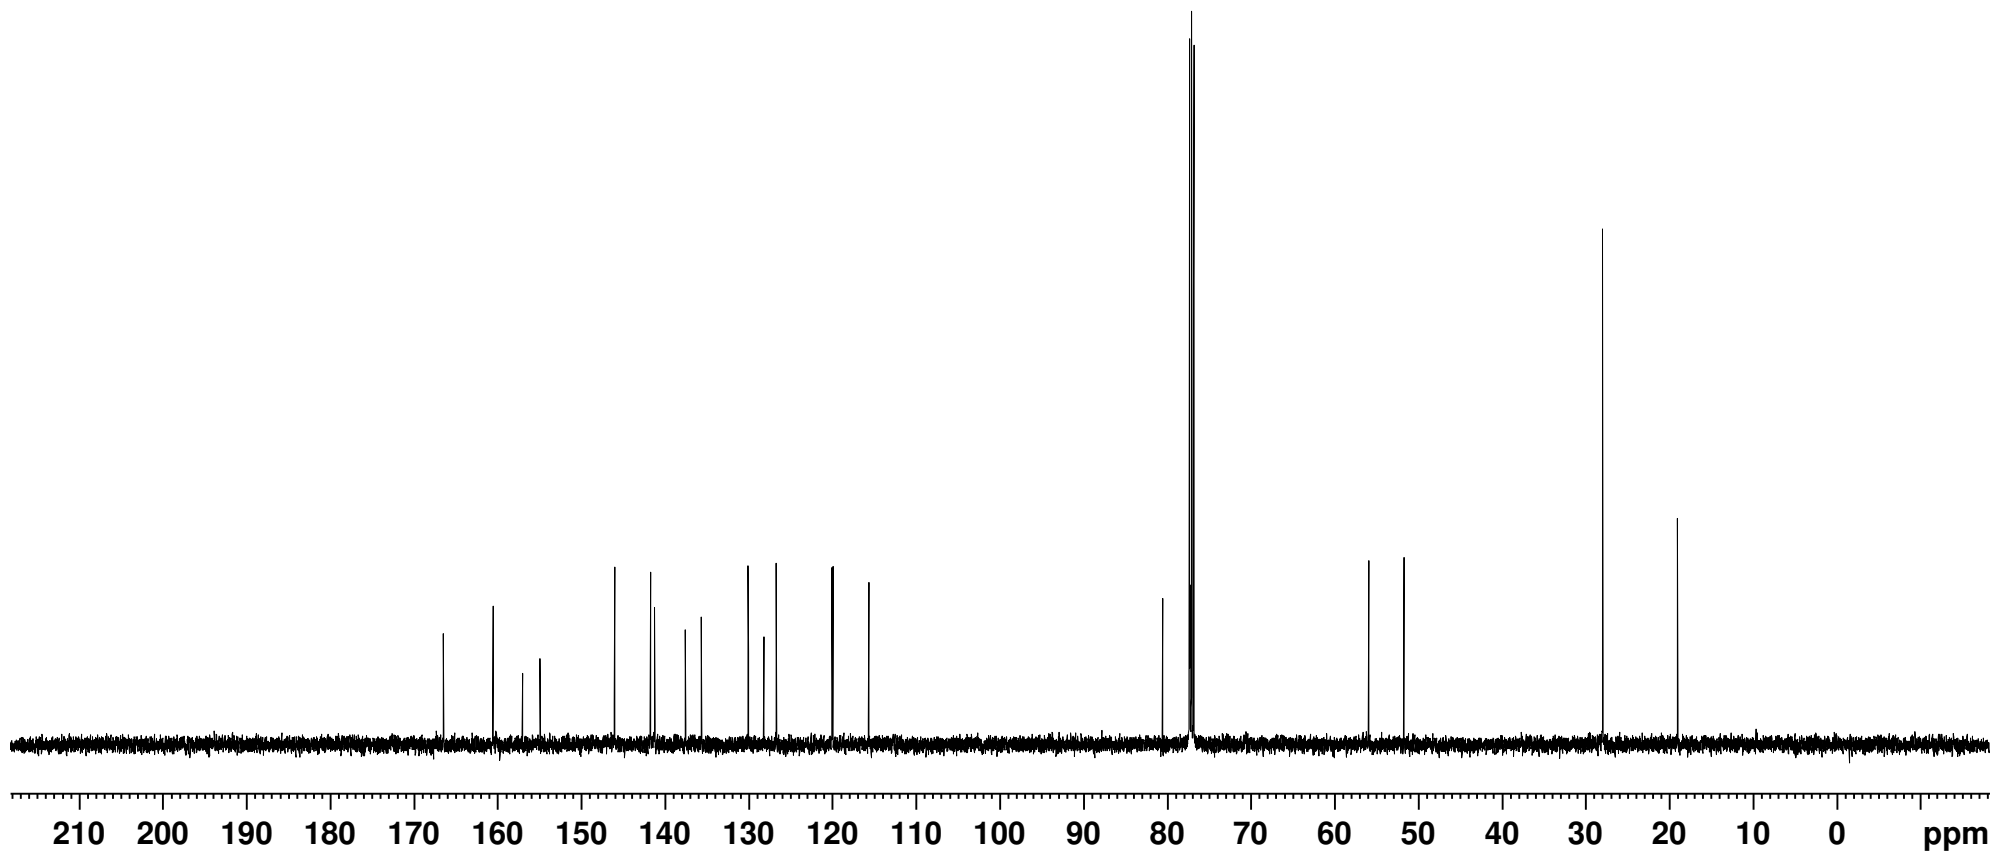

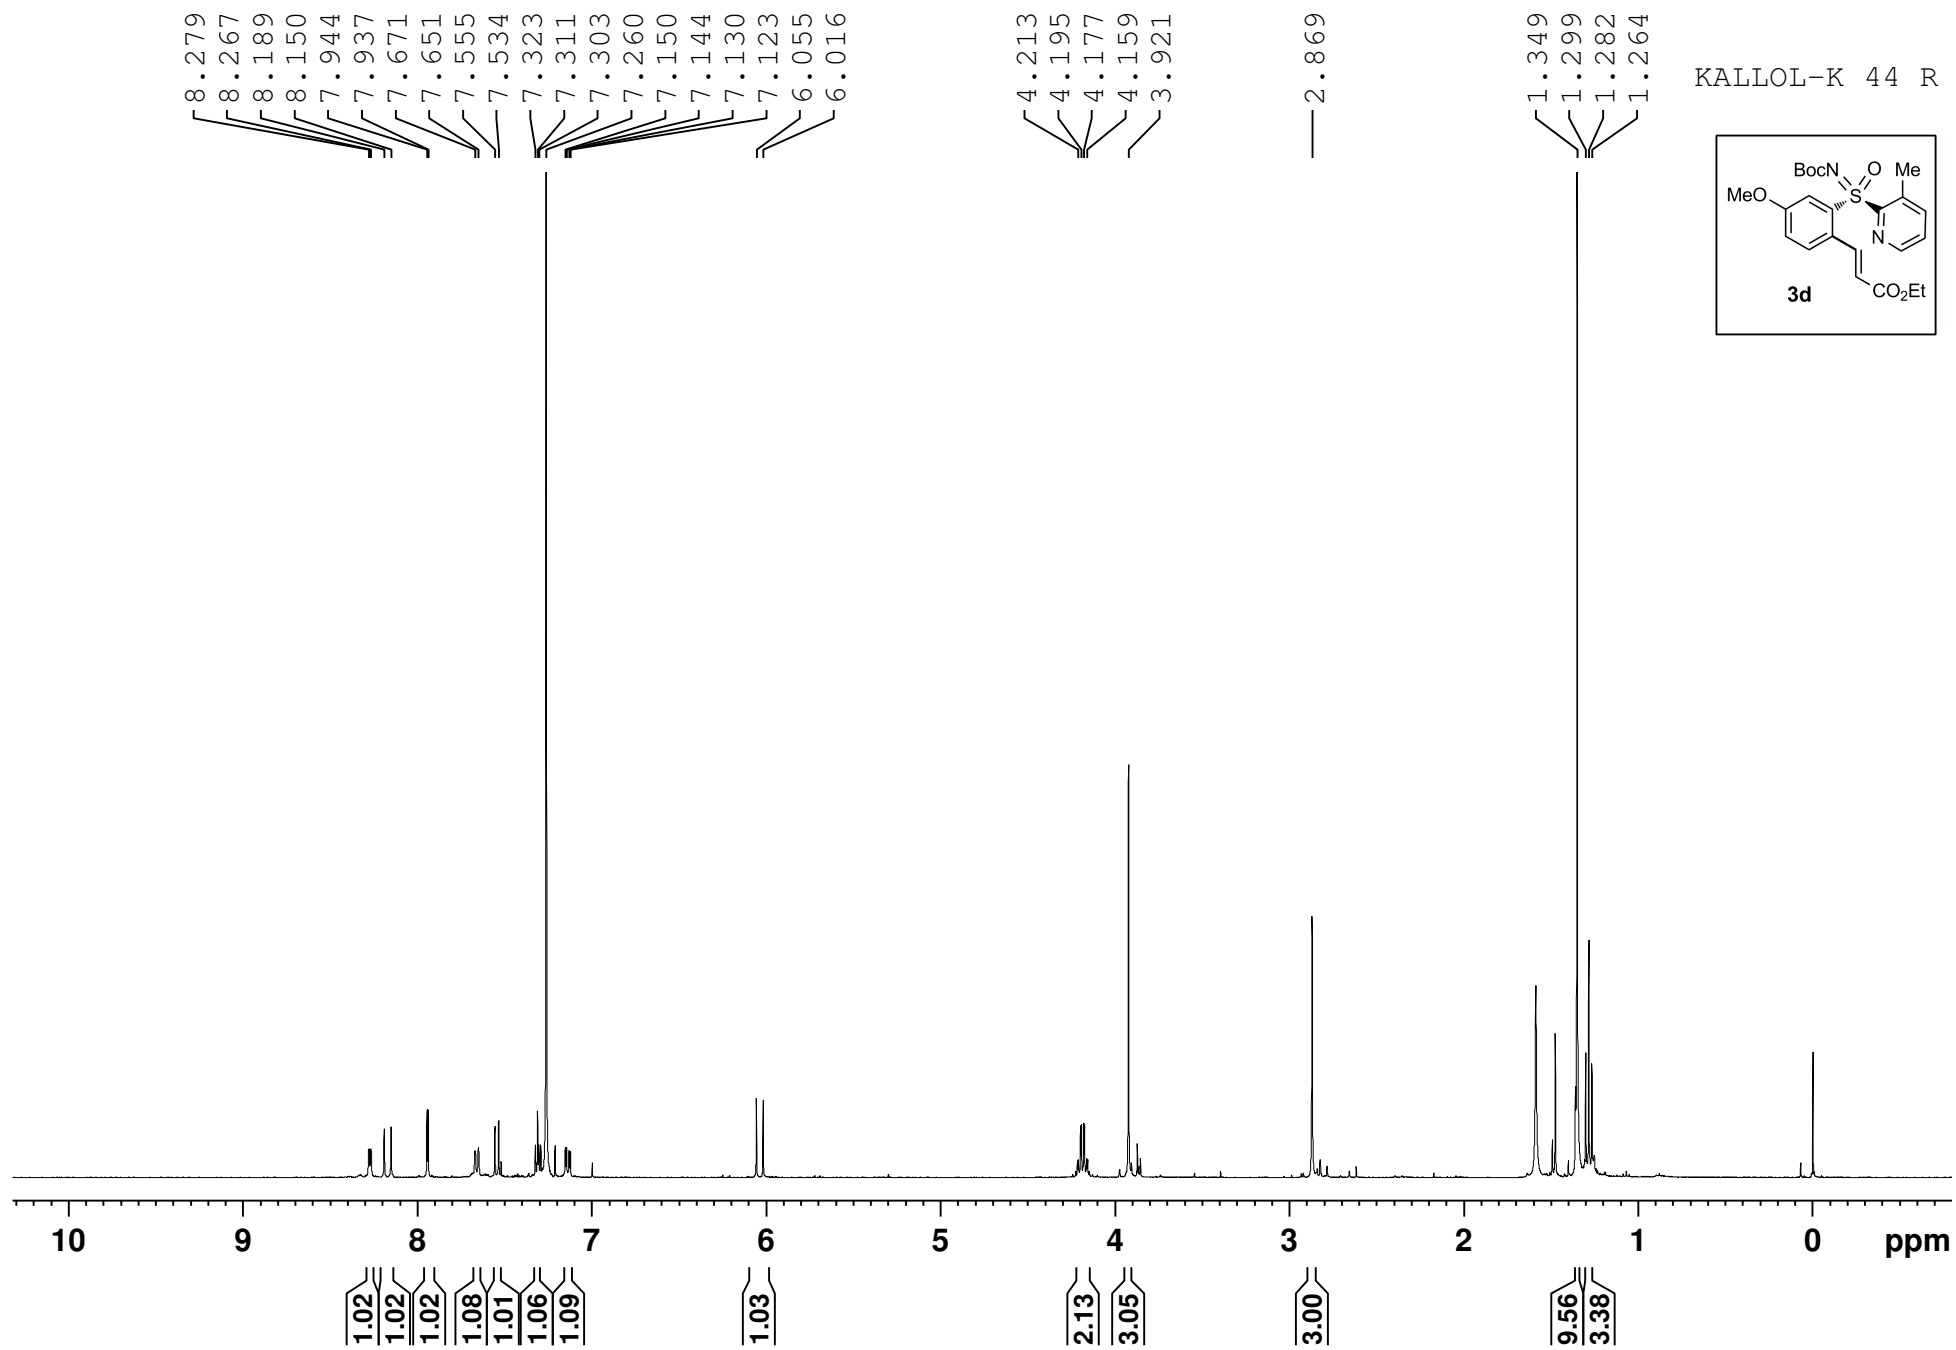

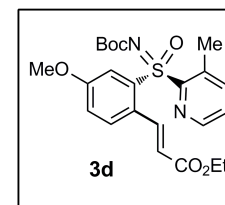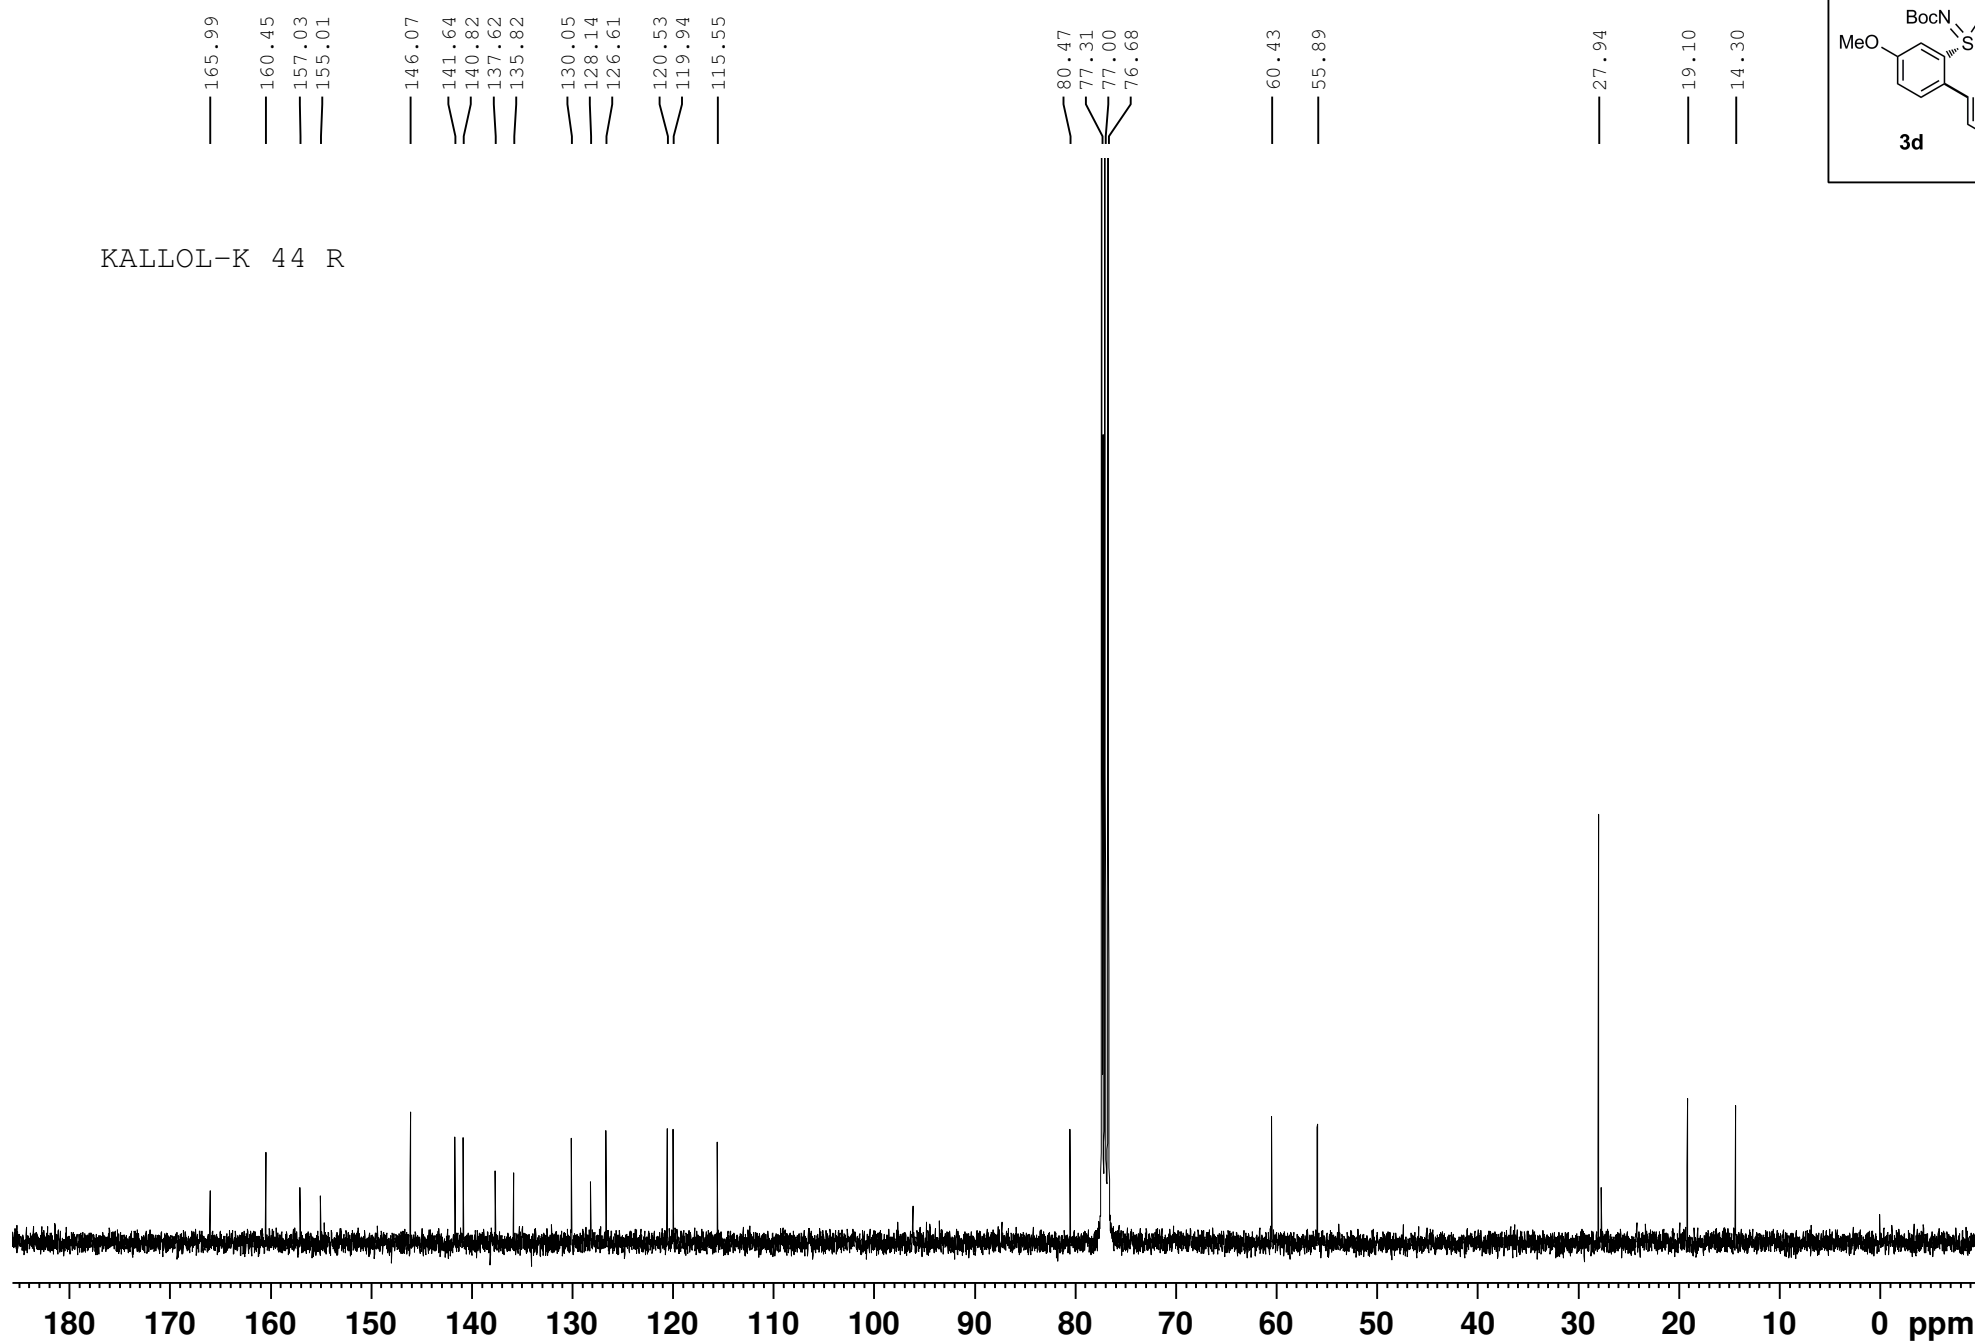



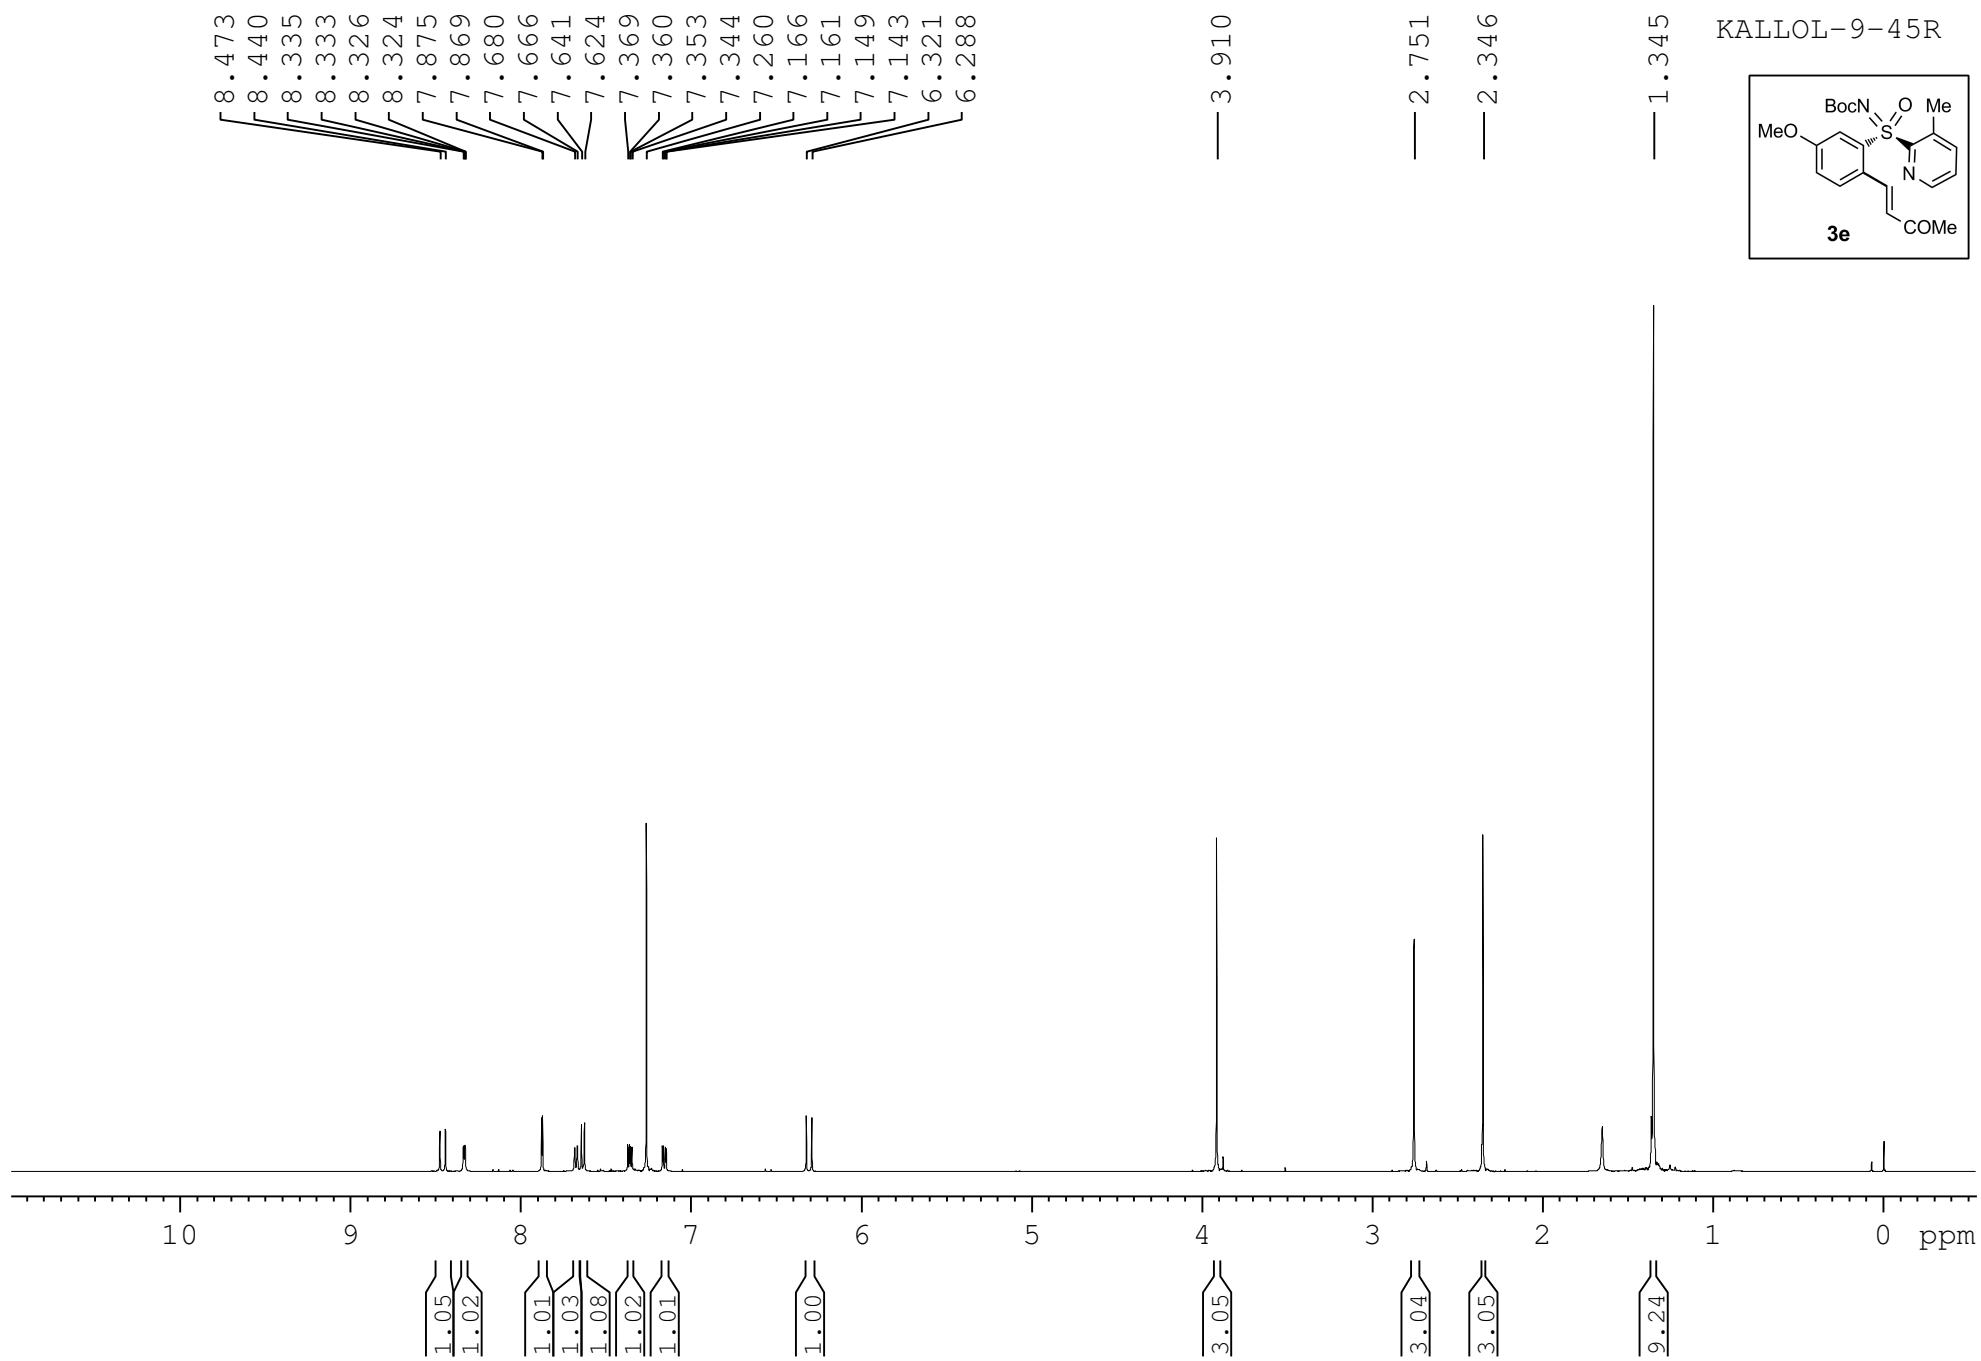

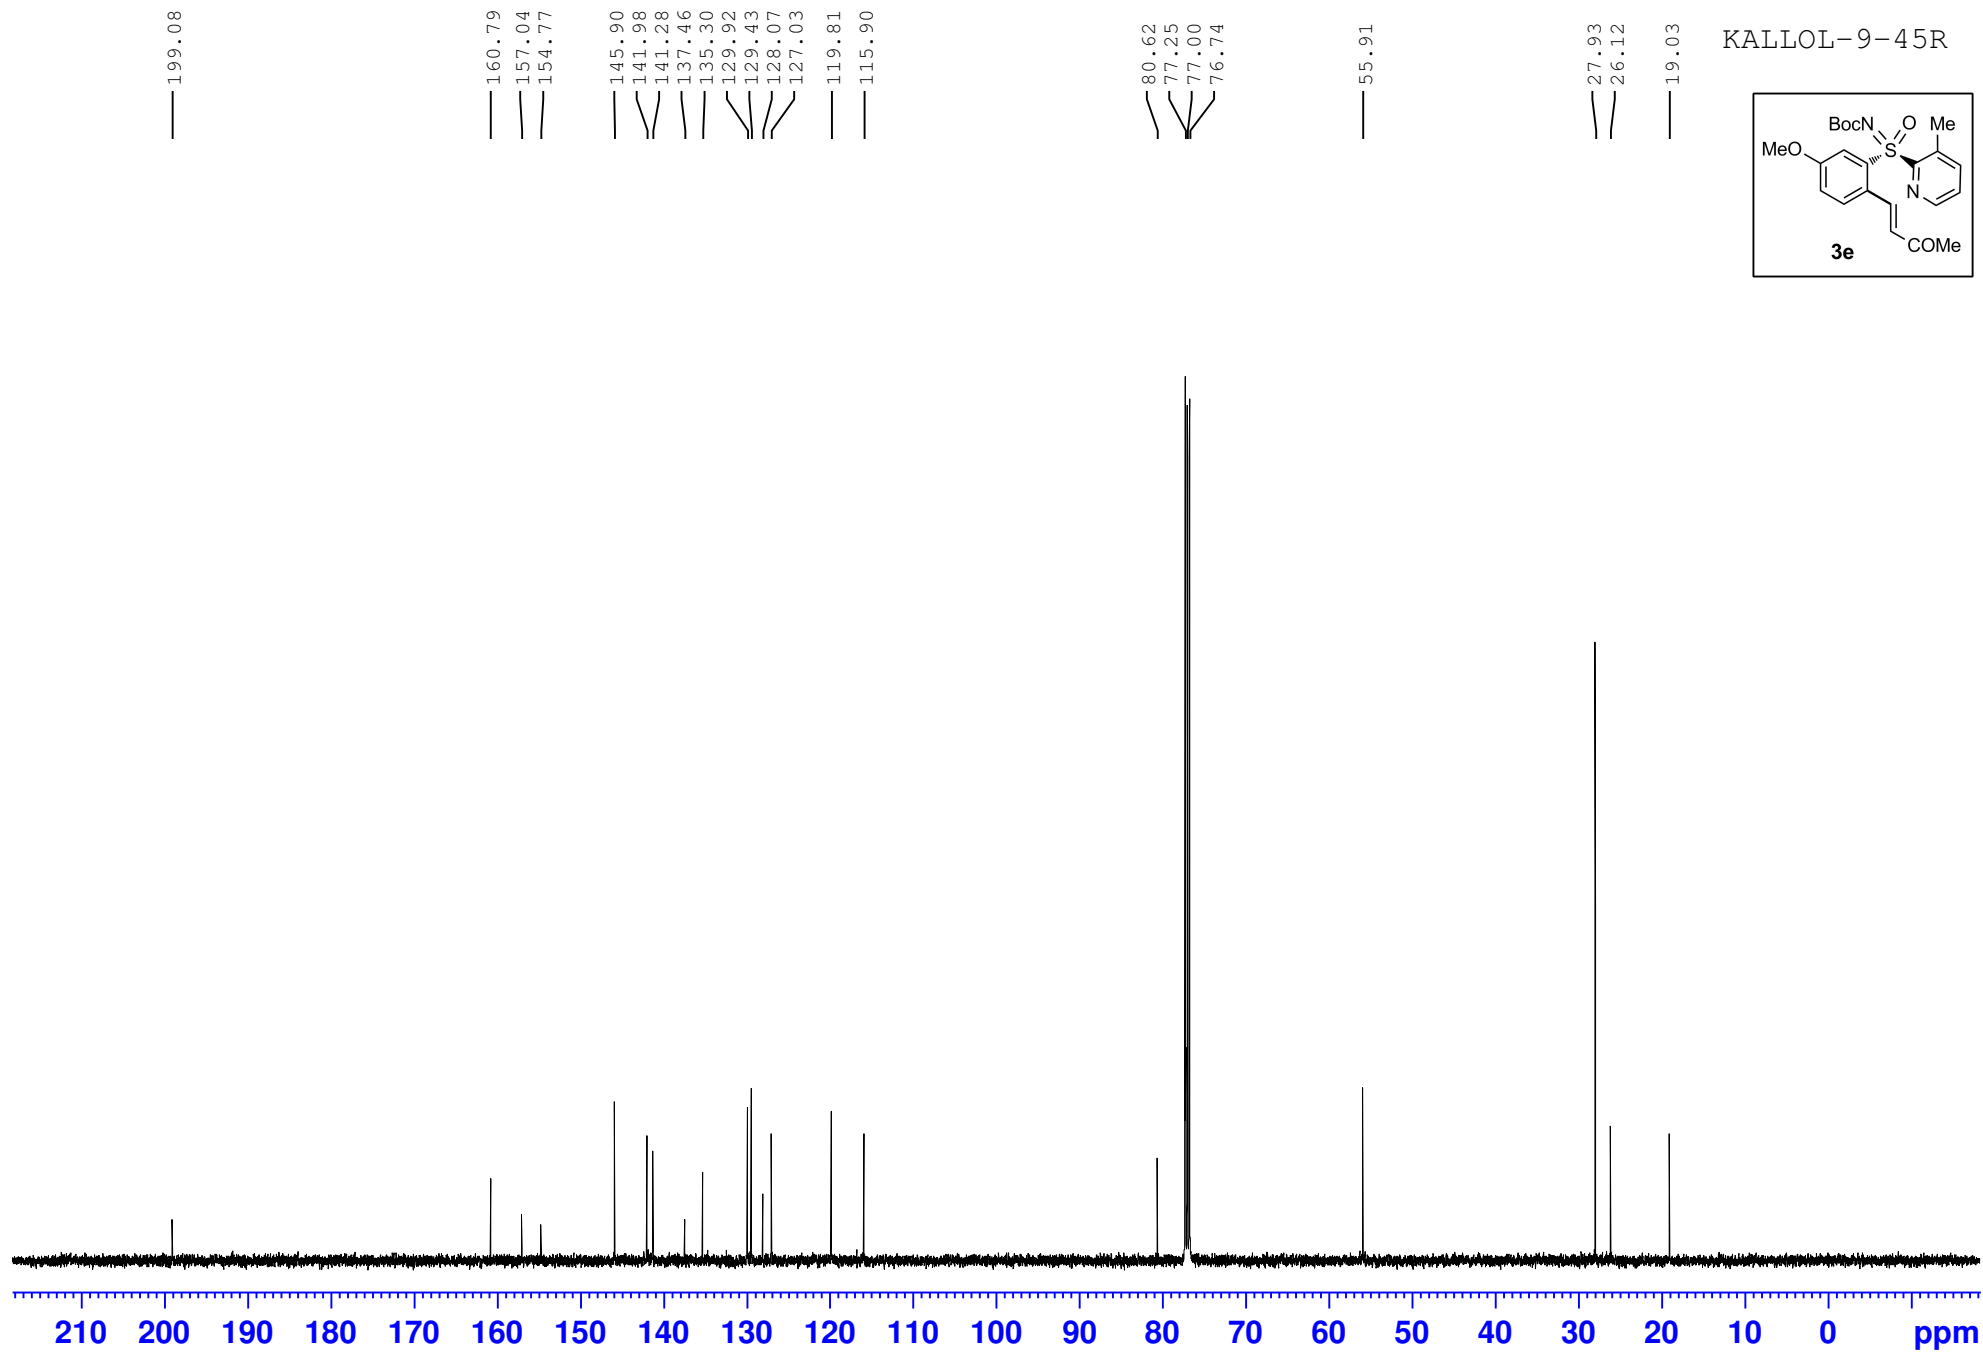

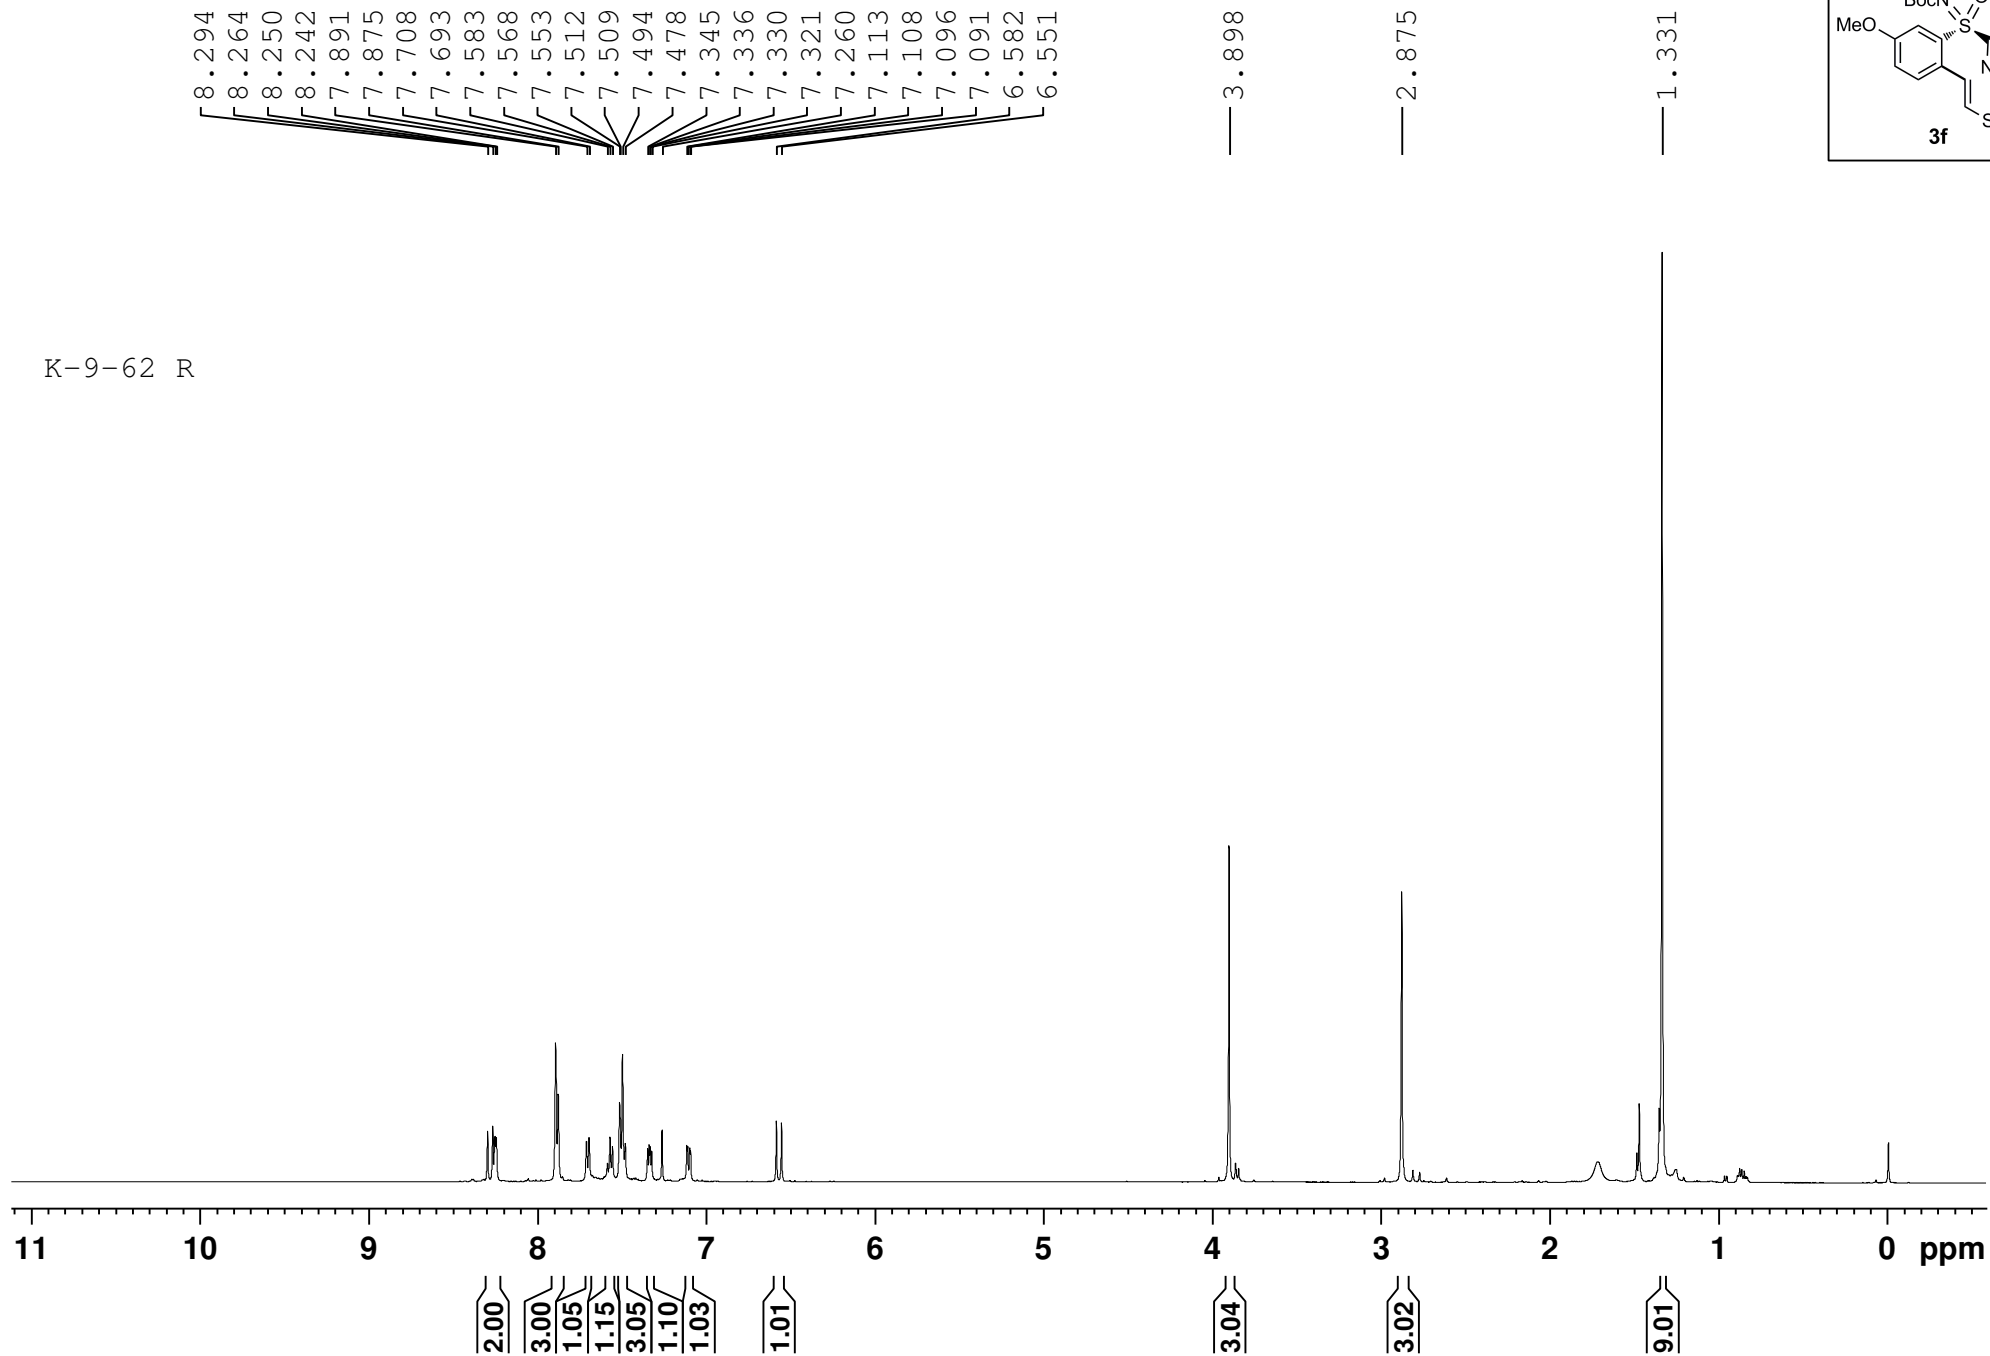

K-9-62 R

161.07  
156.73  
154.65  
146.13  
141.97  
140.22  
139.33  
138.37  
135.75  
133.24  
130.31  
129.19  
128.63  
127.87  
126.82  
125.62  
119.56  
116.13

80.69  
77.25  
77.00  
76.74

55.94

27.87

19.06

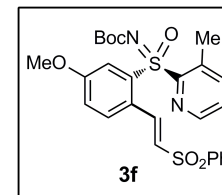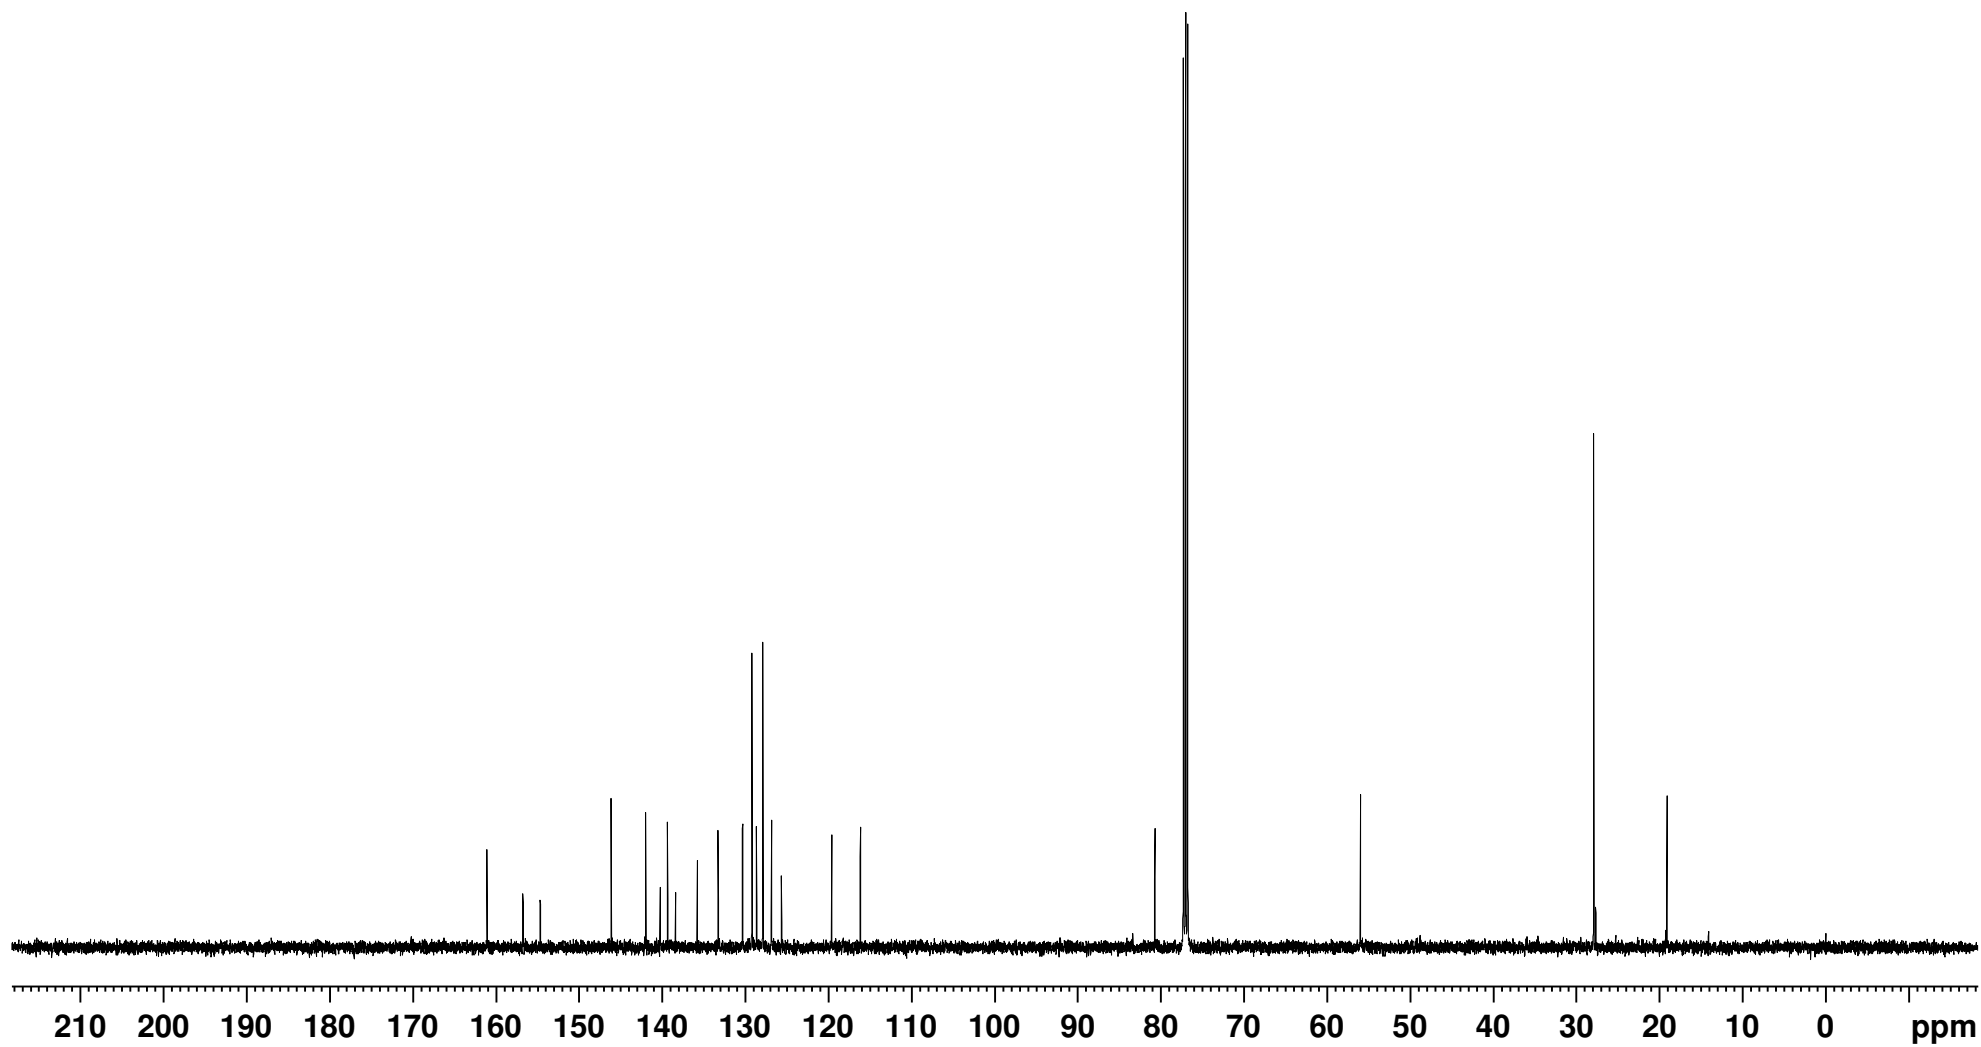

8.293  
 8.290  
 8.283  
 8.281  
 7.940  
 7.905  
 7.896  
 7.875  
 7.870  
 7.861  
 7.681  
 7.666  
 7.575  
 7.558  
 7.335  
 7.326  
 7.320  
 7.310  
 7.260  
 7.148  
 7.142  
 7.130  
 7.126  
 5.992  
 5.957  
 5.955  
 5.920  
 4.077  
 4.068  
 4.063  
 4.054  
 4.048  
 4.039  
 4.033  
 4.025  
 4.019  
 4.017  
 4.003  
 3.905  
 2.829  
 1.331  
 1.293  
 1.279  
 1.271  
 1.265  
 1.257  
 1.243

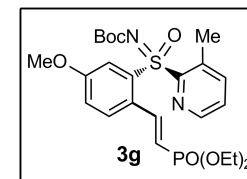

MAJJI-17-314

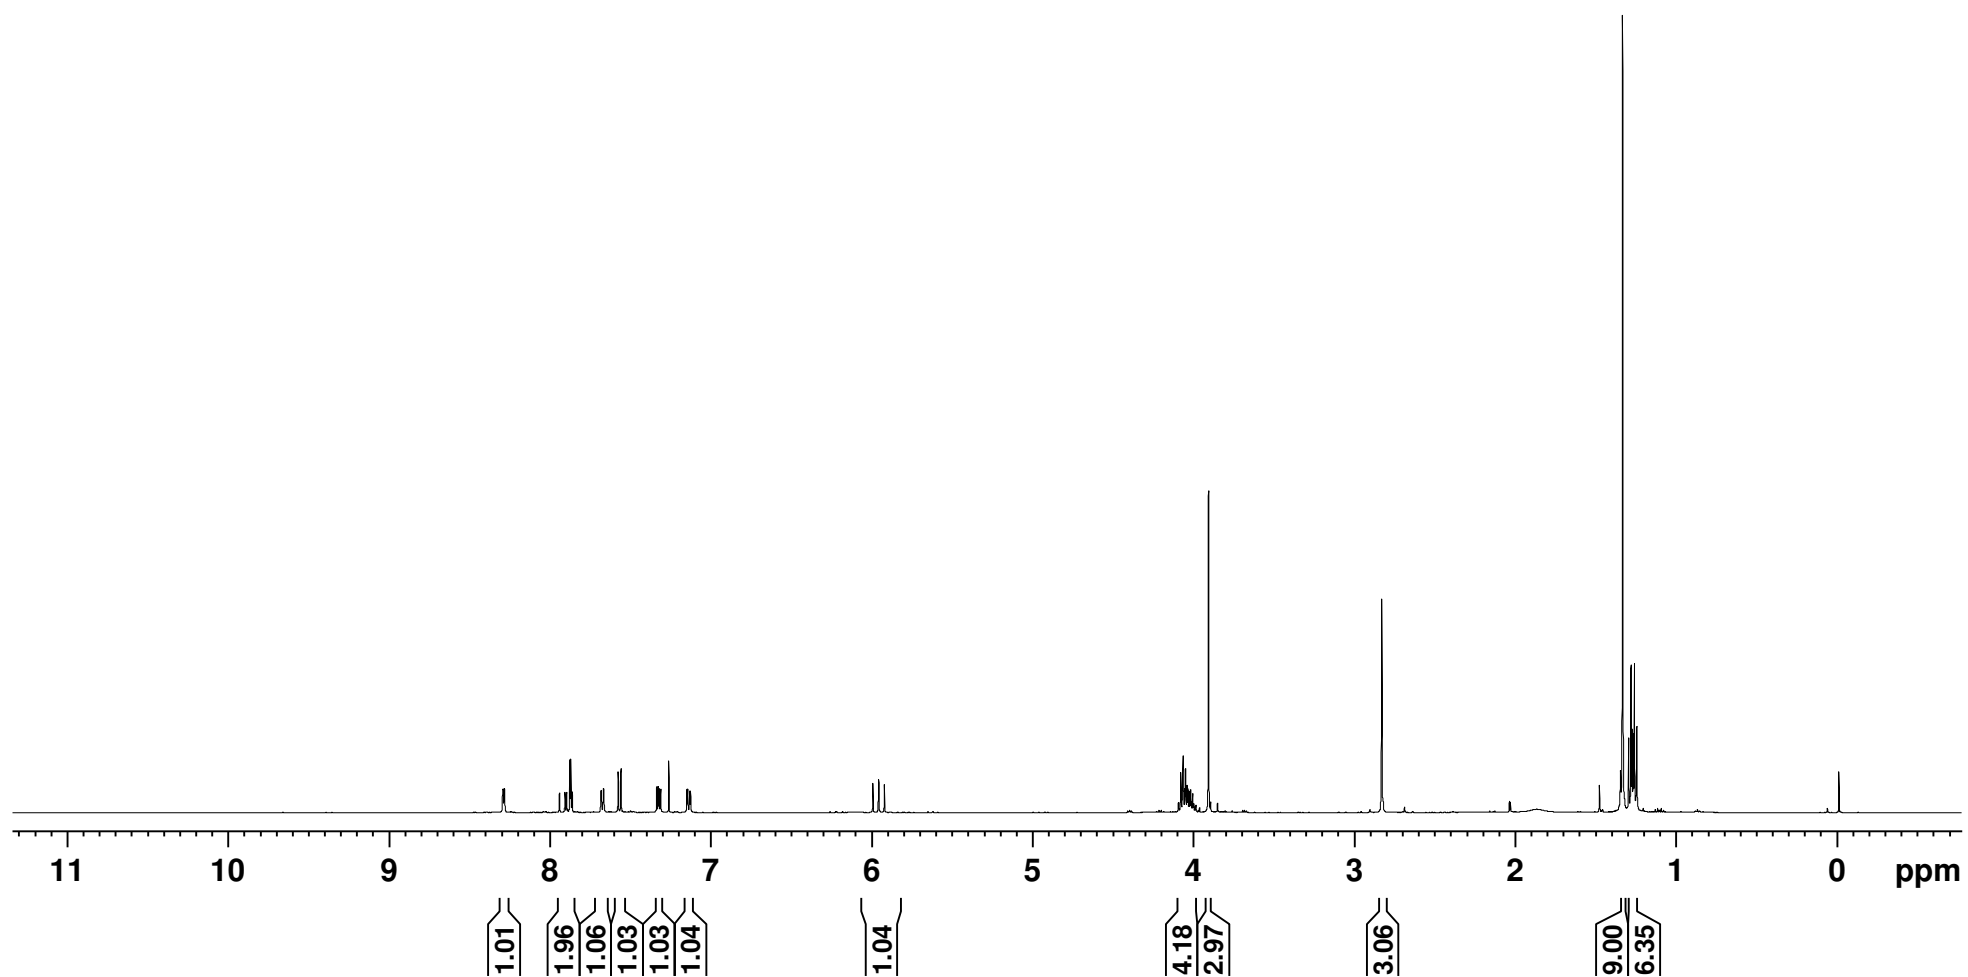

MJ-17-314

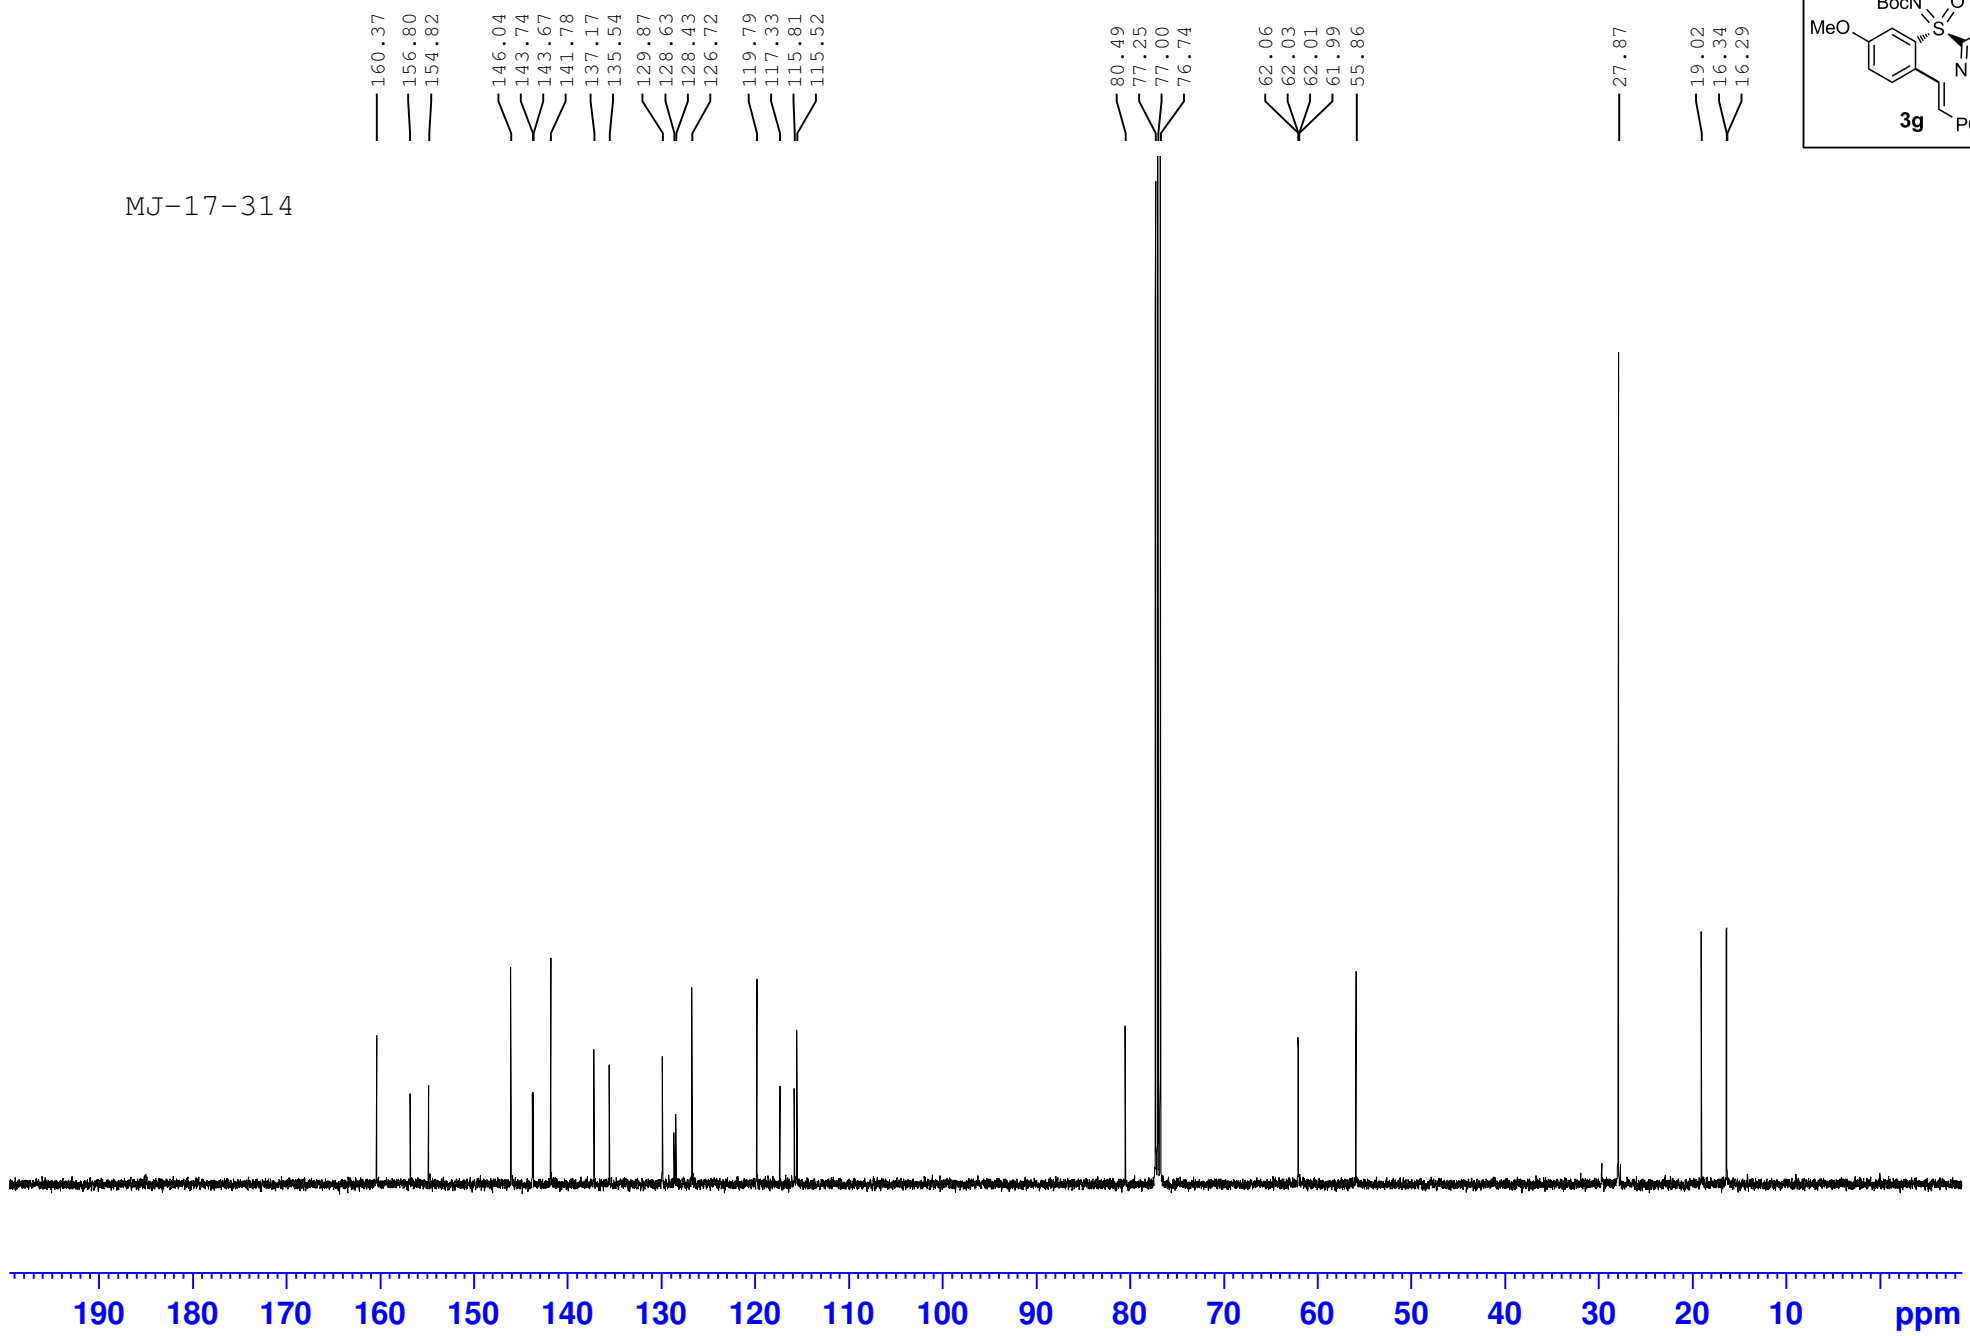

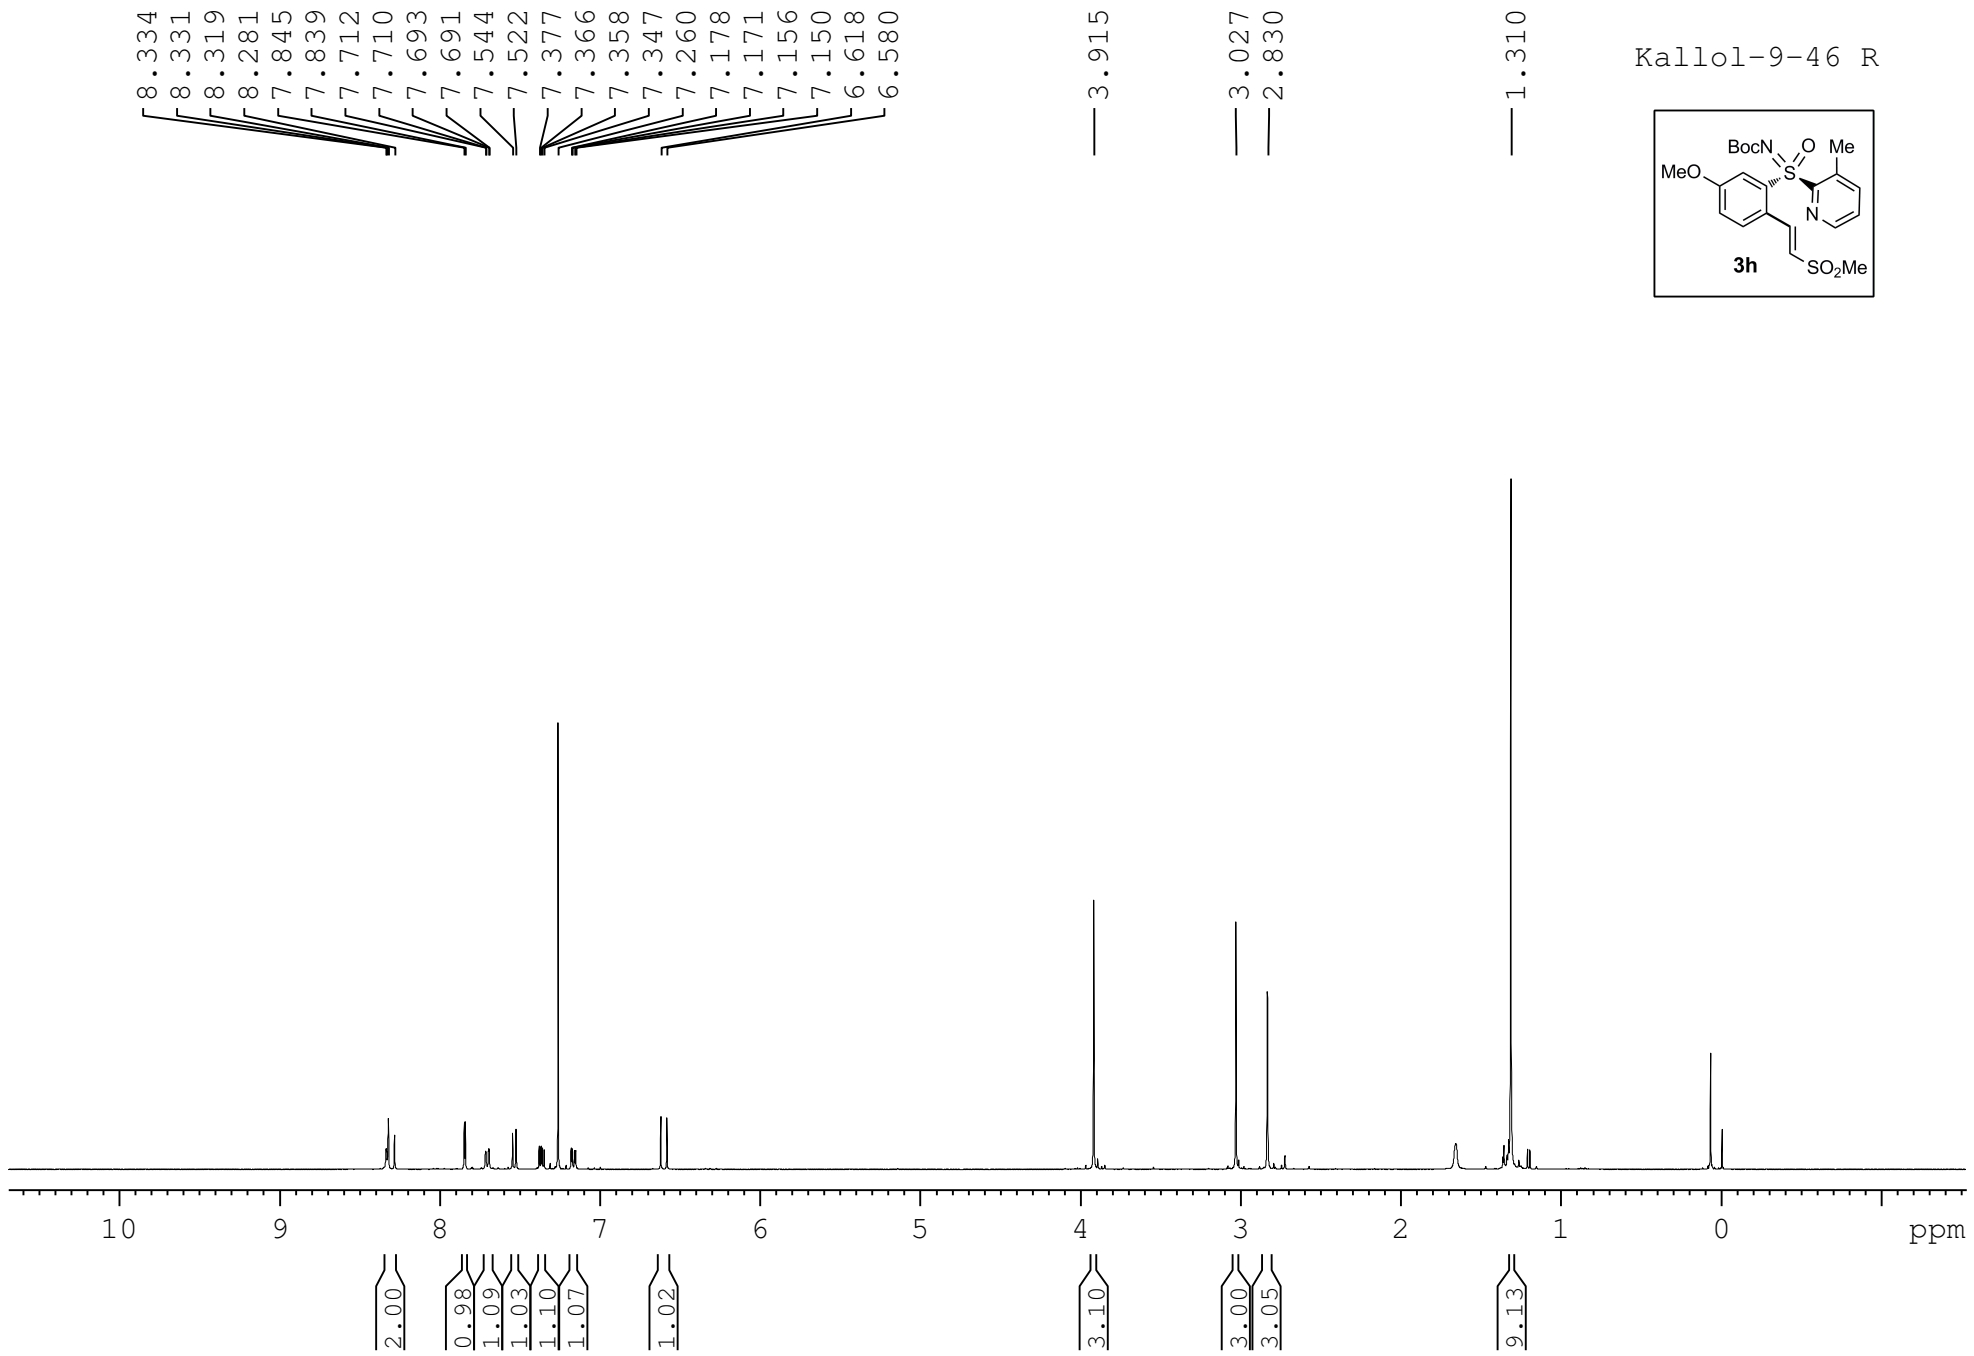

Kallol-9-46 R

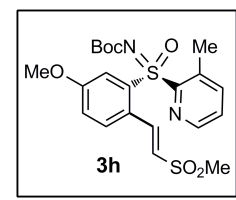

Kallol-9-46 R

161.18  
156.49  
154.58  
146.23  
142.15  
142.10  
138.33  
135.54  
130.51  
128.26  
127.05  
125.99  
119.56  
116.17

80.77  
77.32  
77.00  
76.68

55.98

43.05

27.87

19.00

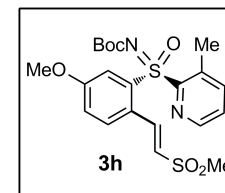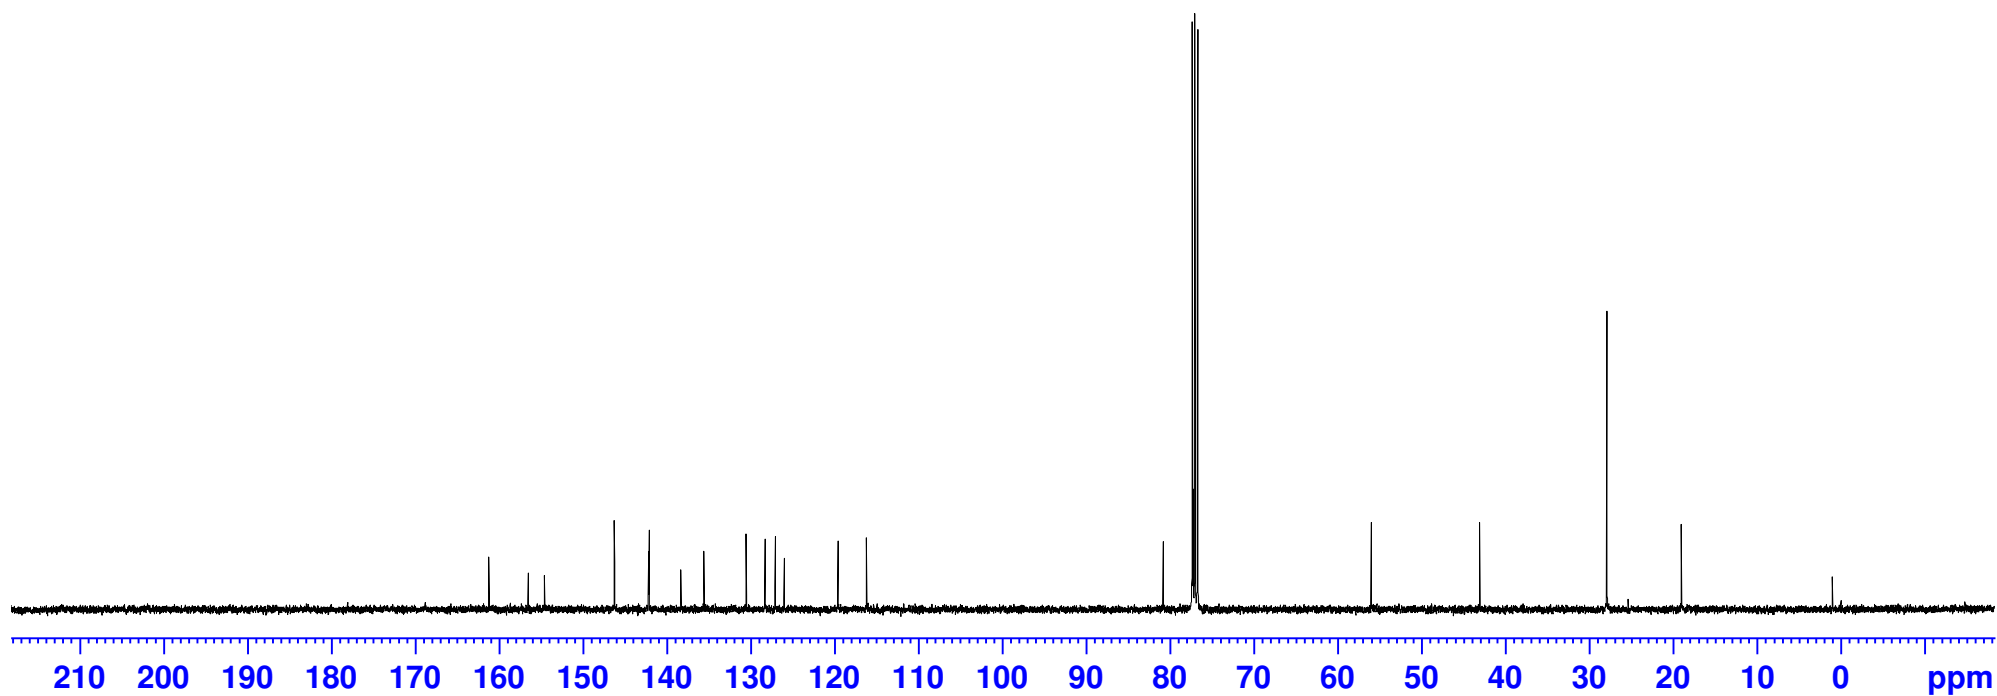



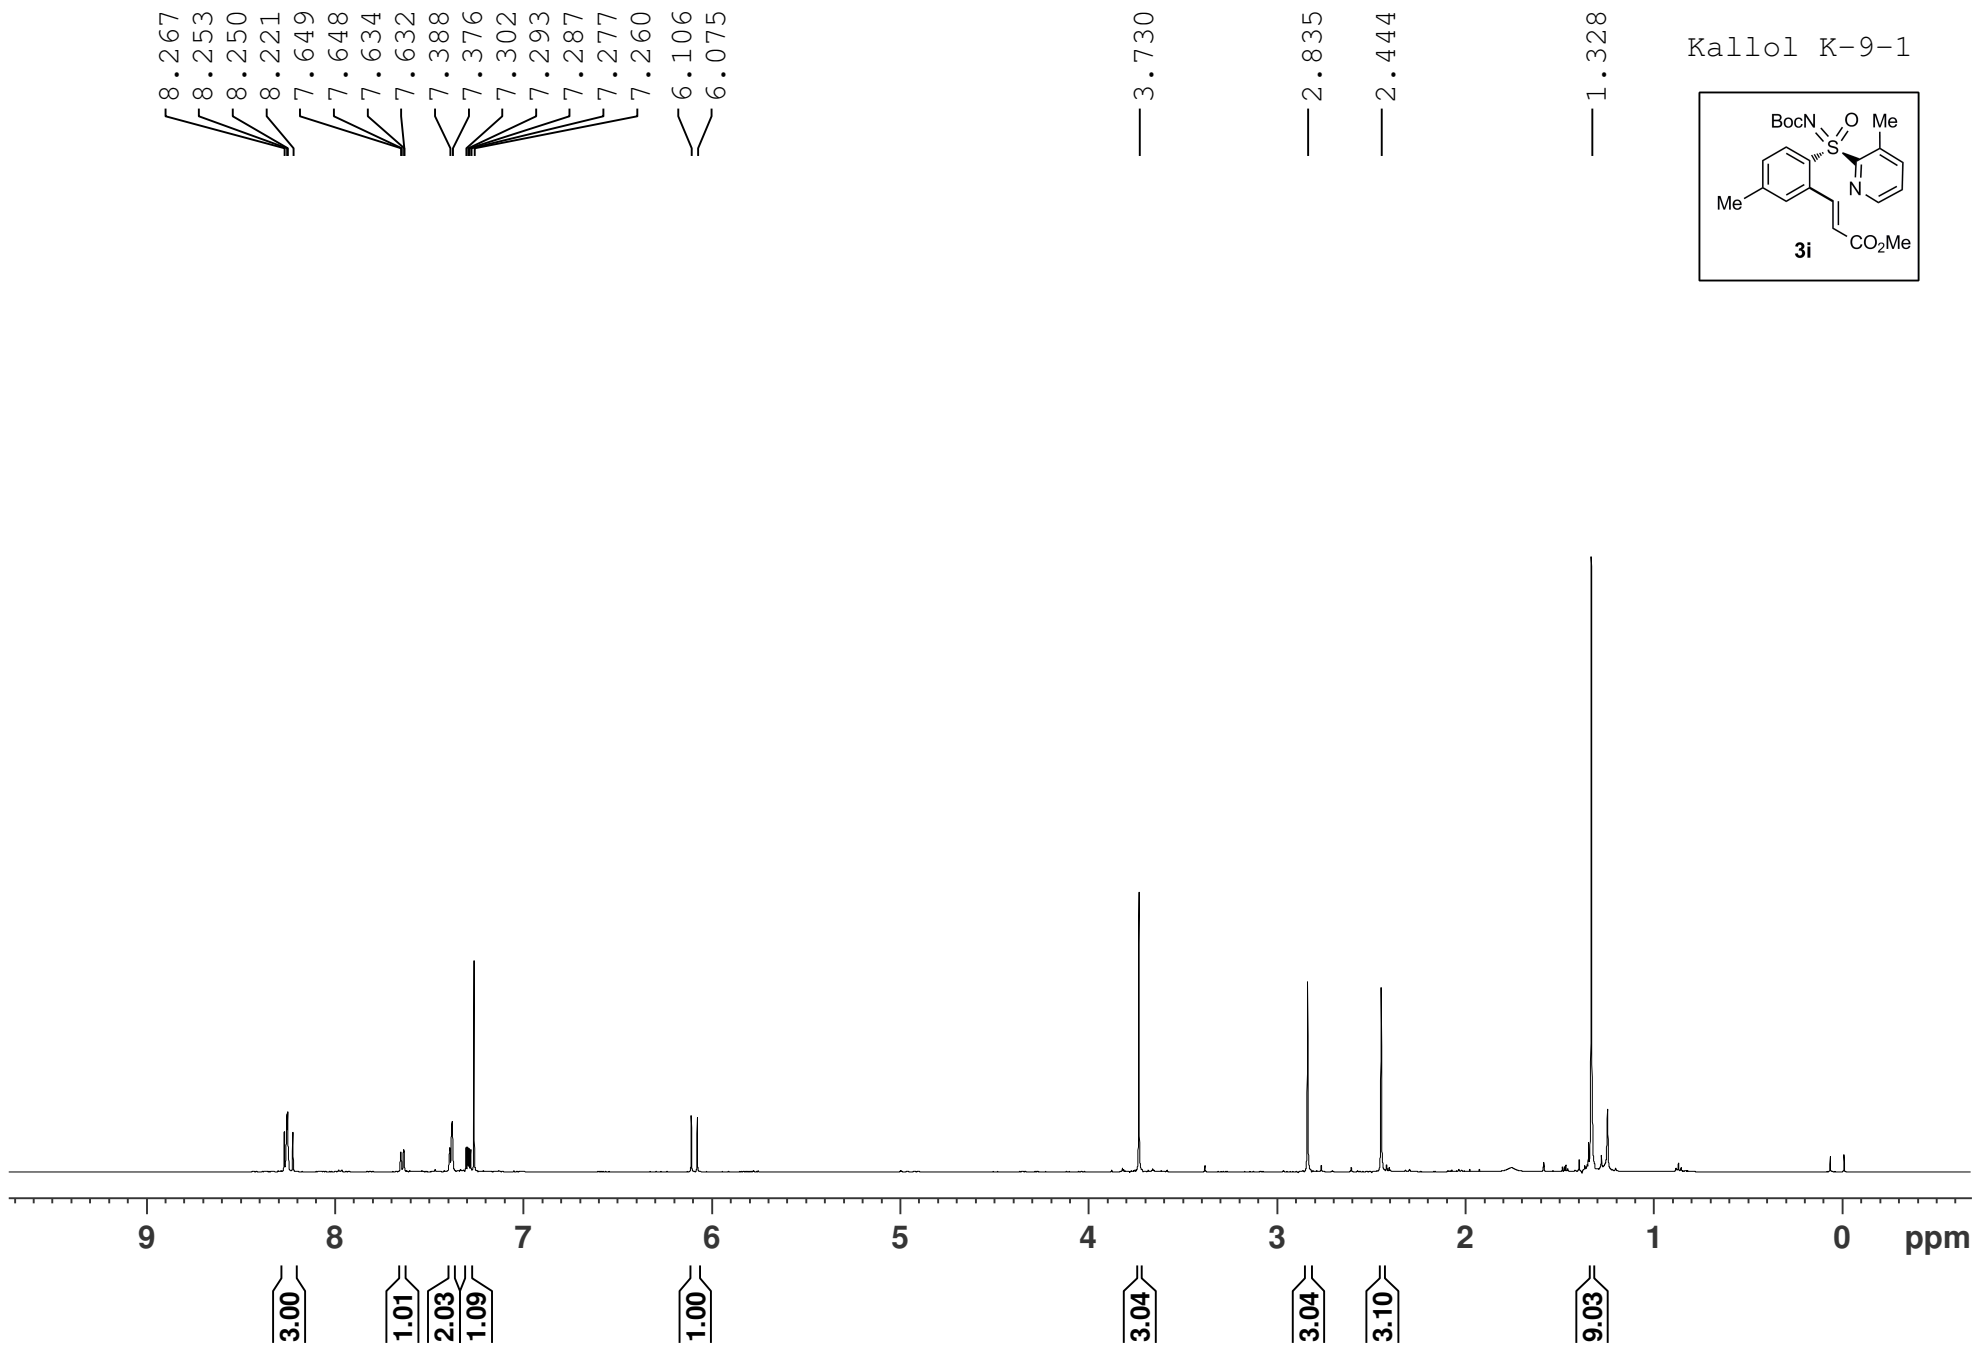

Kallol K-9-1

166.19  
157.12  
155.14  
145.95  
144.72  
141.92  
141.61  
136.10  
135.59  
133.07  
131.15  
130.31  
129.53  
126.52  
121.75

80.33  
77.25  
77.00  
76.74

51.71

27.91  
21.47  
18.96

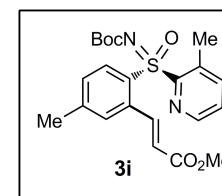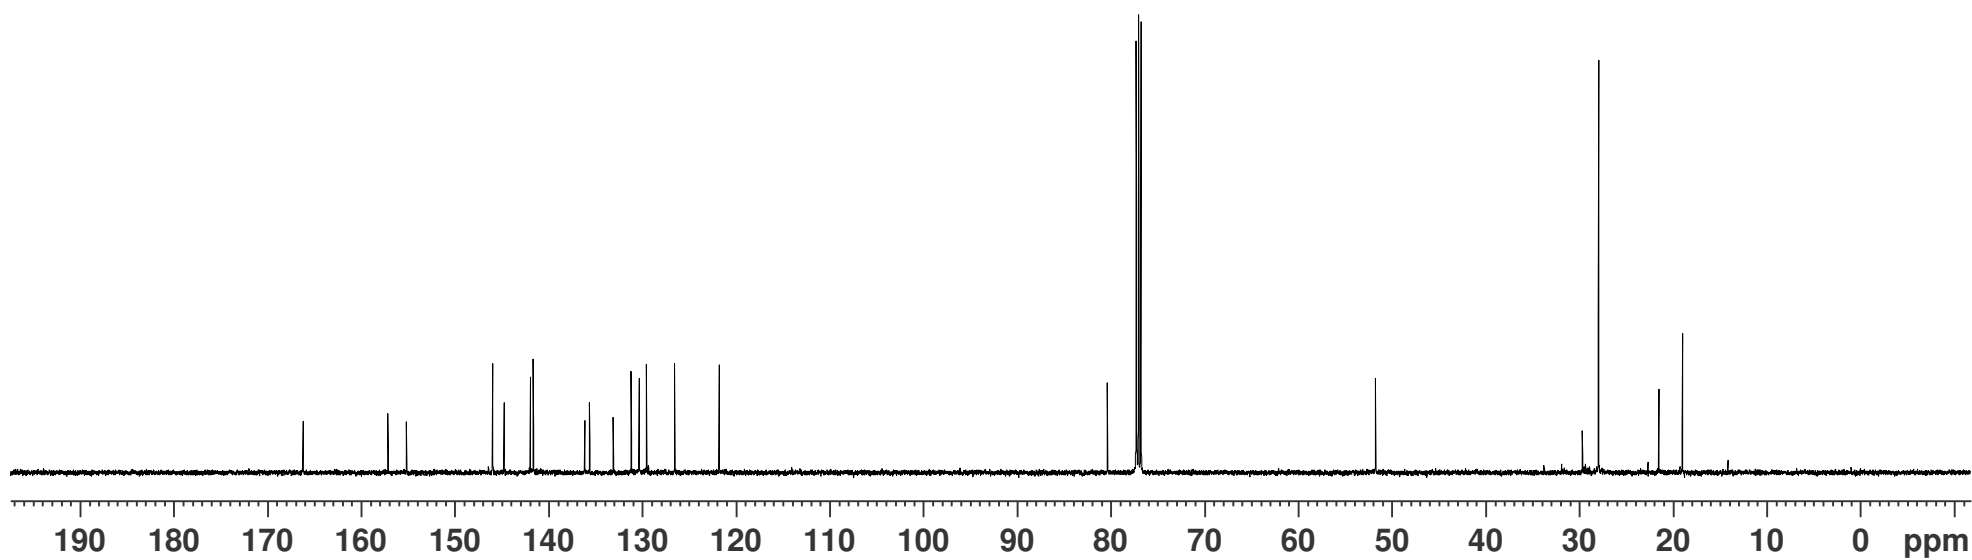

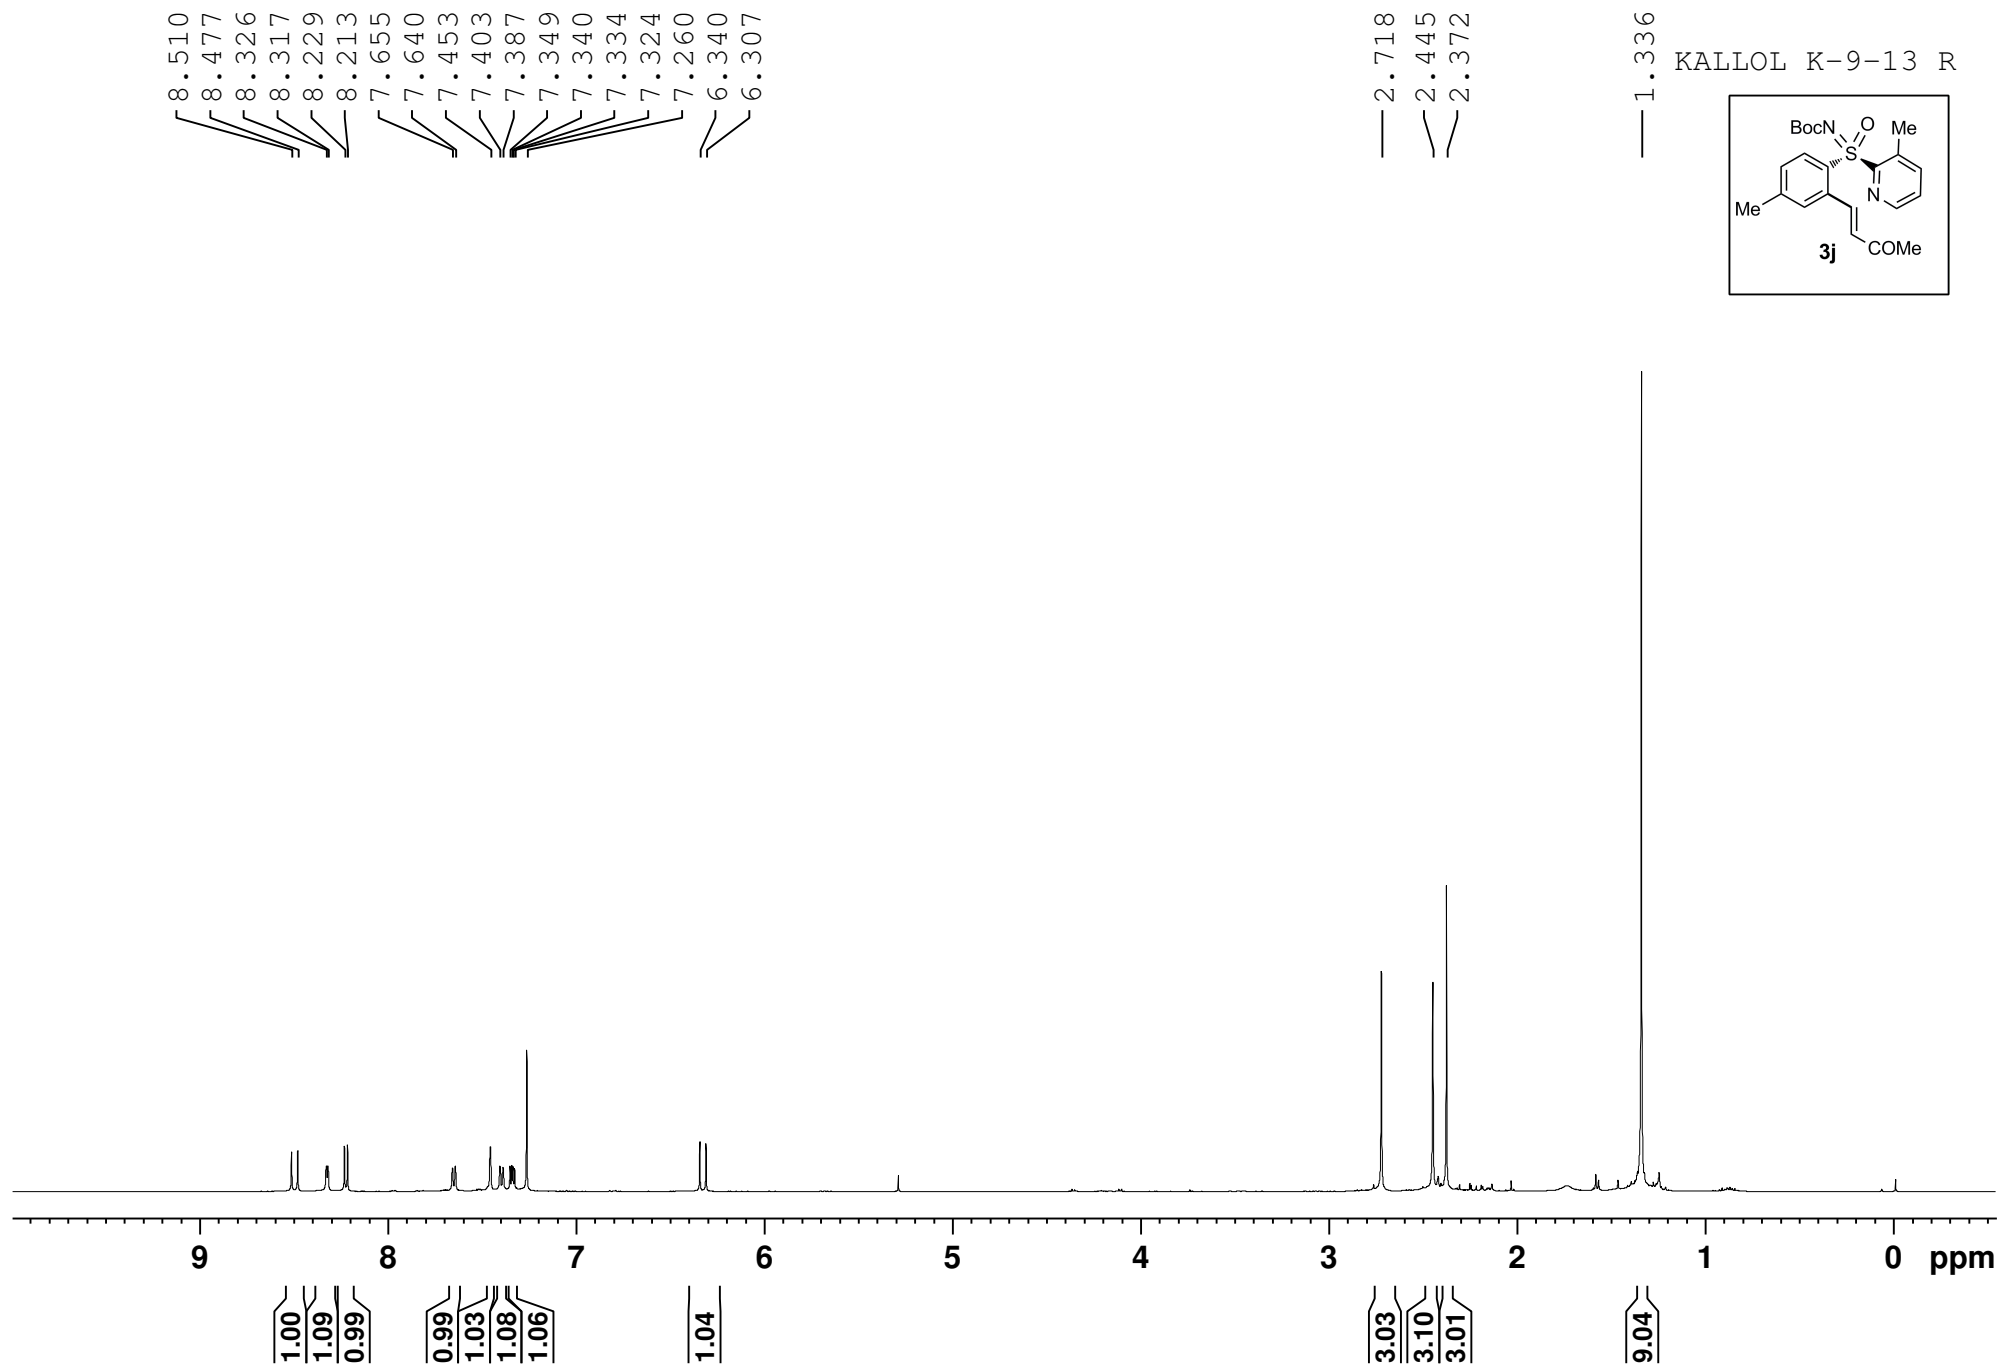

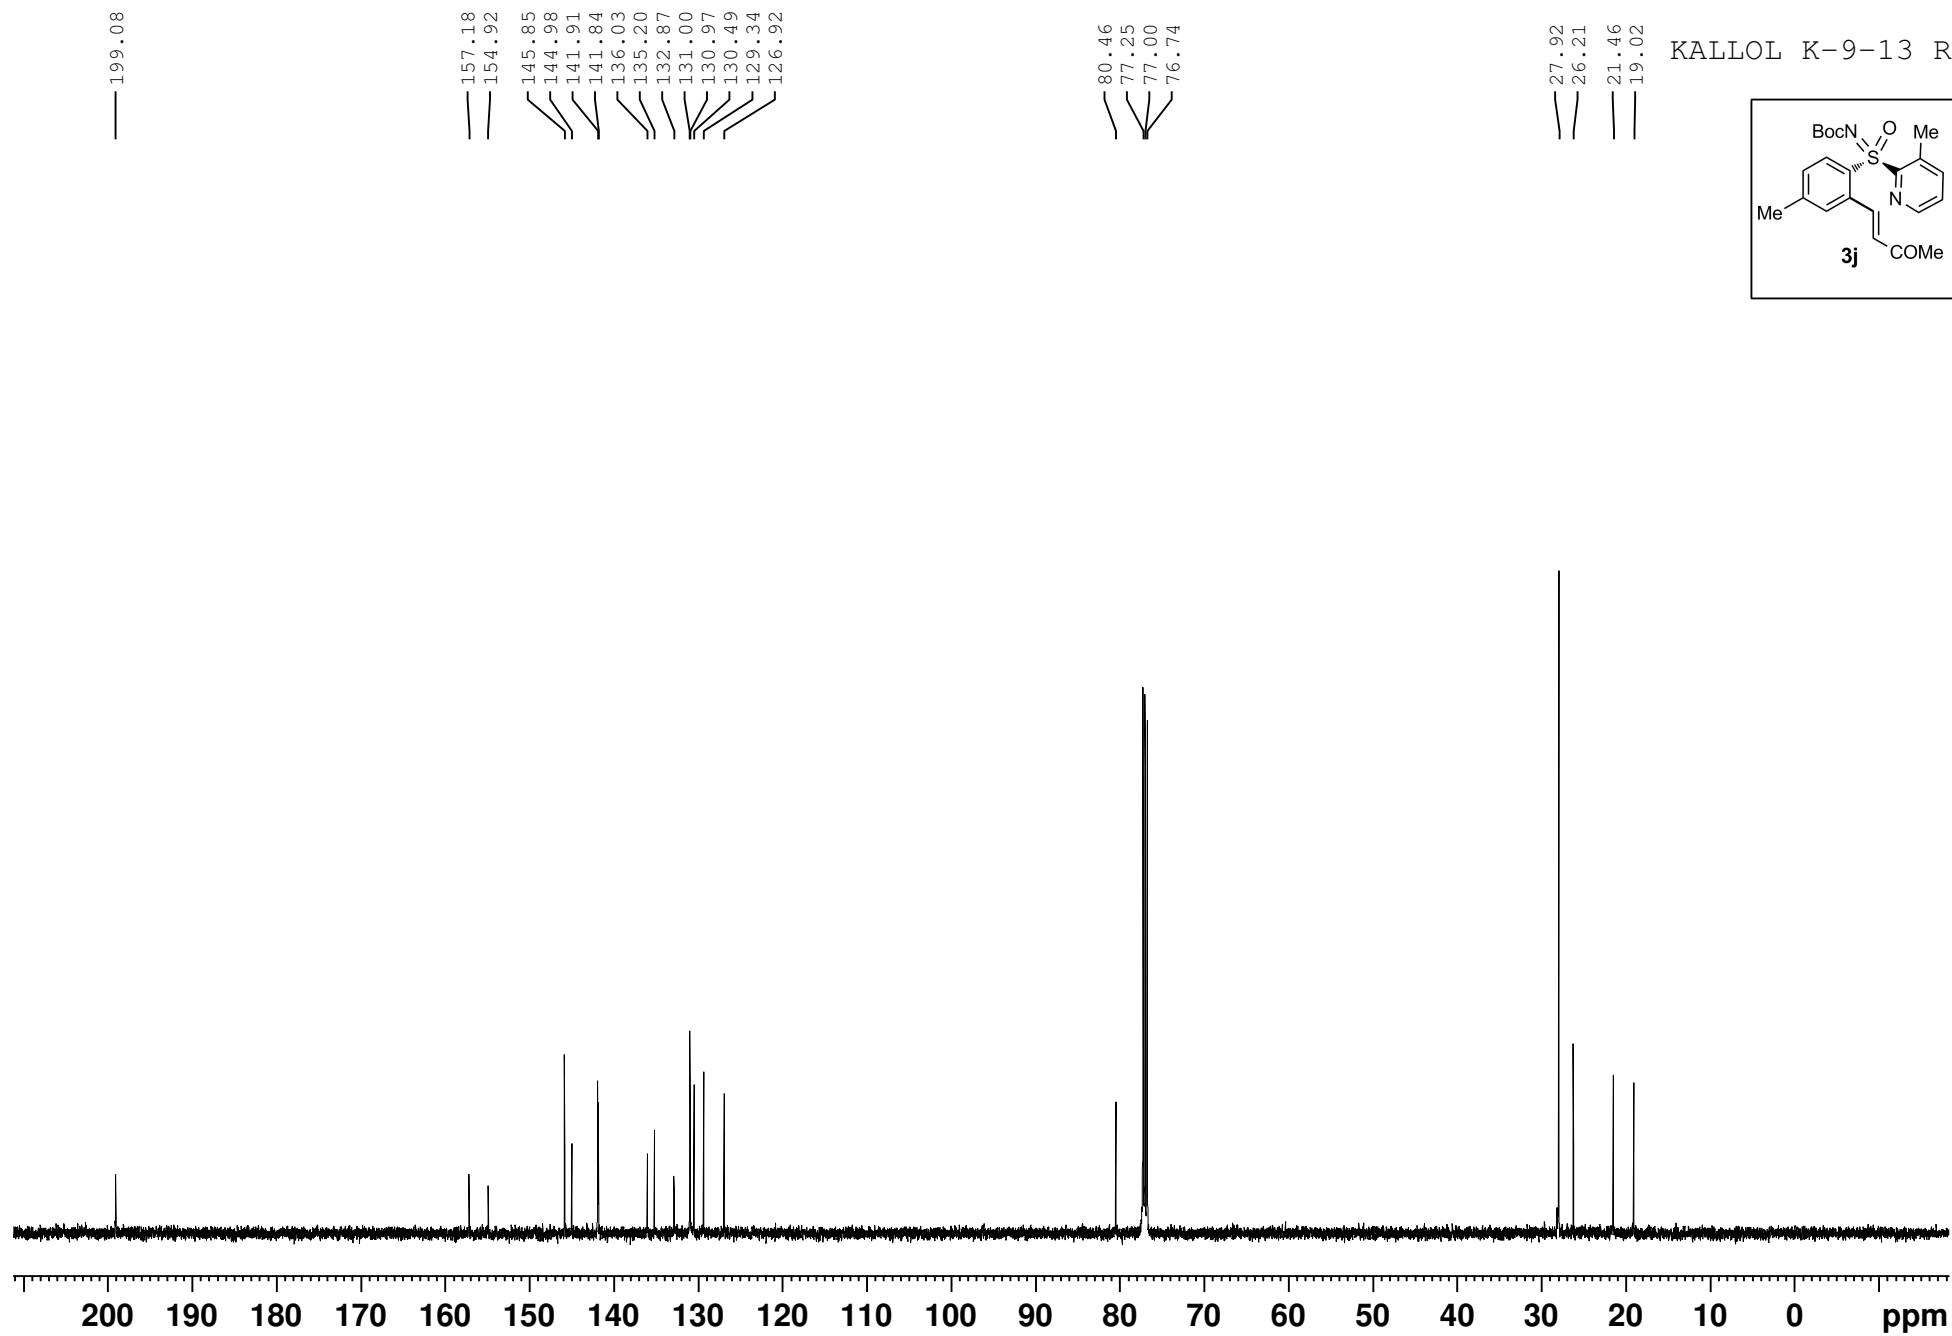

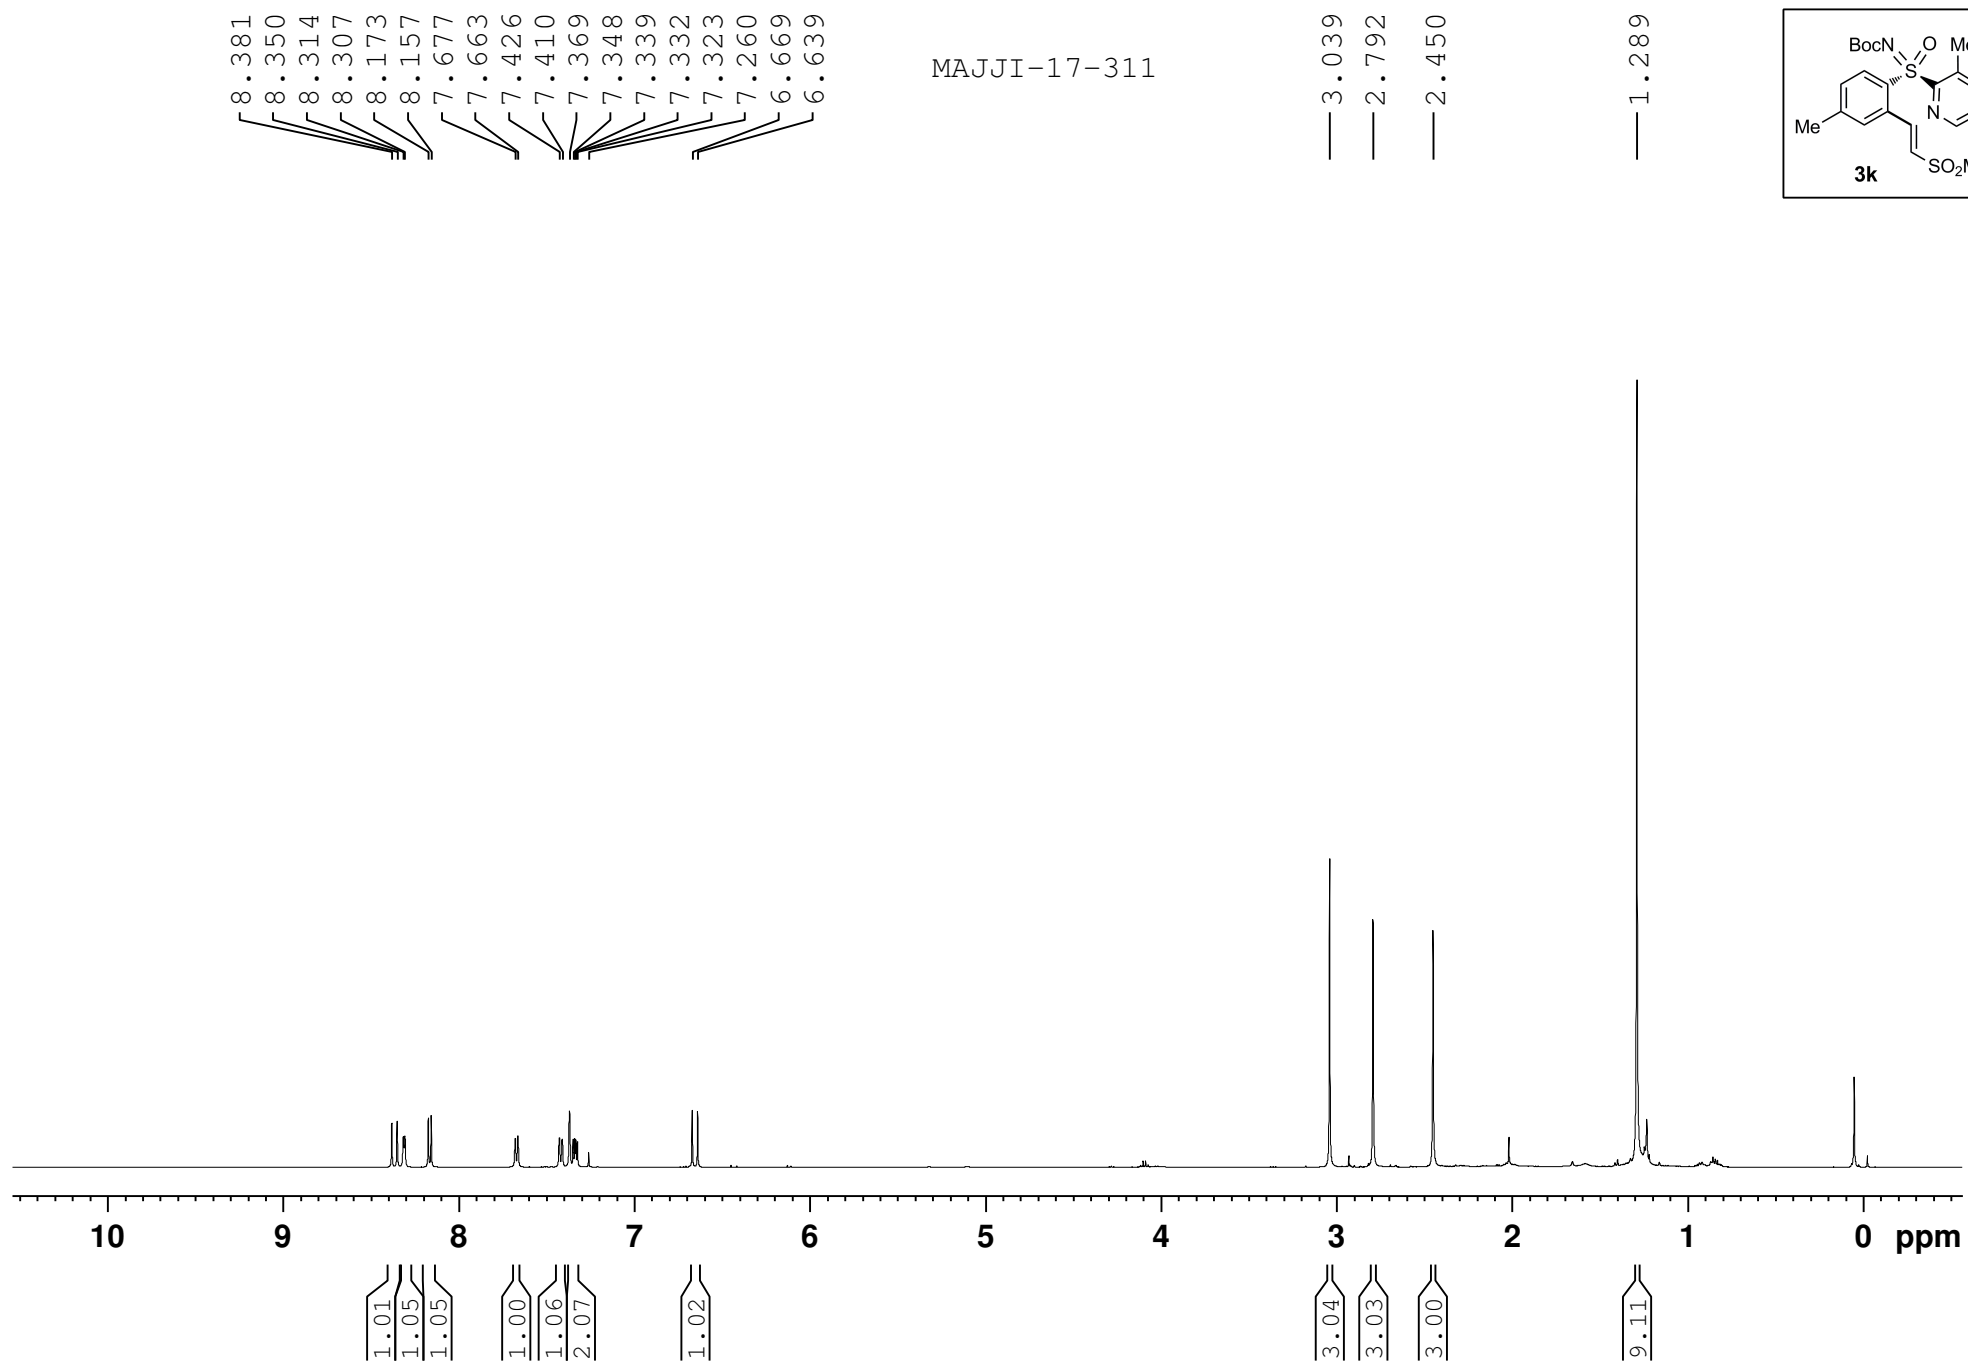

156.59  
154.80  
146.17  
145.12  
142.92  
142.01  
135.42  
134.18  
133.62  
131.02  
130.95  
129.98  
126.89

80.59  
77.31  
77.00  
76.68

42.87

27.84

21.38  
18.98

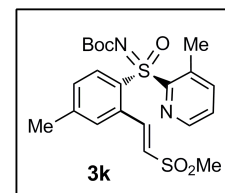

majji-MJ-17-311

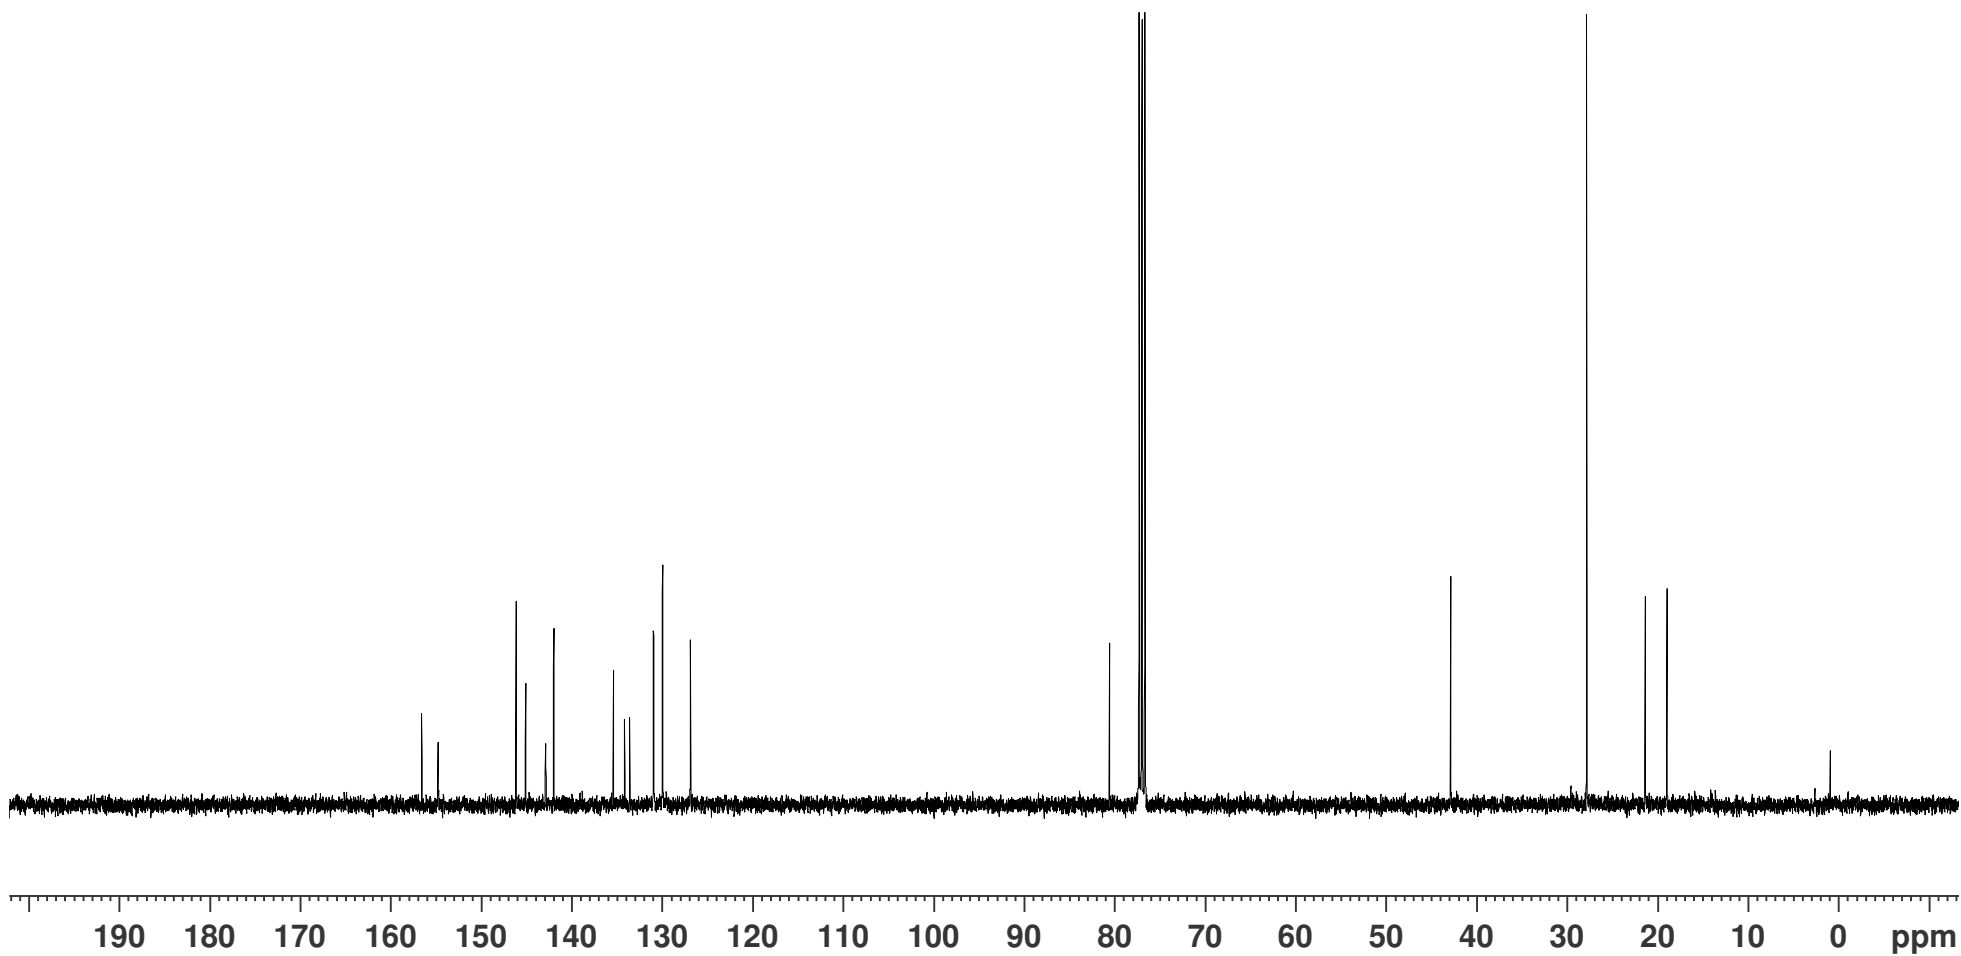

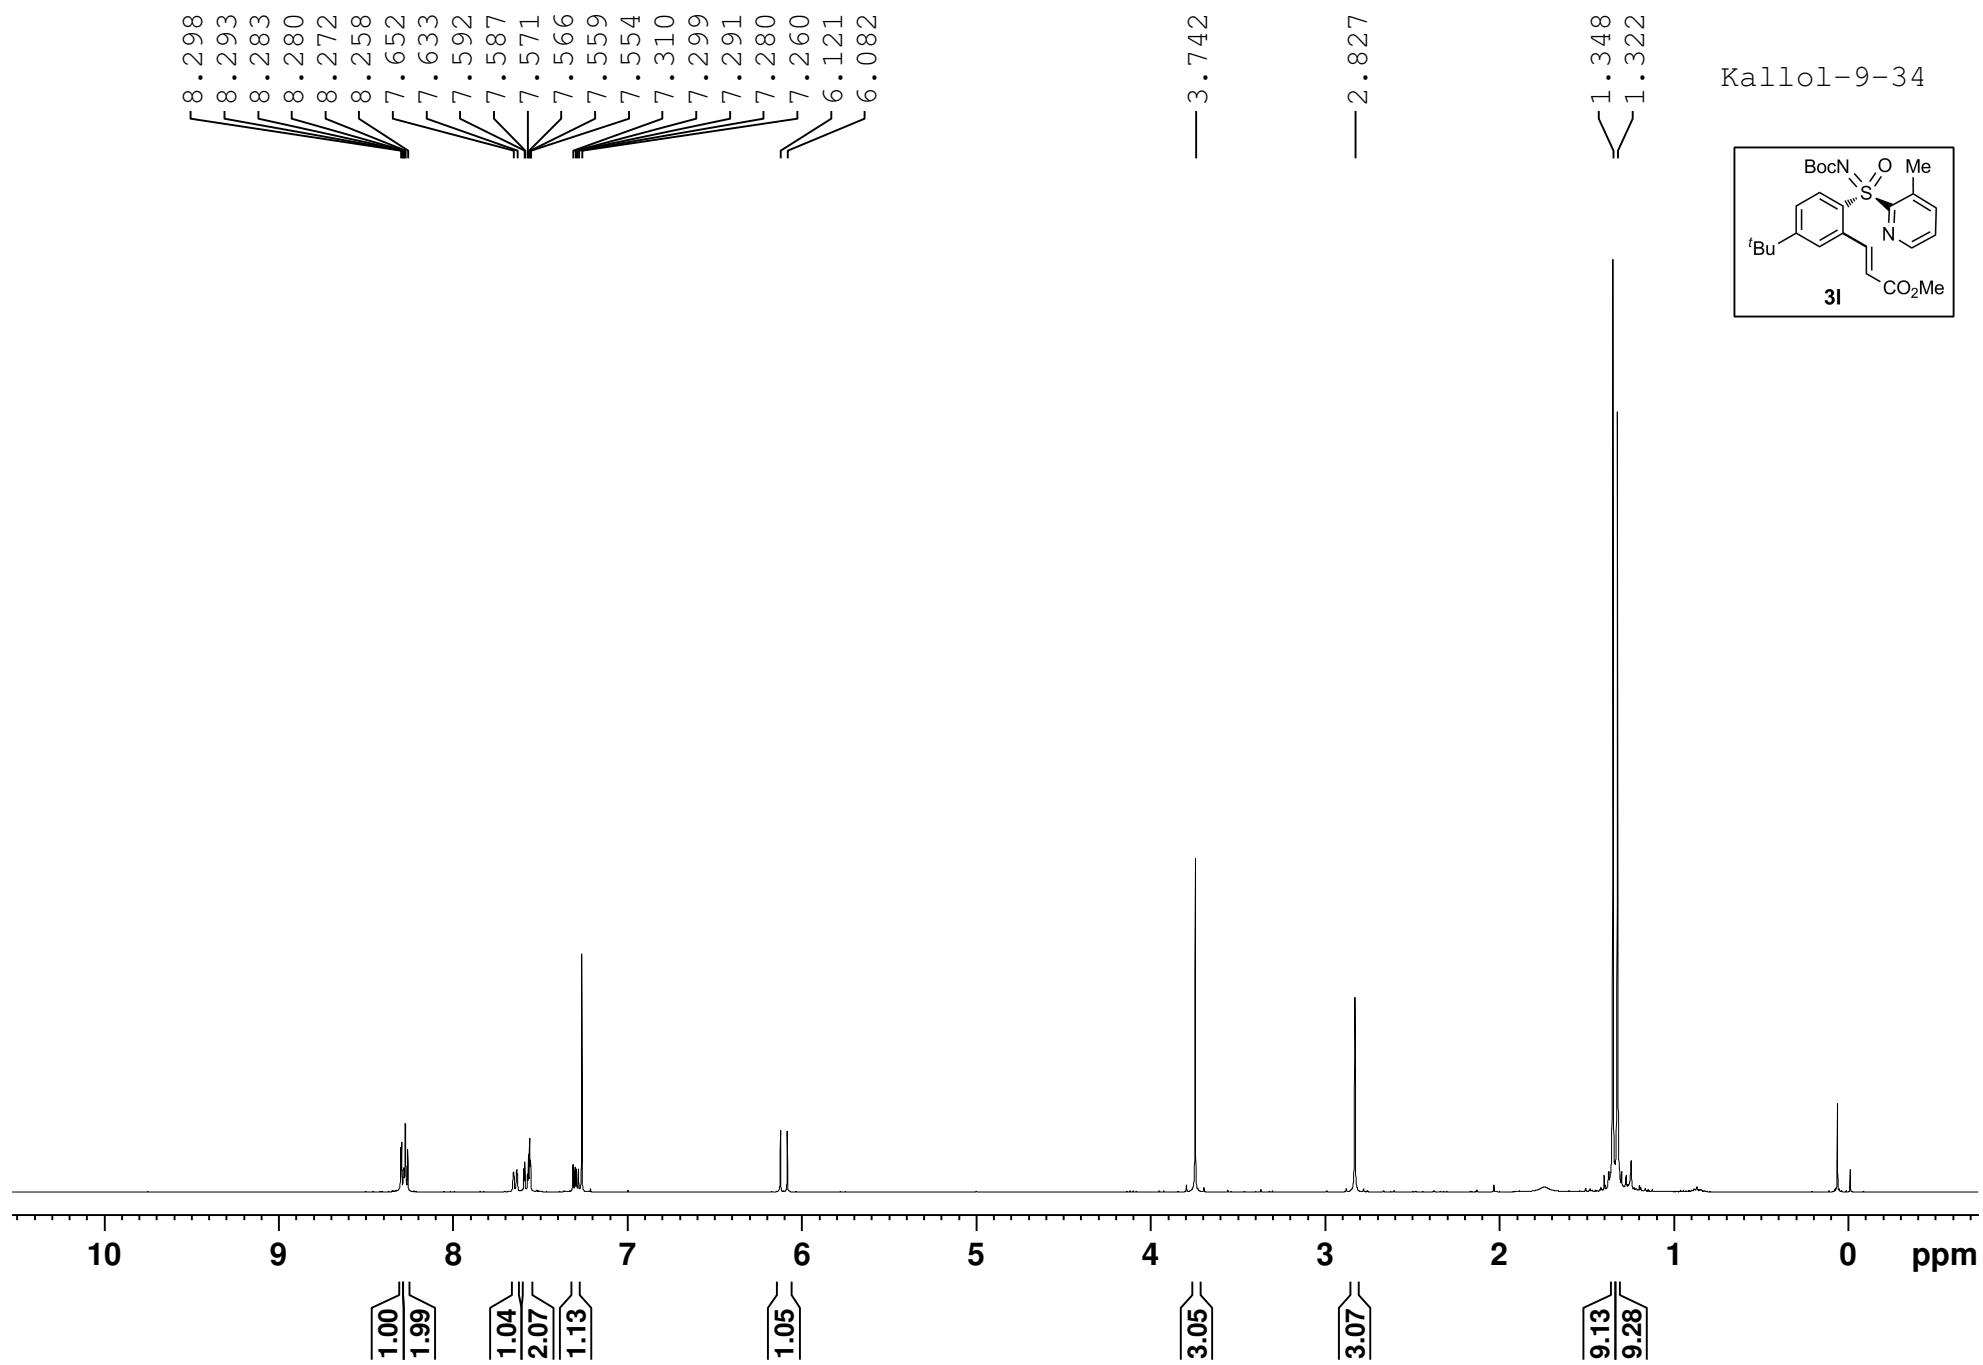

Kallol-9-34

166.25  
157.55  
157.03  
155.19  
146.01  
142.45  
141.60  
135.84  
135.60  
133.17  
130.90  
126.77  
126.51  
126.00  
121.62

80.30  
77.32  
77.00  
76.68

51.71

35.21  
30.95  
27.91

18.98

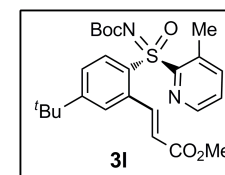

Kallol-9-34

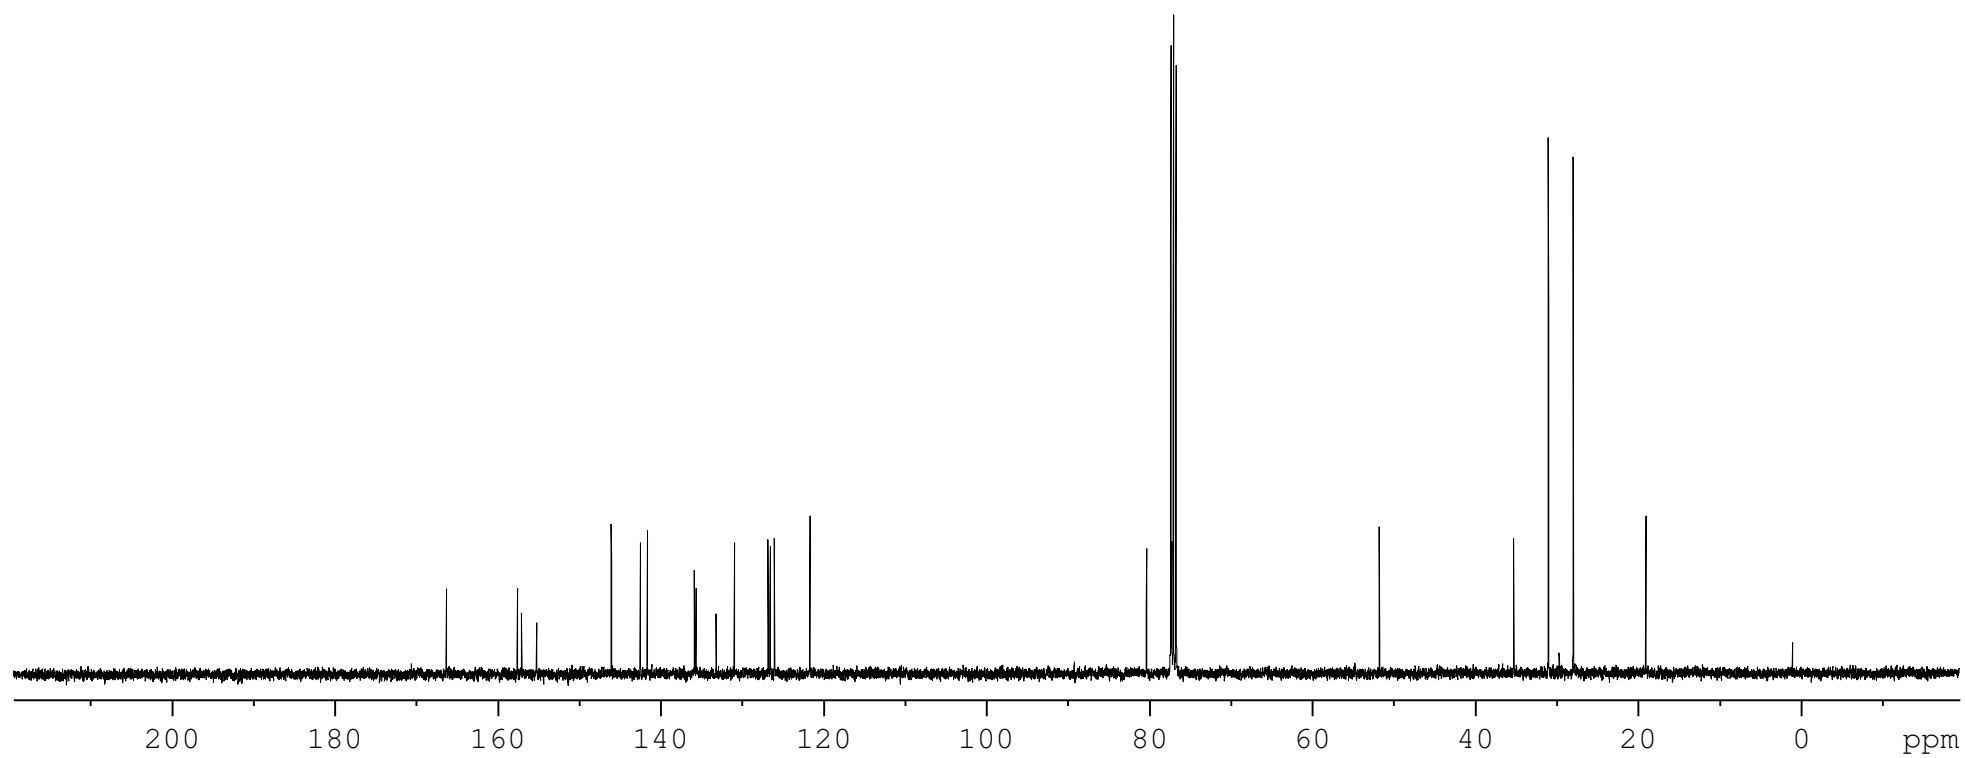



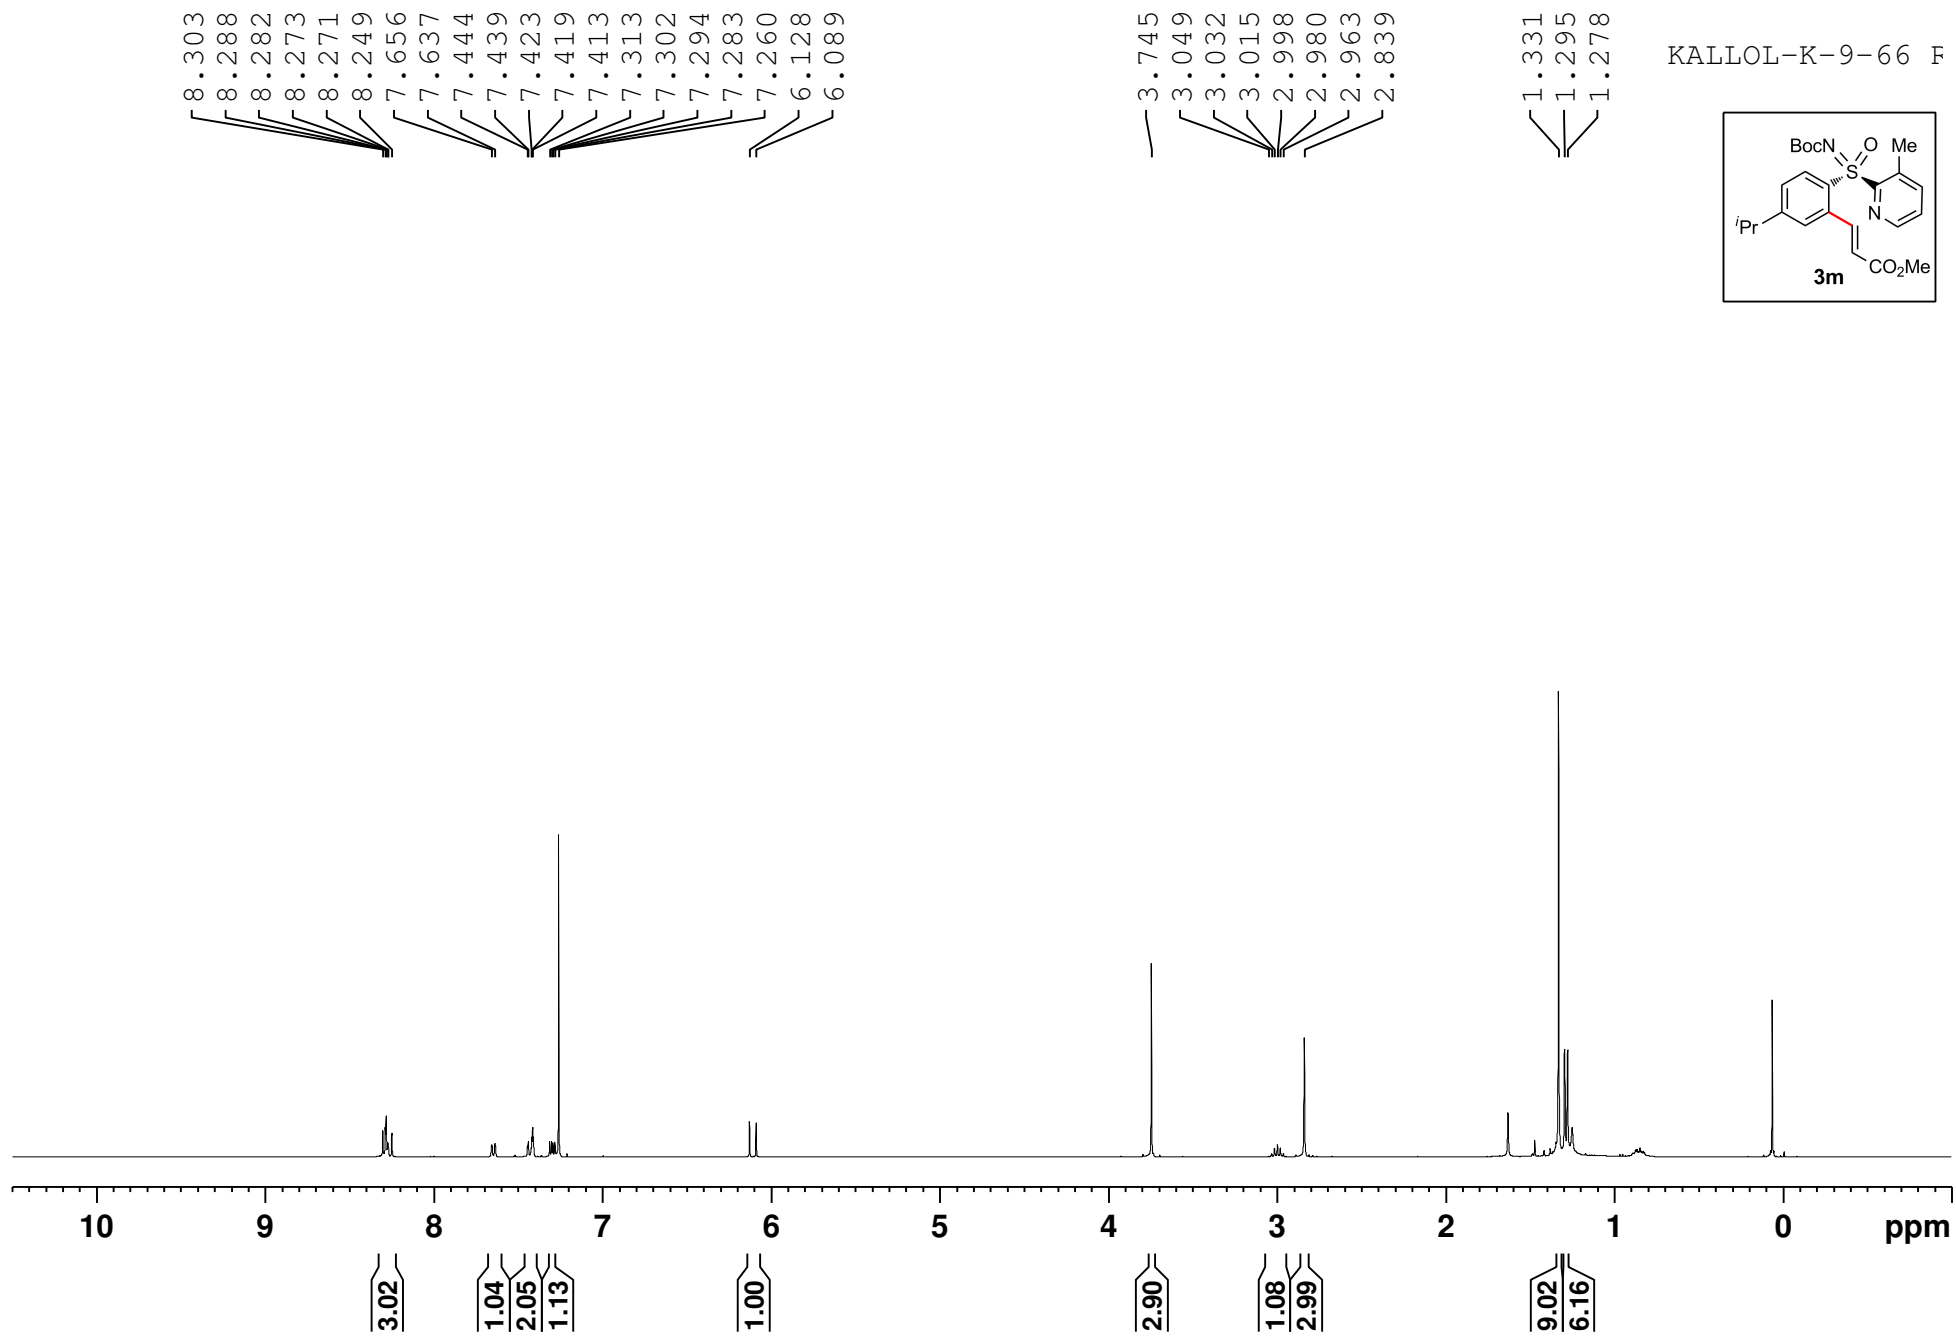

KALLOL-K-9-66 F

166.25

157.06  
155.25

146.02  
142.21  
141.60  
136.23  
135.65  
133.51  
131.23  
127.77  
127.12  
126.50  
121.71

80.31  
77.31  
77.00  
76.68

51.71

34.11

27.94

23.53

23.46

19.02

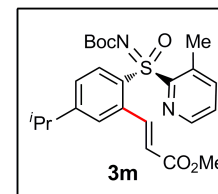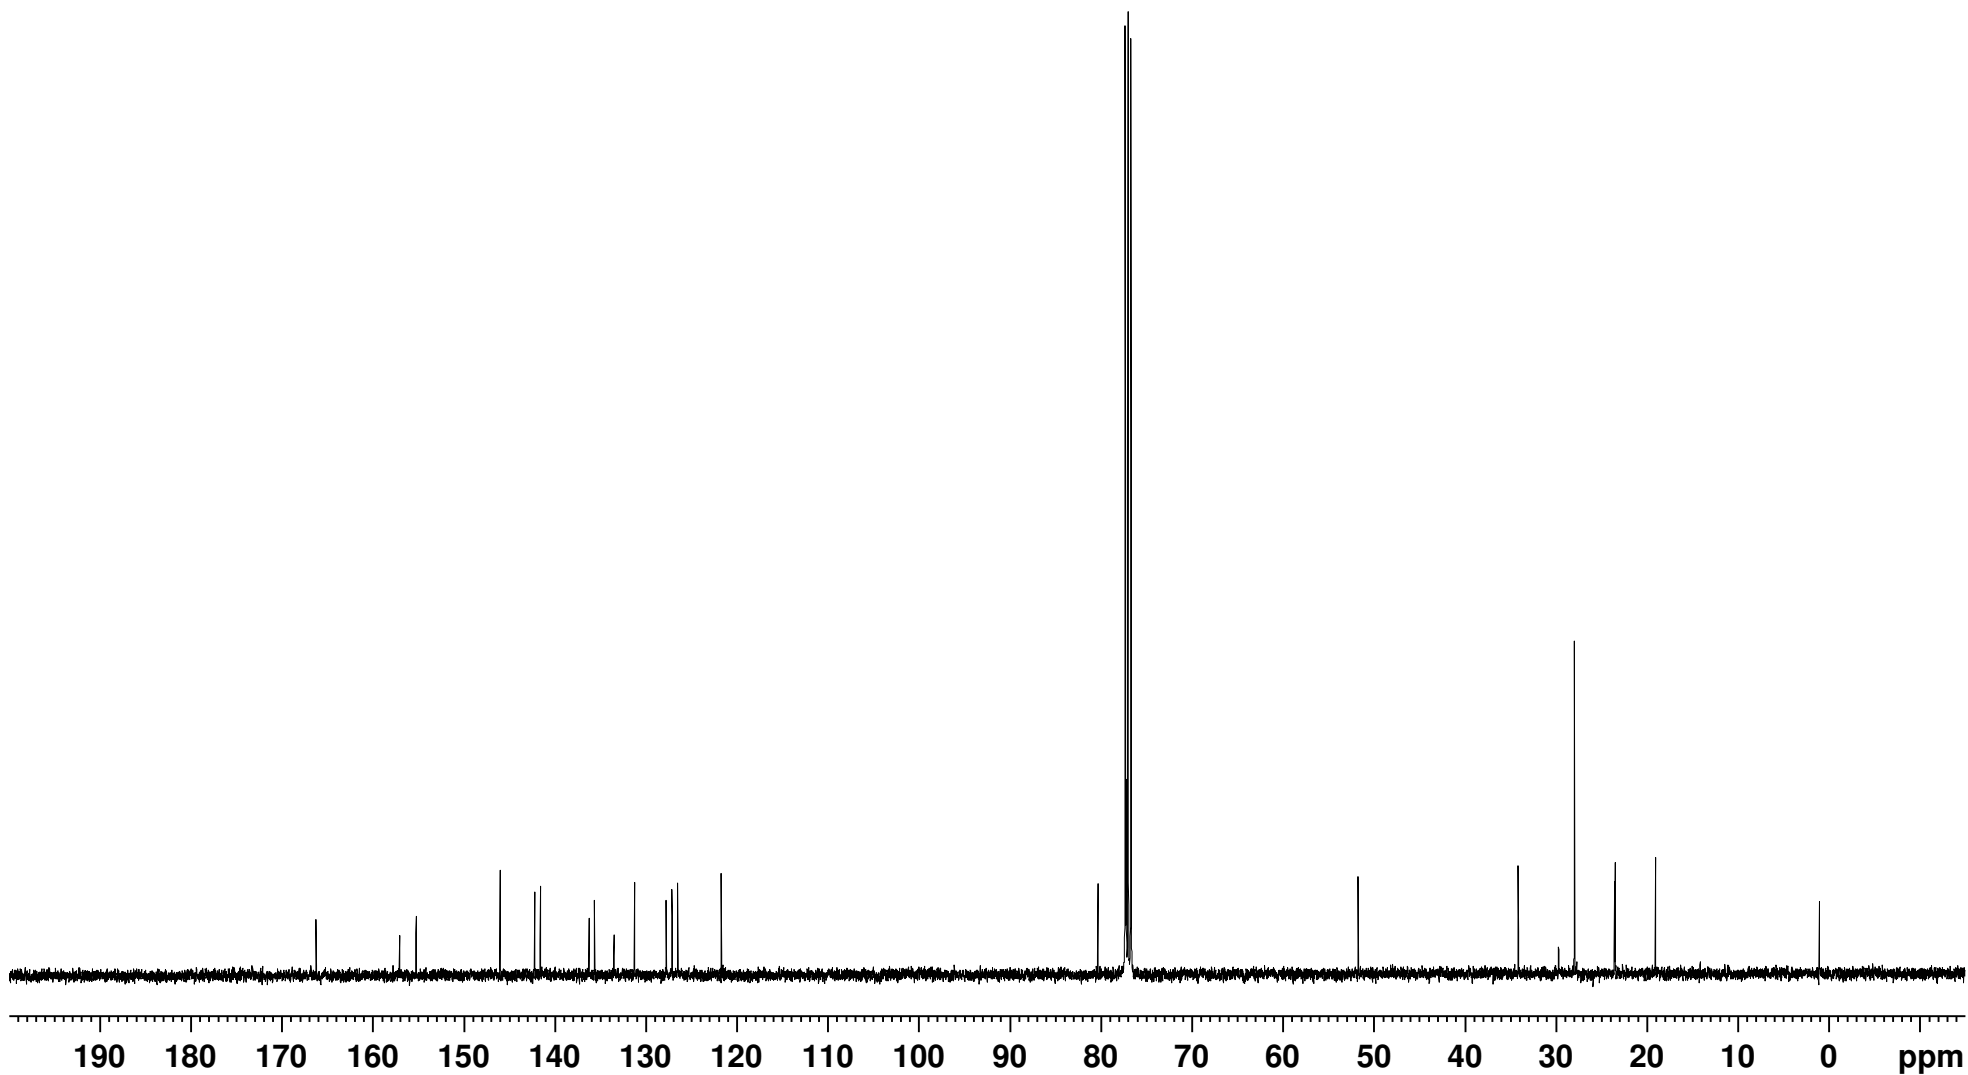

8.264  
8.262  
8.255  
8.253  
8.211  
8.179  
7.898  
7.892  
7.661  
7.660  
7.658  
7.646  
7.644  
7.643  
7.641  
7.543  
7.526  
7.313  
7.304  
7.297  
7.288  
7.260  
7.123  
7.118  
7.106  
7.101  
6.060  
6.029

4.151  
4.137  
4.124  
4.110  
3.714

2.840

1.438  
1.424  
1.410  
1.326

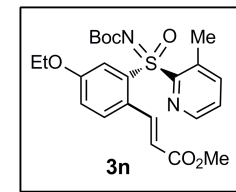

KALLOL K-9-64 e

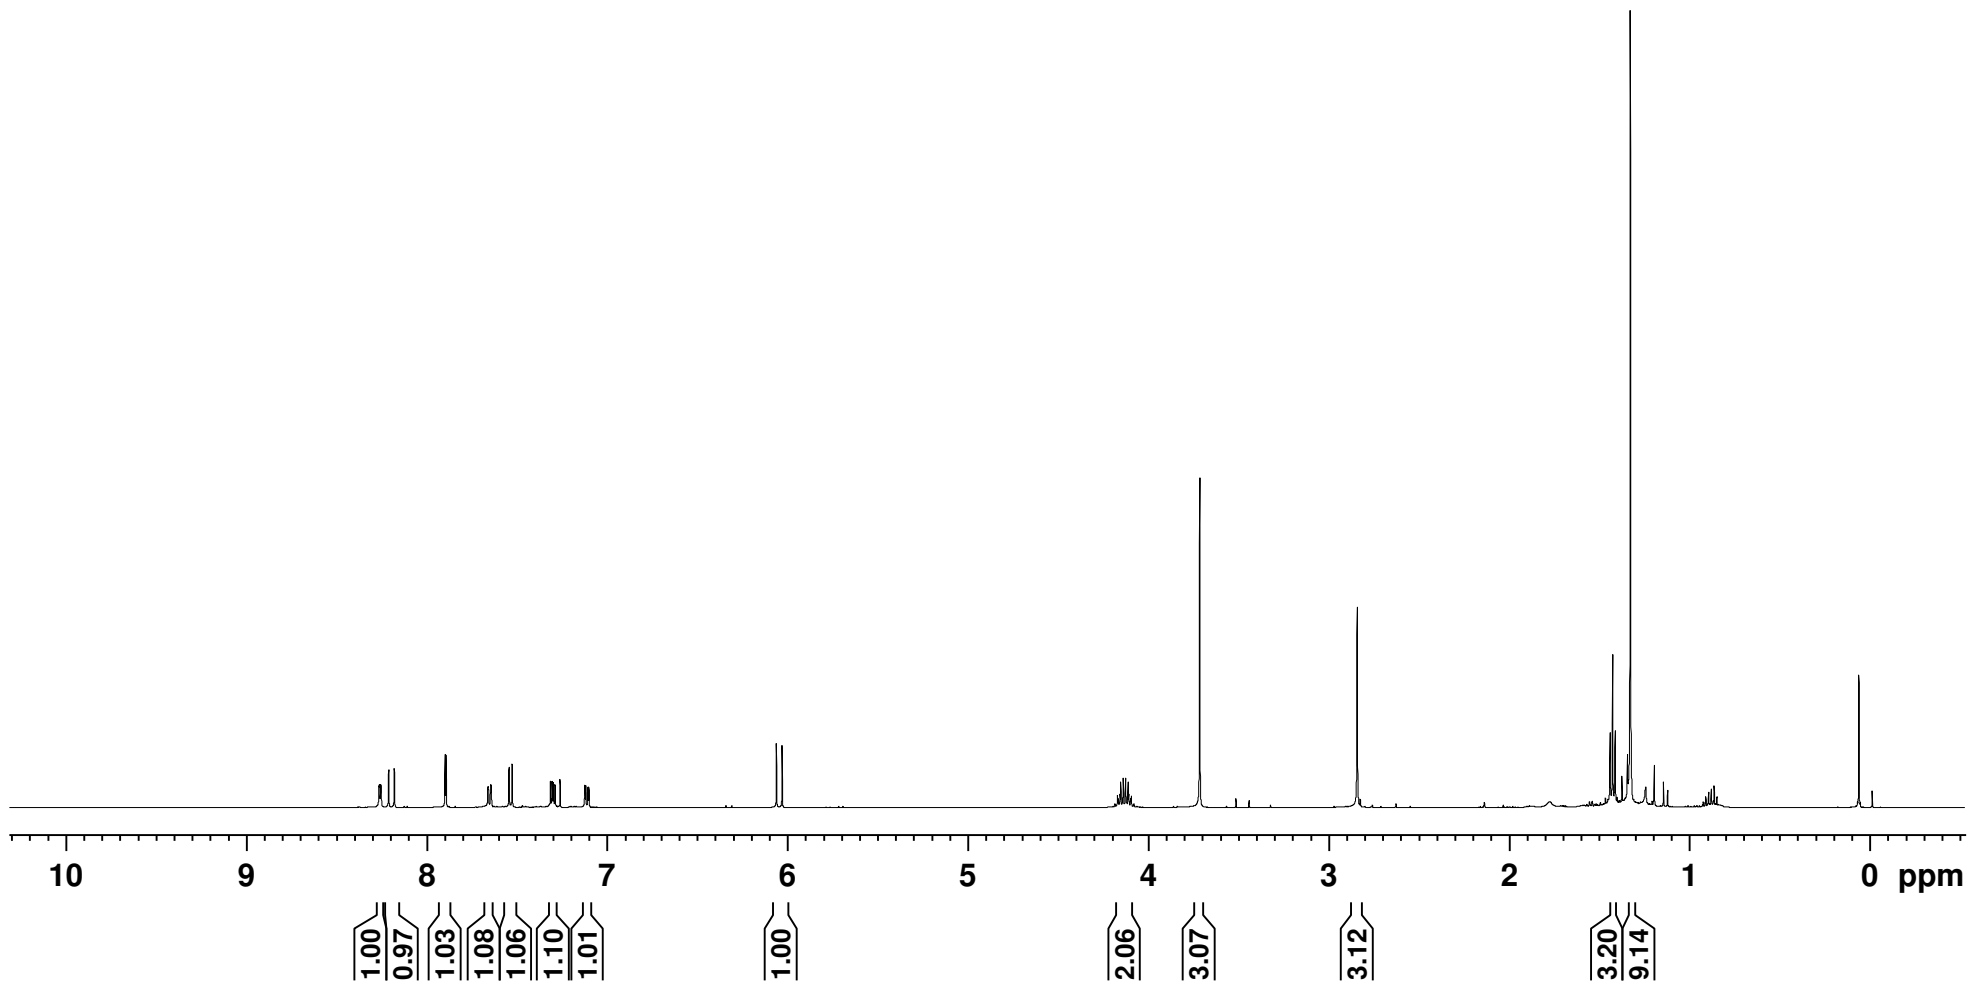

KALLOL K-9-64 e

166.48  
159.94  
156.92  
155.01  
145.99  
141.64  
141.21  
137.52  
135.60  
129.95  
127.85  
126.61  
120.11  
119.84  
116.28

80.42  
77.25  
77.00  
76.74

64.27

51.59

27.89

18.94

14.55

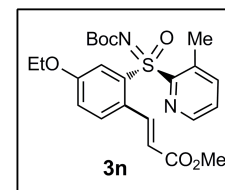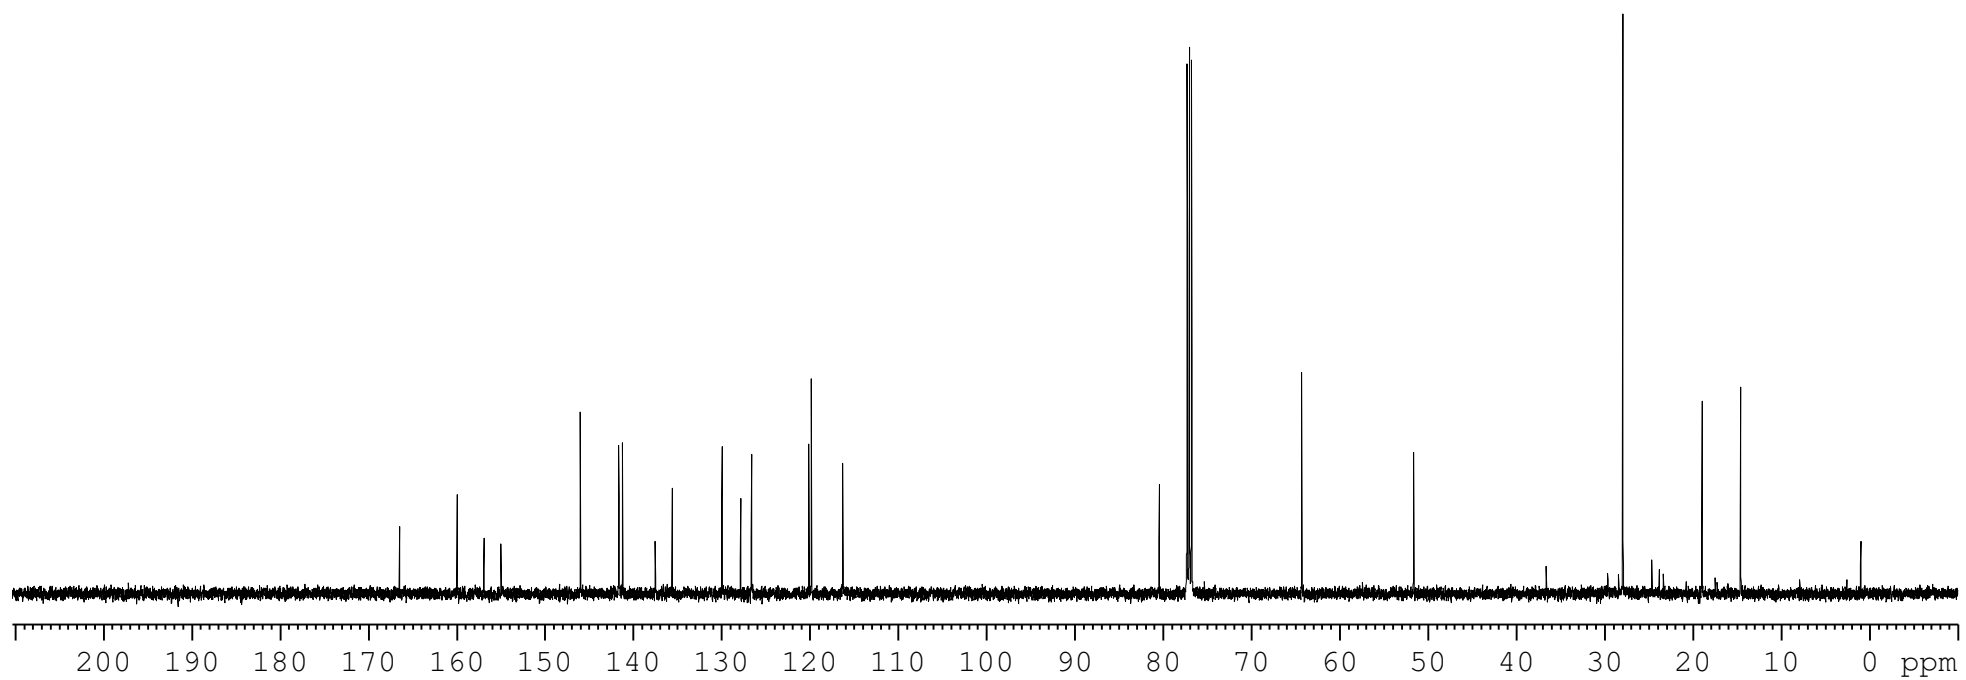

KALLOL-9-20

8.260  
8.253  
8.232  
8.201  
7.664  
7.648  
7.497  
7.482  
7.443  
7.426  
7.311  
7.302  
7.295  
7.286  
7.260  
6.094  
6.062

— 3.732  
— 2.874  
— 2.474  
— 1.340

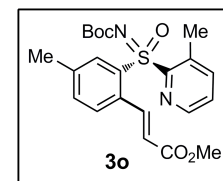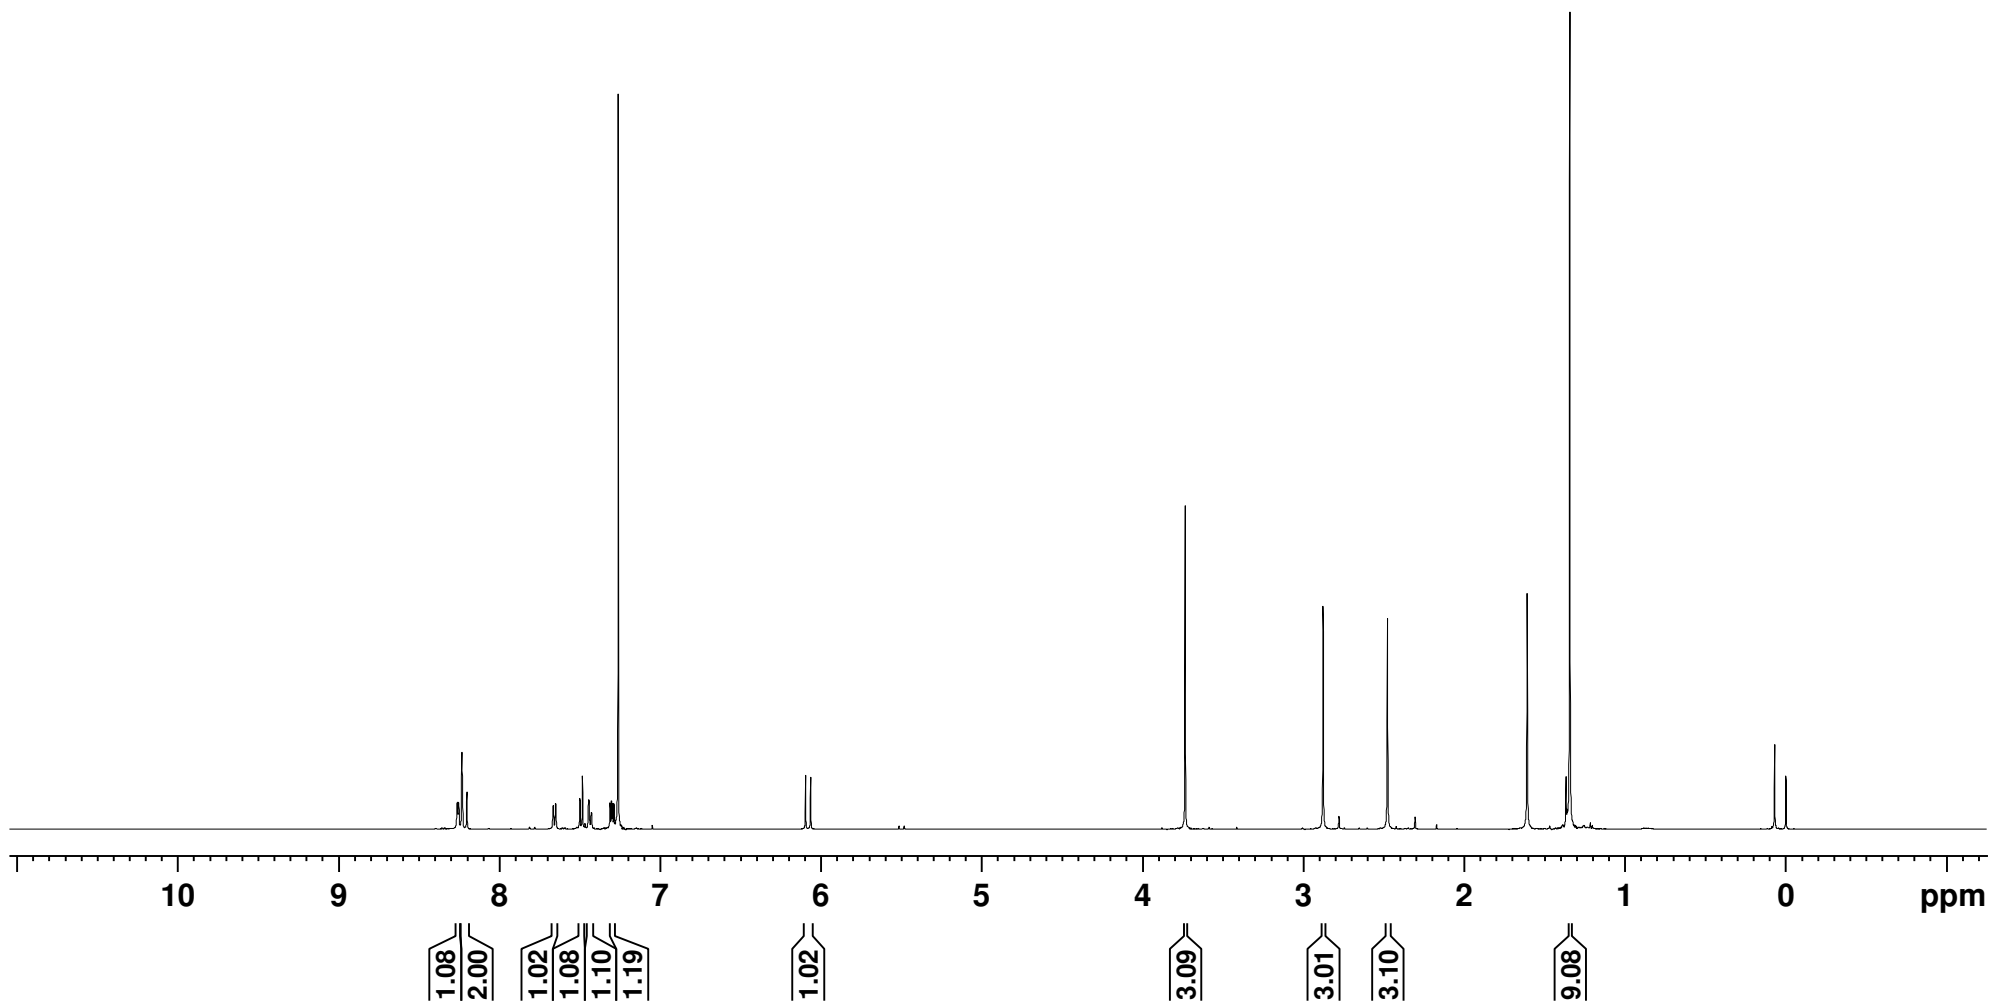

KALLOL-9-20

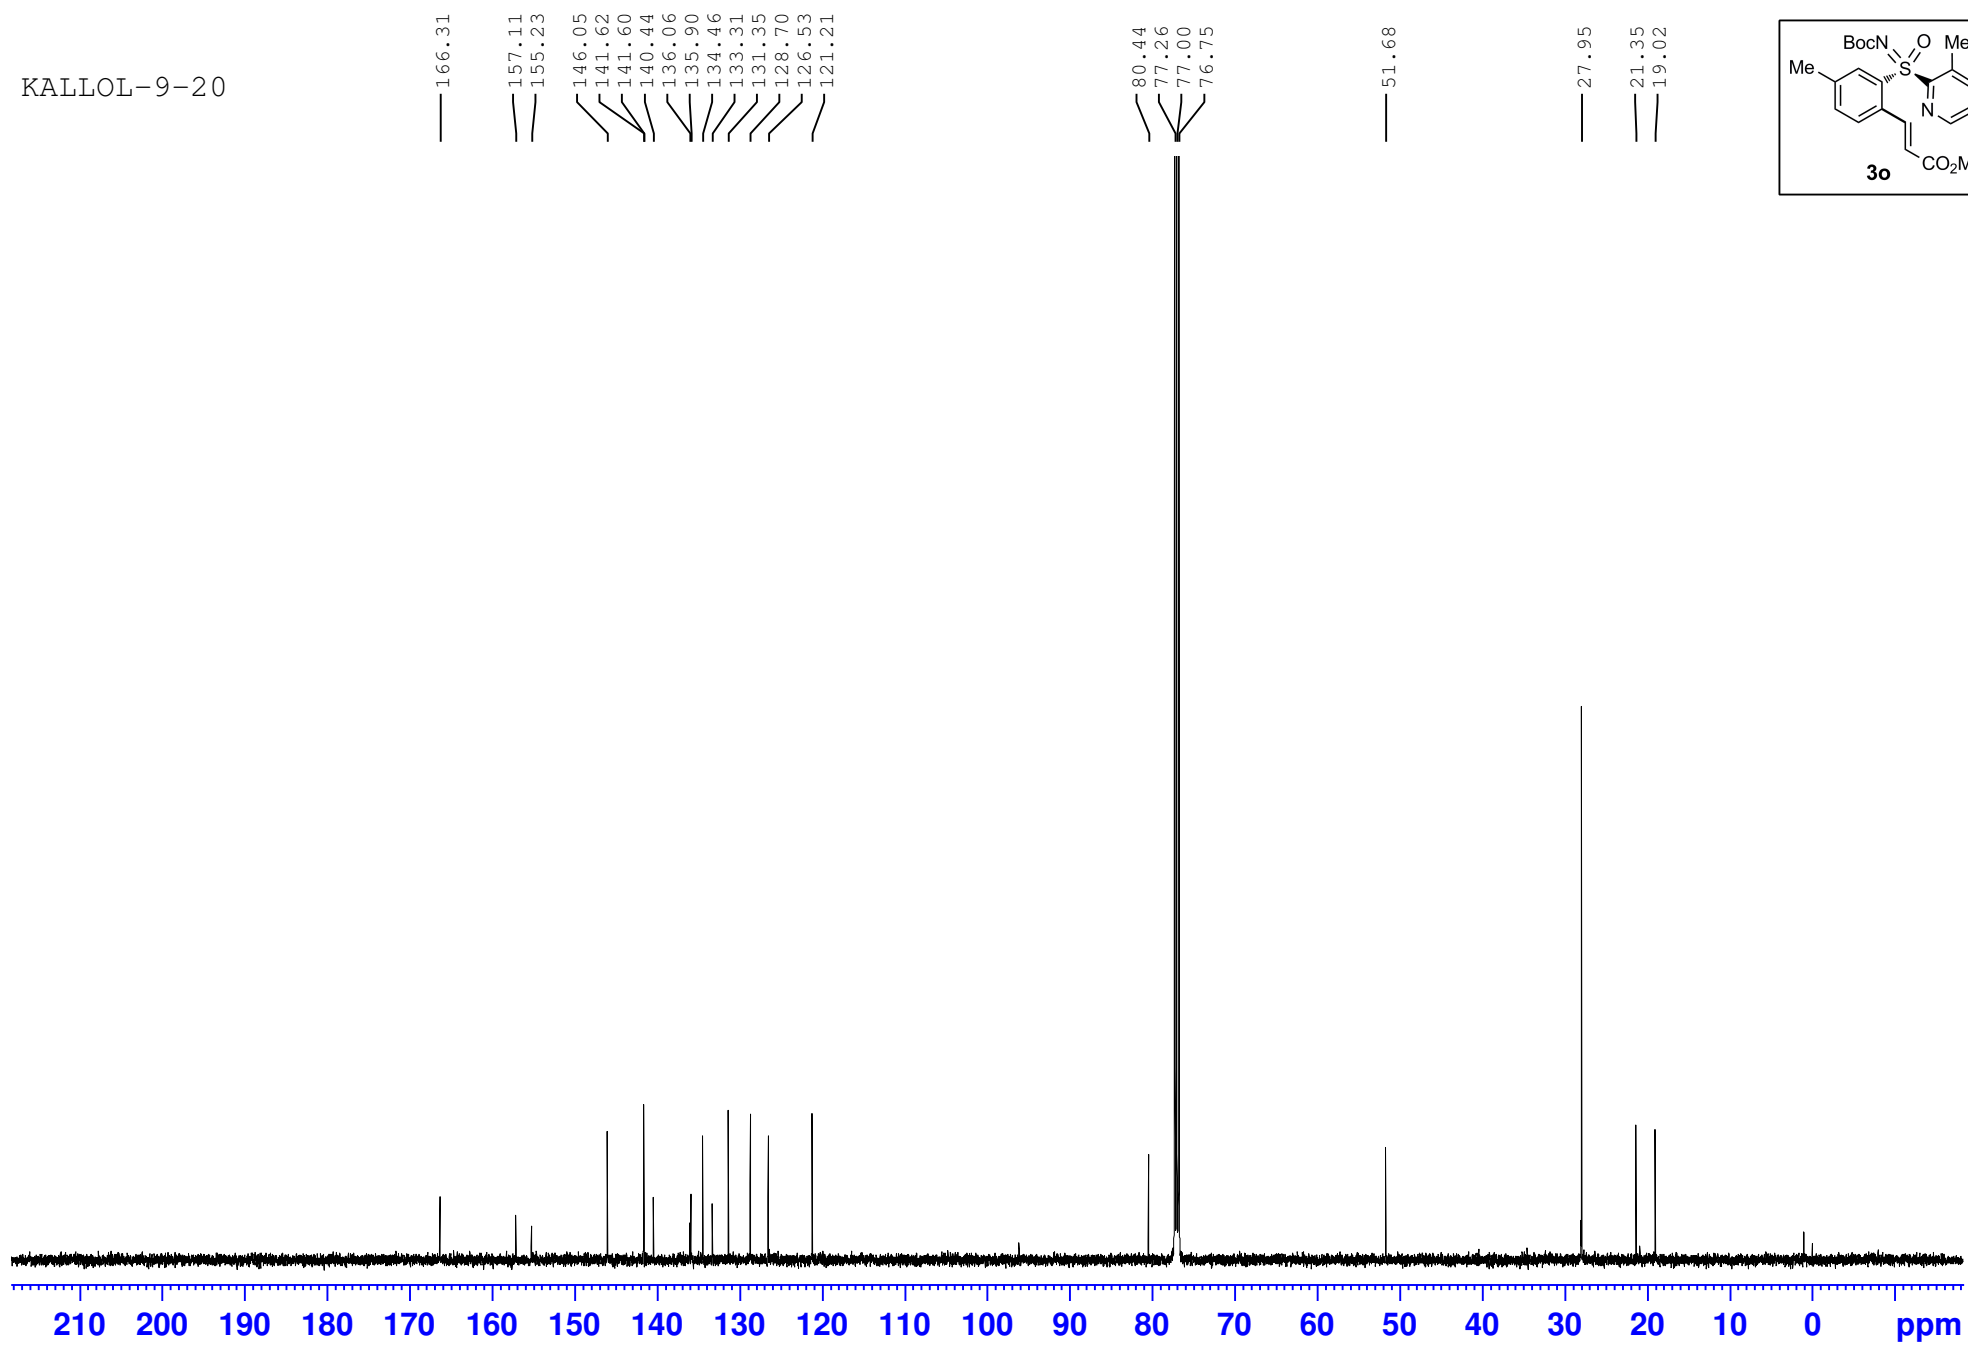

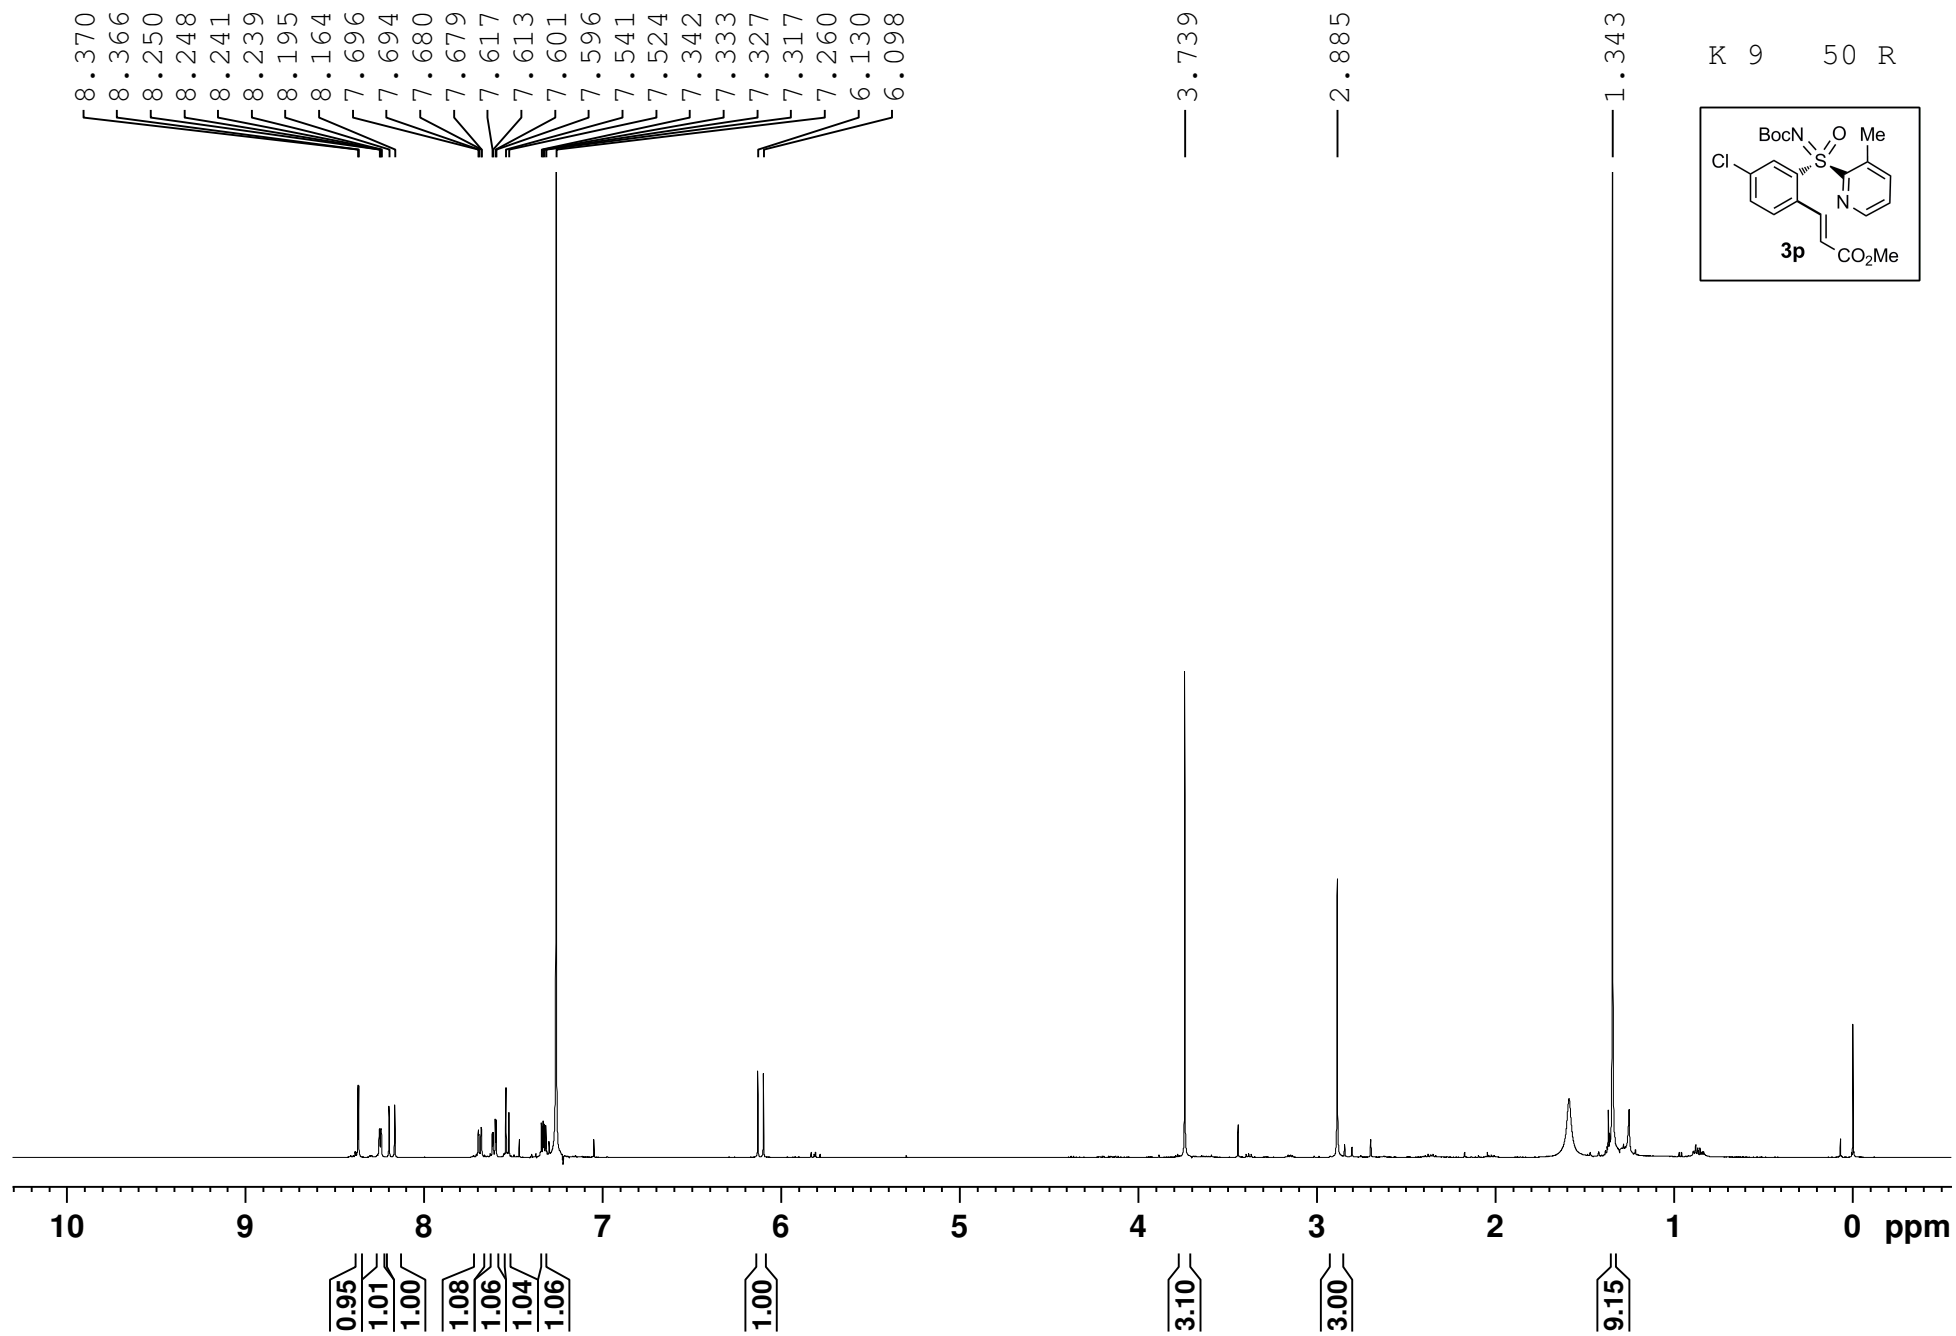

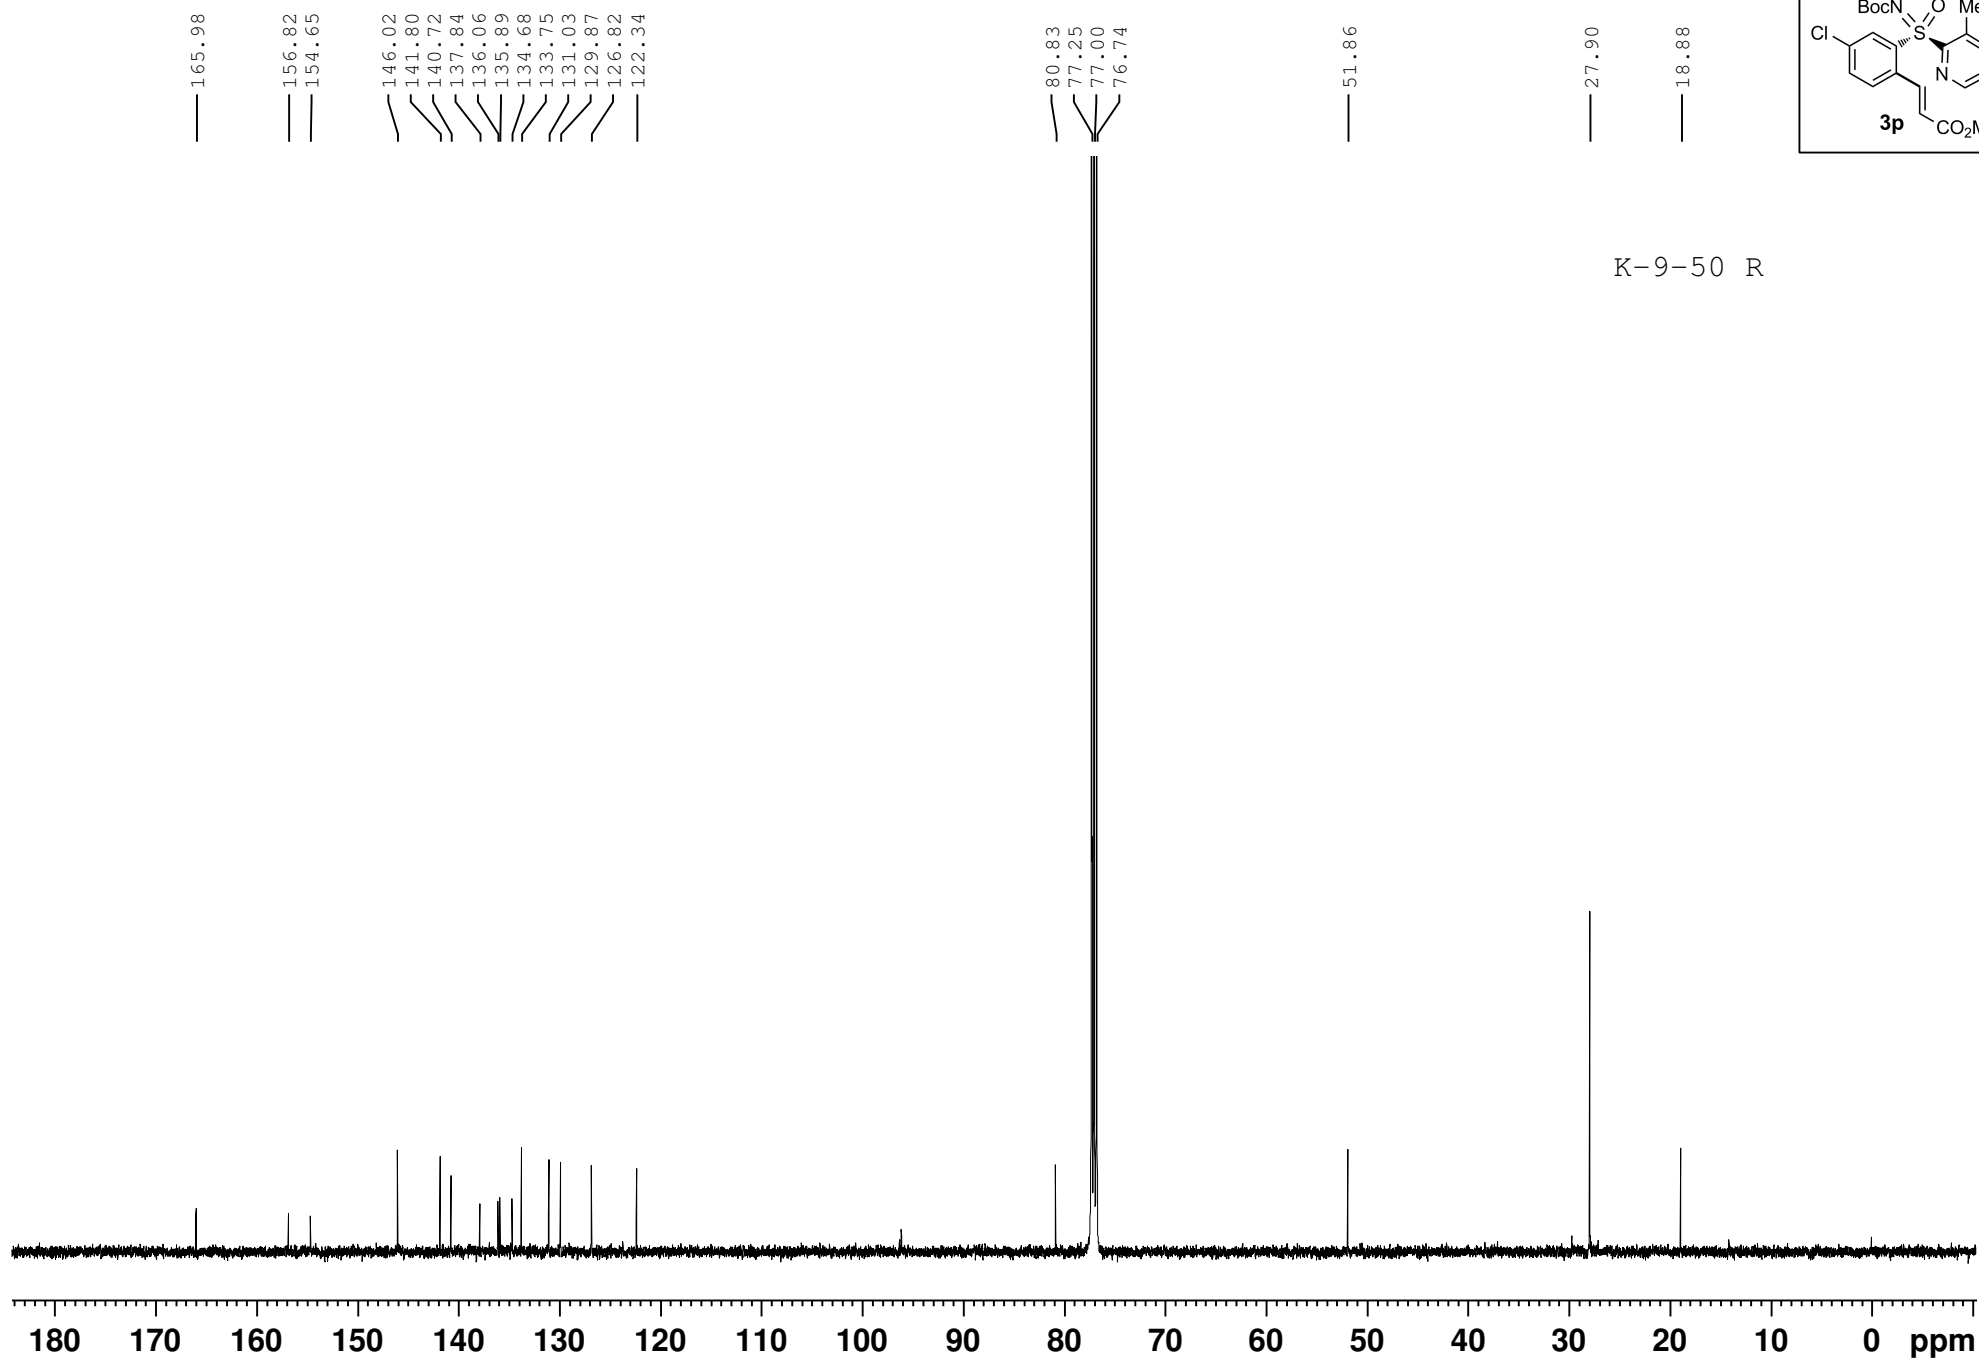



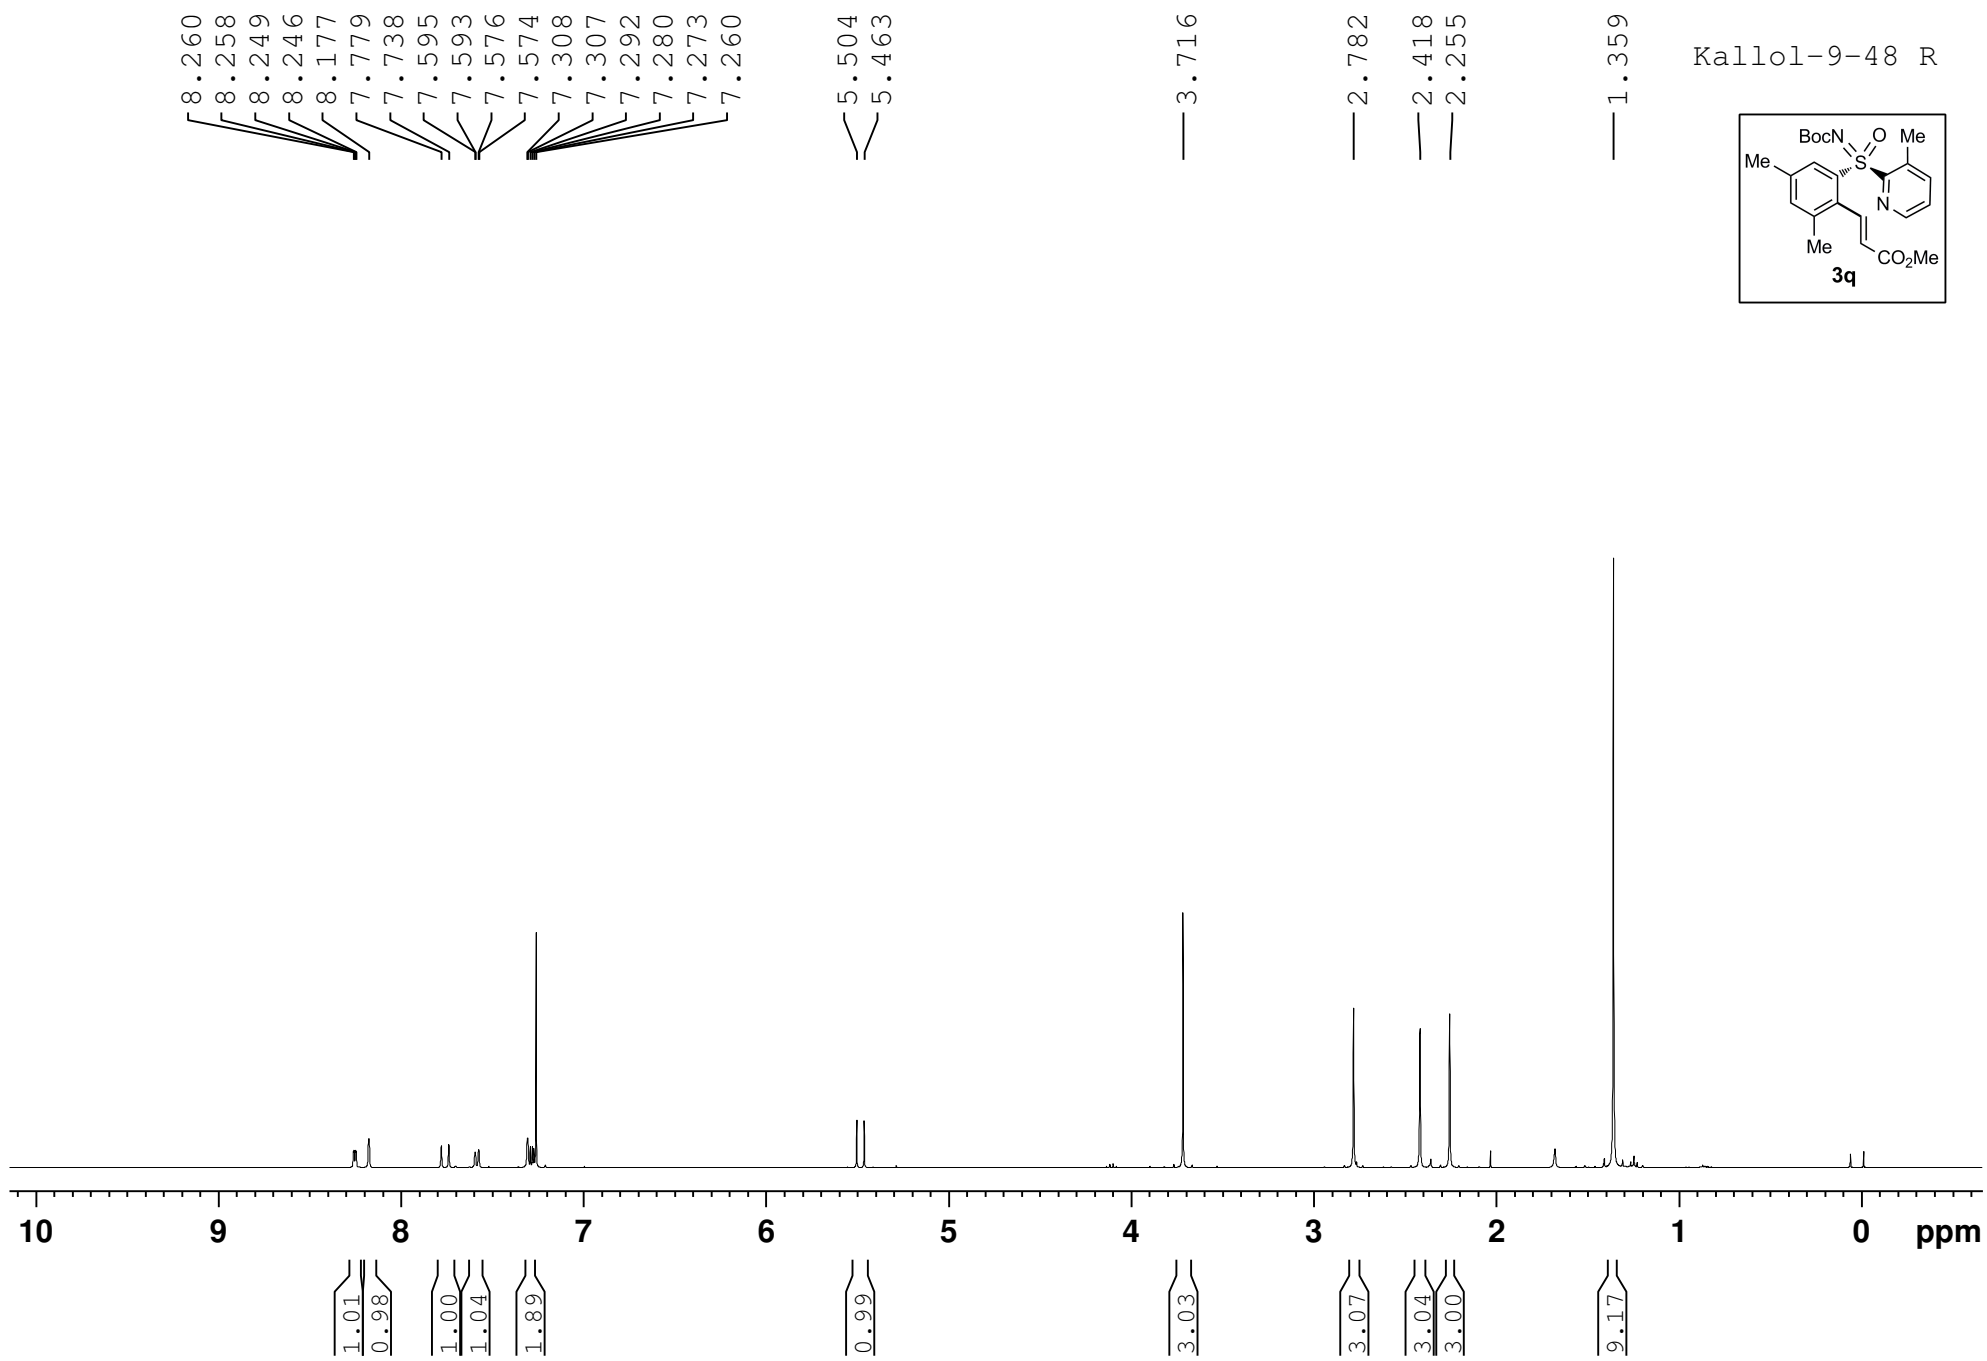

Kallol-9-48 R

165.77  
157.32  
155.28  
146.01  
141.28  
141.23  
138.27  
137.41  
136.70  
136.51  
136.44  
132.48  
128.89  
126.36  
125.08

80.30  
77.32  
77.00  
76.68

51.60

27.95  
21.11  
20.81  
19.07

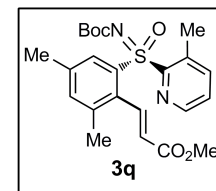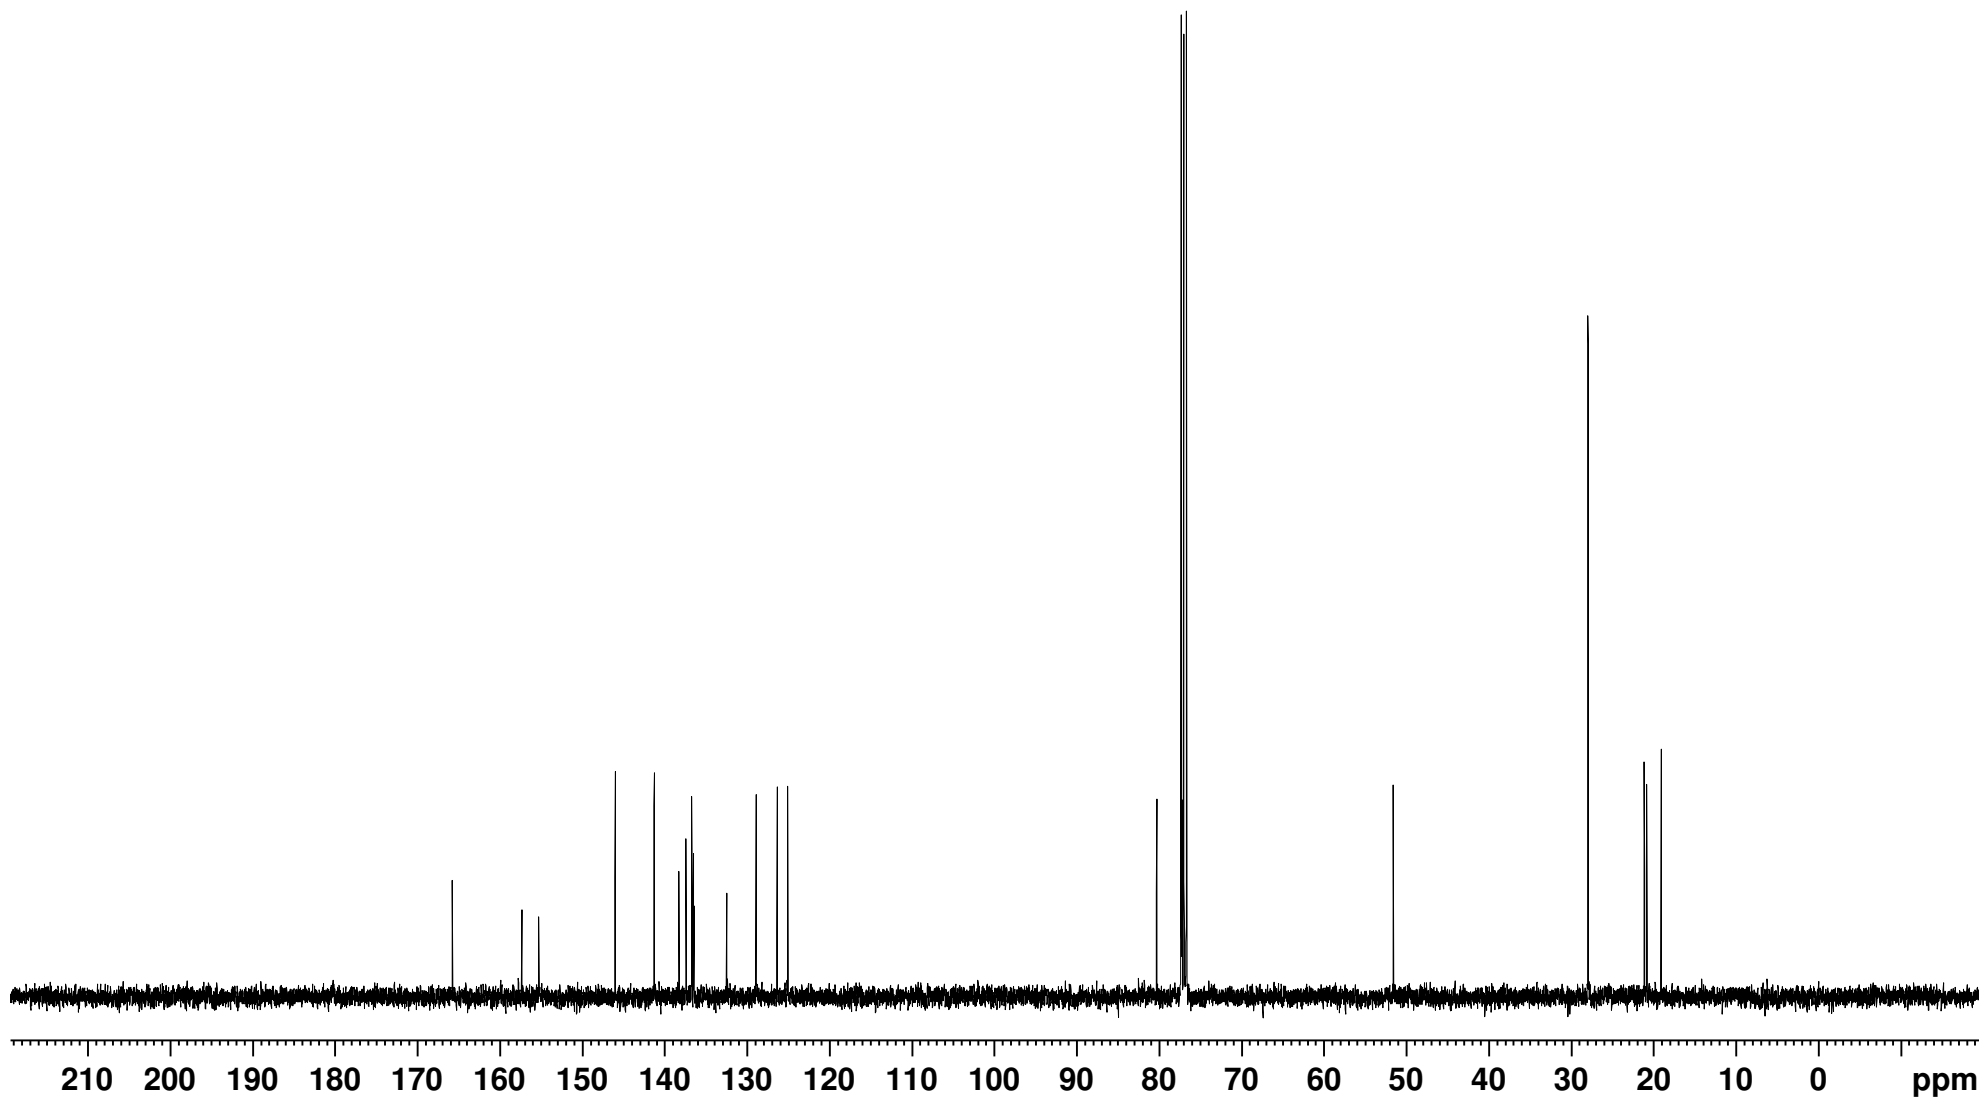

SRS-2-370

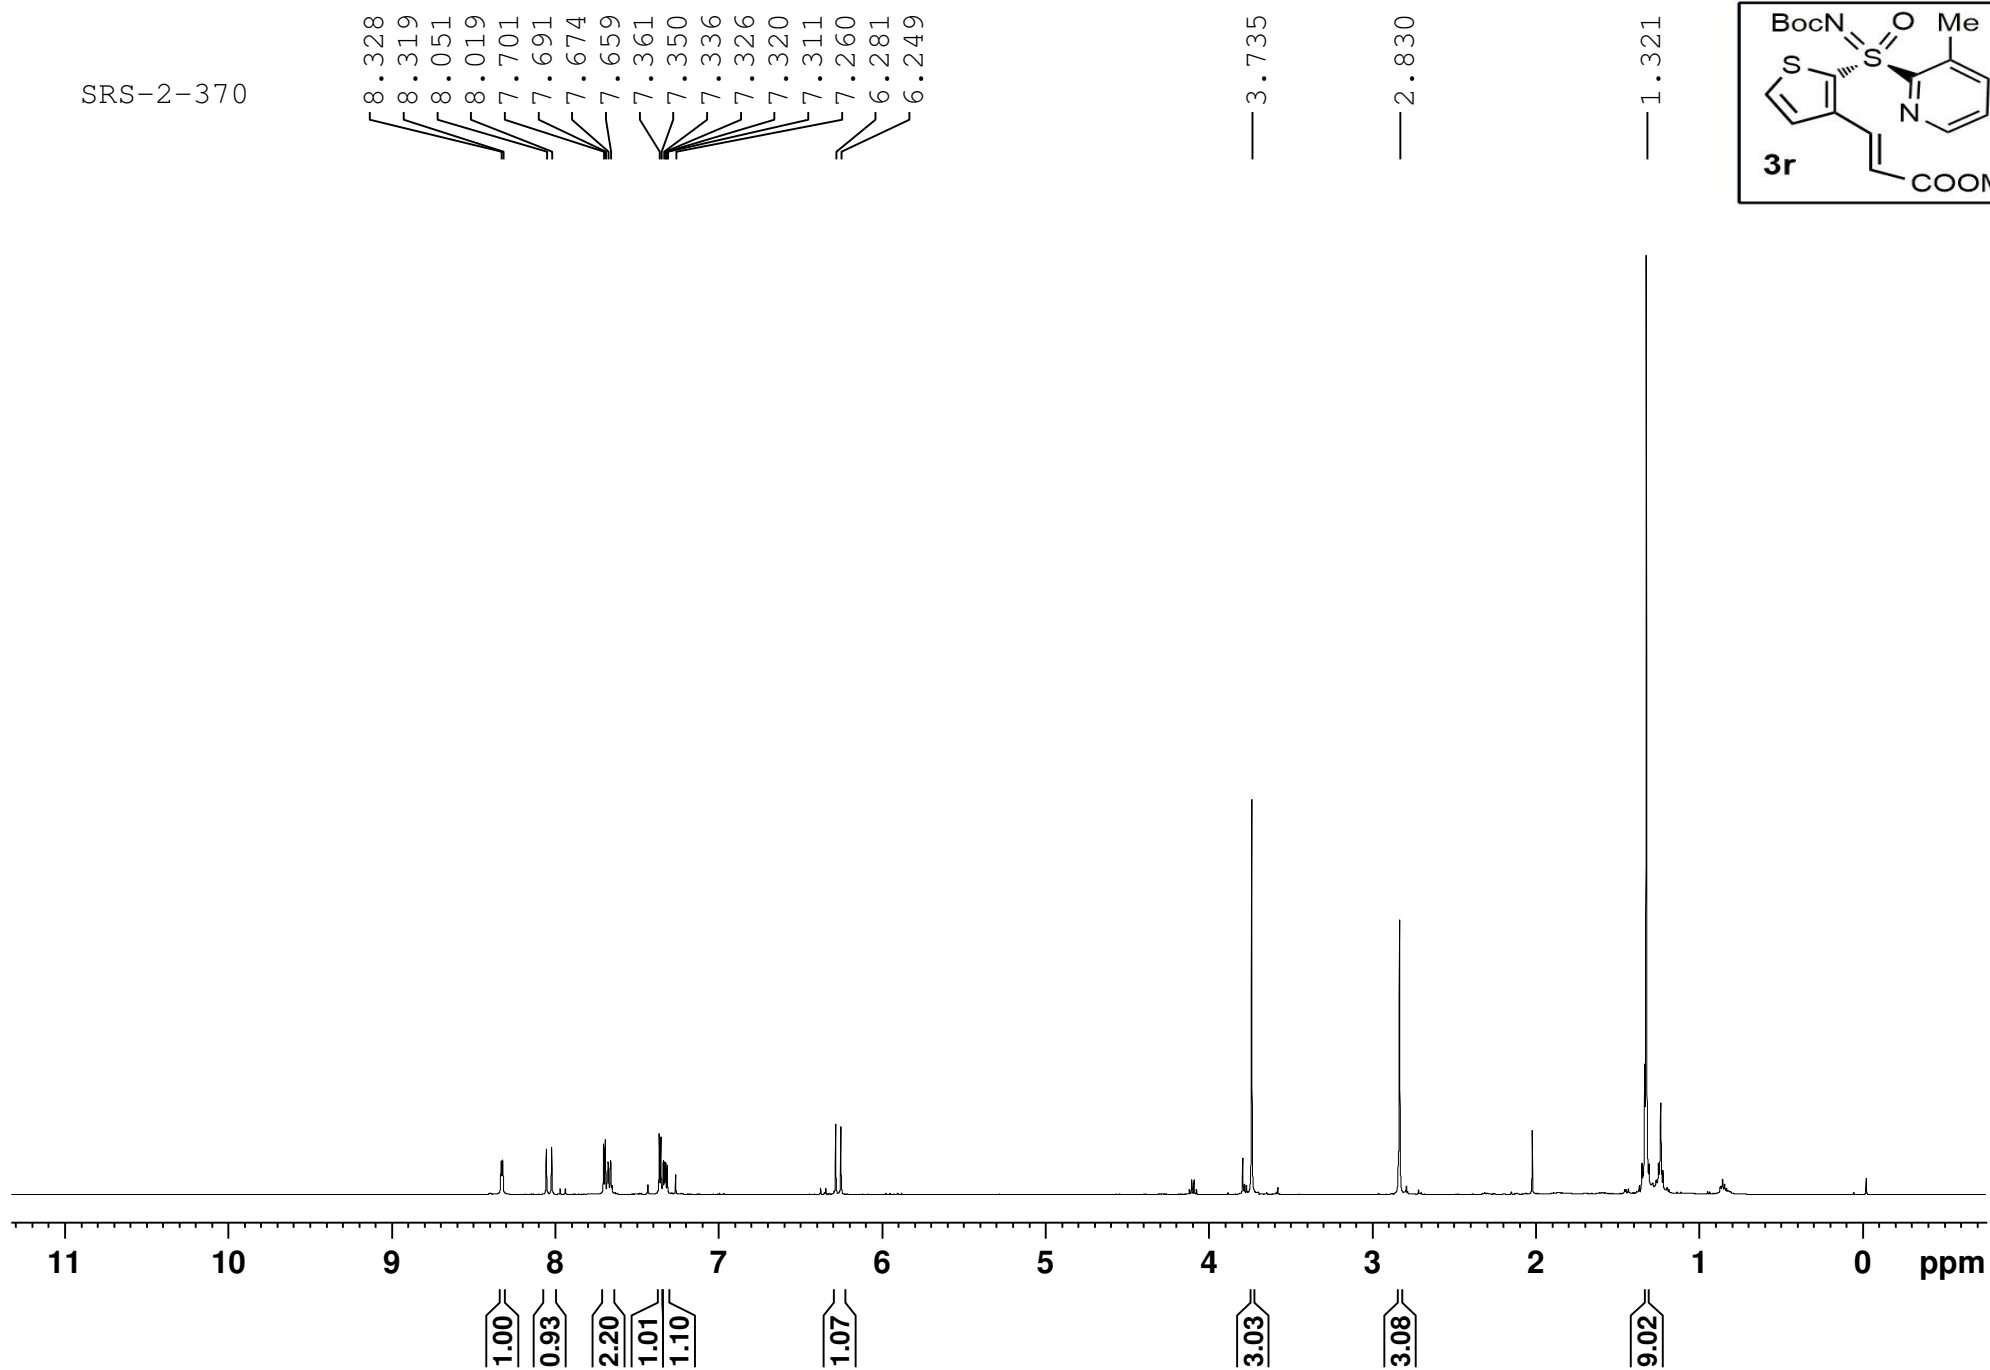

SRS-2-370

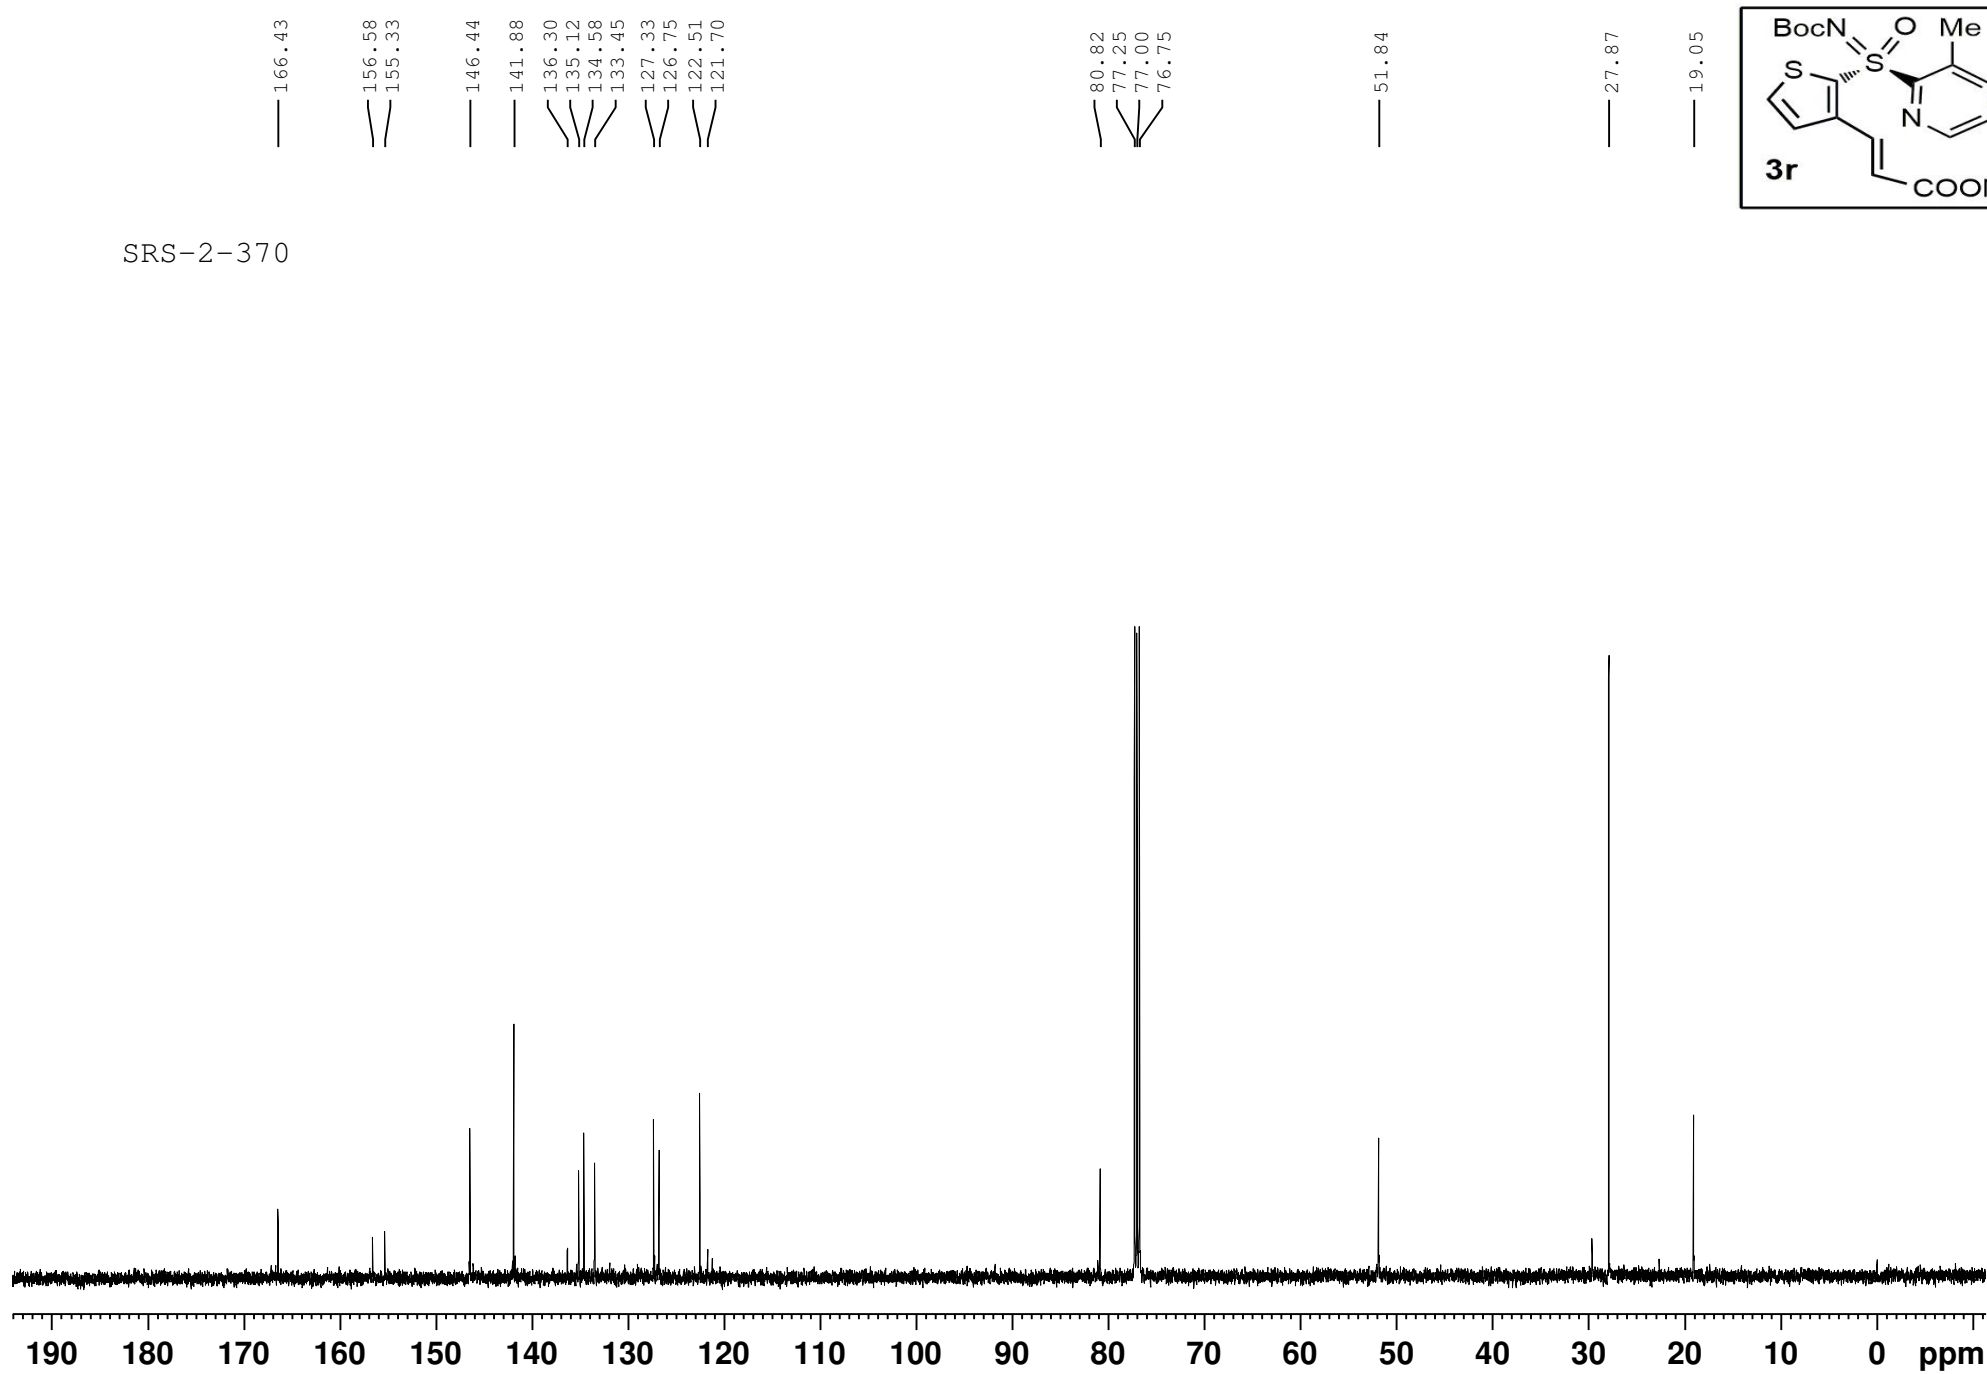

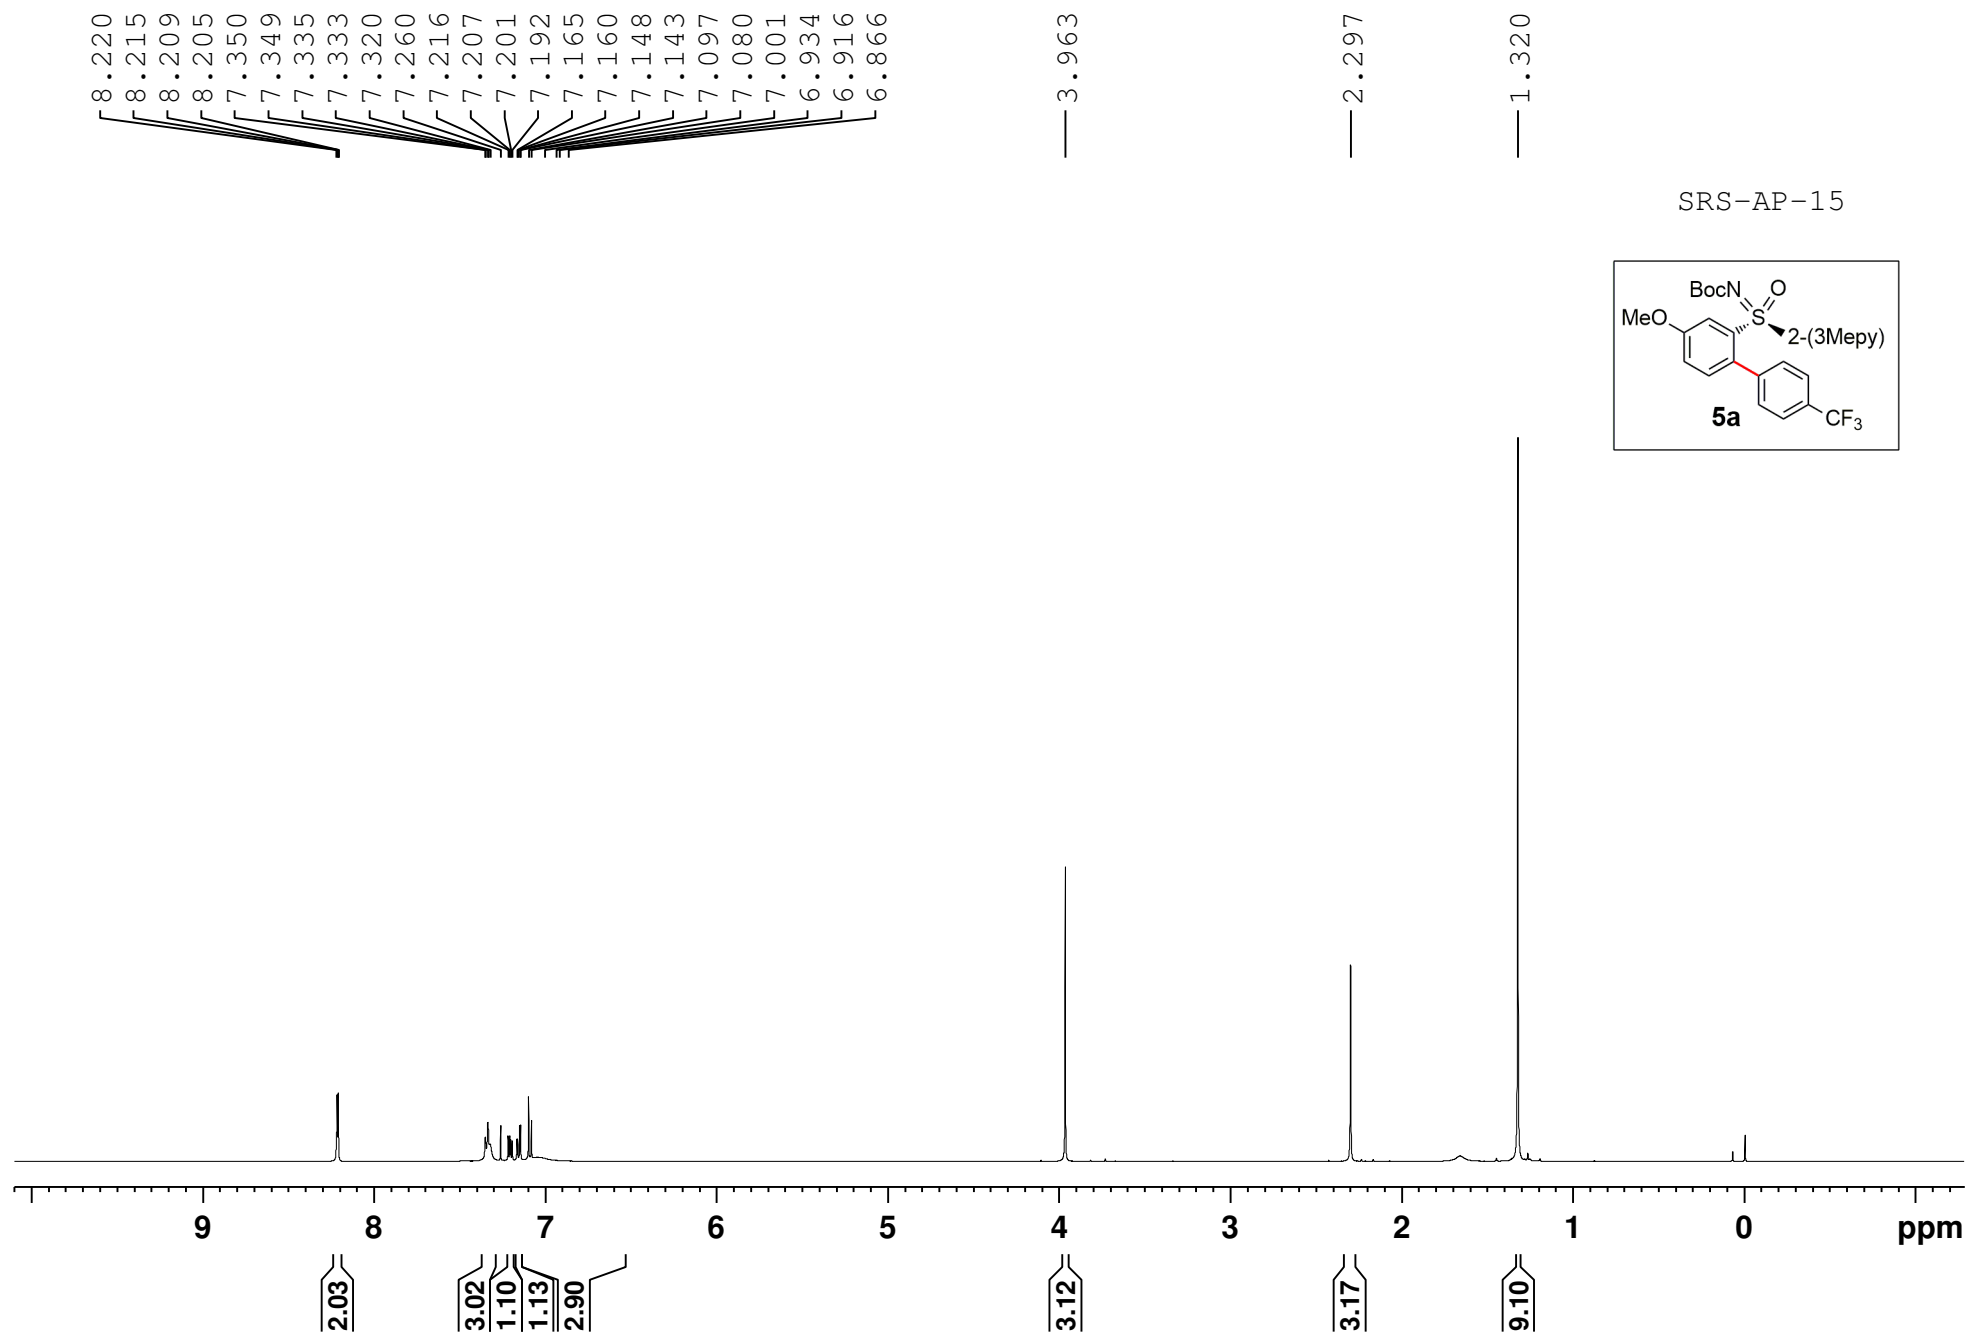

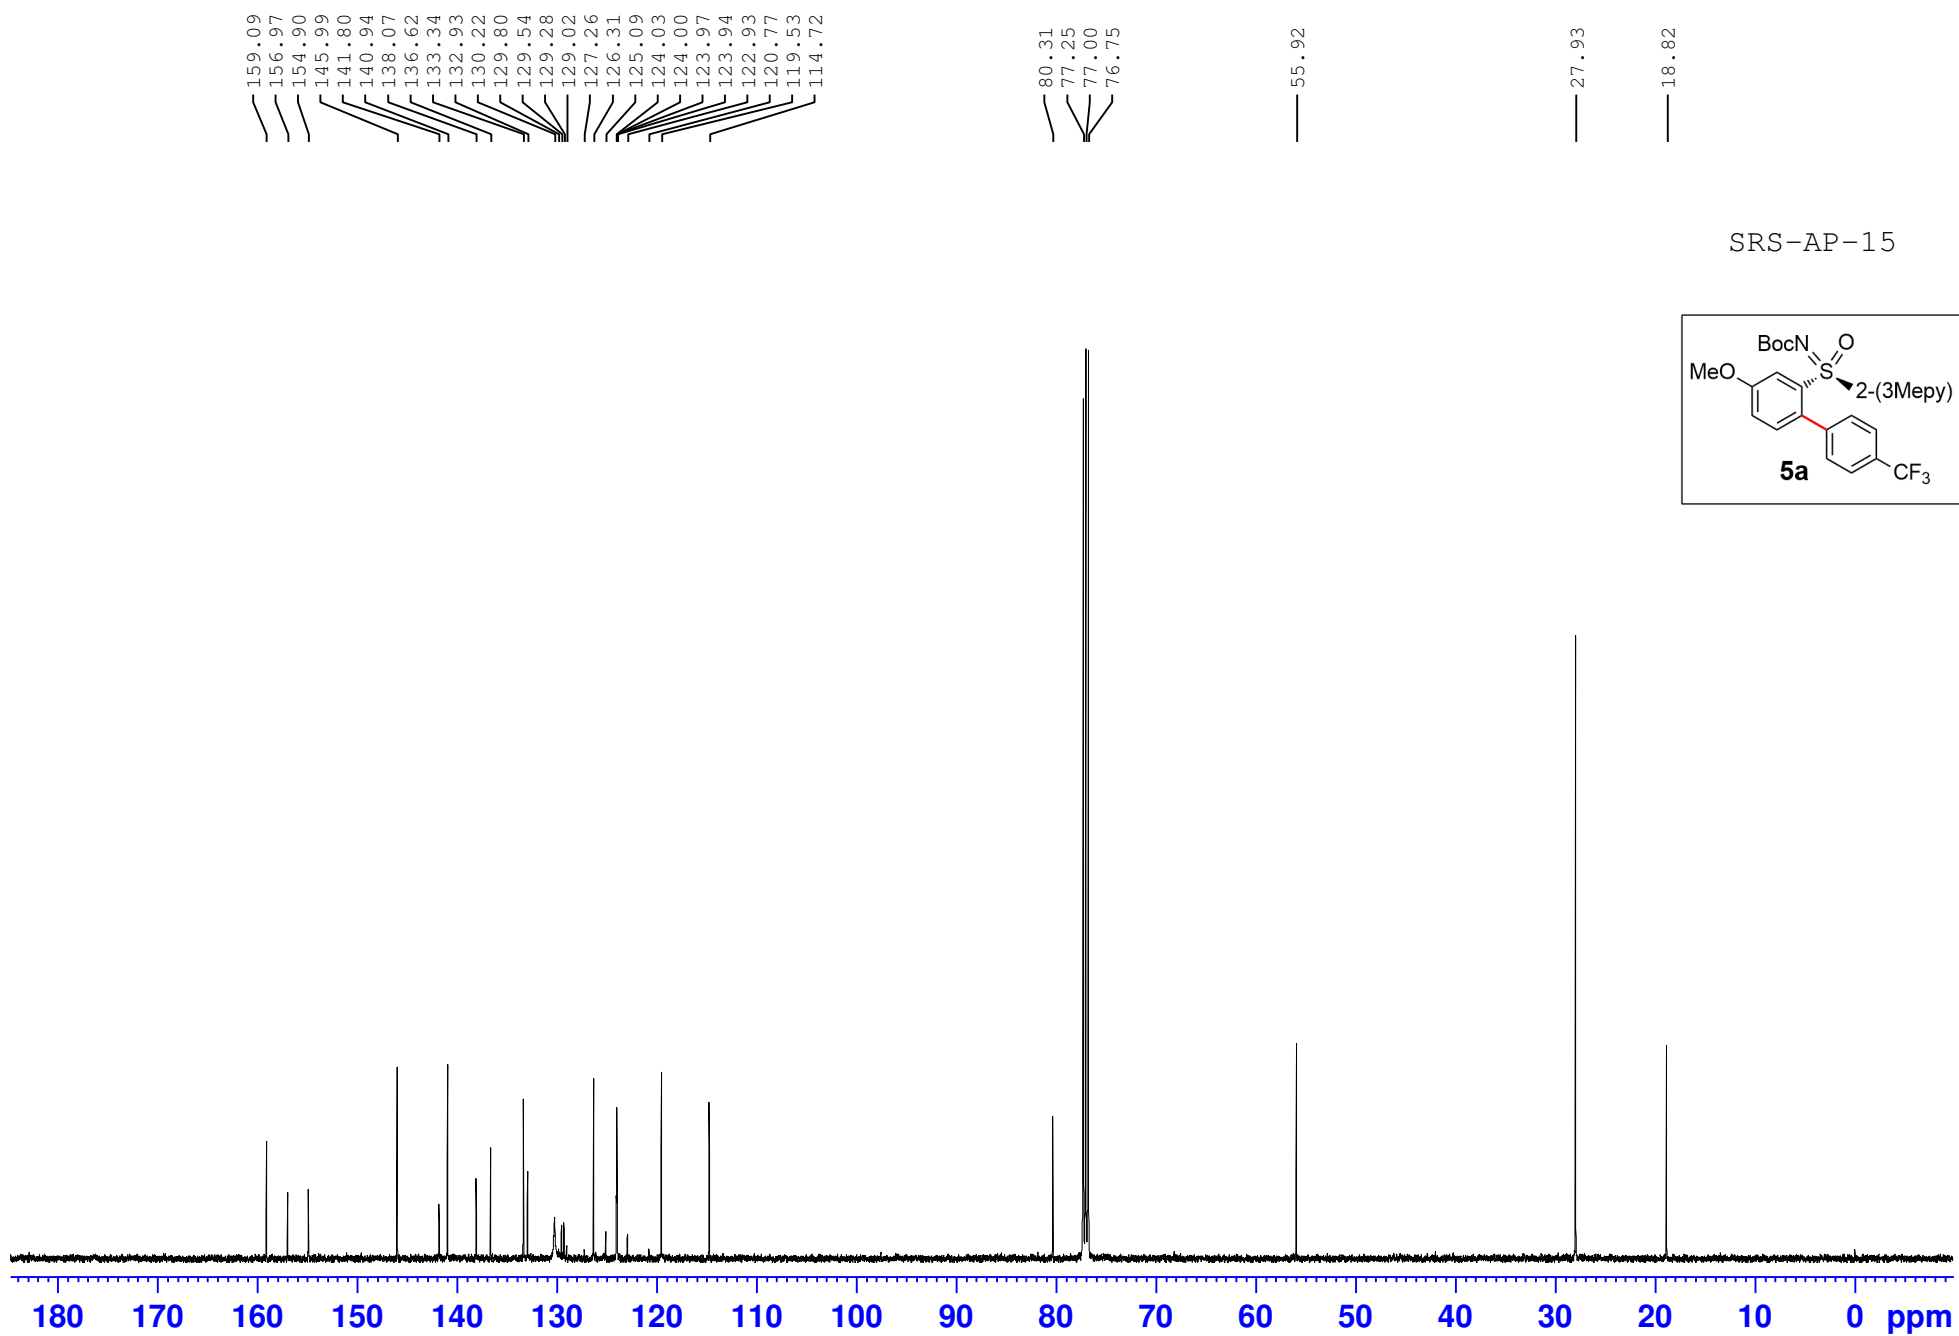

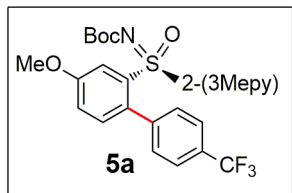

-62.716

SRS-AP-15

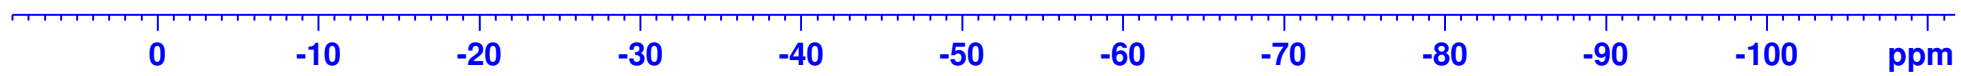

SRS-2-339

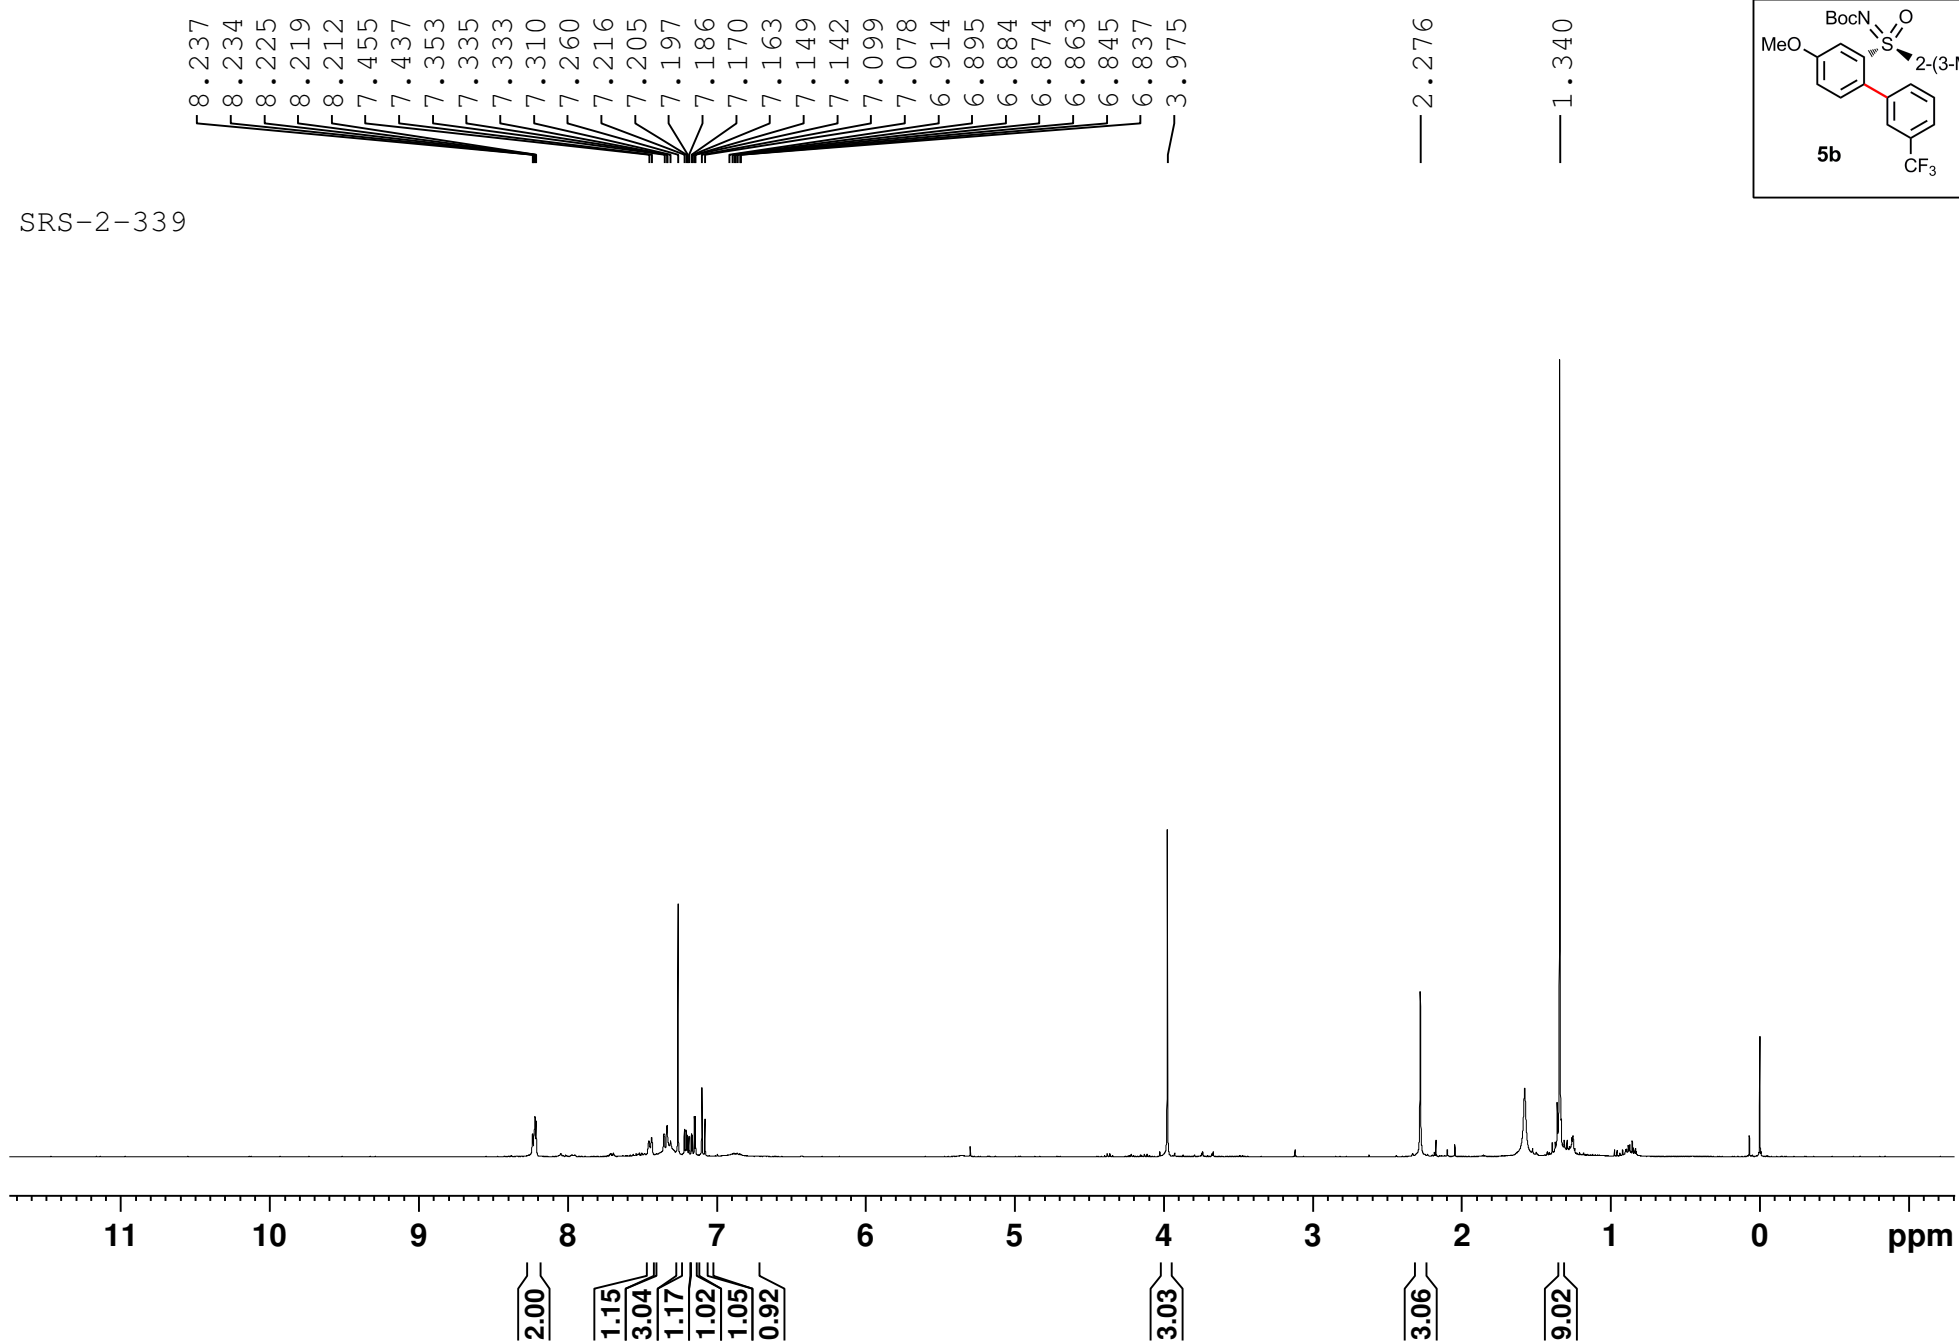



SRS-2-339

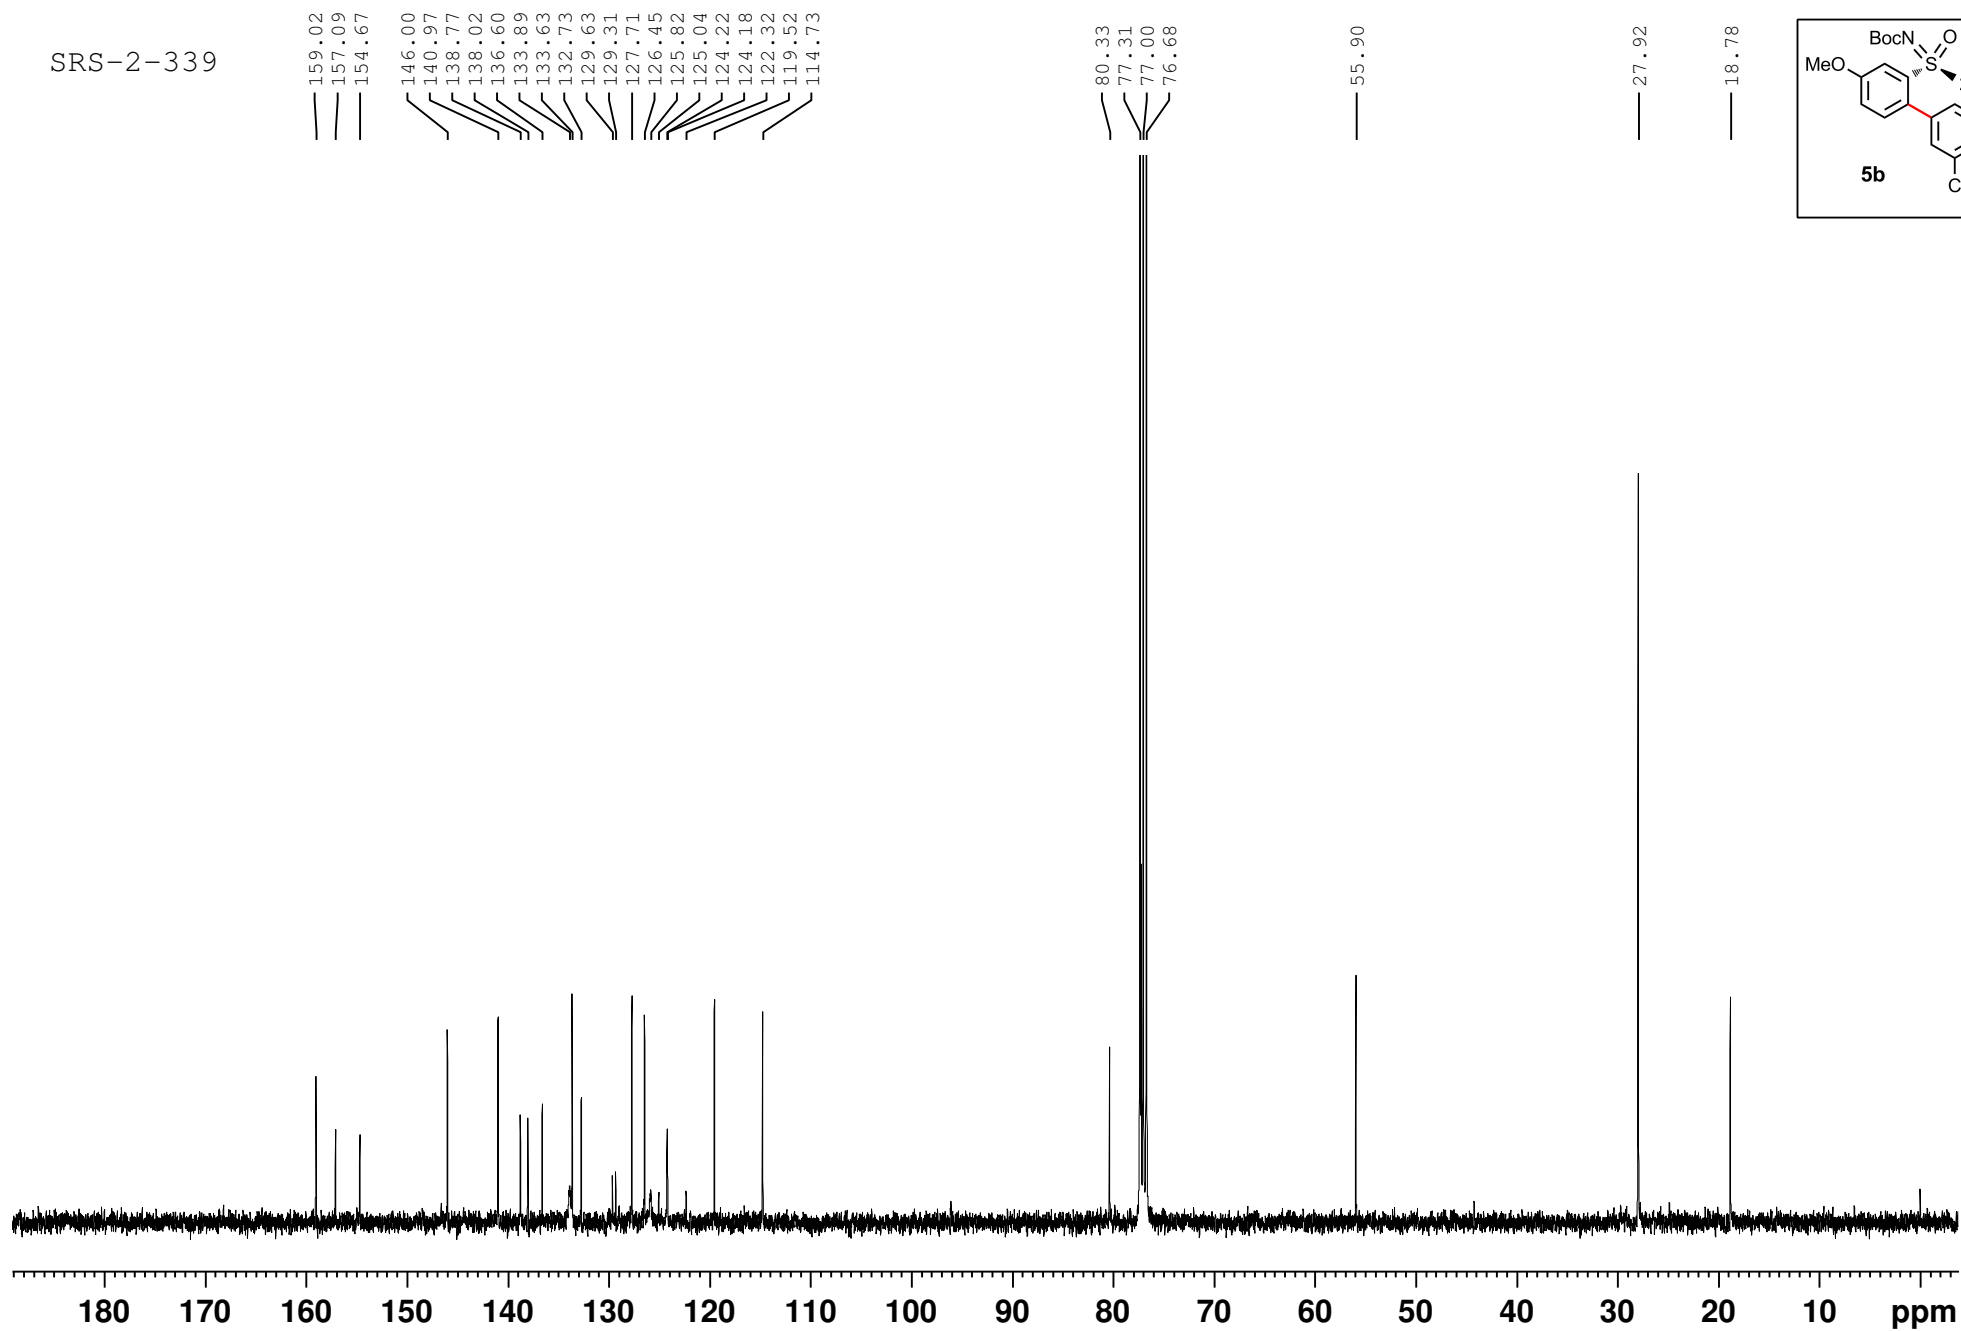

SRS-2-339

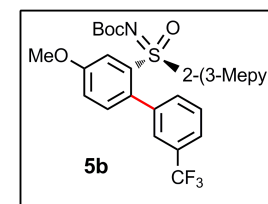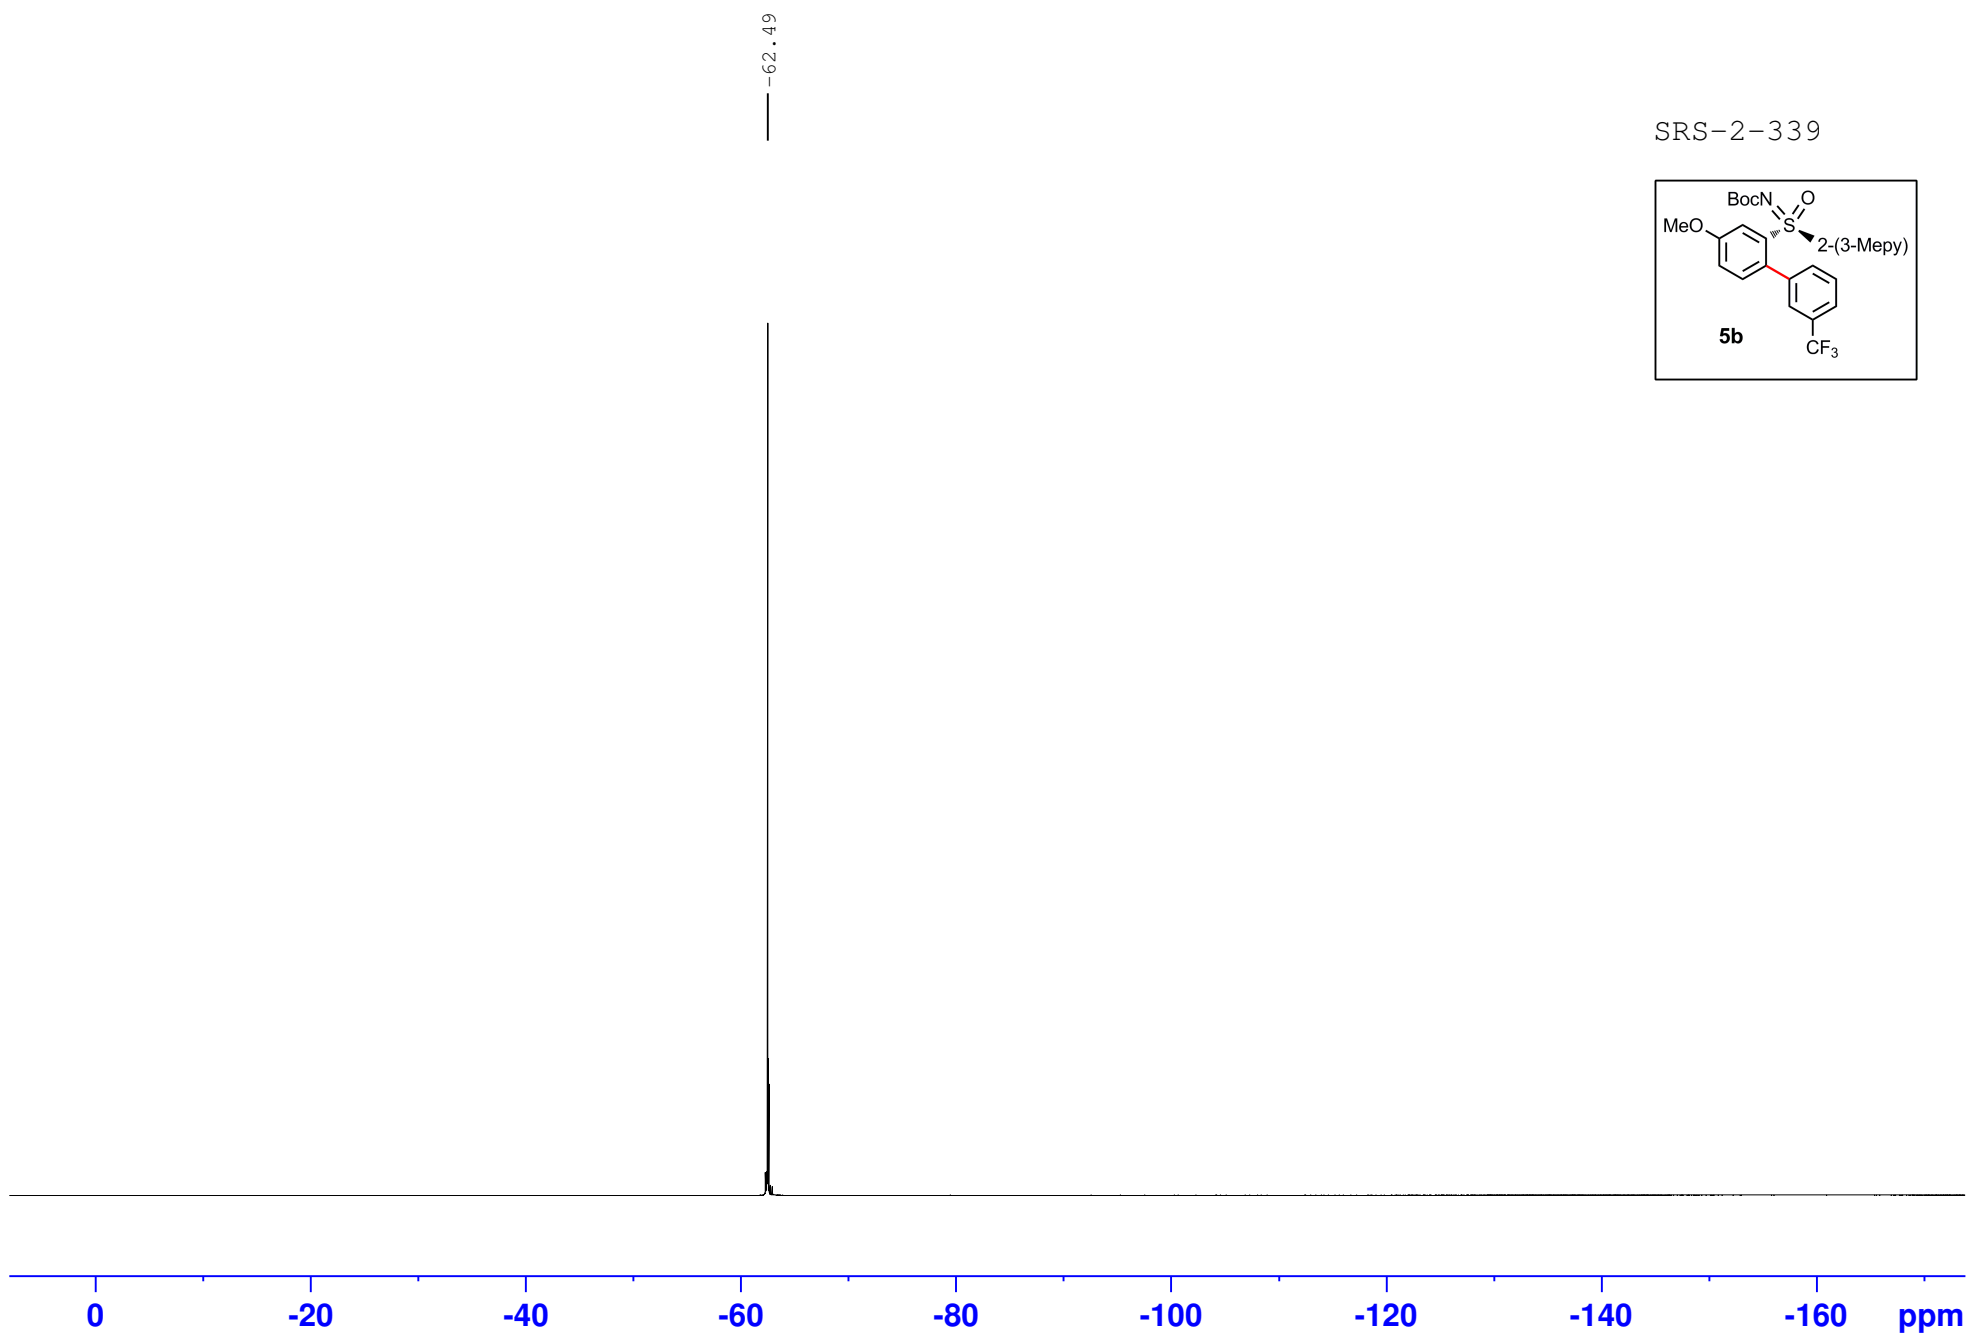

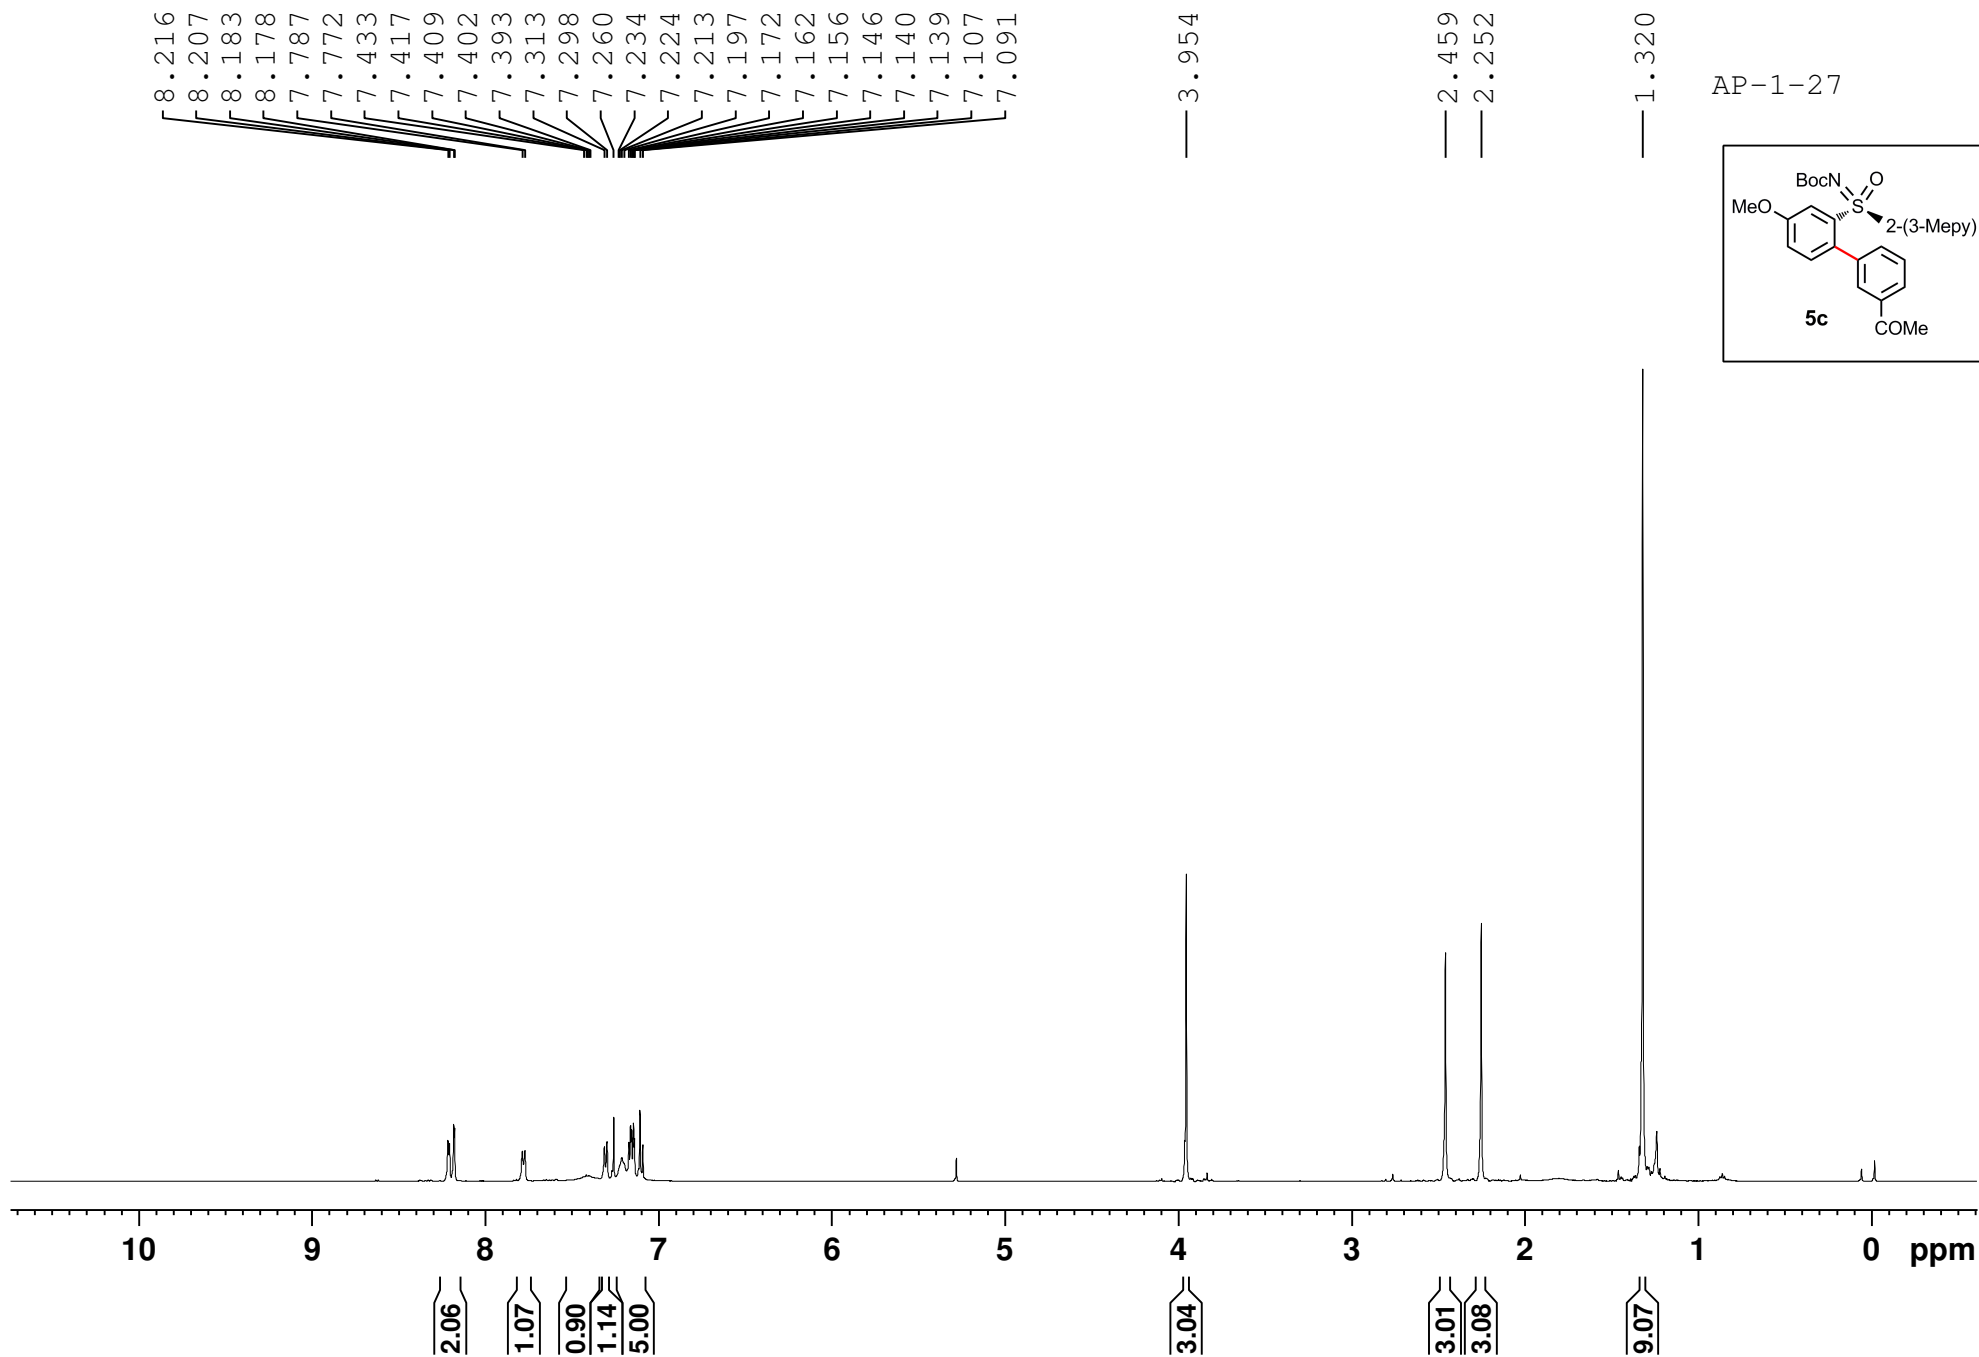

AP-1-27

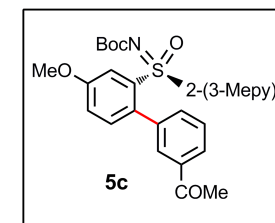

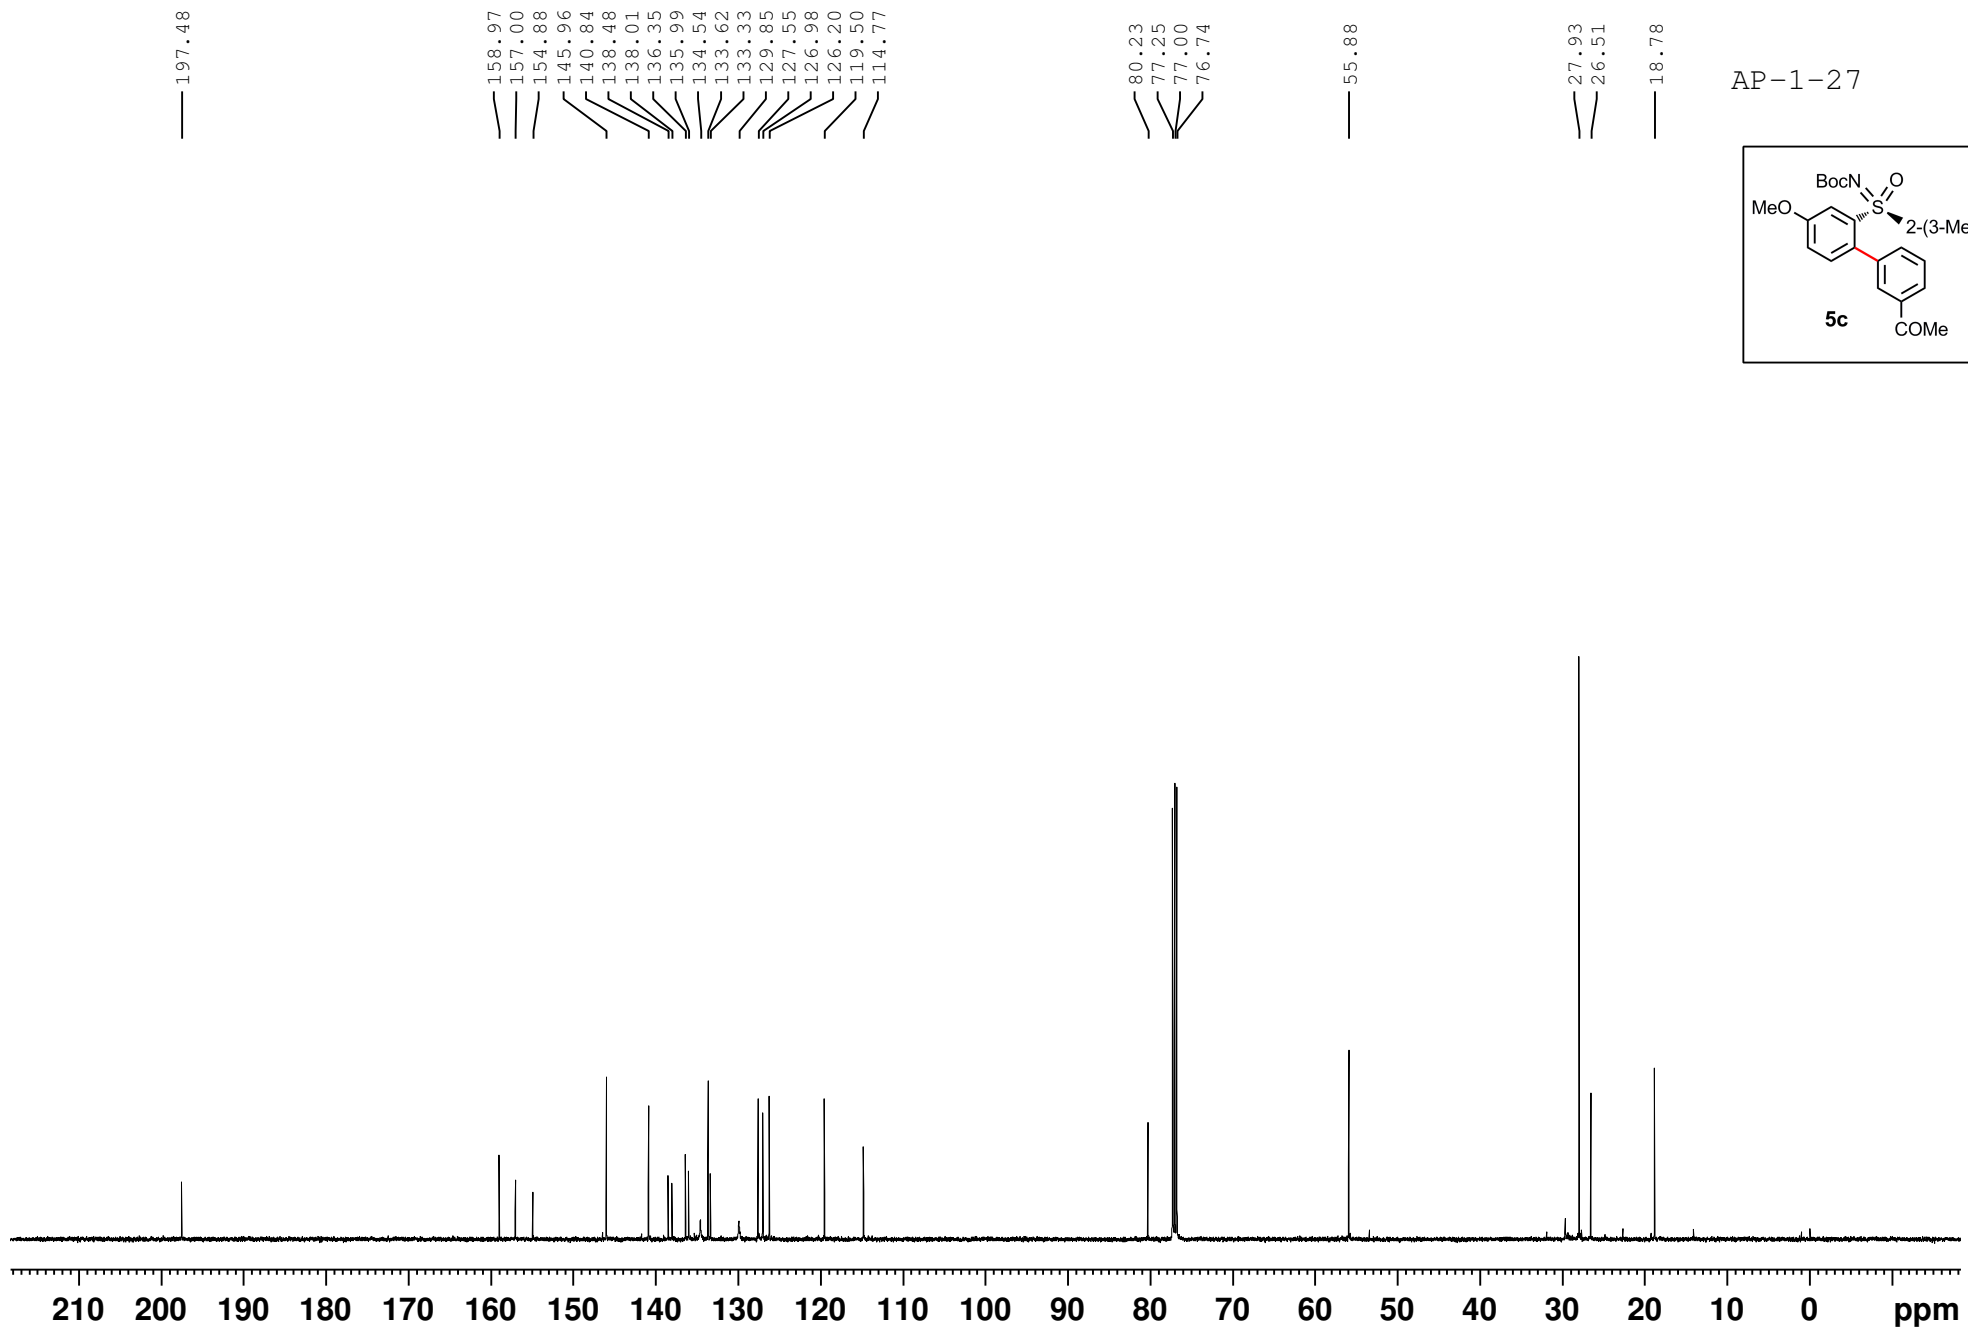



KALLOL- AP-13

— 7.383  
— 7.368

— 7.260

— 7.211  
— 7.202  
— 7.196  
— 7.187

— 7.130  
— 7.124  
— 7.113  
— 7.108

— 7.070  
— 7.054

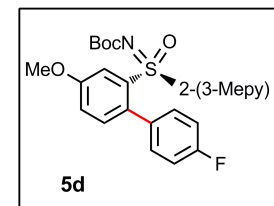

— 8.229  
— 8.226  
— 8.220  
— 8.218

— 8.199  
— 8.193

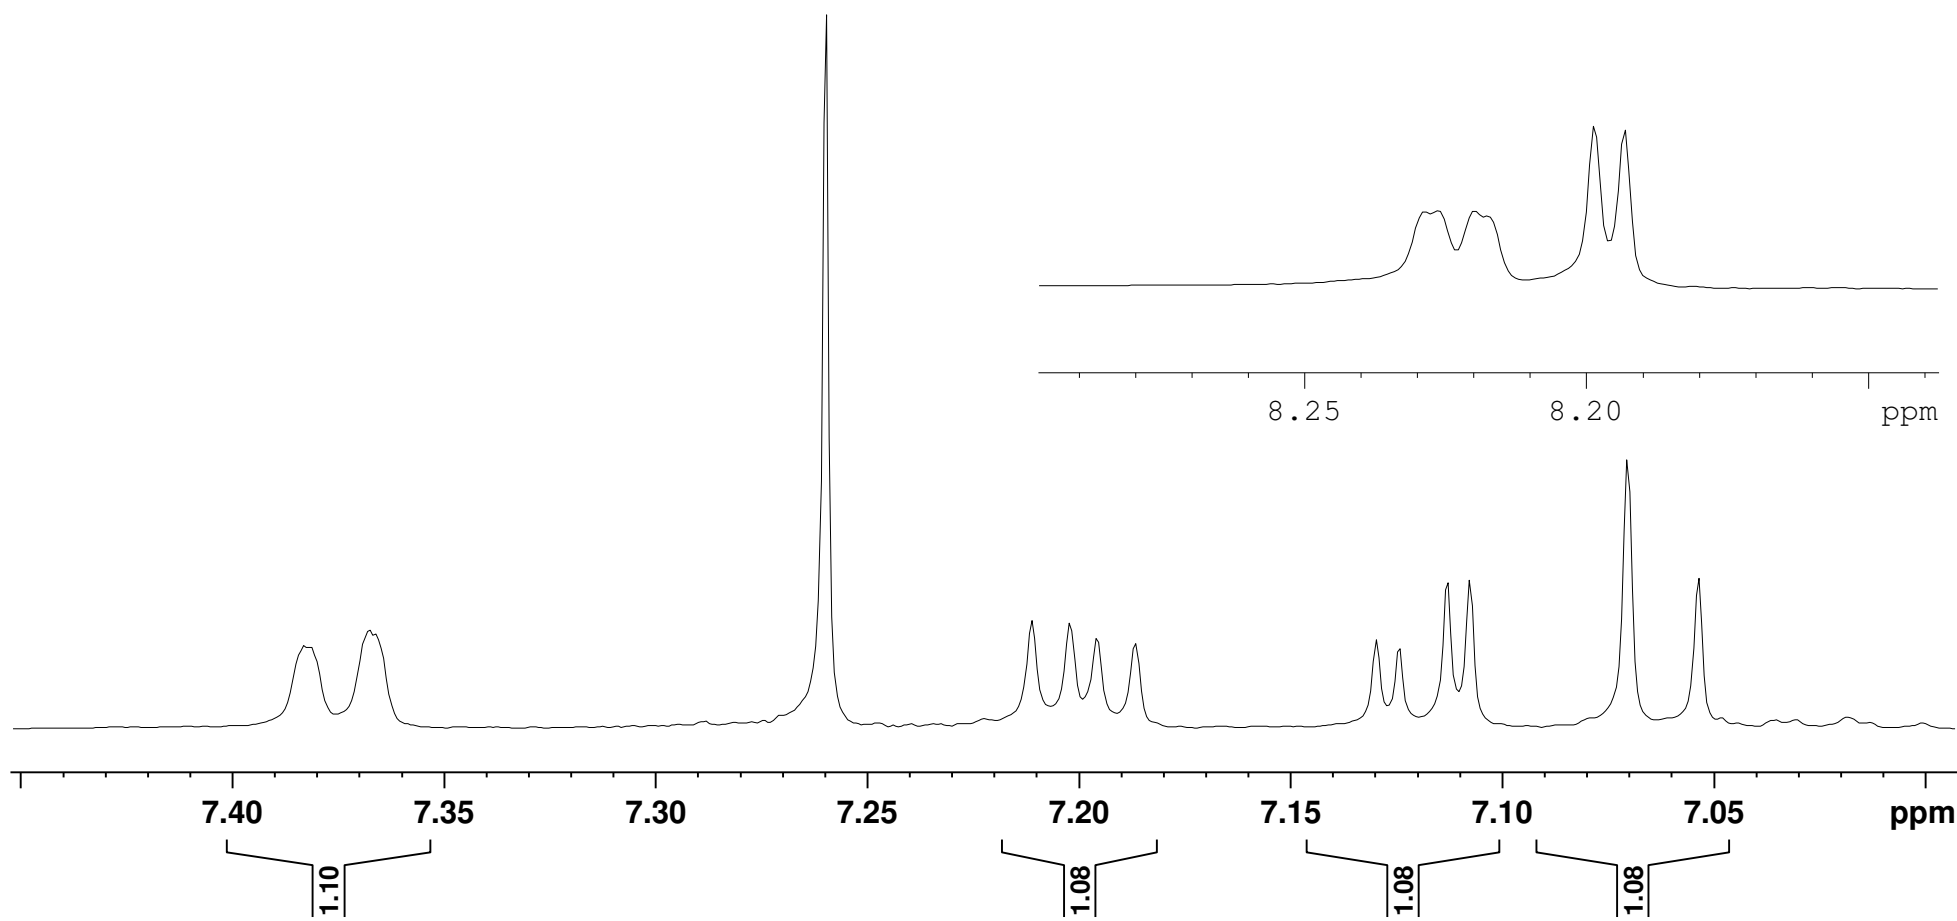

KALLOL- AP-13

163.05  
161.08  
158.77  
157.01  
155.04

145.91  
140.86  
138.09  
136.60  
133.96  
133.91  
133.50  
131.52  
126.19

119.48  
114.61  
114.11  
113.94

80.22  
77.25  
77.00  
76.74

55.85

27.94

18.86

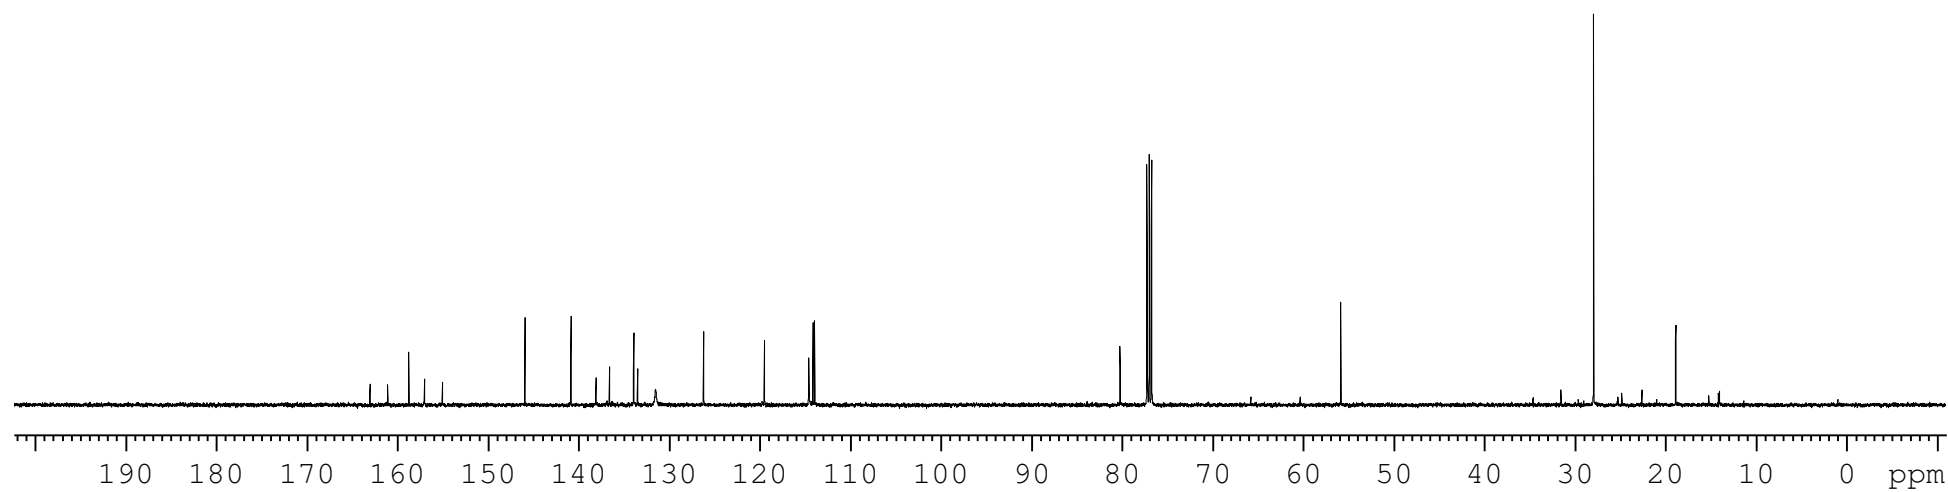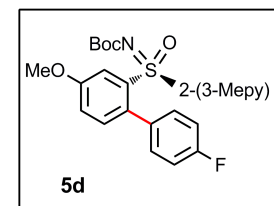

K-S-2-364

-114.76

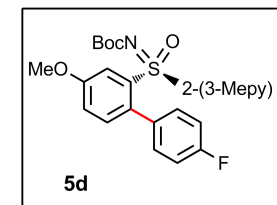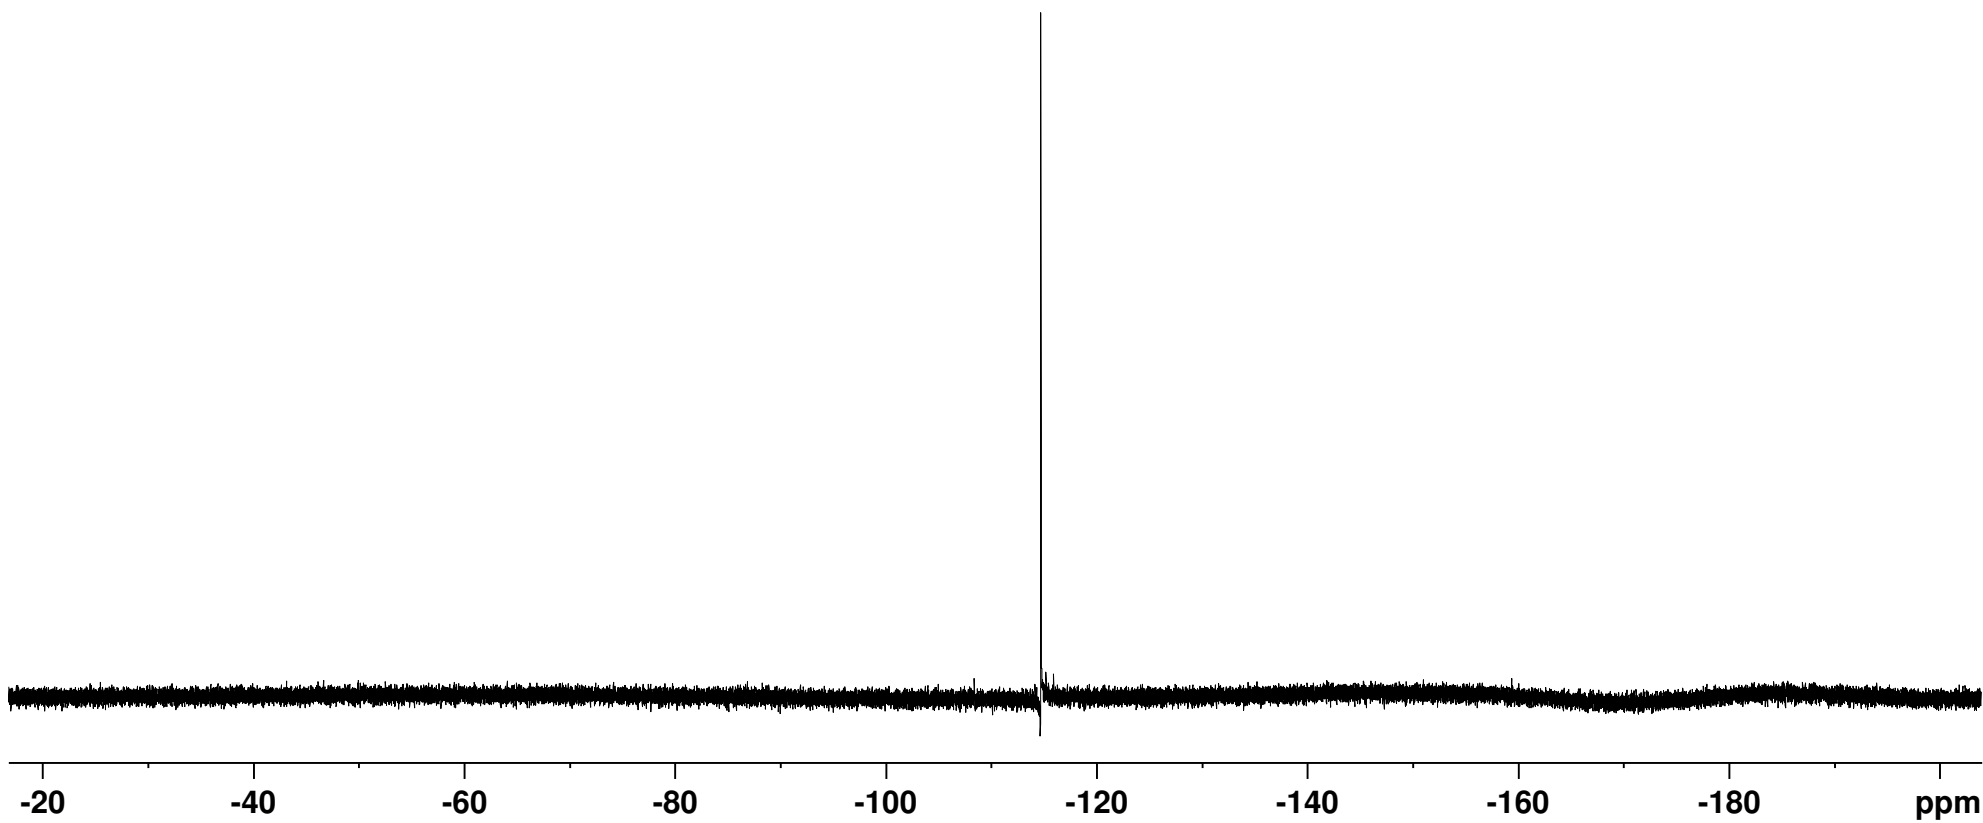



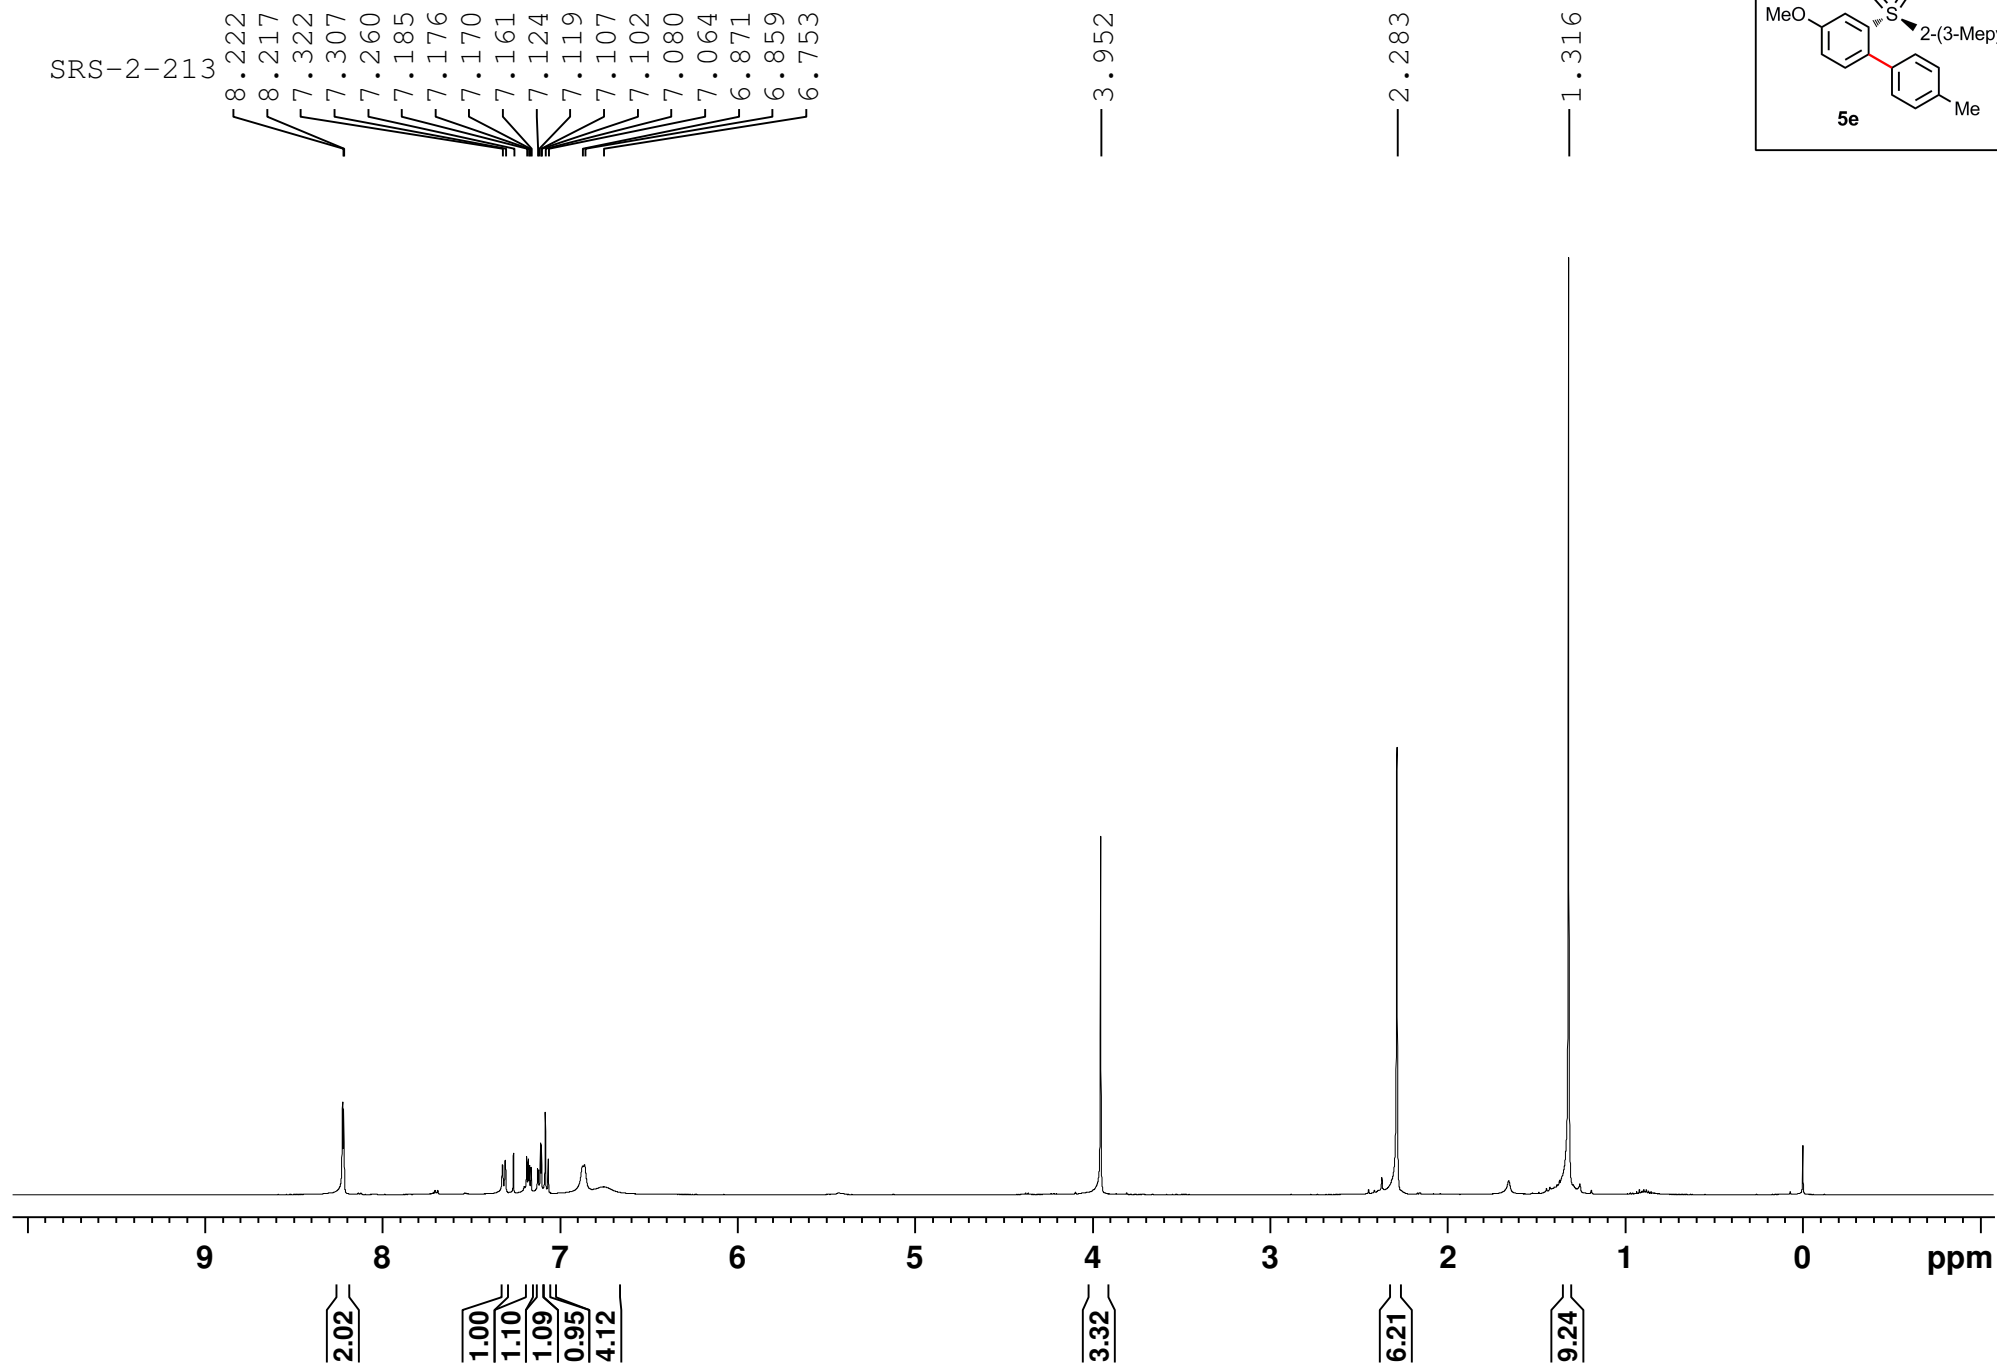

SRS-2-213

158.46  
157.13  
155.08  
145.87  
140.65  
138.00  
136.87  
136.80  
135.06  
134.72  
133.91  
129.57  
127.82  
126.02  
119.55  
114.23

80.08  
77.32  
77.00  
76.68

55.85

27.94  
21.08  
18.90

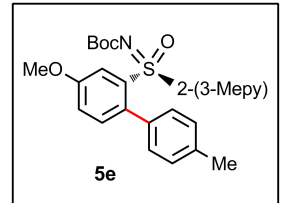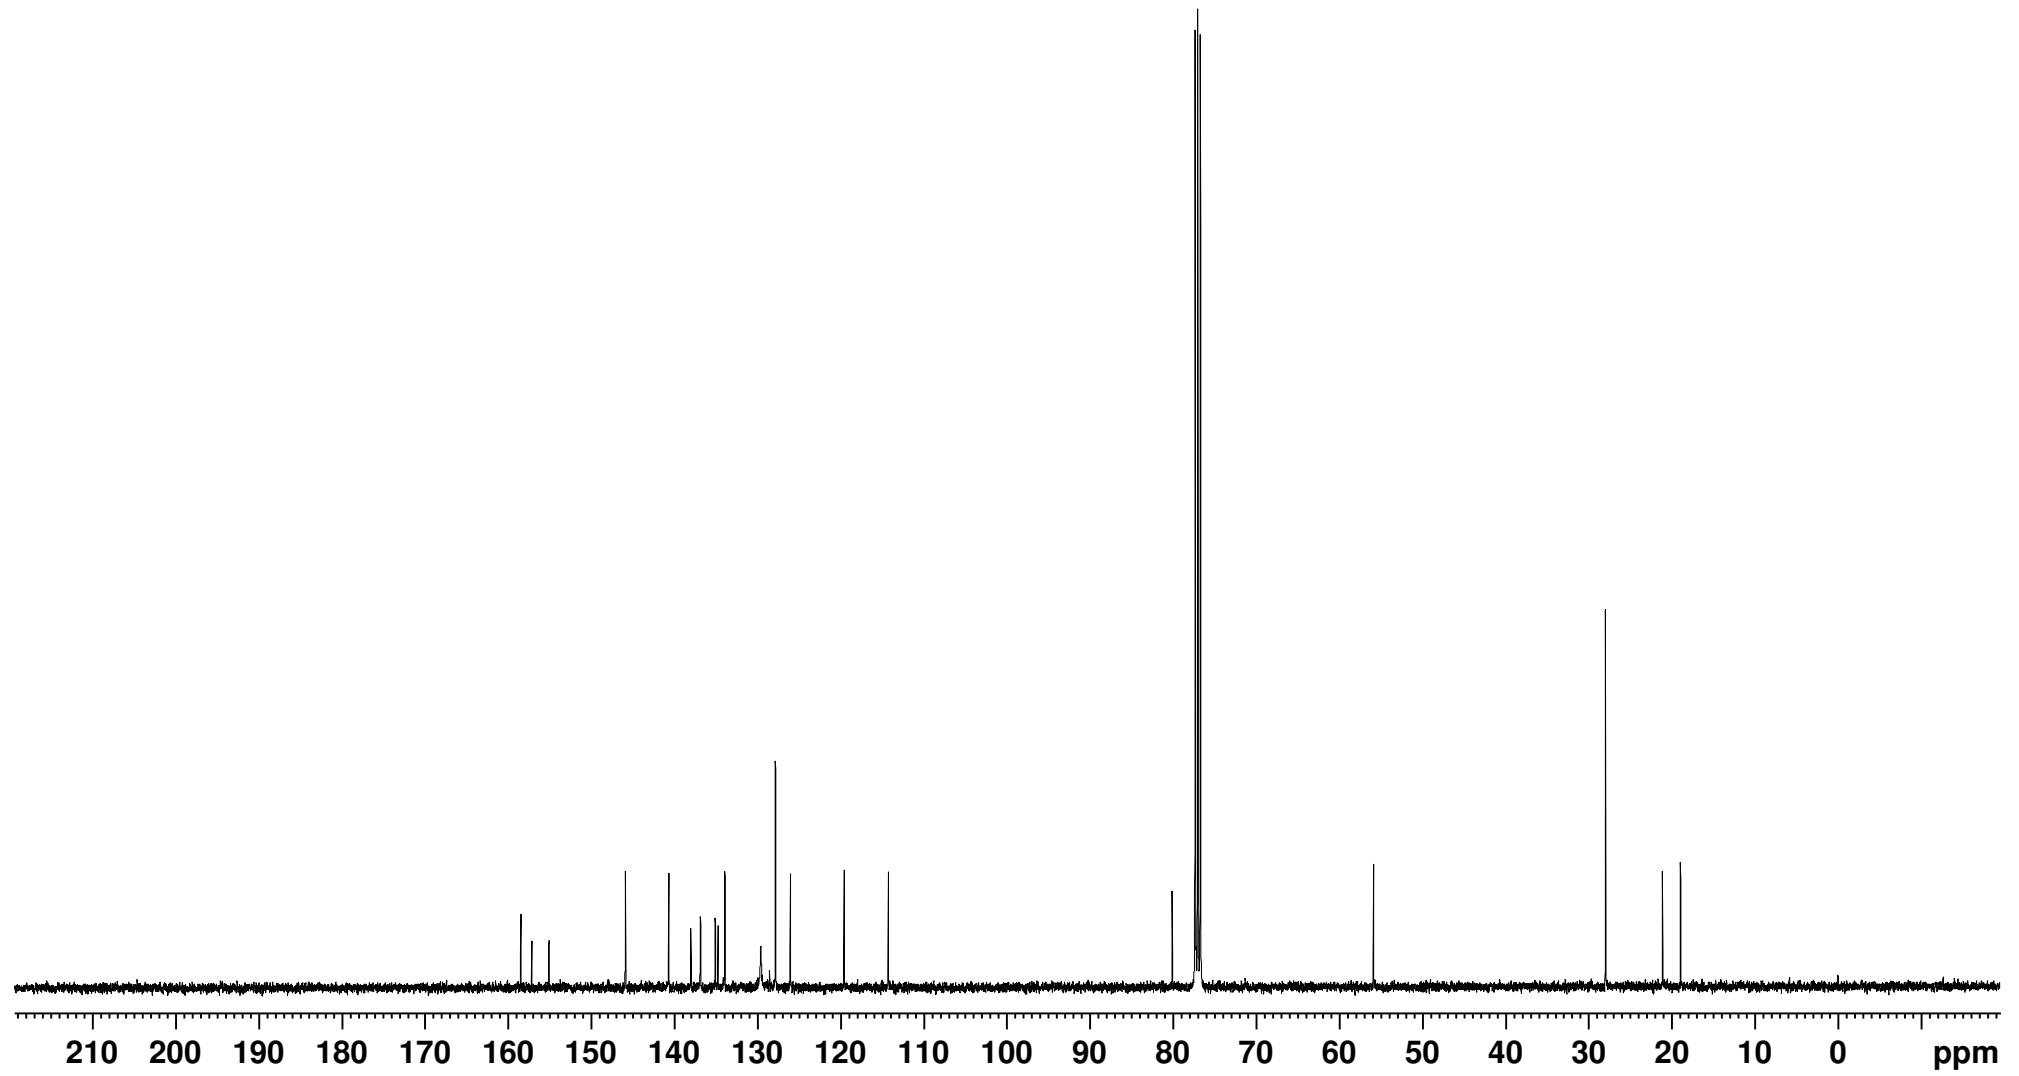

KALLOL- AP-19

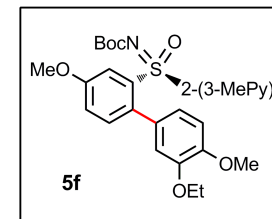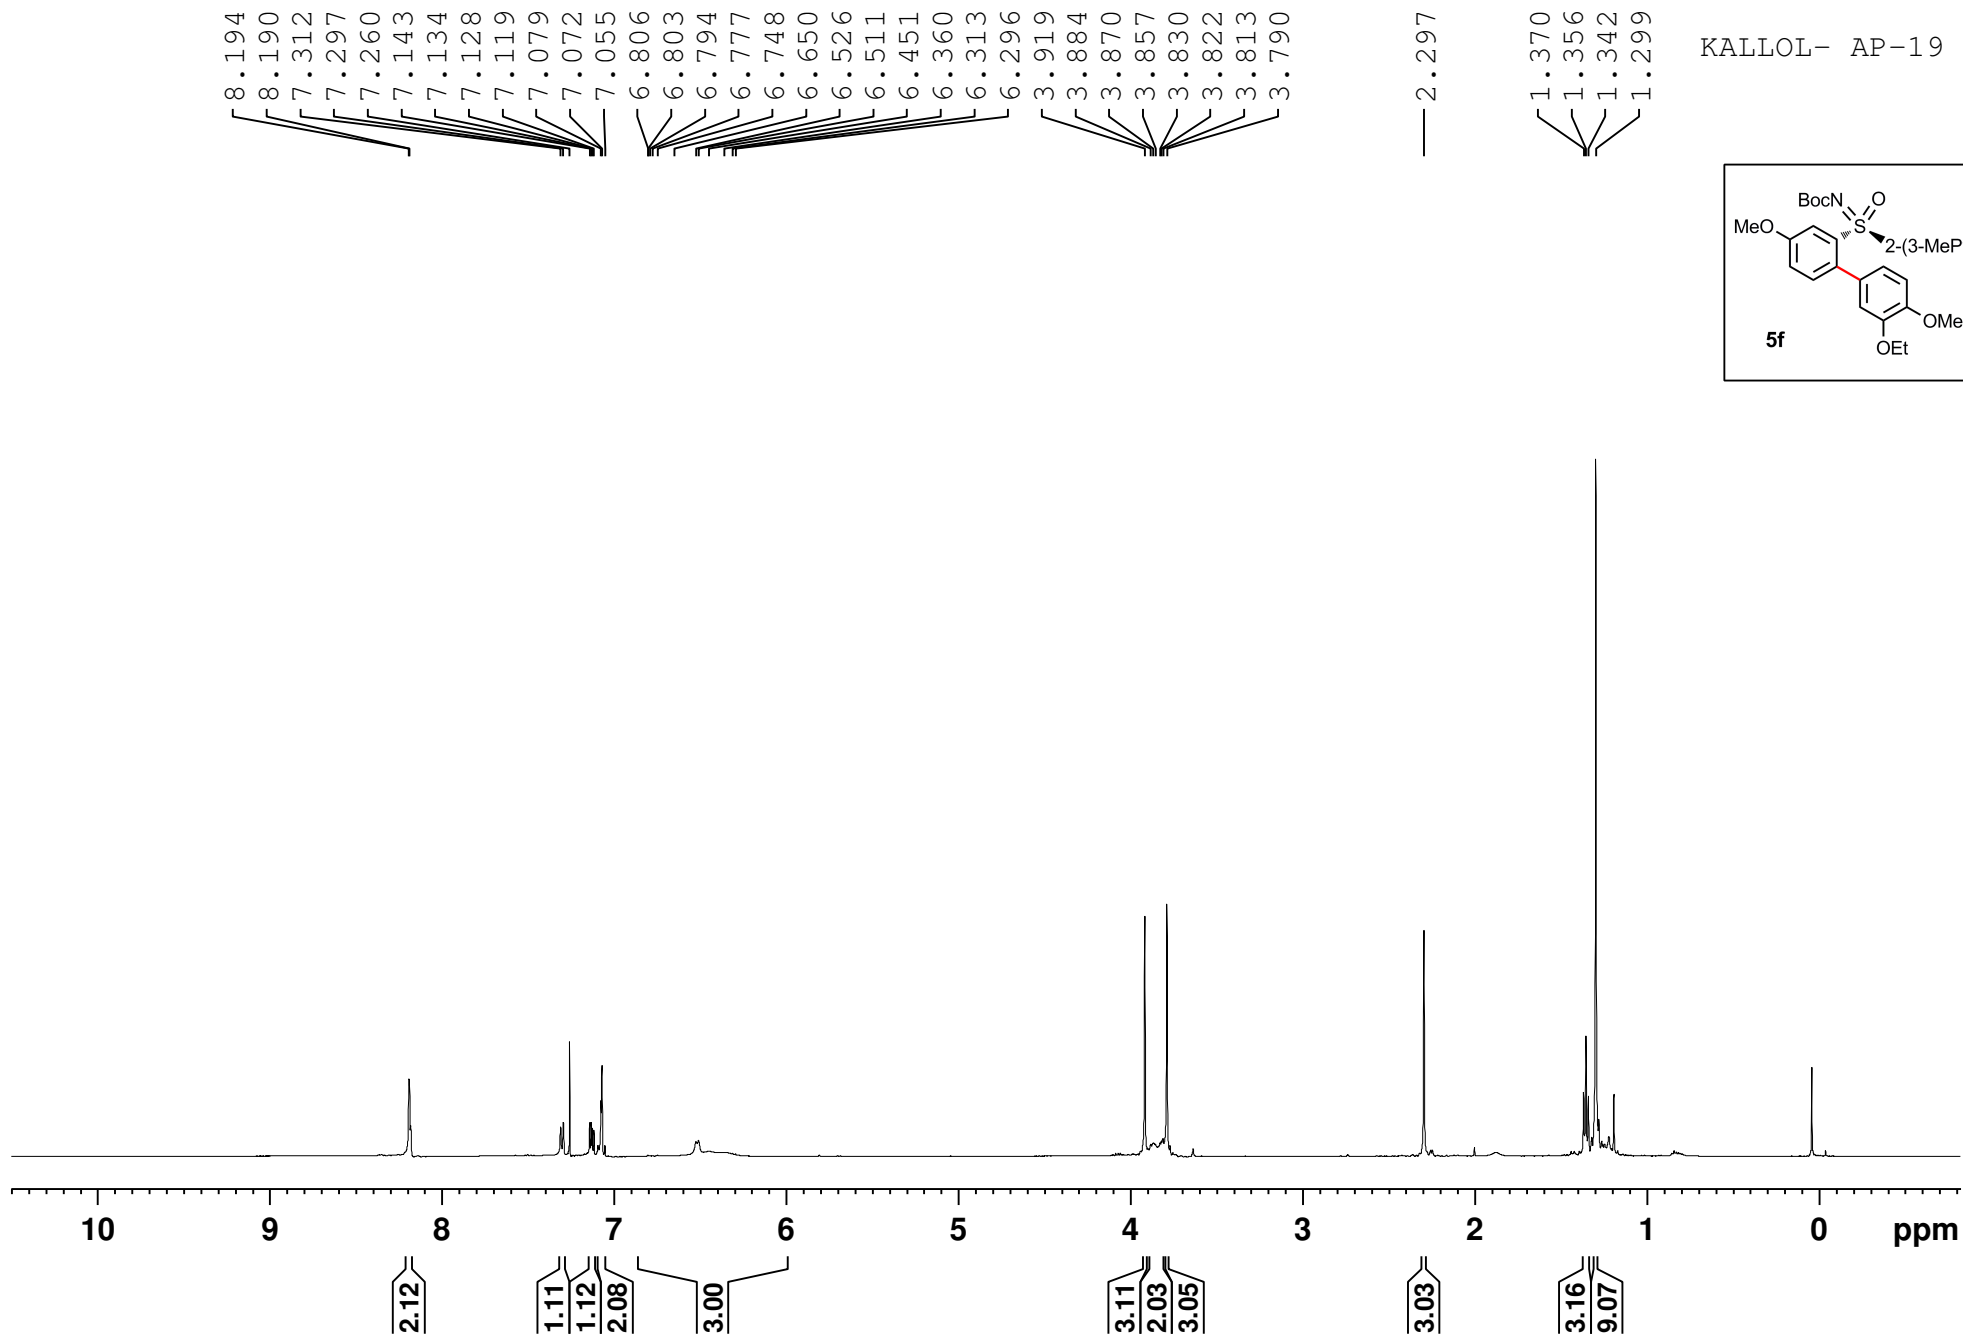

158.38  
157.11  
154.85

148.25  
146.69  
145.73

140.51  
138.25  
136.67  
134.11  
133.90  
130.33

125.82  
122.02  
119.39

114.40  
113.96  
110.22

79.93  
77.25  
77.00  
76.74

63.79

55.88  
55.75

27.84

18.83  
14.62

KALLOL- AP-19

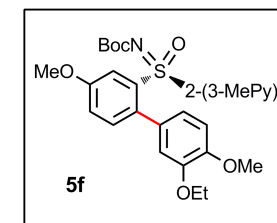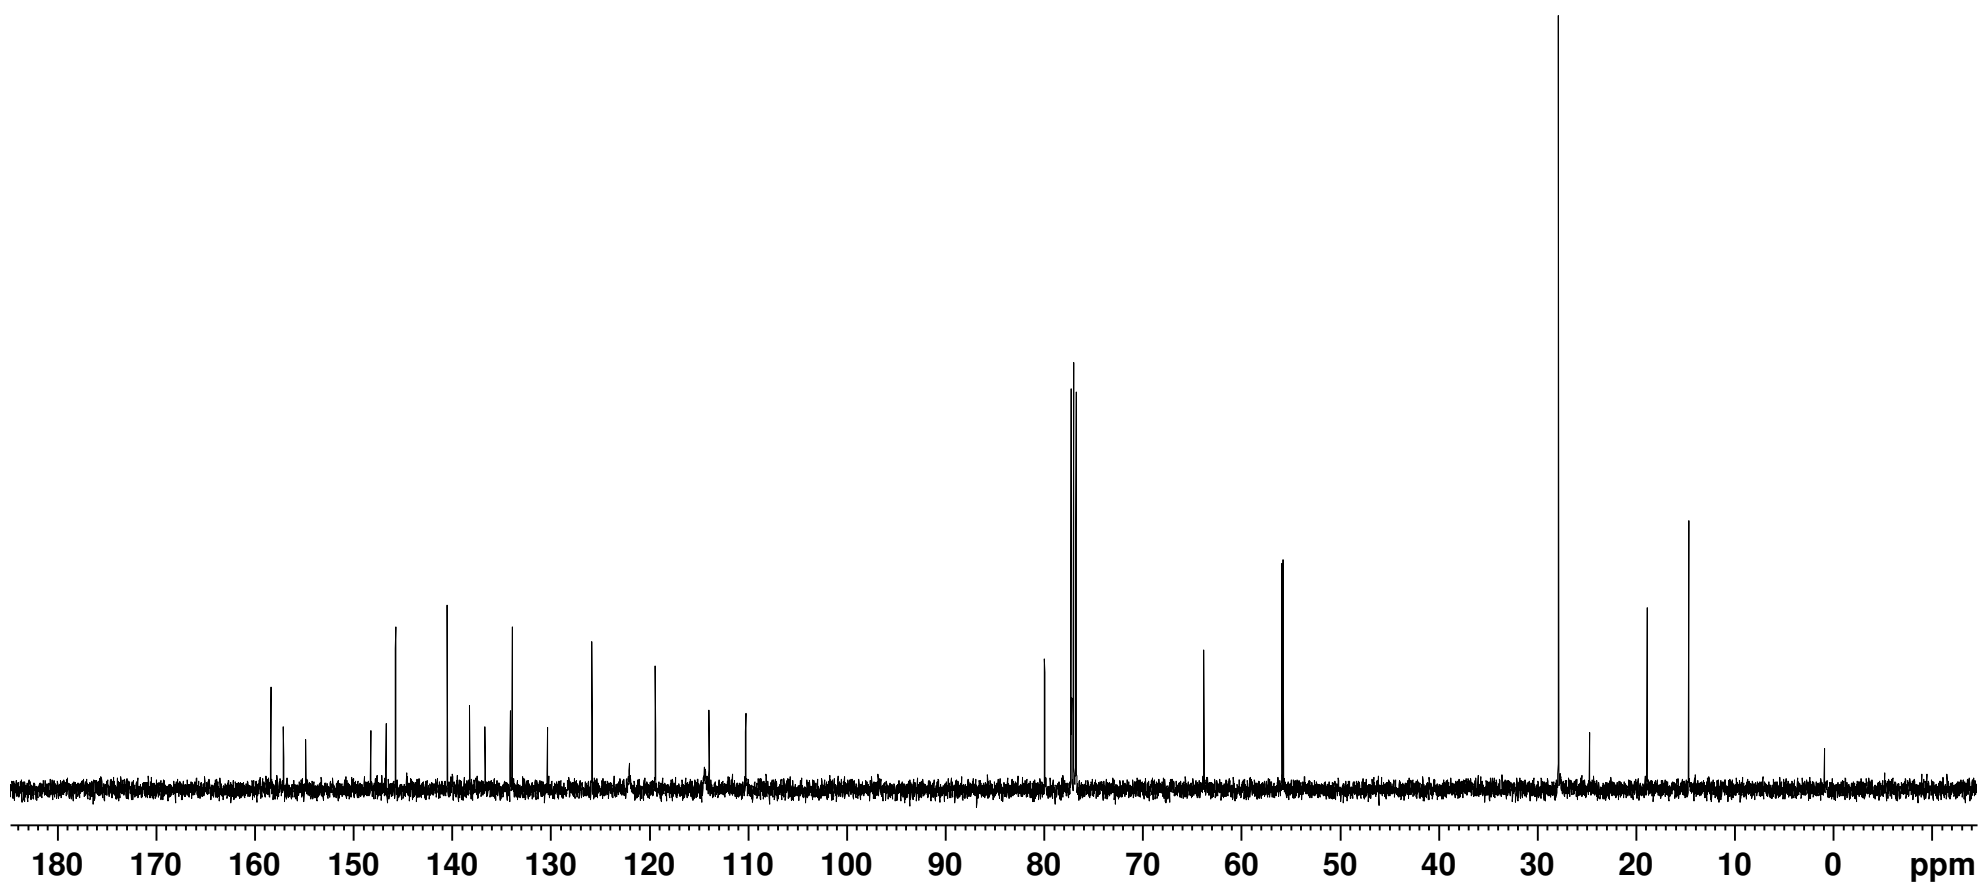

K AP-108 3R

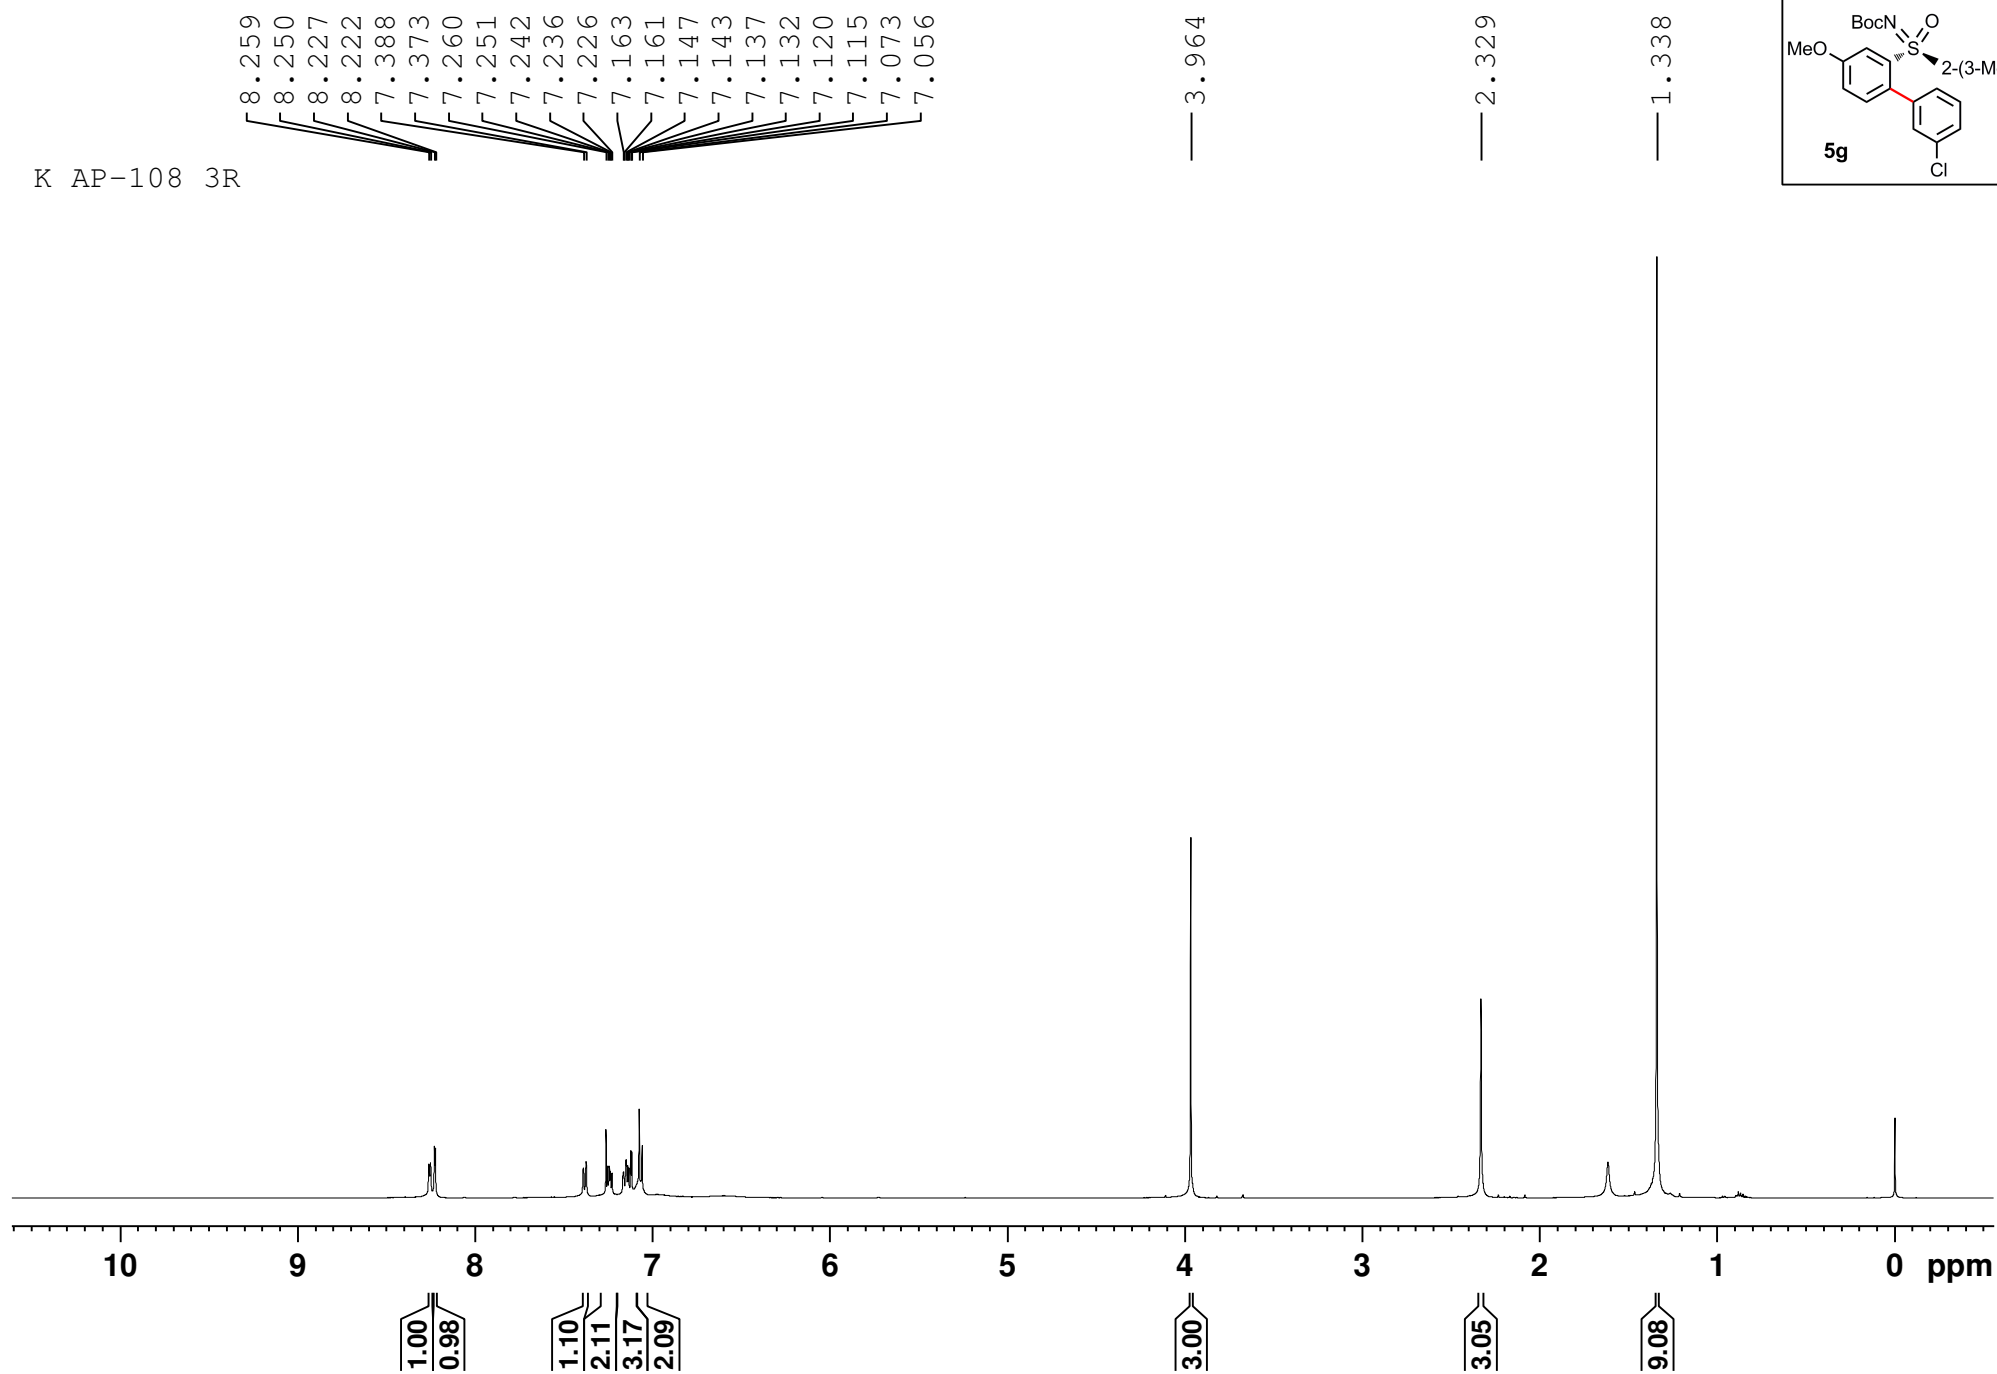

K-AP-108-3R

158.94  
157.10  
154.89  
146.04  
140.92  
139.80  
138.21  
136.93  
133.47  
132.92  
132.81  
128.46  
127.47  
126.25  
119.47  
114.59

80.25  
77.25  
77.00  
76.74

55.90

27.96

18.94

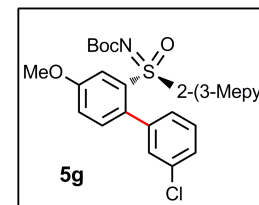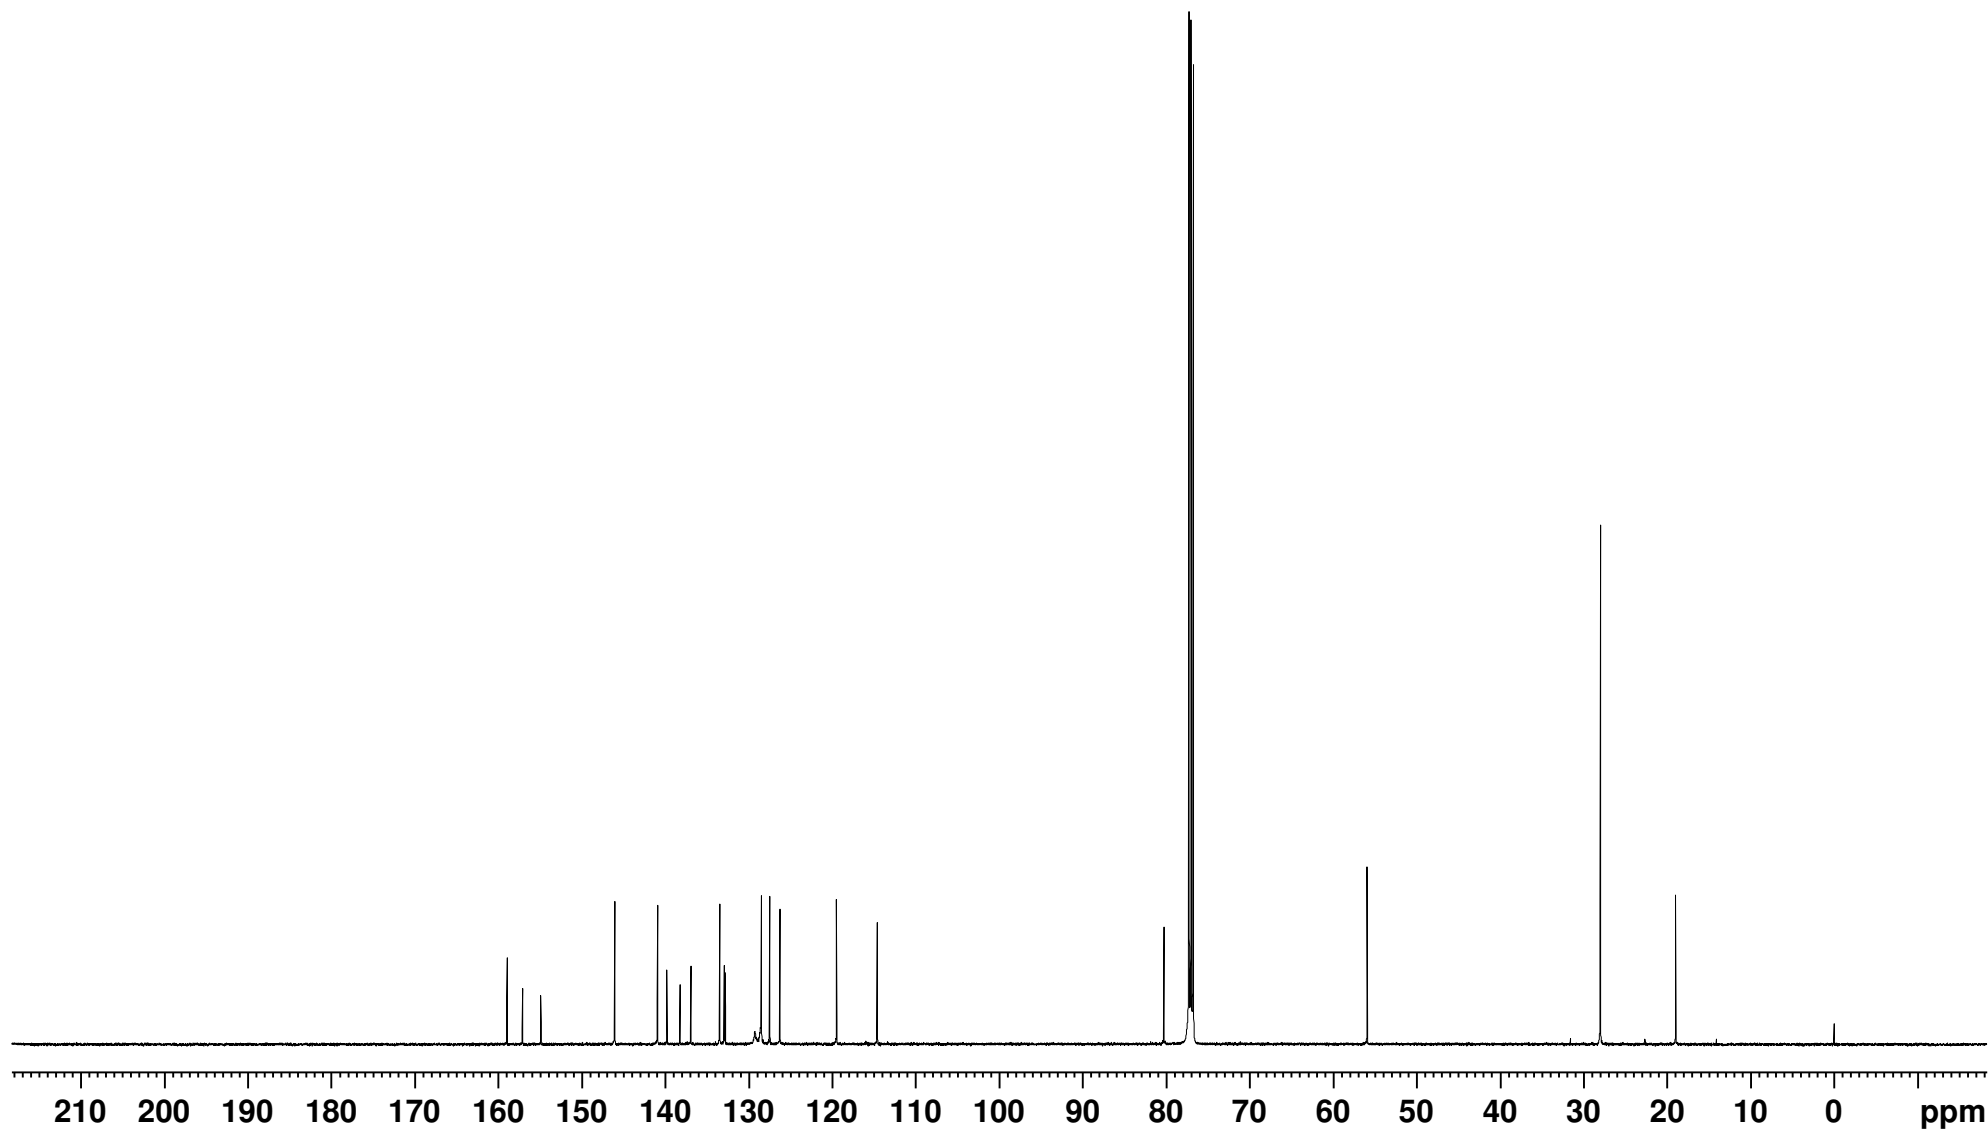

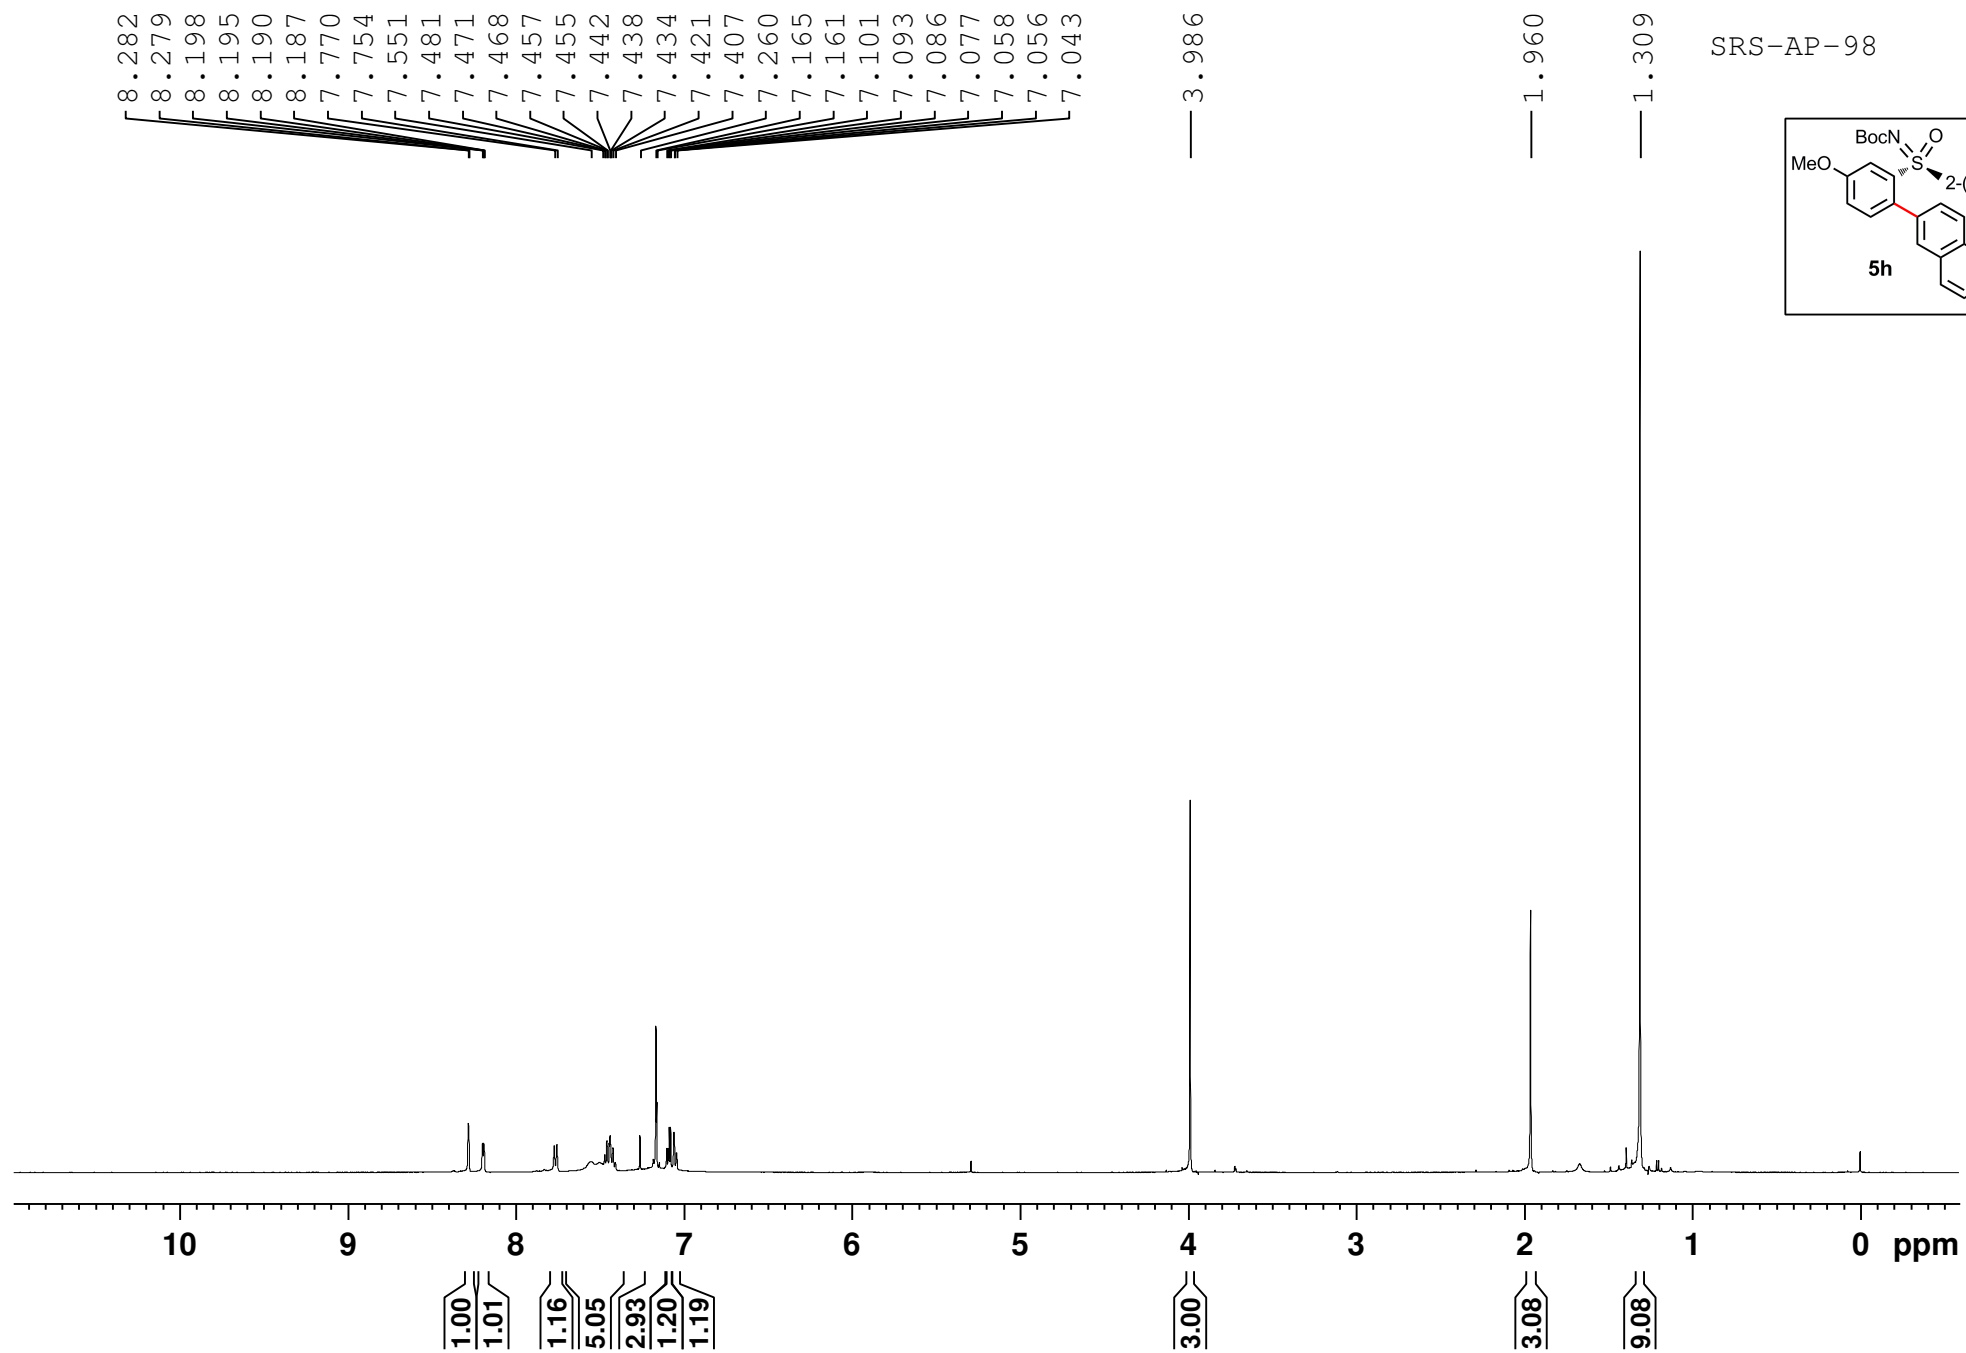

SRS-AP-98

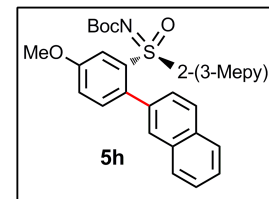

SRS-AP-98

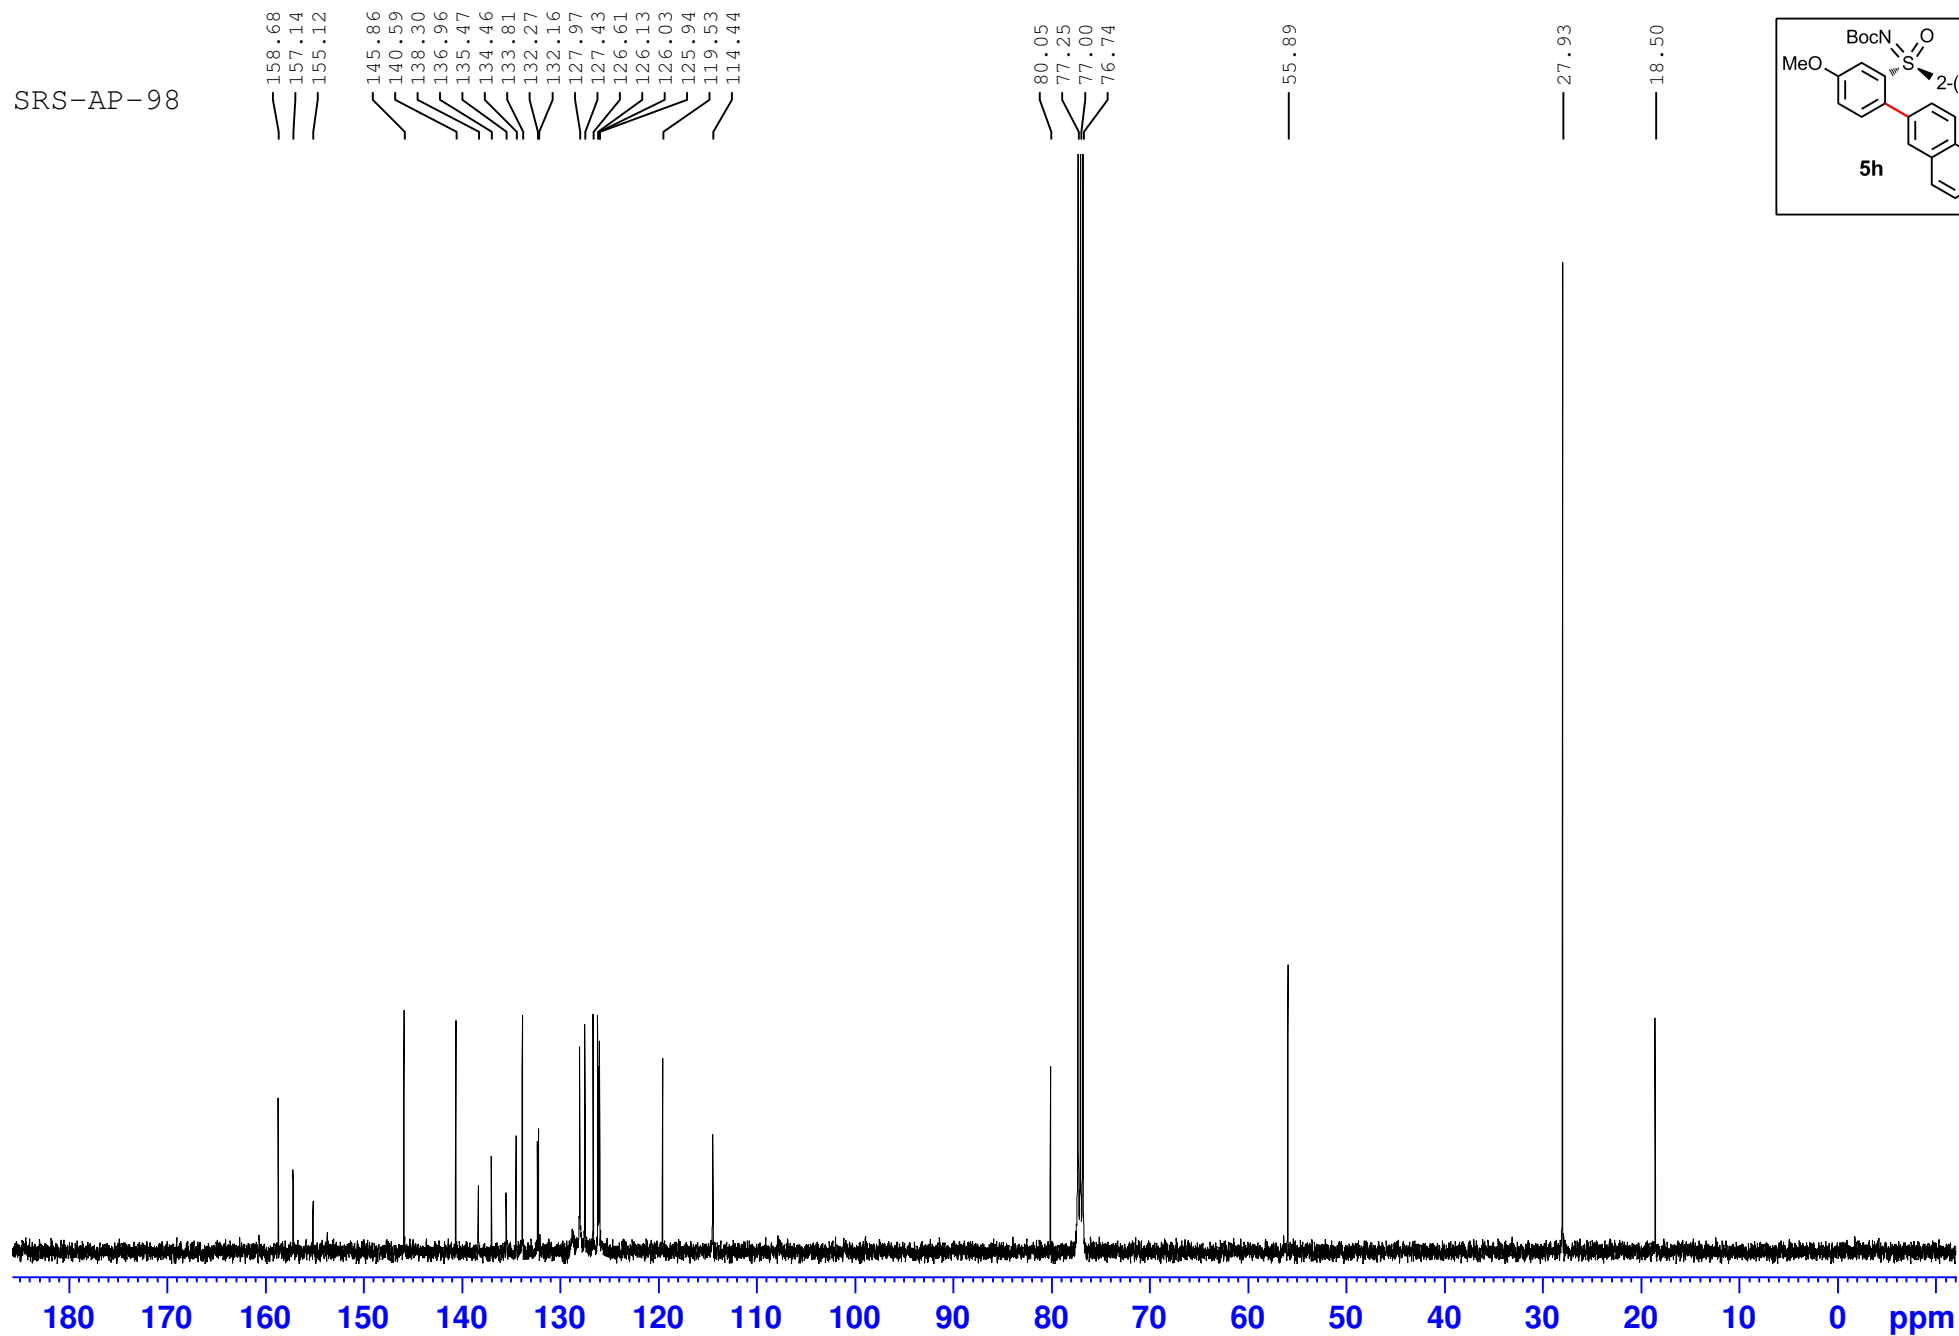



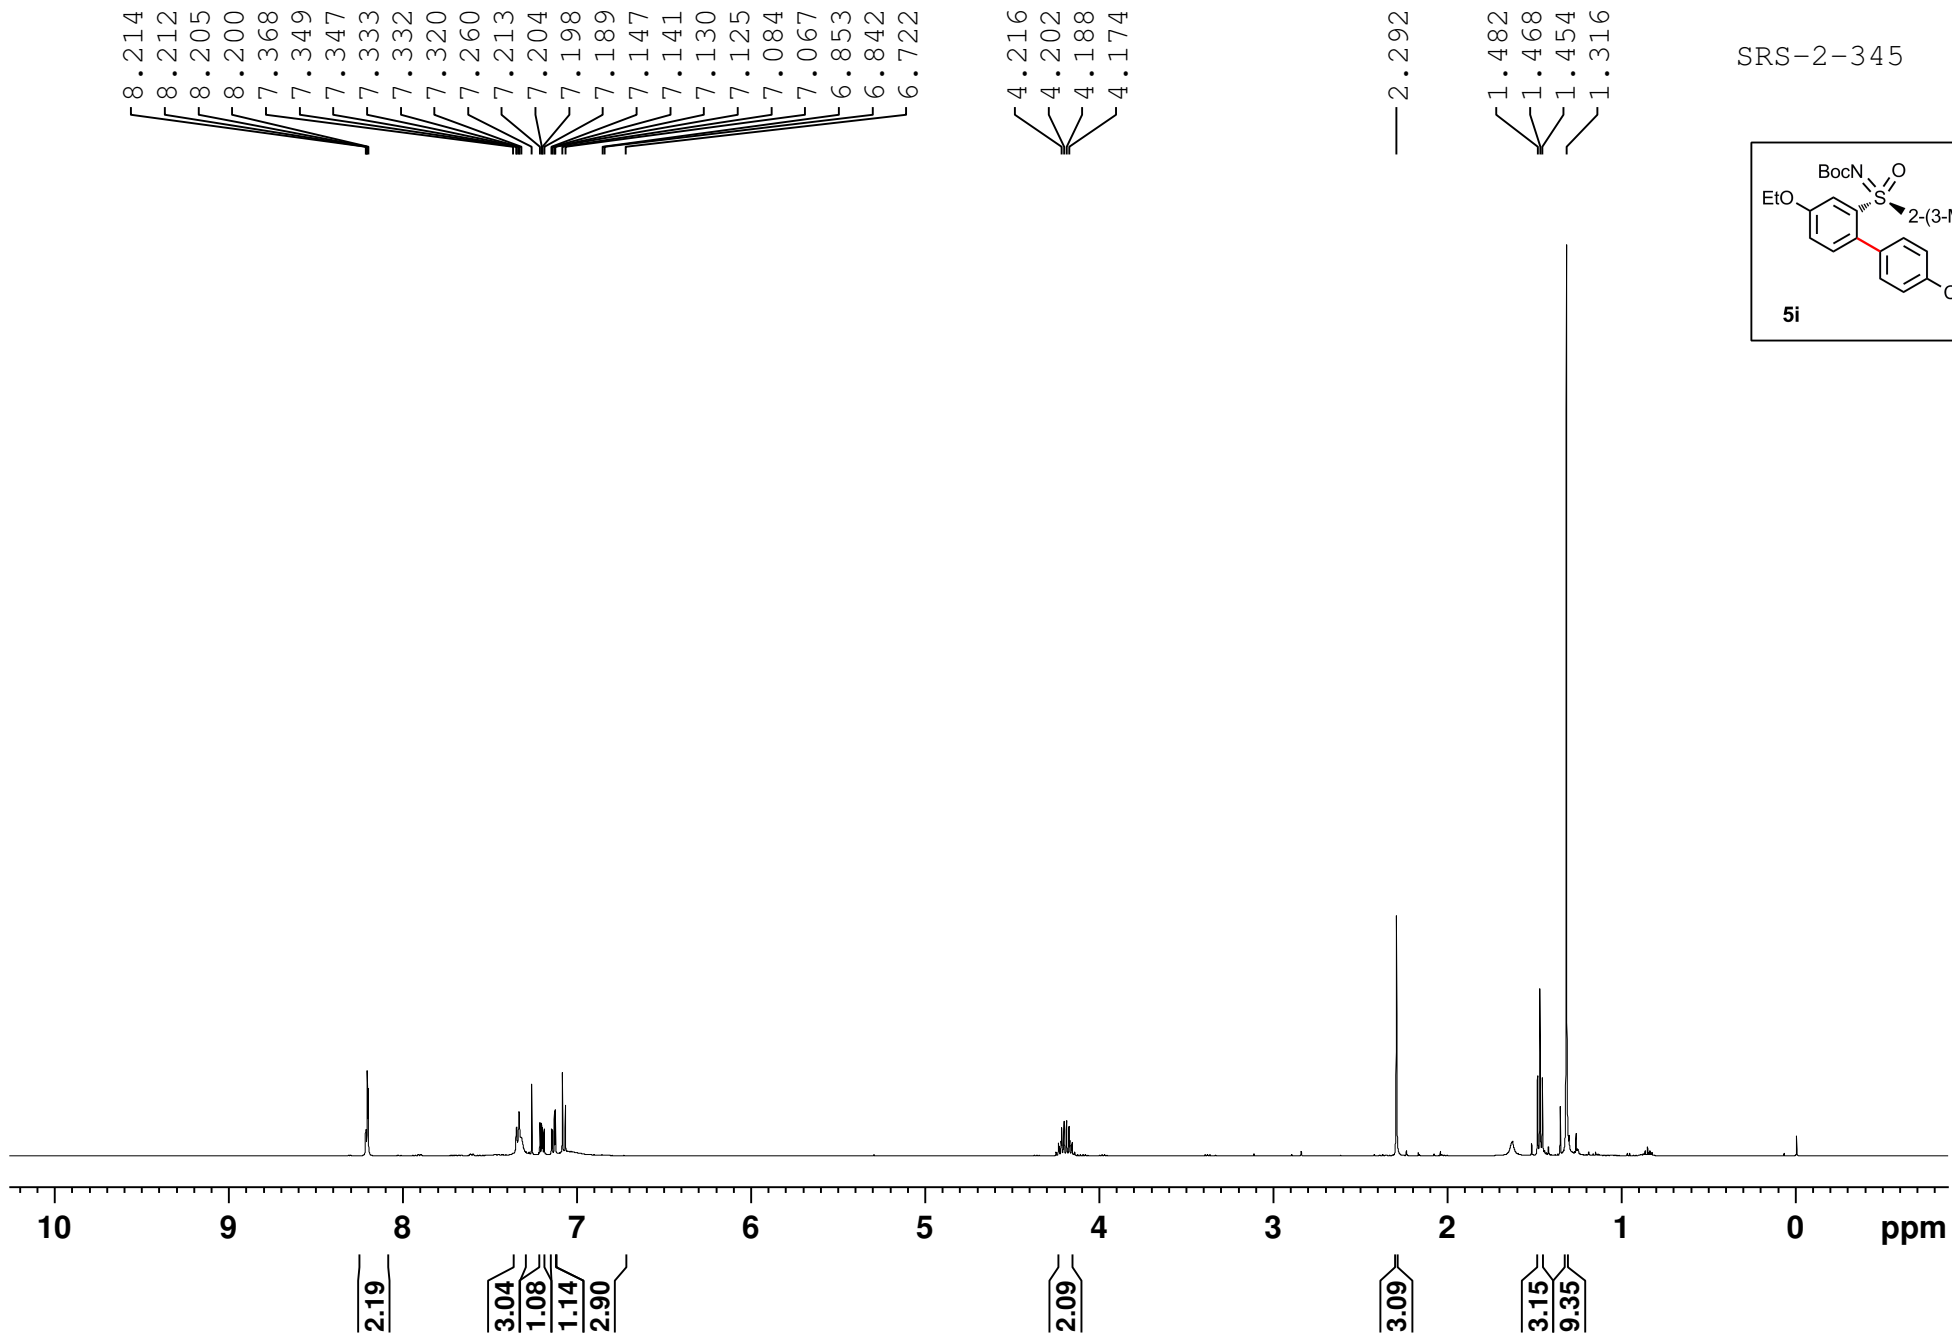

SRS-2-345

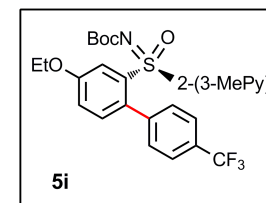

158.49  
156.96  
154.92

145.98  
141.85  
140.91  
137.95  
136.54  
133.29  
132.71  
130.25  
129.50  
129.24  
126.28  
125.11  
124.02  
123.98  
123.95  
123.93  
122.94  
119.74  
115.47

80.27  
77.25  
77.00  
76.74

64.29

27.93

18.82

14.66

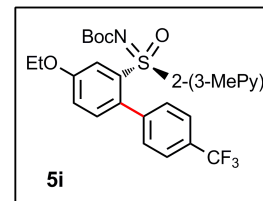

SRS-2-345

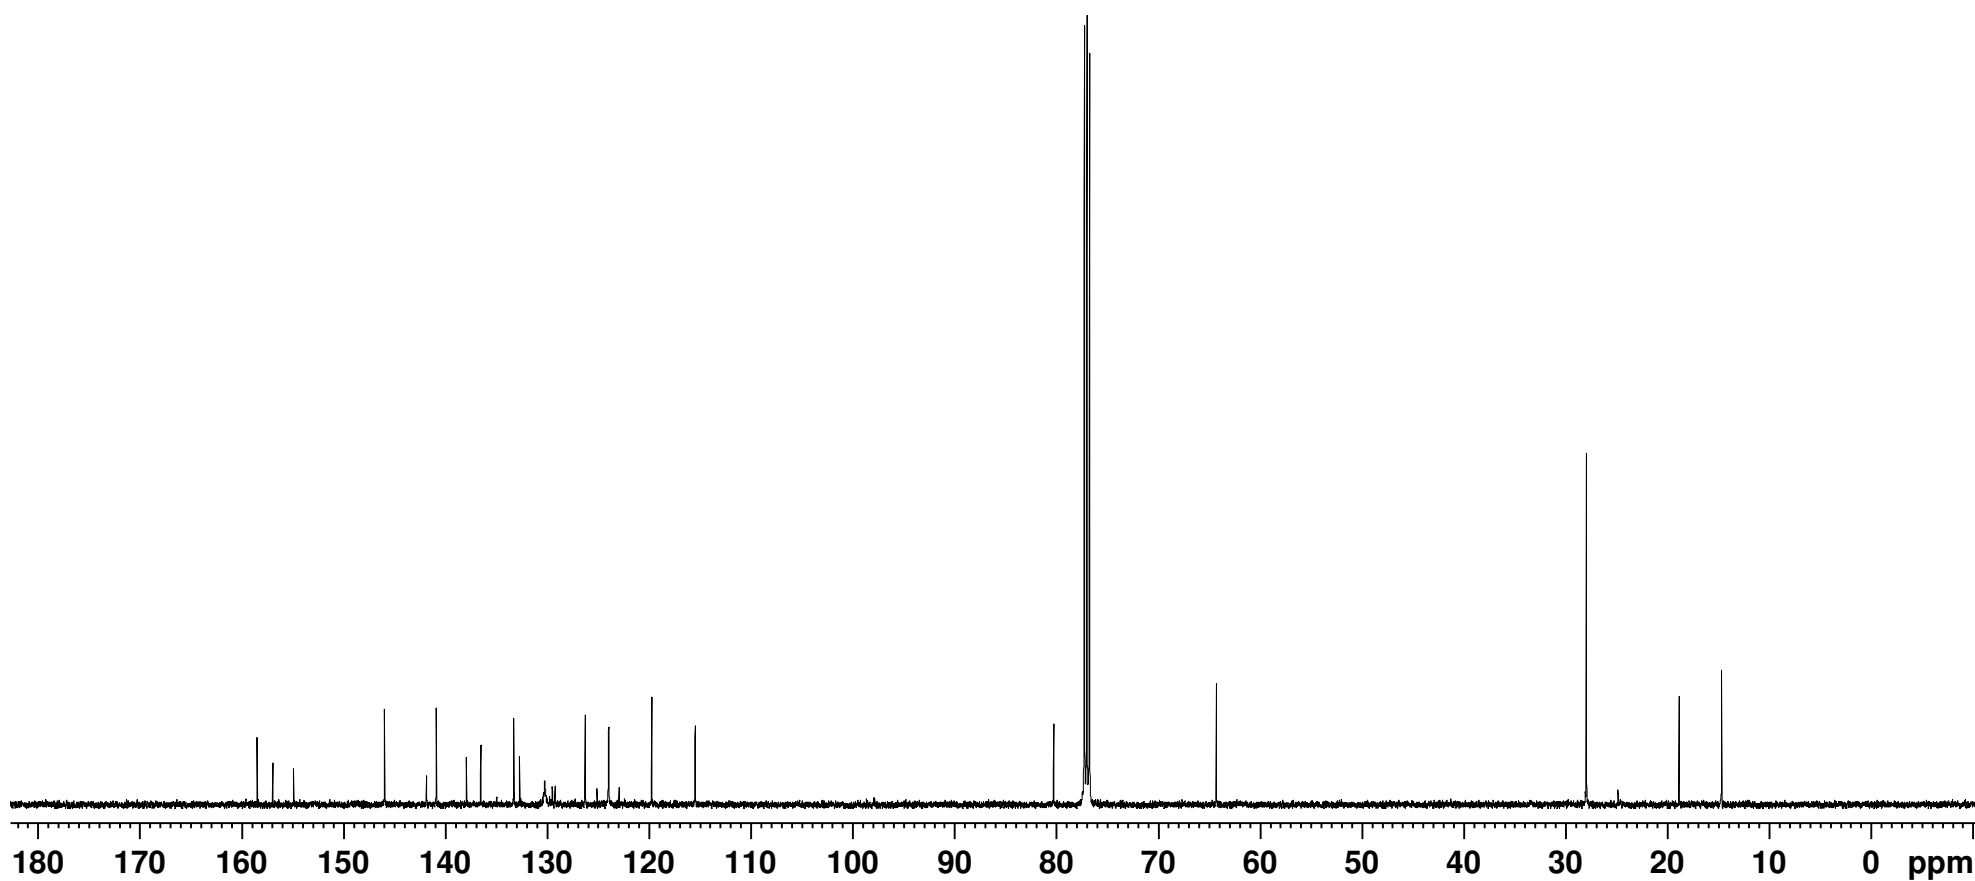

SRS-2-345

-62.73

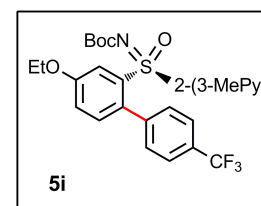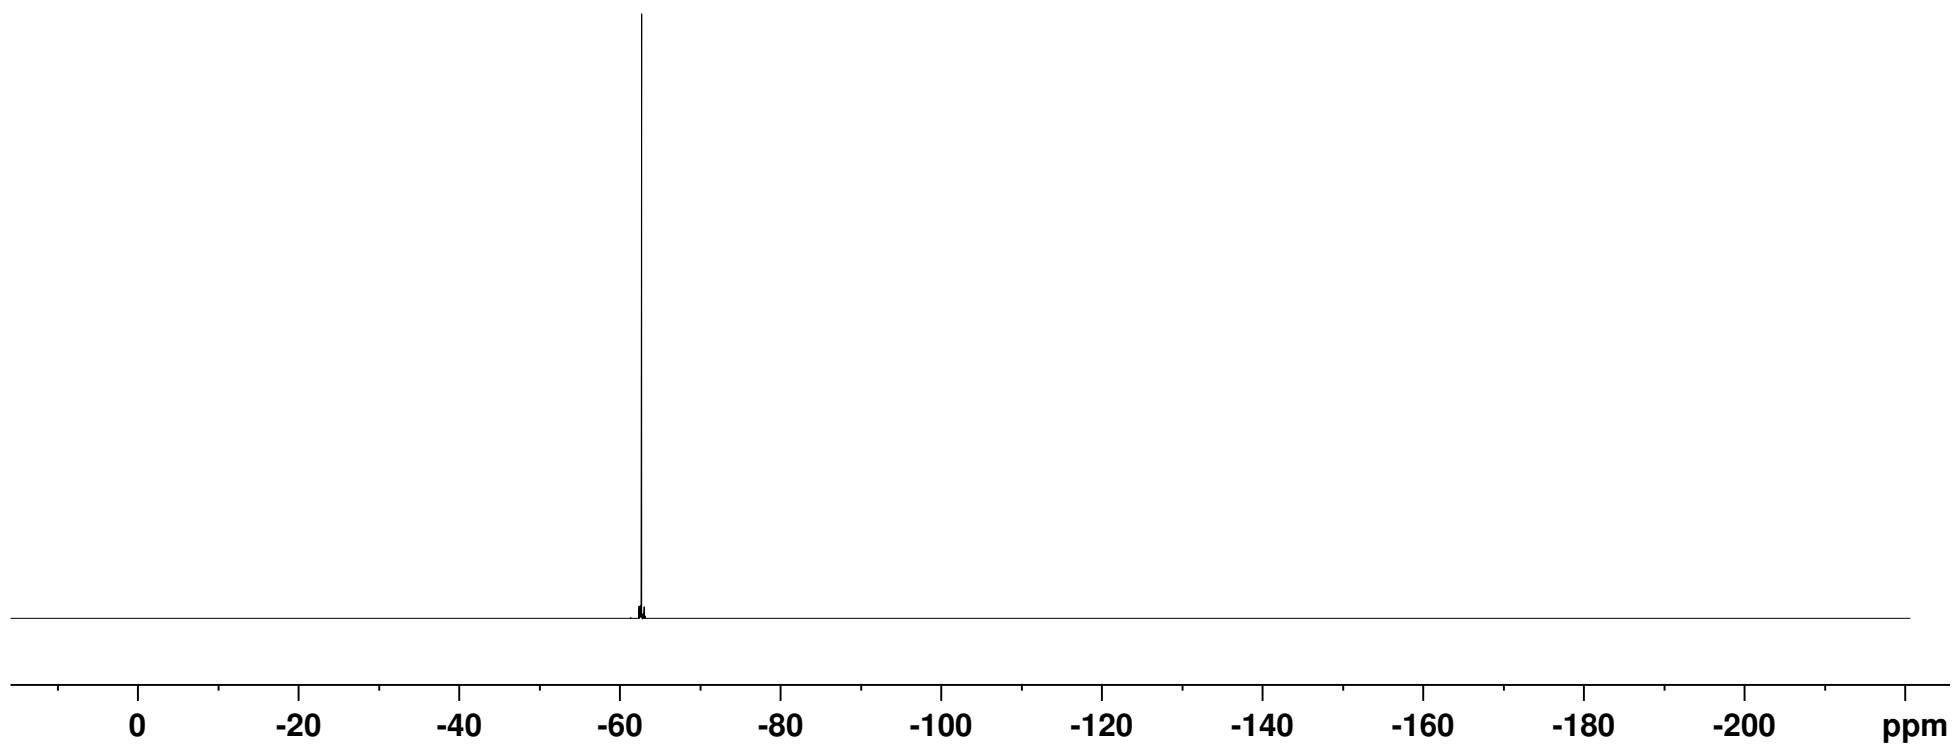

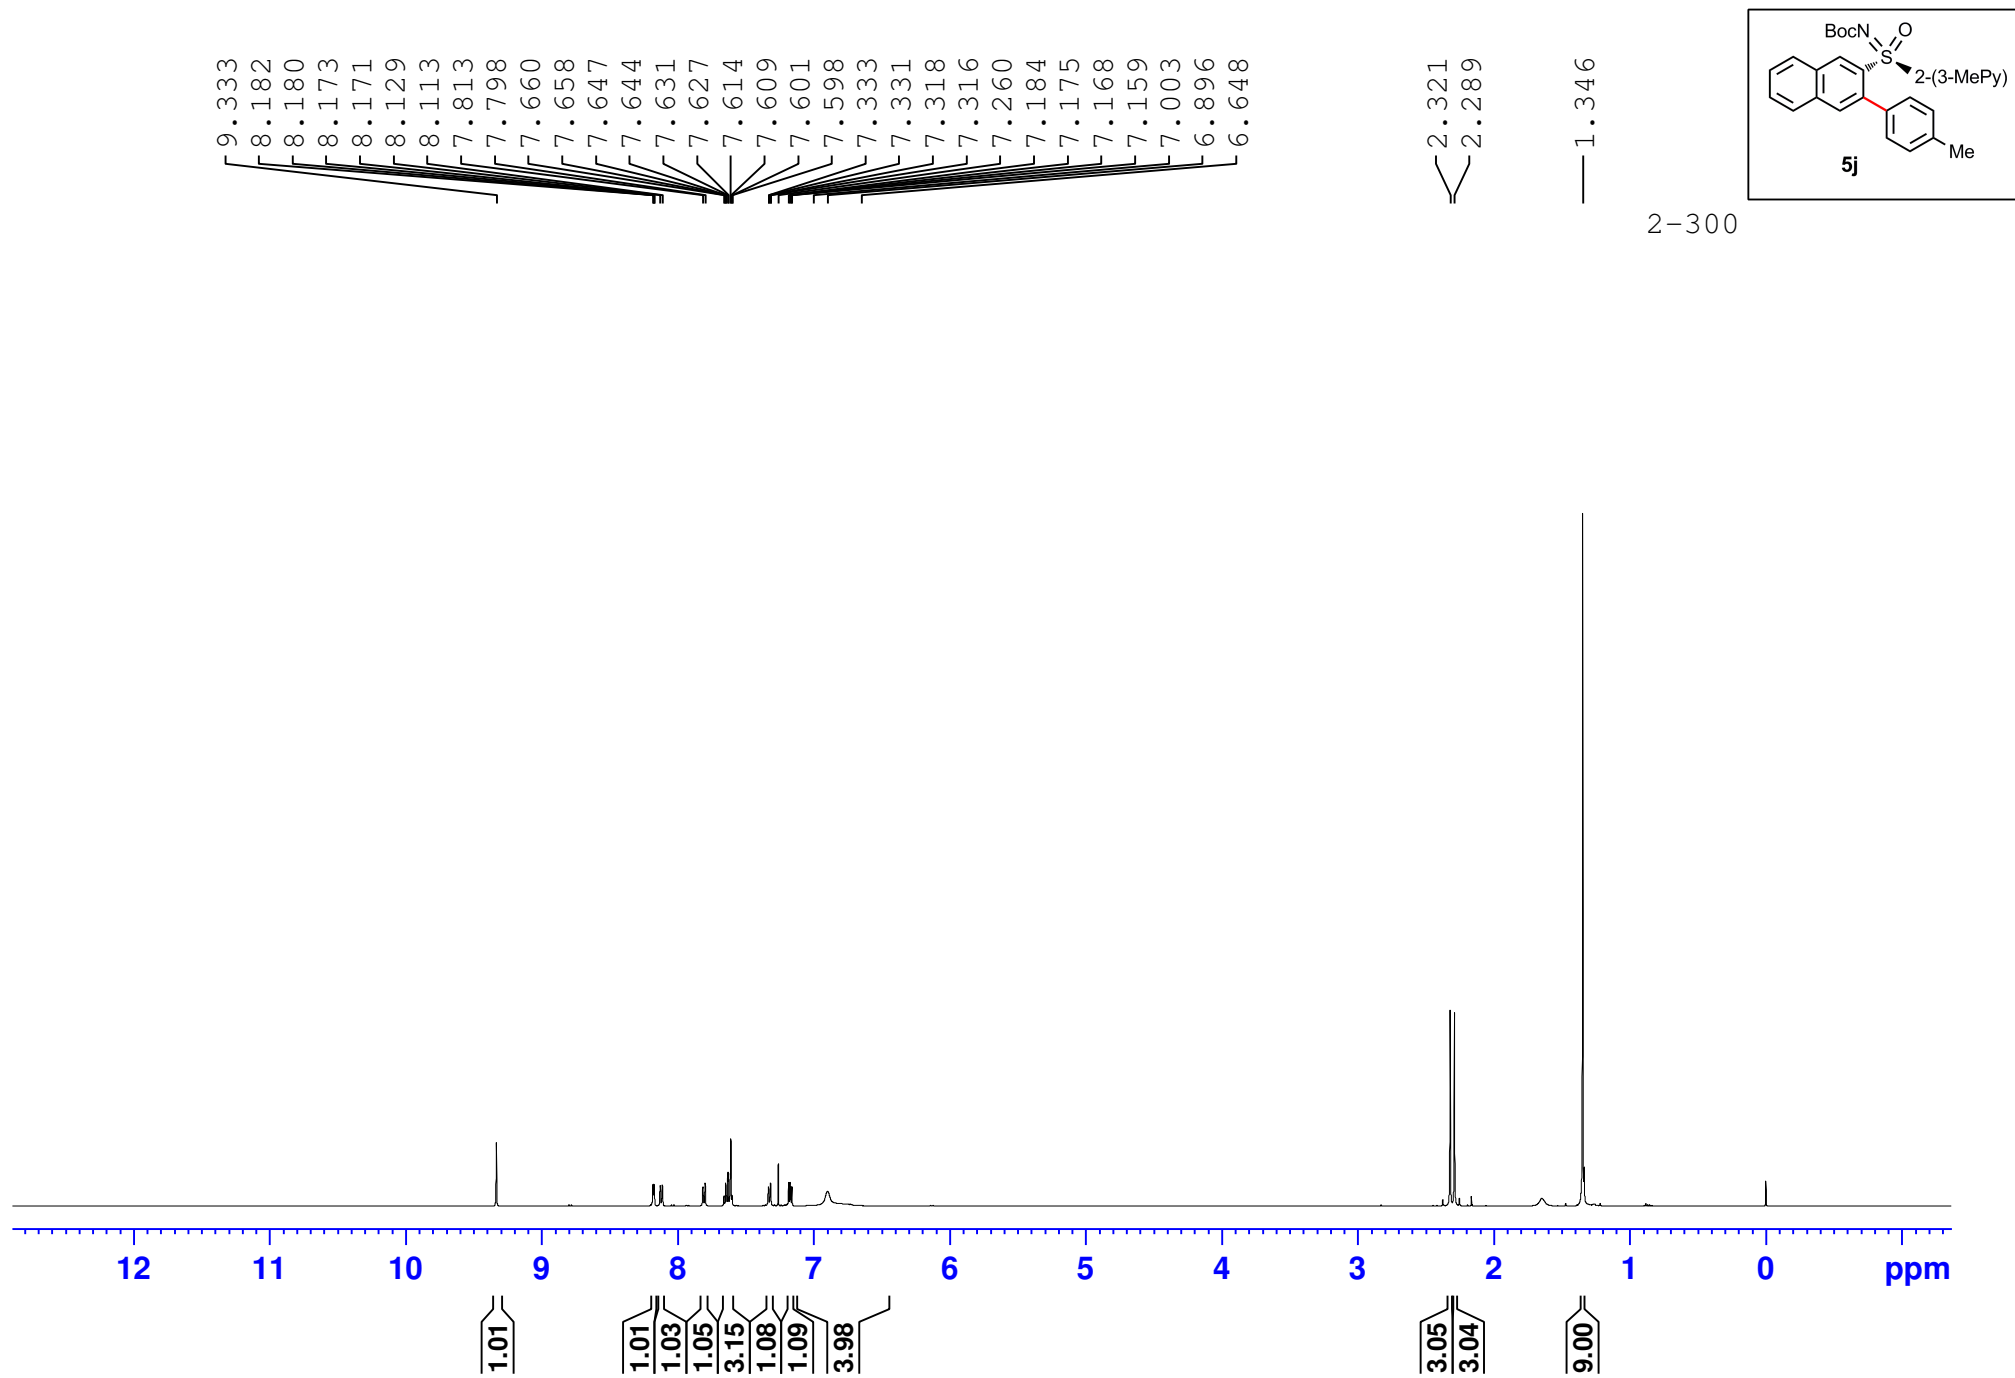

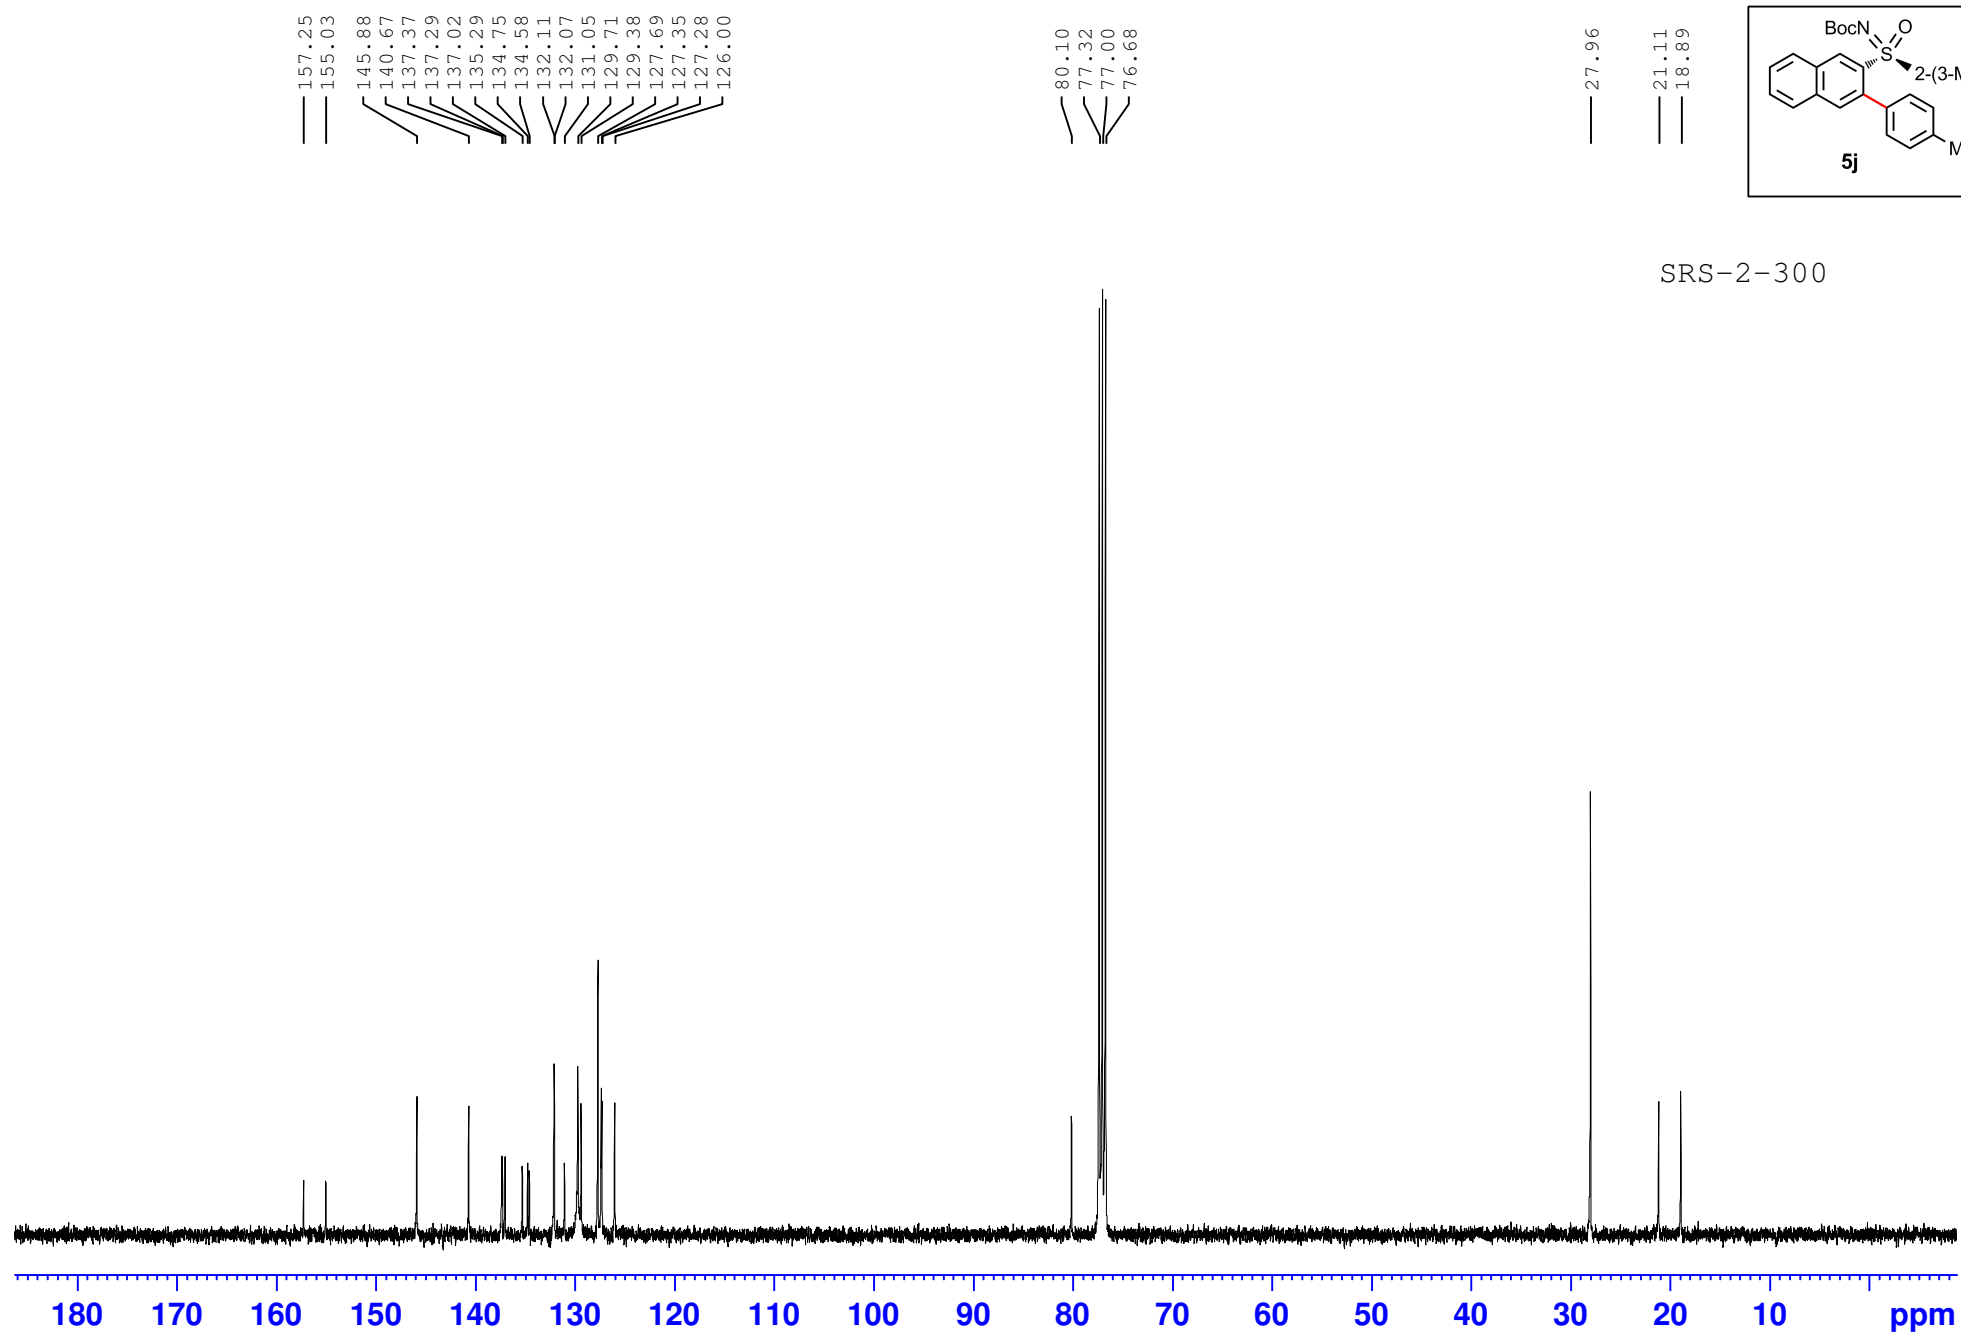

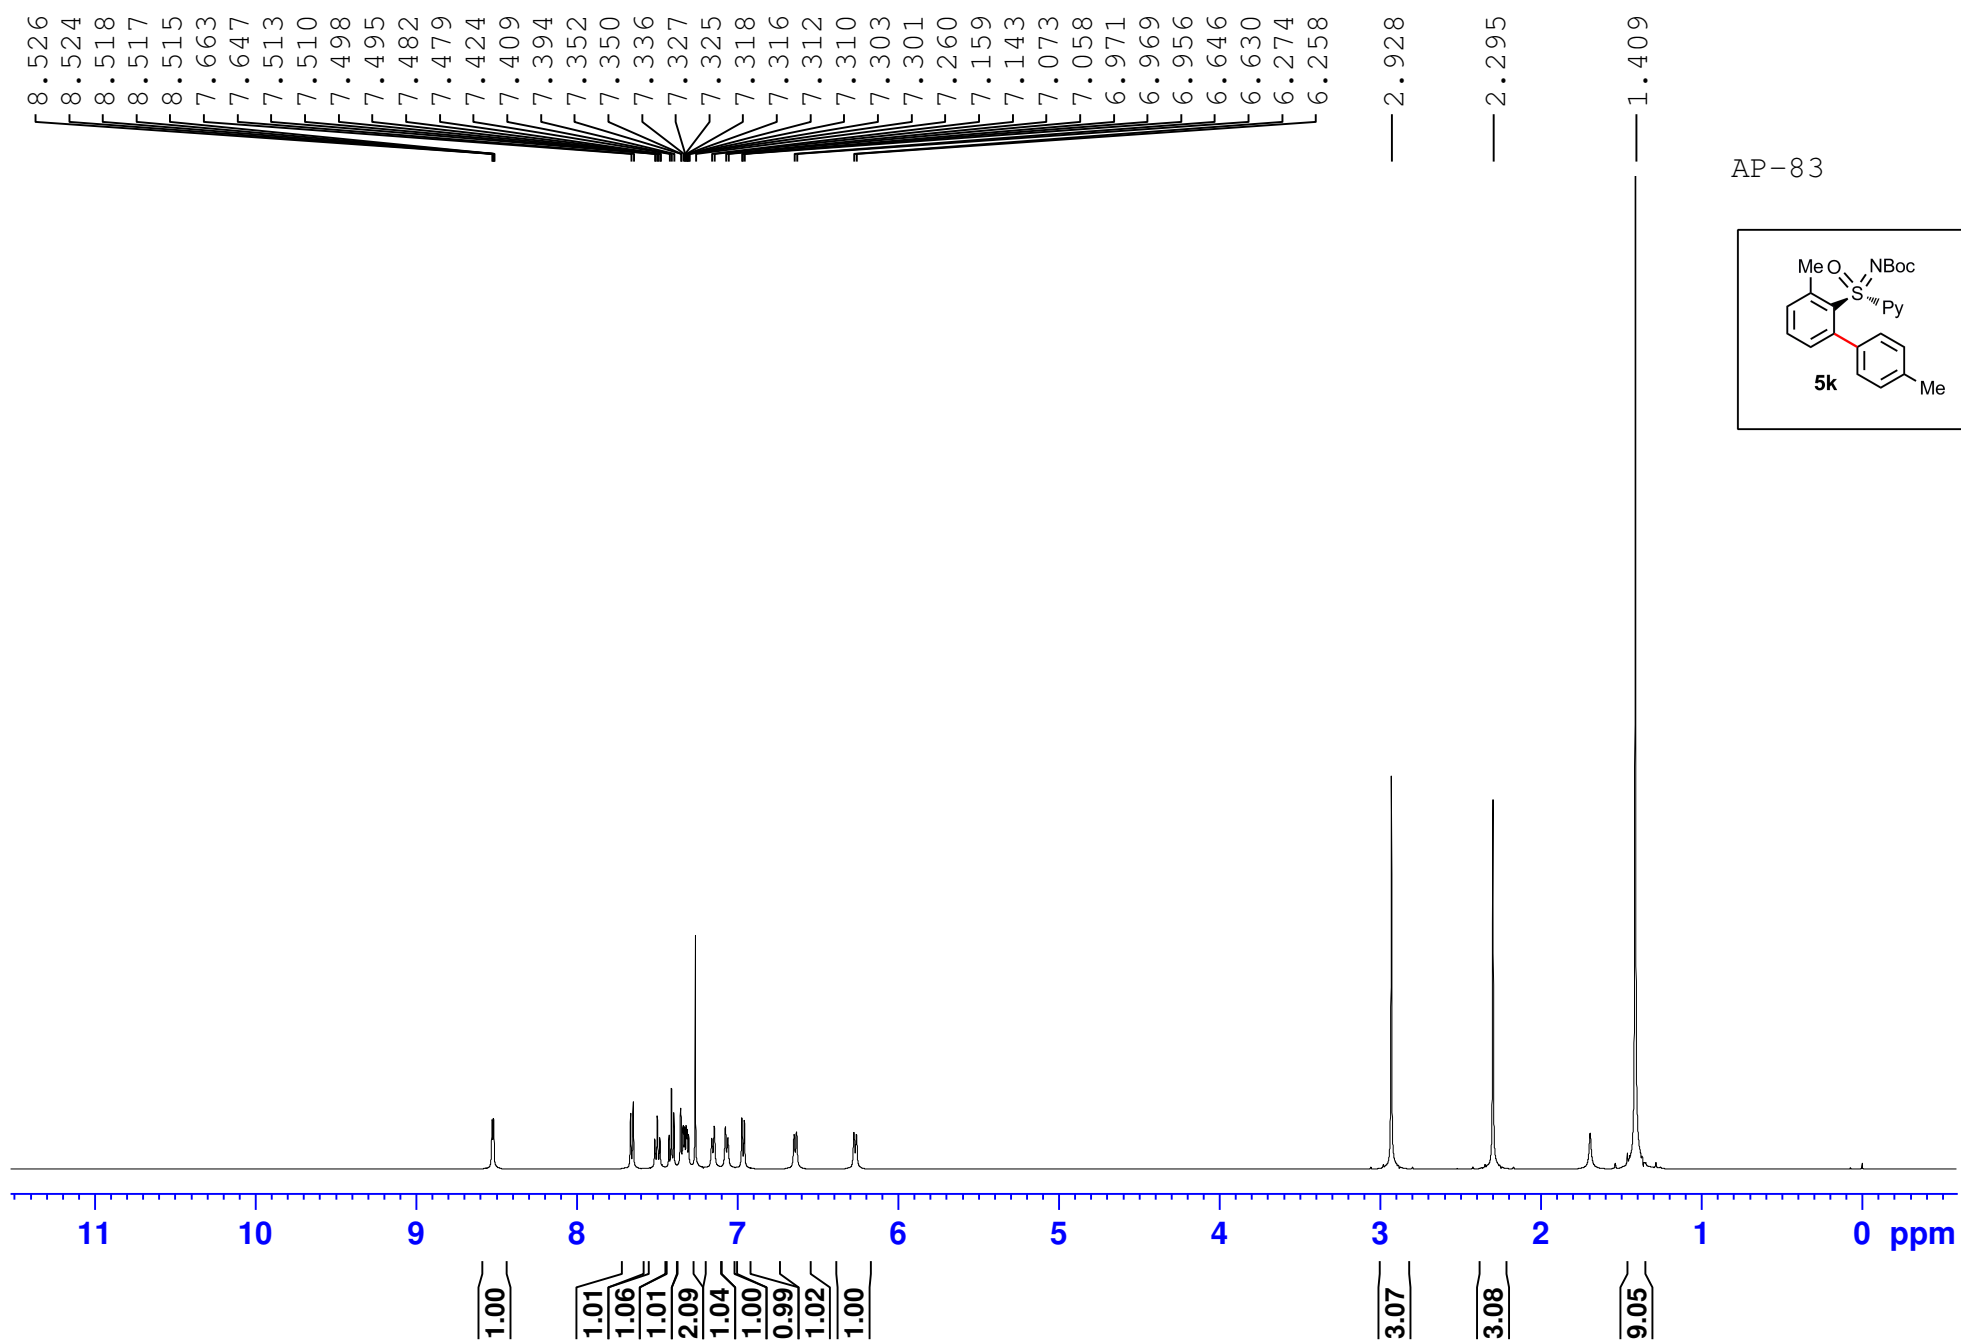

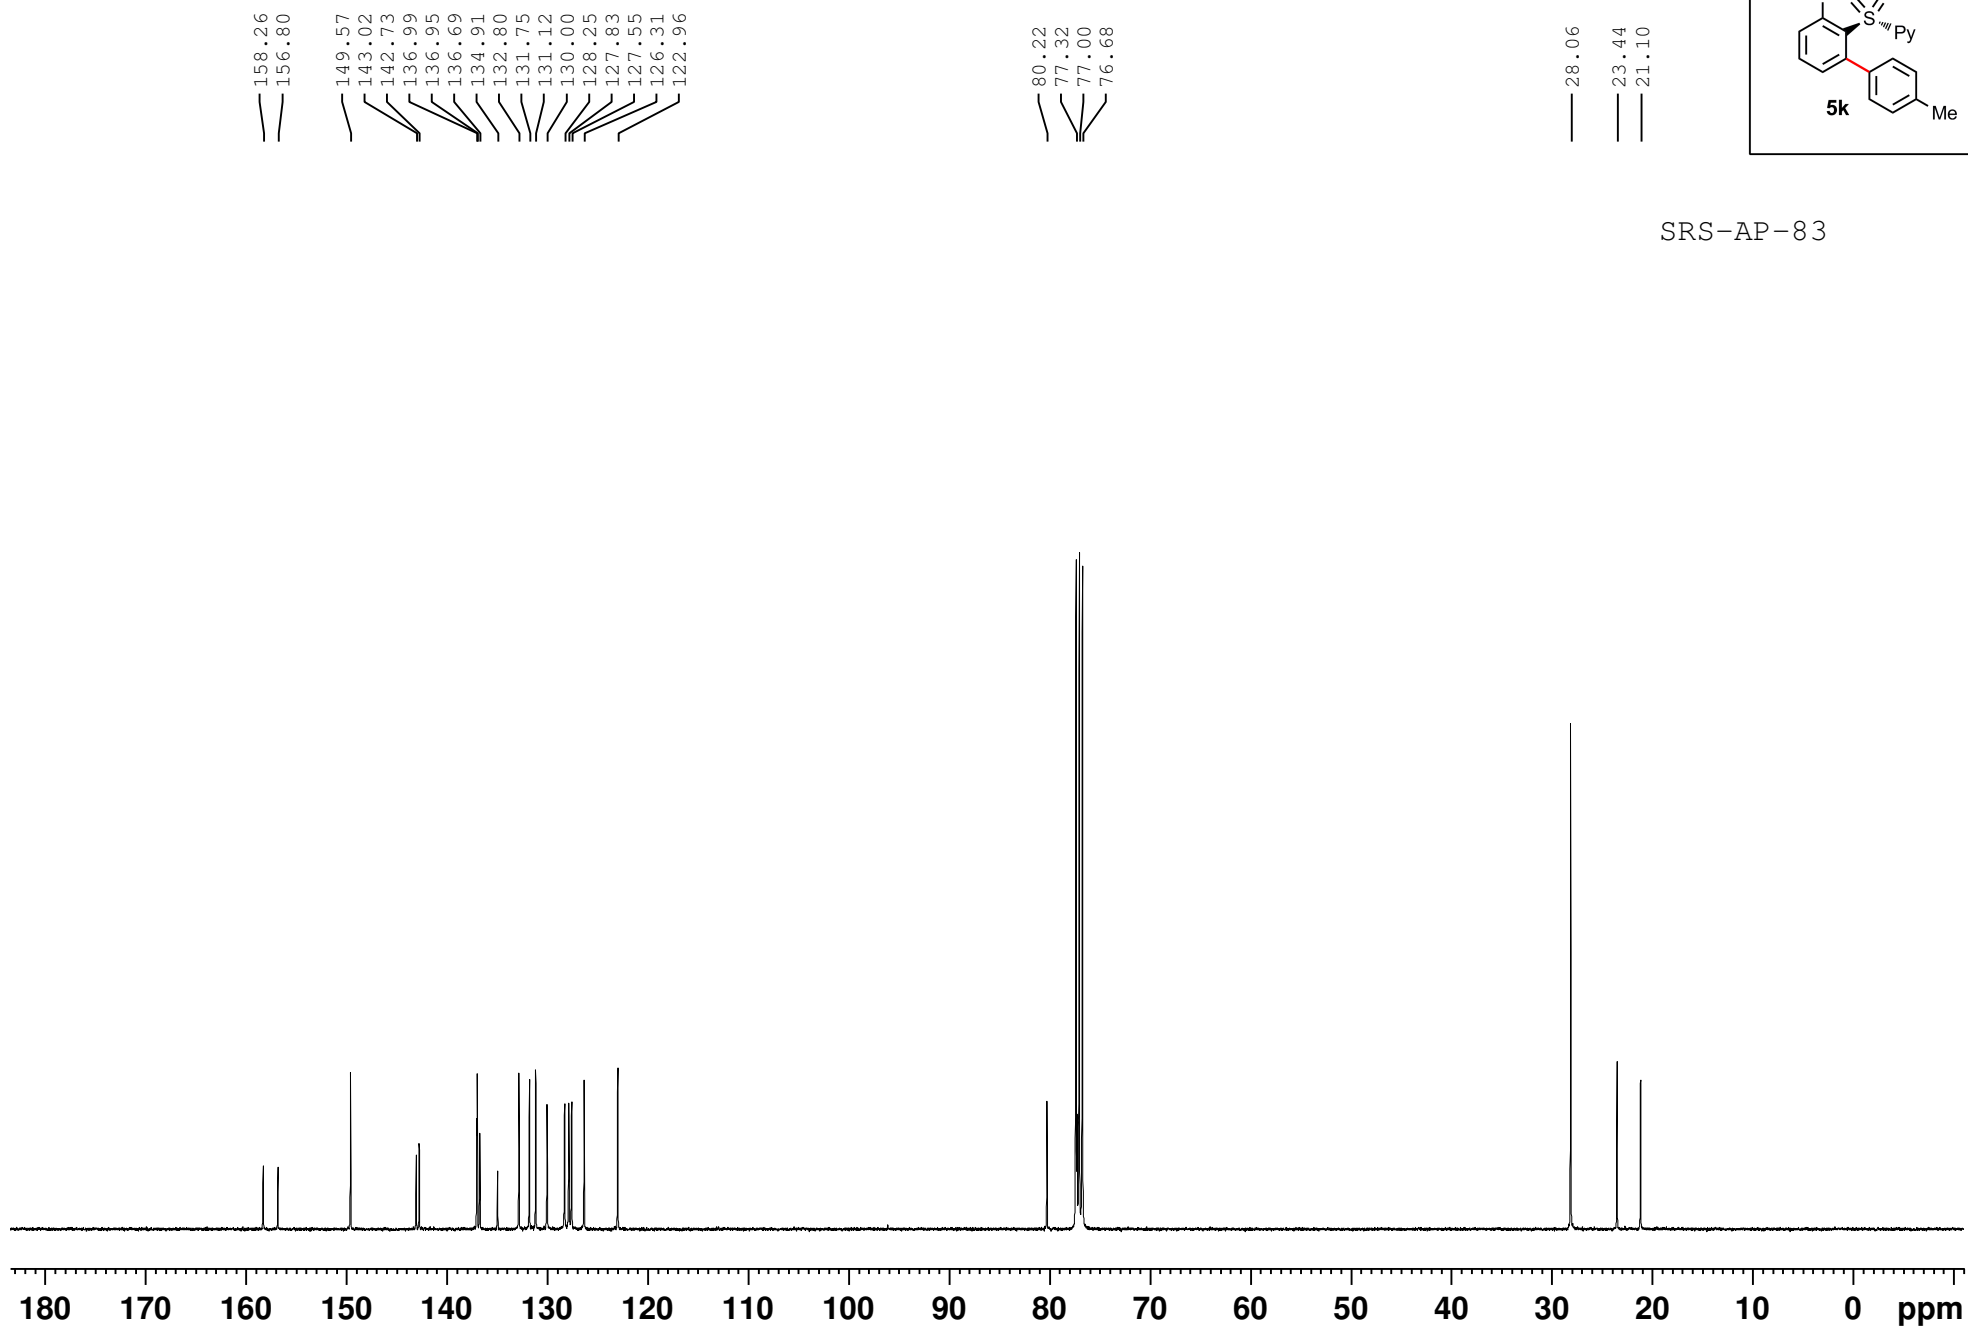

AP-81

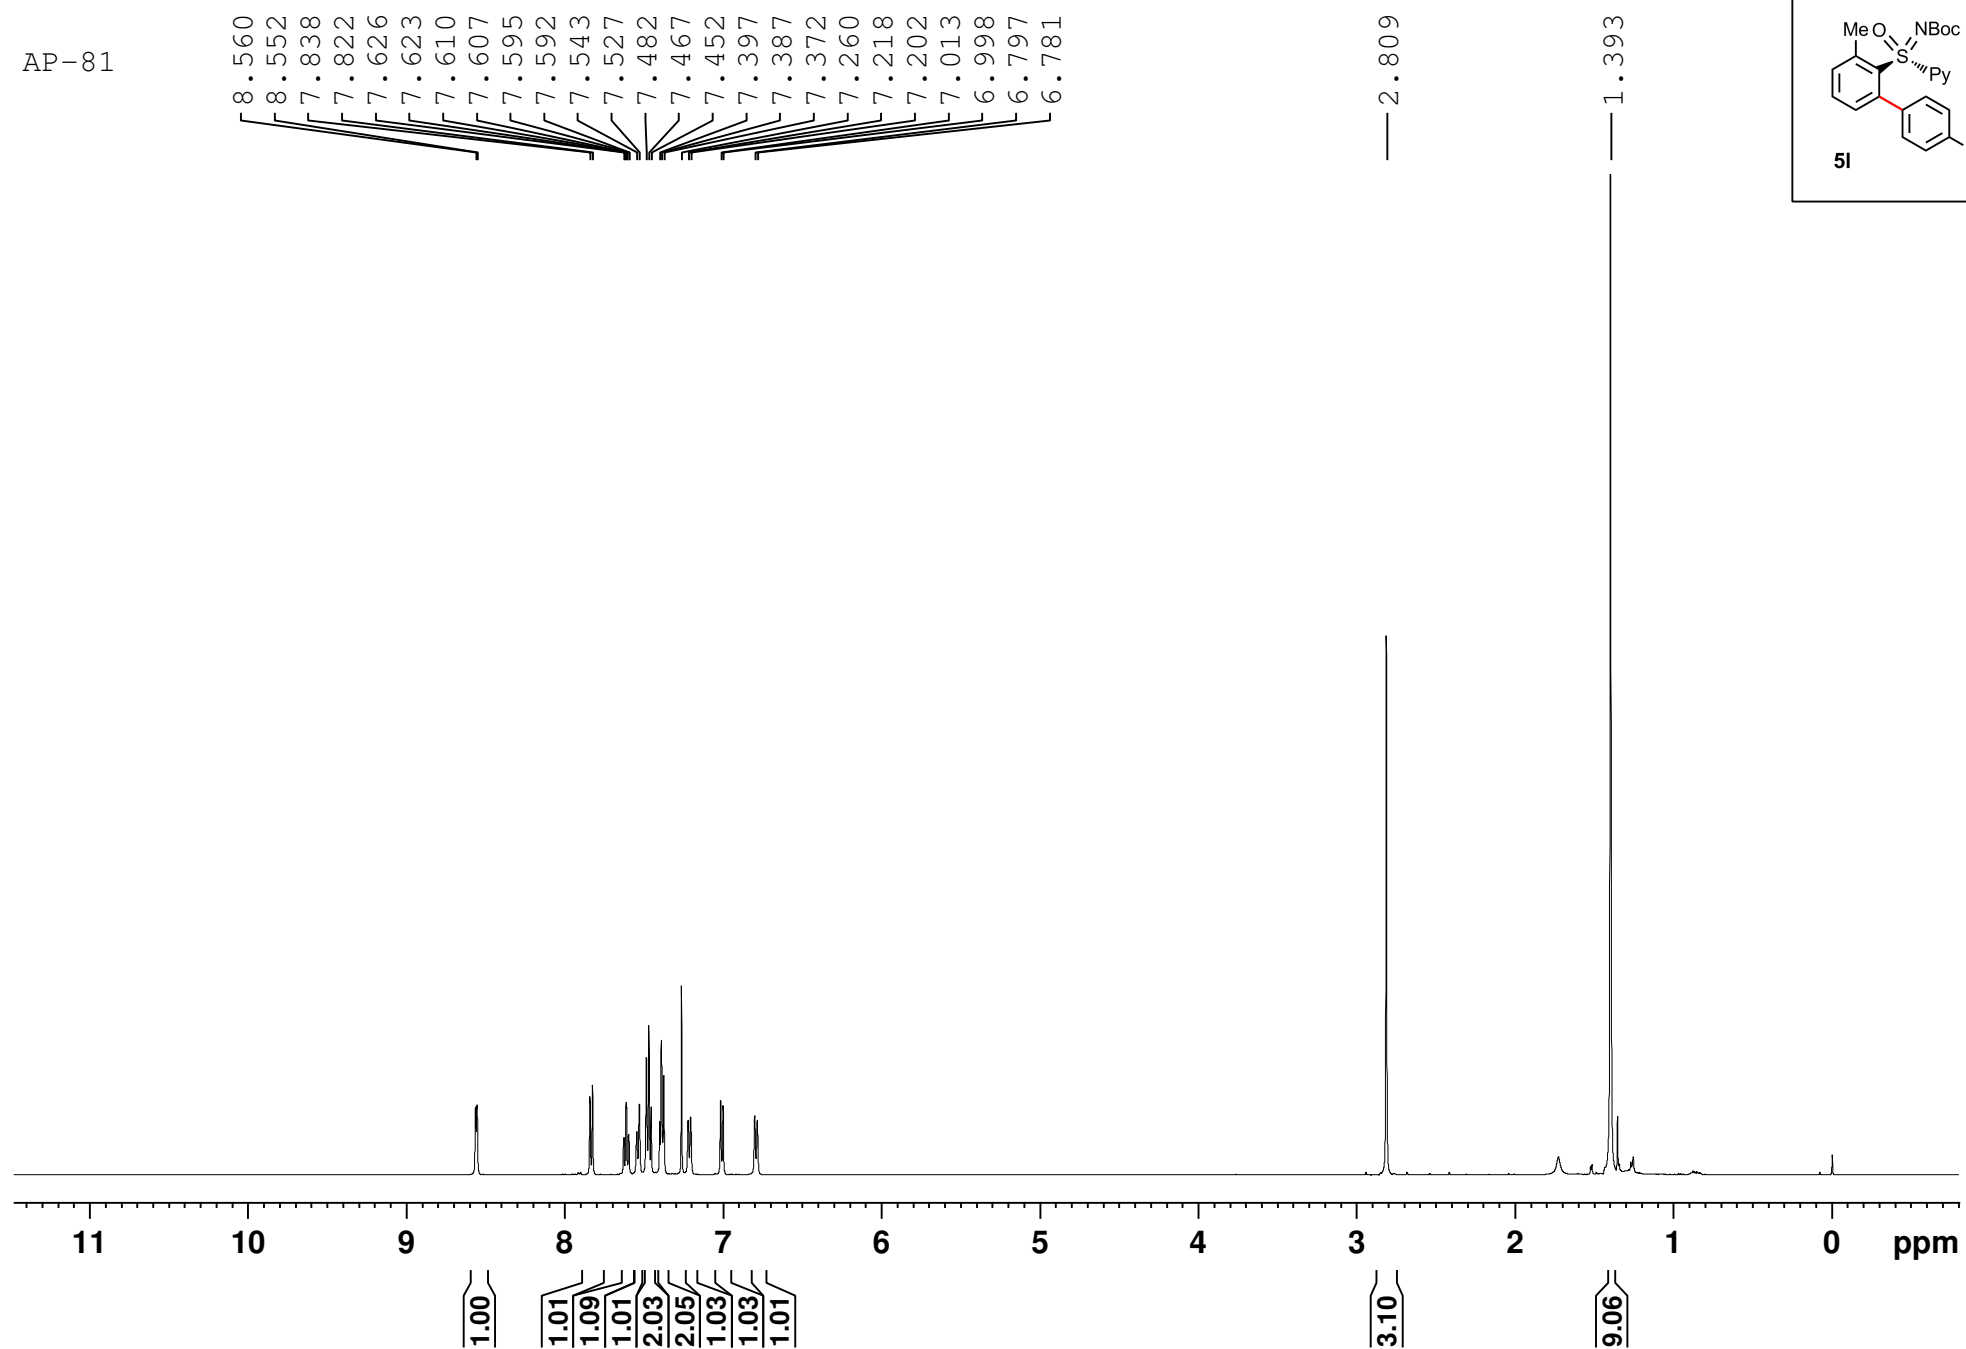



AP-81

157.99  
156.68  
149.82  
143.99  
142.18  
142.10  
137.47  
134.44  
133.36  
132.02  
130.81  
130.04  
129.52  
129.19  
128.90  
128.88  
128.55  
128.09  
126.76  
125.38  
123.85  
123.81  
123.77  
123.74  
122.84  
122.68  
119.98

80.47  
77.31  
77.00  
76.68

27.98  
23.09

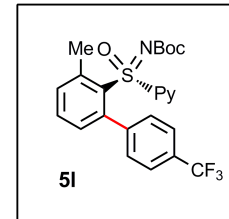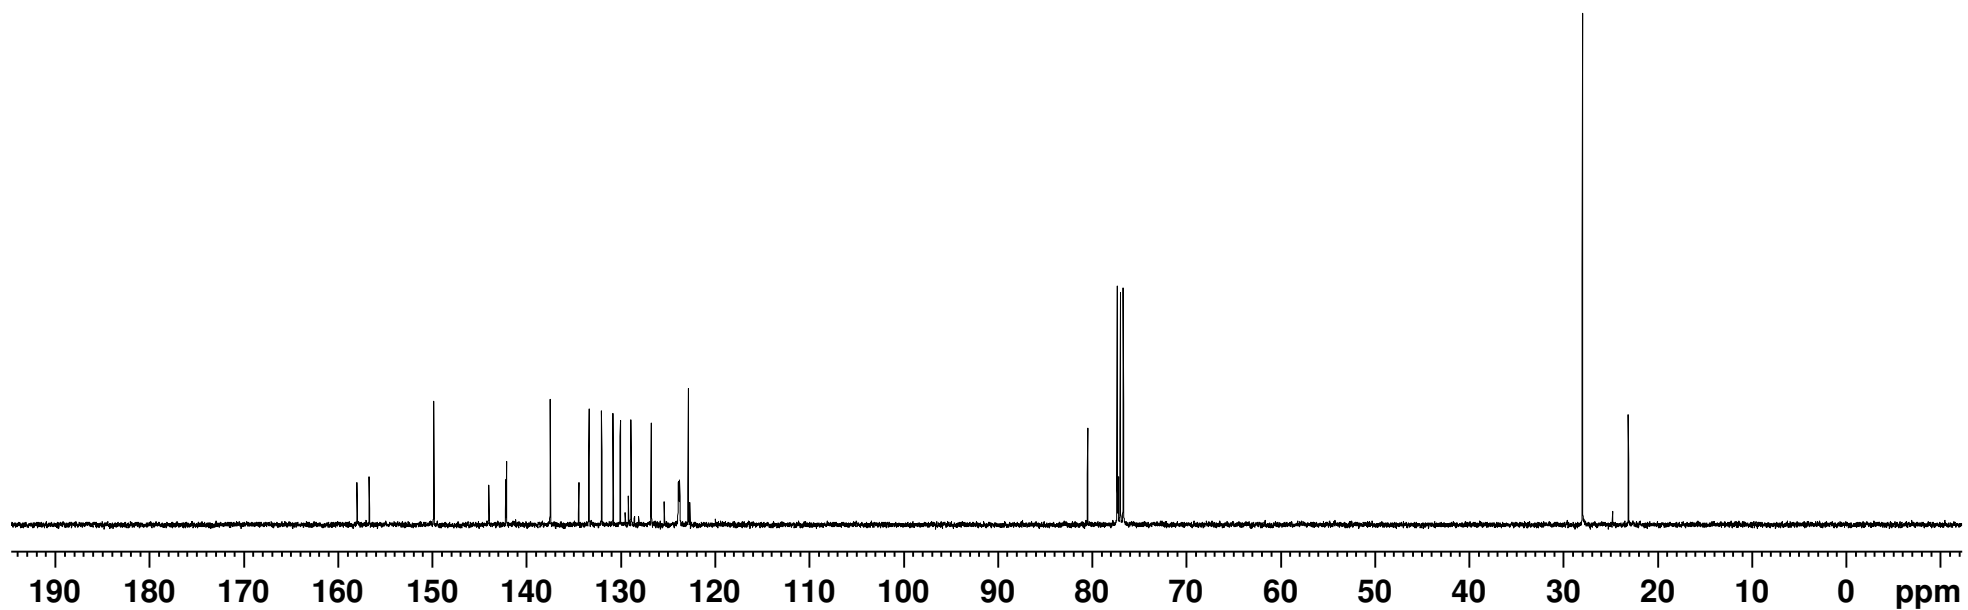

AP-81

— 62.49

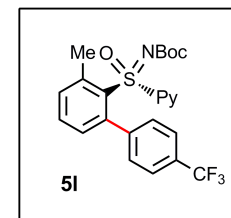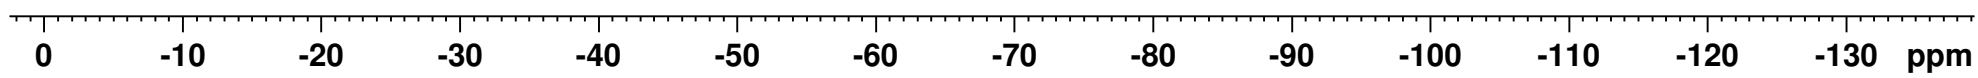

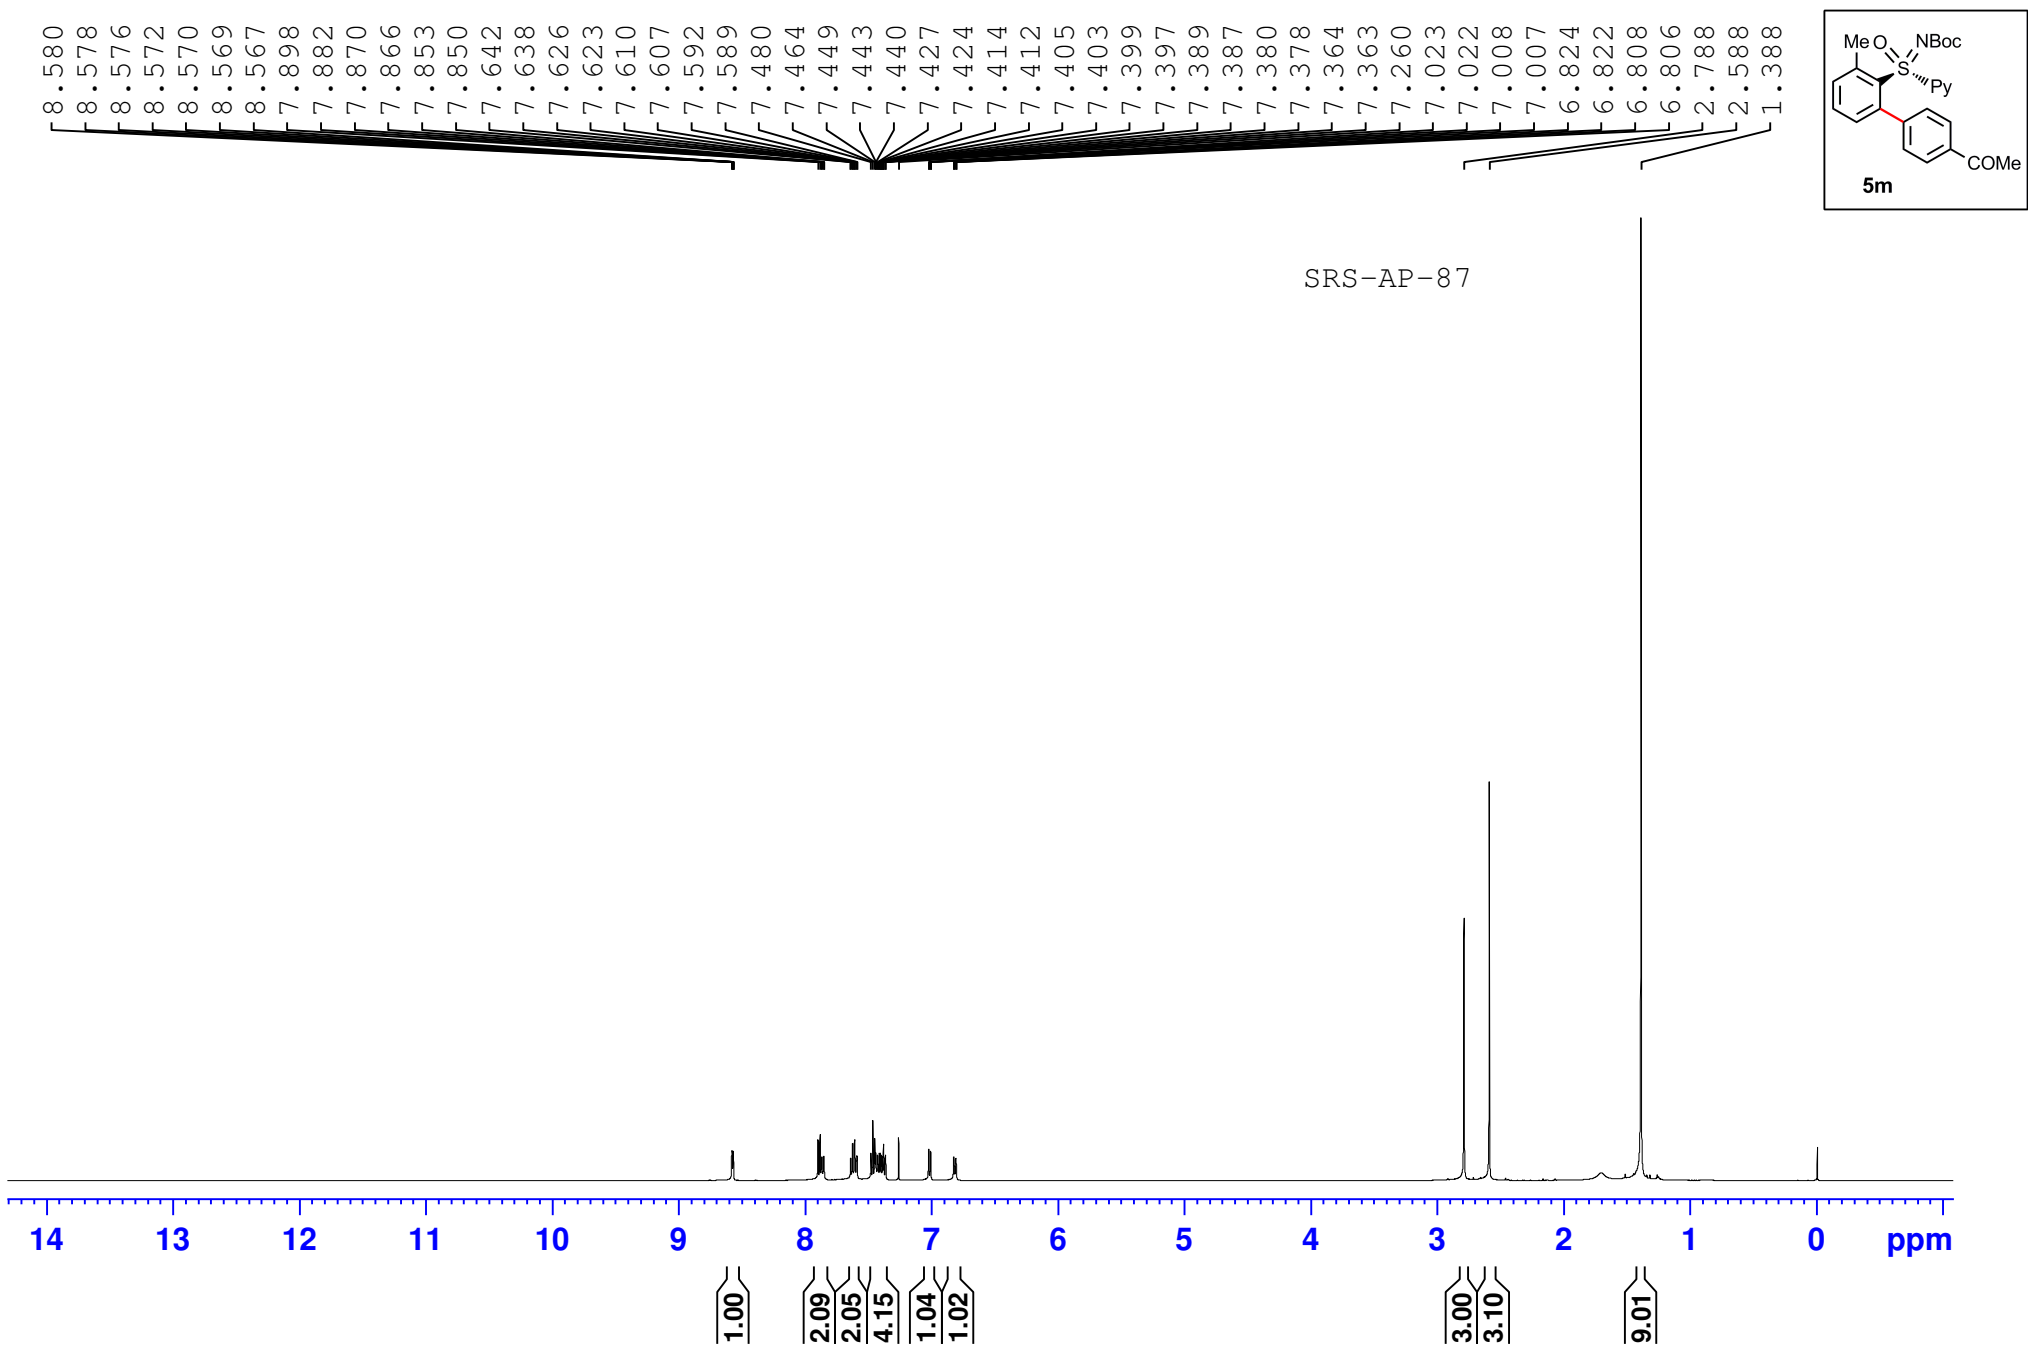

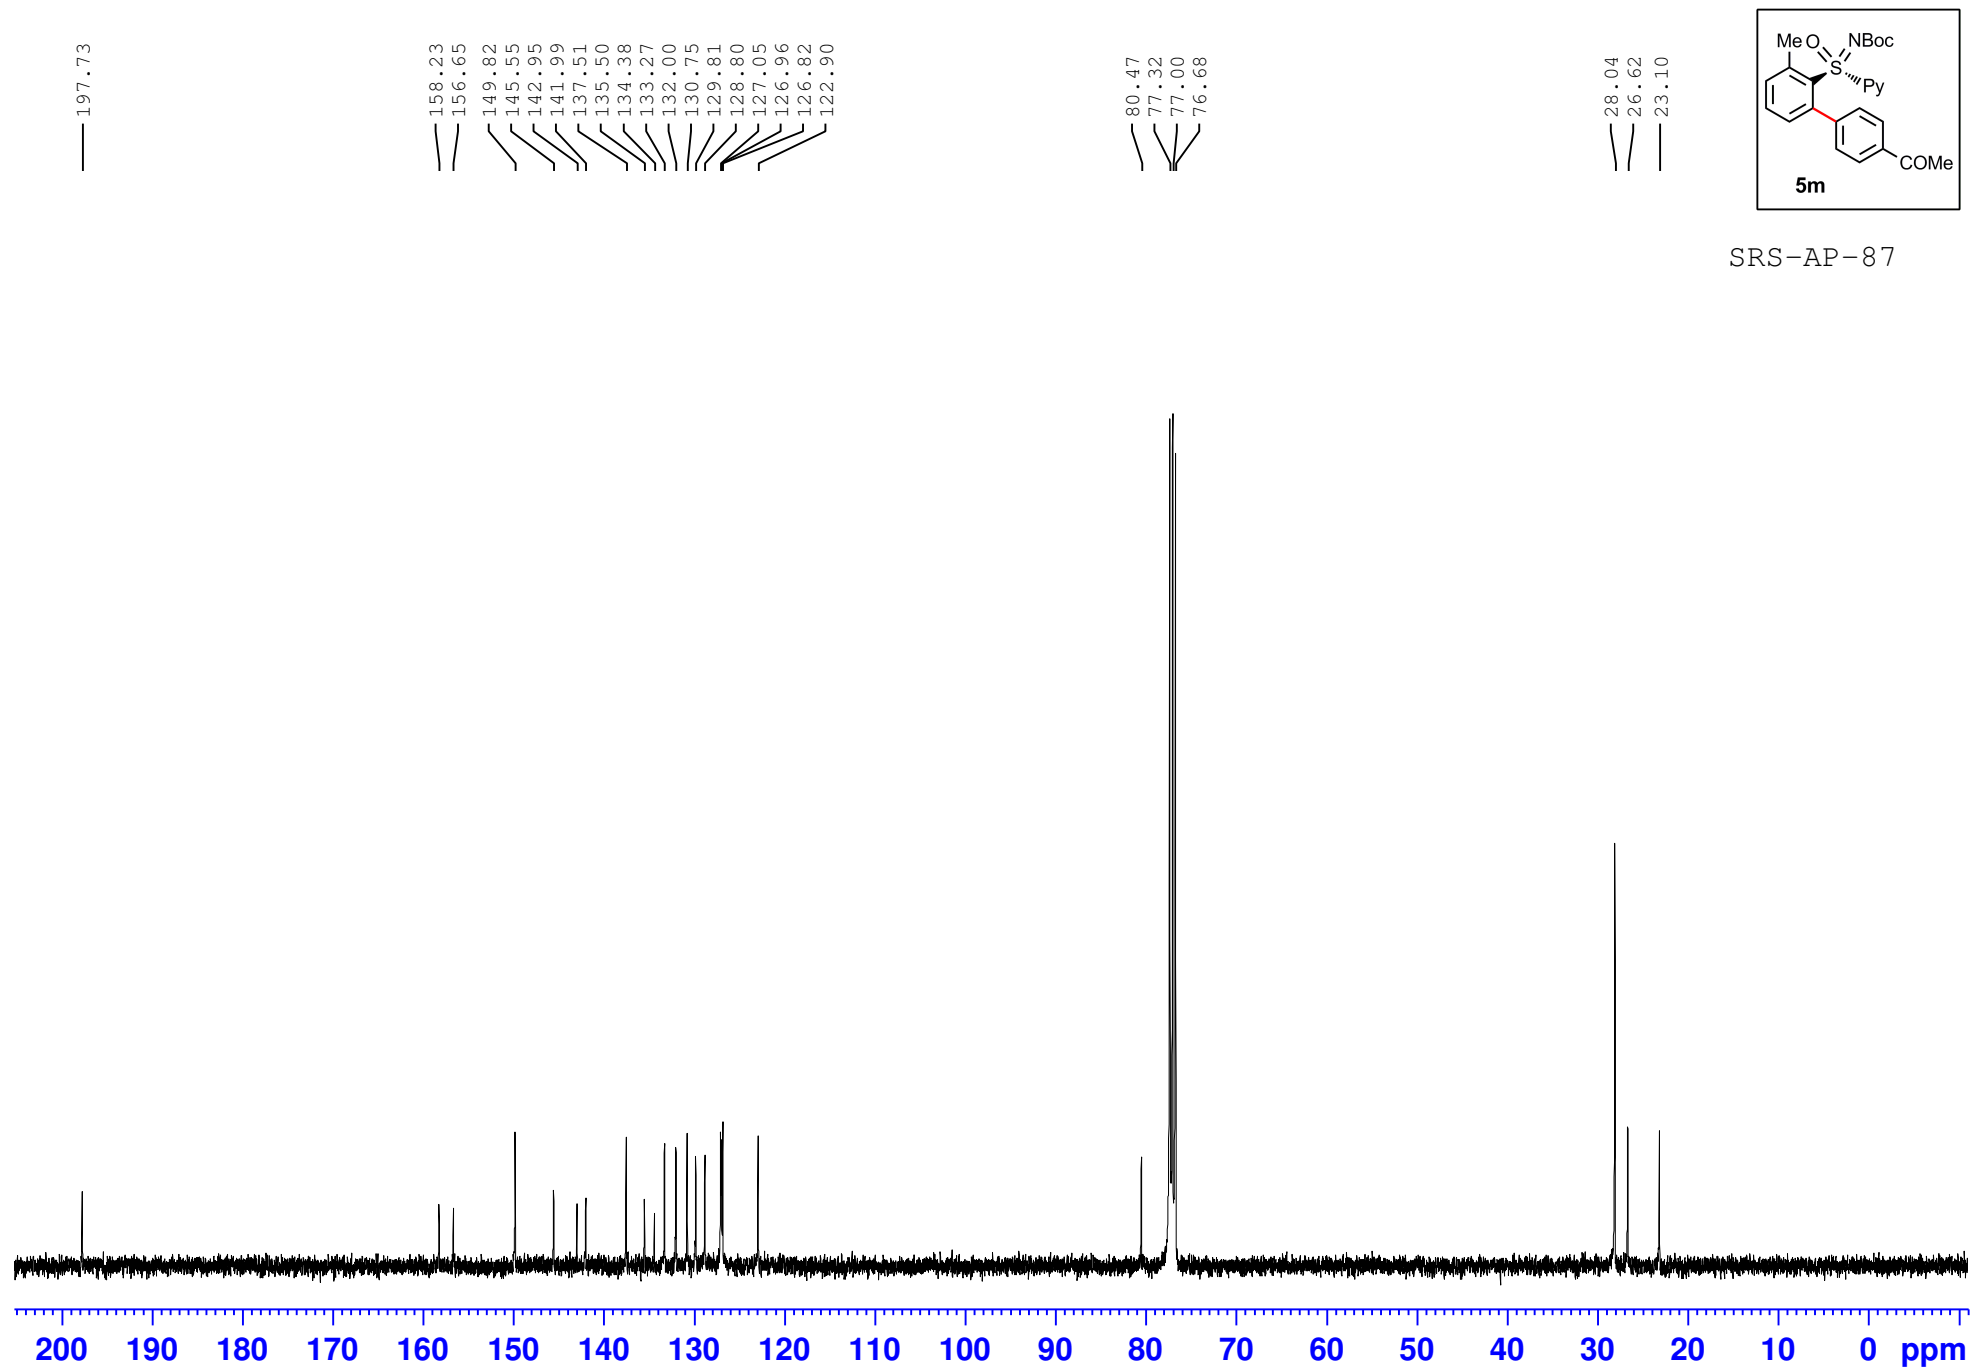

SRS-AP-87

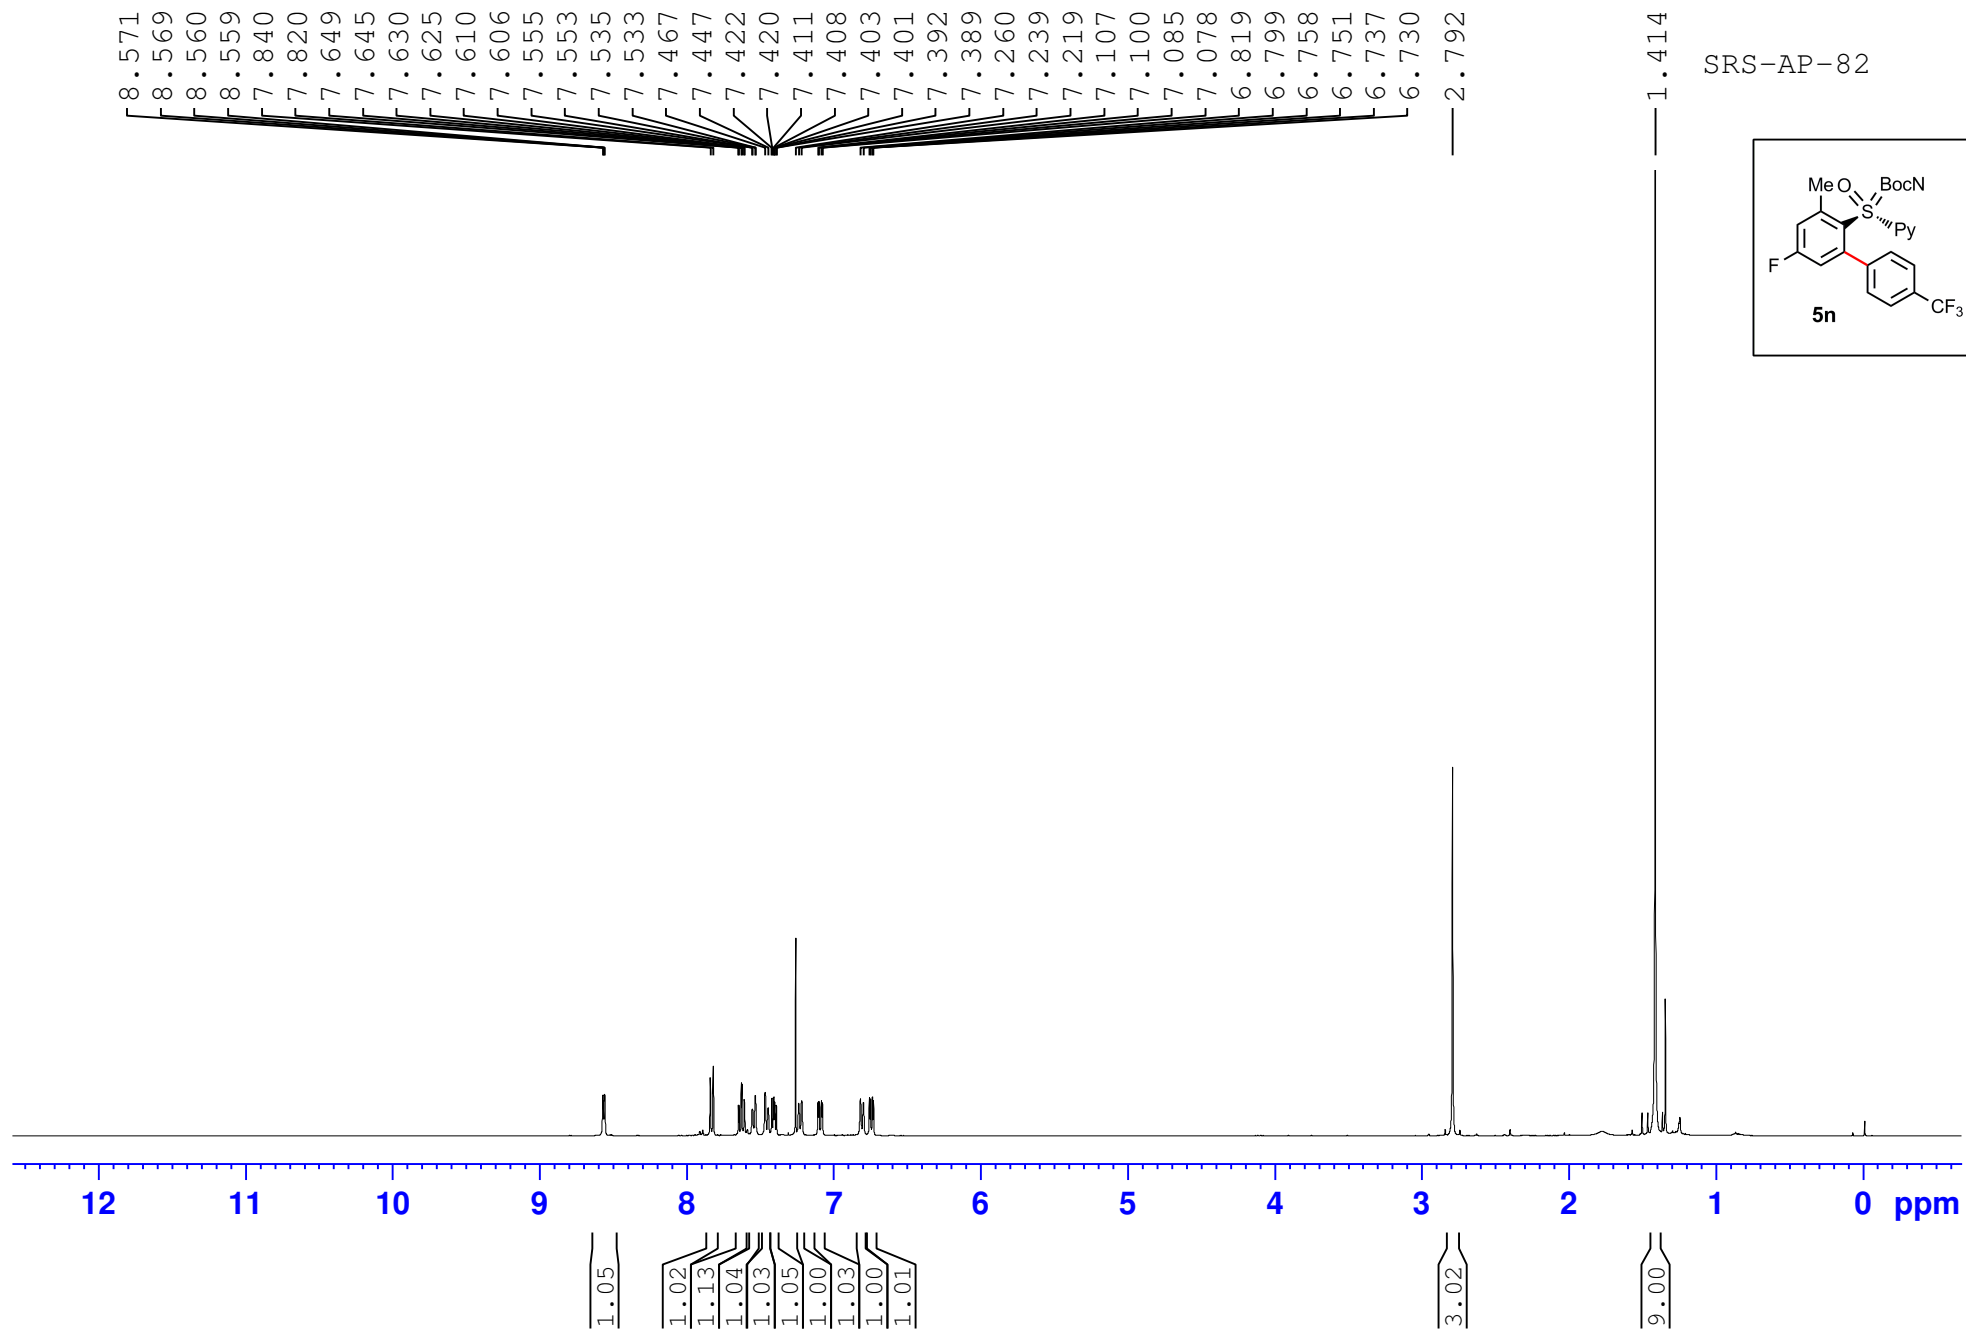

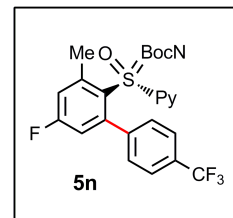

164.61  
162.06  
157.93  
156.72  
149.85  
145.93  
145.83  
145.34  
145.25  
142.99  
137.61  
134.93  
130.40  
130.37  
129.99  
129.72  
129.67  
129.35  
129.02  
128.72  
127.99  
126.91  
125.29  
124.04  
124.00  
123.97  
123.93  
122.80  
122.58  
120.00  
119.79  
117.96  
117.74

80.59  
77.31  
77.00  
76.68

28.02  
24.77  
23.36

SRS-AP--82

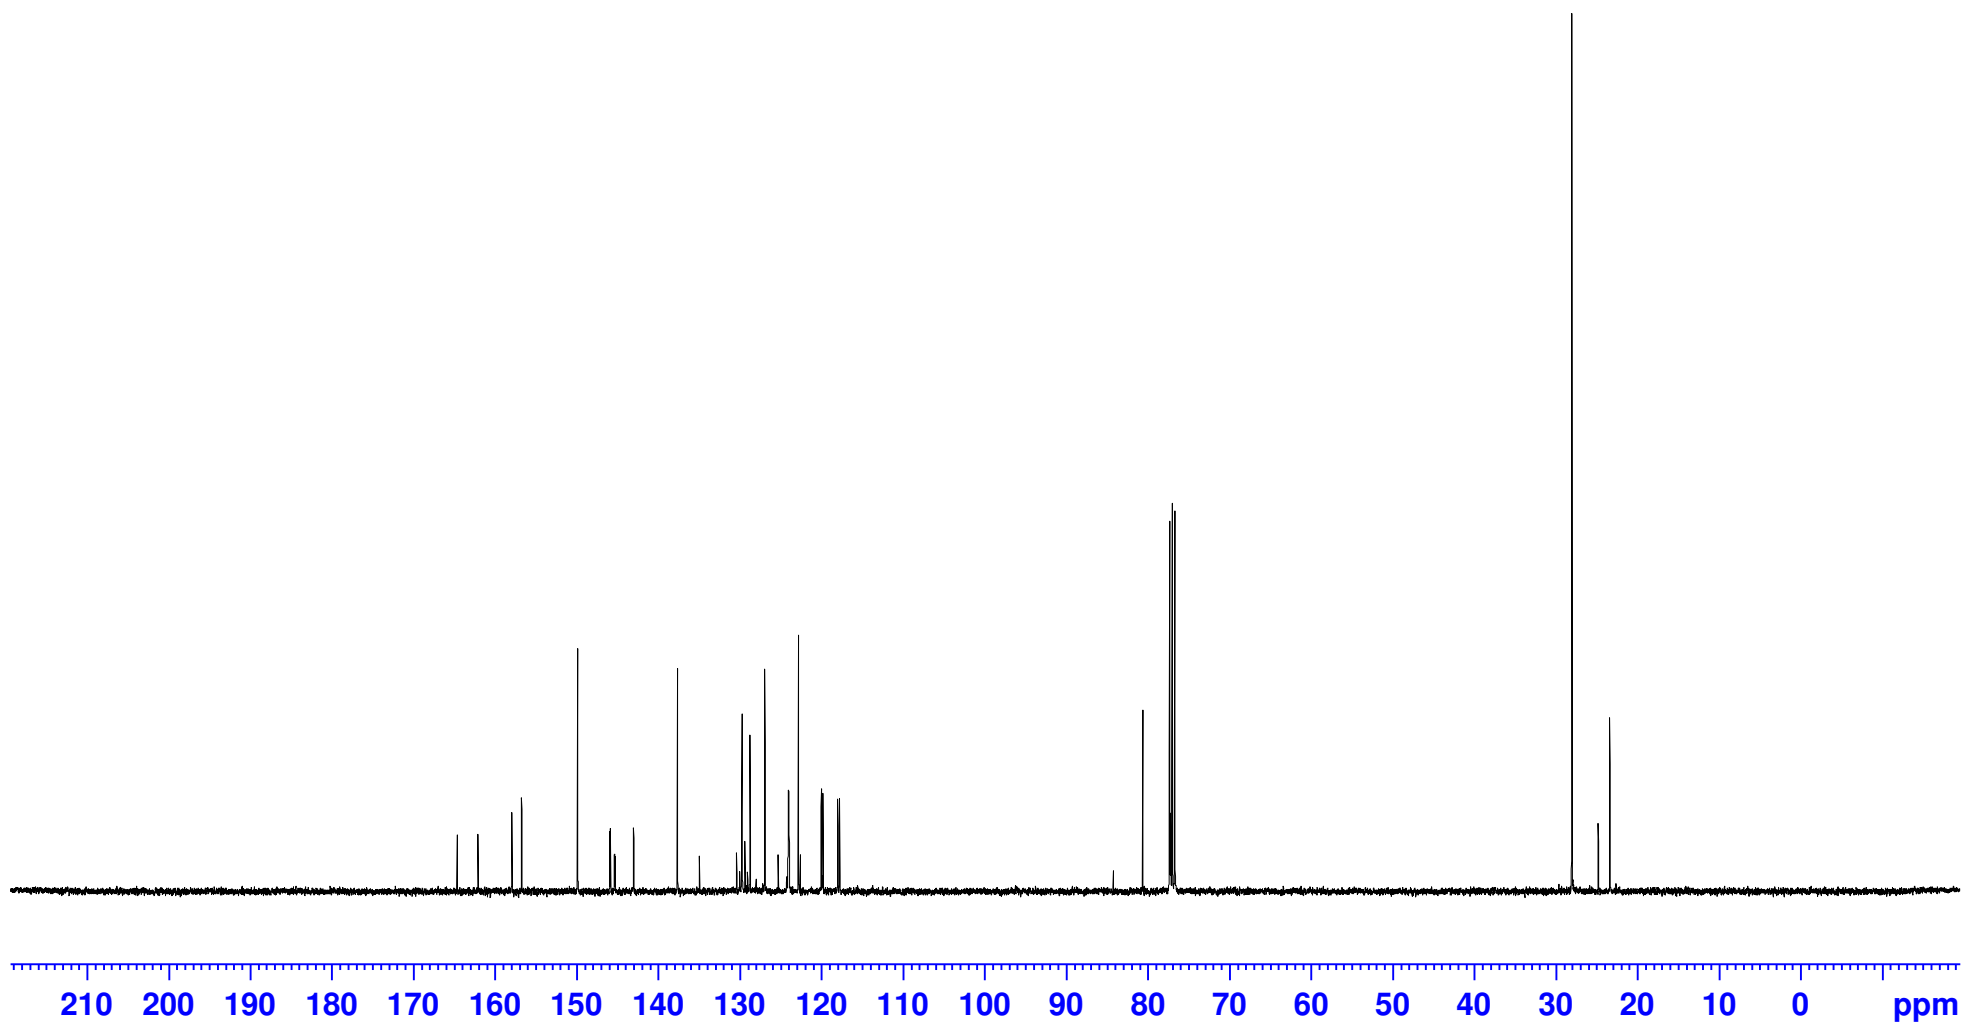

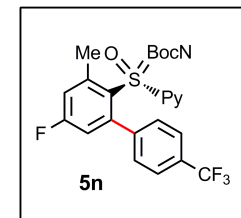

SRS-AP--82

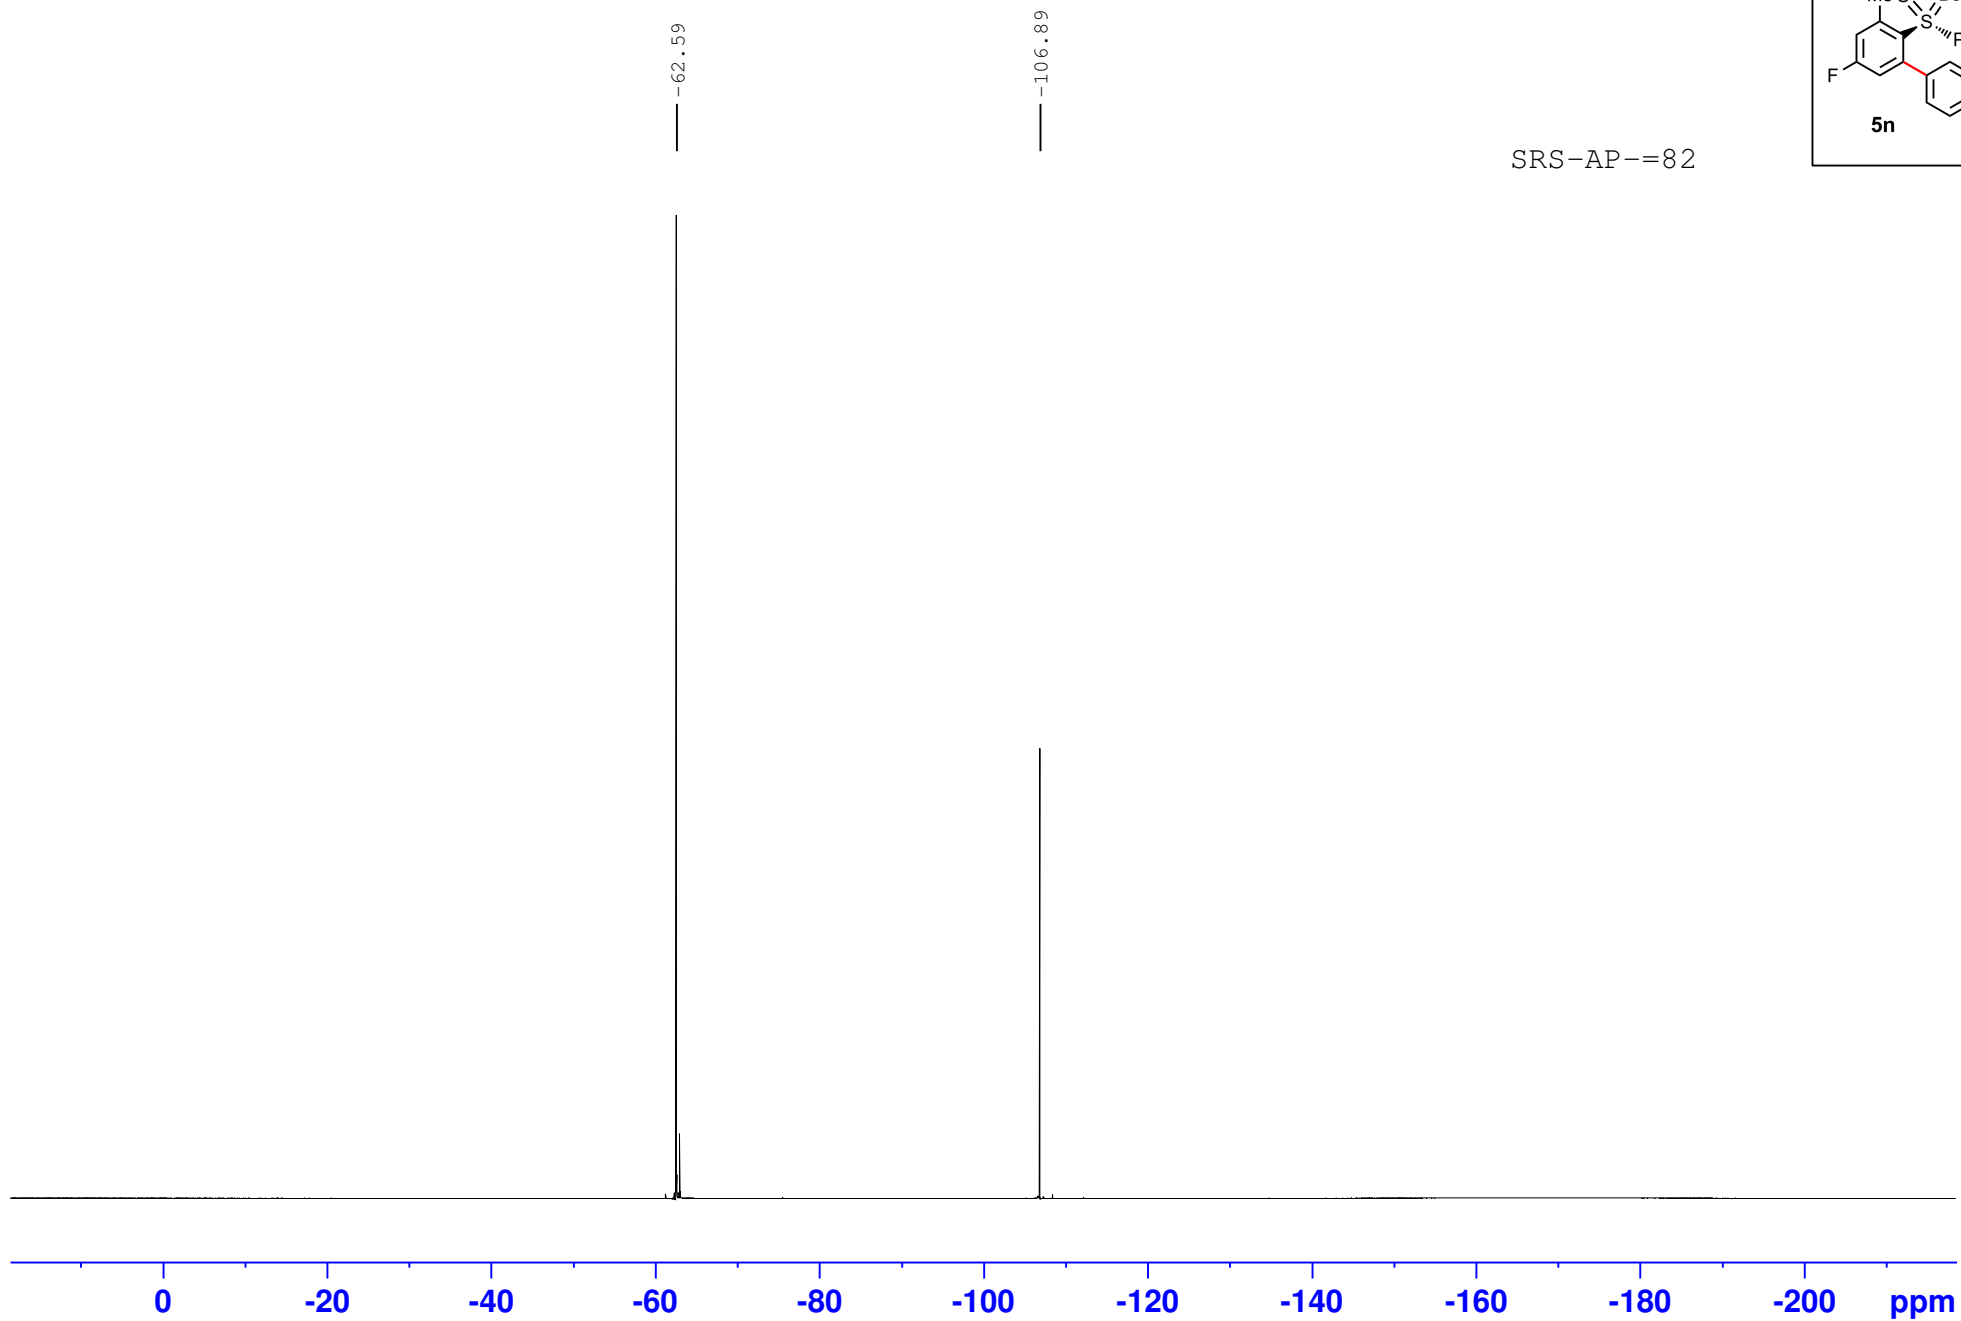

8.482  
8.473  
7.599  
7.597  
7.595  
7.593  
7.585  
7.583  
7.581  
7.580  
7.578  
7.528  
7.523  
7.519  
7.421  
7.405  
7.389  
7.370  
7.361  
7.355  
7.345  
7.260  
7.116  
7.111  
7.099  
7.095

— 3.831

— 2.532

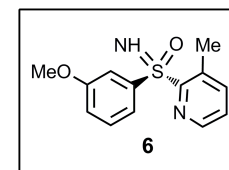

K -9-119 R

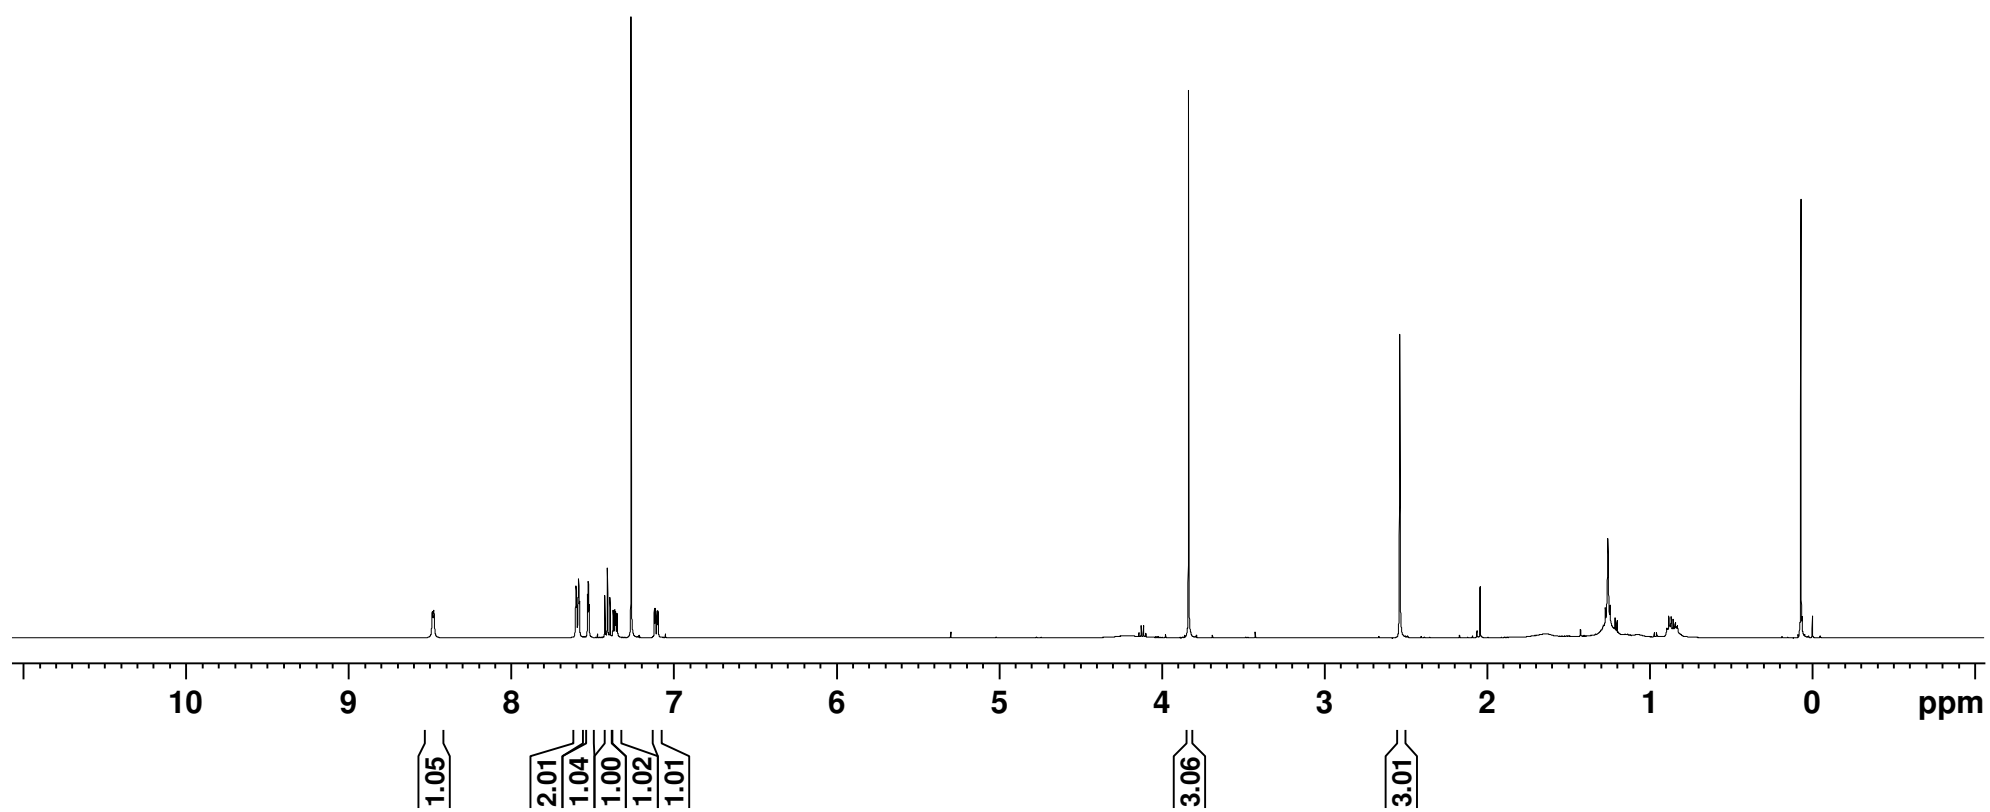



K -9-119 R

159.73  
156.97

146.18  
141.89  
141.52

133.25  
129.72  
126.76

121.48  
119.59  
113.59

77.25  
77.00  
76.74

55.67

19.23

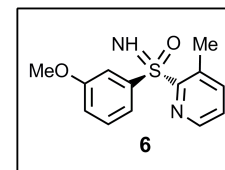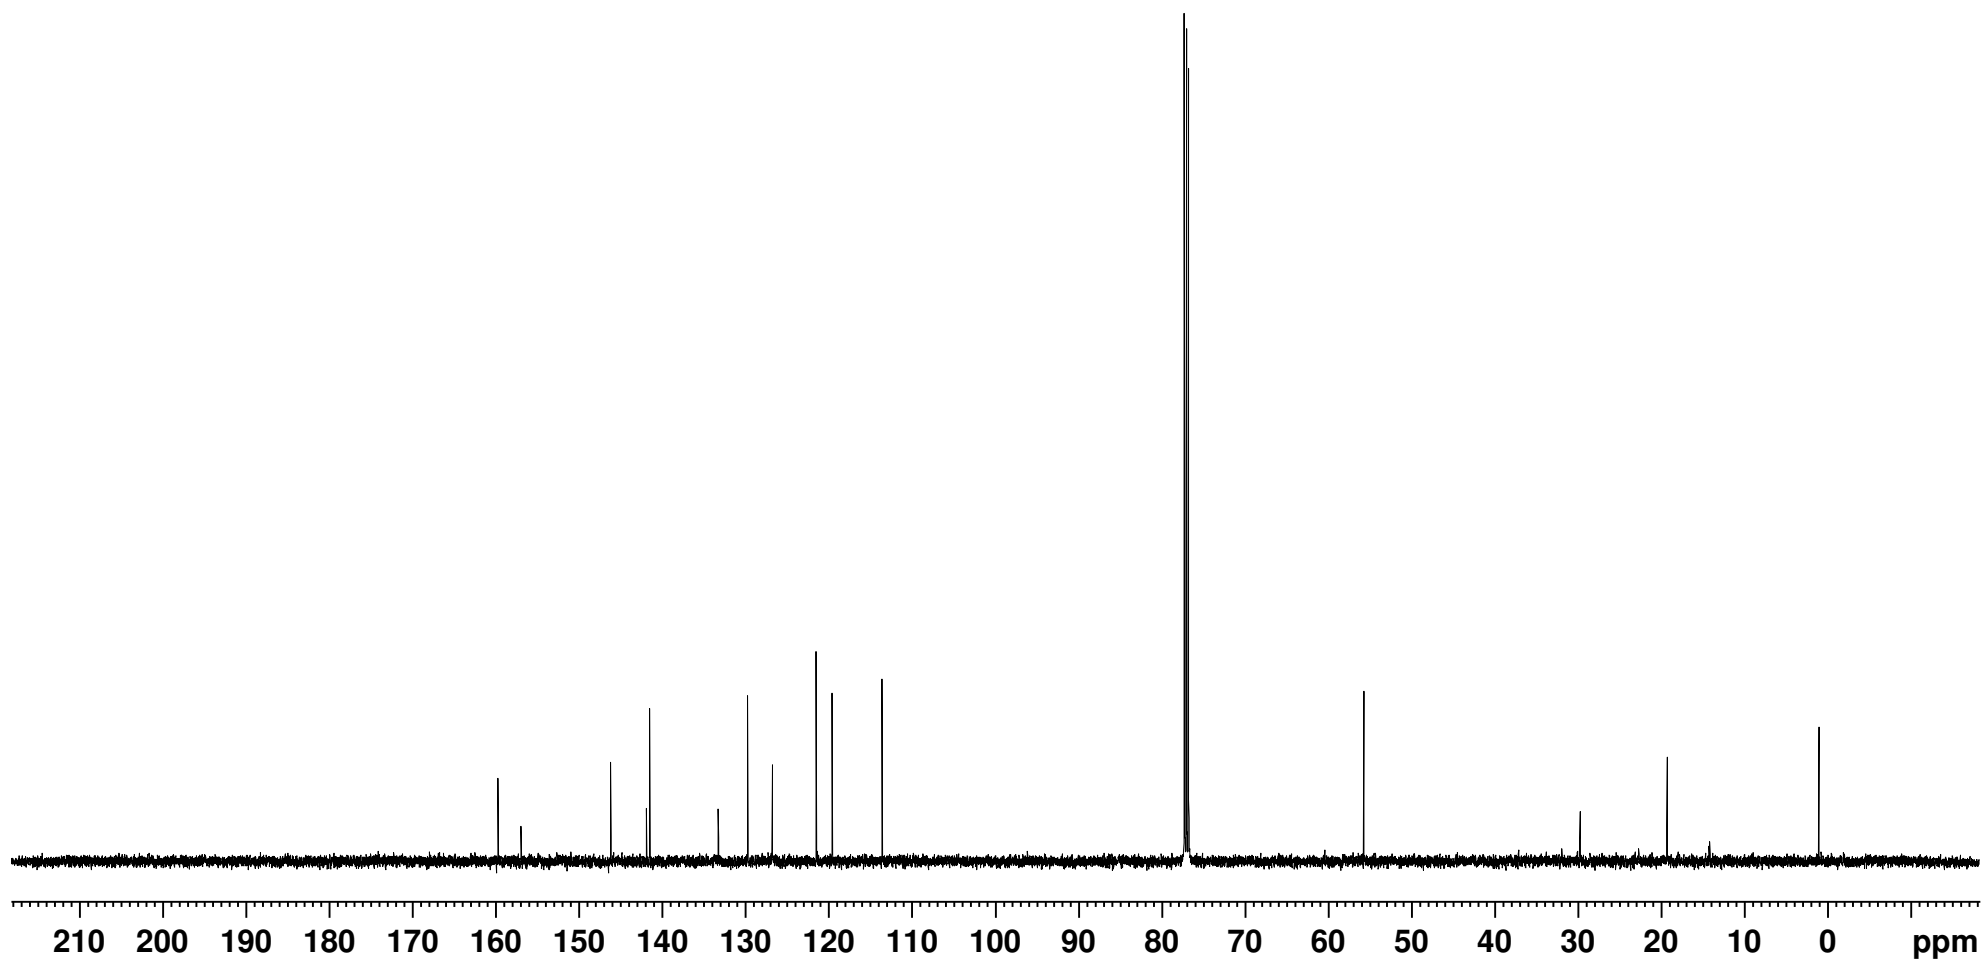

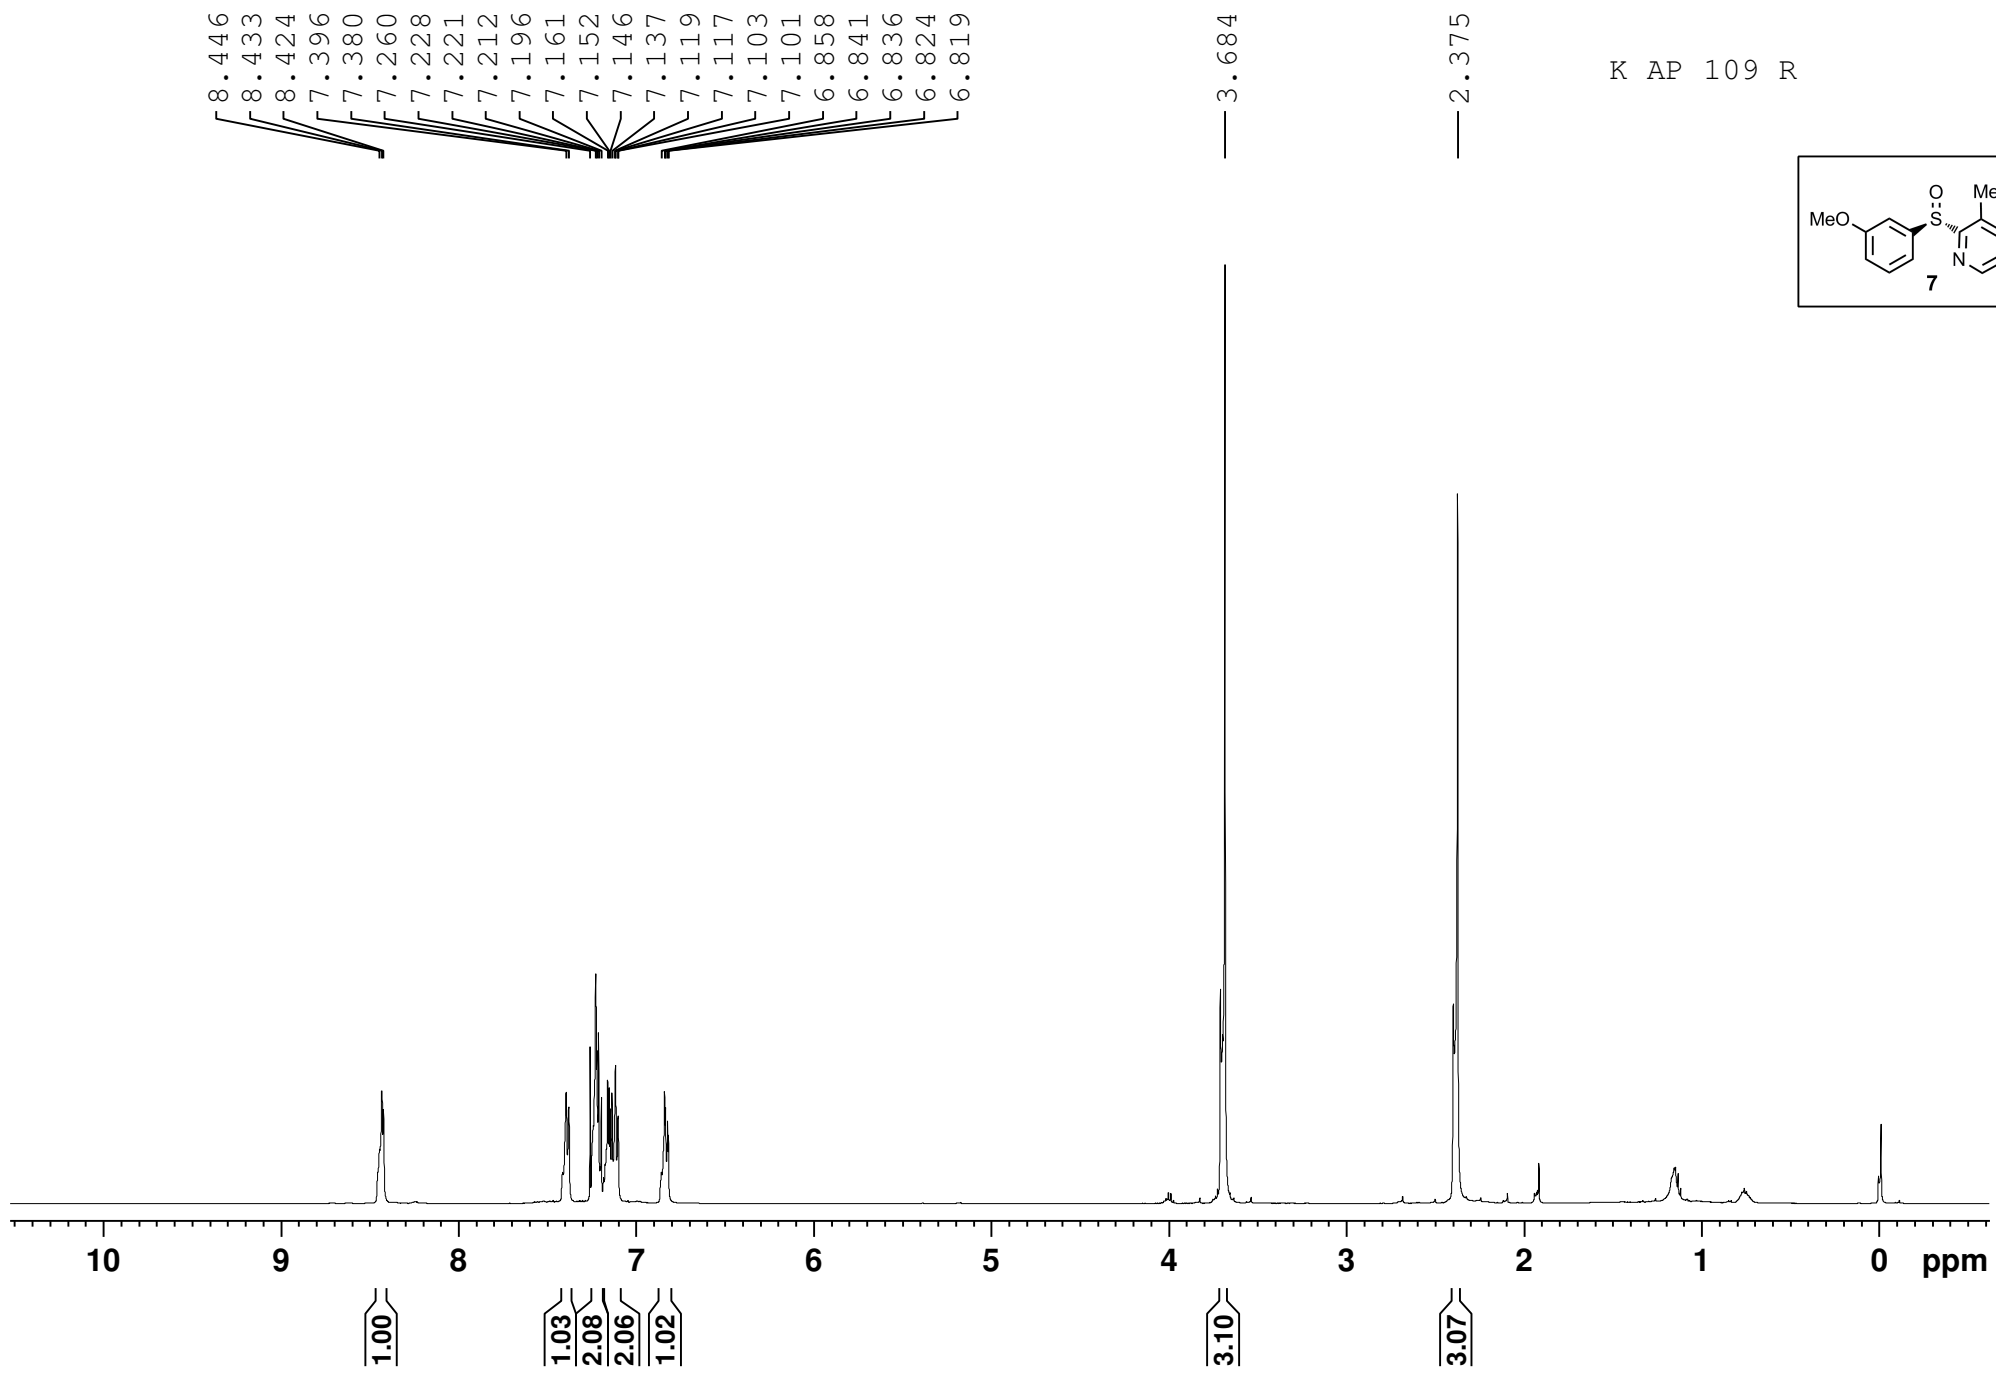

K AP 109 R

K AP 109 R

160.47  
159.93

147.53  
144.26

139.85

132.88  
129.71

125.03

117.04  
116.97

109.39

77.25  
77.00  
76.74

55.20

16.47

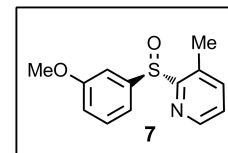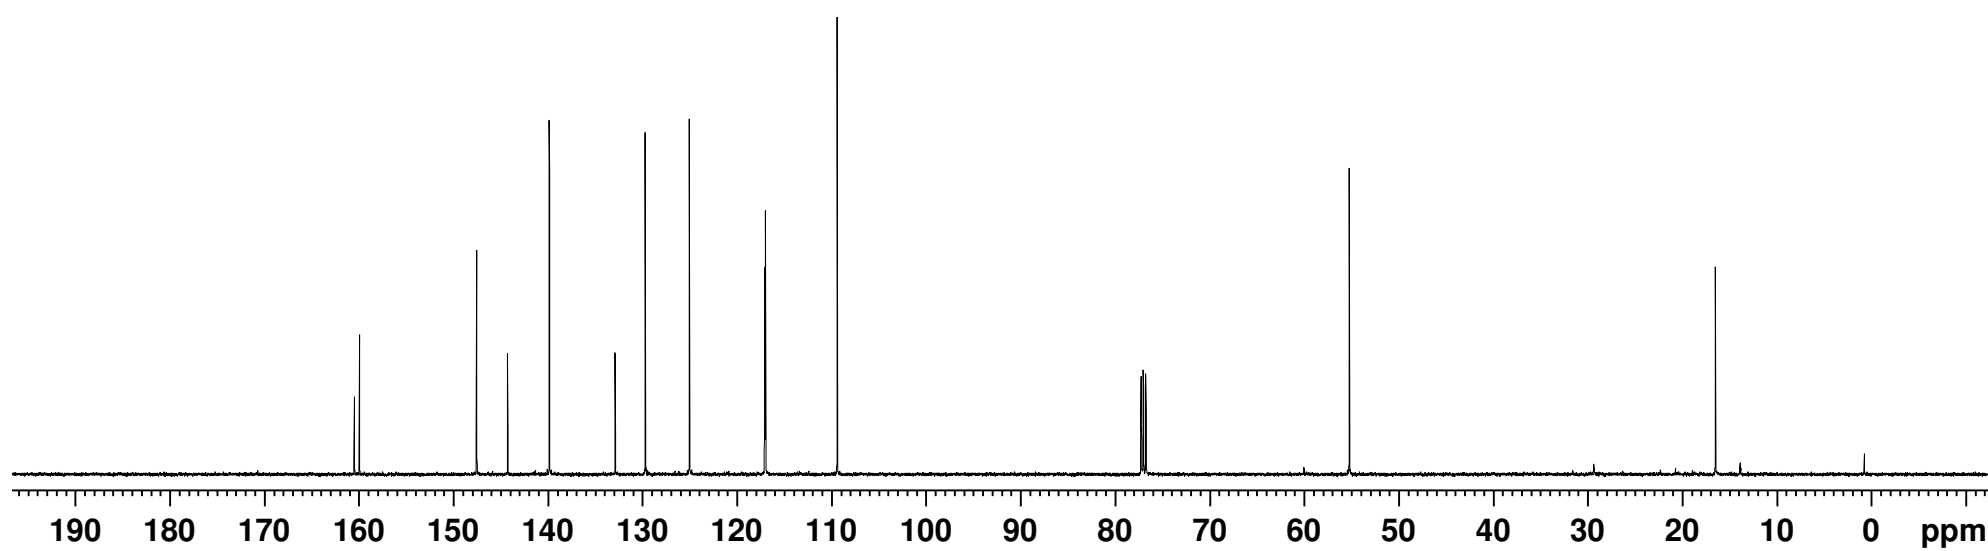

8.322  
8.317  
8.311  
7.639  
7.619  
7.414  
7.393  
7.298  
7.294  
7.286  
7.282  
7.279  
7.275  
7.267  
7.172  
7.171  
7.167  
7.162  
7.146  
7.141  
7.137  
5.307  
5.290  
5.274

3.801  
3.716

2.905  
2.888  
2.658

KALLOL-K 9 95 -2

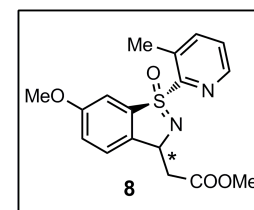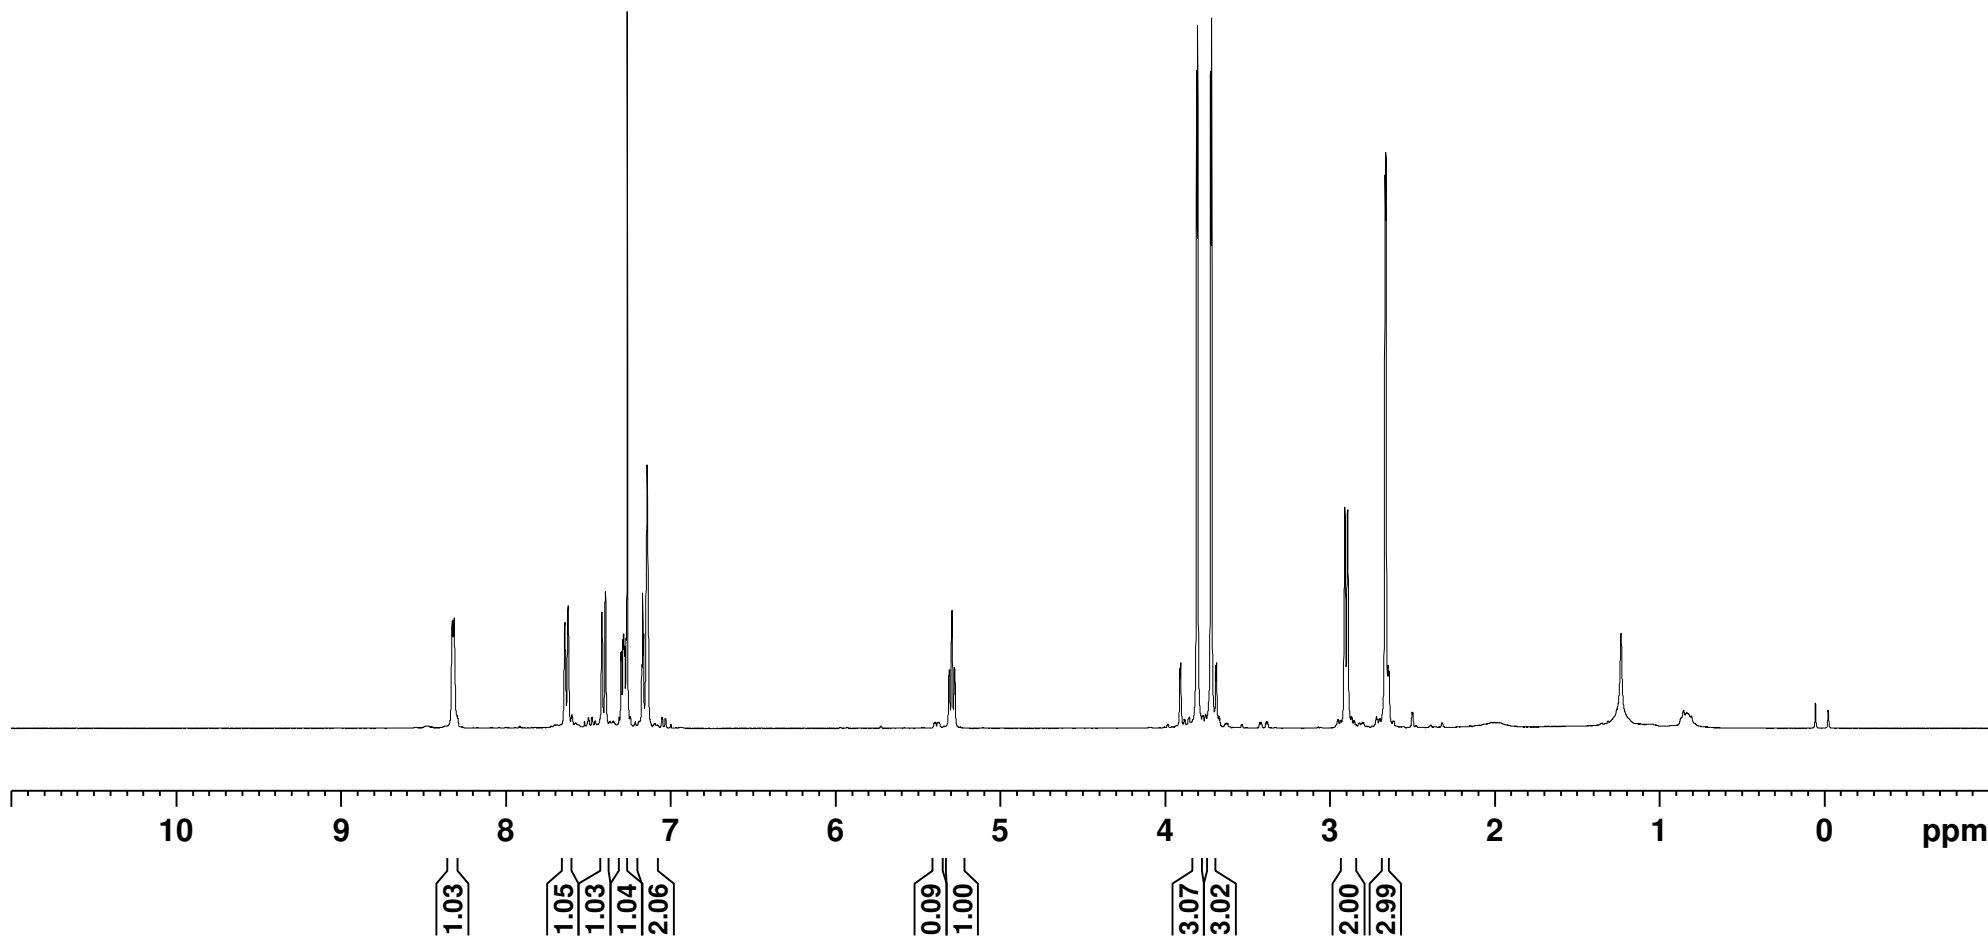

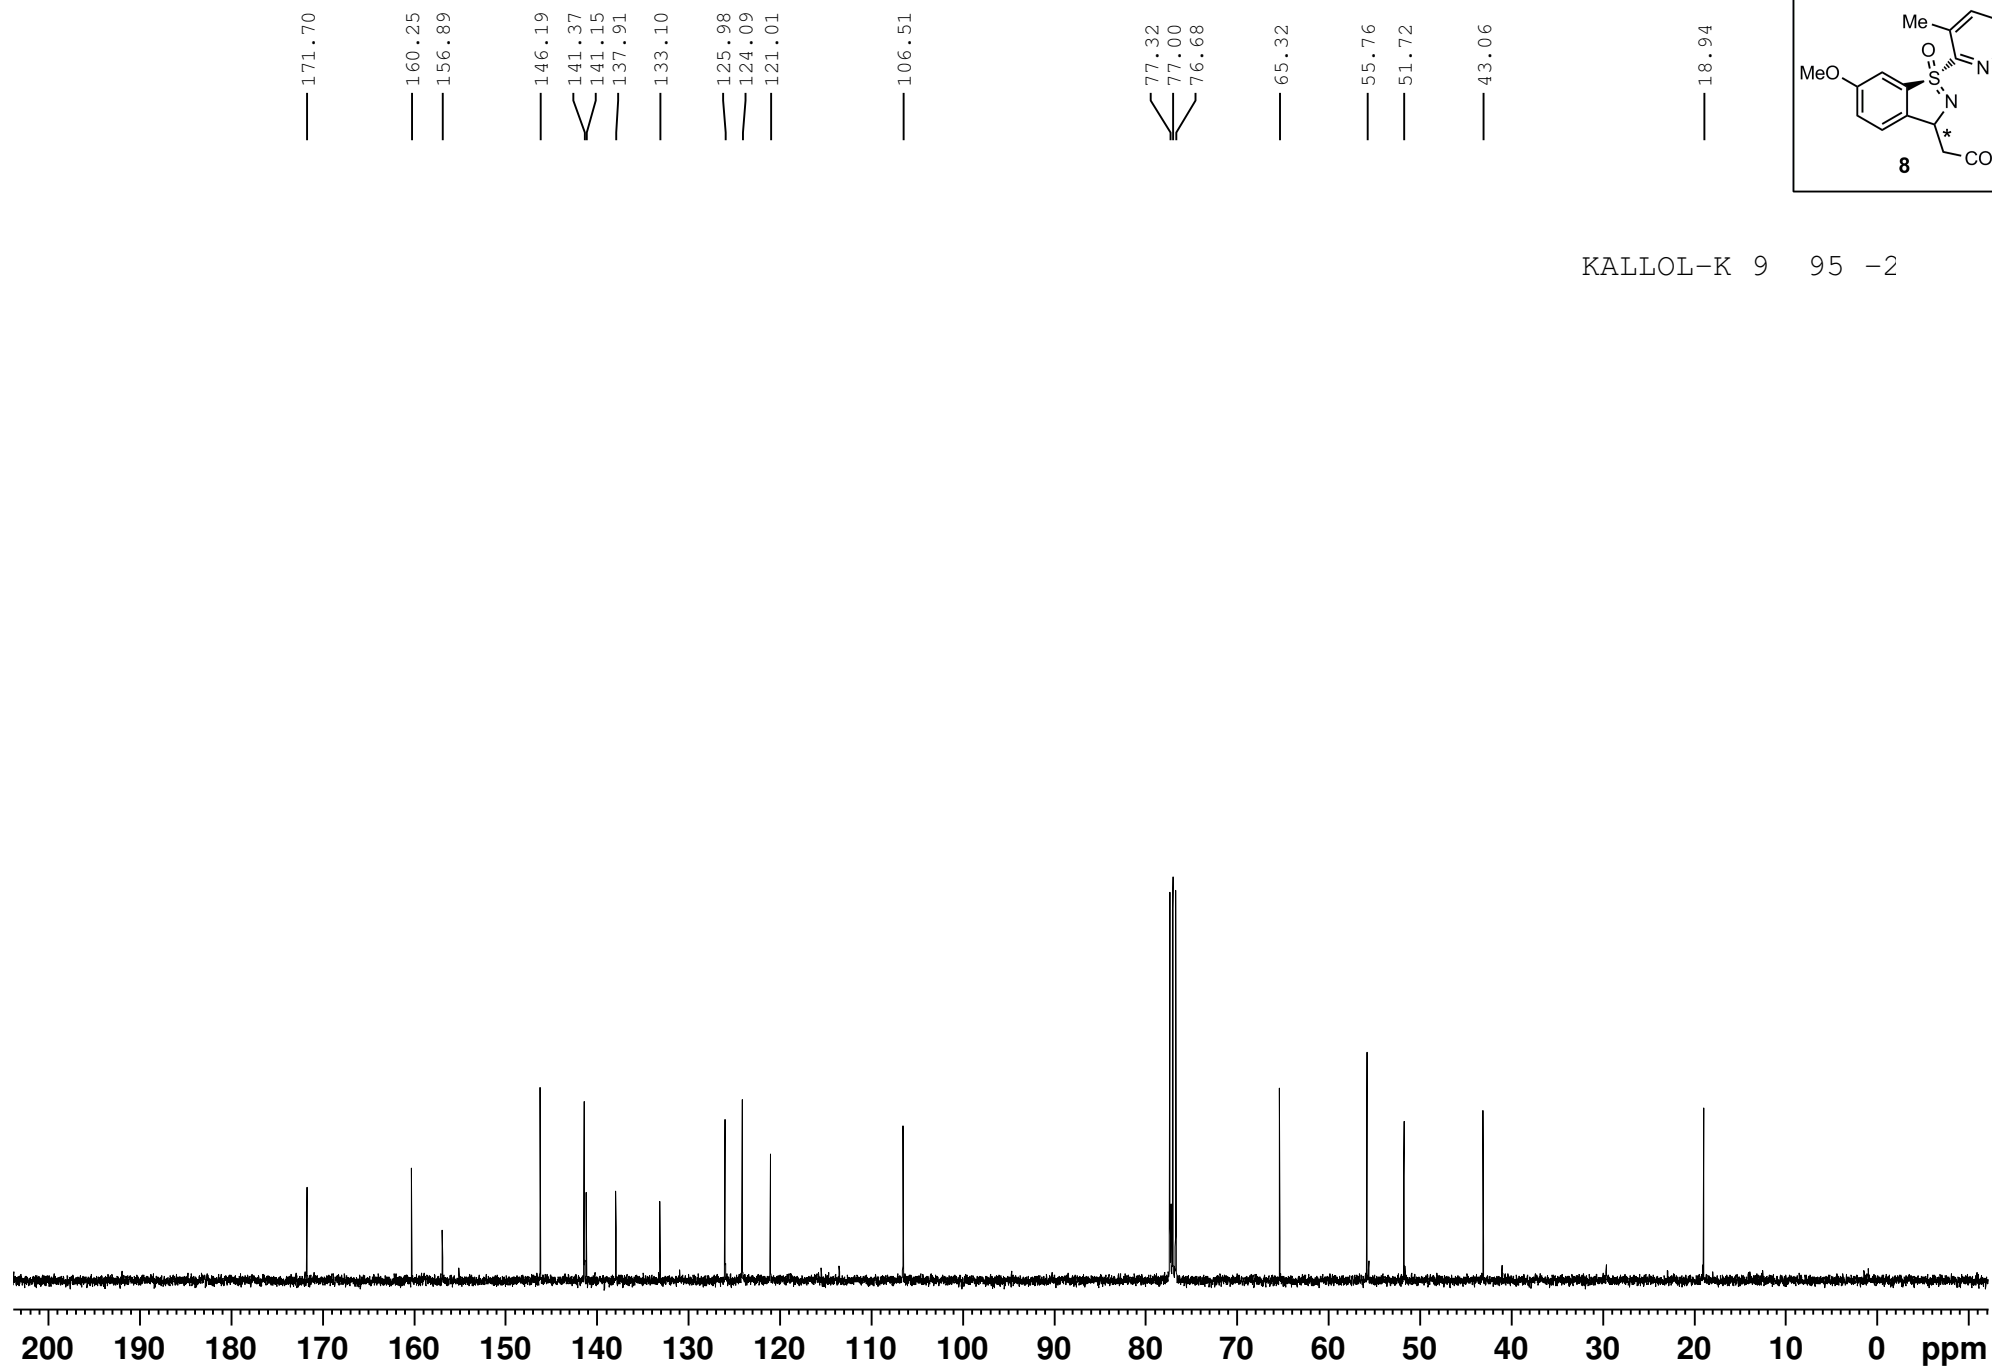

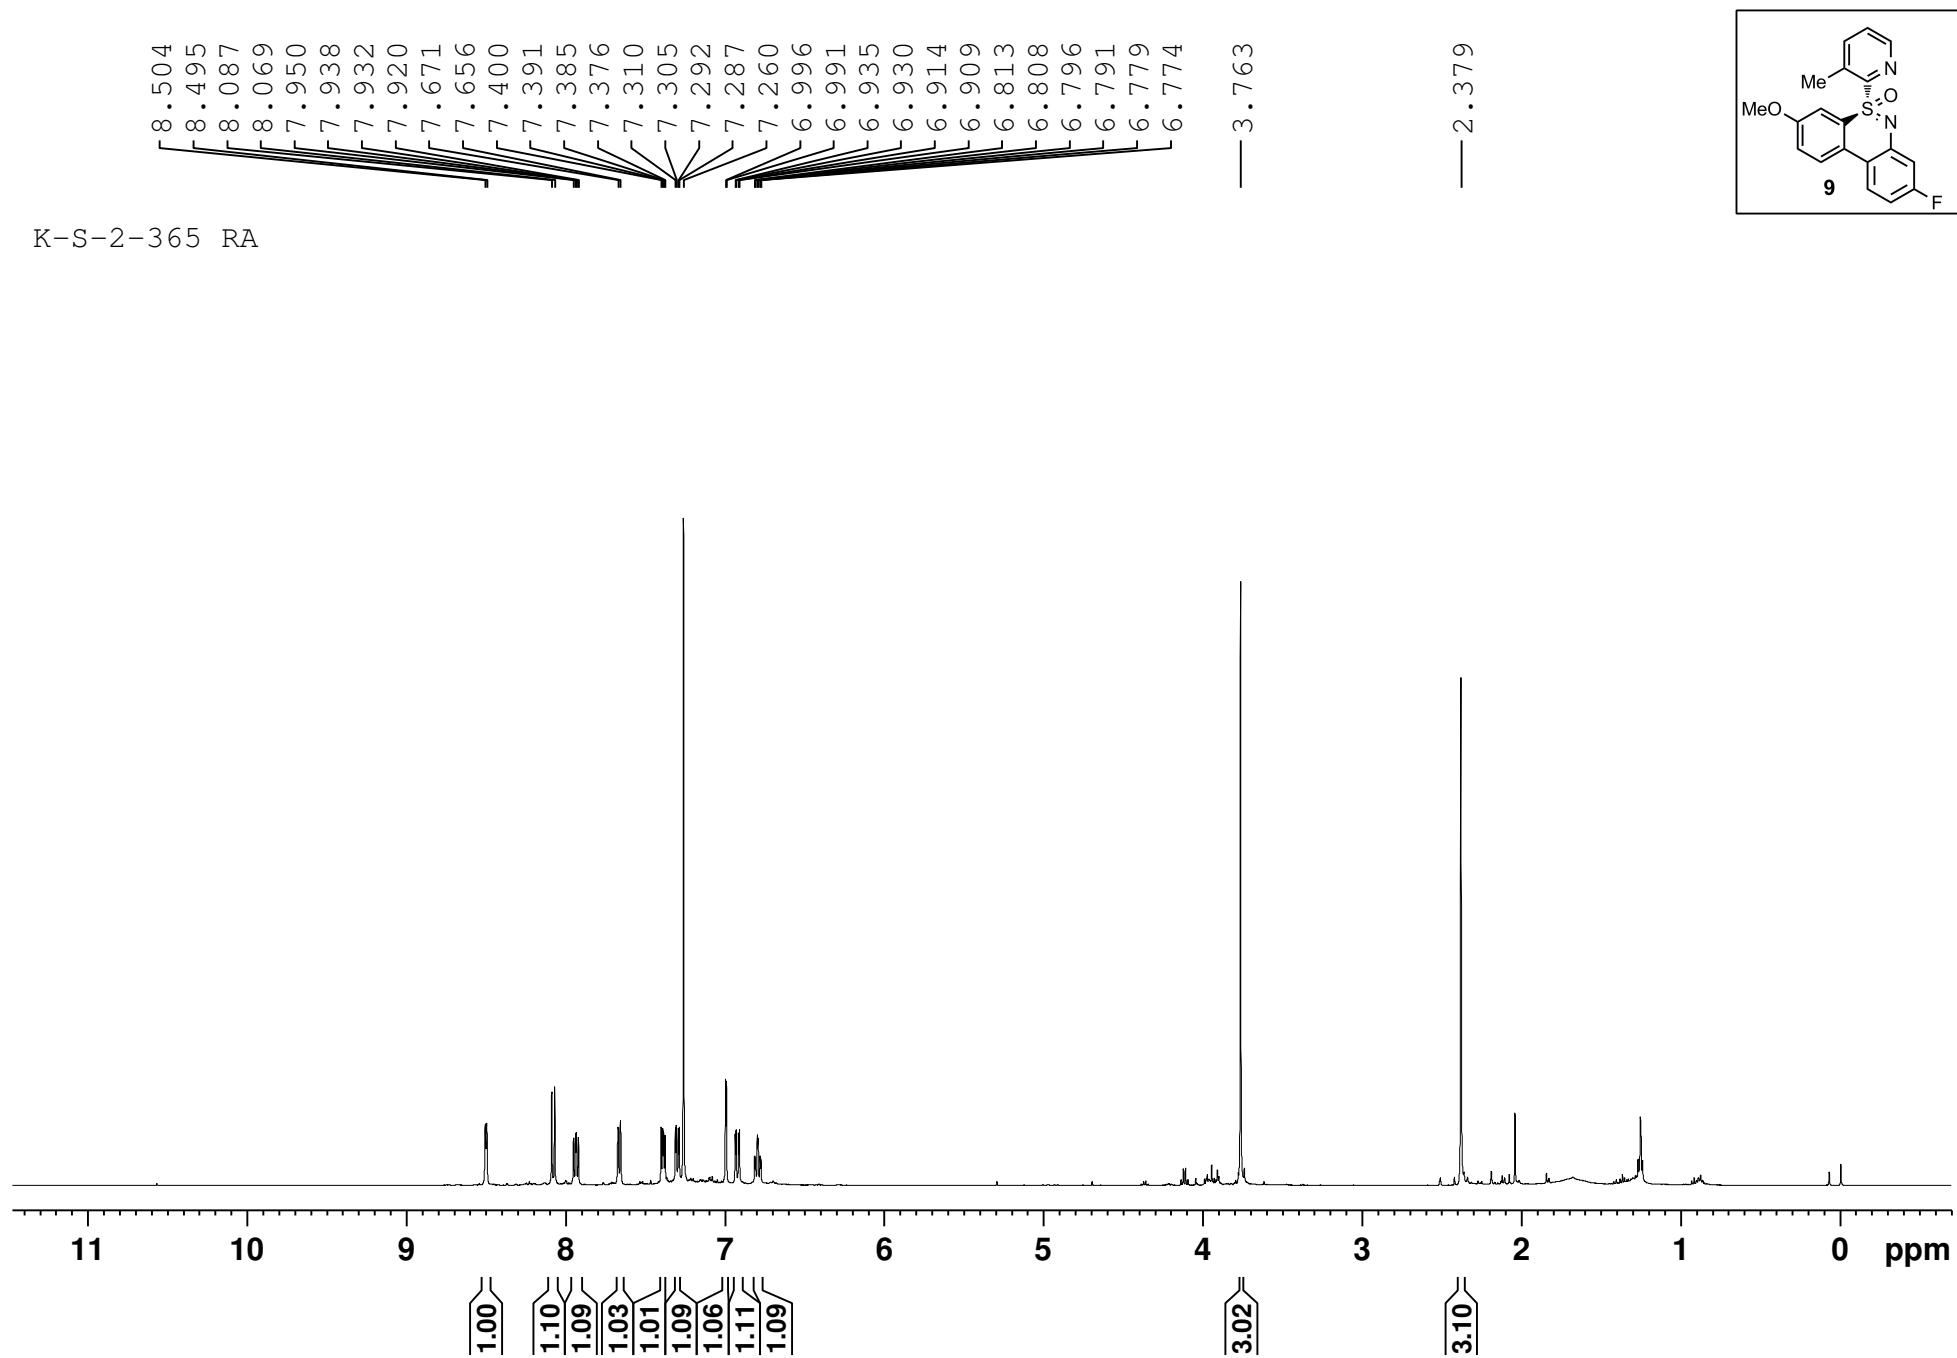

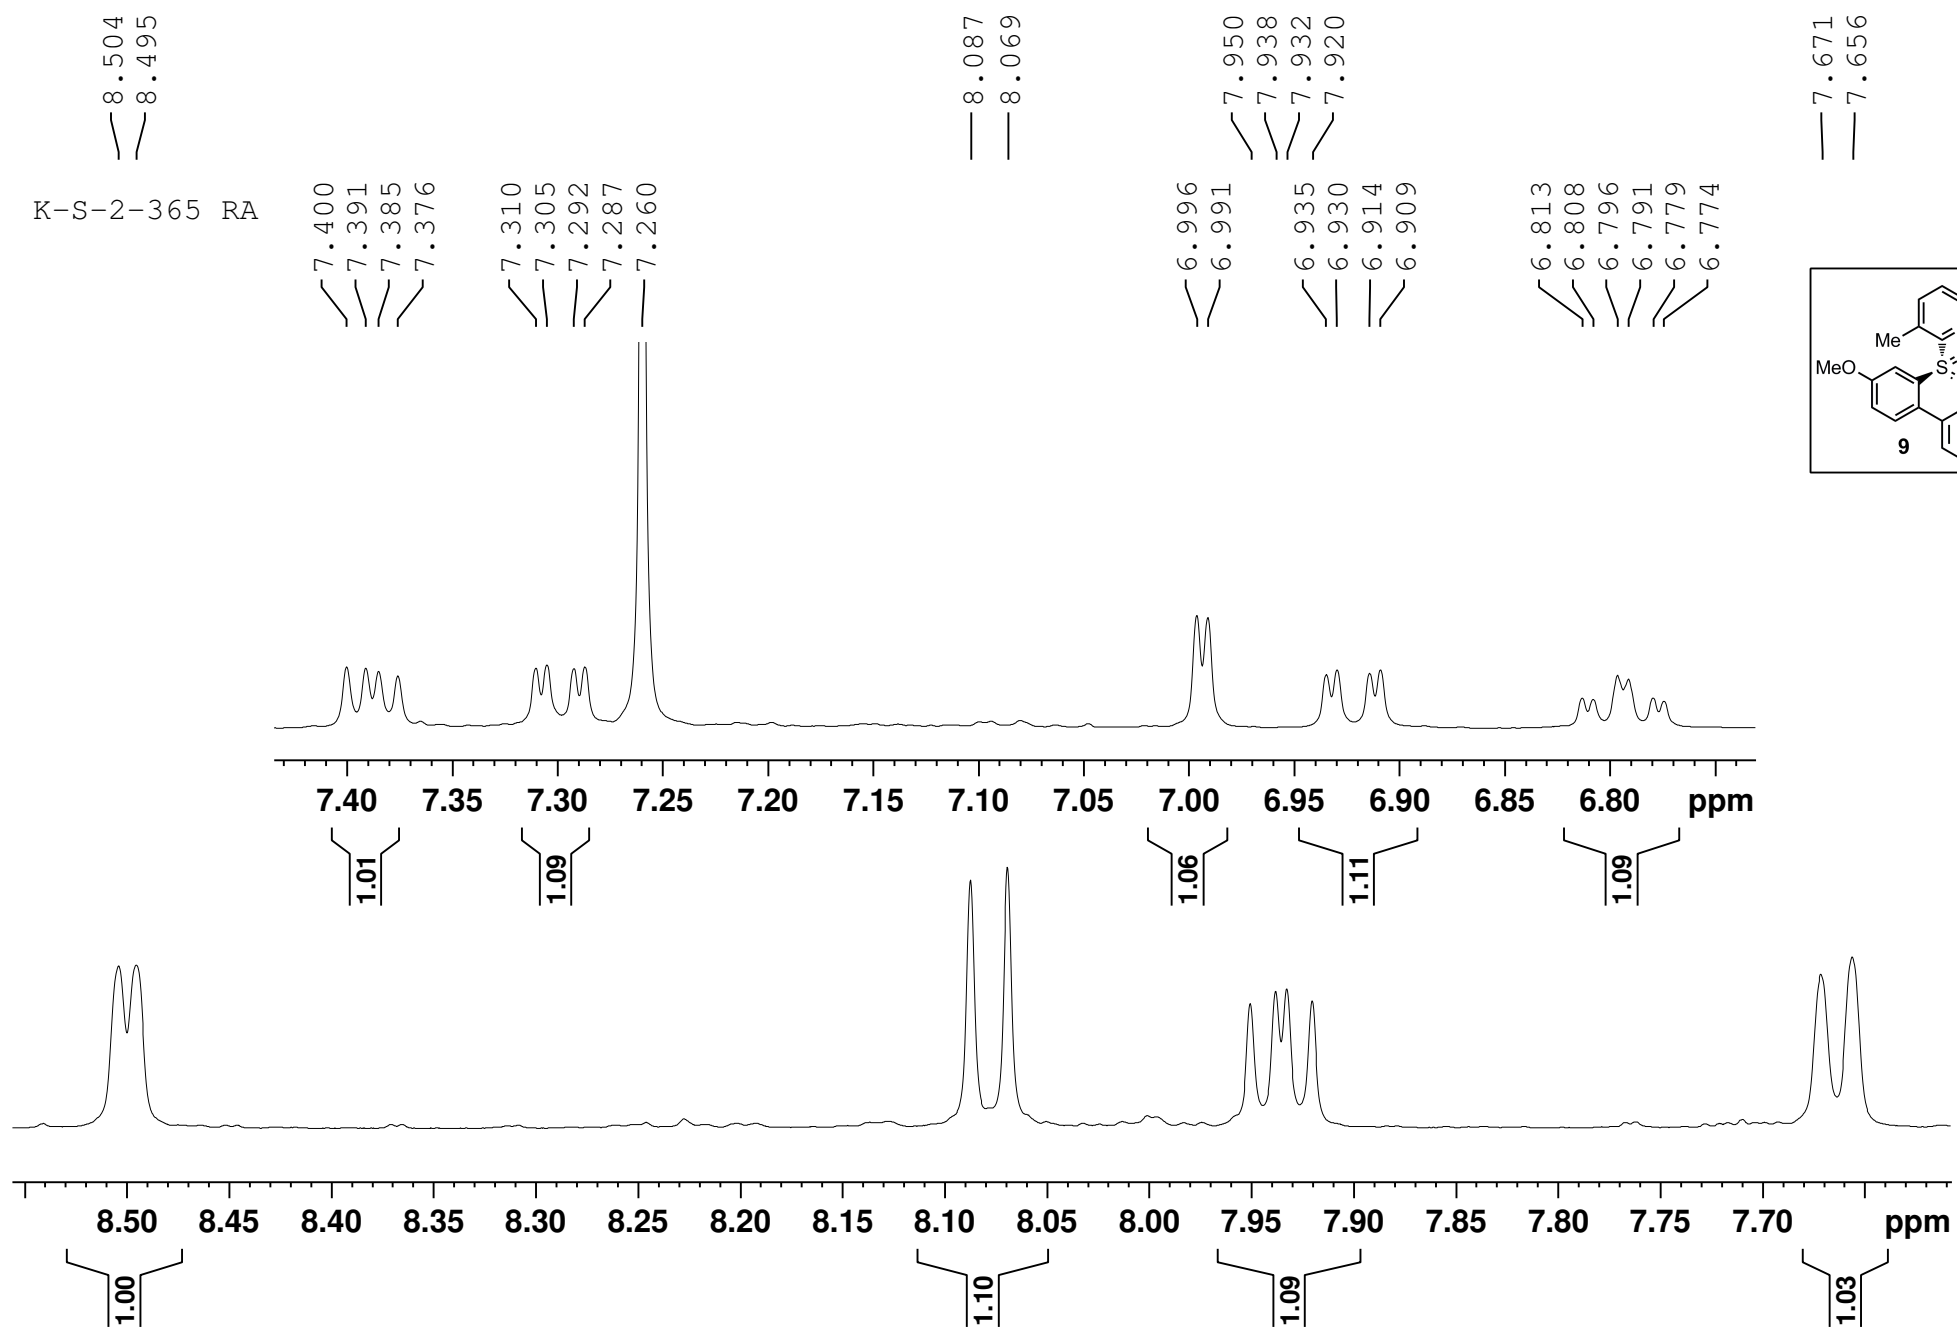

KALLOL-K-S-2-365 RA

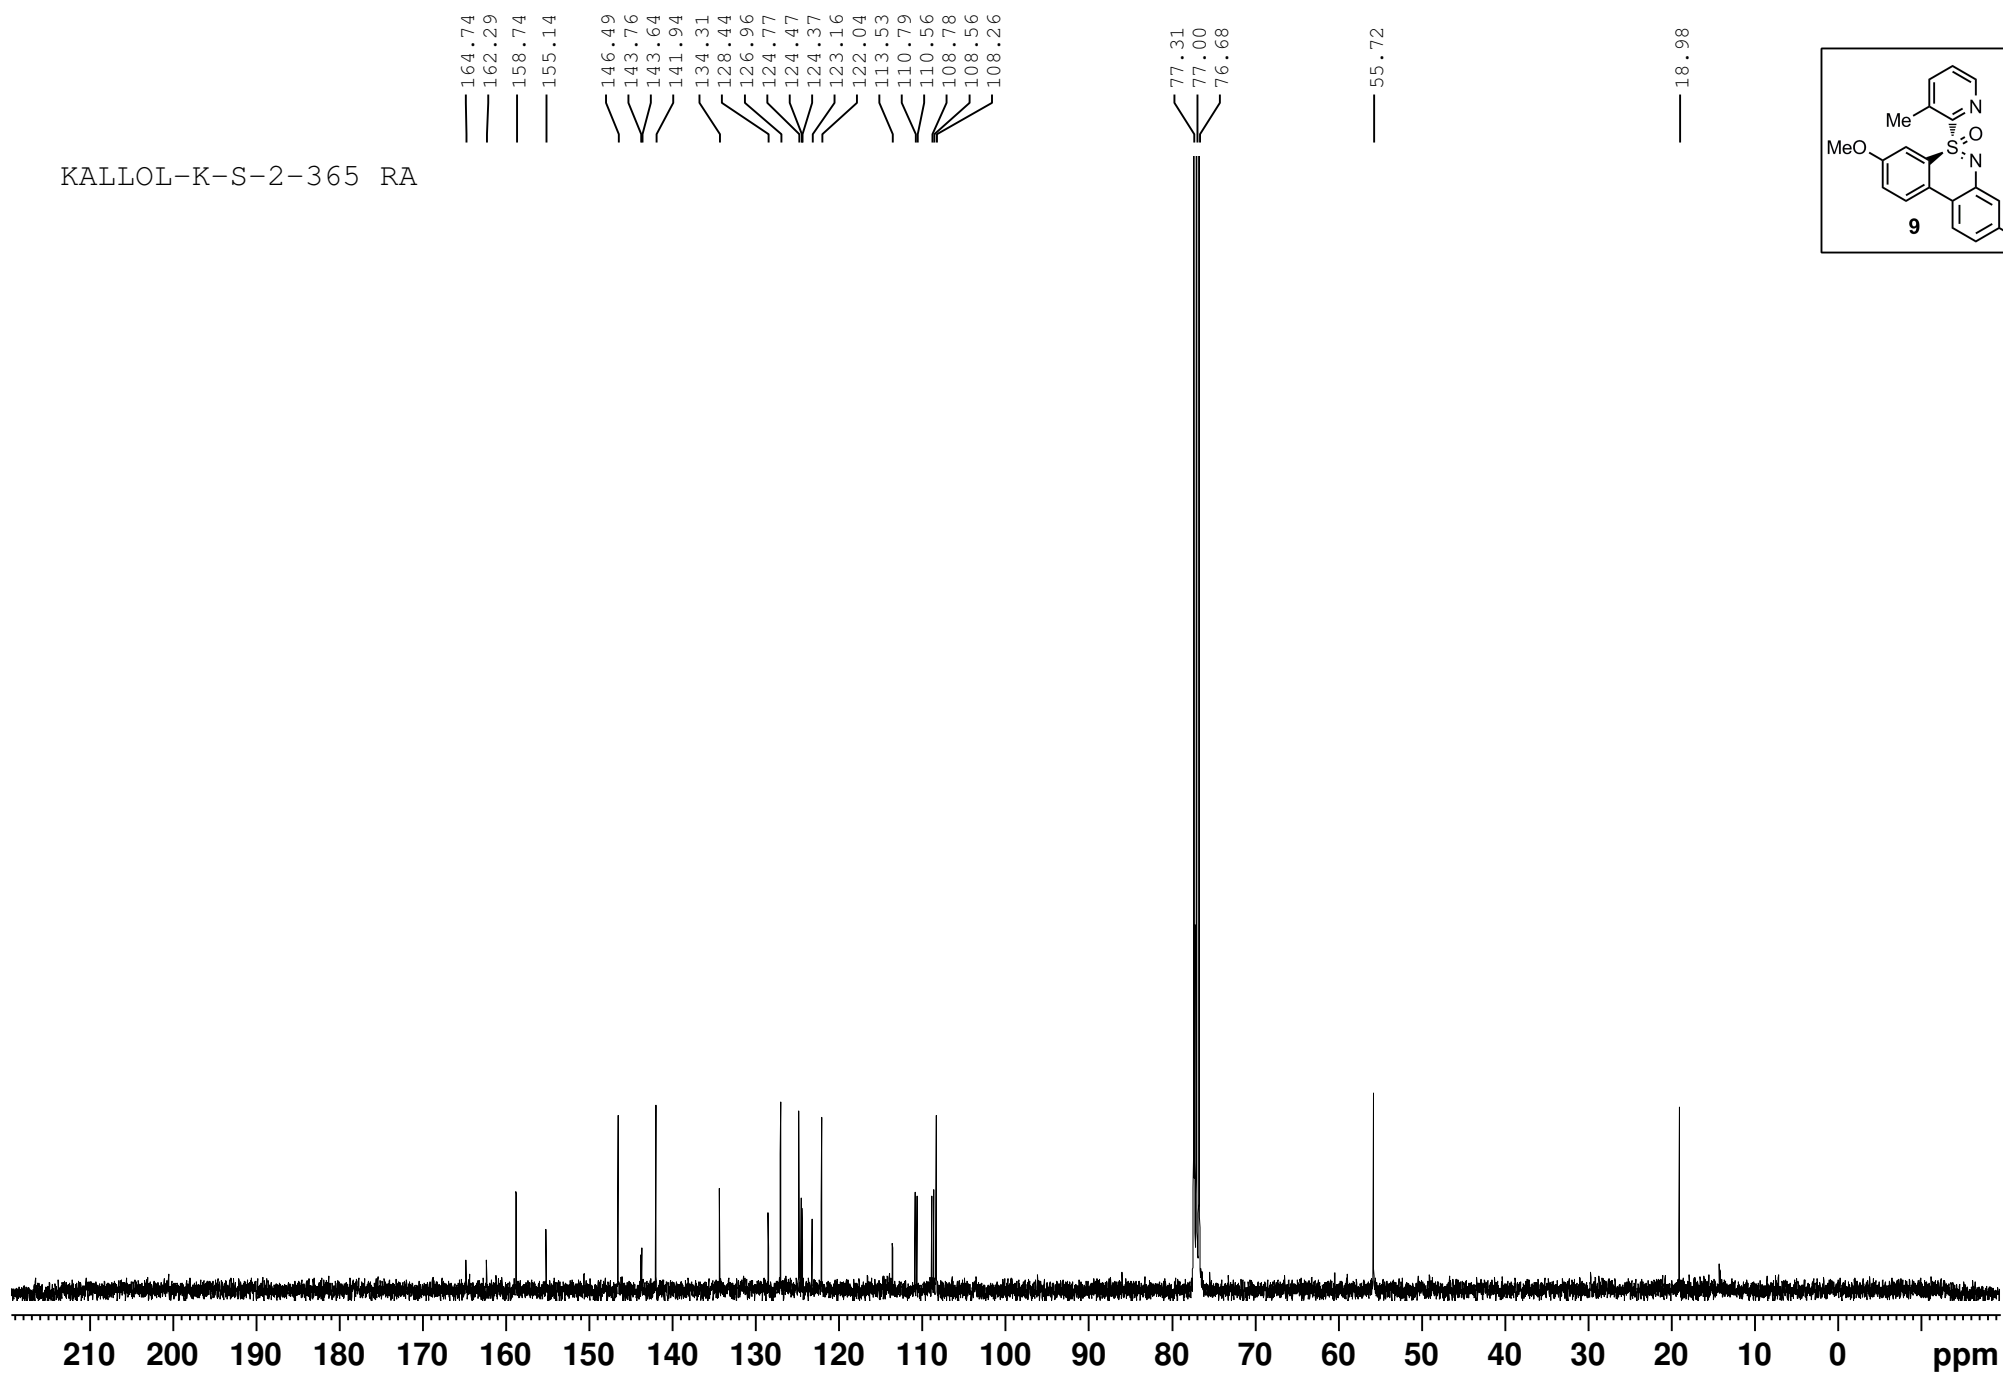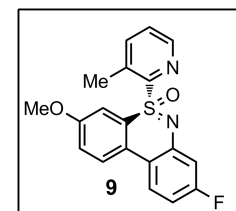



srs-2-365ra

-111.99

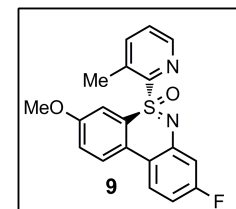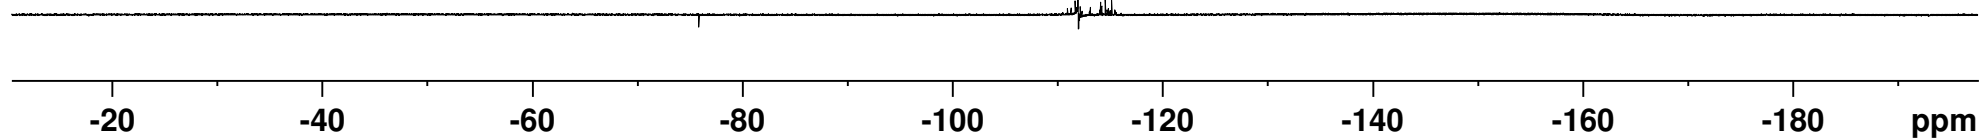

## &lt;Chromatogram&gt;

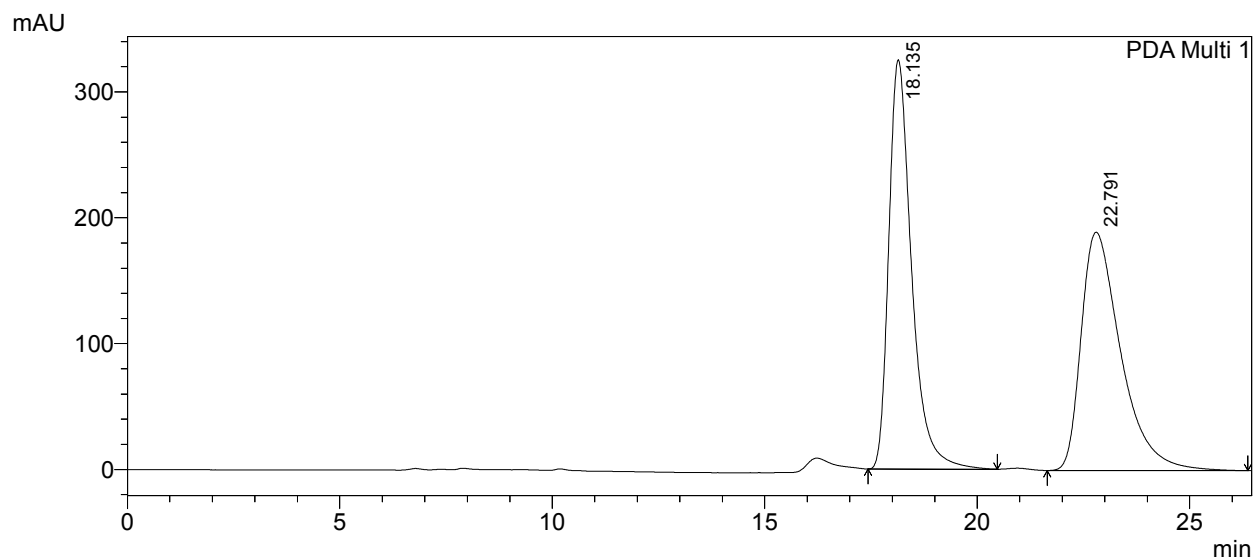

1 PDA Multi 1/254nm 4nm

PeakTable

PDA Ch1 254nm 4nm

| Peak# | Ret. Time | Area     | Height | Area %  | Height % |
|-------|-----------|----------|--------|---------|----------|
| 1     | 18.135    | 12140347 | 325359 | 49.728  | 63.208   |
| 2     | 22.791    | 12273309 | 189387 | 50.272  | 36.792   |
| Total |           | 24413656 | 514746 | 100.000 | 100.000  |

## &lt;Chromatogram&gt;

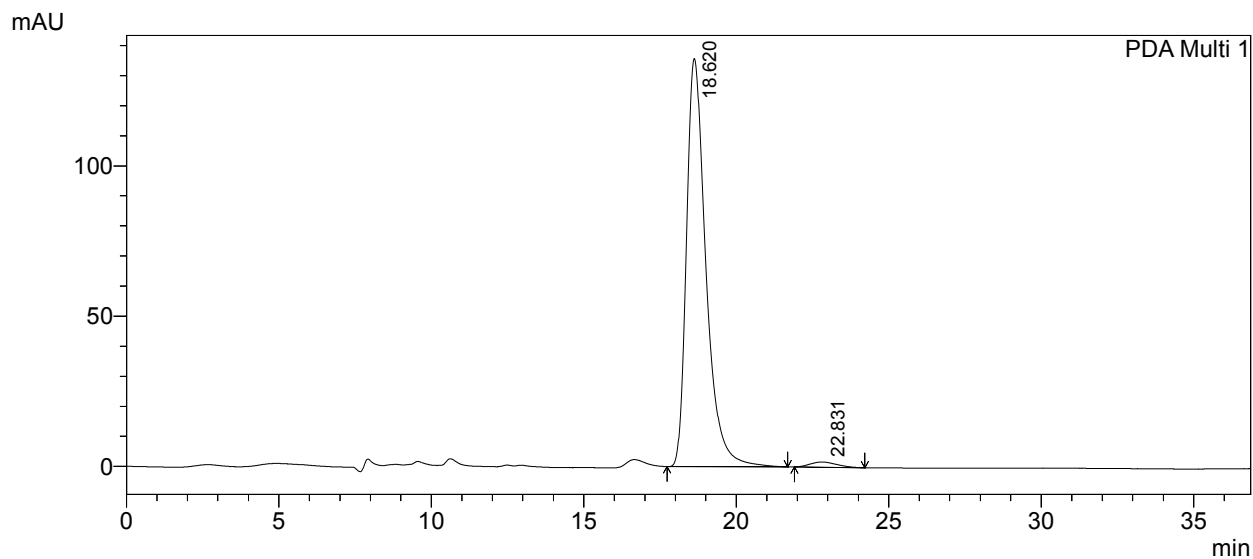

1 PDA Multi 1/254nm 4nm

PeakTable

PDA Ch1 254nm 4nm

| Peak# | Ret. Time | Area    | Height | Area %  | Height % |
|-------|-----------|---------|--------|---------|----------|
| 1     | 18.620    | 6030335 | 135858 | 98.226  | 98.712   |
| 2     | 22.831    | 108928  | 1773   | 1.774   | 1.288    |
| Total |           | 6139263 | 137631 | 100.000 | 100.000  |

1a

<Chromatogram>

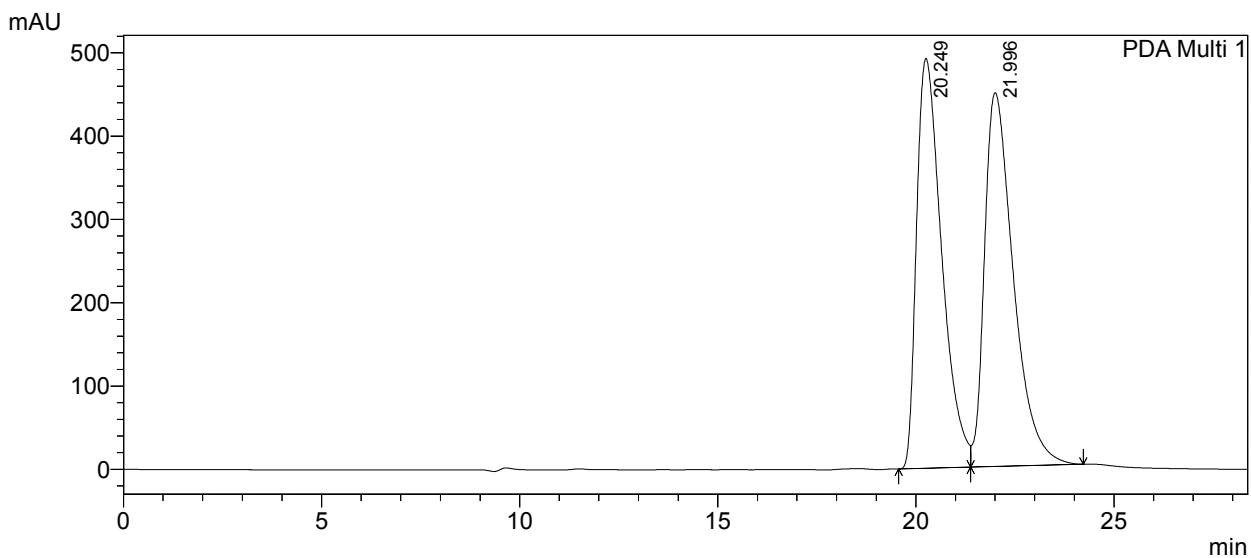

1 PDA Multi 1/254nm 4nm

PeakTable

PDA Ch1 254nm 4nm

| Peak# | Ret. Time | Area     | Height | Area %  | Height % |
|-------|-----------|----------|--------|---------|----------|
| 1     | 20.249    | 21759605 | 492183 | 48.883  | 52.303   |
| 2     | 21.996    | 22753619 | 448841 | 51.117  | 47.697   |
| Total |           | 44513224 | 941024 | 100.000 | 100.000  |

<Chromatogram>

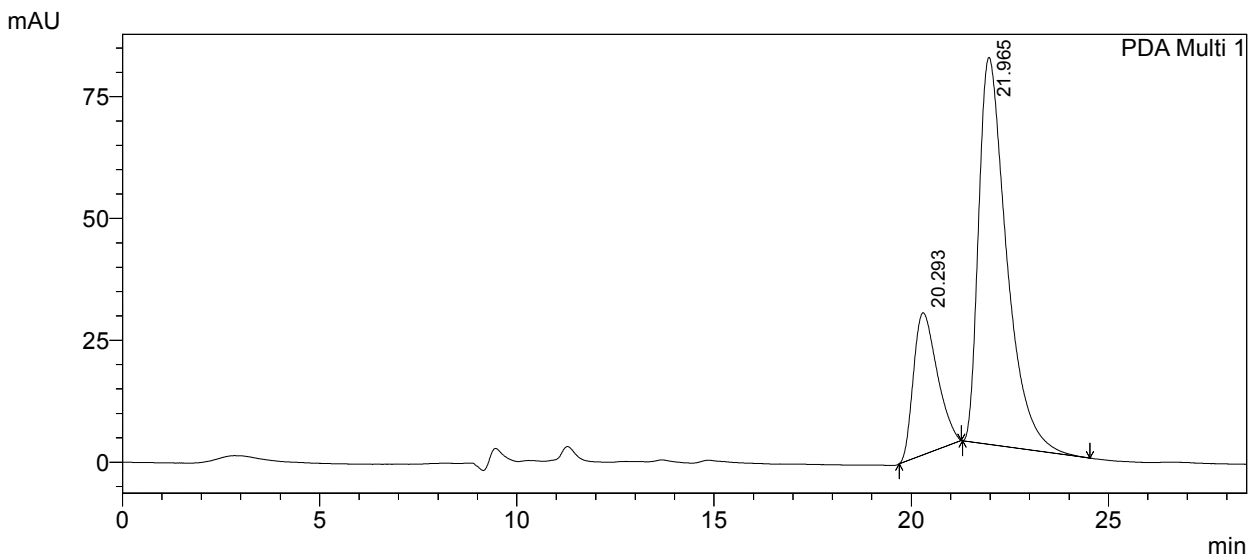

1 PDA Multi 1/254nm 4nm

PeakTable

PDA Ch1 254nm 4nm

| Peak# | Ret. Time | Area    | Height | Area %  | Height % |
|-------|-----------|---------|--------|---------|----------|
| 1     | 20.293    | 1222975 | 29183  | 23.816  | 26.872   |
| 2     | 21.965    | 3912044 | 79417  | 76.184  | 73.128   |
| Total |           | 5135019 | 108600 | 100.000 | 100.000  |

<Chromatogram>

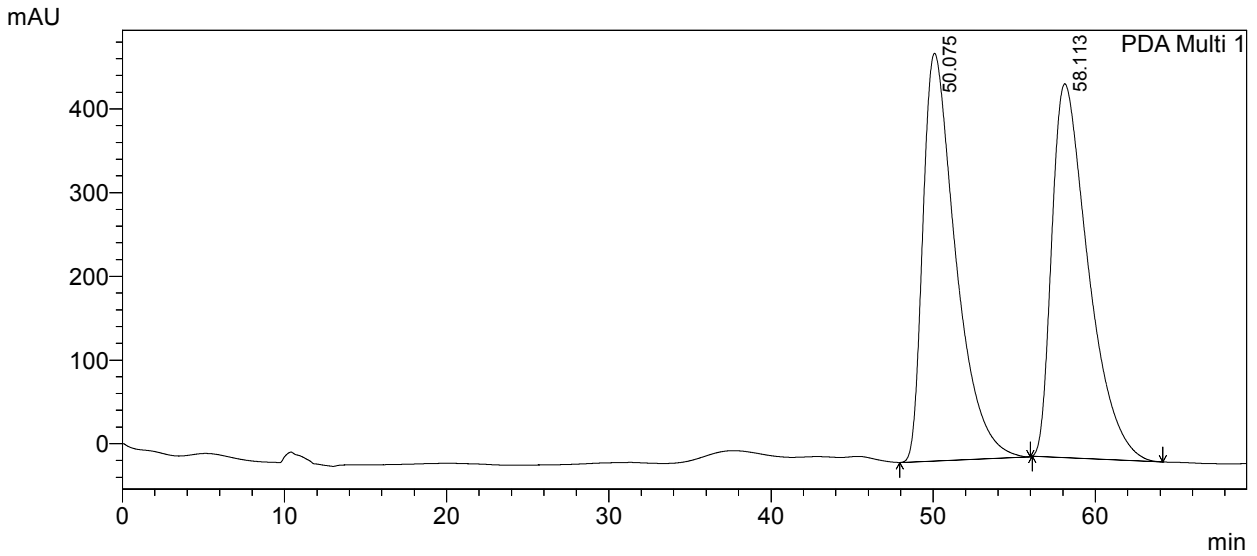

1 PDA Multi 1/254nm 4nm

PeakTable

PDA Ch1 254nm 4nm

| Peak# | Ret. Time | Area      | Height | Area %  | Height % |
|-------|-----------|-----------|--------|---------|----------|
| 1     | 50.075    | 68565966  | 487104 | 49.593  | 52.170   |
| 2     | 58.113    | 69690288  | 446578 | 50.407  | 47.830   |
| Total |           | 138256255 | 933682 | 100.000 | 100.000  |

<Chromatogram>

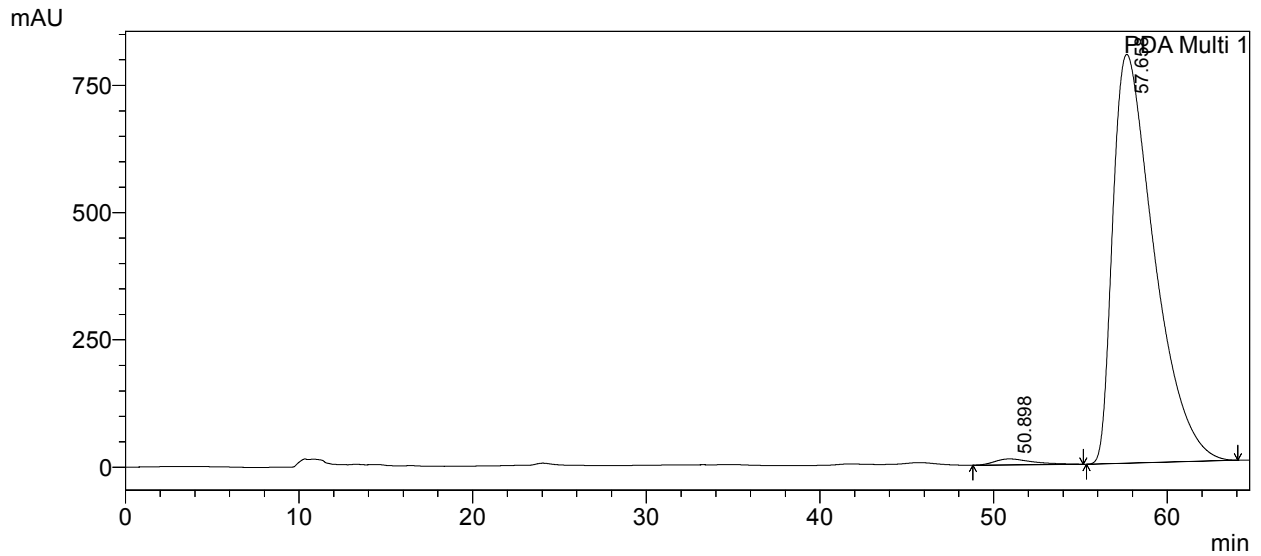

1 PDA Multi 1/254nm 4nm

PeakTable

PDA Ch1 254nm 4nm

| Peak# | Ret. Time | Area      | Height | Area %  | Height % |
|-------|-----------|-----------|--------|---------|----------|
| 1     | 50.898    | 1758161   | 11717  | 1.308   | 1.439    |
| 2     | 57.658    | 132678713 | 802741 | 98.692  | 98.561   |
| Total |           | 134436874 | 814458 | 100.000 | 100.000  |

1b

<Chromatogram>

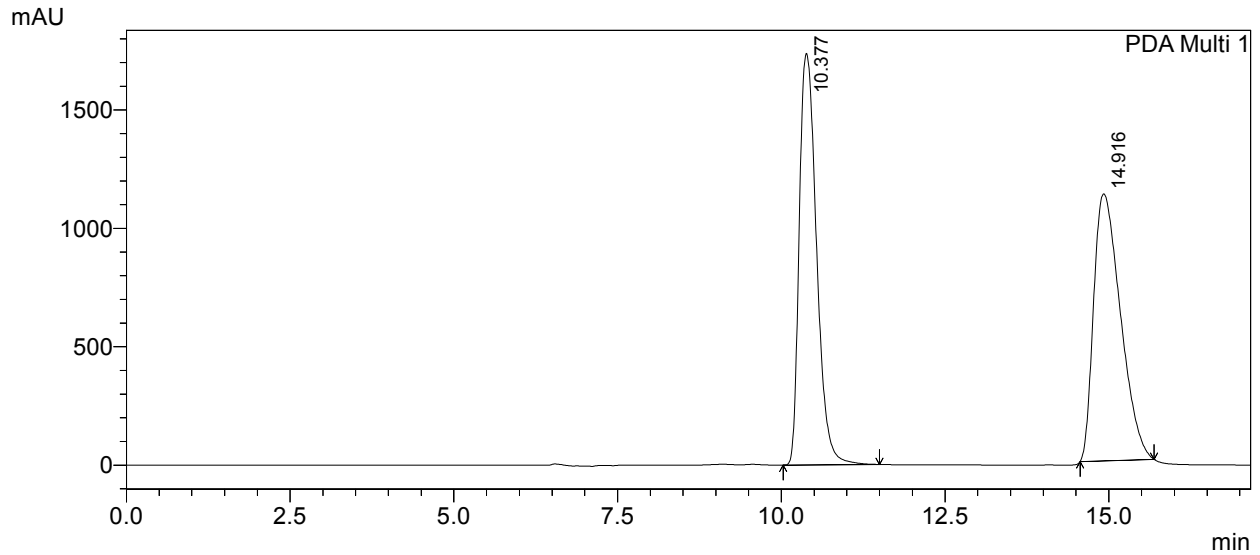

1 PDA Multi 1/254nm 4nm

PeakTable

PDA Ch1 254nm 4nm

| Peak# | Ret. Time | Area     | Height  | Area %  | Height % |
|-------|-----------|----------|---------|---------|----------|
| 1     | 10.377    | 31942172 | 1738140 | 49.810  | 60.630   |
| 2     | 14.916    | 32186004 | 1128662 | 50.190  | 39.370   |
| Total |           | 64128176 | 2866802 | 100.000 | 100.000  |

<Chromatogram>

C:\LabSolutions\Data\Project1\k-9-31 smc meoh 0.5 ml ig-3.lcd

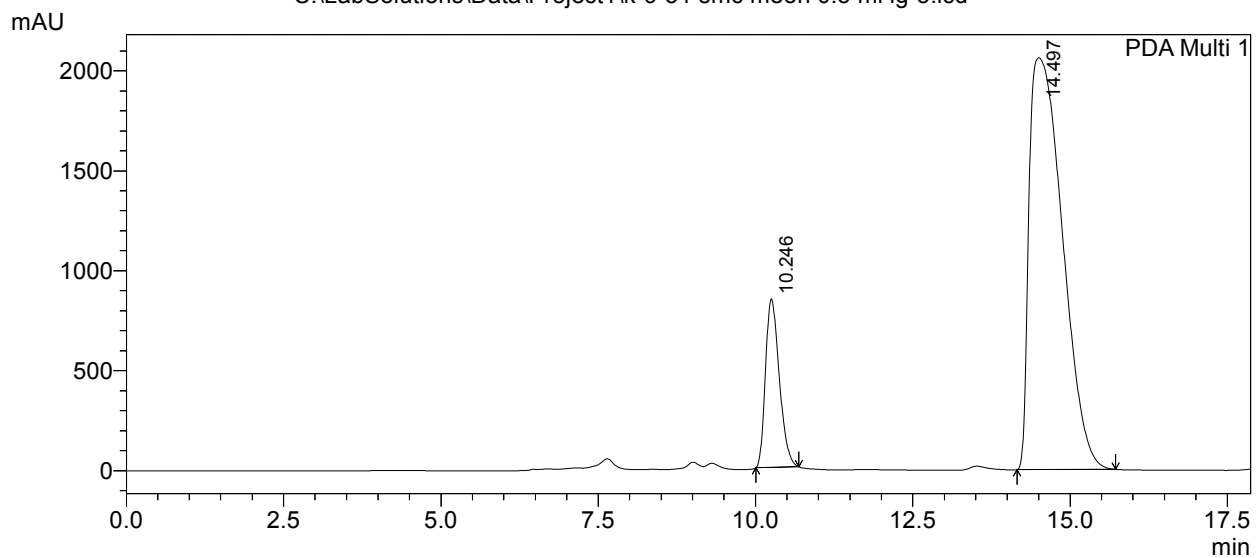

1 PDA Multi 1/254nm 4nm

PeakTable

PDA Ch1 254nm 4nm

| Peak# | Ret. Time | Area     | Height  | Area %  | Height % |
|-------|-----------|----------|---------|---------|----------|
| 1     | 10.246    | 12888462 | 843097  | 14.534  | 29.044   |
| 2     | 14.497    | 75787225 | 2059744 | 85.466  | 70.956   |
| Total |           | 88675687 | 2902841 | 100.000 | 100.000  |

<Chromatogram>

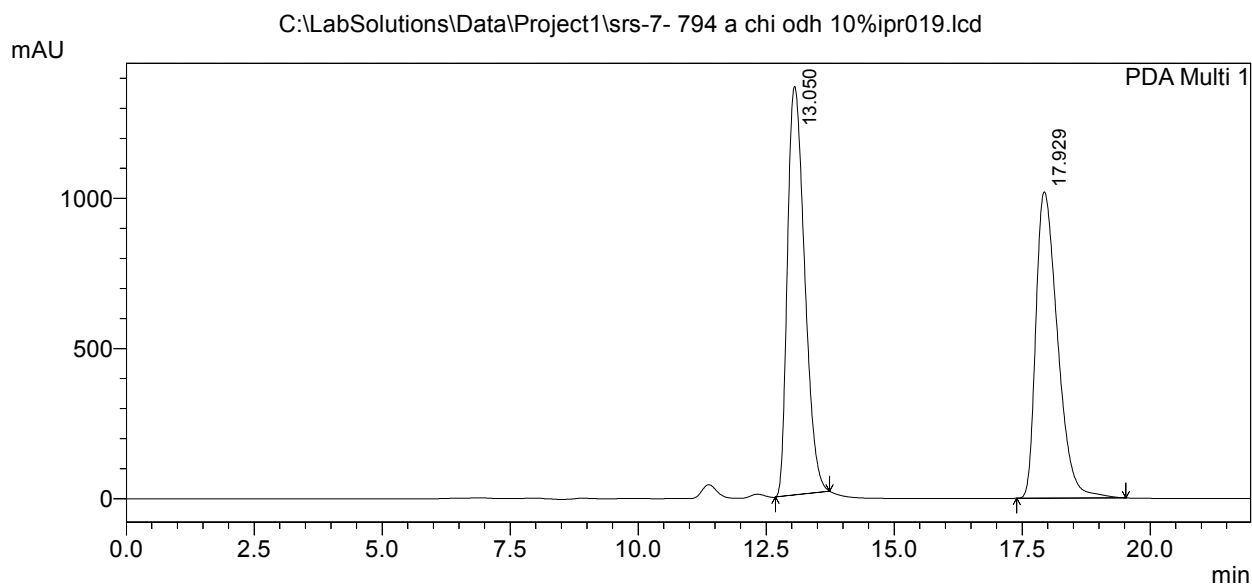

1 PDA Multi 1/254nm 4nm

PeakTable

PDA Ch1 254nm 4nm

| Peak# | Ret. Time | Area     | Height  | Area %  | Height % |
|-------|-----------|----------|---------|---------|----------|
| 1     | 13.050    | 31775587 | 1360545 | 51.362  | 57.143   |
| 2     | 17.929    | 30090737 | 1020410 | 48.638  | 42.857   |
| Total |           | 61866323 | 2380955 | 100.000 | 100.000  |

<Chromatogram>

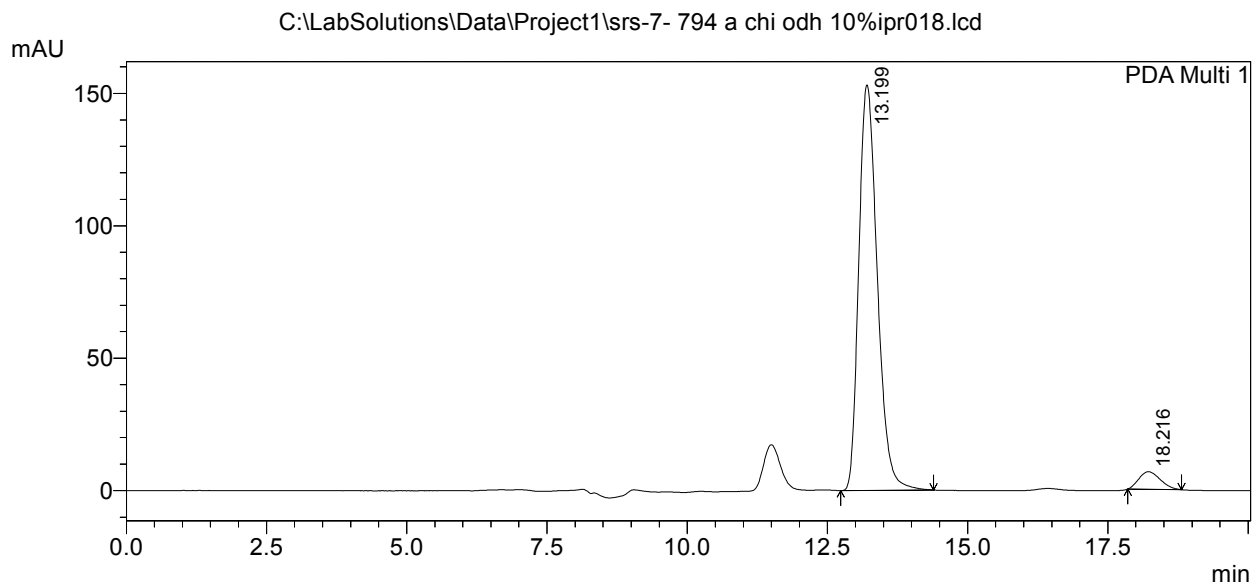

1 PDA Multi 1/254nm 4nm

PeakTable

PDA Ch1 254nm 4nm

| Peak# | Ret. Time | Area    | Height | Area %  | Height % |
|-------|-----------|---------|--------|---------|----------|
| 1     | 13.199    | 3523329 | 153194 | 95.249  | 95.851   |
| 2     | 18.216    | 175761  | 6632   | 4.751   | 4.149    |
| Total |           | 3699090 | 159826 | 100.000 | 100.000  |

<Chromatogram>

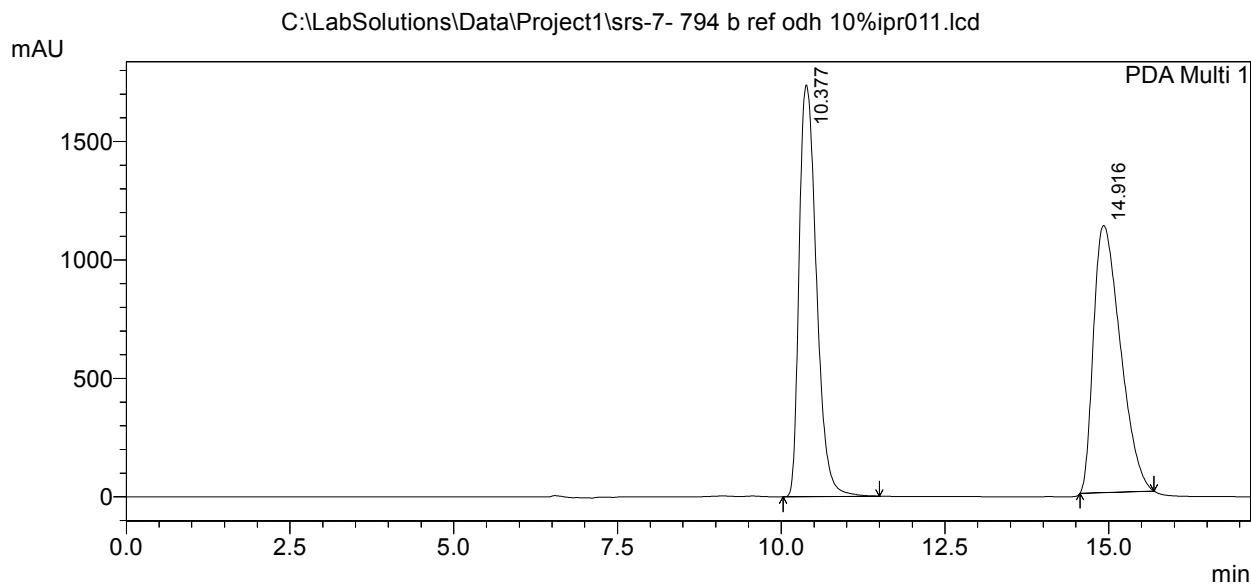

1 PDA Multi 1/254nm 4nm

PeakTable

PDA Ch1 254nm 4nm

| Peak# | Ret. Time | Area     | Height  | Area %  | Height % |
|-------|-----------|----------|---------|---------|----------|
| 1     | 10.377    | 31942172 | 1738140 | 49.810  | 60.630   |
| 2     | 14.916    | 32186004 | 1128662 | 50.190  | 39.370   |
| Total |           | 64128176 | 2866802 | 100.000 | 100.000  |

<Chromatogram>

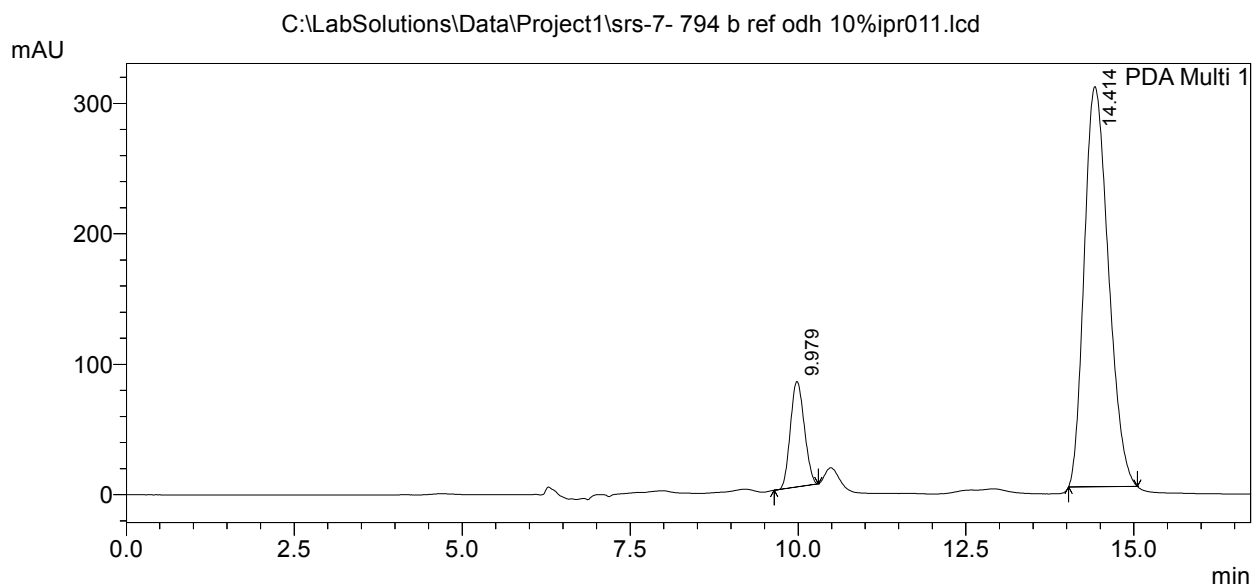

1 PDA Multi 1/254nm 4nm

PeakTable

PDA Ch1 254nm 4nm

| Peak# | Ret. Time | Area    | Height | Area %  | Height % |
|-------|-----------|---------|--------|---------|----------|
| 1     | 9.979     | 1168220 | 80921  | 13.208  | 20.881   |
| 2     | 14.414    | 7676274 | 306614 | 86.792  | 79.119   |
| Total |           | 8844495 | 387534 | 100.000 | 100.000  |

<Chromatogram>

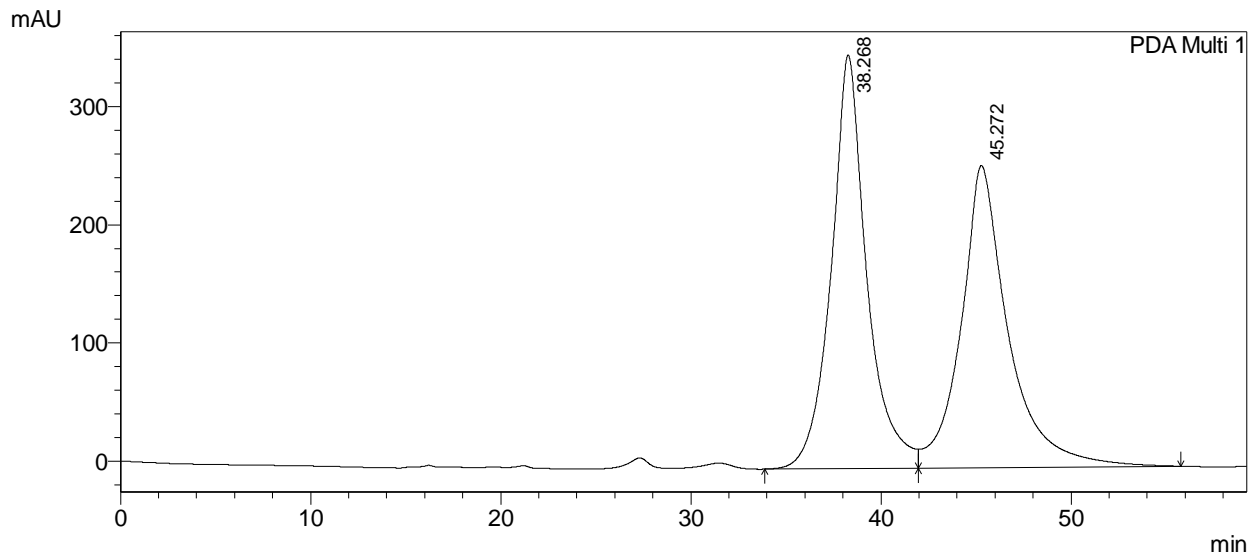

1 PDA Multi 1/254nm 4nm

PeakTable

PDA Ch1 254nm 4nm

| Peak# | Ret. Time | Area     | Height | Area %  | Height % |
|-------|-----------|----------|--------|---------|----------|
| 1     | 38.268    | 45546152 | 350035 | 50.773  | 57.781   |
| 2     | 45.272    | 44158452 | 255761 | 49.227  | 42.219   |
| Total |           | 89704604 | 605796 | 100.000 | 100.000  |

<Chromatogram>

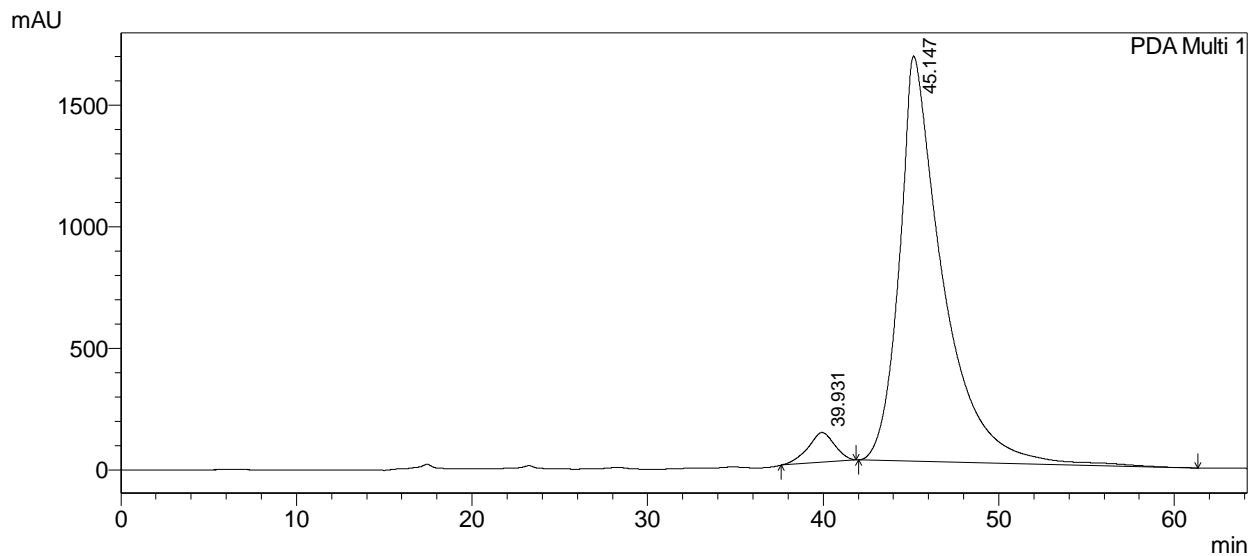

1 PDA Multi 1/254nm 4nm

PeakTable

PDA Ch1 254nm 4nm

| Peak# | Ret. Time | Area      | Height  | Area %  | Height % |
|-------|-----------|-----------|---------|---------|----------|
| 1     | 39.931    | 13106862  | 123021  | 4.367   | 6.873    |
| 2     | 45.147    | 287054445 | 1667001 | 95.633  | 93.127   |
| Total |           | 300161307 | 1790022 | 100.000 | 100.000  |



1b

<Chromatogram>

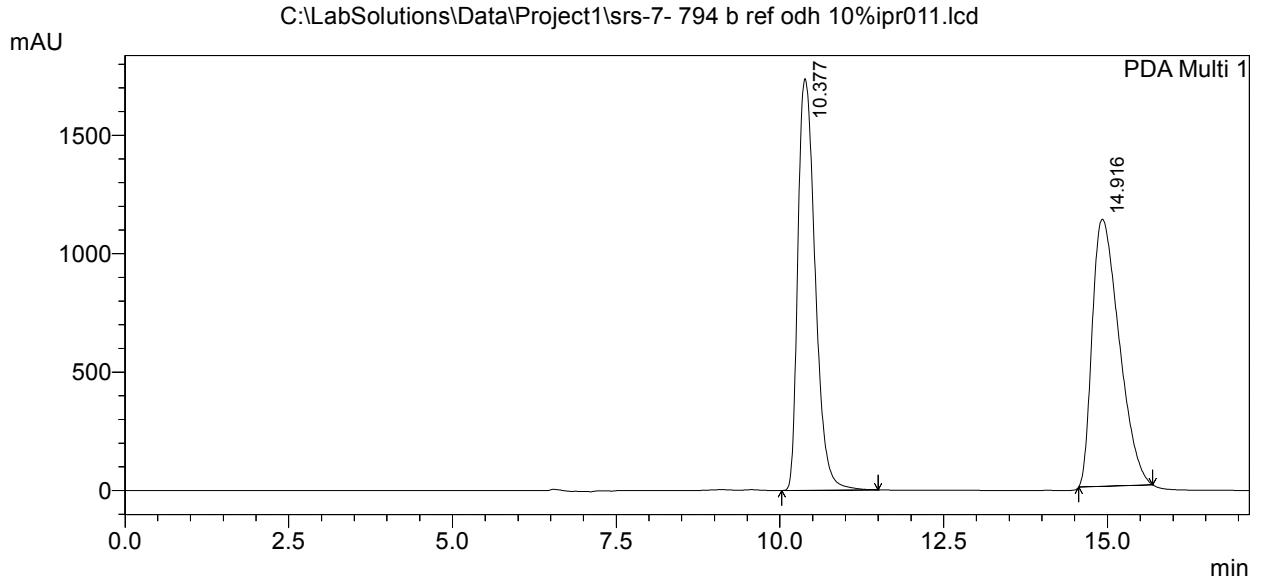

PeakTable

PDA Ch1 254nm 4nm

| Peak# | Ret. Time | Area     | Height  | Area %  | Height % |
|-------|-----------|----------|---------|---------|----------|
| 1     | 10.377    | 31942172 | 1738140 | 49.810  | 60.630   |
| 2     | 14.916    | 32186004 | 1128662 | 50.190  | 39.370   |
| Total |           | 64128176 | 2866802 | 100.000 | 100.000  |

<Chromatogram>

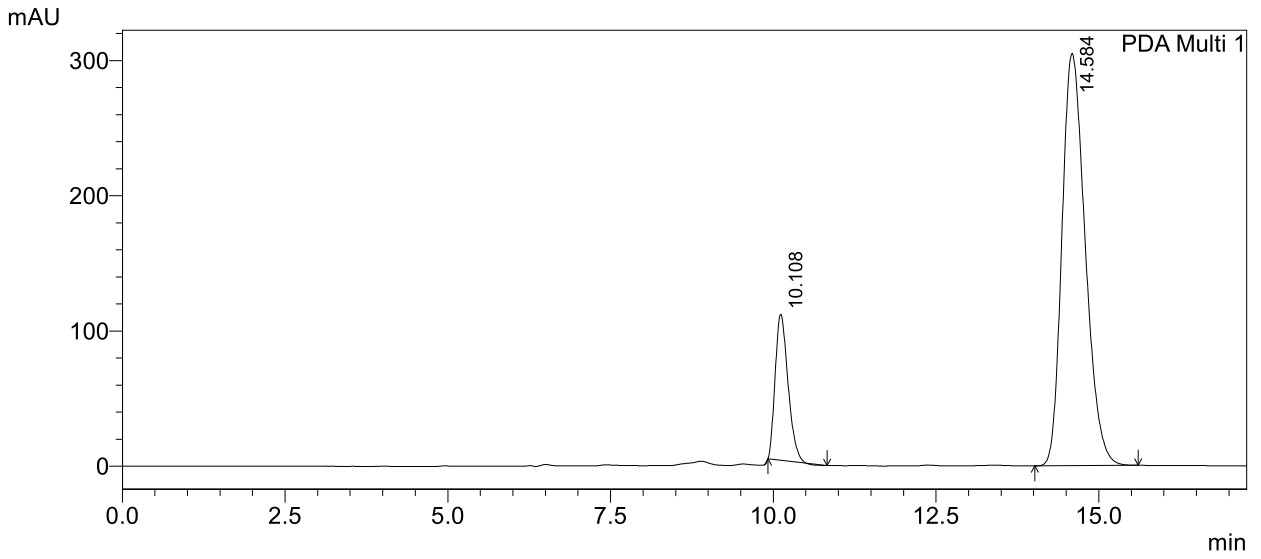

PeakTable

PDA Ch1 254nm 4nm

| Peak# | Ret. Time | Area    | Height | Area %  | Height % |
|-------|-----------|---------|--------|---------|----------|
| 1     | 10.108    | 1471807 | 107846 | 16.268  | 26.129   |
| 2     | 14.584    | 7575264 | 304904 | 83.732  | 73.871   |
| Total |           | 9047071 | 412751 | 100.000 | 100.000  |

## &lt;Chromatogram&gt;

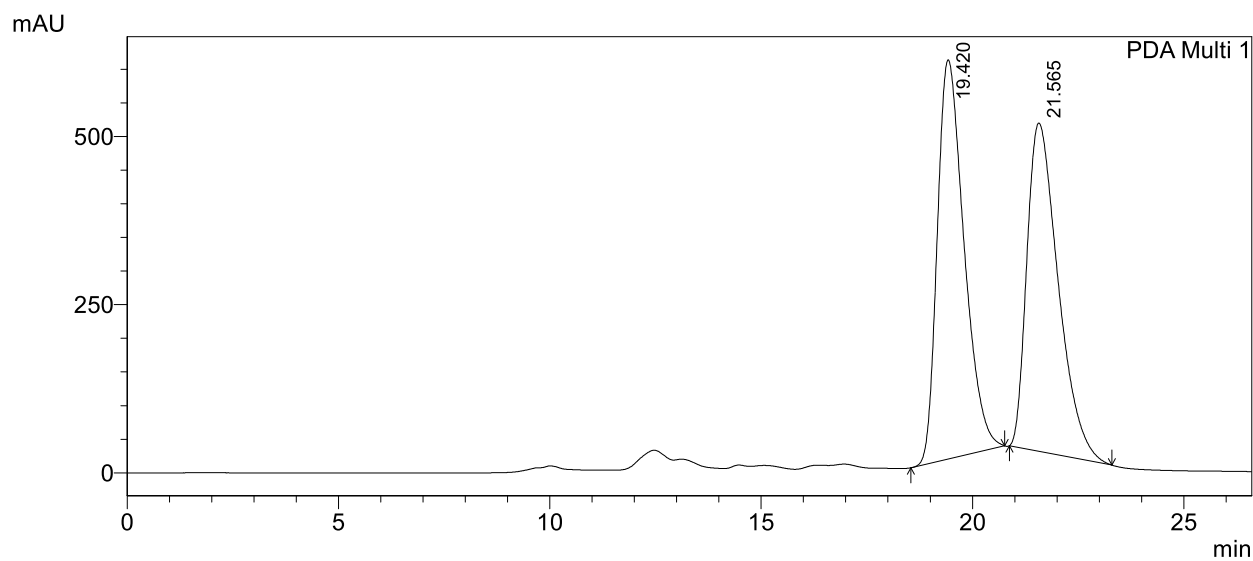

1 PDA Multi 1/254nm 4nm

PeakTable

PDA Ch1 254nm 4nm

| Peak# | Ret. Time | Area     | Height  | Area %  | Height % |
|-------|-----------|----------|---------|---------|----------|
| 1     | 19.420    | 26150298 | 593631  | 51.042  | 54.881   |
| 2     | 21.565    | 25082351 | 488036  | 48.958  | 45.119   |
| Total |           | 51232649 | 1081667 | 100.000 | 100.000  |

## &lt;Chromatogram&gt;

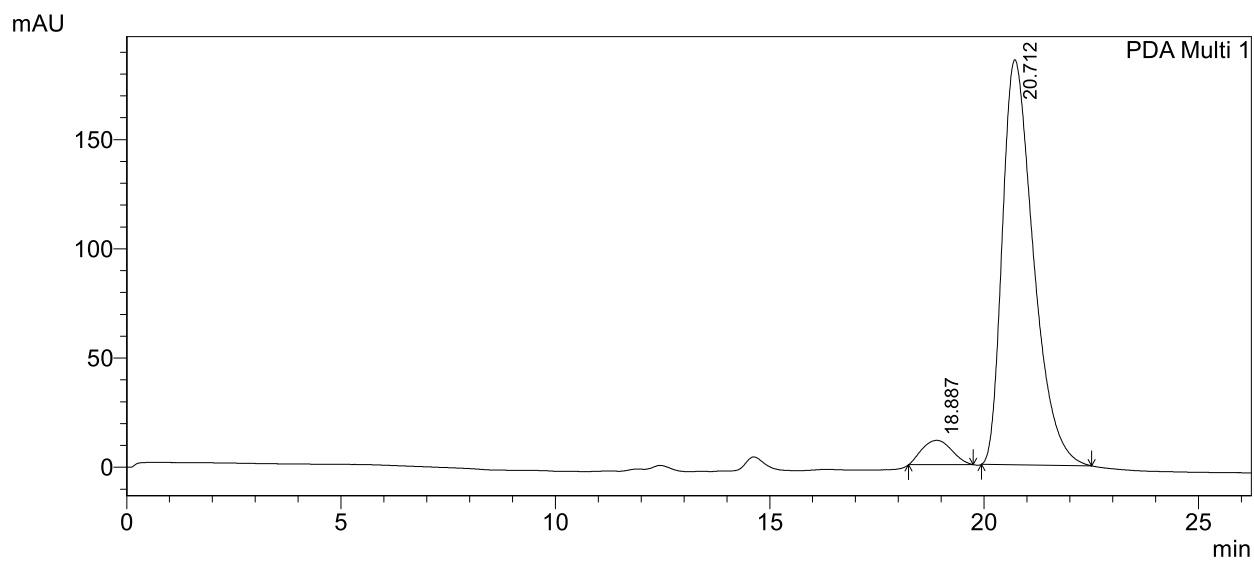

1 PDA Multi 1/254nm 4nm

PeakTable

PDA Ch1 254nm 4nm

| Peak# | Ret. Time | Area    | Height | Area %  | Height % |
|-------|-----------|---------|--------|---------|----------|
| 1     | 18.887    | 537356  | 11121  | 5.429   | 5.658    |
| 2     | 20.712    | 9360507 | 185421 | 94.571  | 94.342   |
| Total |           | 9897863 | 196542 | 100.000 | 100.000  |

1b

<Chromatogram>

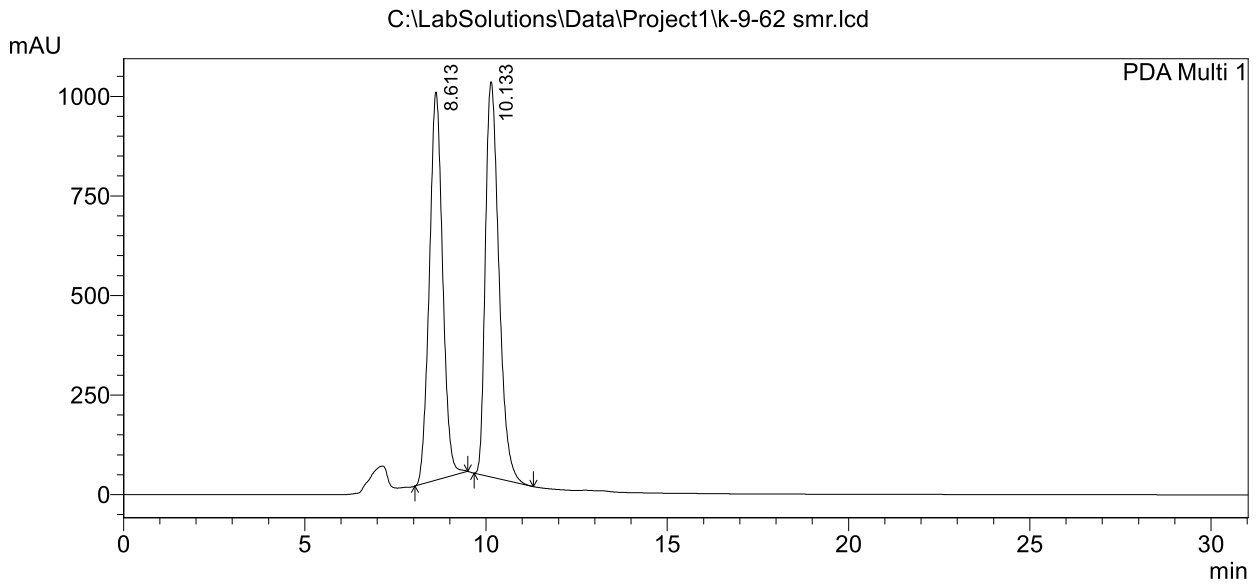

PeakTable

PDA Ch1 254nm 4nm

| Peak# | Ret. Time | Area     | Height  | Area %  | Height % |
|-------|-----------|----------|---------|---------|----------|
| 1     | 8.613     | 24842836 | 974882  | 49.118  | 49.567   |
| 2     | 10.133    | 25735150 | 991920  | 50.882  | 50.433   |
| Total |           | 50577986 | 1966802 | 100.000 | 100.000  |

<Chromatogram>

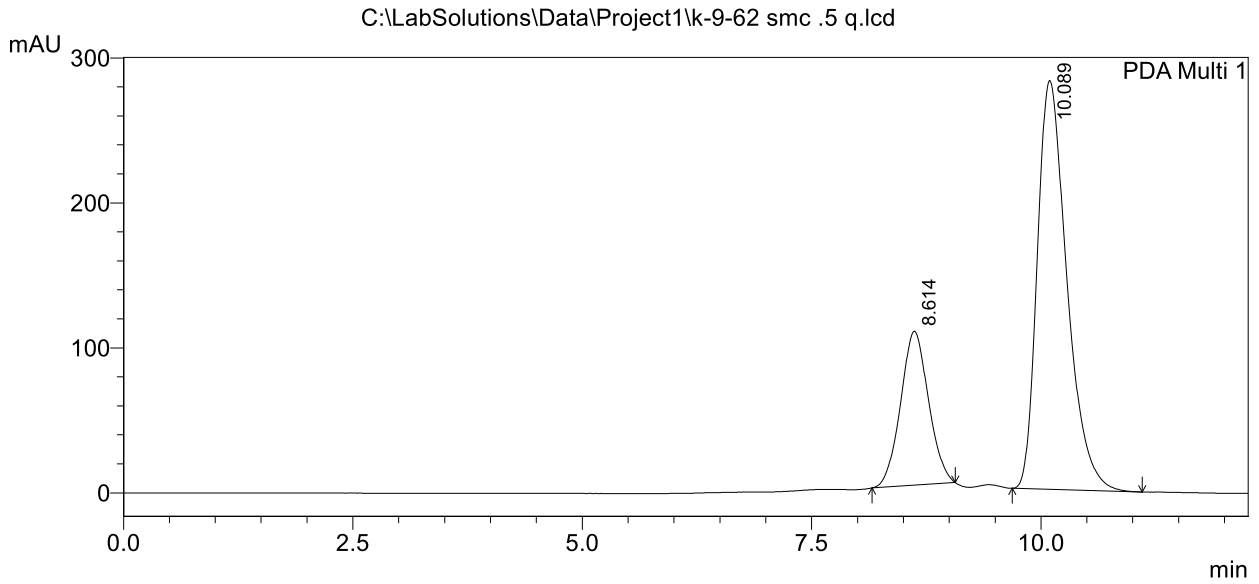

PeakTable

PDA Ch1 254nm 4nm

| Peak# | Ret. Time | Area    | Height | Area %  | Height % |
|-------|-----------|---------|--------|---------|----------|
| 1     | 8.614     | 2249015 | 106259 | 26.186  | 27.366   |
| 2     | 10.089    | 6339520 | 282035 | 73.814  | 72.634   |
| Total |           | 8588536 | 388294 | 100.000 | 100.000  |

<Chromatogram>

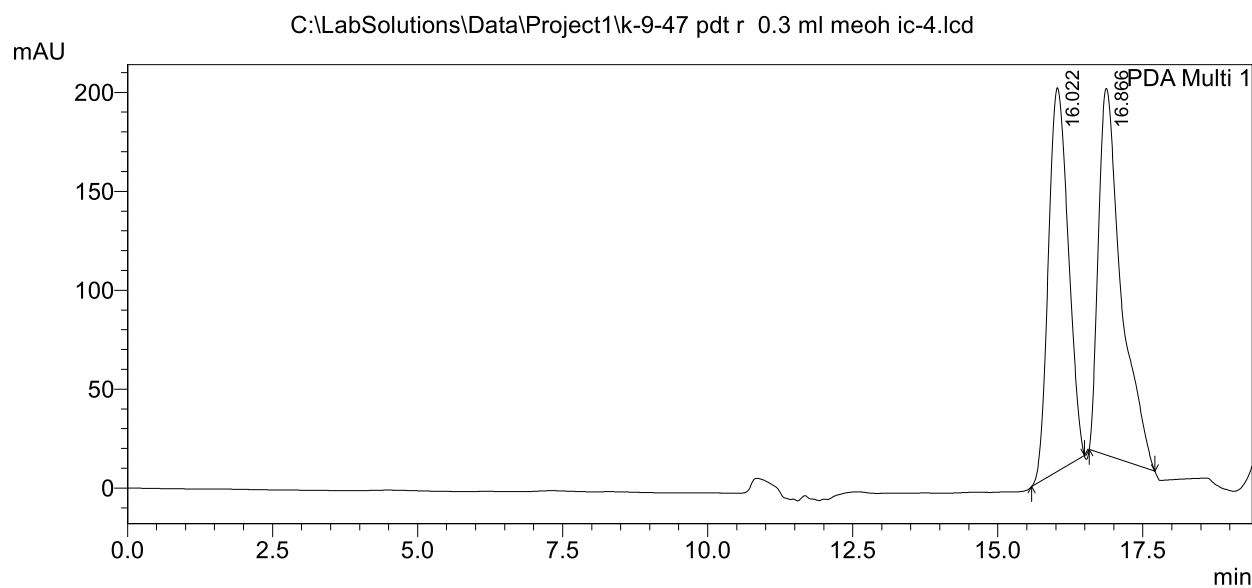

PeakTable

PDA Ch1 254nm 4nm

| Peak# | Ret. Time | Area    | Height | Area %  | Height % |
|-------|-----------|---------|--------|---------|----------|
| 1     | 16.022    | 4618687 | 194015 | 47.677  | 51.124   |
| 2     | 16.866    | 5068703 | 185482 | 52.323  | 48.876   |
| Total |           | 9687390 | 379497 | 100.000 | 100.000  |

<Chromatogram>

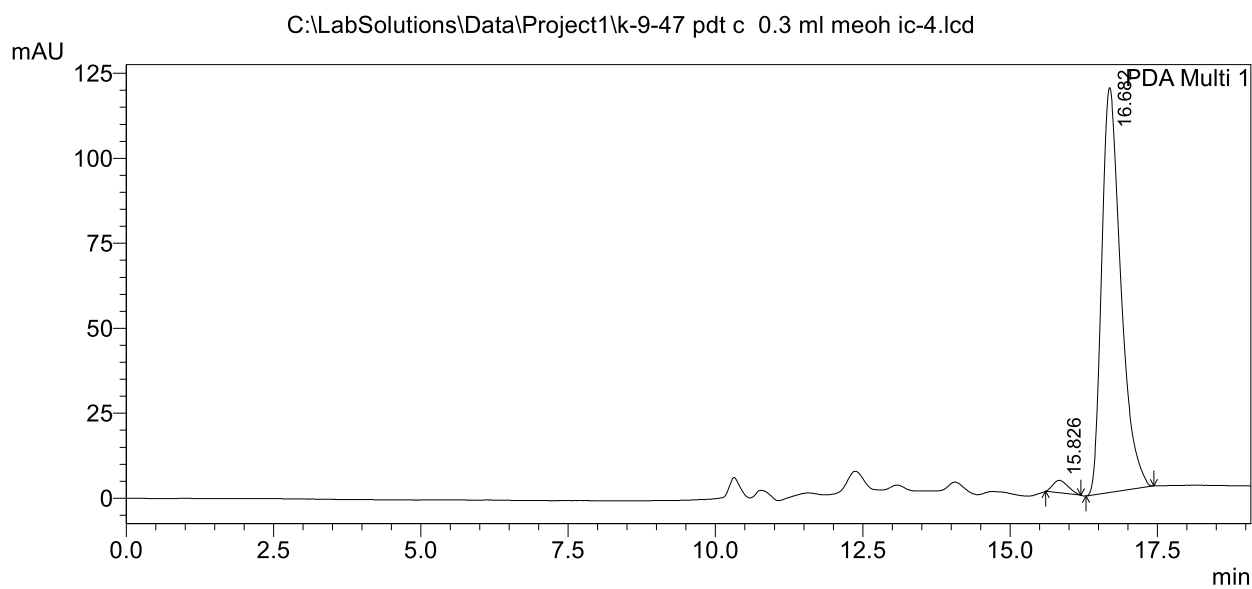

PeakTable

PDA Ch1 254nm 4nm

| Peak# | Ret. Time | Area    | Height | Area %  | Height % |
|-------|-----------|---------|--------|---------|----------|
| 1     | 15.826    | 66458   | 3673   | 2.404   | 2.992    |
| 2     | 16.682    | 2698595 | 119086 | 97.596  | 97.008   |
| Total |           | 2765053 | 122759 | 100.000 | 100.000  |

## &lt;Chromatogram&gt;

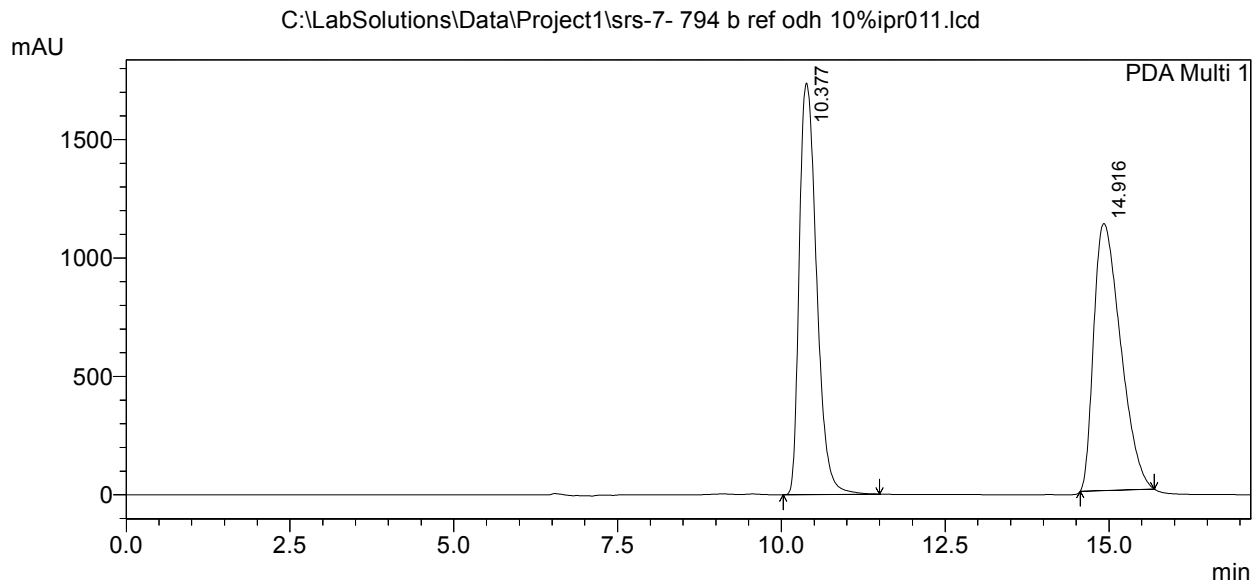

PeakTable

PDA Ch1 254nm 4nm

| Peak# | Ret. Time | Area     | Height  | Area %  | Height % |
|-------|-----------|----------|---------|---------|----------|
| 1     | 10.377    | 31942172 | 1738140 | 49.810  | 60.630   |
| 2     | 14.916    | 32186004 | 1128662 | 50.190  | 39.370   |
| Total |           | 64128176 | 2866802 | 100.000 | 100.000  |

## &lt;Chromatogram&gt;

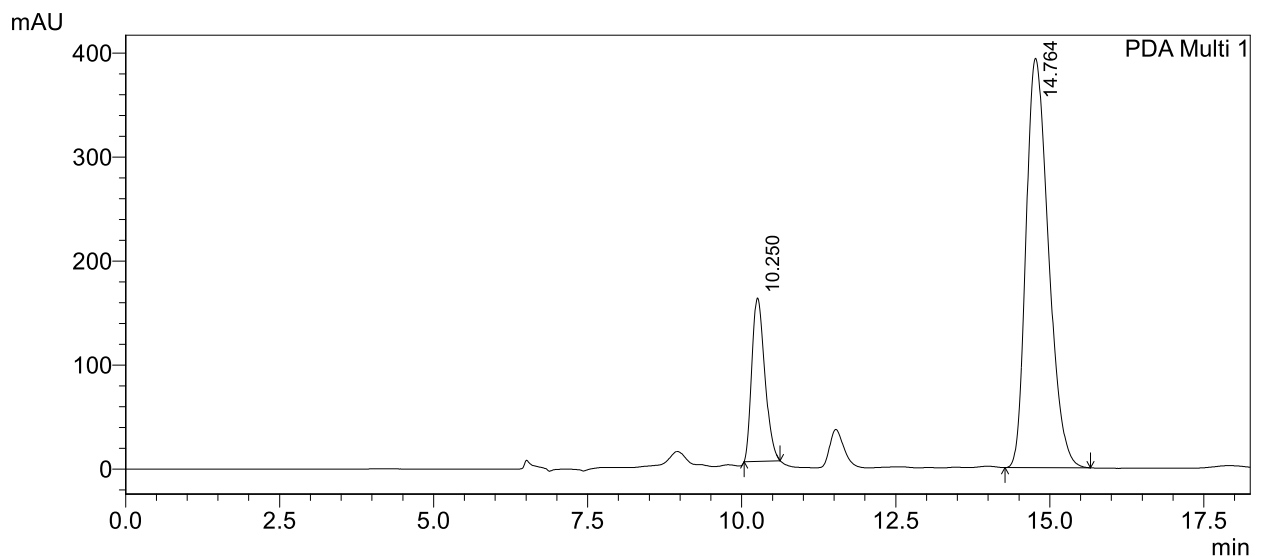

PeakTable

PDA Ch1 254nm 4nm

| Peak# | Ret. Time | Area     | Height | Area %  | Height % |
|-------|-----------|----------|--------|---------|----------|
| 1     | 10.250    | 2314939  | 157128 | 18.838  | 28.522   |
| 2     | 14.764    | 9973493  | 393781 | 81.162  | 71.478   |
| Total |           | 12288432 | 550909 | 100.000 | 100.000  |

<Chromatogram>

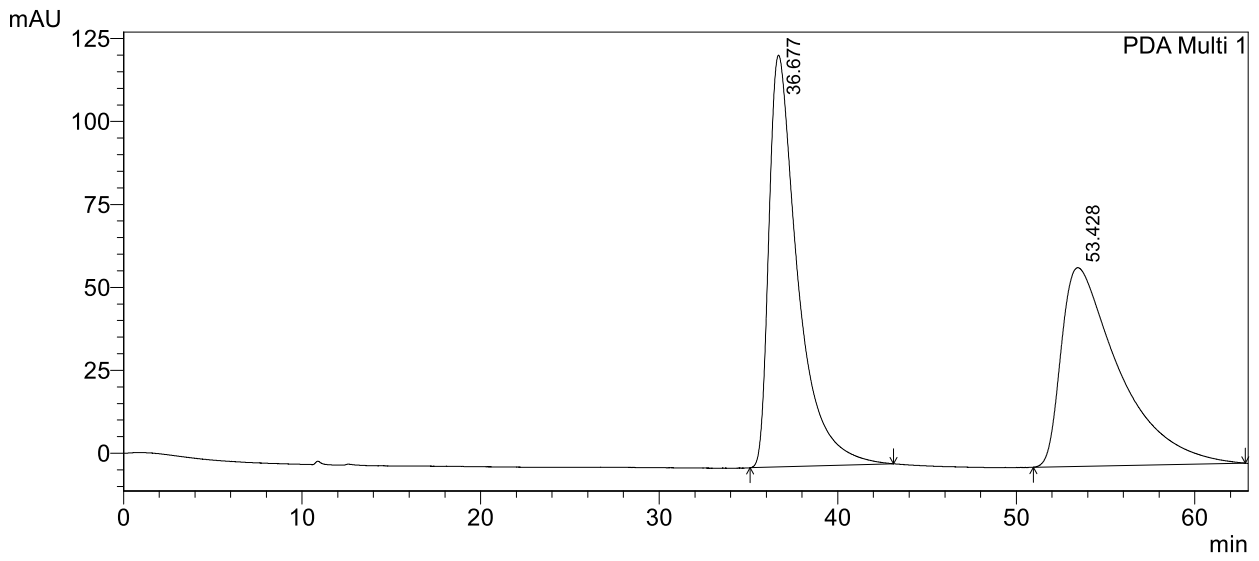

PeakTable

PDA Ch1 254nm 4nm

| Peak# | Ret. Time | Area     | Height | Area %  | Height % |
|-------|-----------|----------|--------|---------|----------|
| 1     | 36.677    | 13955896 | 124115 | 50.822  | 67.463   |
| 2     | 53.428    | 13504214 | 59859  | 49.178  | 32.537   |
| Total |           | 27460110 | 183974 | 100.000 | 100.000  |

<Chromatogram>

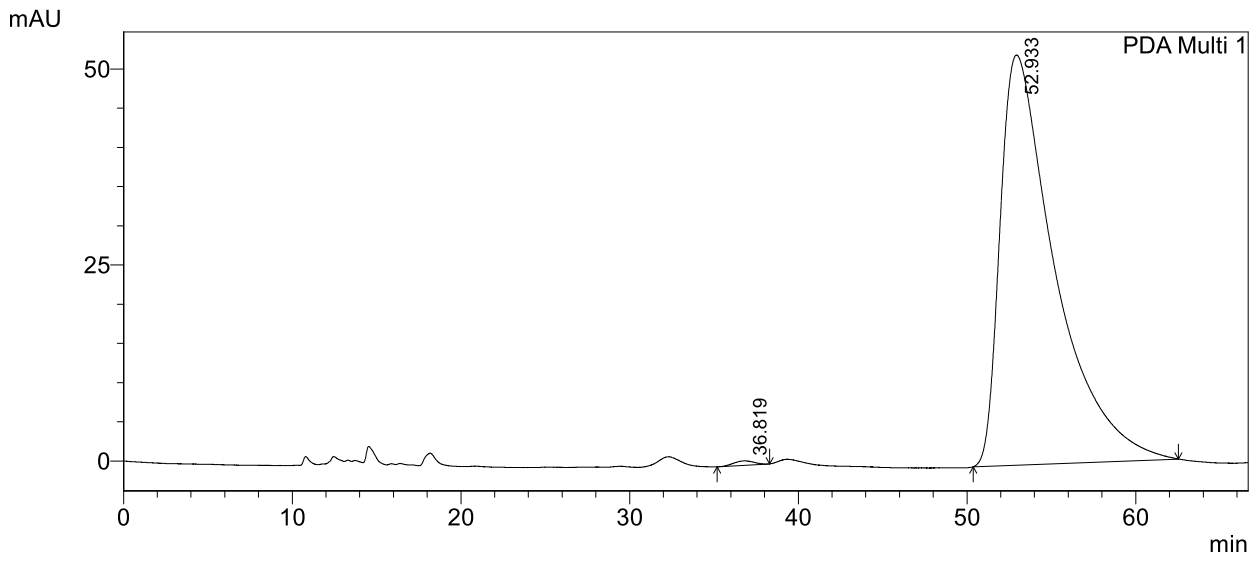

PeakTable

PDA Ch1 254nm 4nm

| Peak# | Ret. Time | Area     | Height | Area %  | Height % |
|-------|-----------|----------|--------|---------|----------|
| 1     | 36.819    | 46161    | 571    | 0.389   | 1.081    |
| 2     | 52.933    | 11817784 | 52305  | 99.611  | 98.919   |
| Total |           | 11863945 | 52876  | 100.000 | 100.000  |

1b

<Chromatogram>

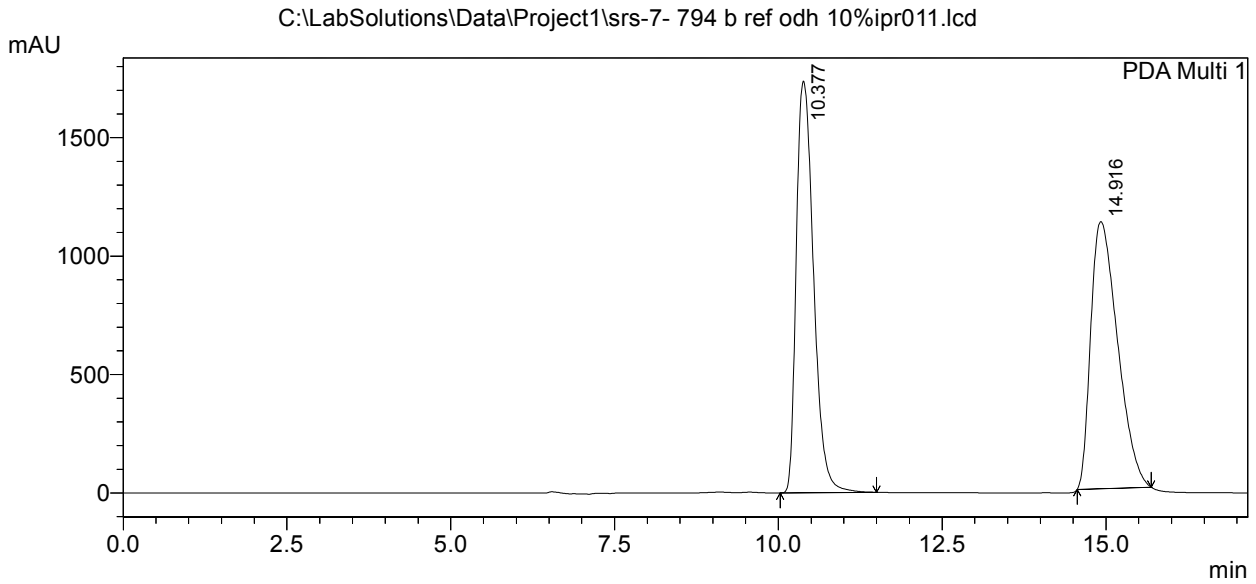

PeakTable

PDA Ch1 254nm 4nm

| Peak# | Ret. Time | Area     | Height  | Area %  | Height % |
|-------|-----------|----------|---------|---------|----------|
| 1     | 10.377    | 31942172 | 1738140 | 49.810  | 60.630   |
| 2     | 14.916    | 32186004 | 1128662 | 50.190  | 39.370   |
| Total |           | 64128176 | 2866802 | 100.000 | 100.000  |

<Chromatogram>

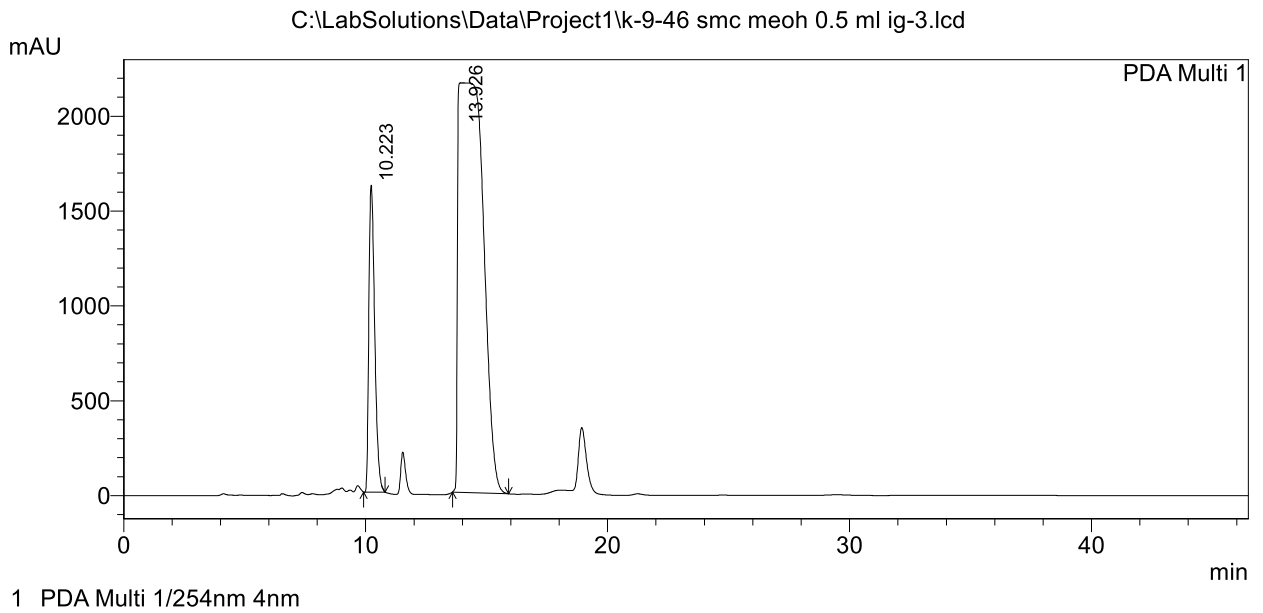

PeakTable

PDA Ch1 254nm 4nm

| Peak# | Ret. Time | Area      | Height  | Area %  | Height % |
|-------|-----------|-----------|---------|---------|----------|
| 1     | 10.223    | 27274631  | 1619262 | 14.961  | 42.860   |
| 2     | 13.926    | 155033052 | 2158732 | 85.039  | 57.140   |
| Total |           | 182307683 | 3777995 | 100.000 | 100.000  |

<Chromatogram>

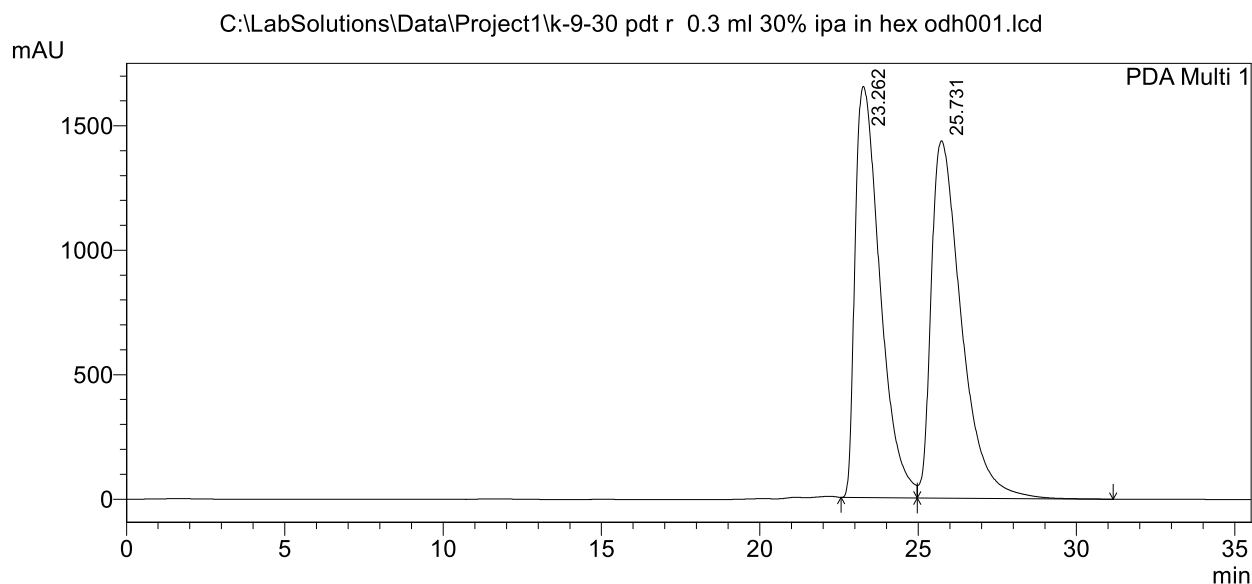

1 PDA Multi 1/254nm 4nm

PeakTable

PDA Ch1 254nm 4nm

| Peak# | Ret. Time | Area      | Height  | Area %  | Height % |
|-------|-----------|-----------|---------|---------|----------|
| 1     | 23.262    | 90779424  | 1652170 | 48.757  | 53.506   |
| 2     | 25.731    | 95408895  | 1435667 | 51.243  | 46.494   |
| Total |           | 186188319 | 3087838 | 100.000 | 100.000  |

<Chromatogram>

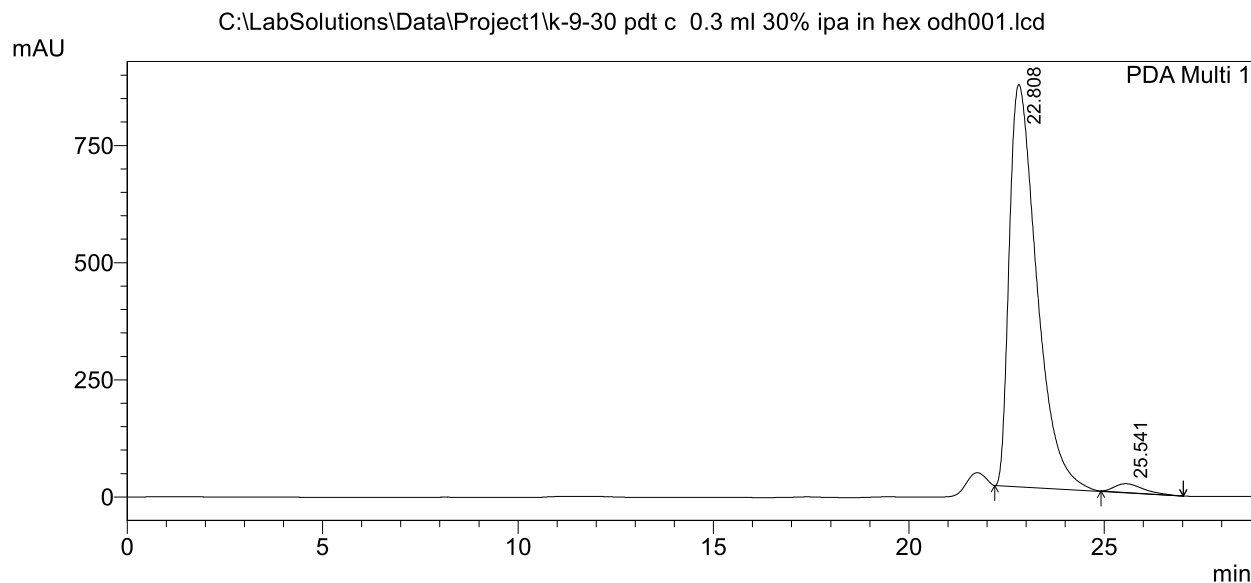

1 PDA Multi 1/254nm 4nm

PeakTable

PDA Ch1 254nm 4nm

| Peak# | Ret. Time | Area     | Height | Area %  | Height % |
|-------|-----------|----------|--------|---------|----------|
| 1     | 22.808    | 42186510 | 858262 | 97.801  | 97.871   |
| 2     | 25.541    | 948738   | 18669  | 2.199   | 2.129    |
| Total |           | 43135247 | 876931 | 100.000 | 100.000  |



<Chromatogram>

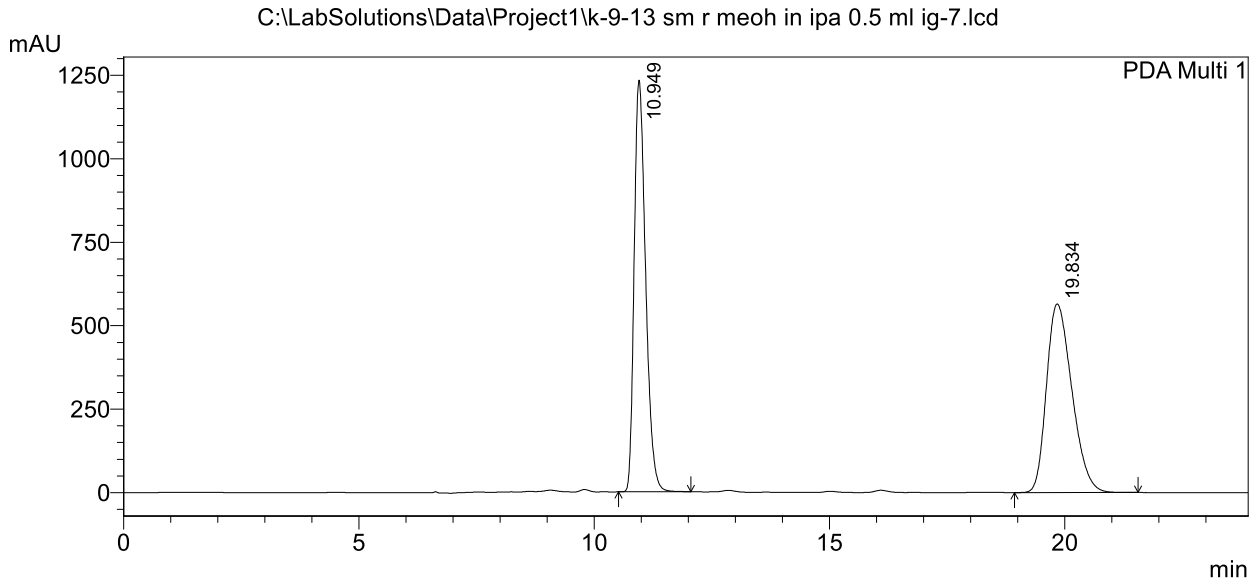

PeakTable

PDA Ch1 254nm 4nm

| Peak# | Ret. Time | Area     | Height  | Area %  | Height % |
|-------|-----------|----------|---------|---------|----------|
| 1     | 10.949    | 20823095 | 1232674 | 49.514  | 68.574   |
| 2     | 19.834    | 21232026 | 564899  | 50.486  | 31.426   |
| Total |           | 42055121 | 1797574 | 100.000 | 100.000  |

<Chromatogram>

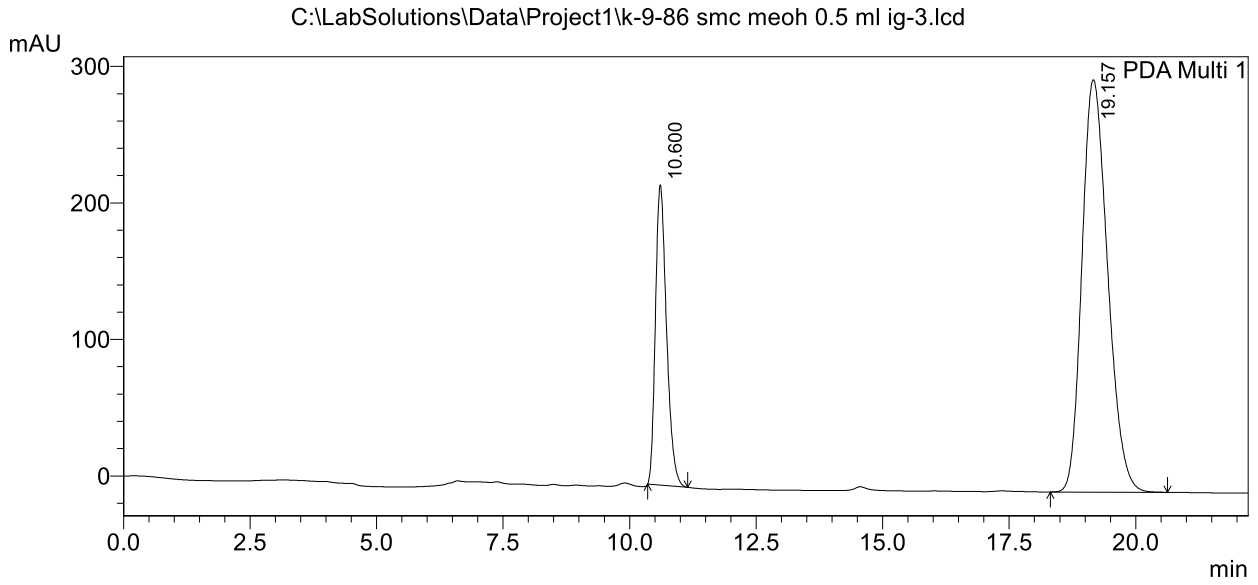

PeakTable

PDA Ch1 254nm 4nm

| Peak# | Ret. Time | Area     | Height | Area %  | Height % |
|-------|-----------|----------|--------|---------|----------|
| 1     | 10.600    | 3343908  | 220019 | 23.896  | 42.148   |
| 2     | 19.157    | 10649641 | 301993 | 76.104  | 57.852   |
| Total |           | 13993549 | 522011 | 100.000 | 100.000  |

<Chromatogram>

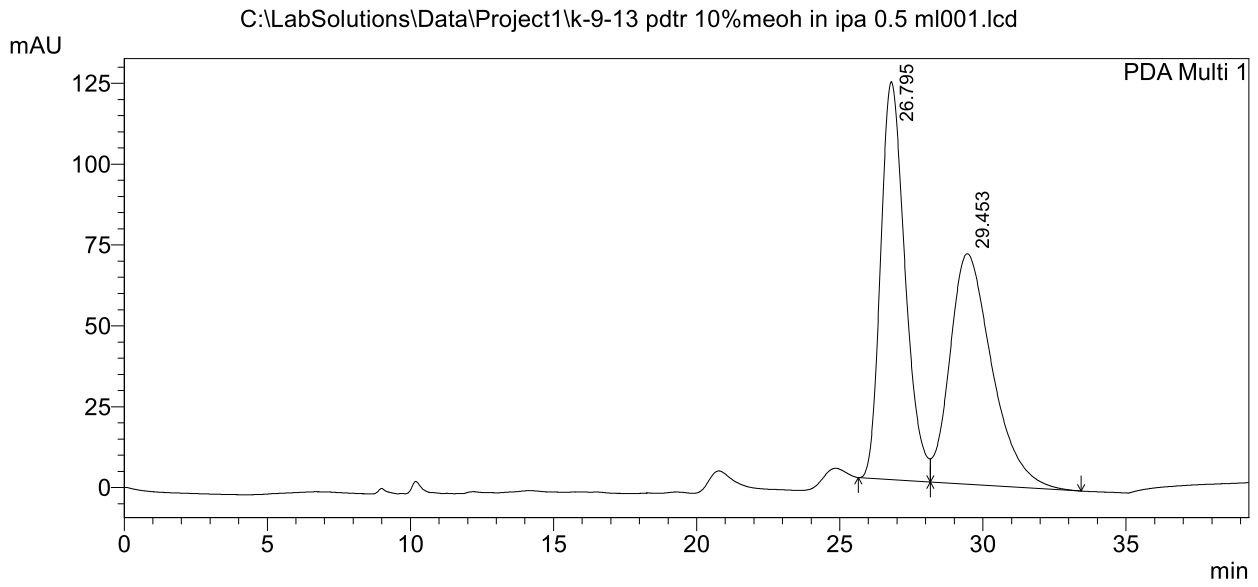

PeakTable

PDA Ch1 254nm 4nm

| Peak# | Ret. Time | Area     | Height | Area %  | Height % |
|-------|-----------|----------|--------|---------|----------|
| 1     | 26.795    | 7304027  | 123076 | 50.039  | 63.329   |
| 2     | 29.453    | 7292628  | 71268  | 49.961  | 36.671   |
| Total |           | 14596655 | 194344 | 100.000 | 100.000  |

<Chromatogram>

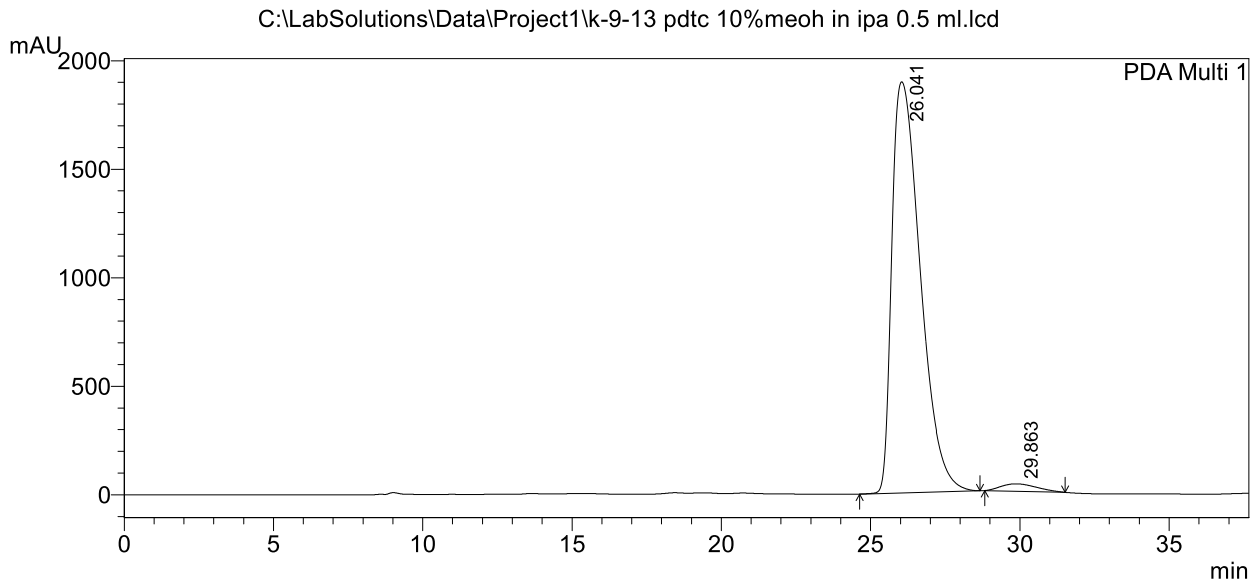

PeakTable

PDA Ch1 254nm 4nm

| Peak# | Ret. Time | Area      | Height  | Area %  | Height % |
|-------|-----------|-----------|---------|---------|----------|
| 1     | 26.041    | 124890607 | 1894775 | 97.759  | 98.221   |
| 2     | 29.863    | 2862803   | 34323   | 2.241   | 1.779    |
| Total |           | 127753409 | 1929098 | 100.000 | 100.000  |

## &lt;Chromatogram&gt;

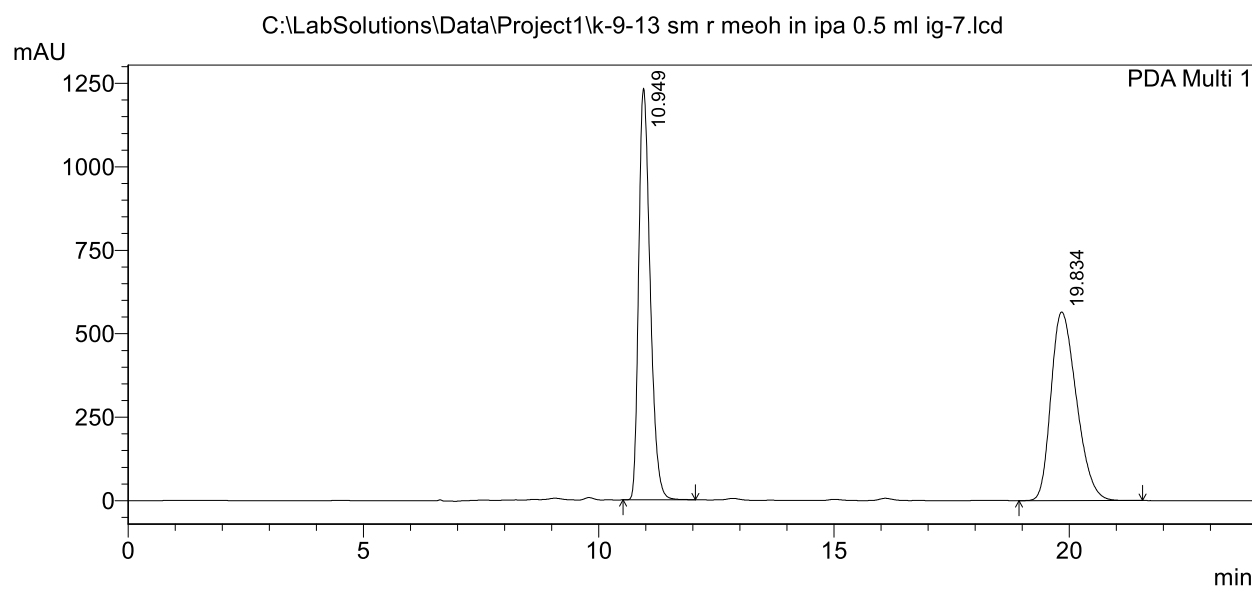

PeakTable

PDA Ch1 254nm 4nm

| Peak# | Ret. Time | Area     | Height  | Area %  | Height % |
|-------|-----------|----------|---------|---------|----------|
| 1     | 10.949    | 20823095 | 1232674 | 49.514  | 68.574   |
| 2     | 19.834    | 21232026 | 564899  | 50.486  | 31.426   |
| Total |           | 42055121 | 1797574 | 100.000 | 100.000  |

## &lt;Chromatogram&gt;

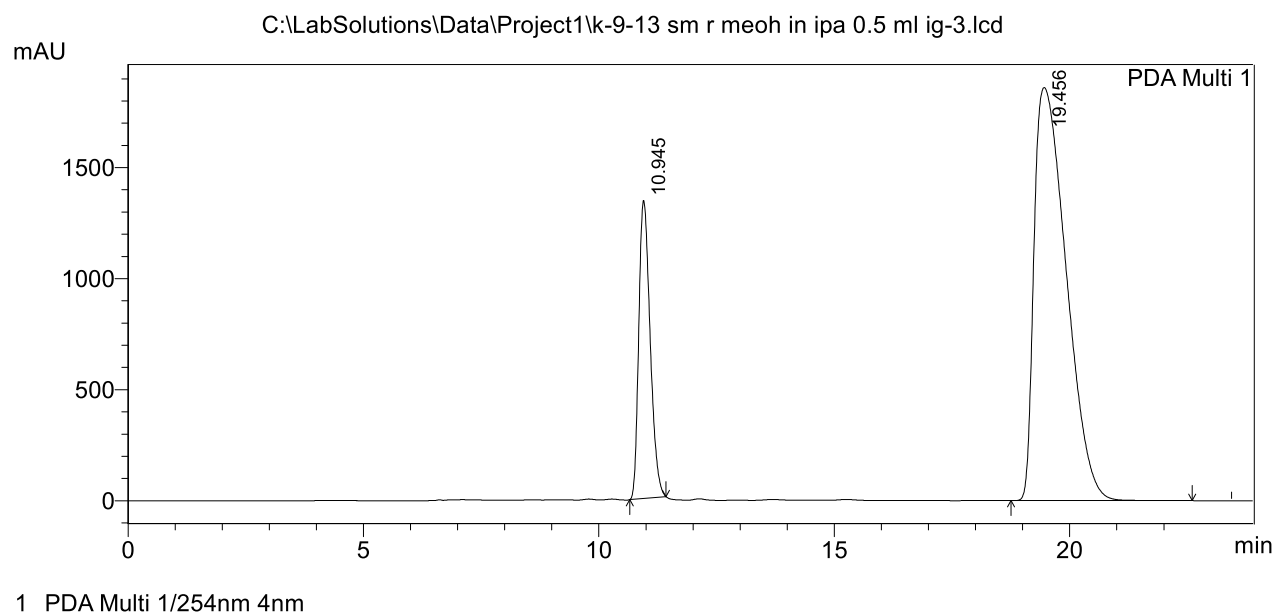

PeakTable

PDA Ch1 254nm 4nm

| Peak# | Ret. Time | Area      | Height  | Area %  | Height % |
|-------|-----------|-----------|---------|---------|----------|
| 1     | 10.945    | 22495714  | 1341695 | 20.344  | 41.911   |
| 2     | 19.456    | 88078916  | 1859586 | 79.656  | 58.089   |
| Total |           | 110574630 | 3201281 | 100.000 | 100.000  |

<Chromatogram>

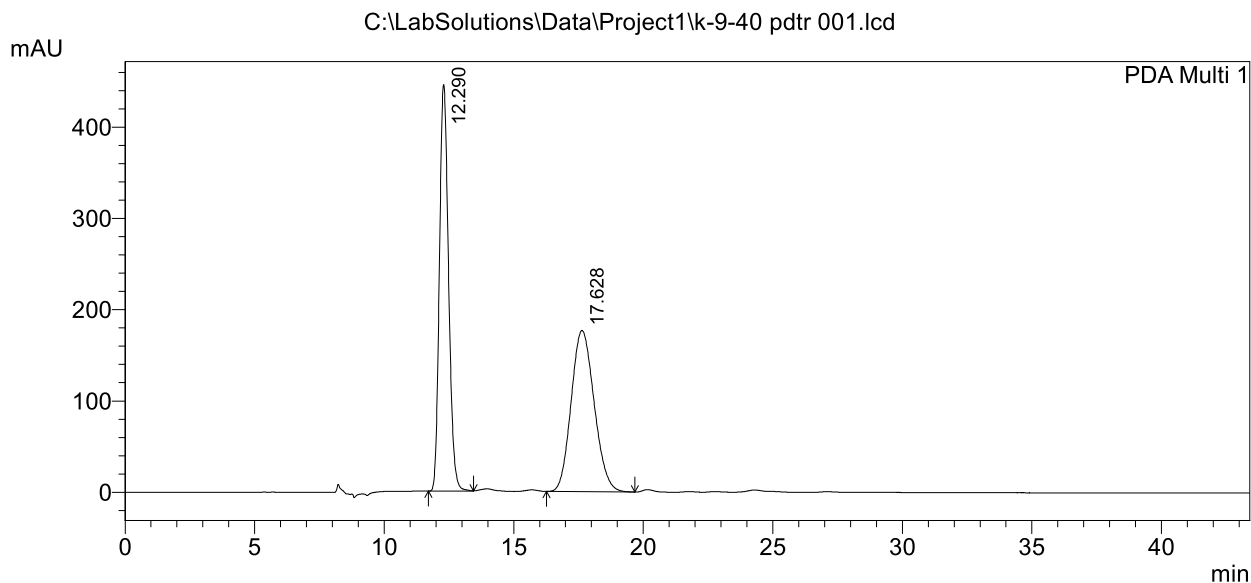

PeakTable

PDA Ch1 254nm 4nm

| Peak# | Ret. Time | Area     | Height | Area %  | Height % |
|-------|-----------|----------|--------|---------|----------|
| 1     | 12.290    | 10915918 | 445212 | 49.998  | 71.606   |
| 2     | 17.628    | 10916743 | 176543 | 50.002  | 28.394   |
| Total |           | 21832661 | 621755 | 100.000 | 100.000  |

<Chromatogram>

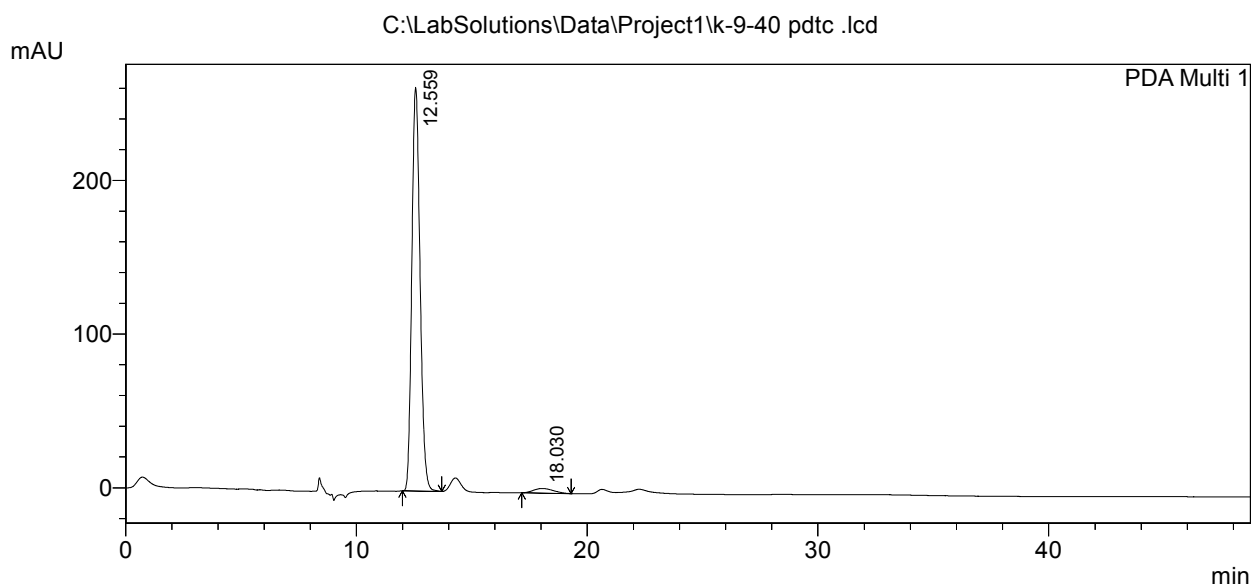

PeakTable

PDA Ch1 254nm 4nm

| Peak# | Ret. Time | Area    | Height | Area %  | Height % |
|-------|-----------|---------|--------|---------|----------|
| 1     | 12.559    | 6506348 | 262635 | 97.267  | 98.853   |
| 2     | 18.030    | 182849  | 3047   | 2.733   | 1.147    |
| Total |           | 6689198 | 265683 | 100.000 | 100.000  |

## &lt;Chromatogram&gt;

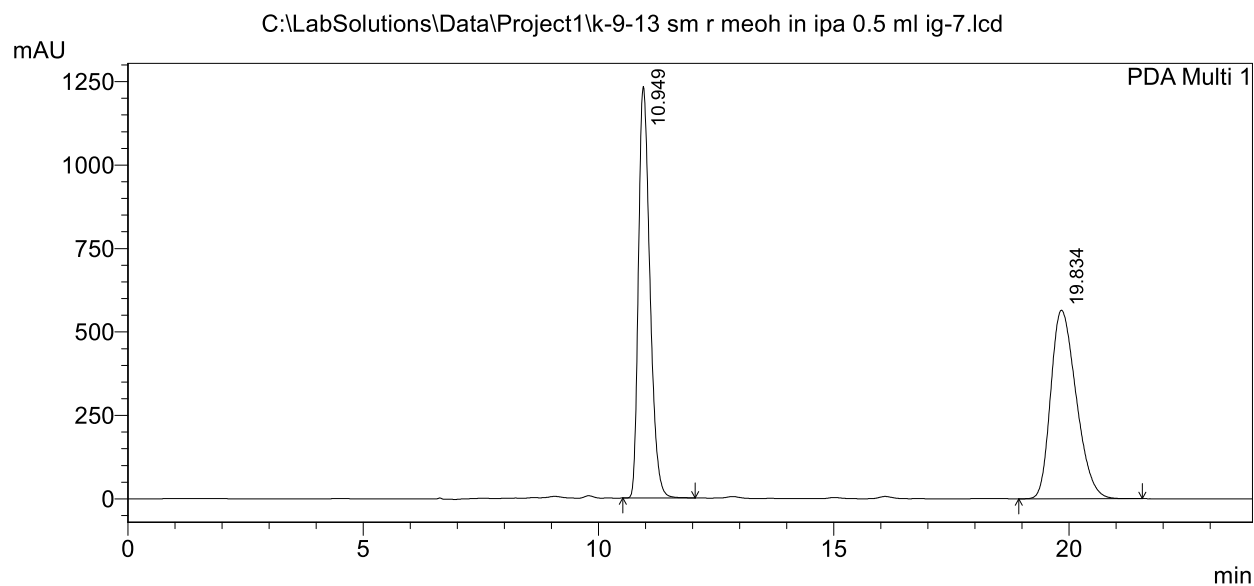

PeakTable

PDA Ch1 254nm 4nm

| Peak# | Ret. Time | Area     | Height  | Area %  | Height % |
|-------|-----------|----------|---------|---------|----------|
| 1     | 10.949    | 20823095 | 1232674 | 49.514  | 68.574   |
| 2     | 19.834    | 21232026 | 564899  | 50.486  | 31.426   |
| Total |           | 42055121 | 1797574 | 100.000 | 100.000  |

## &lt;Chromatogram&gt;

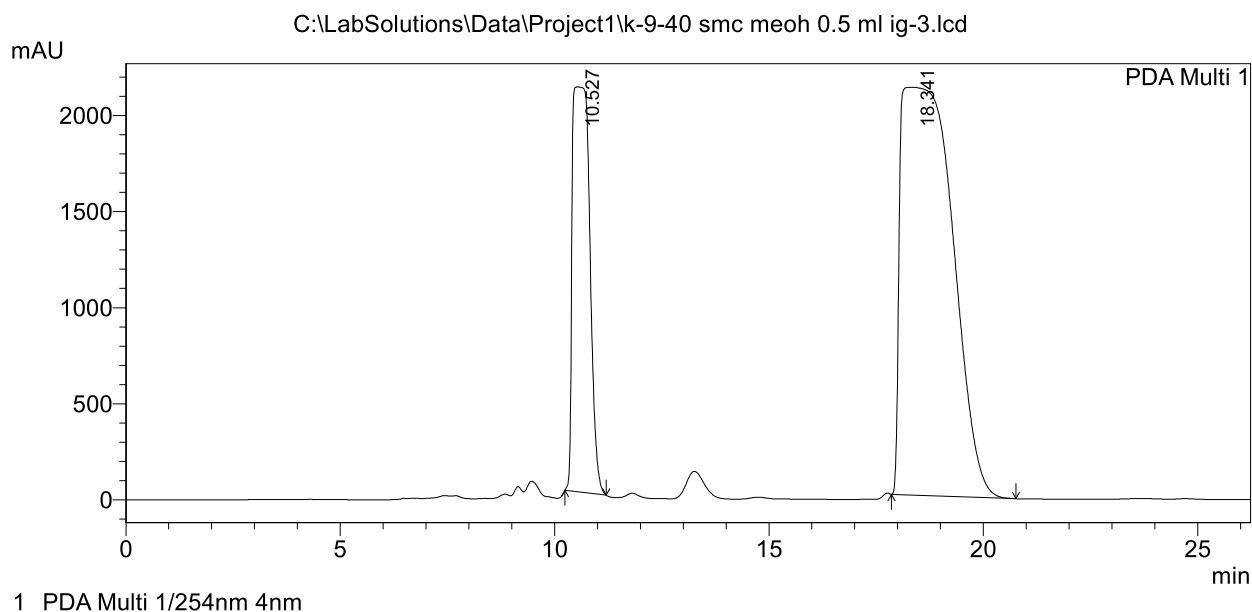

PeakTable

PDA Ch1 254nm 4nm

| Peak# | Ret. Time | Area      | Height  | Area %  | Height % |
|-------|-----------|-----------|---------|---------|----------|
| 1     | 10.527    | 59522228  | 2108454 | 24.931  | 49.832   |
| 2     | 18.341    | 179223549 | 2122649 | 75.069  | 50.168   |
| Total |           | 238745776 | 4231103 | 100.000 | 100.000  |

<Chromatogram>

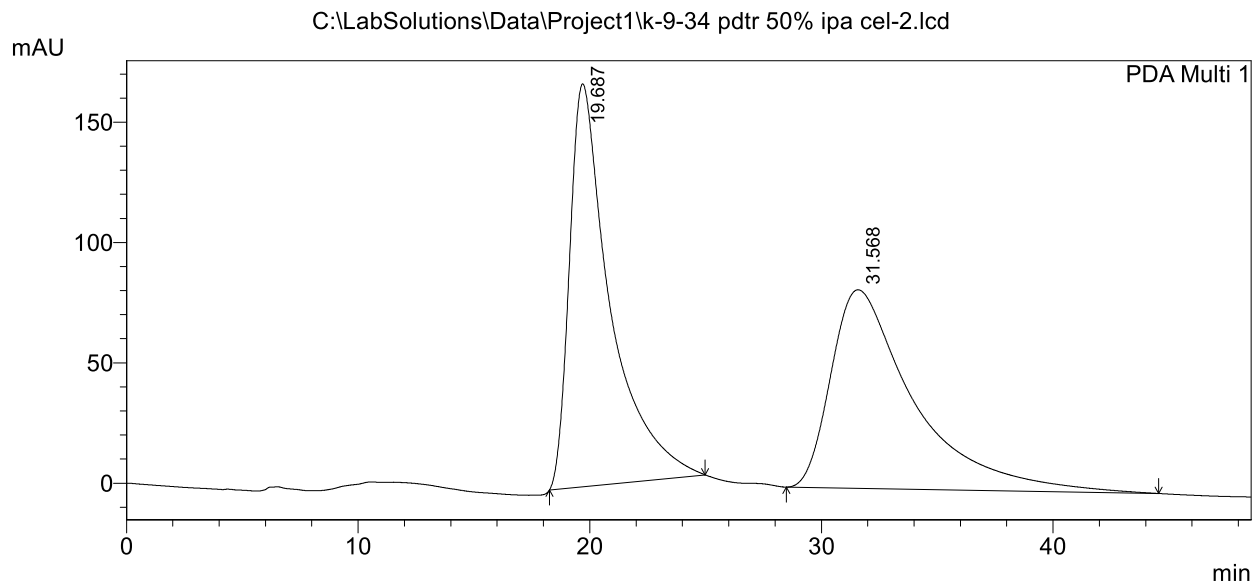

PeakTable

PDA Ch1 254nm 4nm

| Peak# | Ret. Time | Area     | Height | Area %  | Height % |
|-------|-----------|----------|--------|---------|----------|
| 1     | 19.687    | 20535896 | 167438 | 49.966  | 66.985   |
| 2     | 31.568    | 20563652 | 82527  | 50.034  | 33.015   |
| Total |           | 41099548 | 249965 | 100.000 | 100.000  |

<Chromatogram>

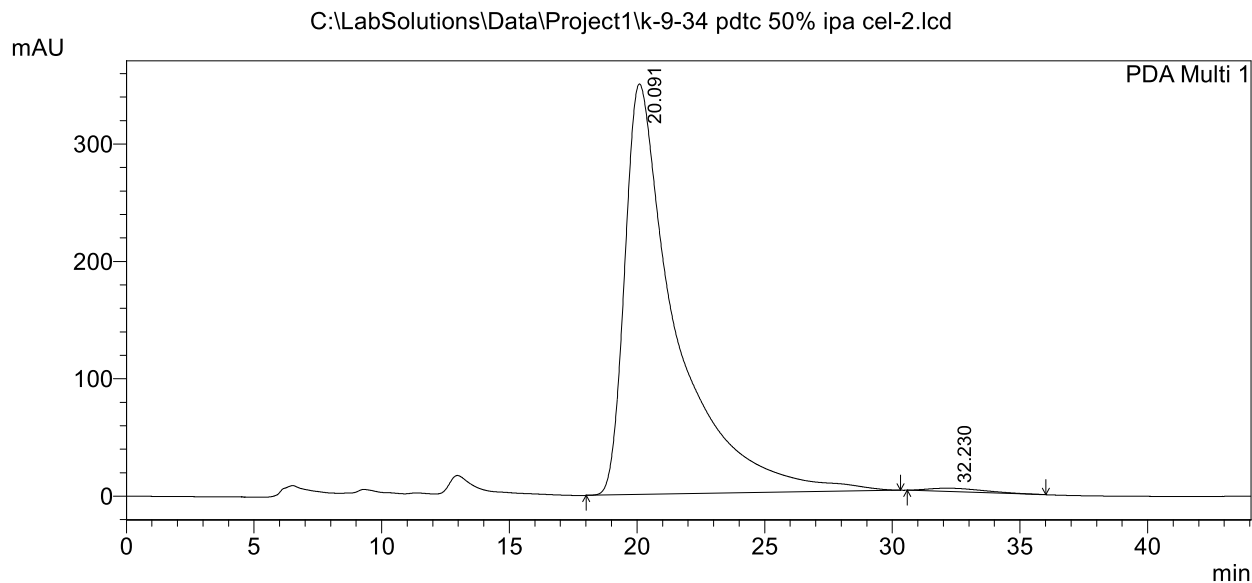

PeakTable

PDA Ch1 254nm 4nm

| Peak# | Ret. Time | Area     | Height | Area %  | Height % |
|-------|-----------|----------|--------|---------|----------|
| 1     | 20.091    | 49270866 | 349792 | 99.090  | 99.178   |
| 2     | 32.230    | 452604   | 2898   | 0.910   | 0.822    |
| Total |           | 49723471 | 352691 | 100.000 | 100.000  |

## &lt;Chromatogram&gt;

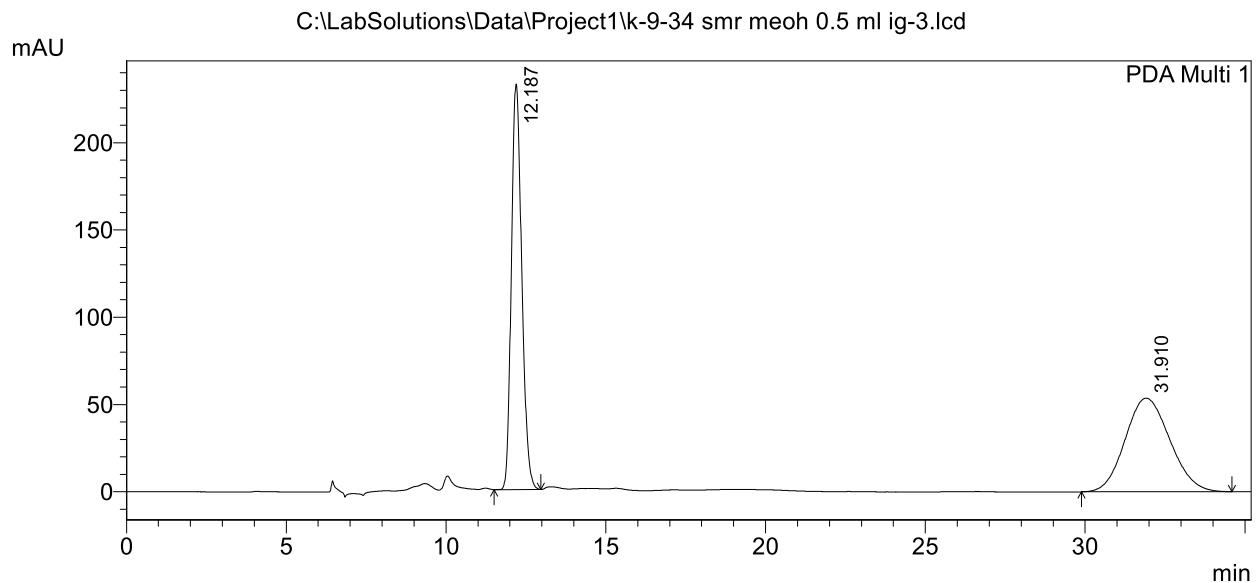

PeakTable

PDA Ch1 254nm 4nm

| Peak# | Ret. Time | Area     | Height | Area %  | Height % |
|-------|-----------|----------|--------|---------|----------|
| 1     | 12.187    | 5258040  | 232387 | 50.172  | 81.240   |
| 2     | 31.910    | 5222016  | 53663  | 49.828  | 18.760   |
| Total |           | 10480056 | 286050 | 100.000 | 100.000  |

## &lt;Chromatogram&gt;

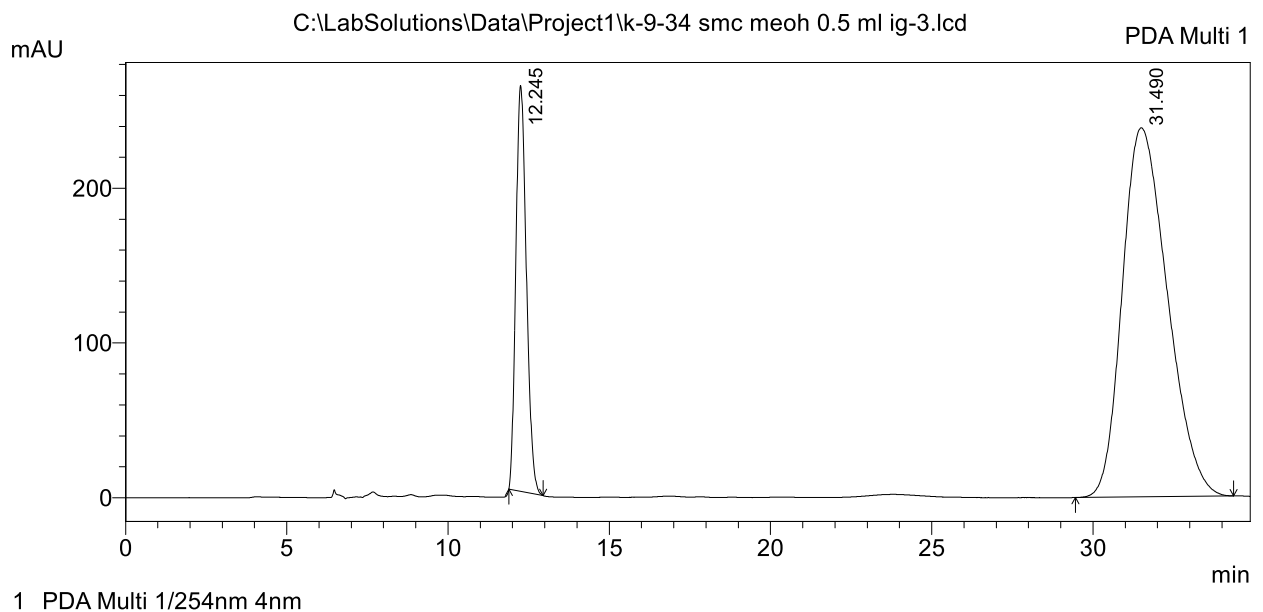

PeakTable

PDA Ch1 254nm 4nm

| Peak# | Ret. Time | Area     | Height | Area %  | Height % |
|-------|-----------|----------|--------|---------|----------|
| 1     | 12.245    | 5957283  | 262219 | 20.443  | 52.364   |
| 2     | 31.490    | 23183972 | 238538 | 79.557  | 47.636   |
| Total |           | 29141255 | 500757 | 100.000 | 100.000  |

<Chromatogram>

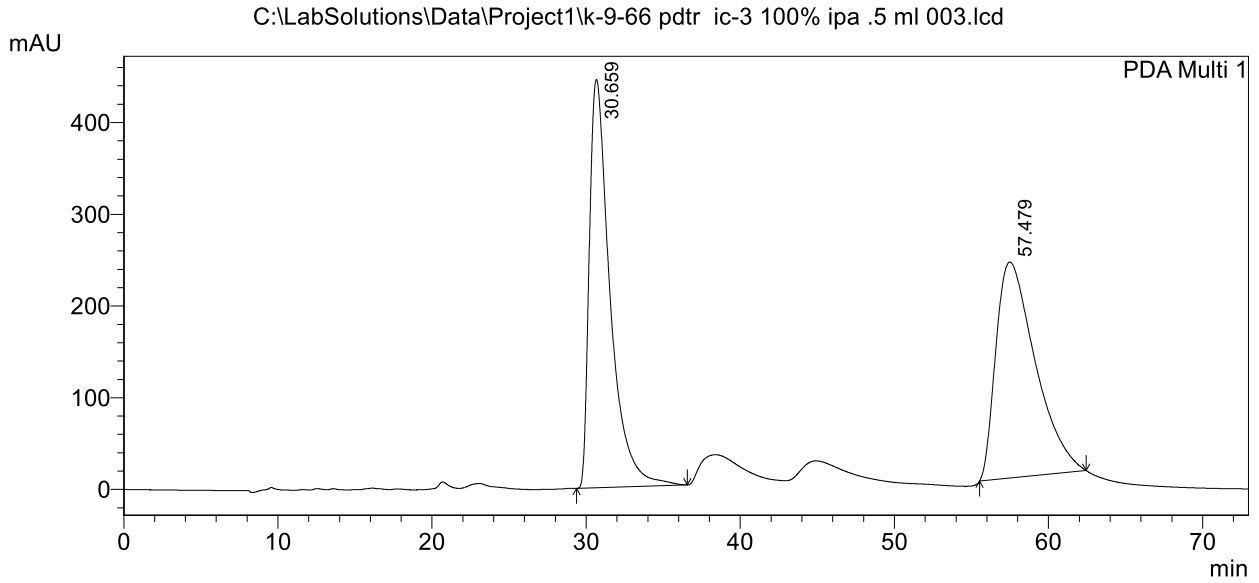

PeakTable

PDA Ch1 254nm 4nm

| Peak# | Ret. Time | Area     | Height | Area %  | Height % |
|-------|-----------|----------|--------|---------|----------|
| 1     | 30.659    | 41675561 | 445245 | 49.880  | 65.387   |
| 2     | 57.479    | 41875415 | 235696 | 50.120  | 34.613   |
| Total |           | 83550976 | 680941 | 100.000 | 100.000  |

<Chromatogram>

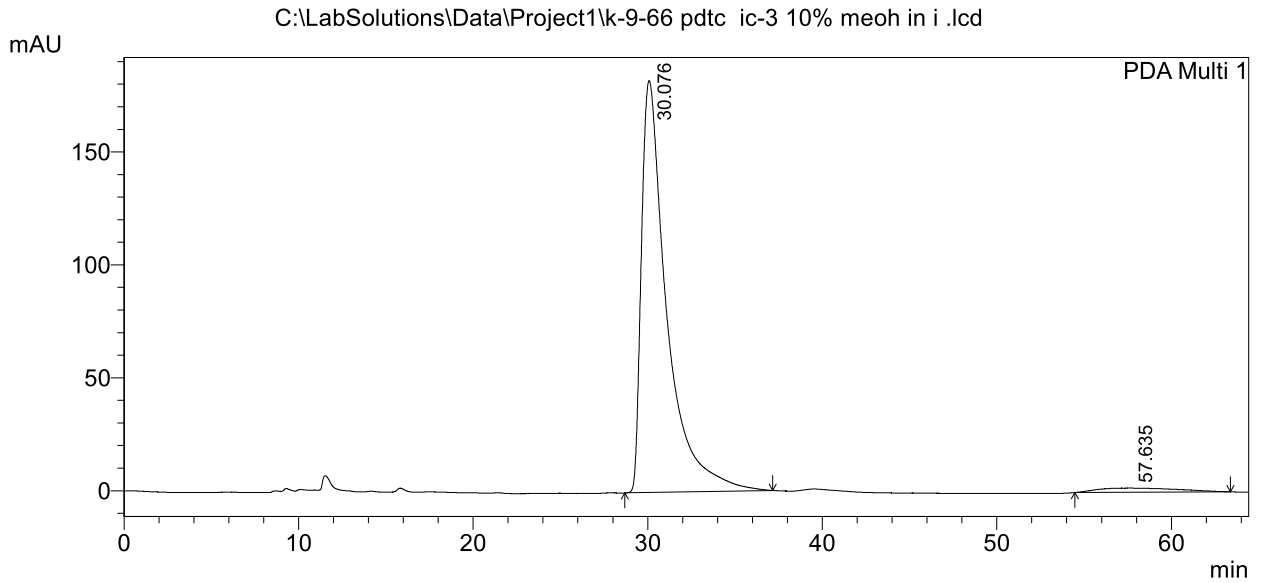

PeakTable

PDA Ch1 254nm 4nm

| Peak# | Ret. Time | Area     | Height | Area %  | Height % |
|-------|-----------|----------|--------|---------|----------|
| 1     | 30.076    | 18403395 | 182384 | 96.853  | 98.991   |
| 2     | 57.635    | 598034   | 1860   | 3.147   | 1.009    |
| Total |           | 19001429 | 184244 | 100.000 | 100.000  |



1e

<Chromatogram>

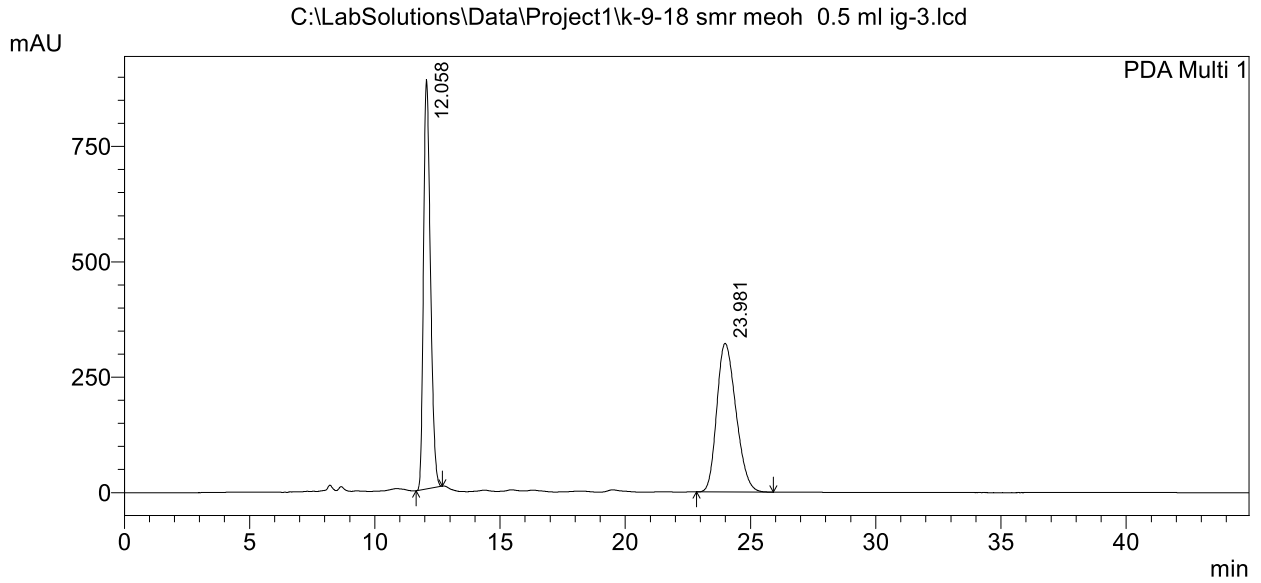

PeakTable

PDA Ch1 254nm 4nm

| Peak# | Ret. Time | Area     | Height  | Area %  | Height % |
|-------|-----------|----------|---------|---------|----------|
| 1     | 12.058    | 17027354 | 887124  | 49.775  | 73.369   |
| 2     | 23.981    | 17181586 | 322003  | 50.225  | 26.631   |
| Total |           | 34208940 | 1209126 | 100.000 | 100.000  |

<Chromatogram>

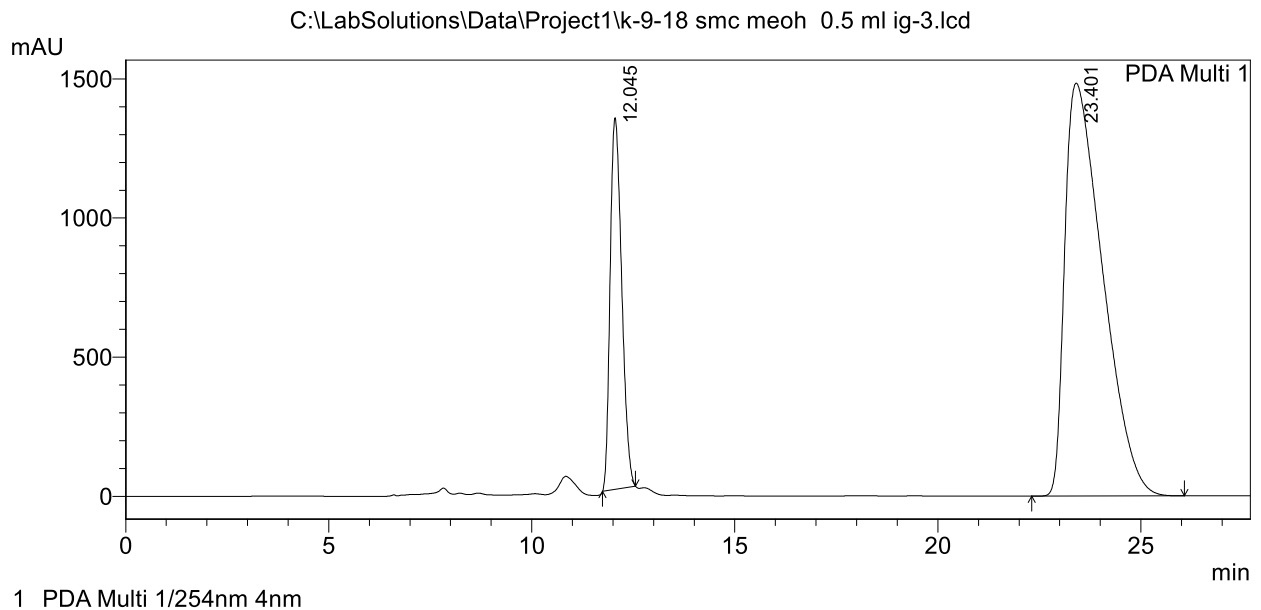

PeakTable

PDA Ch1 254nm 4nm

| Peak# | Ret. Time | Area      | Height  | Area %  | Height % |
|-------|-----------|-----------|---------|---------|----------|
| 1     | 12.045    | 26400130  | 1336119 | 21.534  | 47.381   |
| 2     | 23.401    | 96198799  | 1483842 | 78.466  | 52.619   |
| Total |           | 122598929 | 2819961 | 100.000 | 100.000  |

<Chromatogram>

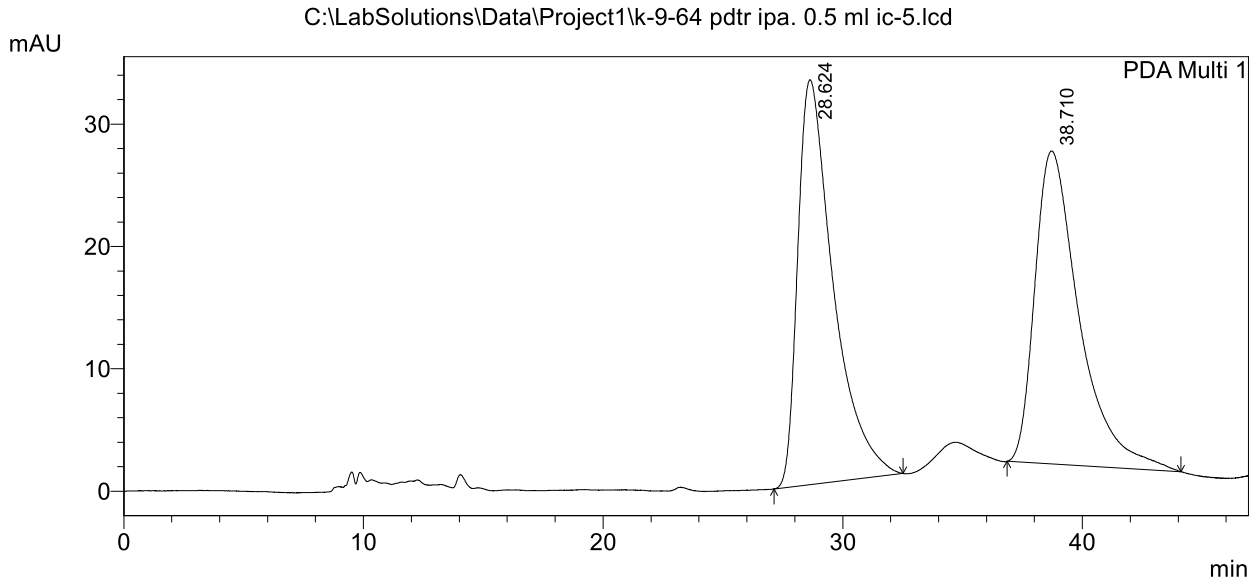

1 PDA Multi 1/254nm 4nm

PeakTable

PDA Ch1 254nm 4nm

| Peak# | Ret. Time | Area    | Height | Area %  | Height % |
|-------|-----------|---------|--------|---------|----------|
| 1     | 28.624    | 3412946 | 33092  | 50.934  | 56.394   |
| 2     | 38.710    | 3287803 | 25588  | 49.066  | 43.606   |
| Total |           | 6700749 | 58681  | 100.000 | 100.000  |

<Chromatogram>

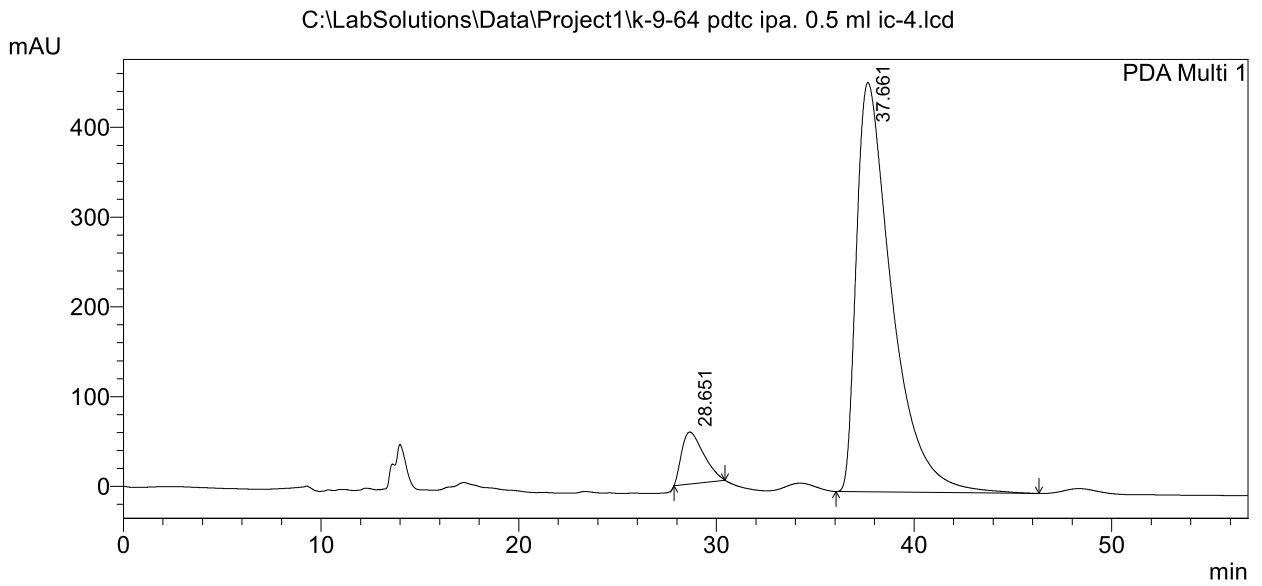

1 PDA Multi 1/254nm 4nm

PeakTable

PDA Ch1 254nm 4nm

| Peak# | Ret. Time | Area     | Height | Area %  | Height % |
|-------|-----------|----------|--------|---------|----------|
| 1     | 28.651    | 4464027  | 57867  | 7.273   | 11.259   |
| 2     | 37.661    | 56912944 | 456077 | 92.727  | 88.741   |
| Total |           | 61376971 | 513944 | 100.000 | 100.000  |

<Chromatogram>

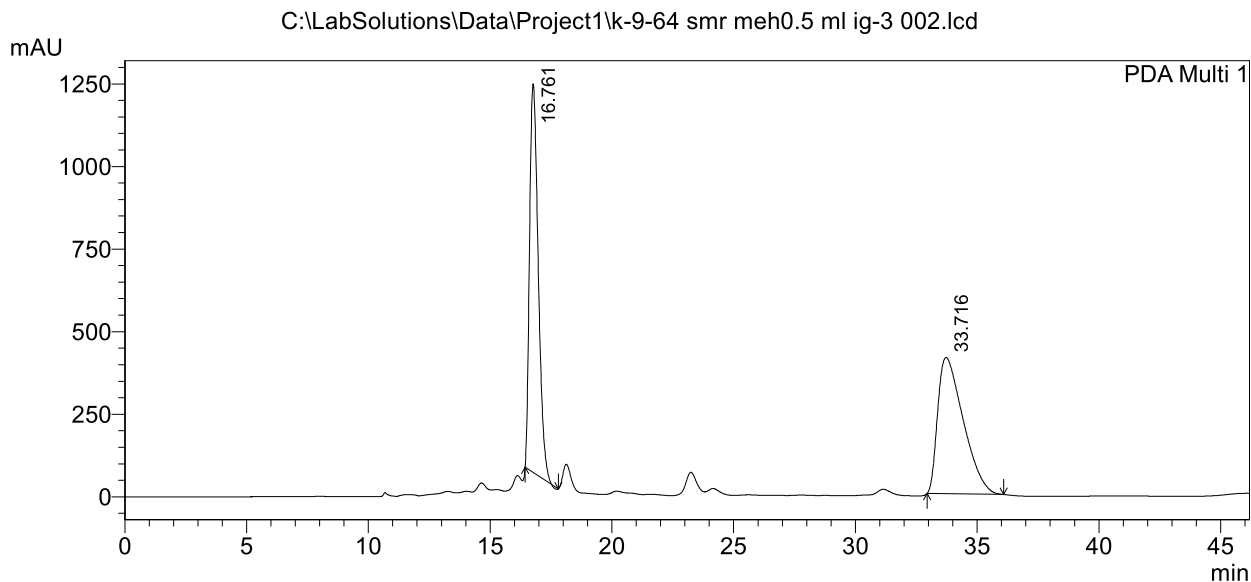

PeakTable

PDA Ch1 254nm 4nm

| Peak# | Ret. Time | Area     | Height  | Area %  | Height % |
|-------|-----------|----------|---------|---------|----------|
| 1     | 16.761    | 29212575 | 1175965 | 49.290  | 74.038   |
| 2     | 33.716    | 30053593 | 412369  | 50.710  | 25.962   |
| Total |           | 59266167 | 1588335 | 100.000 | 100.000  |

<Chromatogram>

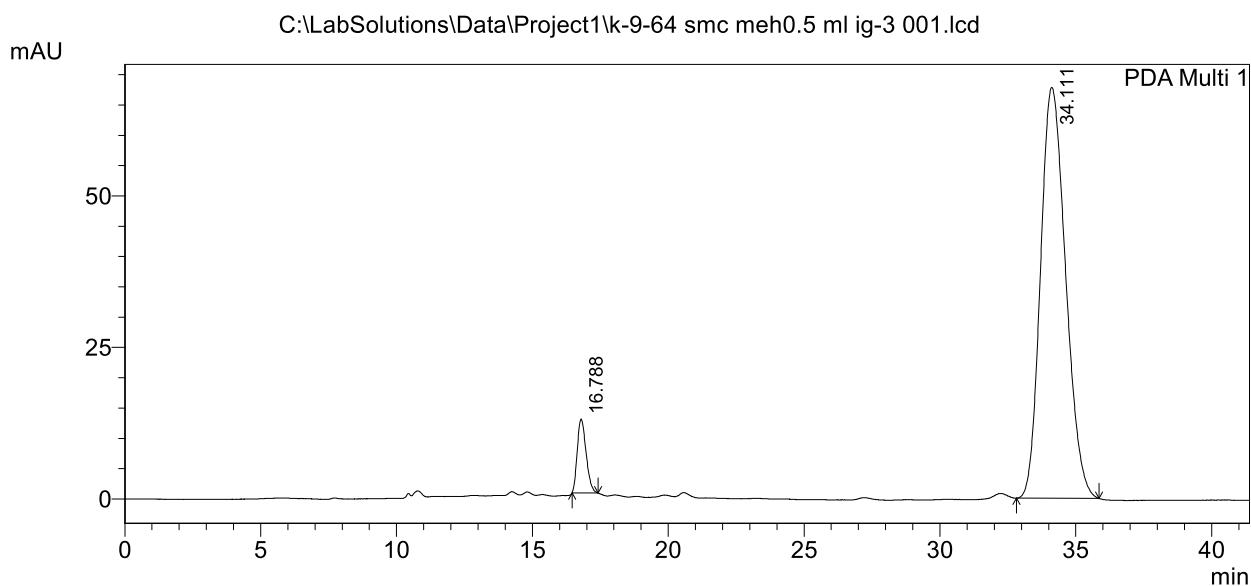

PeakTable

PDA Ch1 254nm 4nm

| Peak# | Ret. Time | Area    | Height | Area %  | Height % |
|-------|-----------|---------|--------|---------|----------|
| 1     | 16.788    | 276605  | 12214  | 5.975   | 15.269   |
| 2     | 34.111    | 4352747 | 67782  | 94.025  | 84.731   |
| Total |           | 4629352 | 79996  | 100.000 | 100.000  |

<Chromatogram>

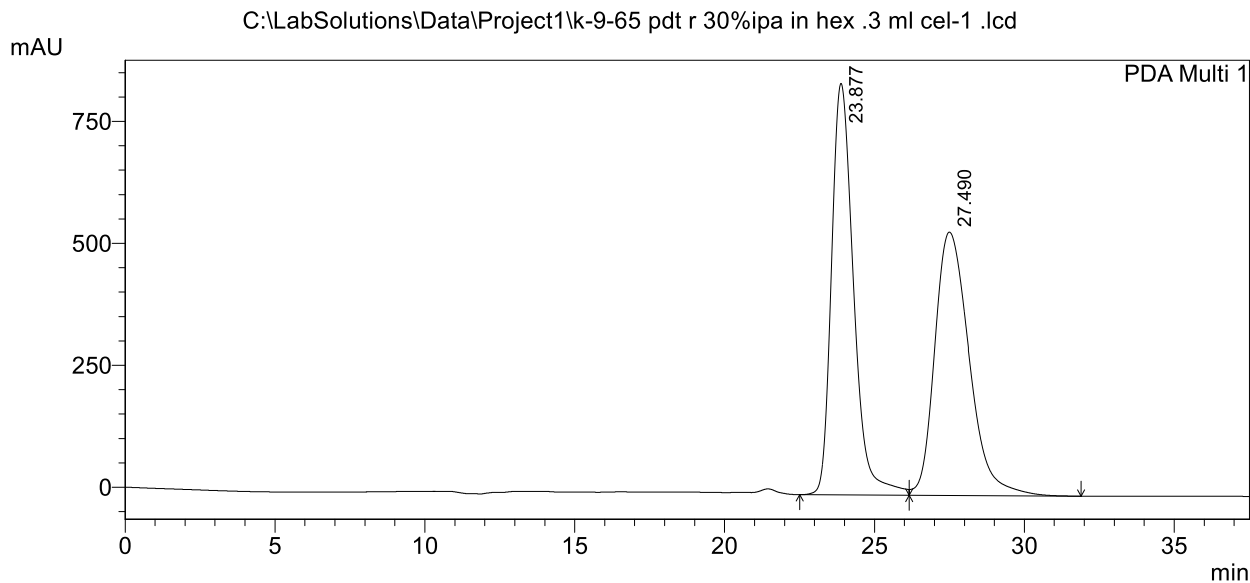

PeakTable

PDA Ch1 254nm 4nm

| Peak# | Ret. Time | Area     | Height  | Area %  | Height % |
|-------|-----------|----------|---------|---------|----------|
| 1     | 23.877    | 43176033 | 843741  | 49.886  | 60.974   |
| 2     | 27.490    | 43373983 | 540036  | 50.114  | 39.026   |
| Total |           | 86550016 | 1383777 | 100.000 | 100.000  |

<Chromatogram>

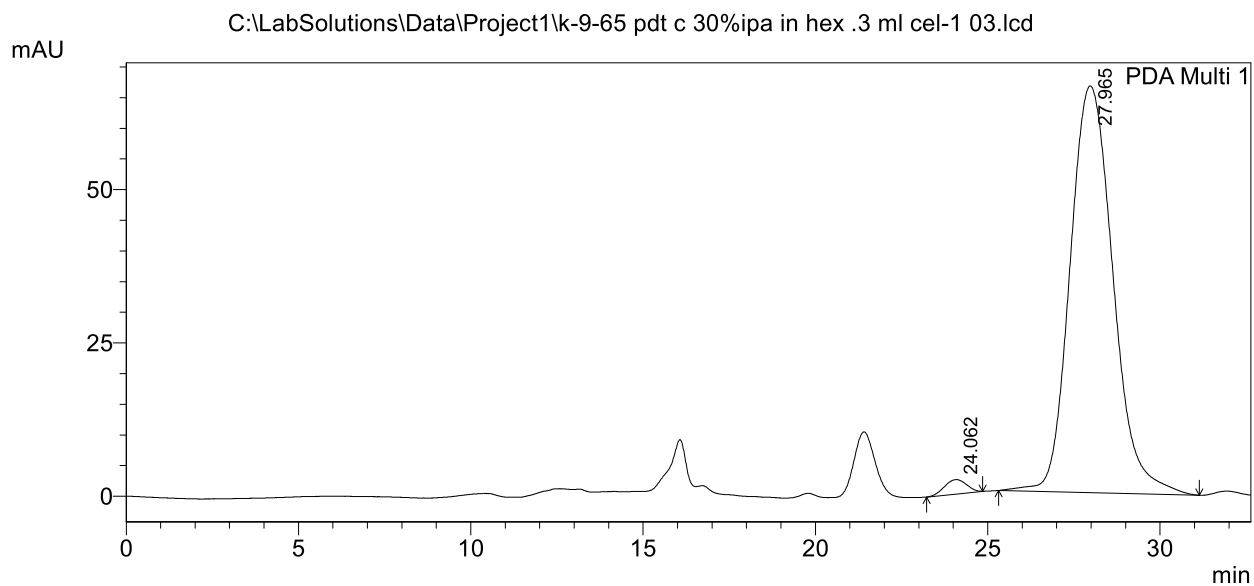

PeakTable

PDA Ch1 254nm 4nm

| Peak# | Ret. Time | Area    | Height | Area %  | Height % |
|-------|-----------|---------|--------|---------|----------|
| 1     | 24.062    | 106164  | 2369   | 1.812   | 3.449    |
| 2     | 27.965    | 5751505 | 66325  | 98.188  | 96.551   |
| Total |           | 5857669 | 68695  | 100.000 | 100.000  |

<Chromatogram>

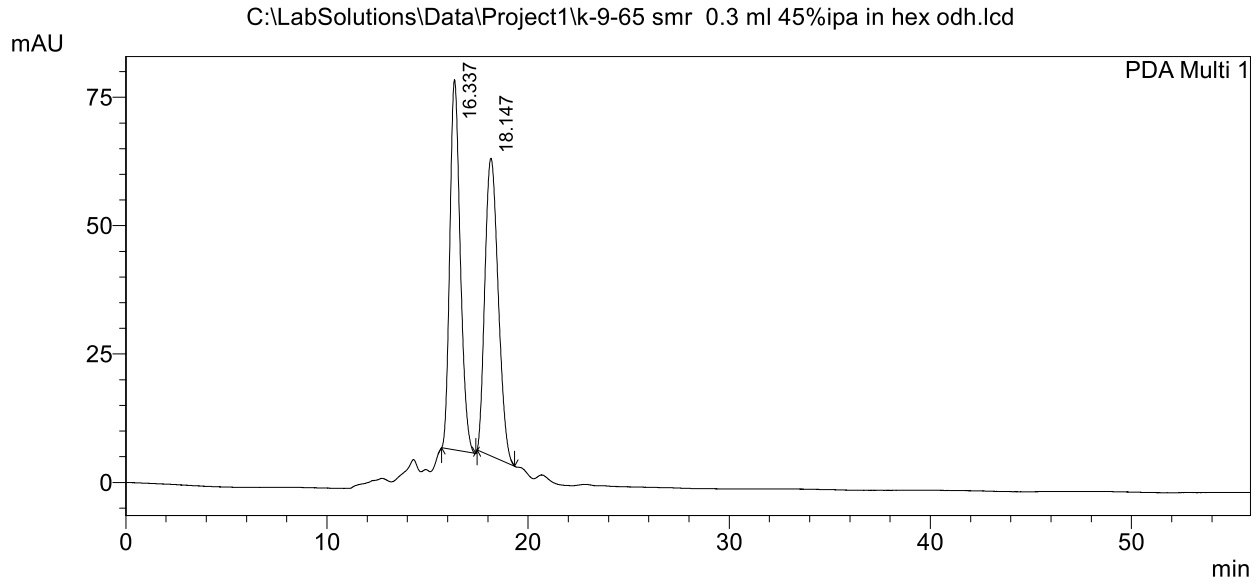

PeakTable

PDA Ch1 254nm 4nm

| Peak# | Ret. Time | Area    | Height | Area %  | Height % |
|-------|-----------|---------|--------|---------|----------|
| 1     | 16.337    | 2601539 | 72116  | 49.340  | 55.421   |
| 2     | 18.147    | 2671126 | 58008  | 50.660  | 44.579   |
| Total |           | 5272666 | 130124 | 100.000 | 100.000  |

<Chromatogram>

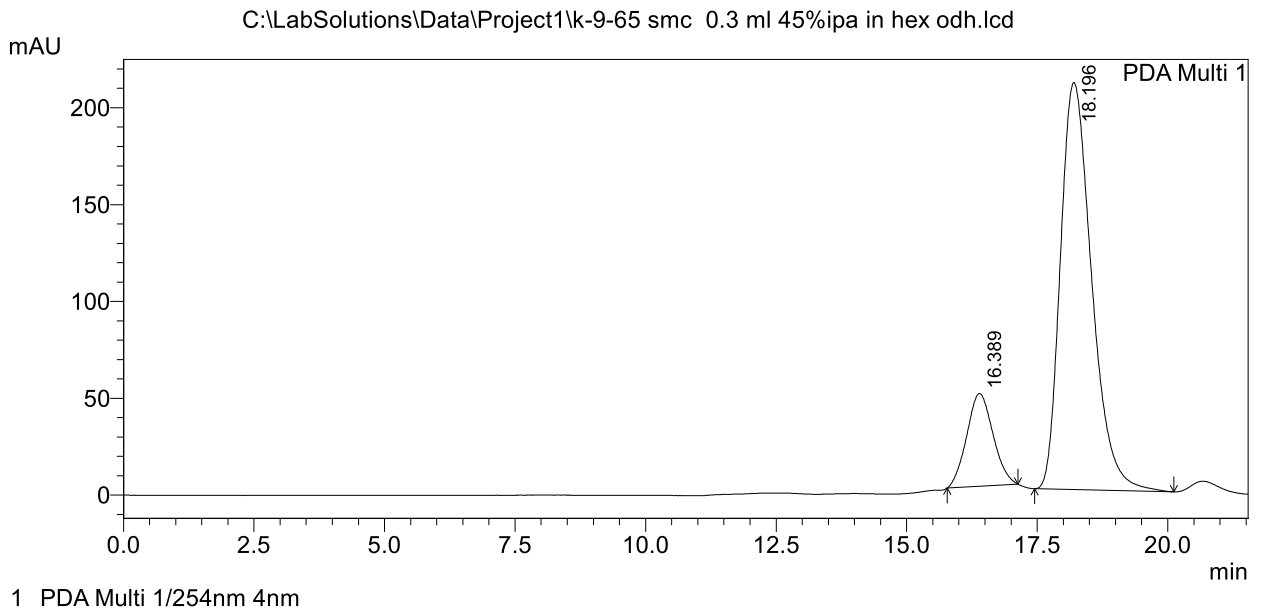

PeakTable

PDA Ch1 254nm 4nm

| Peak# | Ret. Time | Area     | Height | Area %  | Height % |
|-------|-----------|----------|--------|---------|----------|
| 1     | 16.389    | 1680814  | 47850  | 16.119  | 18.548   |
| 2     | 18.196    | 8747000  | 210132 | 83.881  | 81.452   |
| Total |           | 10427814 | 257981 | 100.000 | 100.000  |

<Chromatogram>

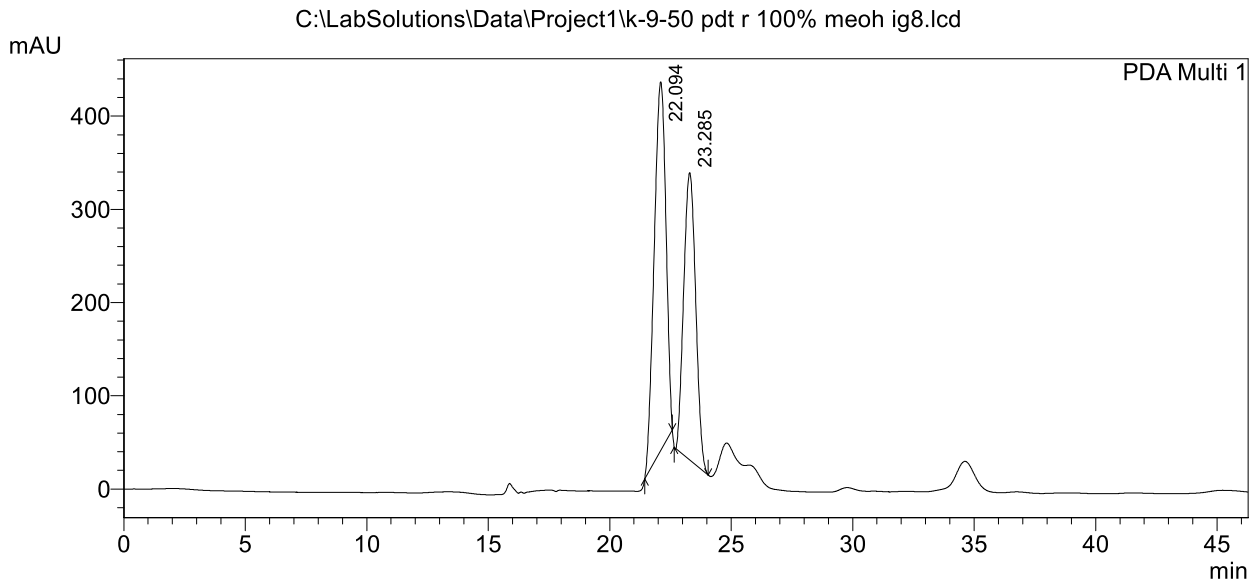

PeakTable

PDA Ch1 254nm 4nm

| Peak# | Ret. Time | Area     | Height | Area %  | Height % |
|-------|-----------|----------|--------|---------|----------|
| 1     | 22.094    | 13299126 | 395743 | 55.823  | 56.244   |
| 2     | 23.285    | 10524523 | 307871 | 44.177  | 43.756   |
| Total |           | 23823649 | 703614 | 100.000 | 100.000  |

<Chromatogram>

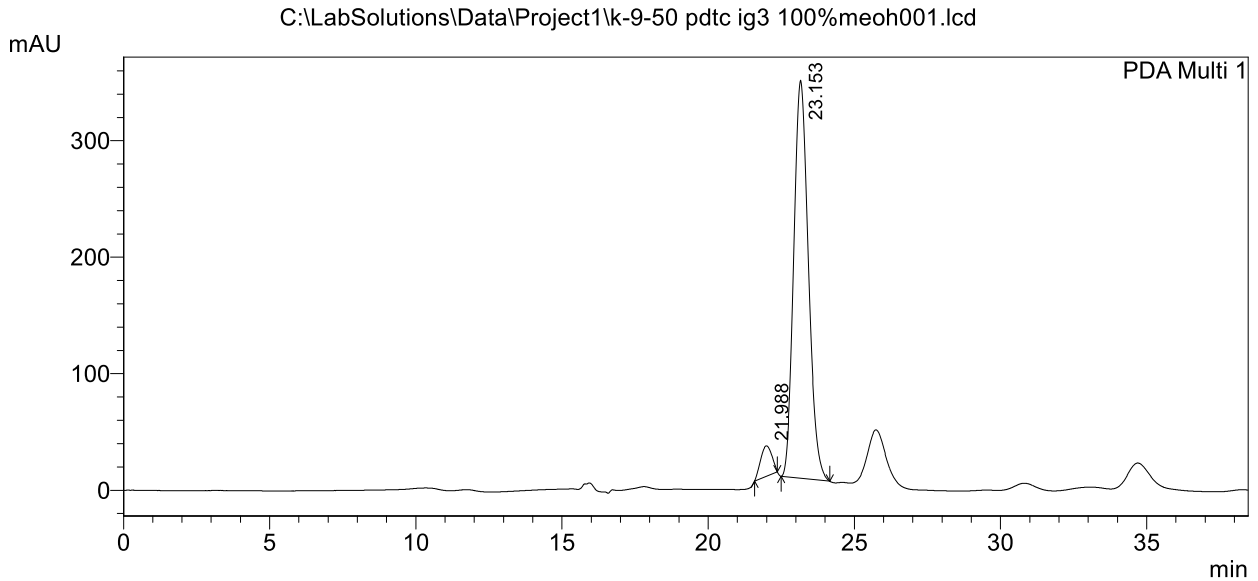

PeakTable

PDA Ch1 254nm 4nm

| Peak# | Ret. Time | Area     | Height | Area %  | Height % |
|-------|-----------|----------|--------|---------|----------|
| 1     | 21.988    | 699413   | 26146  | 5.553   | 7.109    |
| 2     | 23.153    | 11896041 | 341651 | 94.447  | 92.891   |
| Total |           | 12595454 | 367797 | 100.000 | 100.000  |

<Chromatogram>

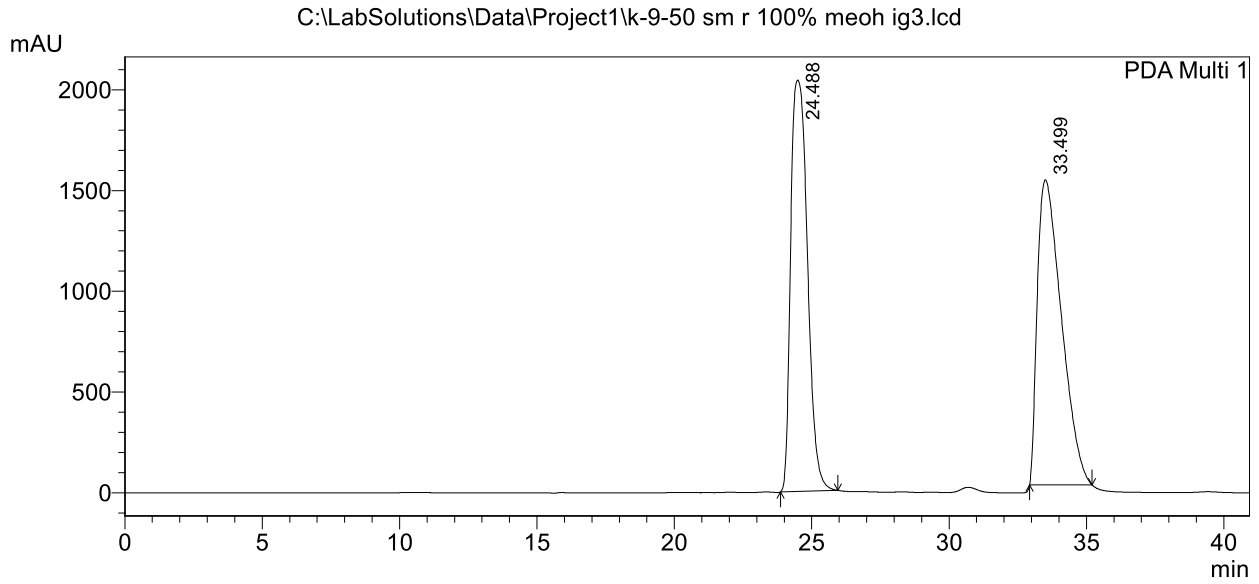

PeakTable

PDA Ch1 254nm 4nm

| Peak# | Ret. Time | Area      | Height  | Area %  | Height % |
|-------|-----------|-----------|---------|---------|----------|
| 1     | 24.488    | 86660501  | 2041877 | 48.480  | 57.416   |
| 2     | 33.499    | 92093321  | 1514387 | 51.520  | 42.584   |
| Total |           | 178753821 | 3556264 | 100.000 | 100.000  |

<Chromatogram>

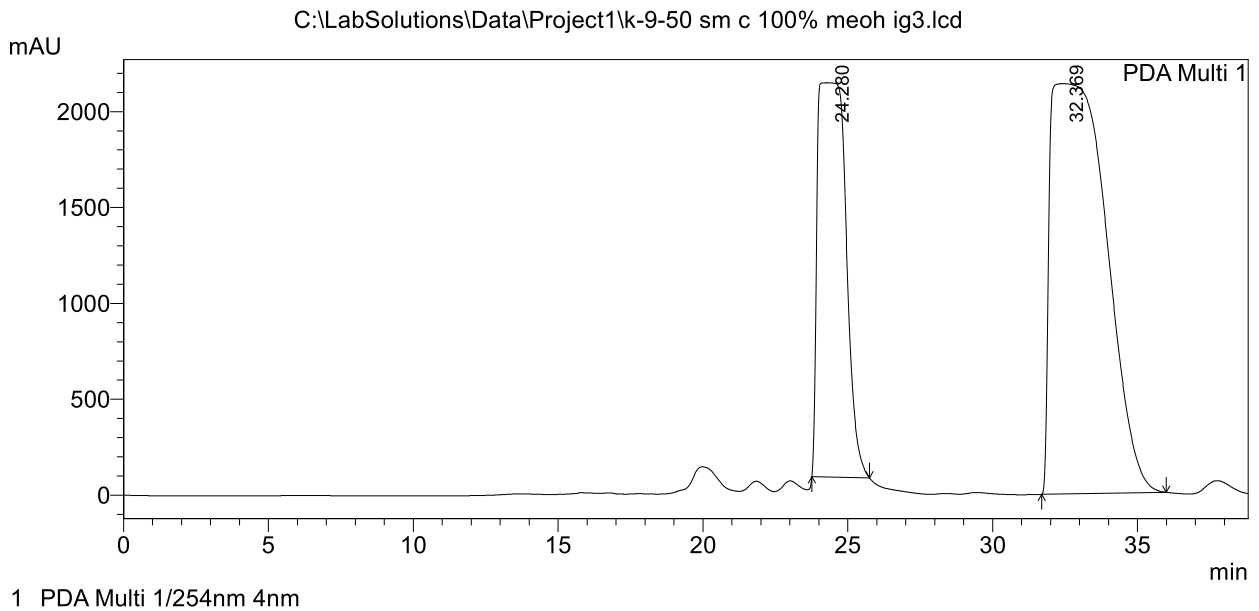

PeakTable

PDA Ch1 254nm 4nm

| Peak# | Ret. Time | Area      | Height  | Area %  | Height % |
|-------|-----------|-----------|---------|---------|----------|
| 1     | 24.280    | 139464780 | 2055180 | 32.601  | 48.980   |
| 2     | 32.369    | 288330639 | 2140754 | 67.399  | 51.020   |
| Total |           | 427795418 | 4195934 | 100.000 | 100.000  |

<Chromatogram>

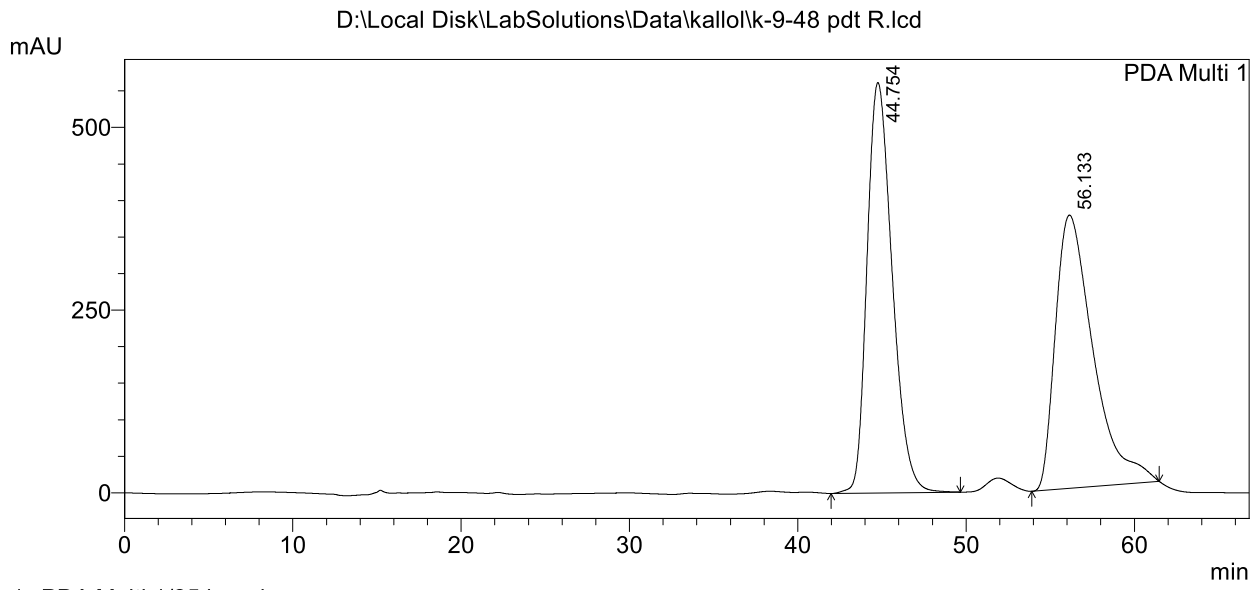

PeakTable

PDA Ch1 254nm 4nm

| Peak# | Ret. Time | Area      | Height | Area %  | Height % |
|-------|-----------|-----------|--------|---------|----------|
| 1     | 44.754    | 58479508  | 561698 | 50.036  | 60.021   |
| 2     | 56.133    | 58395815  | 374143 | 49.964  | 39.979   |
| Total |           | 116875323 | 935842 | 100.000 | 100.000  |

<Chromatogram>

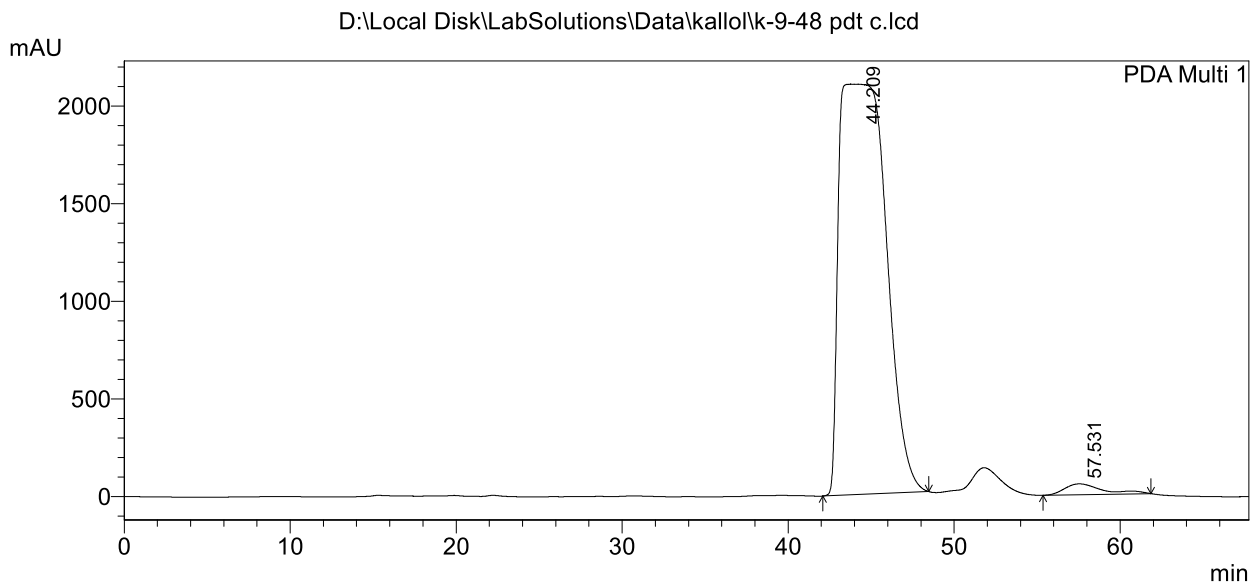

PeakTable

PDA Ch1 254nm 4nm

| Peak# | Ret. Time | Area      | Height  | Area %  | Height % |
|-------|-----------|-----------|---------|---------|----------|
| 1     | 44.209    | 413011528 | 2102714 | 97.890  | 97.424   |
| 2     | 57.531    | 8904257   | 55596   | 2.110   | 2.576    |
| Total |           | 421915785 | 2158311 | 100.000 | 100.000  |



<Chromatogram>

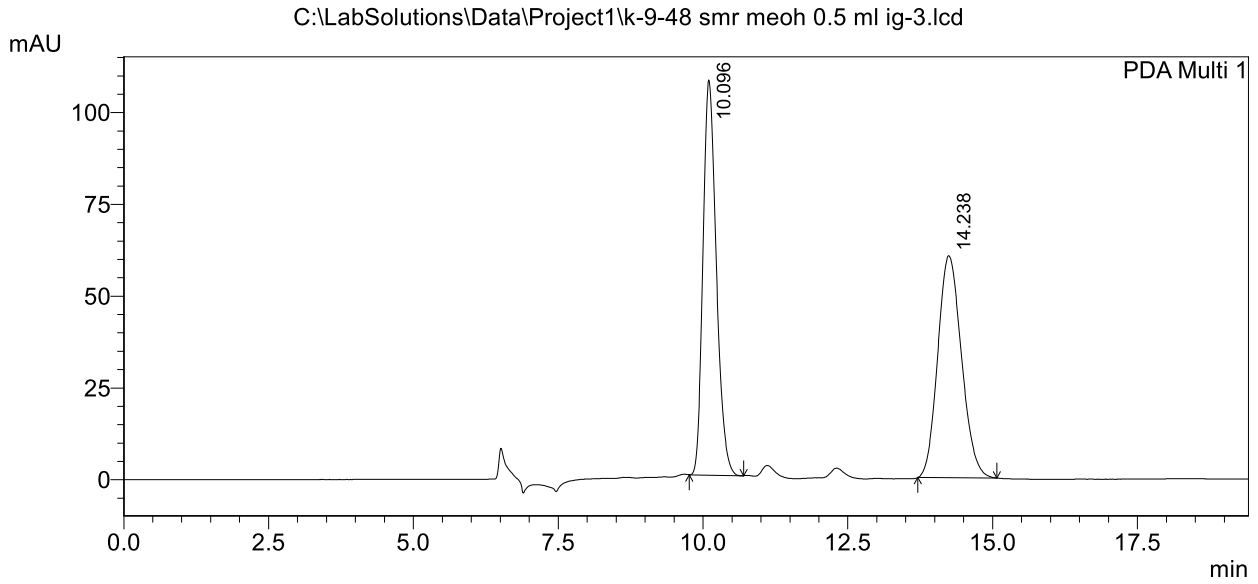

PeakTable

PDA Ch1 254nm 4nm

| Peak# | Ret. Time | Area    | Height | Area %  | Height % |
|-------|-----------|---------|--------|---------|----------|
| 1     | 10.096    | 1724157 | 107620 | 50.002  | 64.029   |
| 2     | 14.238    | 1723998 | 60460  | 49.998  | 35.971   |
| Total |           | 3448155 | 168080 | 100.000 | 100.000  |

<Chromatogram>

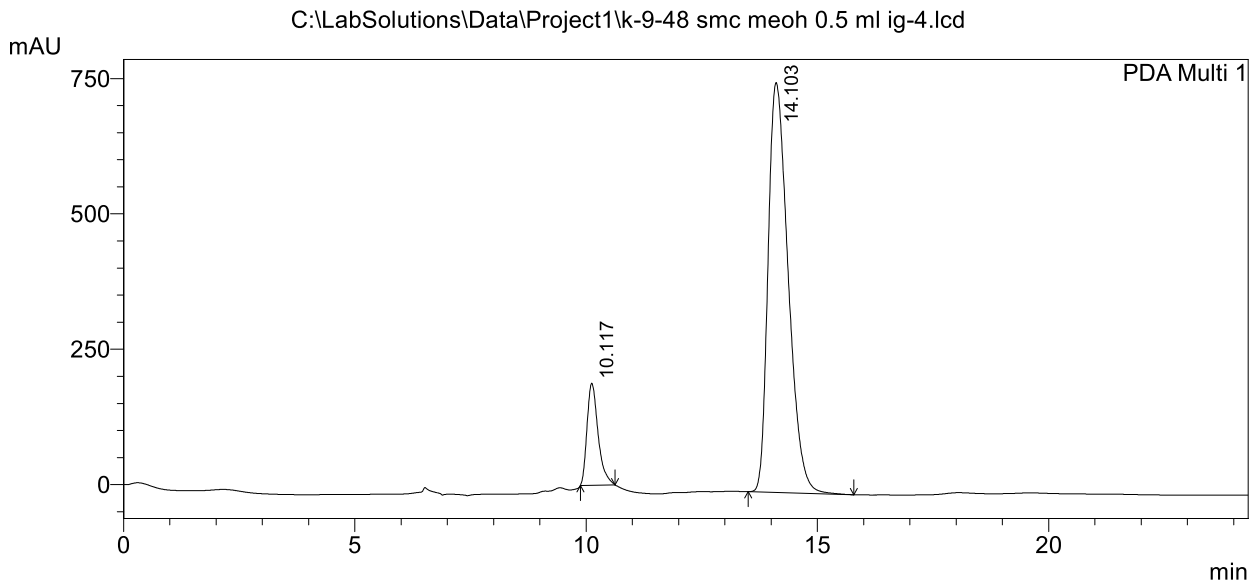

PeakTable

PDA Ch1 254nm 4nm

| Peak# | Ret. Time | Area     | Height | Area %  | Height % |
|-------|-----------|----------|--------|---------|----------|
| 1     | 10.117    | 3138475  | 188434 | 12.089  | 19.932   |
| 2     | 14.103    | 22823996 | 756968 | 87.911  | 80.068   |
| Total |           | 25962471 | 945403 | 100.000 | 100.000  |

<Chromatogram>

C:\LabSolutions\Data\Project1\srs-2-370 product ref.lcd

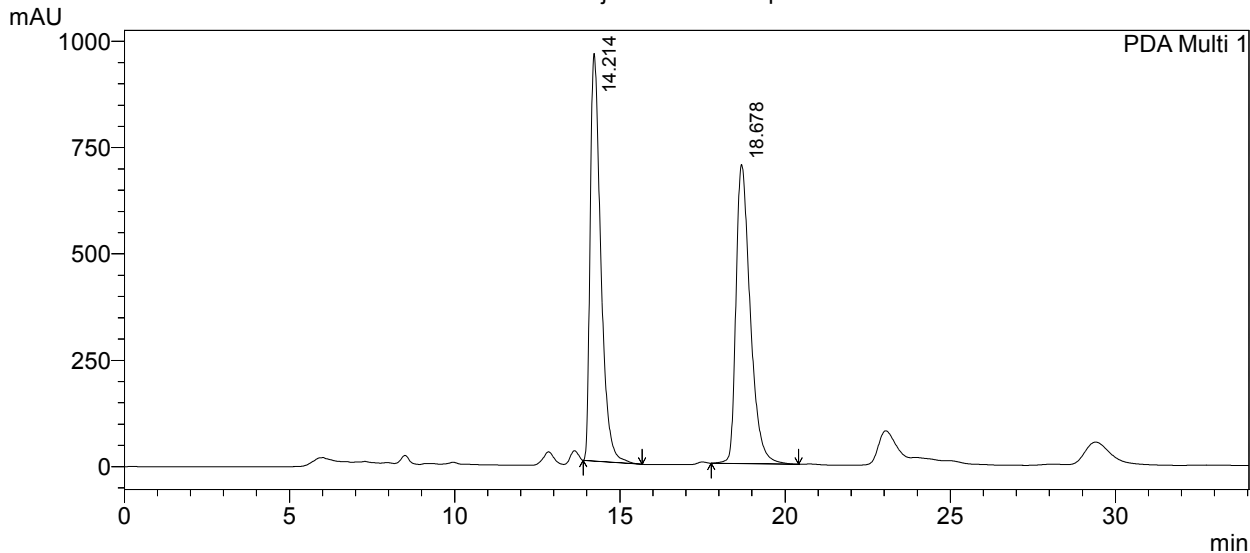

1 PDA Multi 1/254nm 4nm

PeakTable

PDA Ch1 254nm 4nm

| Peak# | Ret. Time | Area     | Height  | Area %  | Height % |
|-------|-----------|----------|---------|---------|----------|
| 1     | 14.214    | 21415569 | 958757  | 50.409  | 57.678   |
| 2     | 18.678    | 21068472 | 703488  | 49.591  | 42.322   |
| Total |           | 42484042 | 1662245 | 100.000 | 100.000  |

C:\LabSolutions\Data\Project1\rs-2-370 prt c final.lcd

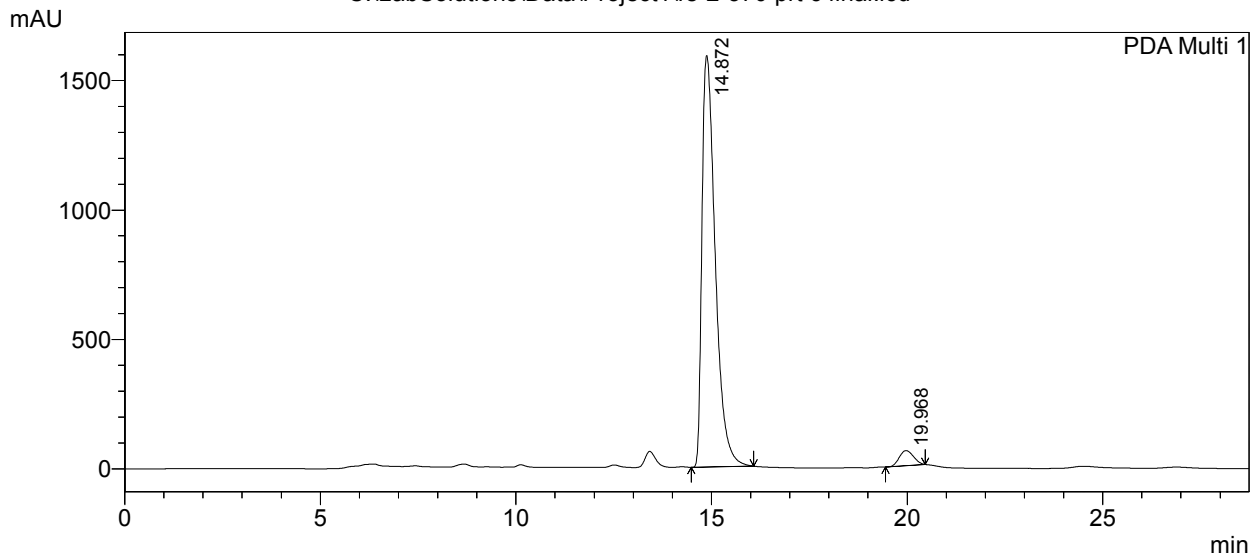

1 PDA Multi 1/254nm 4nm

PeakTable

PDA Ch1 254nm 4nm

| Peak# | Ret. Time | Area     | Height  | Area %  | Height % |
|-------|-----------|----------|---------|---------|----------|
| 1     | 14.872    | 37609708 | 1590075 | 96.236  | 96.449   |
| 2     | 19.968    | 1471174  | 58537   | 3.764   | 3.551    |
| Total |           | 39080882 | 1648612 | 100.000 | 100.000  |

<Chromatogram>

1m-achiral

C:\LabSolutions\Data\Project1\srs-2-thiophene sm ref.lcd

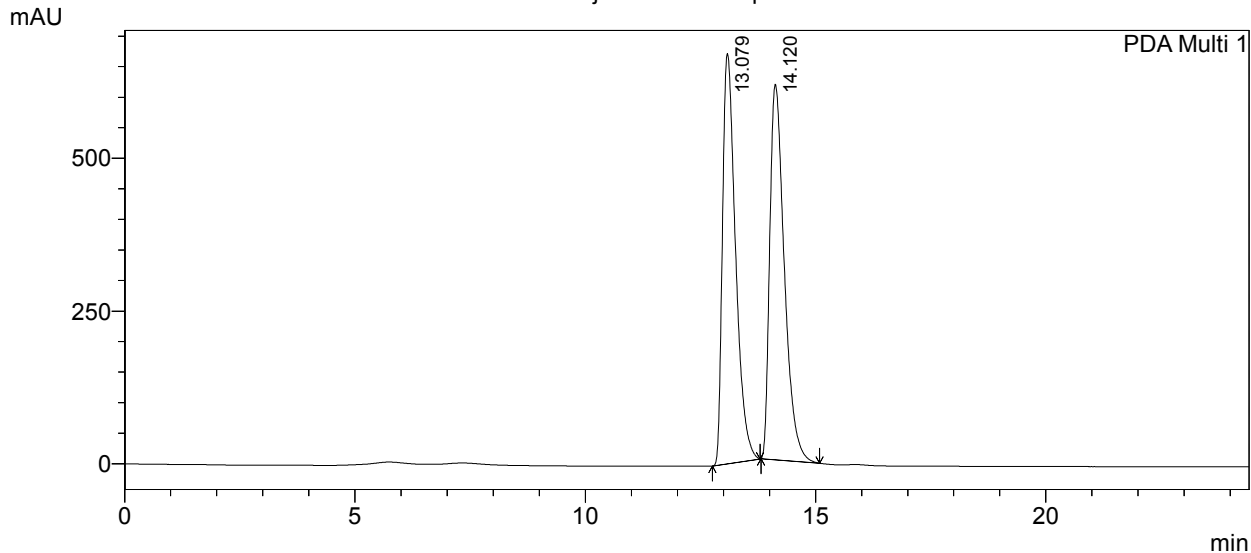

1 PDA Multi 1/254nm 4nm

PeakTable

PDA Ch1 254nm 4nm

| Peak# | Ret. Time | Area     | Height  | Area %  | Height % |
|-------|-----------|----------|---------|---------|----------|
| 1     | 13.079    | 13274657 | 671602  | 49.570  | 52.217   |
| 2     | 14.120    | 13505224 | 614563  | 50.430  | 47.783   |
| Total |           | 26779881 | 1286165 | 100.000 | 100.000  |

Sample Name : srs-2-370 sm chi

1m-chiral

<Chromatogram>

C:\LabSolutions\Data\Project1\srs-2-370 sm chi.lcd

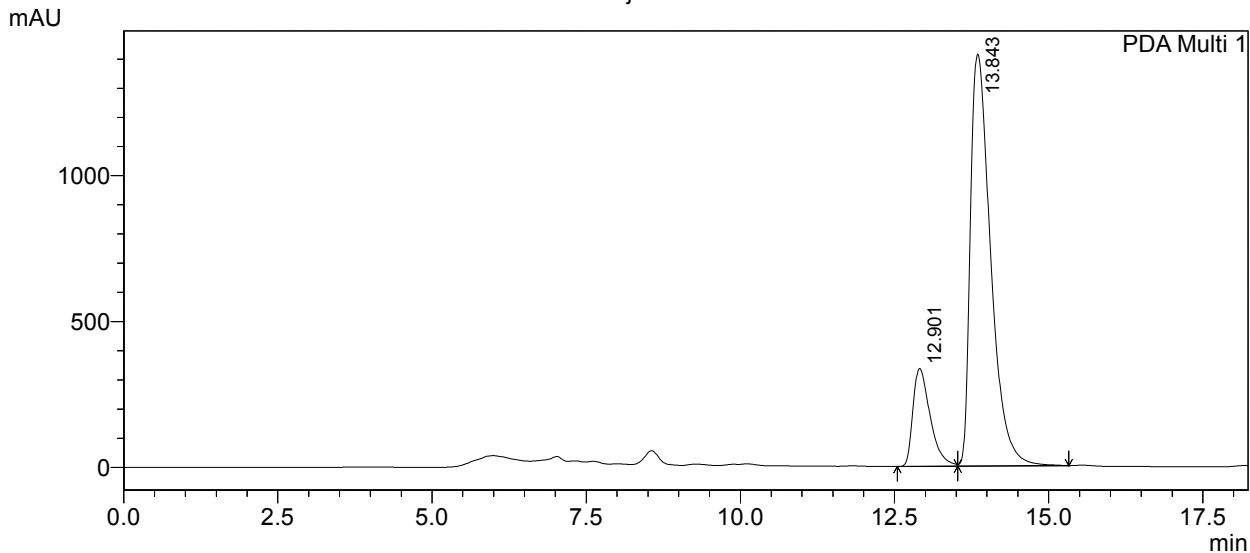

1 PDA Multi 1/254nm 4nm

PeakTable

PDA Ch1 254nm 4nm

| Peak# | Ret. Time | Area     | Height  | Area %  | Height % |
|-------|-----------|----------|---------|---------|----------|
| 1     | 12.901    | 6569885  | 336161  | 16.846  | 19.214   |
| 2     | 13.843    | 32429390 | 1413424 | 83.154  | 80.786   |
| Total |           | 38999276 | 1749585 | 100.000 | 100.000  |

<Chromatogram>

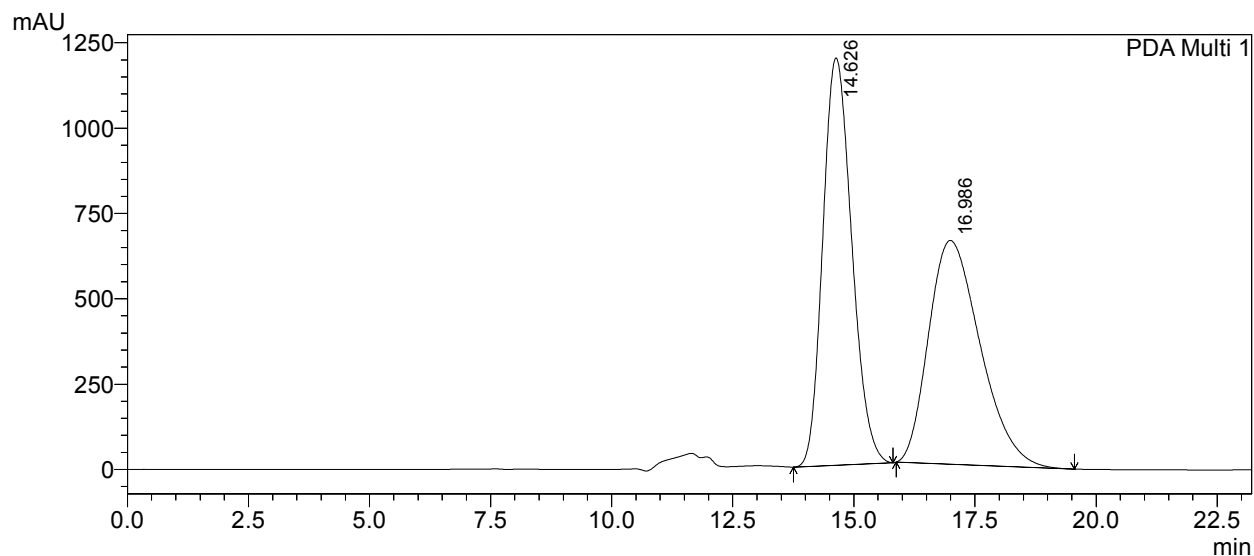

1 PDA Multi 1/254nm 4nm

PeakTable

PDA Ch1 254nm 4nm

| Peak# | Ret. Time | Area     | Height  | Area %  | Height % |
|-------|-----------|----------|---------|---------|----------|
| 1     | 14.626    | 49645651 | 1193604 | 50.530  | 64.535   |
| 2     | 16.986    | 48603974 | 655930  | 49.470  | 35.465   |
| Total |           | 98249625 | 1849534 | 100.000 | 100.000  |

<Chromatogram>

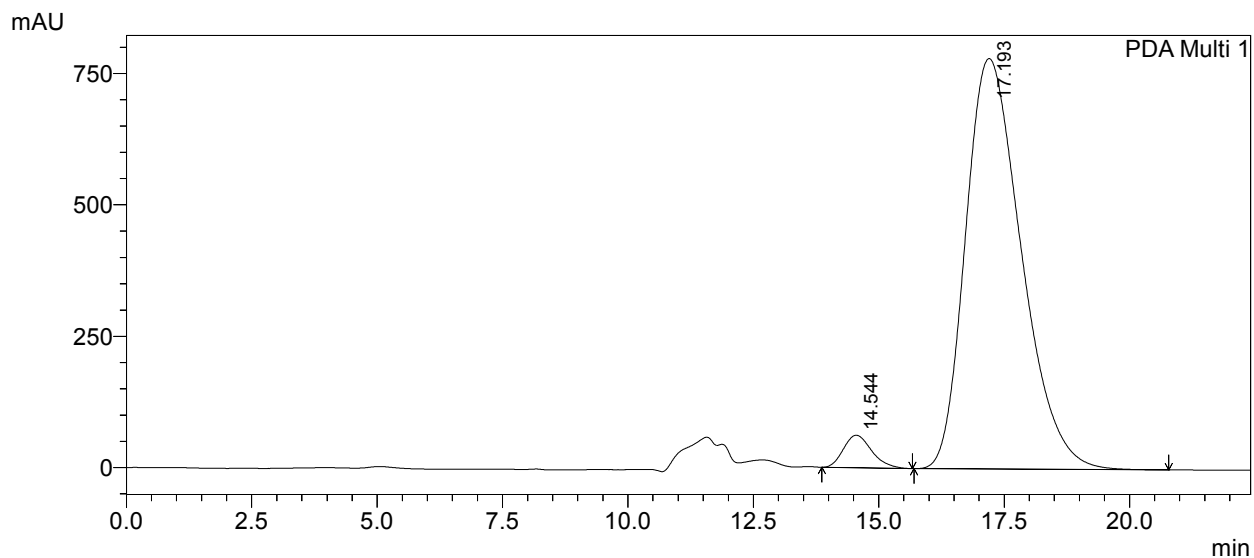

1 PDA Multi 1/254nm 4nm

PeakTable

PDA Ch1 254nm 4nm

| Peak# | Ret. Time | Area     | Height | Area %  | Height % |
|-------|-----------|----------|--------|---------|----------|
| 1     | 14.544    | 2433157  | 61887  | 3.872   | 7.340    |
| 2     | 17.193    | 60402967 | 781272 | 96.128  | 92.660   |
| Total |           | 62836124 | 843158 | 100.000 | 100.000  |

1b

<Chromatogram>

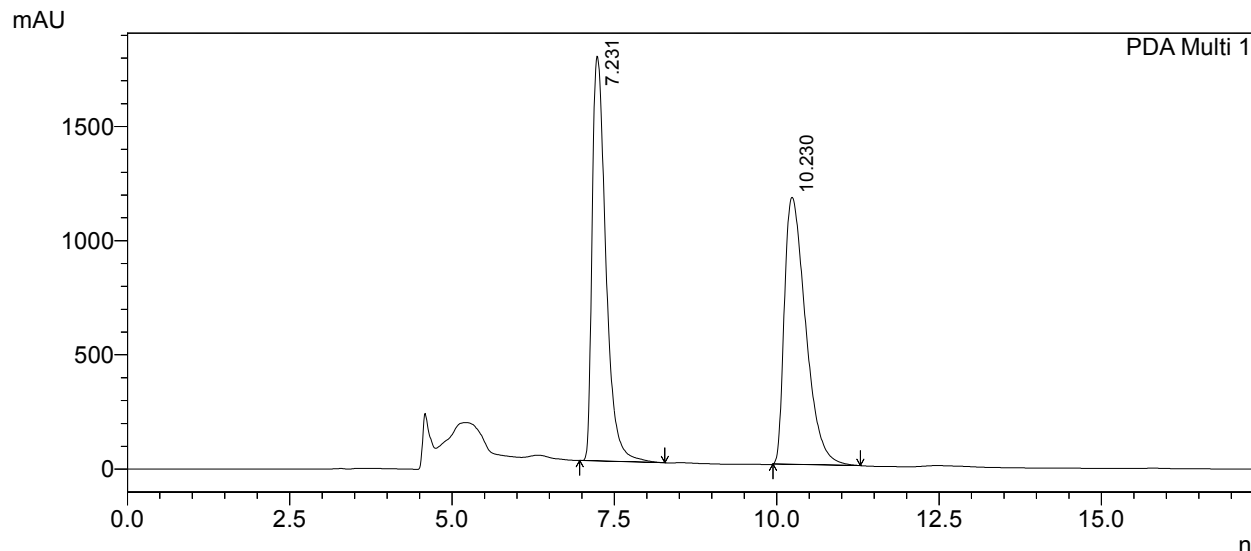

PeakTable

PDA Ch1 254nm 4nm

| Peak# | Ret. Time | Area     | Height  | Area %  | Height % |
|-------|-----------|----------|---------|---------|----------|
| 1     | 7.231     | 26089270 | 1772445 | 49.517  | 60.253   |
| 2     | 10.230    | 26598037 | 1169216 | 50.483  | 39.747   |
| Total |           | 52687308 | 2941662 | 100.000 | 100.000  |

<Chromatogram>

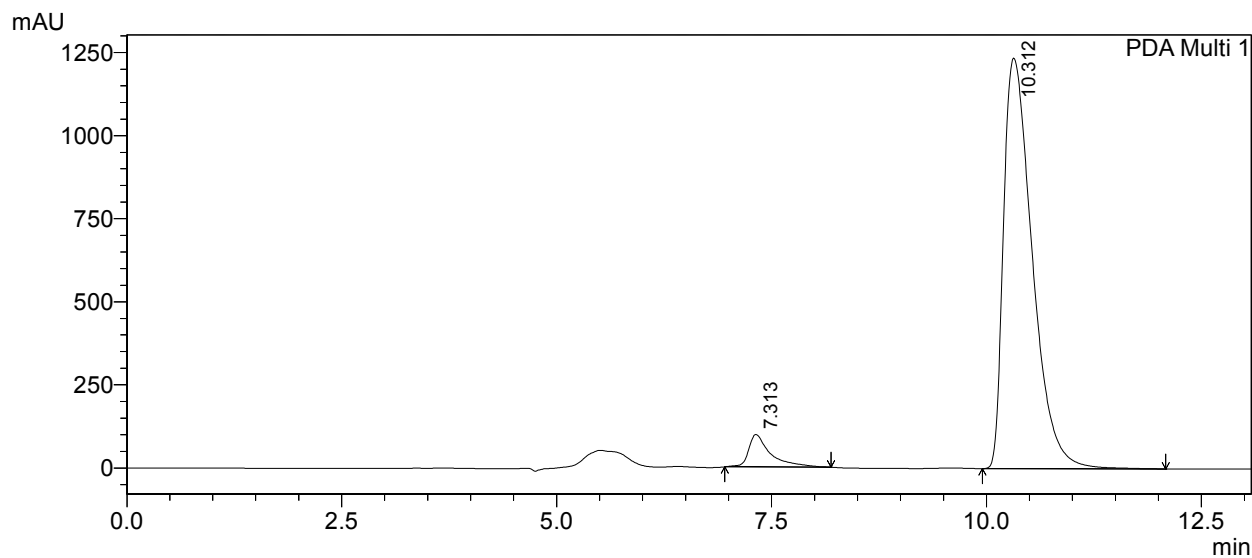

PeakTable

PDA Ch1 254nm 4nm

| Peak# | Ret. Time | Area     | Height  | Area %  | Height % |
|-------|-----------|----------|---------|---------|----------|
| 1     | 7.313     | 1742706  | 97838   | 5.713   | 7.337    |
| 2     | 10.312    | 28763911 | 1235626 | 94.287  | 92.663   |
| Total |           | 30506617 | 1333464 | 100.000 | 100.000  |

<Chromatogram>

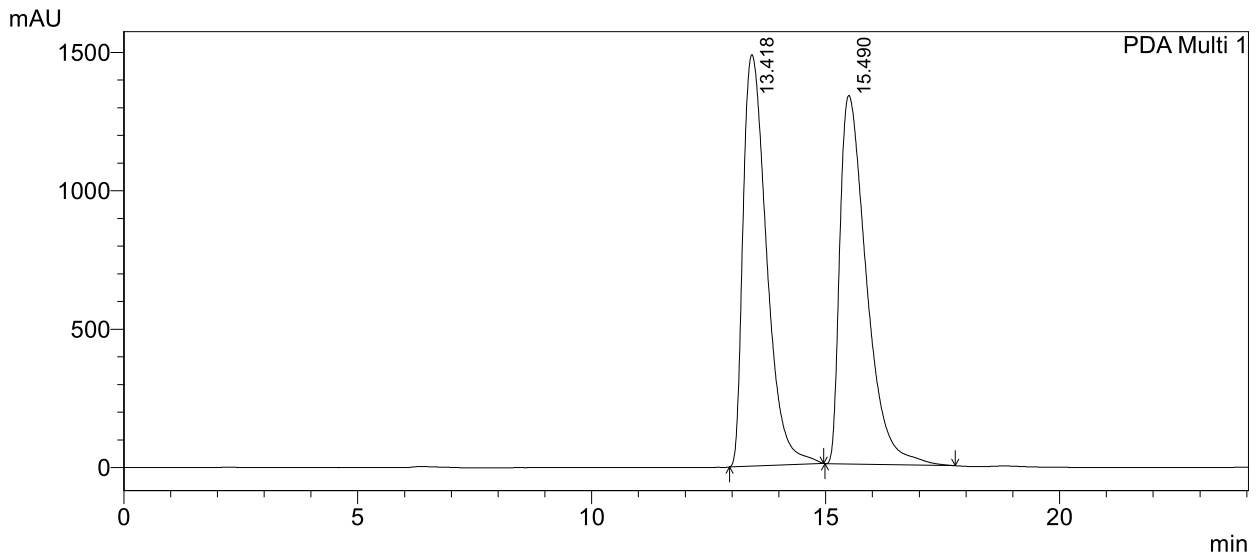

1 PDA Multi 1/254nm 4nm

PeakTable

PDA Ch1 254nm 4nm

| Peak# | Ret. Time | Area      | Height  | Area %  | Height % |
|-------|-----------|-----------|---------|---------|----------|
| 1     | 13.418    | 52008345  | 1486007 | 49.746  | 52.734   |
| 2     | 15.490    | 52540227  | 1331918 | 50.254  | 47.266   |
| Total |           | 104548572 | 2817925 | 100.000 | 100.000  |

<Chromatogram>

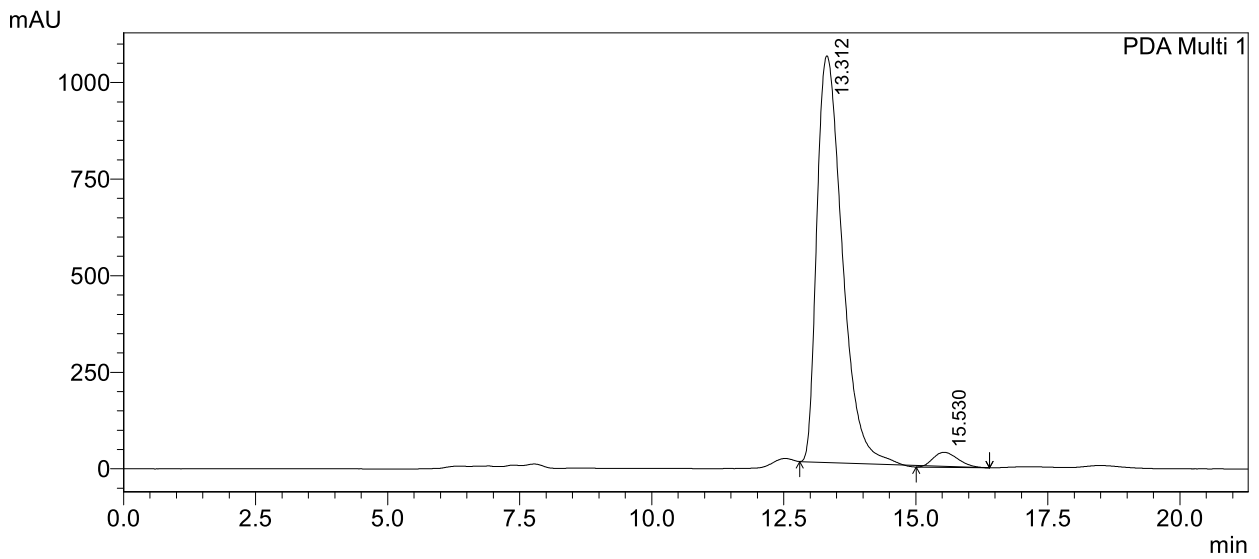

1 PDA Multi 1/254nm 4nm

PeakTable

PDA Ch1 254nm 4nm

| Peak# | Ret. Time | Area     | Height  | Area %  | Height % |
|-------|-----------|----------|---------|---------|----------|
| 1     | 13.312    | 35106062 | 1052275 | 96.449  | 96.431   |
| 2     | 15.530    | 1292648  | 38940   | 3.551   | 3.569    |
| Total |           | 36398710 | 1091216 | 100.000 | 100.000  |



<Chromatogram>

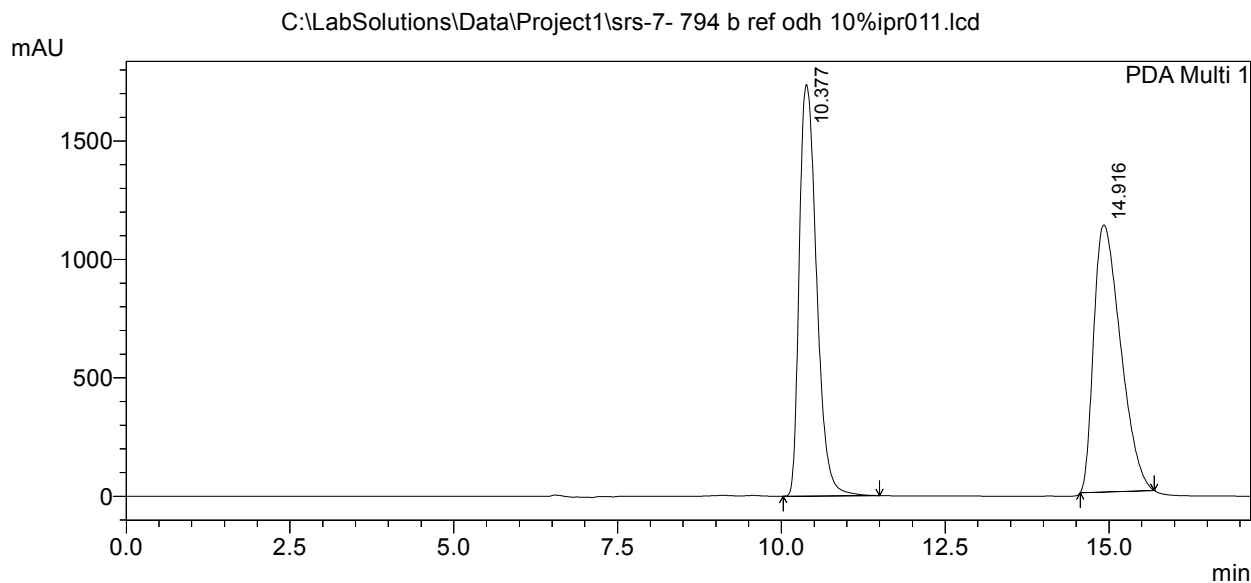

PeakTable

PDA Ch1 254nm 4nm

| Peak# | Ret. Time | Area     | Height  | Area %  | Height % |
|-------|-----------|----------|---------|---------|----------|
| 1     | 10.377    | 31942172 | 1738140 | 49.810  | 60.630   |
| 2     | 14.916    | 32186004 | 1128662 | 50.190  | 39.370   |
| Total |           | 64128176 | 2866802 | 100.000 | 100.000  |

<Chromatogram>

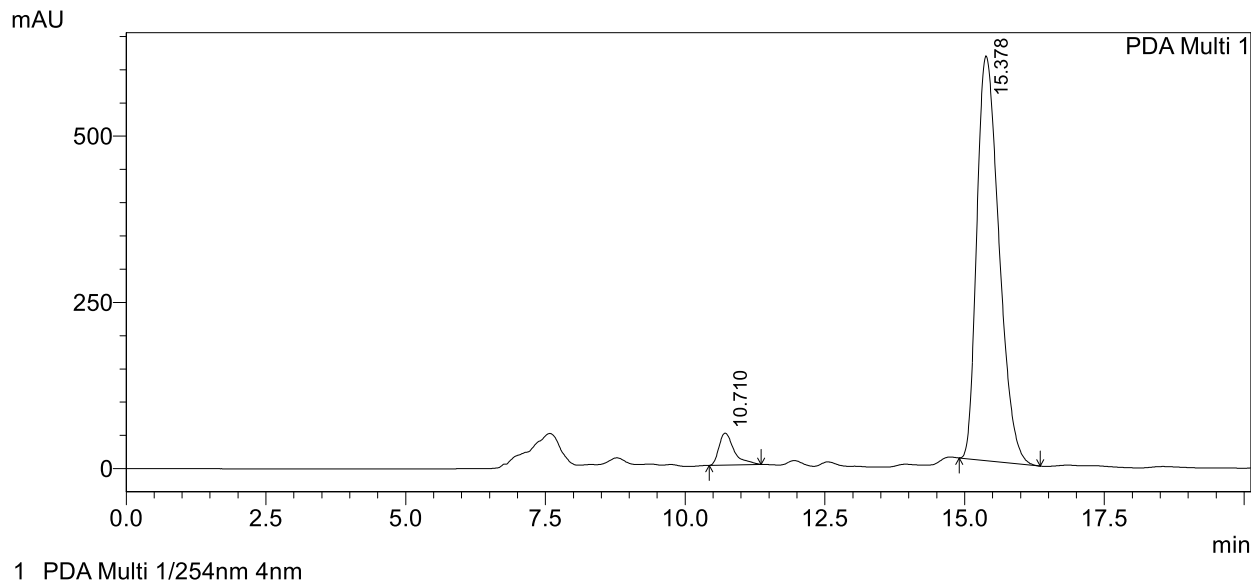

PeakTable

PDA Ch1 254nm 4nm

| Peak# | Ret. Time | Area     | Height | Area %  | Height % |
|-------|-----------|----------|--------|---------|----------|
| 1     | 10.710    | 902526   | 48196  | 5.099   | 7.336    |
| 2     | 15.378    | 16798035 | 608796 | 94.901  | 92.664   |
| Total |           | 17700561 | 656993 | 100.000 | 100.000  |

## &lt;Chromatogram&gt;

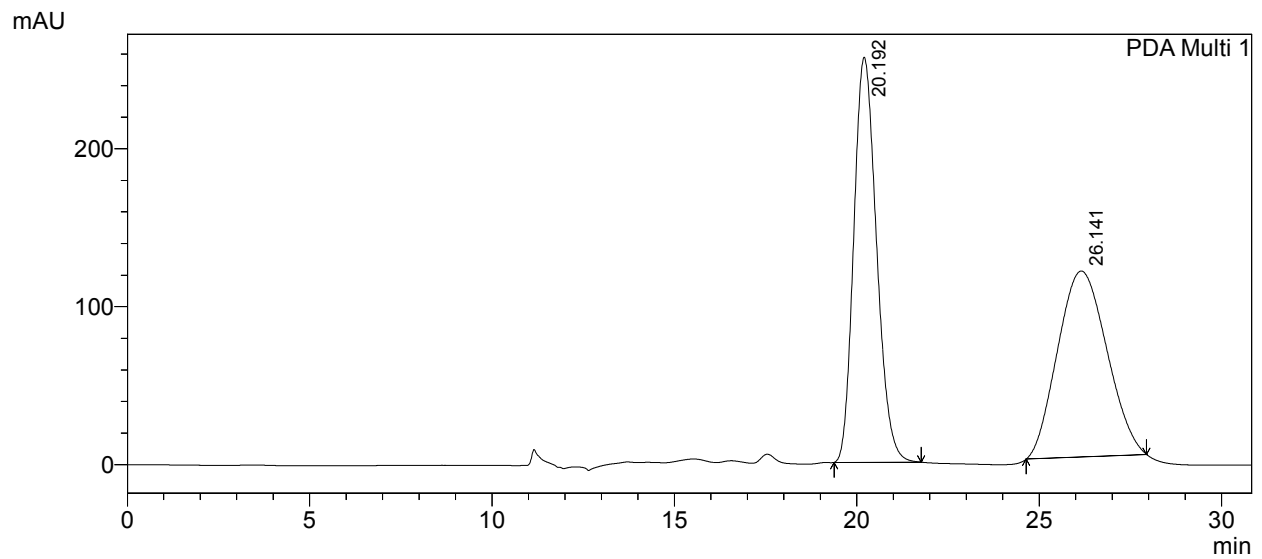

1 PDA Multi 1/254nm 4nm

PeakTable

PDA Ch1 254nm 4nm

| Peak# | Ret. Time | Area     | Height | Area %  | Height % |
|-------|-----------|----------|--------|---------|----------|
| 1     | 20.192    | 11131465 | 256491 | 50.235  | 68.529   |
| 2     | 26.141    | 11027220 | 117787 | 49.765  | 31.471   |
| Total |           | 22158685 | 374279 | 100.000 | 100.000  |

## &lt;Chromatogram&gt;

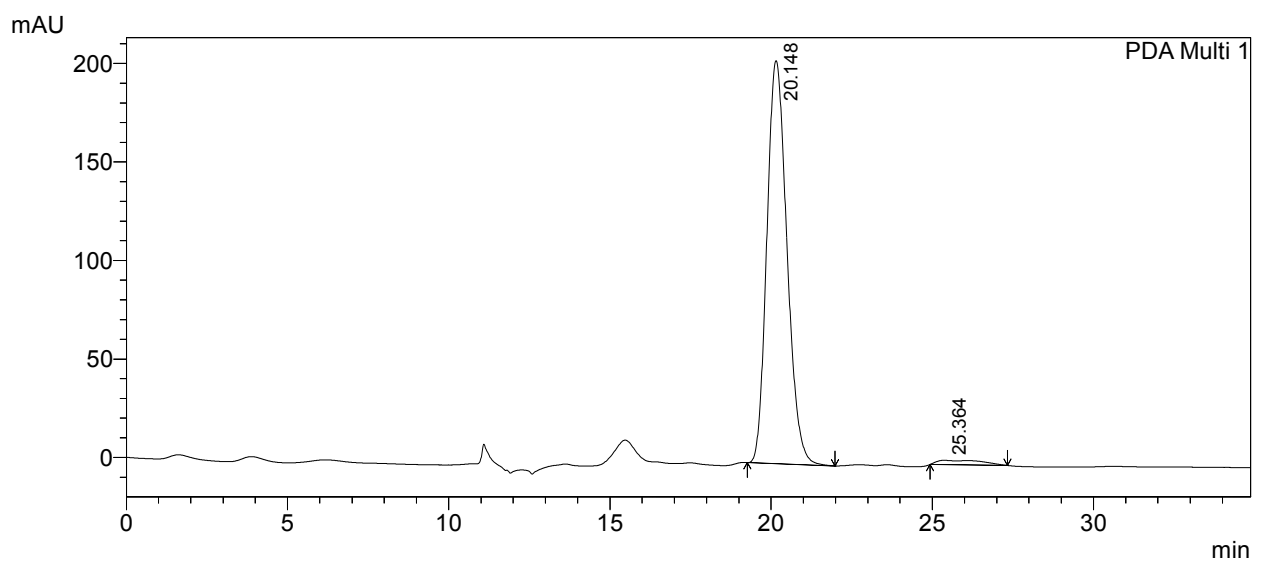

1 PDA Multi 1/254nm 4nm

PeakTable

PDA Ch1 254nm 4nm

| Peak# | Ret. Time | Area    | Height | Area %  | Height % |
|-------|-----------|---------|--------|---------|----------|
| 1     | 20.148    | 8855069 | 204455 | 97.517  | 98.914   |
| 2     | 25.364    | 225464  | 2245   | 2.483   | 1.086    |
| Total |           | 9080533 | 206699 | 100.000 | 100.000  |

Sample Name : rs-2-370 prt c final  
 C:\LabSolutions\Data\Project1\rs-2-370 prt c final.lcd

### <Chromatogram>

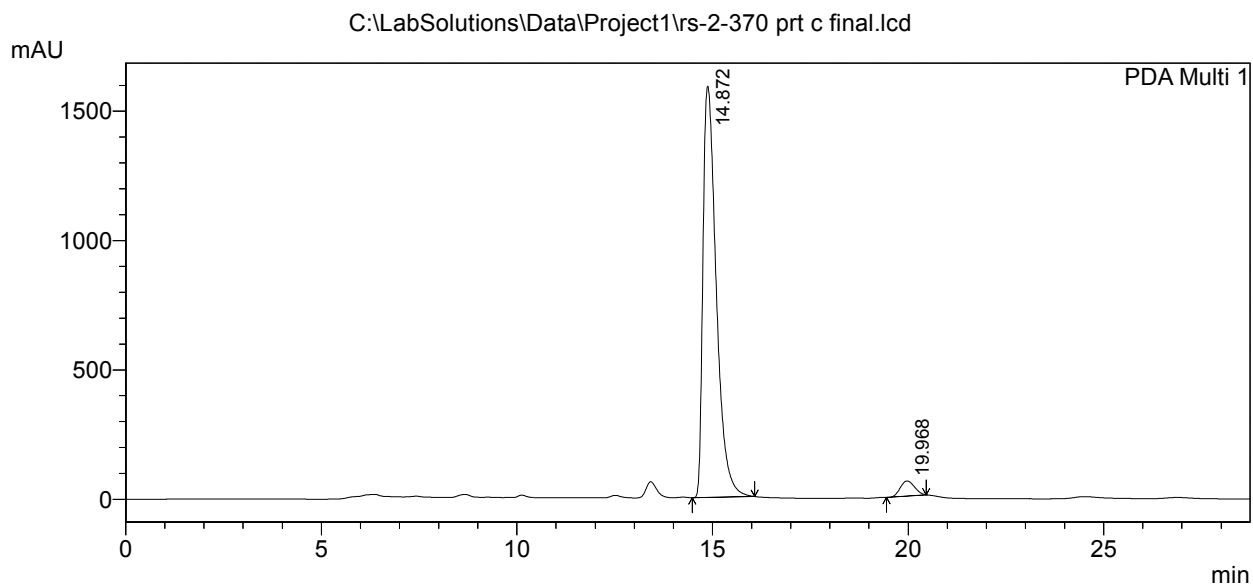

1 PDA Multi 1/254nm 4nm

PeakTable

PDA Ch1 254nm 4nm

| Peak# | Ret. Time | Area     | Height  | Area %  | Height % |
|-------|-----------|----------|---------|---------|----------|
| 1     | 14.872    | 37609708 | 1590075 | 96.236  | 96.449   |
| 2     | 19.968    | 1471174  | 58537   | 3.764   | 3.551    |
| Total |           | 39080882 | 1648612 | 100.000 | 100.000  |

<Chromatogram>

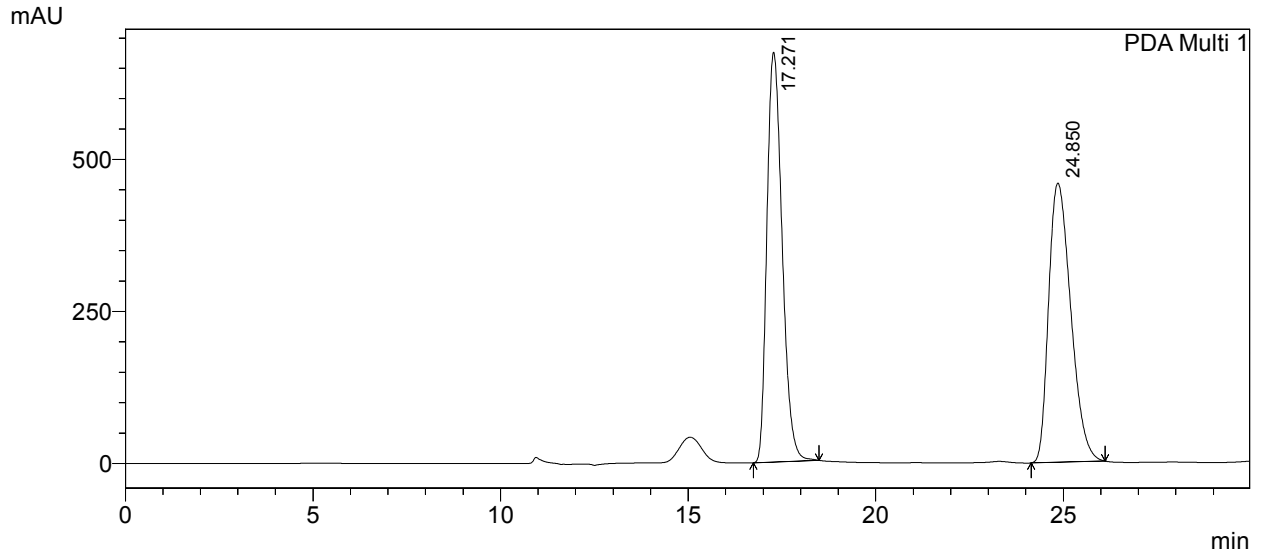

1 PDA Multi 1/254nm 4nm

PeakTable

PDA Ch1 254nm 4nm

| Peak# | Ret. Time | Area     | Height  | Area %  | Height % |
|-------|-----------|----------|---------|---------|----------|
| 1     | 17.271    | 18958640 | 674279  | 50.127  | 59.478   |
| 2     | 24.850    | 18862778 | 459374  | 49.873  | 40.522   |
| Total |           | 37821418 | 1133653 | 100.000 | 100.000  |

<Chromatogram>

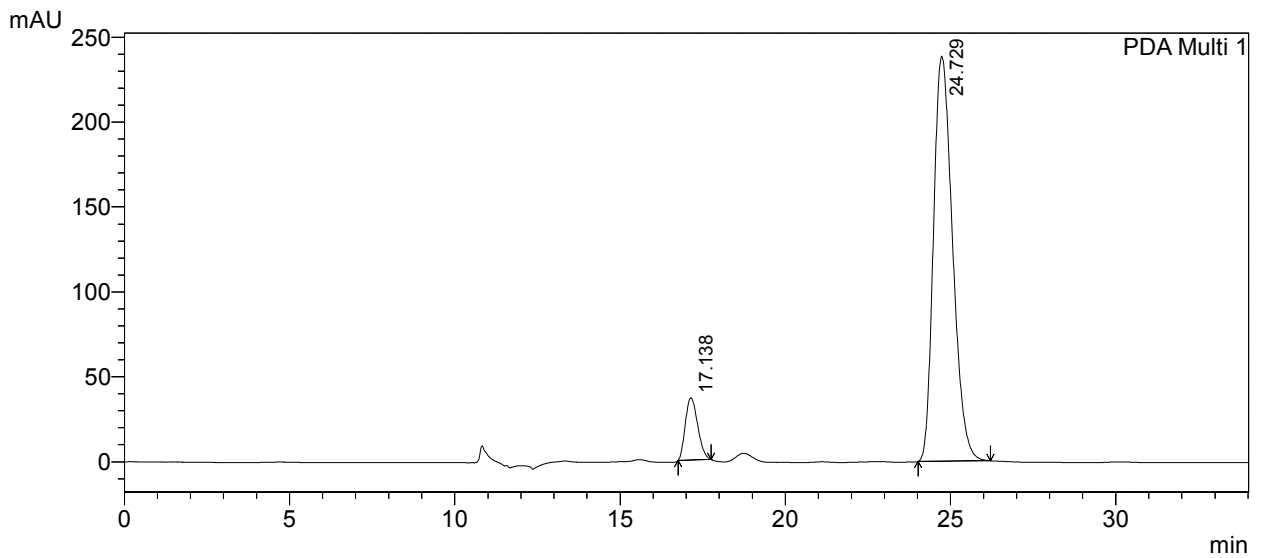

1 PDA Multi 1/254nm 4nm

PeakTable

PDA Ch1 254nm 4nm

| Peak# | Ret. Time | Area     | Height | Area %  | Height % |
|-------|-----------|----------|--------|---------|----------|
| 1     | 17.138    | 954272   | 36682  | 9.086   | 13.334   |
| 2     | 24.729    | 9548608  | 238425 | 90.914  | 86.666   |
| Total |           | 10502880 | 275107 | 100.000 | 100.000  |

<Chromatogram>

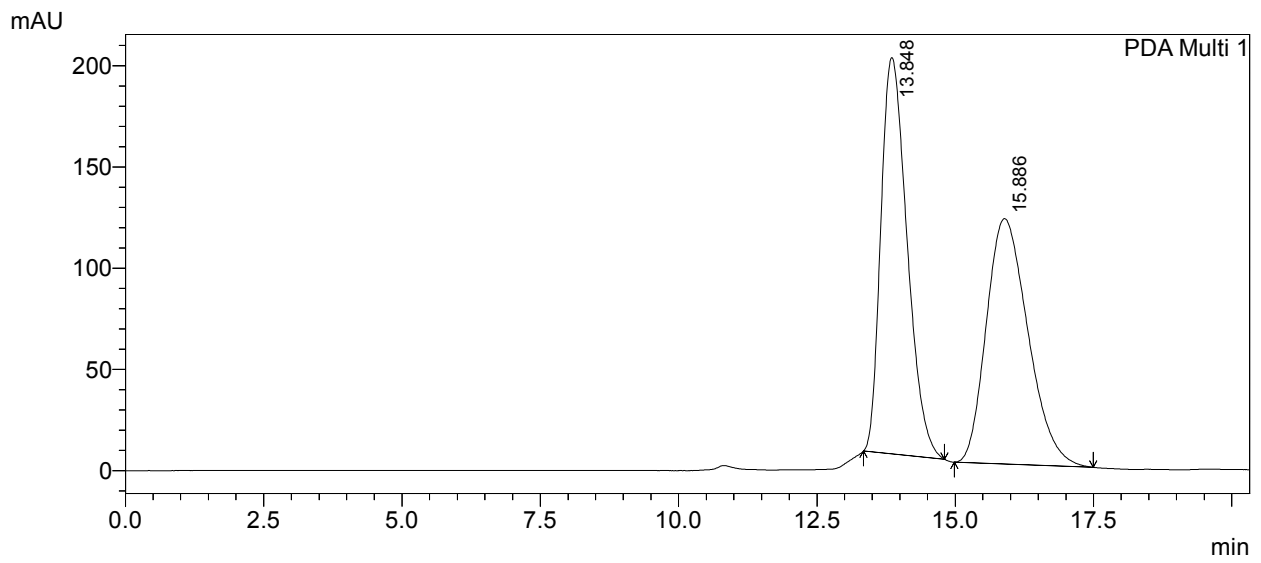

PeakTable

PDA Ch1 254nm 4nm

| Peak# | Ret. Time | Area     | Height | Area %  | Height % |
|-------|-----------|----------|--------|---------|----------|
| 1     | 13.848    | 6459542  | 195687 | 50.444  | 61.750   |
| 2     | 15.886    | 6345730  | 121216 | 49.556  | 38.250   |
| Total |           | 12805273 | 316903 | 100.000 | 100.000  |

<Chromatogram>

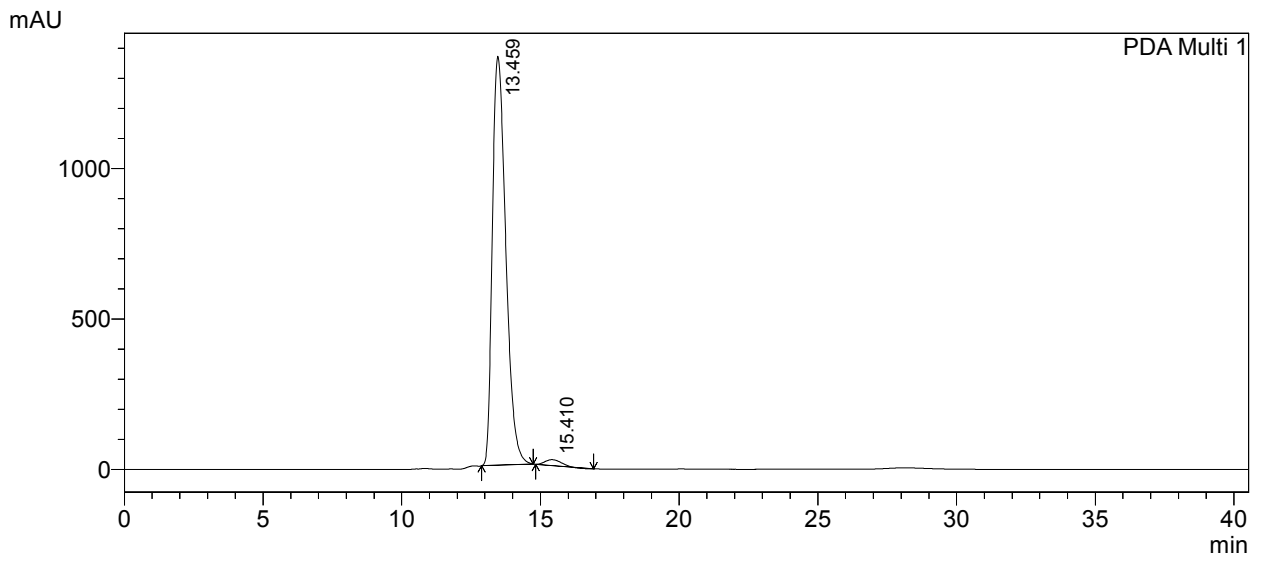

PeakTable

PDA Ch1 254nm 4nm

| Peak# | Ret. Time | Area     | Height  | Area %  | Height % |
|-------|-----------|----------|---------|---------|----------|
| 1     | 13.459    | 45762050 | 1358767 | 98.394  | 98.580   |
| 2     | 15.410    | 746867   | 19568   | 1.606   | 1.420    |
| Total |           | 46508917 | 1378335 | 100.000 | 100.000  |

<Chromatogram>

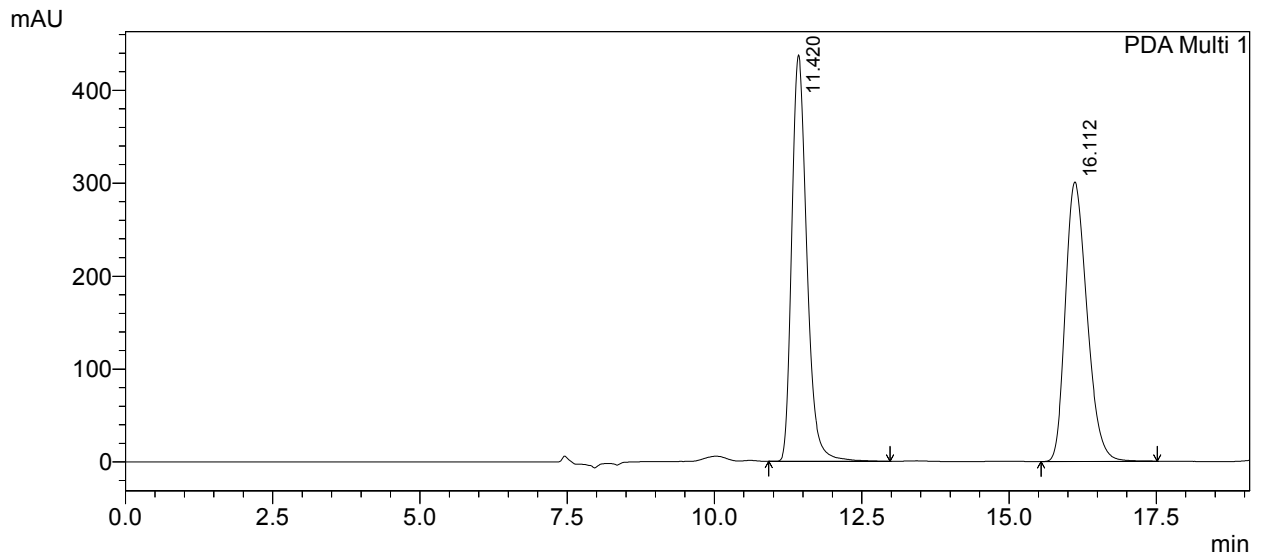

PeakTable

PDA Ch1 254nm 4nm

| Peak# | Ret. Time | Area     | Height | Area %  | Height % |
|-------|-----------|----------|--------|---------|----------|
| 1     | 11.420    | 7798366  | 437529 | 50.358  | 59.253   |
| 2     | 16.112    | 7687439  | 300879 | 49.642  | 40.747   |
| Total |           | 15485805 | 738408 | 100.000 | 100.000  |

<Chromatogram>

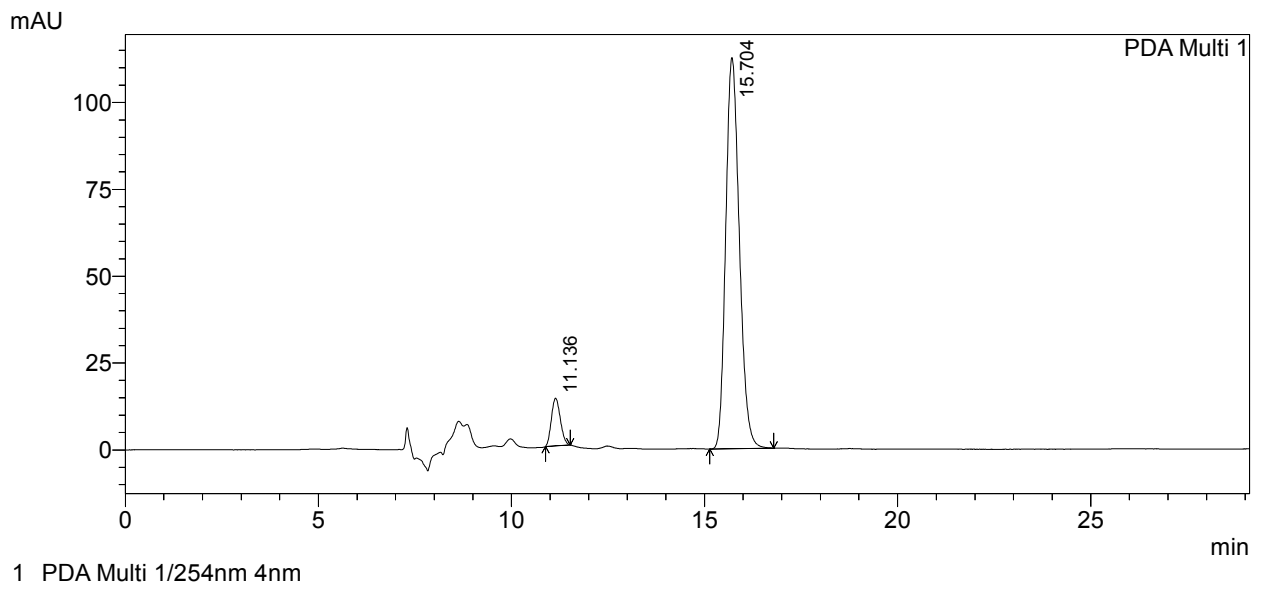

PeakTable

PDA Ch1 254nm 4nm

| Peak# | Ret. Time | Area    | Height | Area %  | Height % |
|-------|-----------|---------|--------|---------|----------|
| 1     | 11.136    | 220820  | 13672  | 7.406   | 10.831   |
| 2     | 15.704    | 2760768 | 112555 | 92.594  | 89.169   |
| Total |           | 2981588 | 126227 | 100.000 | 100.000  |

<Chromatogram>

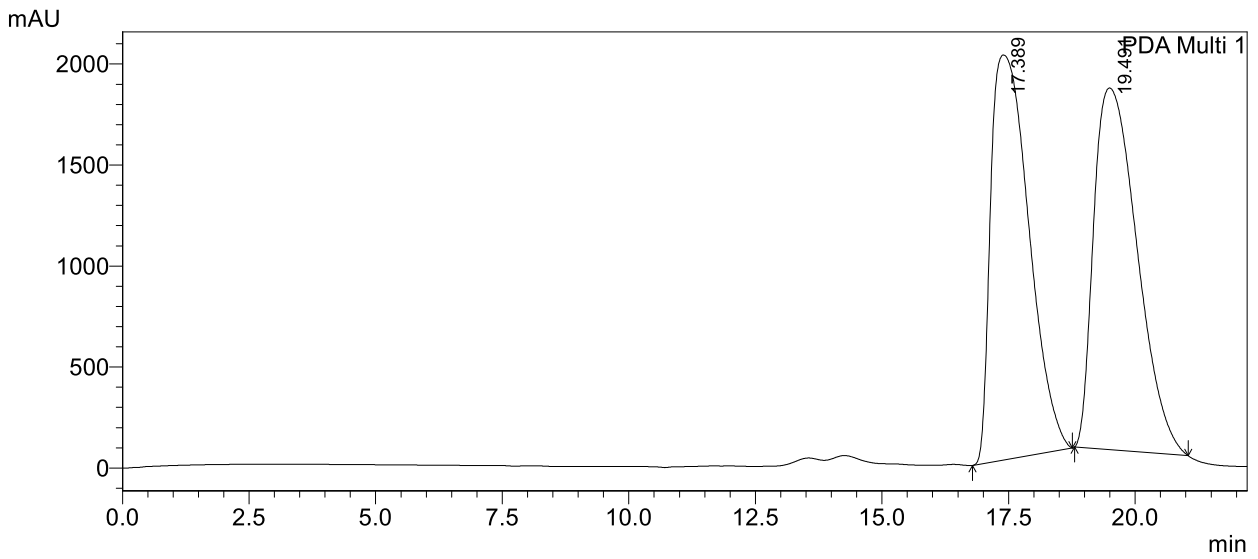

1 PDA Multi 1/254nm 4nm

PeakTable

PDA Ch1 254nm 4nm

| Peak# | Ret. Time | Area      | Height  | Area %  | Height % |
|-------|-----------|-----------|---------|---------|----------|
| 1     | 17.389    | 105162585 | 2005464 | 49.608  | 52.825   |
| 2     | 19.491    | 106823489 | 1790977 | 50.392  | 47.175   |
| Total |           | 211986074 | 3796441 | 100.000 | 100.000  |

<Chromatogram>

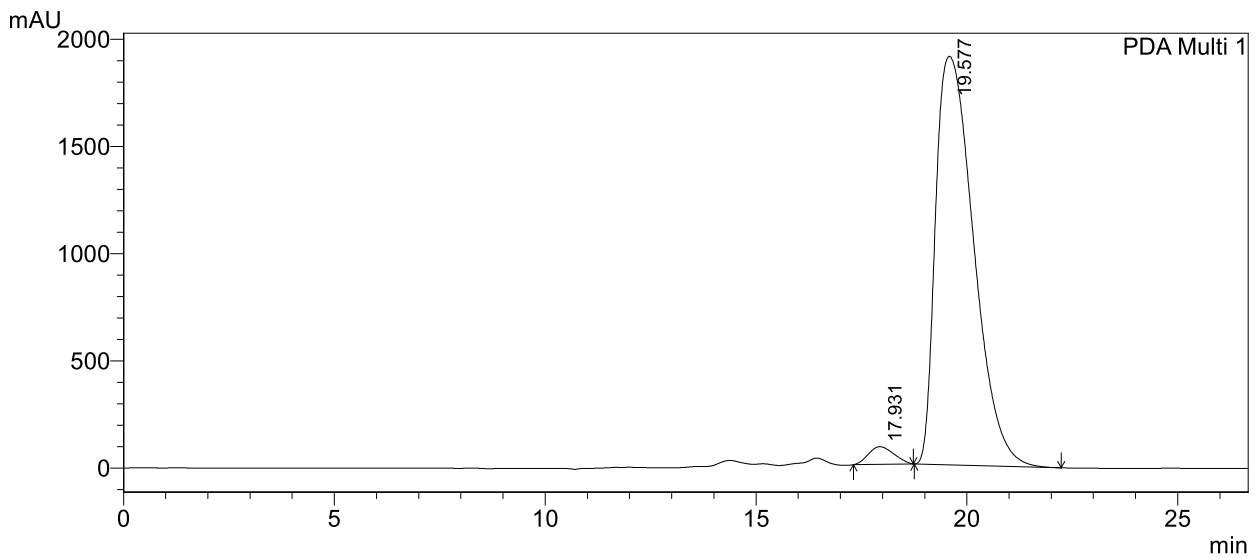

1 PDA Multi 1/254nm 4nm

PeakTable

PDA Ch1 254nm 4nm

| Peak# | Ret. Time | Area      | Height  | Area %  | Height % |
|-------|-----------|-----------|---------|---------|----------|
| 1     | 17.931    | 3446148   | 82357   | 2.797   | 4.140    |
| 2     | 19.577    | 119741785 | 1906799 | 97.203  | 95.860   |
| Total |           | 123187933 | 1989156 | 100.000 | 100.000  |

1b

<Chromatogram>

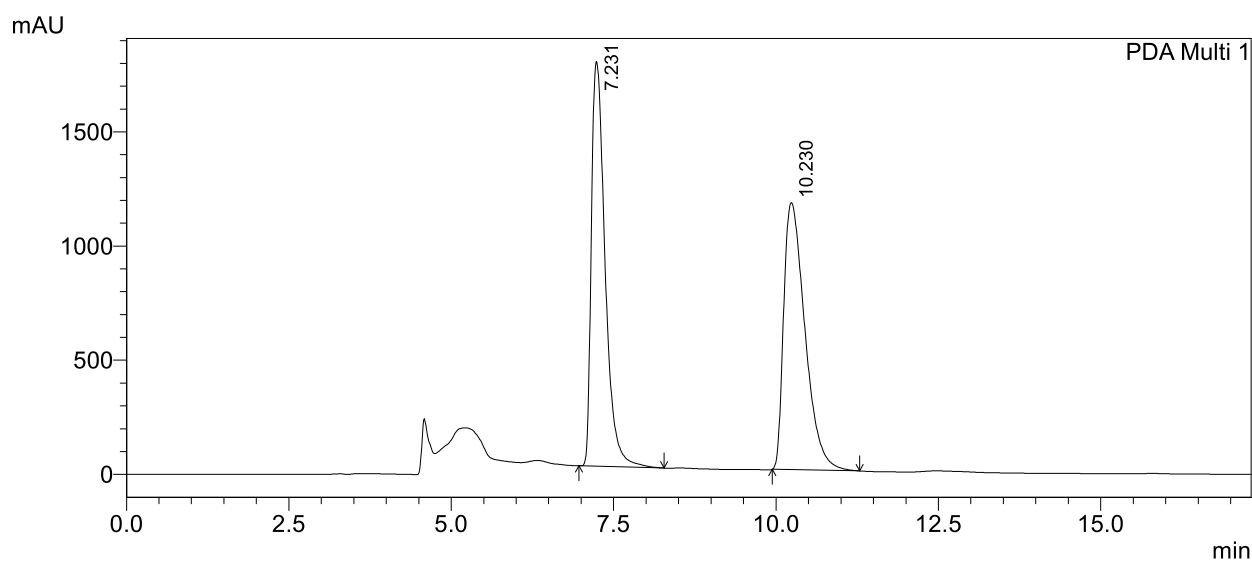

1 PDA Multi 1/254nm 4nm

PeakTable

PDA Ch1 254nm 4nm

| Peak# | Ret. Time | Area     | Height  | Area %  | Height % |
|-------|-----------|----------|---------|---------|----------|
| 1     | 7.231     | 26089270 | 1772445 | 49.517  | 60.253   |
| 2     | 10.230    | 26598037 | 1169216 | 50.483  | 39.747   |
| Total |           | 52687308 | 2941662 | 100.000 | 100.000  |

<Chromatogram>

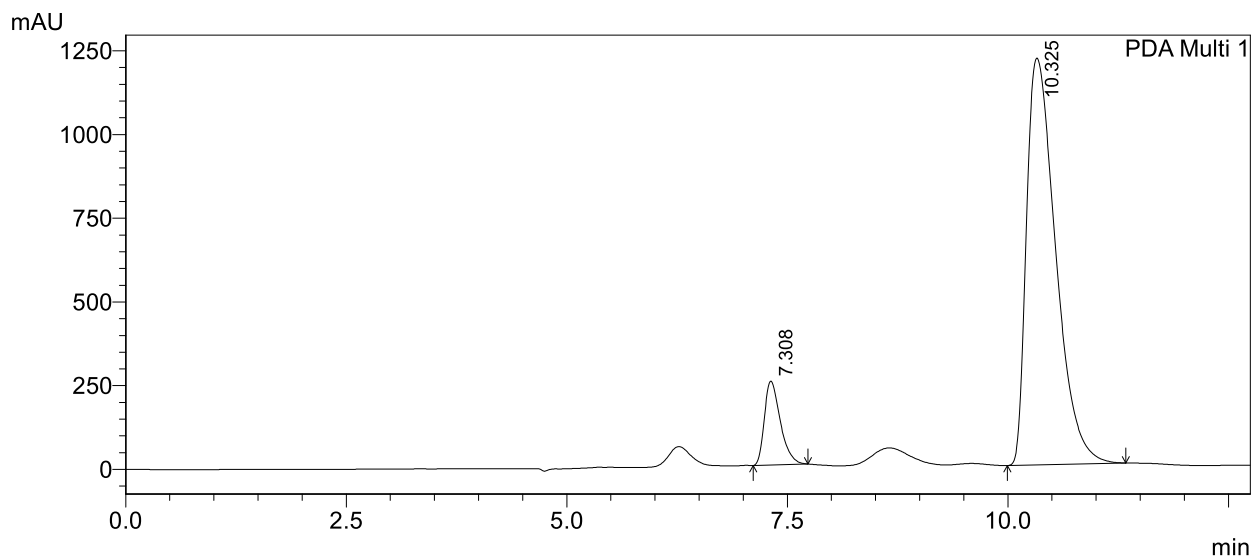

1 PDA Multi 1/254nm 4nm

PeakTable

PDA Ch1 254nm 4nm

| Peak# | Ret. Time | Area     | Height  | Area %  | Height % |
|-------|-----------|----------|---------|---------|----------|
| 1     | 7.308     | 3145344  | 250549  | 10.112  | 17.103   |
| 2     | 10.325    | 27958366 | 1214421 | 89.888  | 82.897   |
| Total |           | 31103710 | 1464970 | 100.000 | 100.000  |



## &lt;Chromatogram&gt;

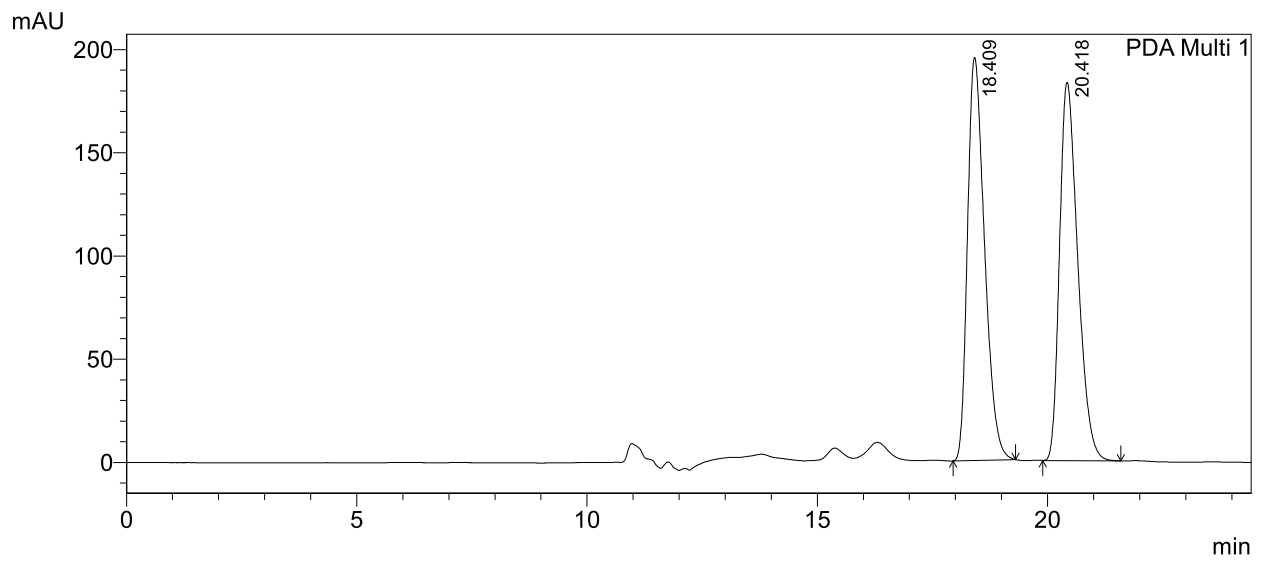

1 PDA Multi 1/254nm 4nm

PeakTable

PDA Ch1 254nm 4nm

| Peak# | Ret. Time | Area     | Height | Area %  | Height % |
|-------|-----------|----------|--------|---------|----------|
| 1     | 18.409    | 5013677  | 195249 | 49.904  | 51.579   |
| 2     | 20.418    | 5033050  | 183297 | 50.096  | 48.421   |
| Total |           | 10046727 | 378546 | 100.000 | 100.000  |

## &lt;Chromatogram&gt;

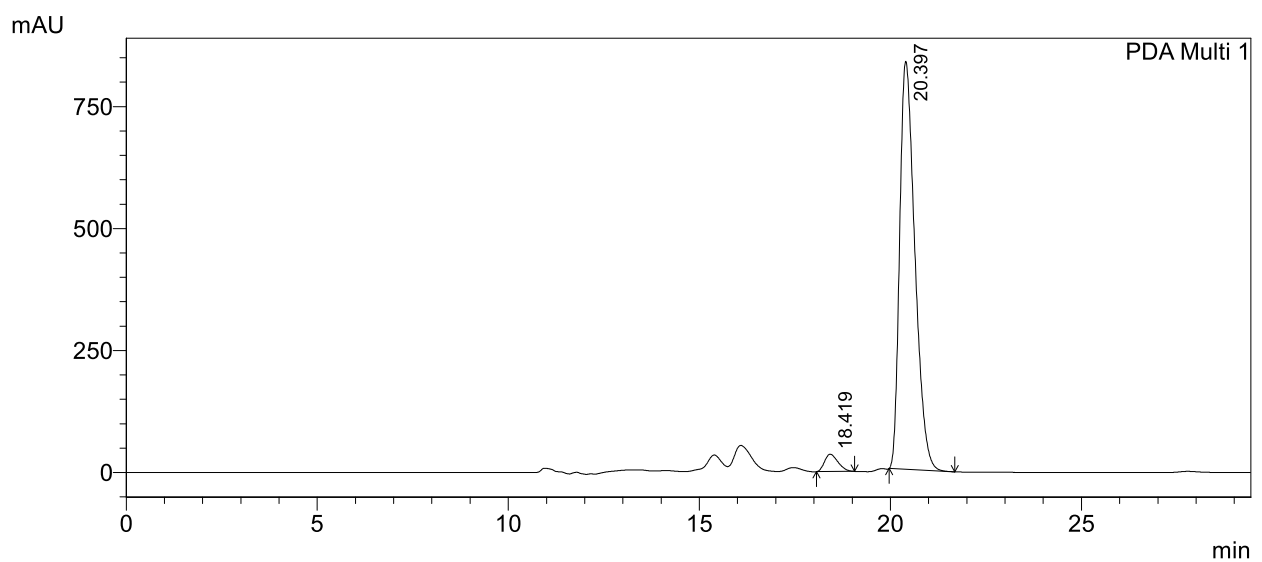

1 PDA Multi 1/254nm 4nm

PeakTable

PDA Ch1 254nm 4nm

| Peak# | Ret. Time | Area     | Height | Area %  | Height % |
|-------|-----------|----------|--------|---------|----------|
| 1     | 18.419    | 870514   | 35639  | 3.627   | 4.088    |
| 2     | 20.397    | 23129703 | 836137 | 96.373  | 95.912   |
| Total |           | 24000218 | 871776 | 100.000 | 100.000  |

<Chromatogram>

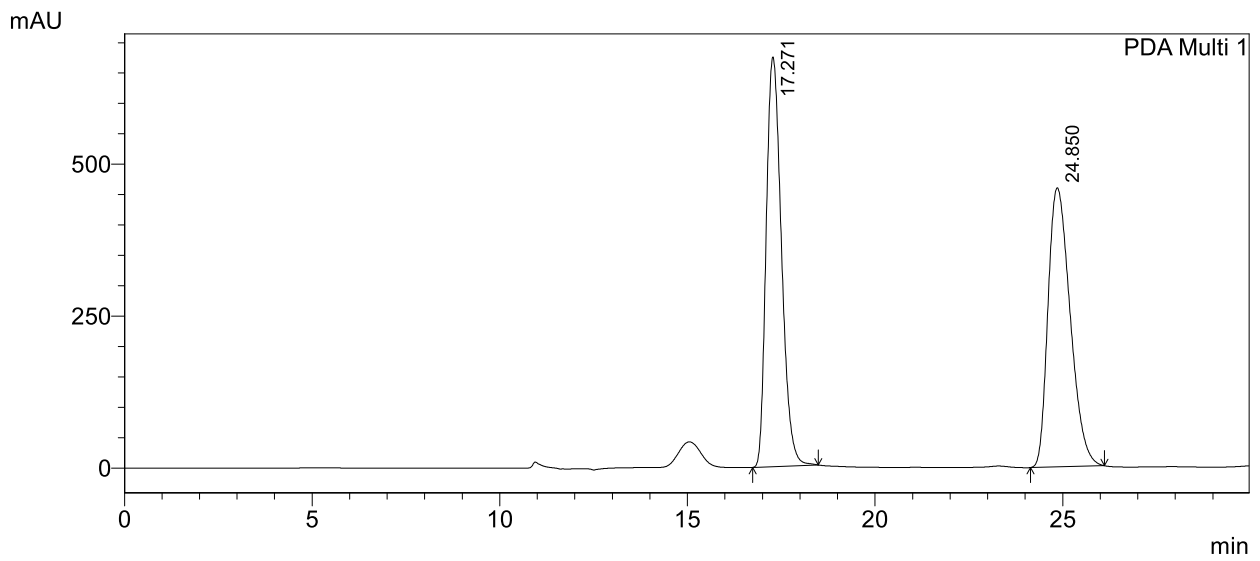

1 PDA Multi 1/254nm 4nm

PeakTable

PDA Ch1 254nm 4nm

| Peak# | Ret. Time | Area     | Height  | Area %  | Height % |
|-------|-----------|----------|---------|---------|----------|
| 1     | 17.271    | 18958640 | 674279  | 50.127  | 59.478   |
| 2     | 24.850    | 18862778 | 459374  | 49.873  | 40.522   |
| Total |           | 37821418 | 1133653 | 100.000 | 100.000  |

<Chromatogram>

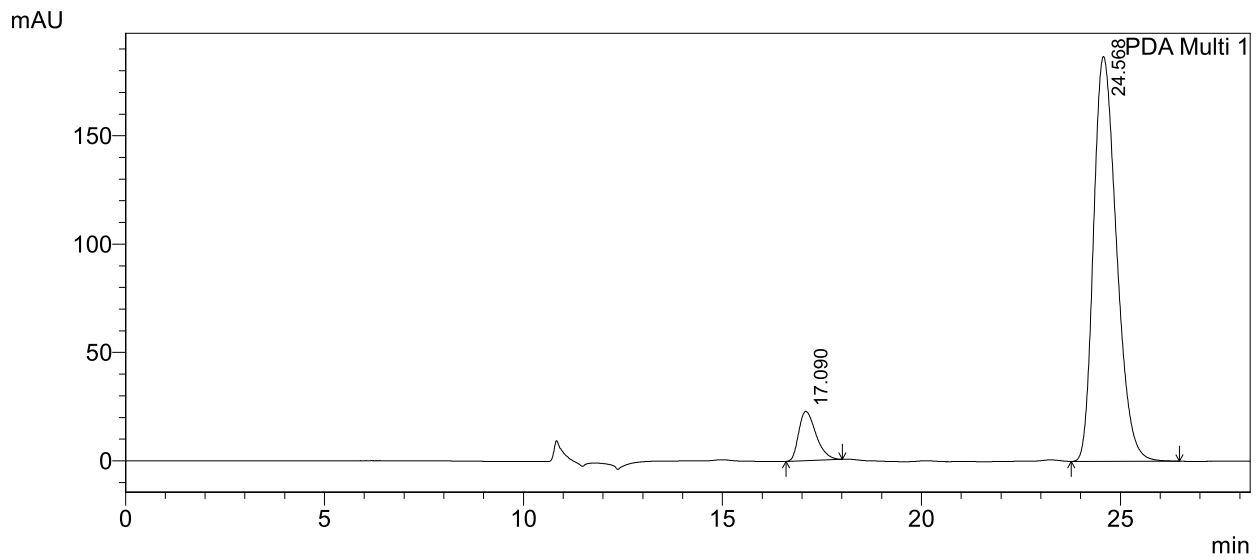

1 PDA Multi 1/254nm 4nm

PeakTable

PDA Ch1 254nm 4nm

| Peak# | Ret. Time | Area    | Height | Area %  | Height % |
|-------|-----------|---------|--------|---------|----------|
| 1     | 17.090    | 686679  | 22760  | 8.408   | 10.858   |
| 2     | 24.568    | 7479913 | 186858 | 91.592  | 89.142   |
| Total |           | 8166592 | 209618 | 100.000 | 100.000  |

<Chromatogram>

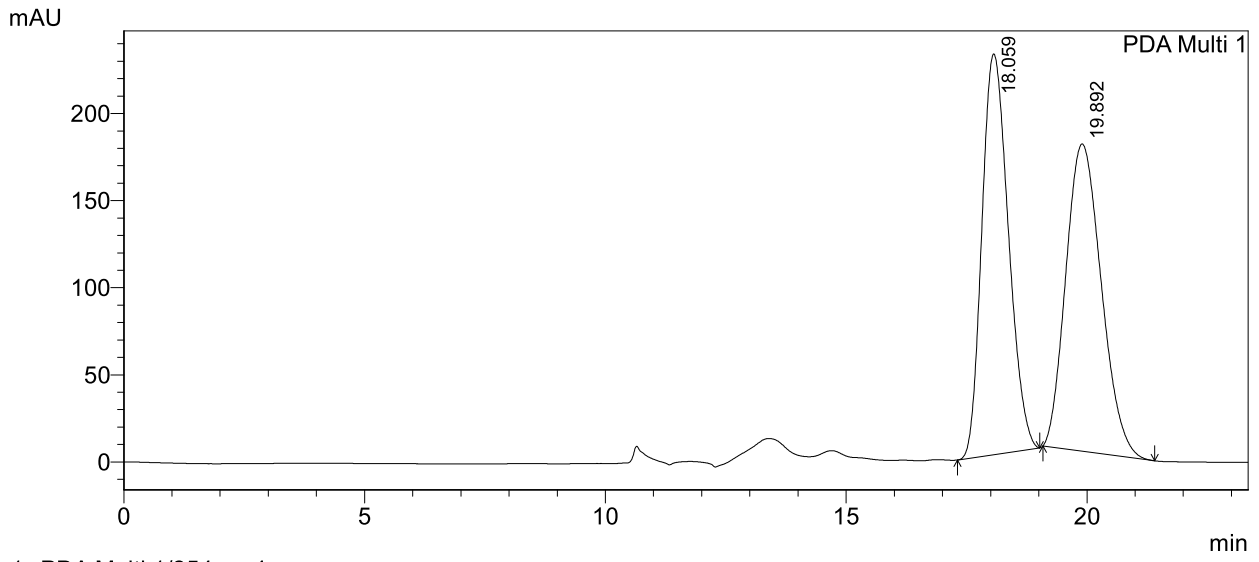

1 PDA Multi 1/254nm 4nm

PeakTable

PDA Ch1 254nm 4nm

| Peak# | Ret. Time | Area     | Height | Area %  | Height % |
|-------|-----------|----------|--------|---------|----------|
| 1     | 18.059    | 8814243  | 230016 | 49.417  | 56.600   |
| 2     | 19.892    | 9022313  | 176371 | 50.583  | 43.400   |
| Total |           | 17836556 | 406387 | 100.000 | 100.000  |

<Chromatogram>

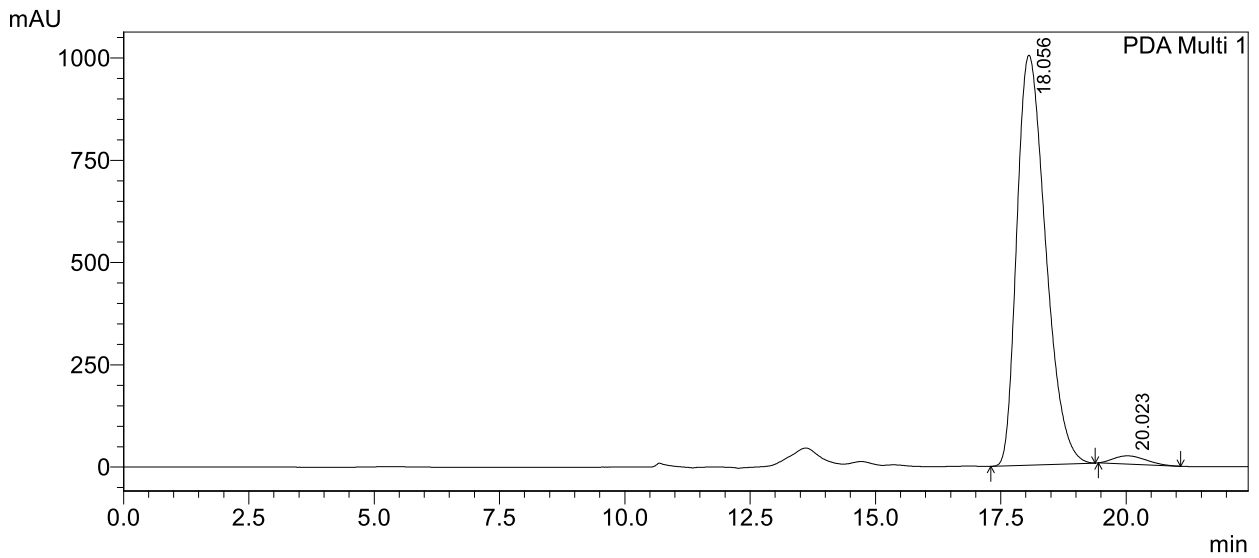

1 PDA Multi 1/254nm 4nm

PeakTable

PDA Ch1 254nm 4nm

| Peak# | Ret. Time | Area     | Height  | Area %  | Height % |
|-------|-----------|----------|---------|---------|----------|
| 1     | 18.056    | 39949816 | 1002137 | 97.776  | 98.037   |
| 2     | 20.023    | 908766   | 20066   | 2.224   | 1.963    |
| Total |           | 40858582 | 1022204 | 100.000 | 100.000  |

<Chromatogram>

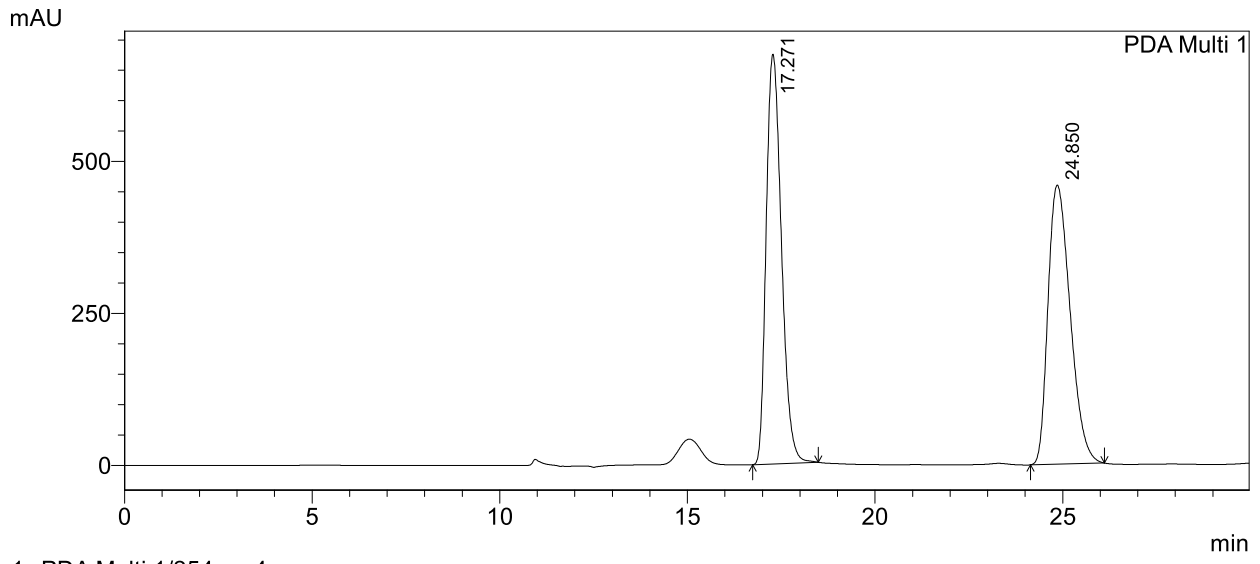

1 PDA Multi 1/254nm 4nm

PeakTable

PDA Ch1 254nm 4nm

| Peak# | Ret. Time | Area     | Height  | Area %  | Height % |
|-------|-----------|----------|---------|---------|----------|
| 1     | 17.271    | 18958640 | 674279  | 50.127  | 59.478   |
| 2     | 24.850    | 18862778 | 459374  | 49.873  | 40.522   |
| Total |           | 37821418 | 1133653 | 100.000 | 100.000  |

<Chromatogram>

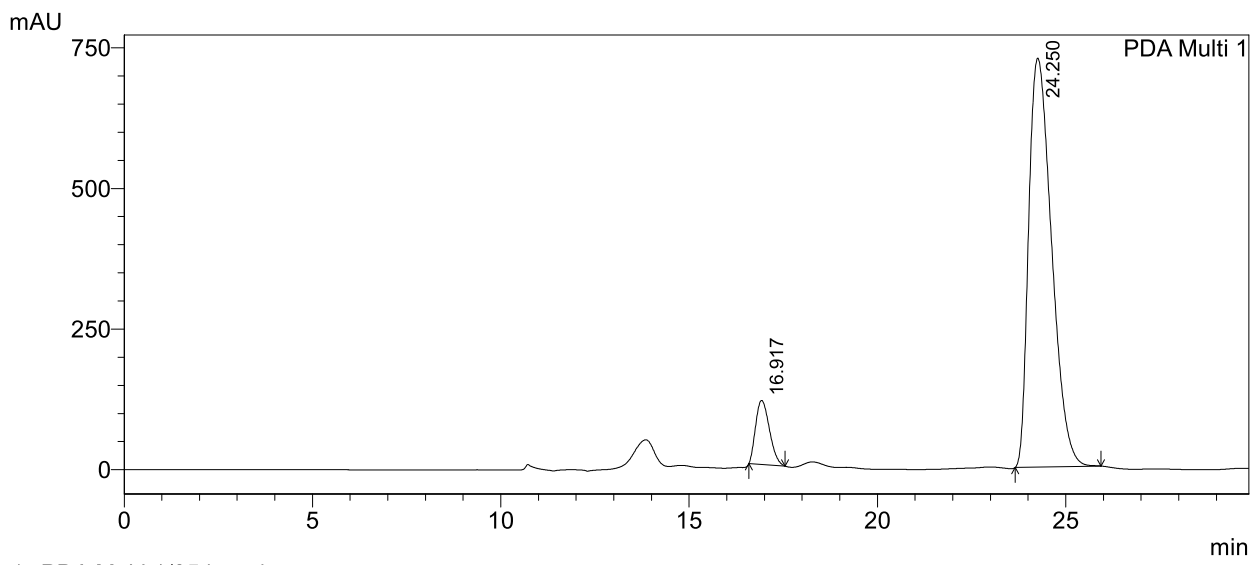

1 PDA Multi 1/254nm 4nm

PeakTable

PDA Ch1 254nm 4nm

| Peak# | Ret. Time | Area     | Height | Area %  | Height % |
|-------|-----------|----------|--------|---------|----------|
| 1     | 16.917    | 2901997  | 113836 | 8.631   | 13.540   |
| 2     | 24.250    | 30721397 | 726925 | 91.369  | 86.460   |
| Total |           | 33623394 | 840761 | 100.000 | 100.000  |

<Chromatogram>

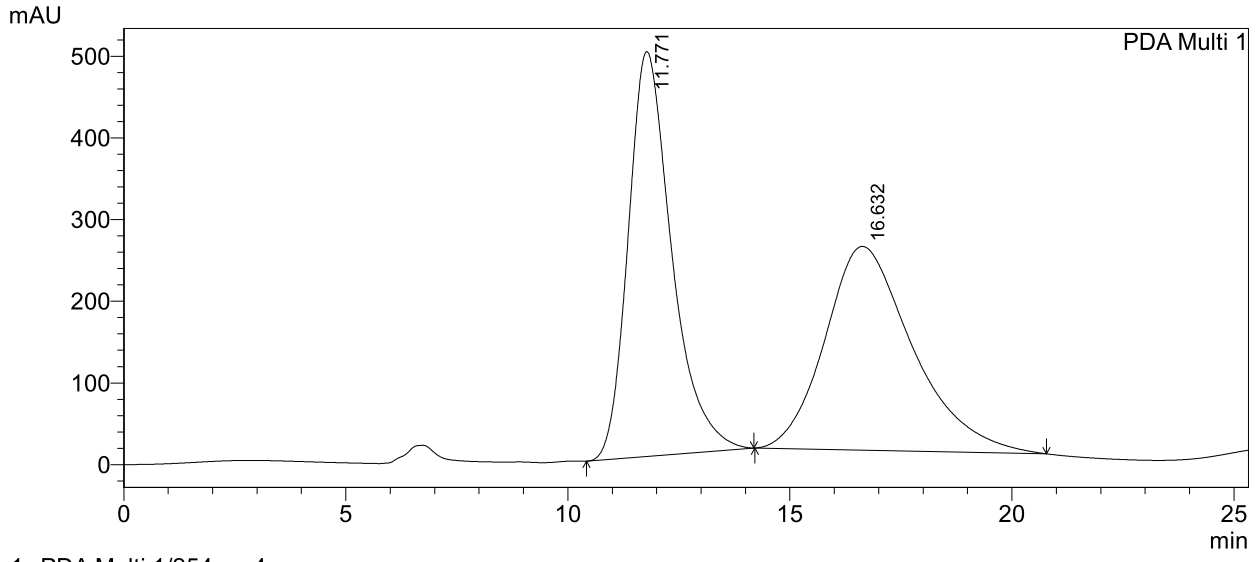

1 PDA Multi 1/254nm 4nm

PeakTable

PDA Ch1 254nm 4nm

| Peak# | Ret. Time | Area     | Height | Area %  | Height % |
|-------|-----------|----------|--------|---------|----------|
| 1     | 11.771    | 33787977 | 495700 | 49.659  | 66.527   |
| 2     | 16.632    | 34251614 | 249415 | 50.341  | 33.473   |
| Total |           | 68039591 | 745115 | 100.000 | 100.000  |

<Chromatogram>

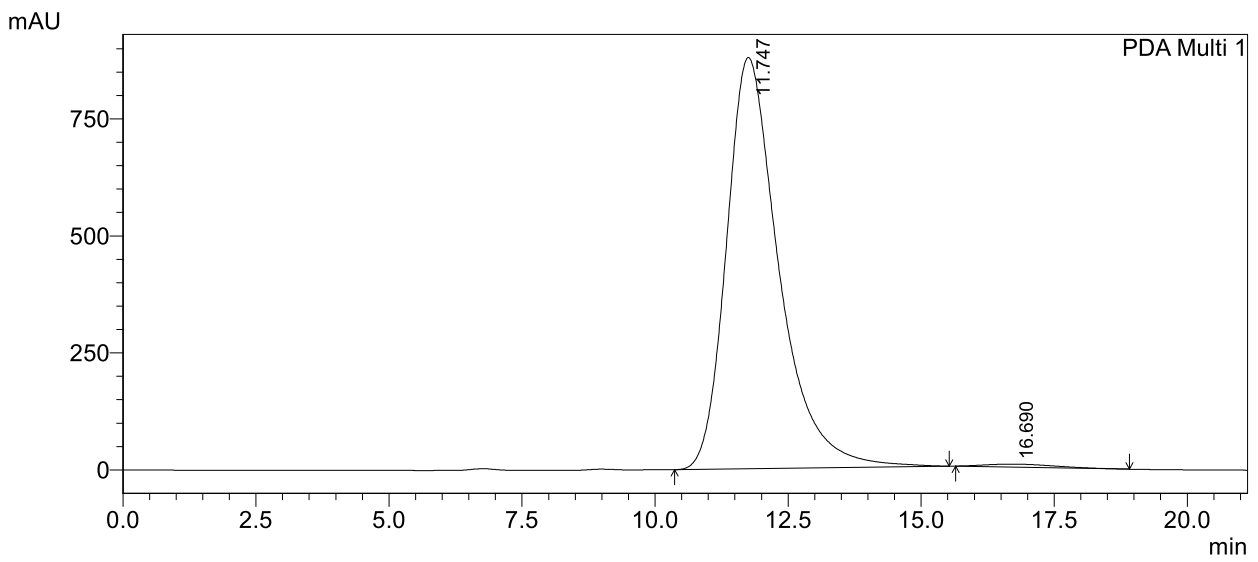

1 PDA Multi 1/254nm 4nm

PeakTable

PDA Ch1 254nm 4nm

| Peak# | Ret. Time | Area     | Height | Area %  | Height % |
|-------|-----------|----------|--------|---------|----------|
| 1     | 11.747    | 60303928 | 878479 | 99.033  | 99.283   |
| 2     | 16.690    | 589082   | 6340   | 0.967   | 0.717    |
| Total |           | 60893009 | 884820 | 100.000 | 100.000  |

<Chromatogram>

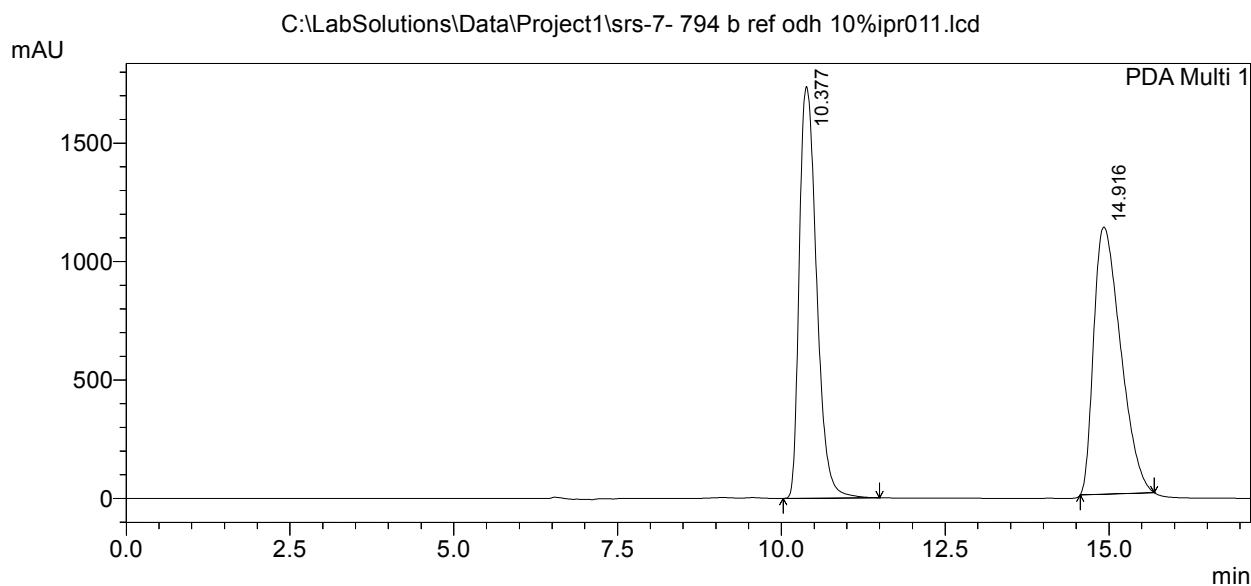

PeakTable

PDA Ch1 254nm 4nm

| Peak# | Ret. Time | Area     | Height  | Area %  | Height % |
|-------|-----------|----------|---------|---------|----------|
| 1     | 10.377    | 31942172 | 1738140 | 49.810  | 60.630   |
| 2     | 14.916    | 32186004 | 1128662 | 50.190  | 39.370   |
| Total |           | 64128176 | 2866802 | 100.000 | 100.000  |

<Chromatogram>

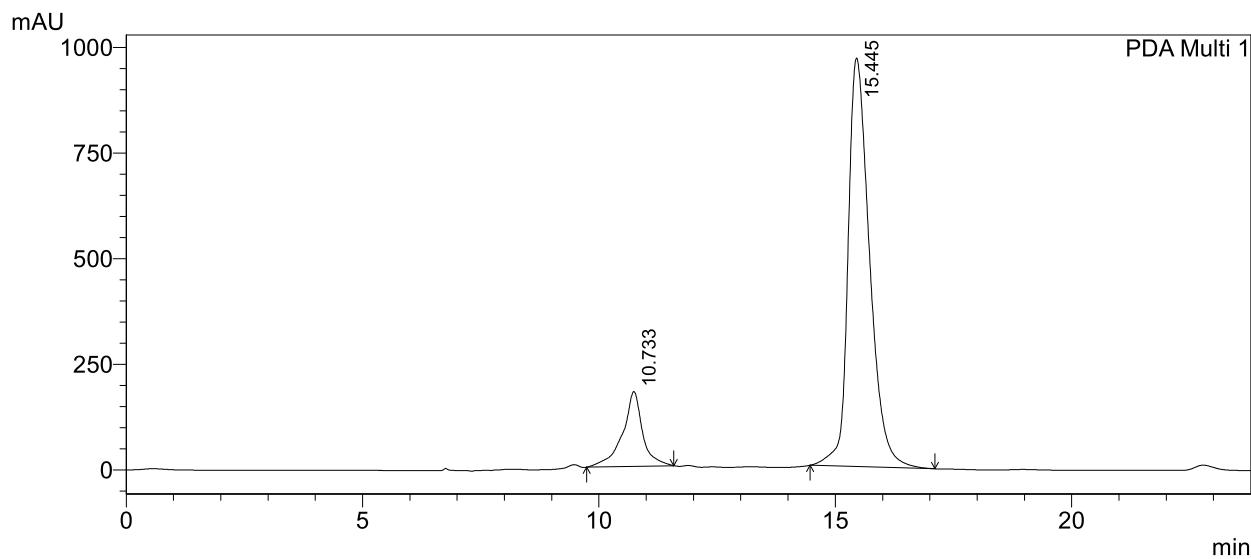

PeakTable

PDA Ch1 254nm 4nm

| Peak# | Ret. Time | Area     | Height  | Area %  | Height % |
|-------|-----------|----------|---------|---------|----------|
| 1     | 10.733    | 5222002  | 177377  | 14.533  | 15.493   |
| 2     | 15.445    | 30708885 | 967512  | 85.467  | 84.507   |
| Total |           | 35930888 | 1144889 | 100.000 | 100.000  |

## &lt;Chromatogram&gt;

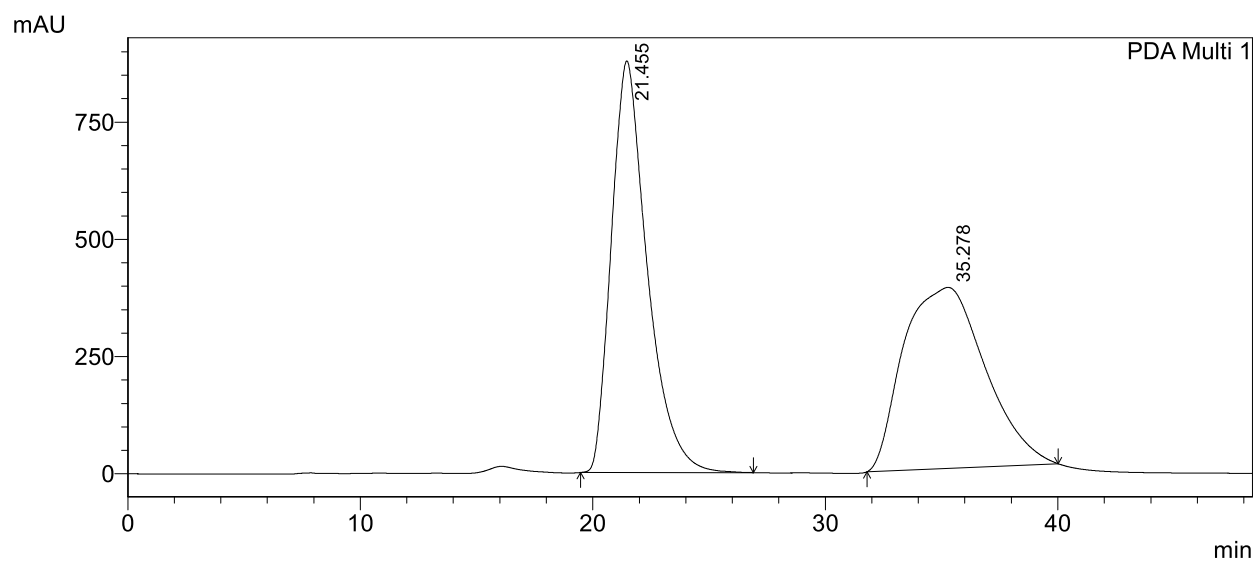

1 PDA Multi 1/254nm 4nm

PeakTable

PDA Ch1 254nm 4nm

| Peak# | Ret. Time | Area      | Height  | Area %  | Height % |
|-------|-----------|-----------|---------|---------|----------|
| 1     | 21.455    | 94365214  | 877835  | 49.988  | 69.465   |
| 2     | 35.278    | 94410770  | 385869  | 50.012  | 30.535   |
| Total |           | 188775984 | 1263704 | 100.000 | 100.000  |

## &lt;Chromatogram&gt;

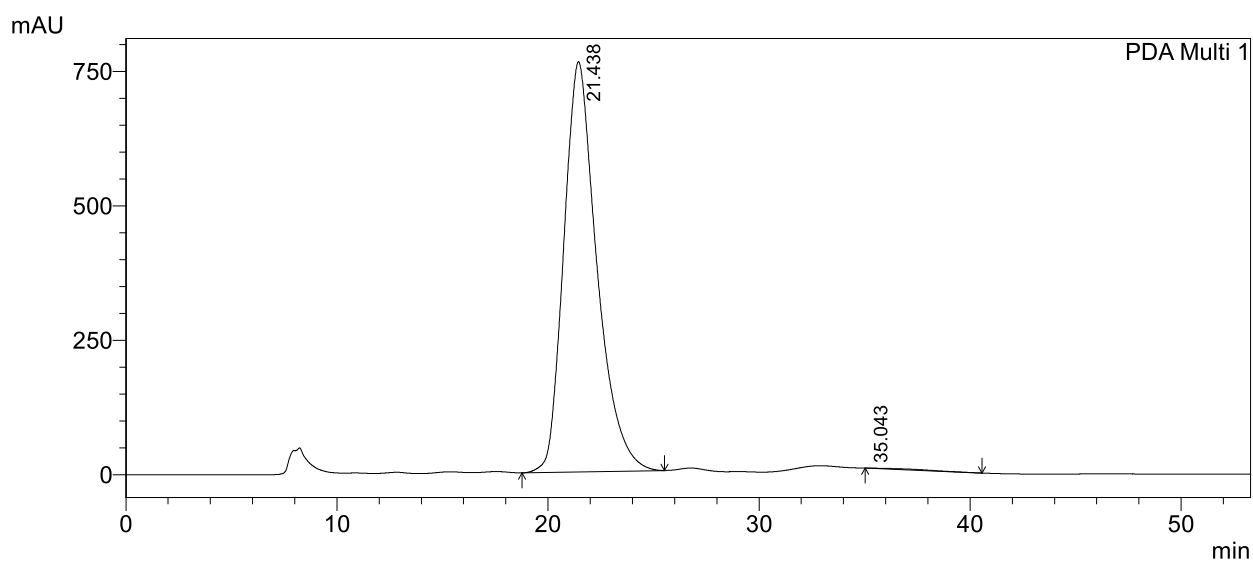

1 PDA Multi 1/254nm 4nm

PeakTable

PDA Ch1 254nm 4nm

| Peak# | Ret. Time | Area     | Height | Area %  | Height % |
|-------|-----------|----------|--------|---------|----------|
| 1     | 21.438    | 83256759 | 763282 | 99.716  | 99.998   |
| 2     | 35.043    | 237325   | 13     | 0.284   | 0.002    |
| Total |           | 83494084 | 763295 | 100.000 | 100.000  |

<Chromatogram>

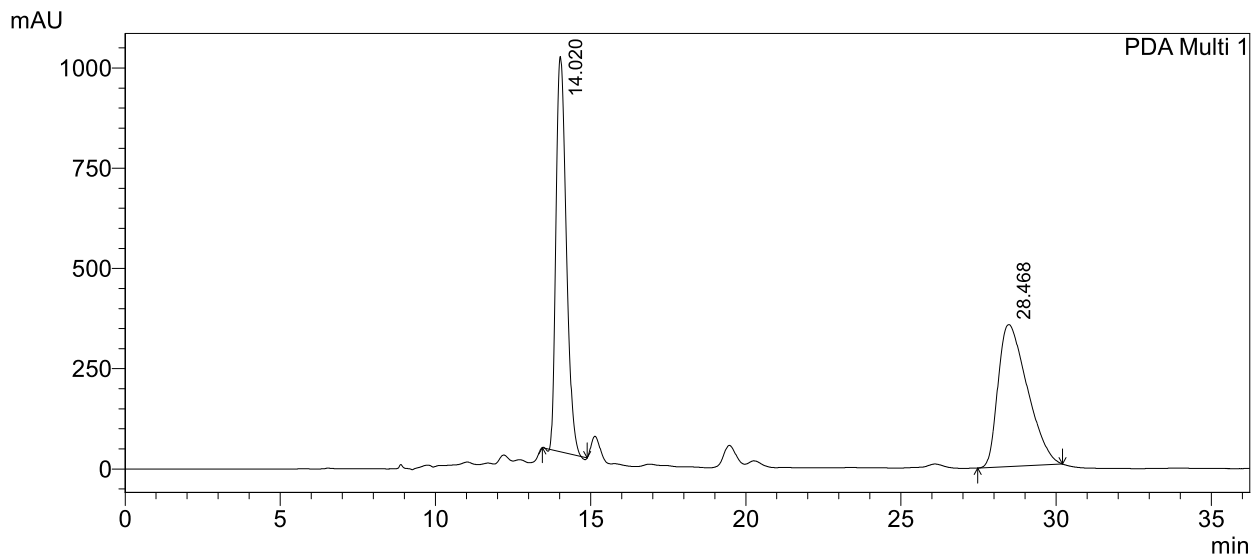

1 PDA Multi 1/254nm 4nm

PeakTable

PDA Ch1 254nm 4nm

| Peak# | Ret. Time | Area     | Height  | Area %  | Height % |
|-------|-----------|----------|---------|---------|----------|
| 1     | 14.020    | 22748450 | 985525  | 49.482  | 73.558   |
| 2     | 28.468    | 23224648 | 354266  | 50.518  | 26.442   |
| Total |           | 45973098 | 1339792 | 100.000 | 100.000  |

<Chromatogram>

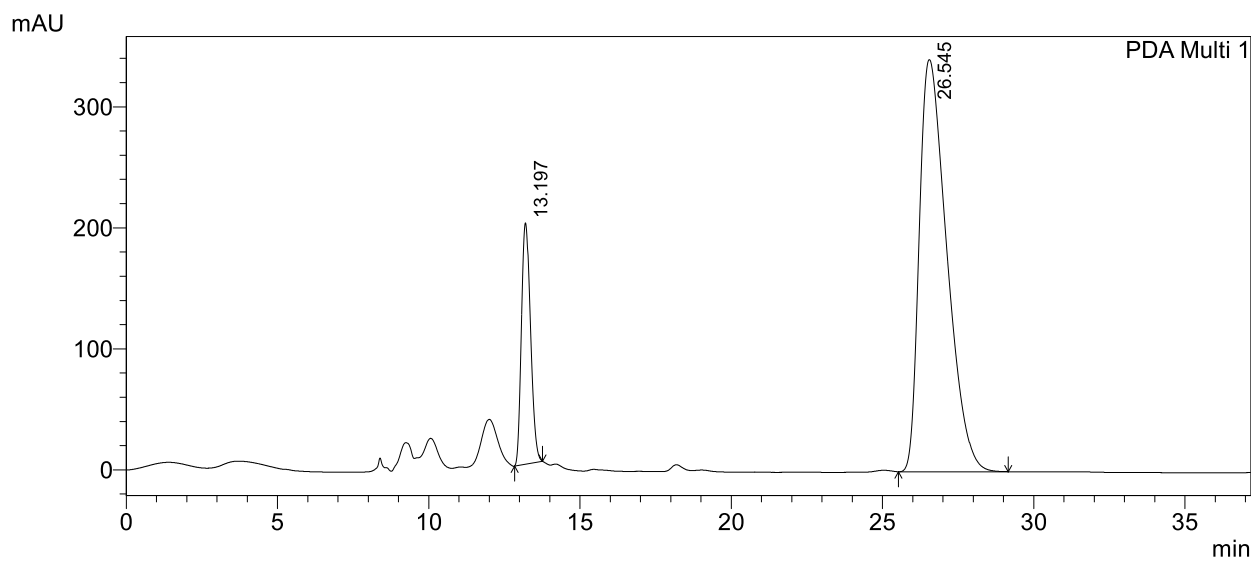

1 PDA Multi 1/254nm 4nm

PeakTable

PDA Ch1 254nm 4nm

| Peak# | Ret. Time | Area     | Height | Area %  | Height % |
|-------|-----------|----------|--------|---------|----------|
| 1     | 13.197    | 4111421  | 199464 | 16.067  | 36.937   |
| 2     | 26.545    | 21478532 | 340553 | 83.933  | 63.063   |
| Total |           | 25589953 | 540017 | 100.000 | 100.000  |



## &lt;Chromatogram&gt;

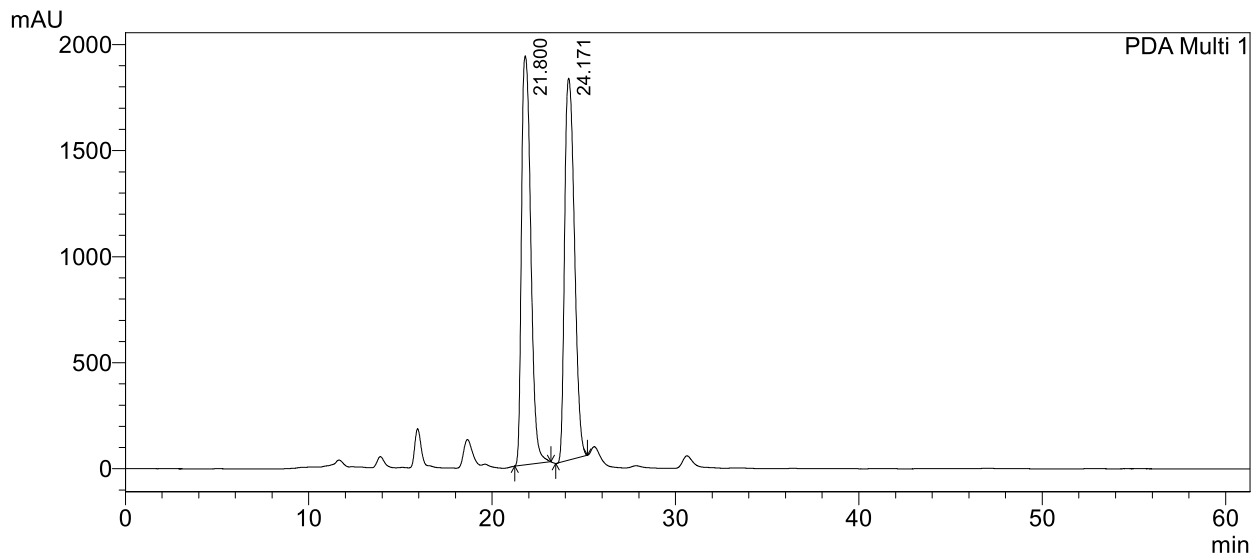

1 PDA Multi 1/254nm 4nm

PeakTable

PDA Ch1 254nm 4nm

| Peak# | Ret. Time | Area      | Height  | Area %  | Height % |
|-------|-----------|-----------|---------|---------|----------|
| 1     | 21.800    | 67872722  | 1928393 | 50.217  | 51.700   |
| 2     | 24.171    | 67285562  | 1801594 | 49.783  | 48.300   |
| Total |           | 135158285 | 3729987 | 100.000 | 100.000  |

## &lt;Chromatogram&gt;

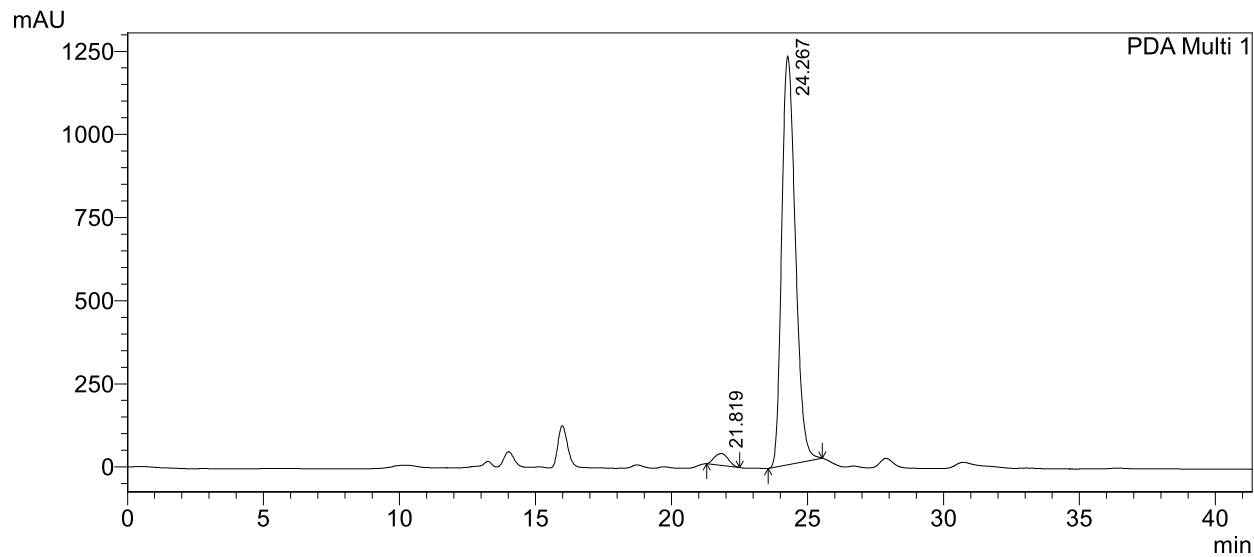

1 PDA Multi 1/254nm 4nm

PeakTable

PDA Ch1 254nm 4nm

| Peak# | Ret. Time | Area     | Height  | Area %  | Height % |
|-------|-----------|----------|---------|---------|----------|
| 1     | 21.819    | 1251192  | 35317   | 2.823   | 2.793    |
| 2     | 24.267    | 43063472 | 1229095 | 97.177  | 97.207   |
| Total |           | 44314664 | 1264412 | 100.000 | 100.000  |

<Chromatogram>

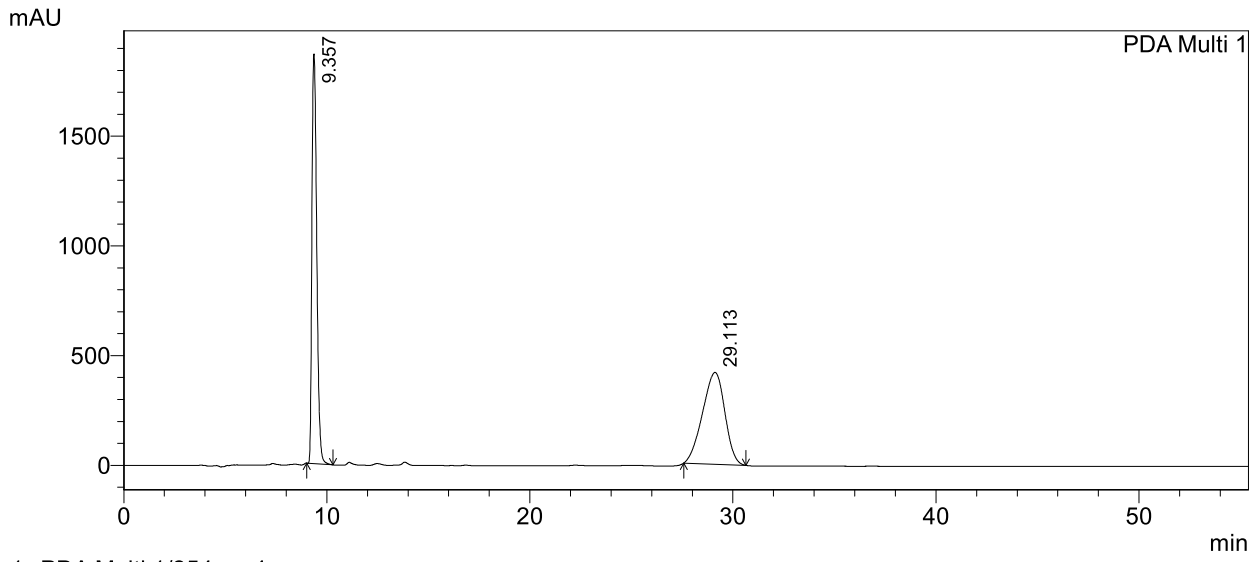

1 PDA Multi 1/254nm 4nm

PeakTable

PDA Ch1 254nm 4nm

| Peak# | Ret. Time | Area     | Height  | Area %  | Height % |
|-------|-----------|----------|---------|---------|----------|
| 1     | 9.357     | 30828699 | 1867298 | 49.075  | 81.677   |
| 2     | 29.113    | 31990796 | 418893  | 50.925  | 18.323   |
| Total |           | 62819494 | 2286191 | 100.000 | 100.000  |

<Chromatogram>

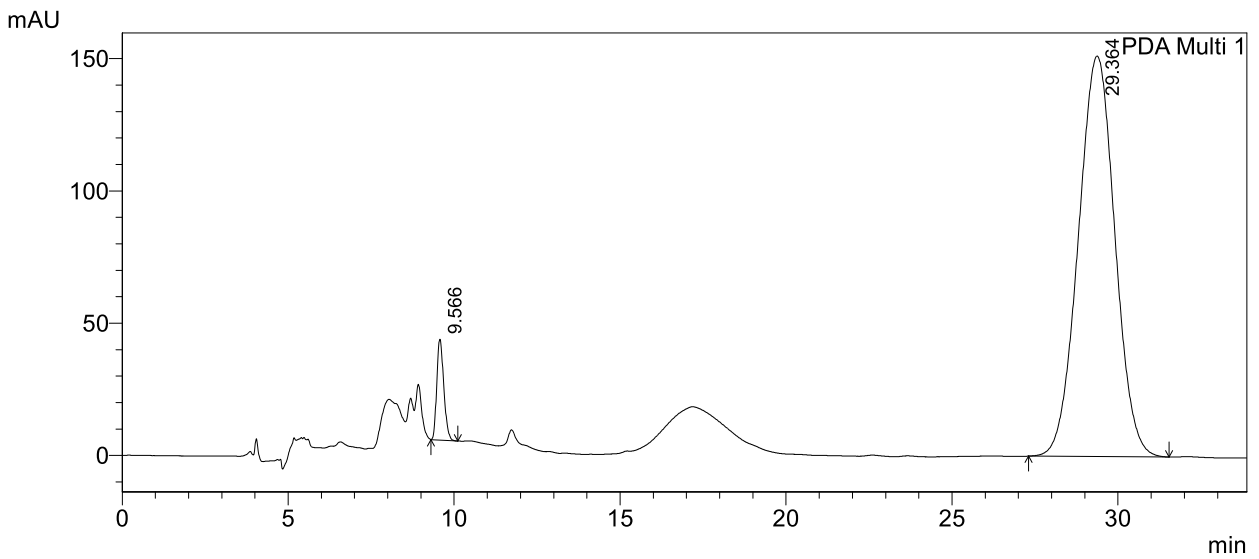

1 PDA Multi 1/254nm 4nm

PeakTable

PDA Ch1 254nm 4nm

| Peak# | Ret. Time | Area     | Height | Area %  | Height % |
|-------|-----------|----------|--------|---------|----------|
| 1     | 9.566     | 560389   | 38144  | 4.606   | 20.124   |
| 2     | 29.364    | 11605033 | 151397 | 95.394  | 79.876   |
| Total |           | 12165422 | 189541 | 100.000 | 100.000  |

## &lt;Chromatogram&gt;

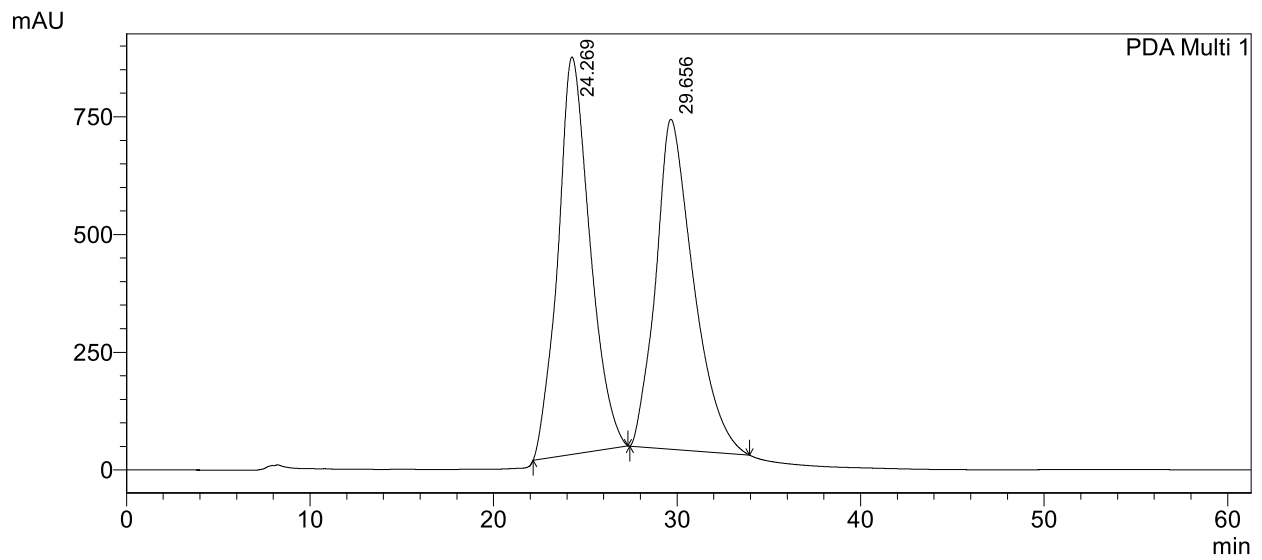

1 PDA Multi 1/254nm 4nm

PeakTable

PDA Ch1 254nm 4nm

| Peak# | Ret. Time | Area      | Height  | Area %  | Height % |
|-------|-----------|-----------|---------|---------|----------|
| 1     | 24.269    | 102763034 | 843938  | 50.617  | 54.640   |
| 2     | 29.656    | 100257551 | 700599  | 49.383  | 45.360   |
| Total |           | 203020586 | 1544537 | 100.000 | 100.000  |

## &lt;Chromatogram&gt;

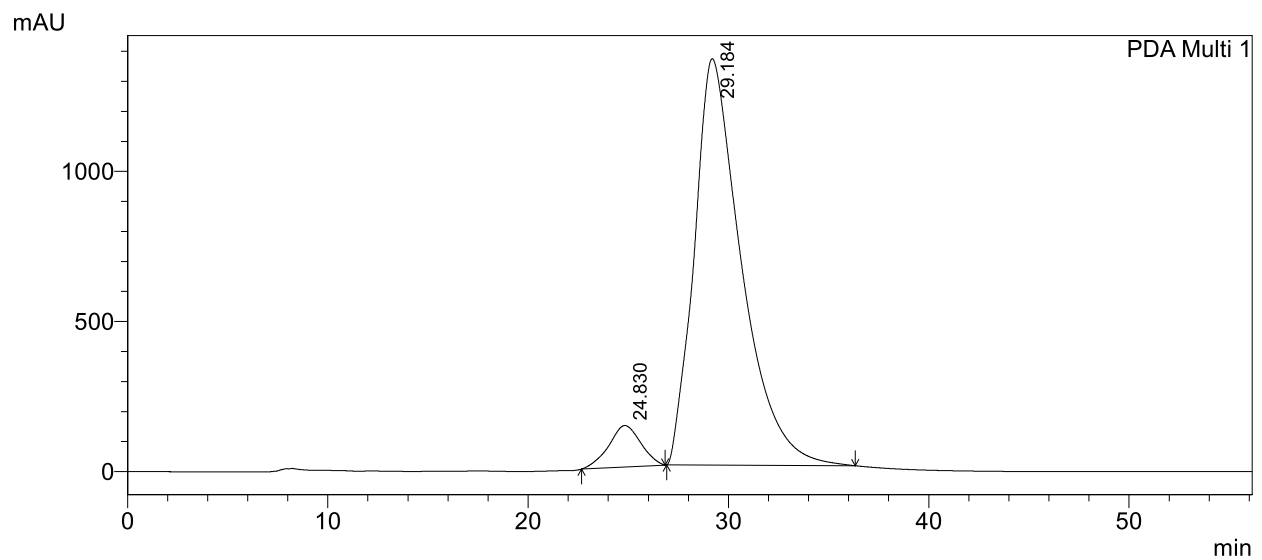

1 PDA Multi 1/254nm 4nm

PeakTable

PDA Ch1 254nm 4nm

| Peak# | Ret. Time | Area      | Height  | Area %  | Height % |
|-------|-----------|-----------|---------|---------|----------|
| 1     | 24.830    | 15403629  | 138170  | 6.514   | 9.260    |
| 2     | 29.184    | 221073709 | 1353881 | 93.486  | 90.740   |
| Total |           | 236477338 | 1492051 | 100.000 | 100.000  |

<Chromatogram>

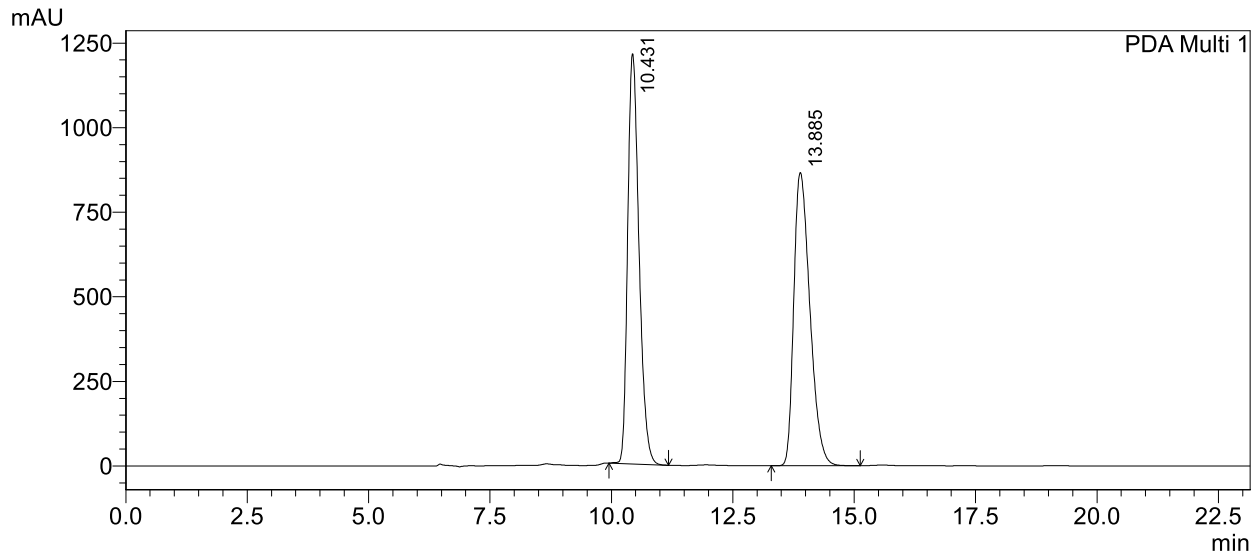

1 PDA Multi 1/254nm 4nm

PeakTable

PDA Ch1 254nm 4nm

| Peak# | Ret. Time | Area     | Height  | Area %  | Height % |
|-------|-----------|----------|---------|---------|----------|
| 1     | 10.431    | 19640864 | 1212073 | 49.566  | 58.307   |
| 2     | 13.885    | 19985158 | 866715  | 50.434  | 41.693   |
| Total |           | 39626022 | 2078788 | 100.000 | 100.000  |

<Chromatogram>

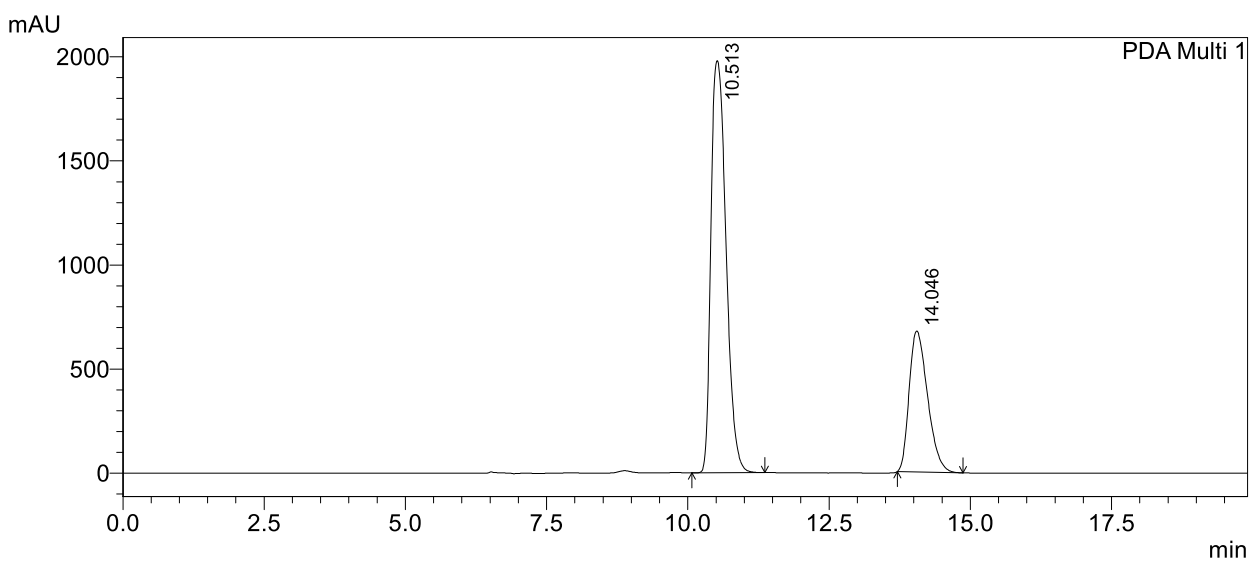

1 PDA Multi 1/254nm 4nm

PeakTable

PDA Ch1 254nm 4nm

| Peak# | Ret. Time | Area     | Height  | Area %  | Height % |
|-------|-----------|----------|---------|---------|----------|
| 1     | 10.513    | 36849841 | 1979617 | 70.583  | 74.522   |
| 2     | 14.046    | 15357711 | 676808  | 29.417  | 25.478   |
| Total |           | 52207552 | 2656426 | 100.000 | 100.000  |

## &lt;Chromatogram&gt;

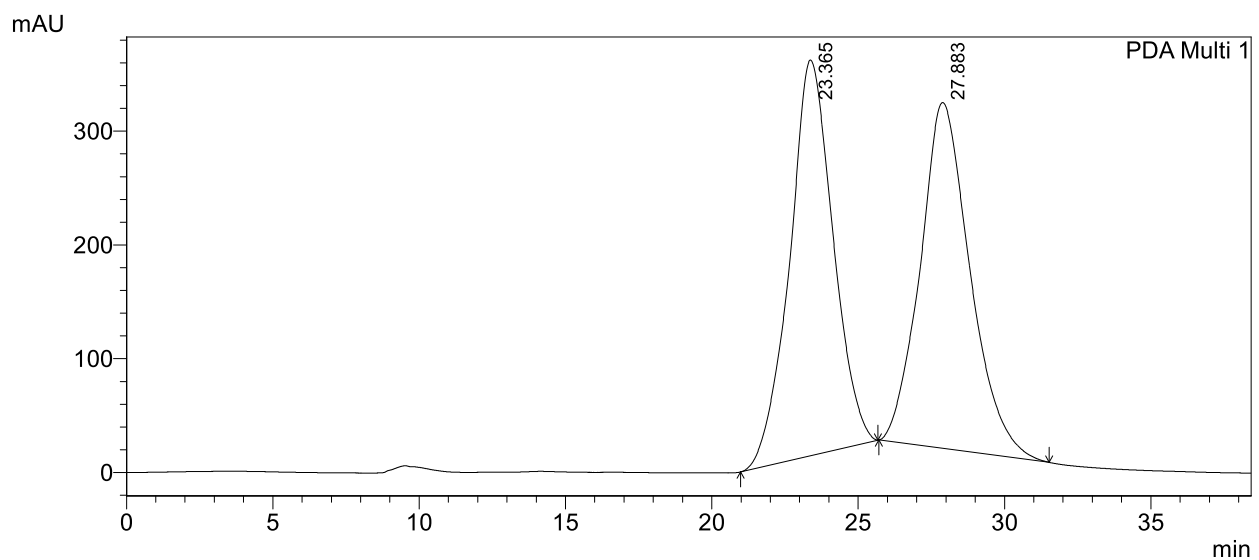

1 PDA Multi 1/254nm 4nm

PeakTable

PDA Ch1 254nm 4nm

| Peak# | Ret. Time | Area     | Height | Area %  | Height % |
|-------|-----------|----------|--------|---------|----------|
| 1     | 23.365    | 35747840 | 347773 | 49.828  | 53.362   |
| 2     | 27.883    | 35995019 | 303945 | 50.172  | 46.638   |
| Total |           | 71742859 | 651718 | 100.000 | 100.000  |

## &lt;Chromatogram&gt;

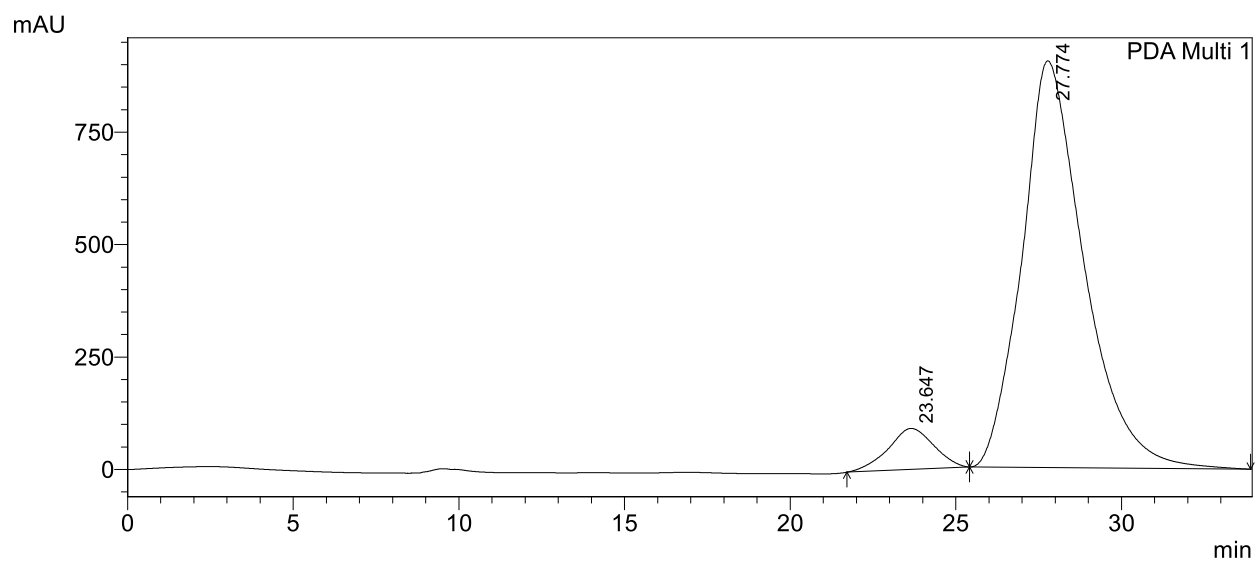

1 PDA Multi 1/254nm 4nm

PeakTable

PDA Ch1 254nm 4nm

| Peak# | Ret. Time | Area      | Height | Area %  | Height % |
|-------|-----------|-----------|--------|---------|----------|
| 1     | 23.647    | 8757720   | 91343  | 6.894   | 9.173    |
| 2     | 27.774    | 118280555 | 904399 | 93.106  | 90.827   |
| Total |           | 127038275 | 995742 | 100.000 | 100.000  |

<Chromatogram>

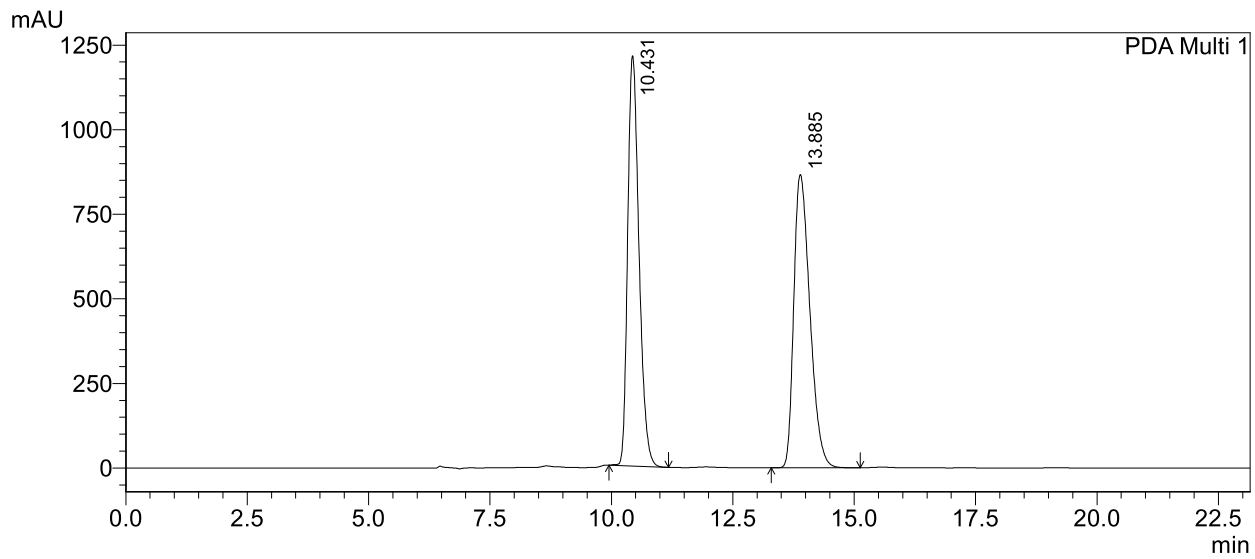

1 PDA Multi 1/254nm 4nm

PeakTable

PDA Ch1 254nm 4nm

| Peak# | Ret. Time | Area     | Height  | Area %  | Height % |
|-------|-----------|----------|---------|---------|----------|
| 1     | 10.431    | 19640864 | 1212073 | 49.566  | 58.307   |
| 2     | 13.885    | 19985158 | 866715  | 50.434  | 41.693   |
| Total |           | 39626022 | 2078788 | 100.000 | 100.000  |

<Chromatogram>

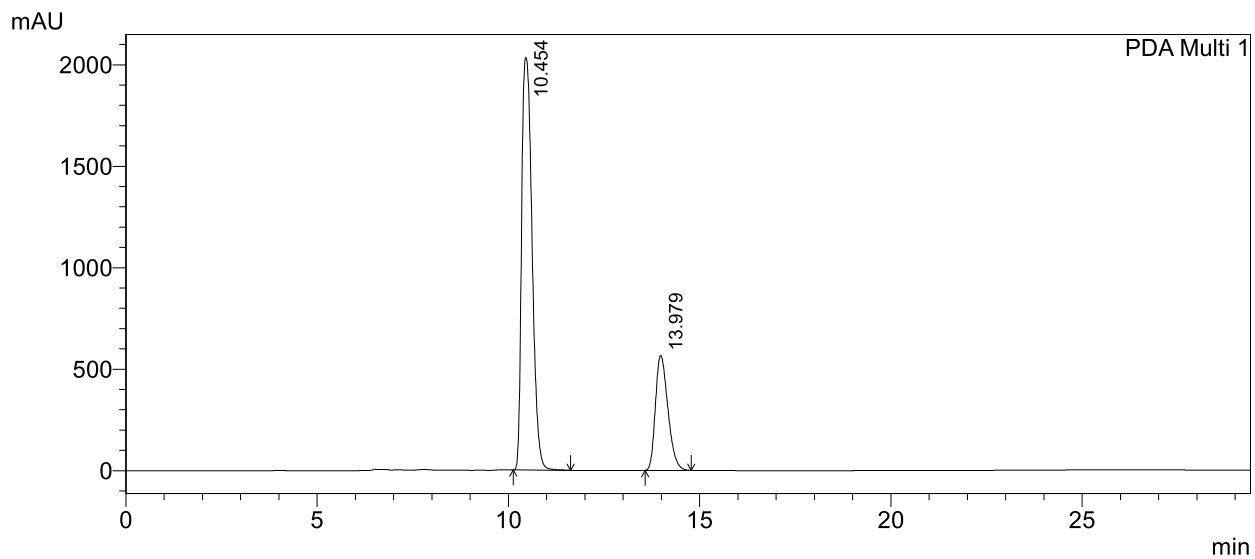

1 PDA Multi 1/254nm 4nm

PeakTable

PDA Ch1 254nm 4nm

| Peak# | Ret. Time | Area     | Height  | Area %  | Height % |
|-------|-----------|----------|---------|---------|----------|
| 1     | 10.454    | 38519376 | 2032138 | 74.999  | 78.168   |
| 2     | 13.979    | 12840536 | 567565  | 25.001  | 21.832   |
| Total |           | 51359912 | 2599704 | 100.000 | 100.000  |

## &lt;Chromatogram&gt;

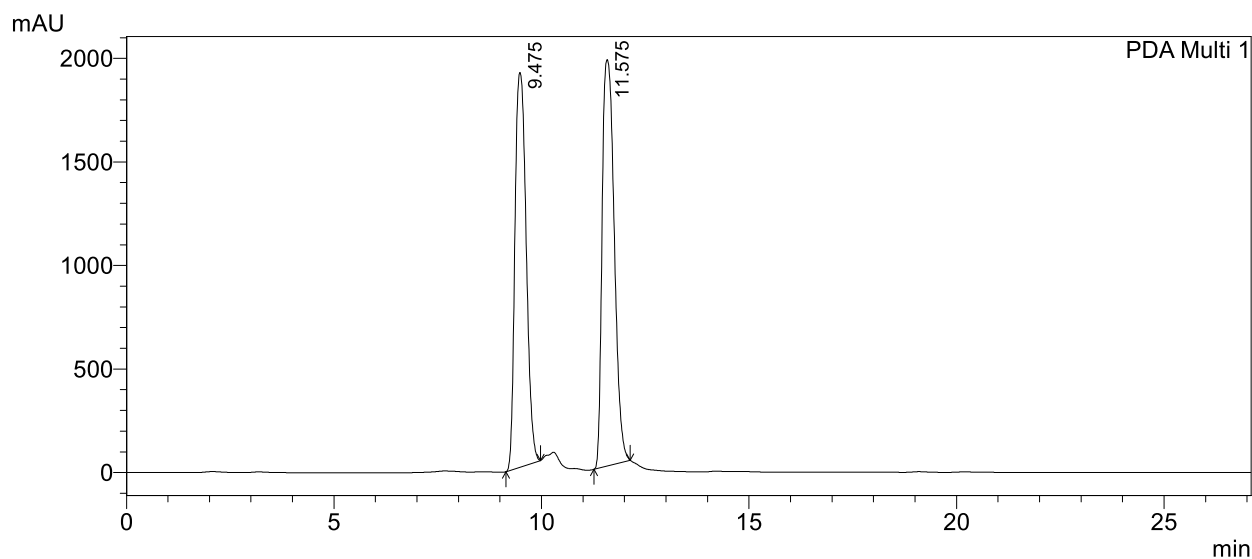

1 PDA Multi 1/254nm 4nm

PeakTable

PDA Ch1 254nm 4nm

| Peak# | Ret. Time | Area     | Height  | Area %  | Height % |
|-------|-----------|----------|---------|---------|----------|
| 1     | 9.475     | 35926556 | 1906995 | 47.389  | 49.275   |
| 2     | 11.575    | 39884760 | 1963087 | 52.611  | 50.725   |
| Total |           | 75811317 | 3870082 | 100.000 | 100.000  |

## &lt;Chromatogram&gt;

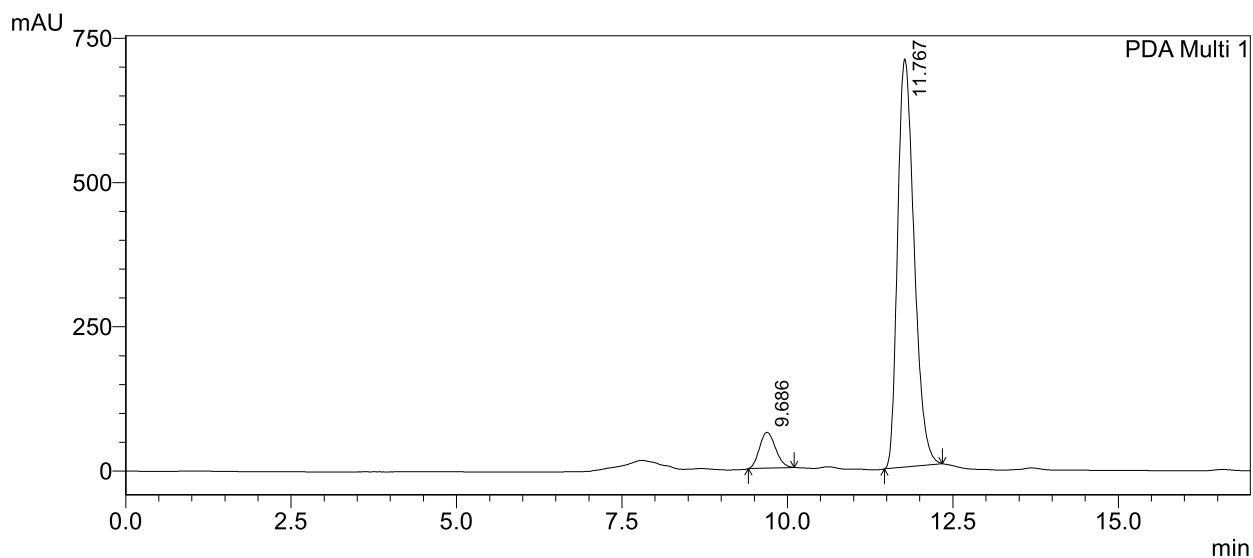

1 PDA Multi 1/254nm 4nm

PeakTable

PDA Ch1 254nm 4nm

| Peak# | Ret. Time | Area     | Height | Area %  | Height % |
|-------|-----------|----------|--------|---------|----------|
| 1     | 9.686     | 1046527  | 62130  | 7.845   | 8.075    |
| 2     | 11.767    | 12292855 | 707275 | 92.155  | 91.925   |
| Total |           | 13339382 | 769405 | 100.000 | 100.000  |

<Chromatogram>

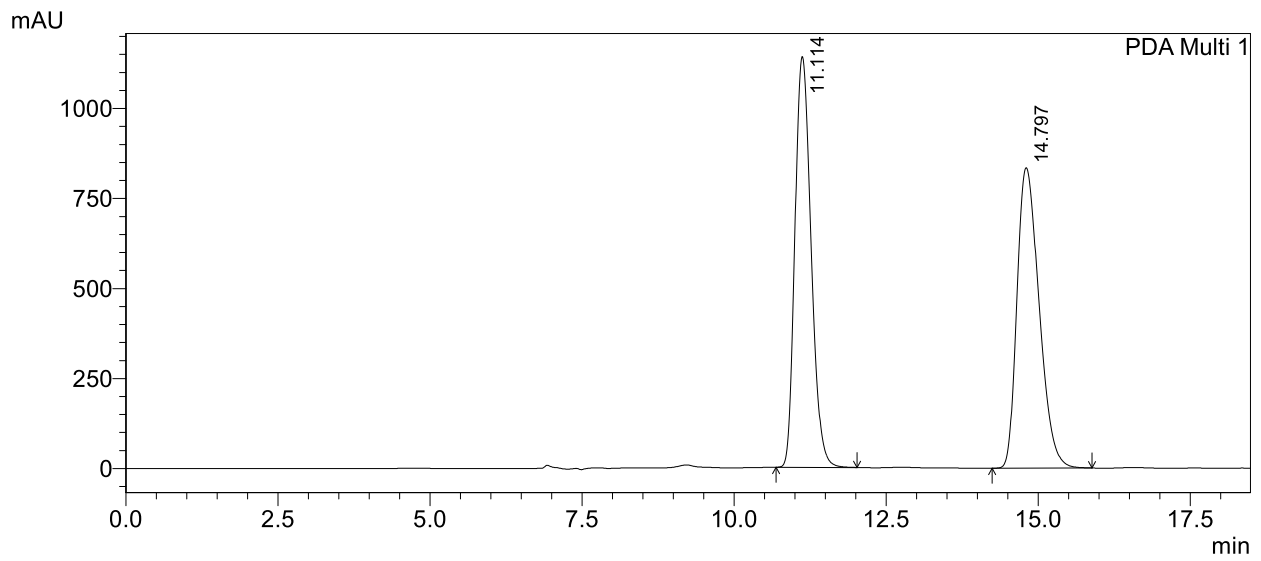

1 PDA Multi 1/254nm 4nm

PeakTable

PDA Ch1 254nm 4nm

| Peak# | Ret. Time | Area     | Height  | Area %  | Height % |
|-------|-----------|----------|---------|---------|----------|
| 1     | 11.114    | 21078625 | 1140511 | 49.926  | 57.739   |
| 2     | 14.797    | 21141260 | 834759  | 50.074  | 42.261   |
| Total |           | 42219884 | 1975271 | 100.000 | 100.000  |

<Chromatogram>

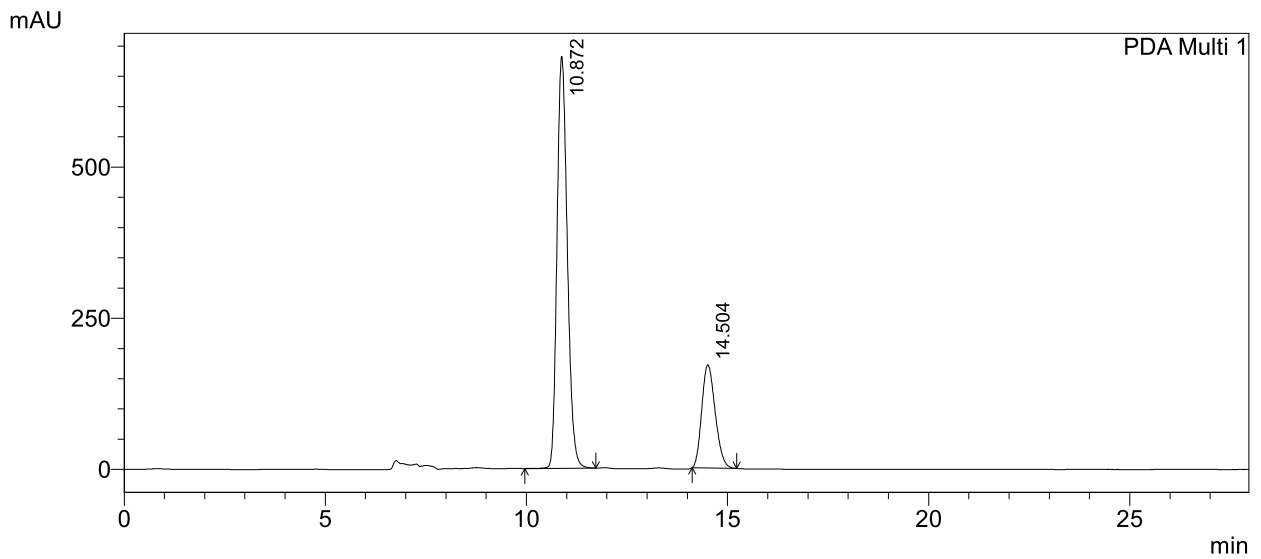

1 PDA Multi 1/254nm 4nm

PeakTable

PDA Ch1 254nm 4nm

| Peak# | Ret. Time | Area     | Height | Area %  | Height % |
|-------|-----------|----------|--------|---------|----------|
| 1     | 10.872    | 12162751 | 680972 | 75.373  | 79.972   |
| 2     | 14.504    | 3973901  | 170536 | 24.627  | 20.028   |
| Total |           | 16136652 | 851508 | 100.000 | 100.000  |



## &lt;Chromatogram&gt;

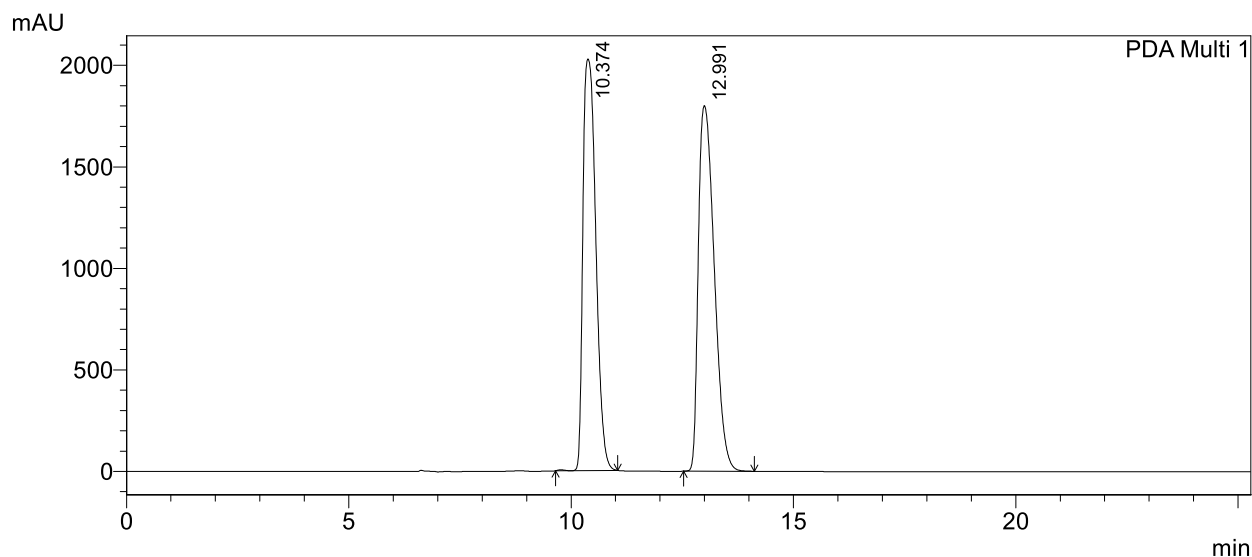

1 PDA Multi 1/254nm 4nm

PeakTable

PDA Ch1 254nm 4nm

| Peak# | Ret. Time | Area     | Height  | Area %  | Height % |
|-------|-----------|----------|---------|---------|----------|
| 1     | 10.374    | 40875133 | 2027593 | 47.712  | 52.972   |
| 2     | 12.991    | 44794891 | 1800071 | 52.288  | 47.028   |
| Total |           | 85670024 | 3827665 | 100.000 | 100.000  |

## &lt;Chromatogram&gt;

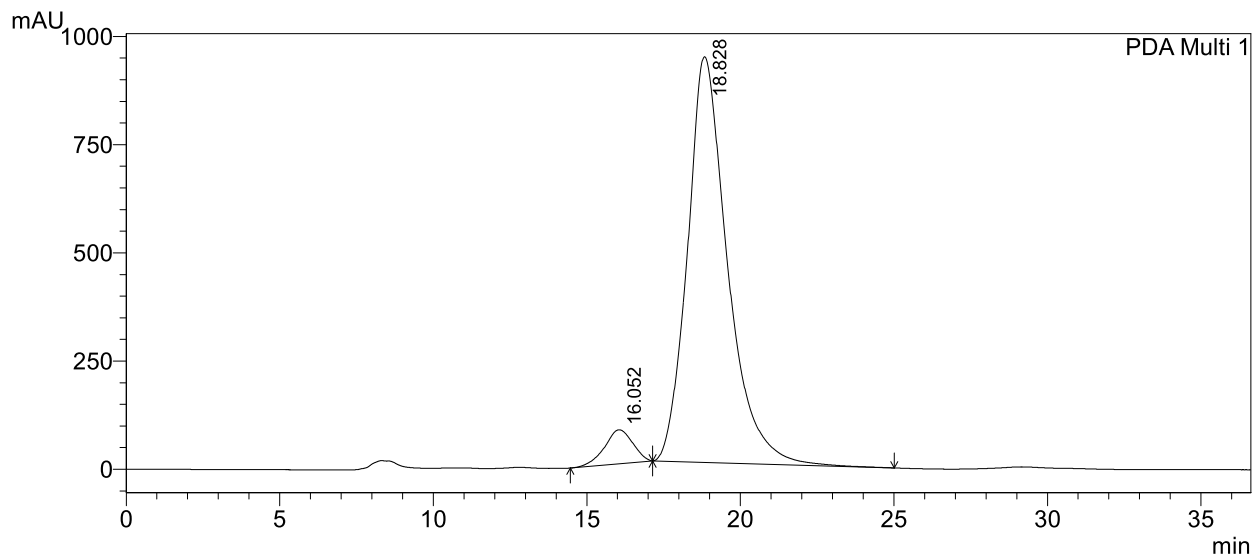

1 PDA Multi 1/254nm 4nm

PeakTable

PDA Ch1 254nm 4nm

| Peak# | Ret. Time | Area     | Height  | Area %  | Height % |
|-------|-----------|----------|---------|---------|----------|
| 1     | 16.052    | 5031965  | 78539   | 5.595   | 7.733    |
| 2     | 18.828    | 84911612 | 937119  | 94.405  | 92.267   |
| Total |           | 89943577 | 1015658 | 100.000 | 100.000  |

<Chromatogram>

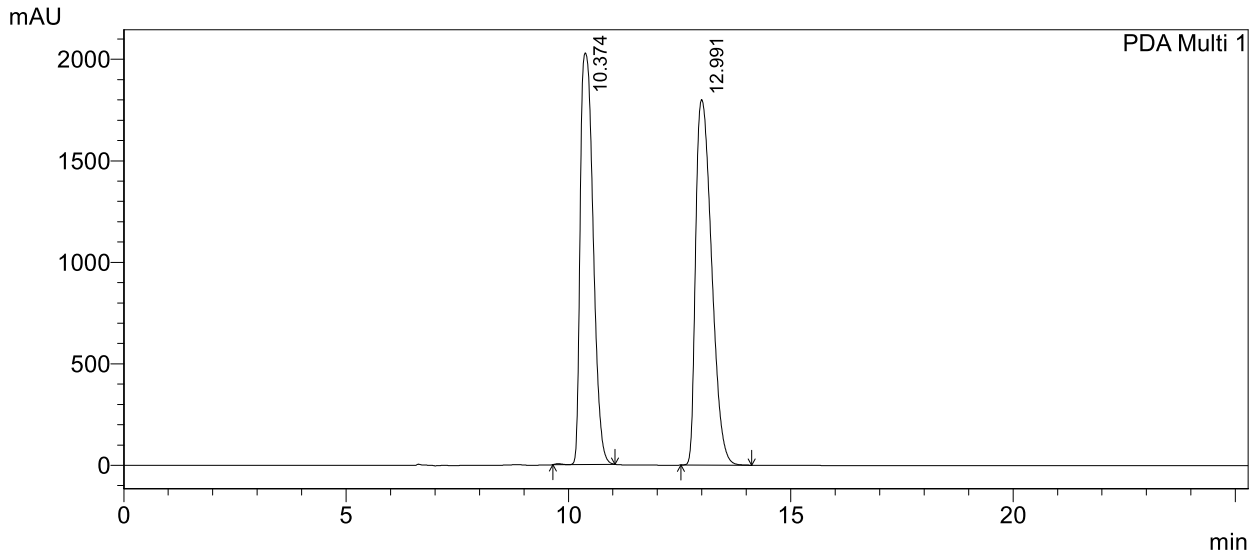

PeakTable

PDA Ch1 254nm 4nm

| Peak# | Ret. Time | Area     | Height  | Area %  | Height % |
|-------|-----------|----------|---------|---------|----------|
| 1     | 10.374    | 40875133 | 2027593 | 47.712  | 52.972   |
| 2     | 12.991    | 44794891 | 1800071 | 52.288  | 47.028   |
| Total |           | 85670024 | 3827665 | 100.000 | 100.000  |

<Chromatogram>

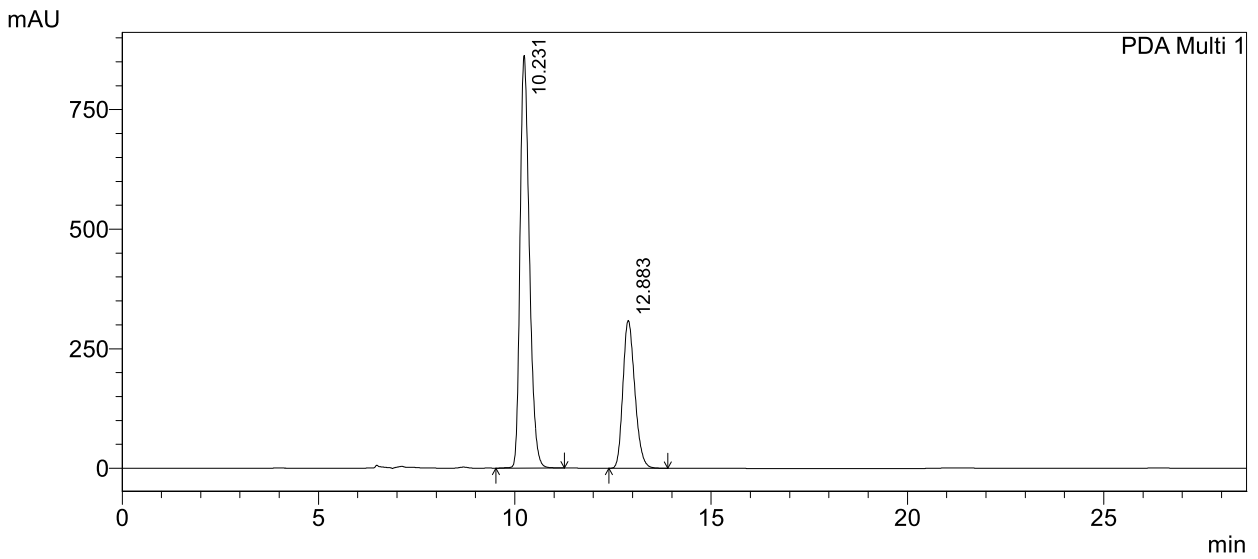

PeakTable

PDA Ch1 254nm 4nm

| Peak# | Ret. Time | Area     | Height  | Area %  | Height % |
|-------|-----------|----------|---------|---------|----------|
| 1     | 10.231    | 14252814 | 862872  | 68.621  | 73.634   |
| 2     | 12.883    | 6517599  | 308969  | 31.379  | 26.366   |
| Total |           | 20770413 | 1171841 | 100.000 | 100.000  |

## &lt;Chromatogram&gt;

C:\LabSolutions\Data\Project1\k-9-119 r008.lcd

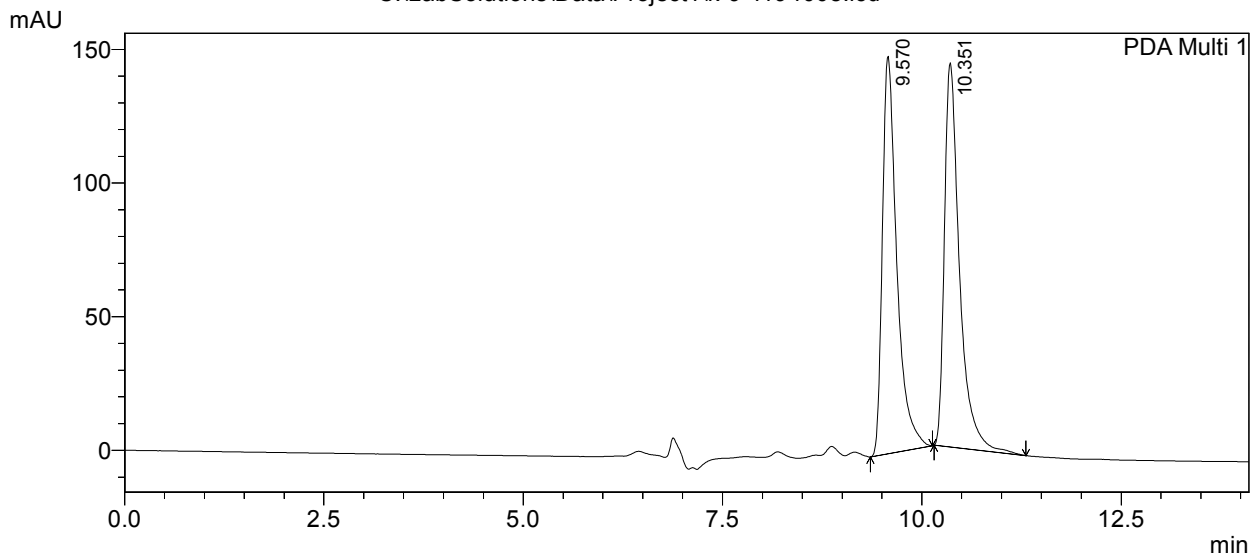

1 PDA Multi 1/254nm 4nm

PeakTable

PDA Ch1 254nm 4nm

| Peak# | Ret. Time | Area    | Height | Area %  | Height % |
|-------|-----------|---------|--------|---------|----------|
| 1     | 9.570     | 1878728 | 148766 | 49.833  | 50.831   |
| 2     | 10.351    | 1891344 | 143901 | 50.167  | 49.169   |
| Total |           | 3770072 | 292667 | 100.000 | 100.000  |

## &lt;Chromatogram&gt;

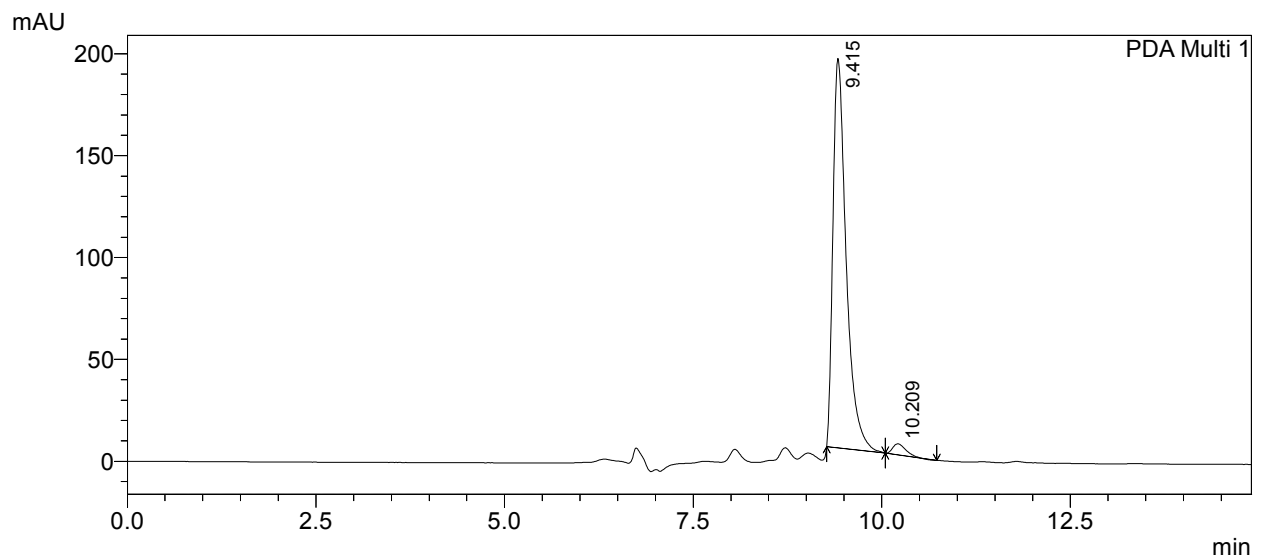

1 PDA Multi 1/254nm 4nm

PeakTable

PDA Ch1 254nm 4nm

| Peak# | Ret. Time | Area    | Height | Area %  | Height % |
|-------|-----------|---------|--------|---------|----------|
| 1     | 9.415     | 2321911 | 191176 | 97.395  | 97.268   |
| 2     | 10.209    | 62099   | 5369   | 2.605   | 2.732    |
| Total |           | 2384009 | 196546 | 100.000 | 100.000  |

<Chromatogram>

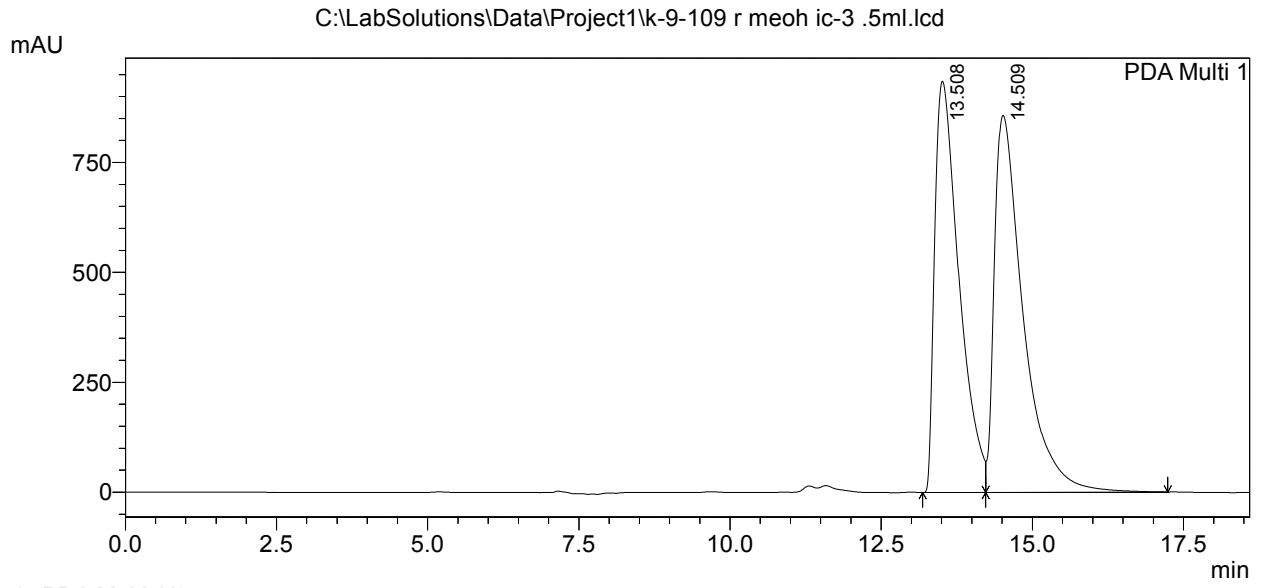

PeakTable

PDA Ch1 254nm 4nm

| Peak# | Ret. Time | Area     | Height  | Area %  | Height % |
|-------|-----------|----------|---------|---------|----------|
| 1     | 13.508    | 26248588 | 935689  | 47.985  | 52.173   |
| 2     | 14.509    | 28452965 | 857757  | 52.015  | 47.827   |
| Total |           | 54701554 | 1793446 | 100.000 | 100.000  |

<Chromatogram>

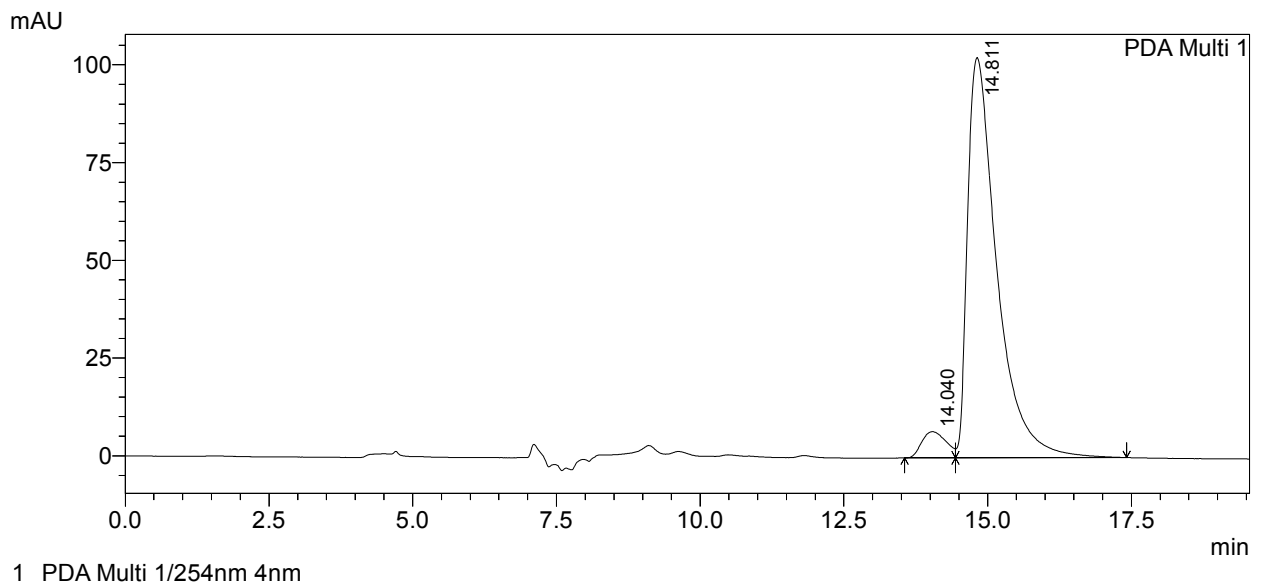

PeakTable

PDA Ch1 254nm 4nm

| Peak# | Ret. Time | Area    | Height | Area %  | Height % |
|-------|-----------|---------|--------|---------|----------|
| 1     | 14.040    | 198773  | 6698   | 5.192   | 6.139    |
| 2     | 14.811    | 3629324 | 102416 | 94.808  | 93.861   |
| Total |           | 3828097 | 109114 | 100.000 | 100.000  |

## &lt;Chromatogram&gt;

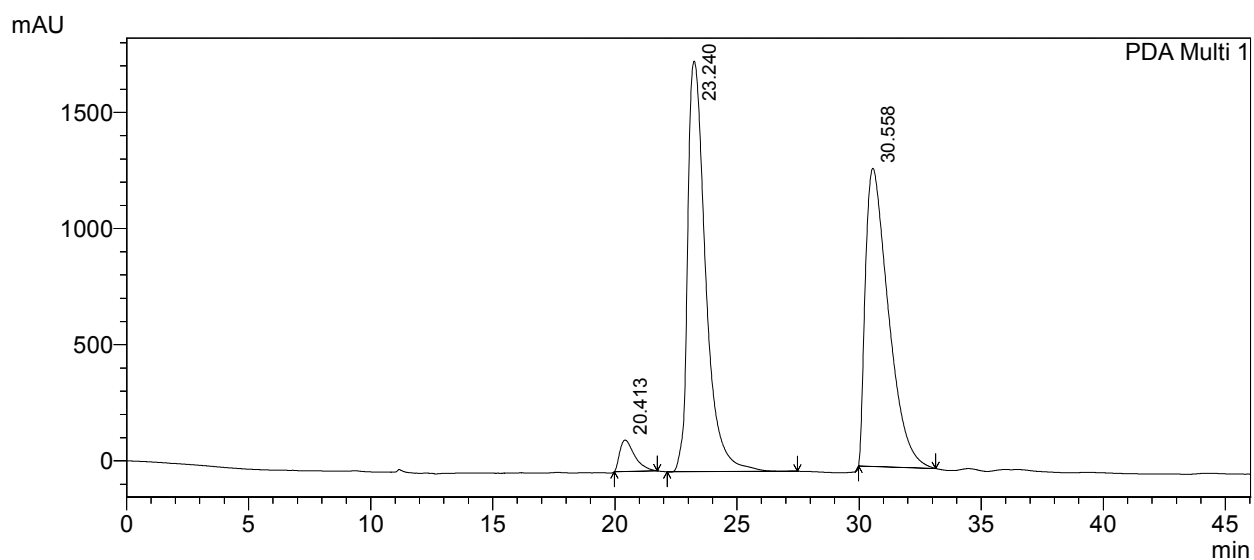

1 PDA Multi 1/254nm 4nm

PeakTable

PDA Ch1 254nm 4nm

| Peak# | Ret. Time | Area      | Height  | Area %  | Height % |
|-------|-----------|-----------|---------|---------|----------|
| 1     | 20.413    | 5714931   | 134883  | 3.172   | 4.234    |
| 2     | 23.240    | 90191223  | 1767086 | 50.066  | 55.467   |
| 3     | 30.558    | 84238011  | 1283869 | 46.761  | 40.299   |
| Total |           | 180144165 | 3185837 | 100.000 | 100.000  |

## &lt;Chromatogram&gt;

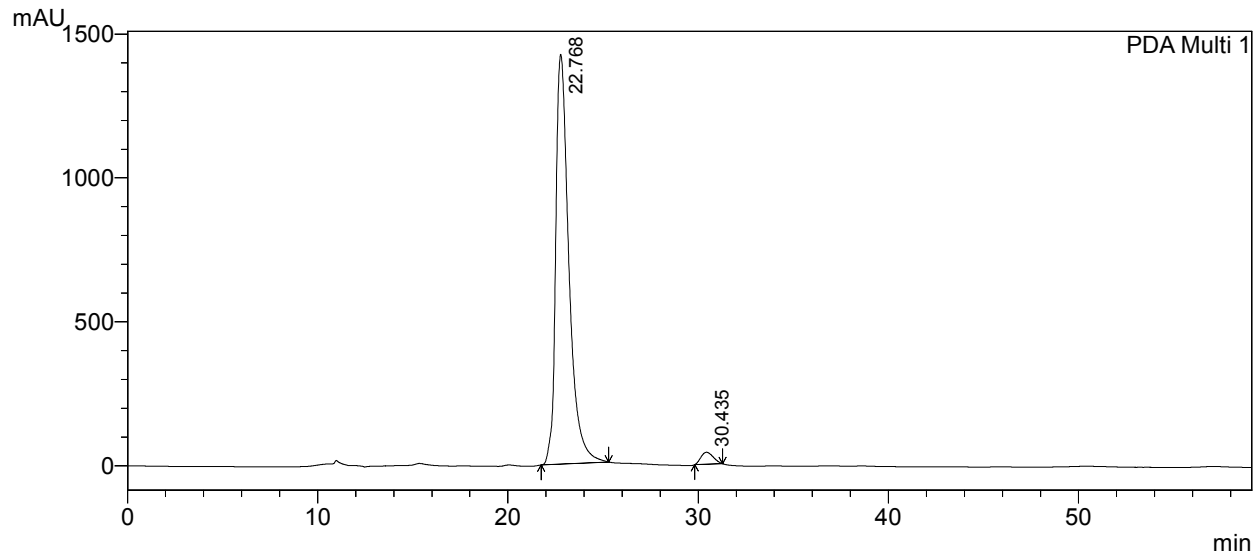

1 PDA Multi 1/254nm 4nm

PeakTable

PDA Ch1 254nm 4nm

| Peak# | Ret. Time | Area     | Height  | Area %  | Height % |
|-------|-----------|----------|---------|---------|----------|
| 1     | 22.768    | 68670177 | 1424000 | 97.307  | 97.136   |
| 2     | 30.435    | 1900279  | 41990   | 2.693   | 2.864    |
| Total |           | 70570456 | 1465990 | 100.000 | 100.000  |

<Chromatogram>

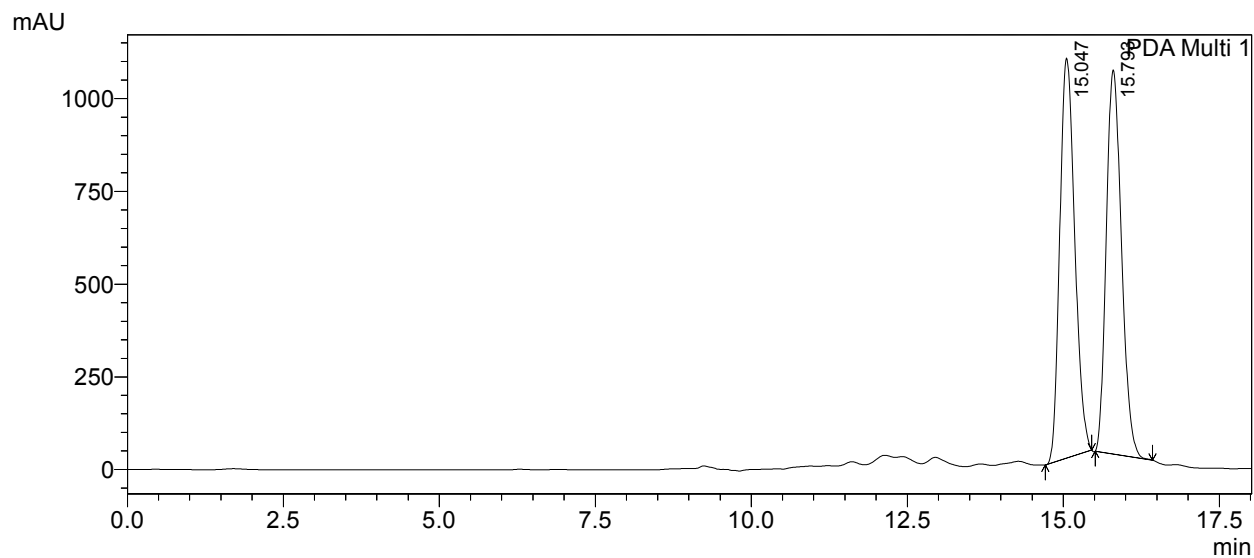

1 PDA Multi 1/254nm 4nm

PeakTable

PDA Ch1 254nm 4nm

| Peak# | Ret. Time | Area     | Height  | Area %  | Height % |
|-------|-----------|----------|---------|---------|----------|
| 1     | 15.047    | 18019031 | 1079131 | 50.627  | 51.021   |
| 2     | 15.793    | 17572866 | 1035948 | 49.373  | 48.979   |
| Total |           | 35591897 | 2115078 | 100.000 | 100.000  |

<Chromatogram>

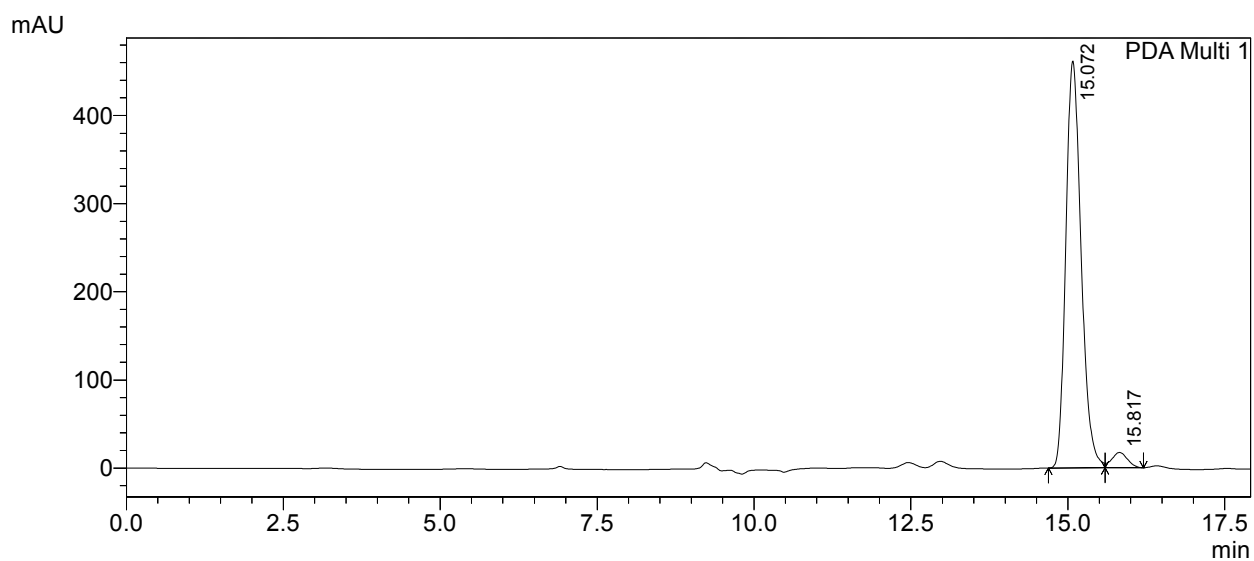

1 PDA Multi 1/254nm 4nm

PeakTable

PDA Ch1 254nm 4nm

| Peak# | Ret. Time | Area    | Height | Area %  | Height % |
|-------|-----------|---------|--------|---------|----------|
| 1     | 15.072    | 7834091 | 461689 | 96.284  | 96.368   |
| 2     | 15.817    | 302331  | 17402  | 3.716   | 3.632    |
| Total |           | 8136422 | 479091 | 100.000 | 100.000  |
